# Supplementary material for: T-follicular helper cells are epigenetically poised to transdifferentiate into T-regulatory type 1 cells
Source: eLife journal article supplement (doi:10.7554/elife.97665), 2024-07-29

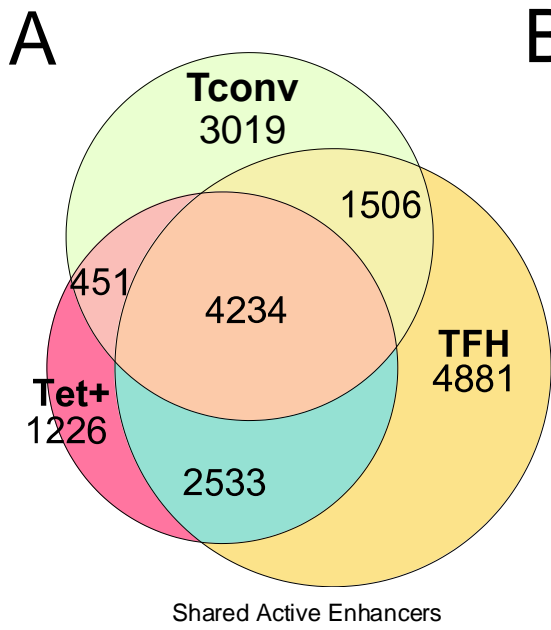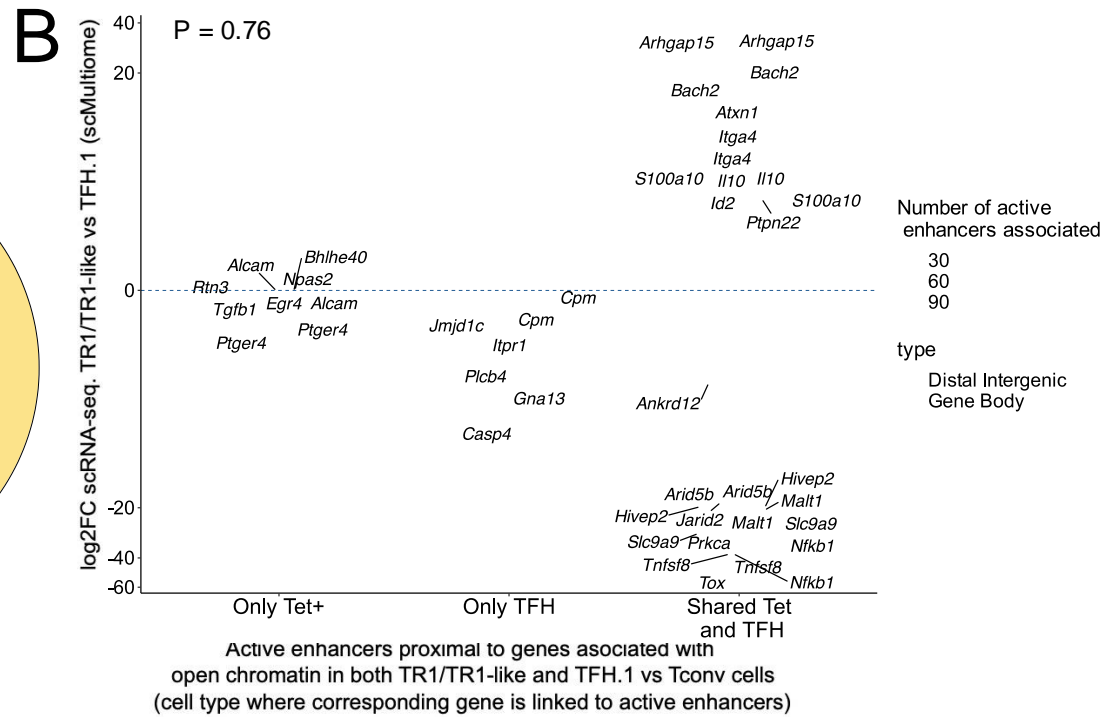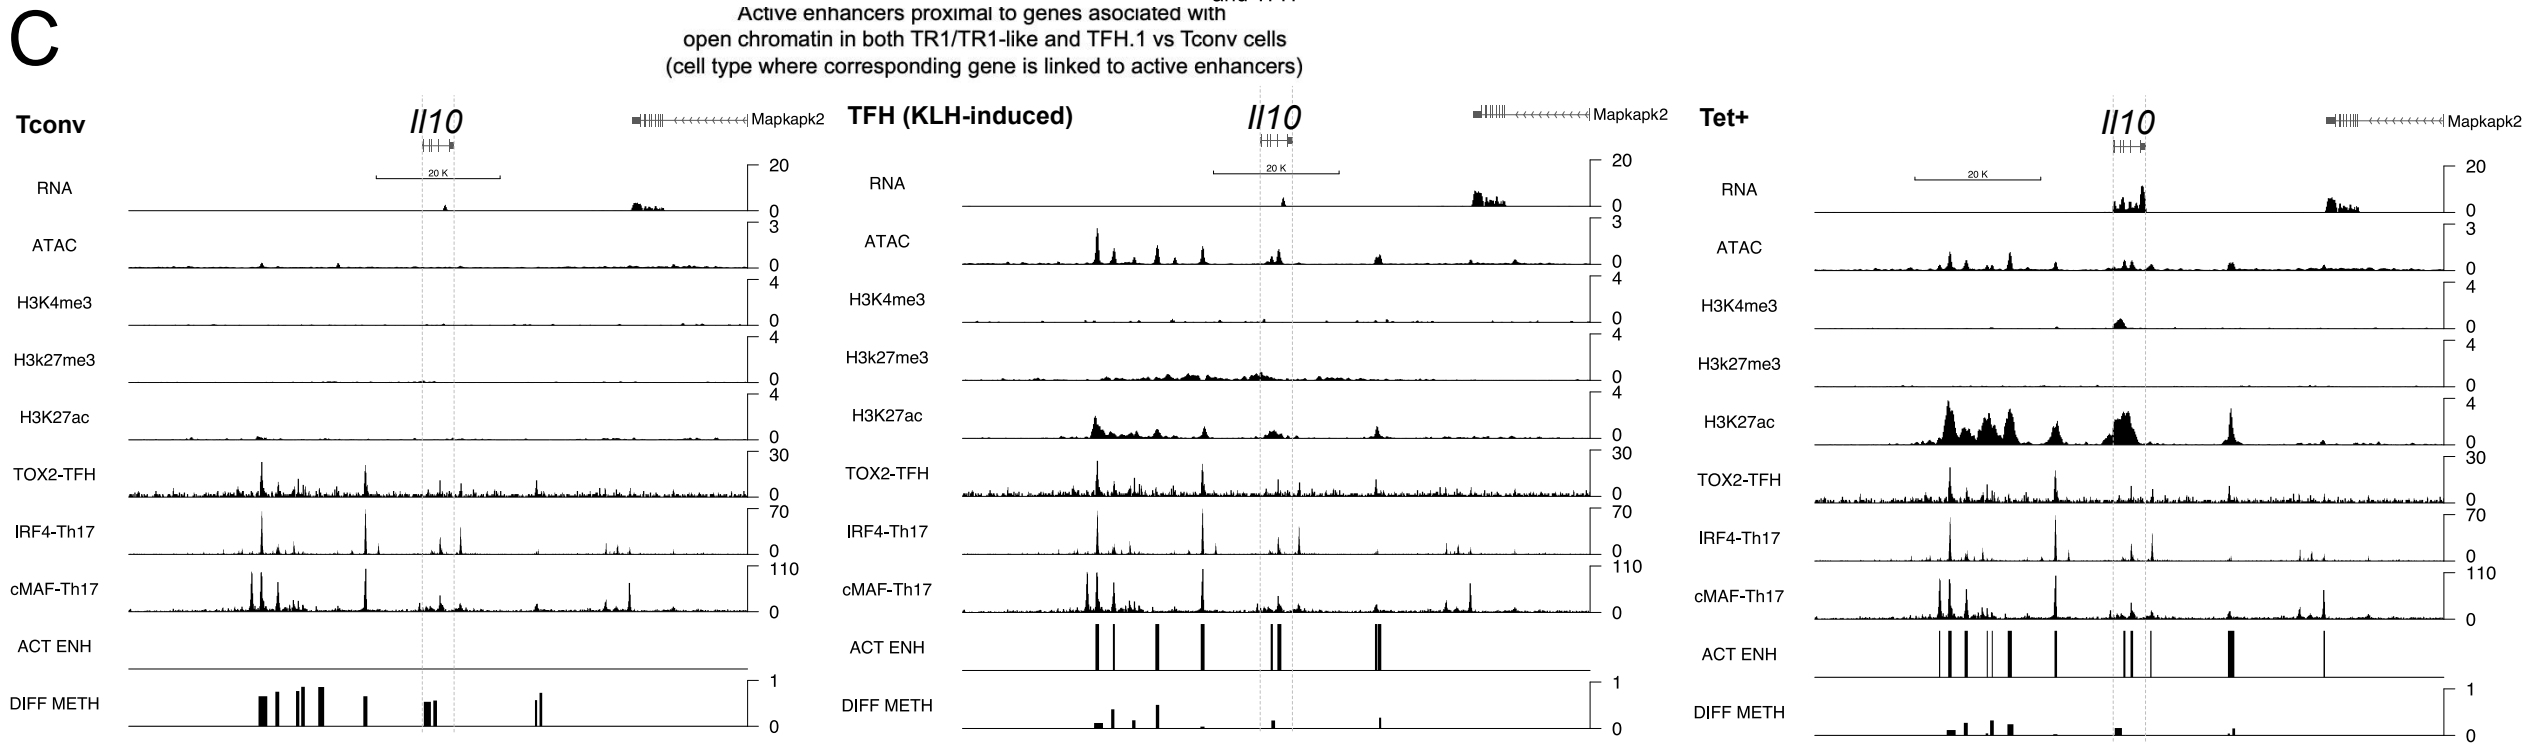

Supplement: fig4-data1 [file elife-97665-fig4-data1-v1.pdf]
