# Supplementary material for: T-follicular helper cells are epigenetically poised to transdifferentiate into T-regulatory type 1 cells
Source: eLife. 2024 Nov 22;13:RP97665. doi: 10.7554/eLife.97665 (PMC11584177; doi:10.7554/eLife.97665)
Supplement: Figure 2—source data 1. [file elife-97665-fig2-data1.xlsx]

## Sheet: Sheet1
gene_name	pvalue	fdr	fold	seqnames	start	end	width	strand	Conc	Conc_Tet	Conc_TH0	Fold	p.value	FDR	annotation	geneChr	geneStart	geneEnd	geneLength	geneStrand	geneId	distanceToTSS	ENSEMBL	SYMBOL	GENENAME	flank_geneIds	flank_gene_distances	id	comparison	status	Conc_TFH
Osbpl3	1.86931e-261	1.02089e-258	31.4365	chr6	50393961	50394361	401	*	4.5849	5.32172	1.41778	2.77784	7.46069e-09	3.87623e-07	Intron (ENSMUST00000071728.10/71720, intron 2 of 21)	6	50293330	50456201	162872	2	71720	61840	ENSMUSG00000029822	Osbpl3	oxysterol binding protein-like 3	71720	0	chr6:50393961-50394361	Tet_TH0	Closed
Osbpl3	1.86931e-261	1.02089e-258	31.4365	chr6	50390302	50390702	401	*	4.11018	4.7592	2.06639	2.12426	1.83446e-06	3.8483e-05	Intron (ENSMUST00000071728.10/71720, intron 2 of 21)	6	50293330	50456201	162872	2	71720	65499	ENSMUSG00000029822	Osbpl3	oxysterol binding protein-like 3	71720	0	chr6:50390302-50390702	Tet_TH0	Closed
Endod1	0	0	29.4254																										Tet_TH0
Bach2	5.9407e-164	1.14155e-161	-6.56994	chr4	32126830	32127230	401	*	4.71209	5.43267	1.836	2.75767	1.1011e-09	7.86917e-08	Distal Intergenic	4	32238804	32586108	347305	1	12014	-111574	ENSMUSG00000040270	Bach2	BTB and CNC homology, basic leucine zipper transcription factor 2			chr4:32126830-32127230	Tet_TH0	Closed
Bach2	5.9407e-164	1.14155e-161	-6.56994	chr4	32179718	32180118	401	*	2.78718	3.51719	0	2.00992	0.000171551	0.00173181	Distal Intergenic	4	32238804	32586108	347305	1	12014	-58686	ENSMUSG00000040270	Bach2	BTB and CNC homology, basic leucine zipper transcription factor 2			chr4:32179718-32180118	Tet_TH0	Closed
Bach2	5.9407e-164	1.14155e-161	-6.56994	chr4	32137905	32138305	401	*	3.2362	3.8085	1.72495	1.69079	0.000311378	0.00284586	Distal Intergenic	4	32238804	32586108	347305	1	12014	-100499	ENSMUSG00000040270	Bach2	BTB and CNC homology, basic leucine zipper transcription factor 2			chr4:32137905-32138305	Tet_TH0	Closed
Bach2	5.9407e-164	1.14155e-161	-6.56994	chr4	32217563	32217963	401	*	3.94924	4.44628	2.8023	1.35267	0.000920036	0.00702979	Distal Intergenic	4	32238804	32586108	347305	1	12014	-20841	ENSMUSG00000040270	Bach2	BTB and CNC homology, basic leucine zipper transcription factor 2	12014	0	chr4:32217563-32217963	Tet_TH0	Closed
Bach2	5.9407e-164	1.14155e-161	-6.56994	chr4	32343758	32344158	401	*	5.99135	3.56907	7.05111	-3.05339	7.30952e-18	1.19673e-14	Intron (ENSMUST00000108180.8/12014, intron 2 of 6)	4	32238804	32586108	347305	1	12014	104954	ENSMUSG00000040270	Bach2	BTB and CNC homology, basic leucine zipper transcription factor 2	12014	0	chr4:32343758-32344158	Tet_TH0	Open
Bach2	5.9407e-164	1.14155e-161	-6.56994	chr4	32363646	32364046	401	*	5.49624	3.73251	6.45281	-2.4625	1.00632e-15	7.55139e-13	Intron (ENSMUST00000108180.8/12014, intron 2 of 6)	4	32238804	32586108	347305	1	12014	124842	ENSMUSG00000040270	Bach2	BTB and CNC homology, basic leucine zipper transcription factor 2	12014	0	chr4:32363646-32364046	Tet_TH0	Open
Bach2	5.9407e-164	1.14155e-161	-6.56994	chr4	32291460	32291860	401	*	6.00515	4.35874	6.93678	-2.30592	7.60375e-13	1.67e-10	Intron (ENSMUST00000108180.8/12014, intron 1 of 6)	4	32238804	32586108	347305	1	12014	52656	ENSMUSG00000040270	Bach2	BTB and CNC homology, basic leucine zipper transcription factor 2	12014	0	chr4:32291460-32291860	Tet_TH0	Open
Bach2	5.9407e-164	1.14155e-161	-6.56994	chr4	32351276	32351676	401	*	4.59047	3.44626	5.38131	-1.70199	1.89219e-07	5.68429e-06	Intron (ENSMUST00000108180.8/12014, intron 2 of 6)	4	32238804	32586108	347305	1	12014	112472	ENSMUSG00000040270	Bach2	BTB and CNC homology, basic leucine zipper transcription factor 2	12014	0	chr4:32351276-32351676	Tet_TH0	Open
Bach2	5.9407e-164	1.14155e-161	-6.56994	chr4	32335678	32336078	401	*	5.81815	4.70096	6.59946	-1.67892	4.3362e-07	1.14338e-05	Intron (ENSMUST00000108180.8/12014, intron 2 of 6)	4	32238804	32586108	347305	1	12014	96874	ENSMUSG00000040270	Bach2	BTB and CNC homology, basic leucine zipper transcription factor 2	12014	0	chr4:32335678-32336078	Tet_TH0	Open
Bach2	5.9407e-164	1.14155e-161	-6.56994	chr4	32351856	32352256	401	*	4.64967	3.54427	5.42673	-1.6438	7.39396e-07	1.79826e-05	Intron (ENSMUST00000108180.8/12014, intron 2 of 6)	4	32238804	32586108	347305	1	12014	113052	ENSMUSG00000040270	Bach2	BTB and CNC homology, basic leucine zipper transcription factor 2	12014	0	chr4:32351856-32352256	Tet_TH0	Open
Bach2	5.9407e-164	1.14155e-161	-6.56994	chr4	32393209	32393609	401	*	3.77553	2.41129	4.63583	-1.88445	1.59936e-06	3.43104e-05	Intron (ENSMUST00000108180.8/12014, intron 2 of 6)	4	32238804	32586108	347305	1	12014	154405	ENSMUSG00000040270	Bach2	BTB and CNC homology, basic leucine zipper transcription factor 2	12014	0	chr4:32393209-32393609	Tet_TH0	Open
Bach2	5.9407e-164	1.14155e-161	-6.56994	chr4	32349378	32349778	401	*	3.70267	2.2606	4.58442	-1.94385	3.69763e-06	6.995e-05	Intron (ENSMUST00000108180.8/12014, intron 2 of 6)	4	32238804	32586108	347305	1	12014	110574	ENSMUSG00000040270	Bach2	BTB and CNC homology, basic leucine zipper transcription factor 2	12014	0	chr4:32349378-32349778	Tet_TH0	Open
Bach2	5.9407e-164	1.14155e-161	-6.56994	chr4	32394865	32395265	401	*	3.63205	2.1721	4.51852	-1.90102	5.95632e-06	0.000104045	Intron (ENSMUST00000108180.8/12014, intron 2 of 6)	4	32238804	32586108	347305	1	12014	156061	ENSMUSG00000040270	Bach2	BTB and CNC homology, basic leucine zipper transcription factor 2	12014	0	chr4:32394865-32395265	Tet_TH0	Open
Bach2	5.9407e-164	1.14155e-161	-6.56994	chr4	32160776	32161176	401	*	4.00975	2.8995	4.78856	-1.59924	1.43233e-05	0.000217263	Distal Intergenic	4	32238804	32586108	347305	1	12014	-77628	ENSMUSG00000040270	Bach2	BTB and CNC homology, basic leucine zipper transcription factor 2			chr4:32160776-32161176	Tet_TH0	Open
Bach2	5.9407e-164	1.14155e-161	-6.56994	chr4	32307236	32307636	401	*	4.21215	3.14995	4.97326	-1.53785	2.30252e-05	0.000325233	Intron (ENSMUST00000108180.8/12014, intron 1 of 6)	4	32238804	32586108	347305	1	12014	68432	ENSMUSG00000040270	Bach2	BTB and CNC homology, basic leucine zipper transcription factor 2	12014	0	chr4:32307236-32307636	Tet_TH0	Open
Bach2	5.9407e-164	1.14155e-161	-6.56994	chr4	32328536	32328936	401	*	3.74337	2.68032	4.5048	-1.56959	5.74955e-05	0.000700349	Intron (ENSMUST00000108180.8/12014, intron 2 of 6)	4	32238804	32586108	347305	1	12014	89732	ENSMUSG00000040270	Bach2	BTB and CNC homology, basic leucine zipper transcription factor 2	12014	0	chr4:32328536-32328936	Tet_TH0	Open
Bach2	5.9407e-164	1.14155e-161	-6.56994	chr4	32388659	32389059	401	*	3.82954	2.80538	4.57606	-1.48808	7.13431e-05	0.00084225	Intron (ENSMUST00000108180.8/12014, intron 2 of 6)	4	32238804	32586108	347305	1	12014	149855	ENSMUSG00000040270	Bach2	BTB and CNC homology, basic leucine zipper transcription factor 2	12014	0	chr4:32388659-32389059	Tet_TH0	Open
Bach2	5.9407e-164	1.14155e-161	-6.56994	chr4	32239573	32239973	401	*	5.49007	4.89599	6.02617	-1.0424	0.000113143	0.00123644	Promoter (<=1kb)	4	32238804	32586108	347305	1	12014	769	ENSMUSG00000040270	Bach2	BTB and CNC homology, basic leucine zipper transcription factor 2	12014	0	chr4:32239573-32239973	Tet_TH0	Open
Bach2	5.9407e-164	1.14155e-161	-6.56994	chr4	32280410	32280810	401	*	3.98273	3.02481	4.70252	-1.34505	0.000331439	0.00299802	Intron (ENSMUST00000108180.8/12014, intron 1 of 6)	4	32238804	32586108	347305	1	12014	41606	ENSMUSG00000040270	Bach2	BTB and CNC homology, basic leucine zipper transcription factor 2	12014	0	chr4:32280410-32280810	Tet_TH0	Open
Bach2	5.9407e-164	1.14155e-161	-6.56994	chr4	32216436	32216836	401	*	3.65687	2.83319	4.31679	-1.19066	0.000928277	0.00707482	Distal Intergenic	4	32238804	32586108	347305	1	12014	-21968	ENSMUSG00000040270	Bach2	BTB and CNC homology, basic leucine zipper transcription factor 2	12014	0	chr4:32216436-32216836	Tet_TH0	Open
Ptpn13	0	0	29.2325	chr5	103442136	103442536	401	*	4.51979	5.22422	1.8819	2.74487	2.11817e-09	1.37468e-07	Intron (ENSMUST00000199412.4/19249, intron 1 of 17)	5	103425192	103598303	173112	1	19249	16944	ENSMUSG00000034573	Ptpn13	protein tyrosine phosphatase, non-receptor type 13	19249	0	chr5:103442136-103442536	Tet_TH0	Closed
Ptpn13	0	0	29.2325	chr5	103519076	103519476	401	*	4.49655	5.23355	1.3259	2.95482	3.83564e-09	2.2105e-07	Intron (ENSMUST00000199412.4/19249, intron 9 of 17)	5	103425192	103598303	173112	1	19249	93884	ENSMUSG00000034573	Ptpn13	protein tyrosine phosphatase, non-receptor type 13	19249	0	chr5:103519076-103519476	Tet_TH0	Closed
Ptpn13	0	0	29.2325	chr5	103404575	103404975	401	*	4.28446	4.81778	2.97565	1.59226	1.80745e-05	0.000264537	Distal Intergenic	5	103425192	103598303	173112	1	19249	-20217	ENSMUSG00000034573	Ptpn13	protein tyrosine phosphatase, non-receptor type 13	19249	0	chr5:103404575-103404975	Tet_TH0	Closed
Ptpn13	0	0	29.2325	chr5	103424936	103425336	401	*	5.78742	6.28284	4.64718	1.47234	3.51575e-05	0.000464371	Promoter (<=1kb)	5	103425192	103598303	173112	1	19249	0	ENSMUSG00000034573	Ptpn13	protein tyrosine phosphatase, non-receptor type 13	19249	0	chr5:103424936-103425336	Tet_TH0	Closed
Ksr1	0	0	7.97571	chr11	79129903	79130303	401	*	4.57625	5.15053	3.05376	1.83654	2.32258e-06	4.71307e-05	Intron (ENSMUST00000018478.10/16706, intron 1 of 18)	11	79013440	79146407	132968	2	16706	16104	ENSMUSG00000018334	Ksr1	kinase suppressor of ras 1	16706	0	chr11:79129903-79130303	Tet_TH0	Closed
Ksr1	0	0	7.97571	chr11	79131901	79132301	401	*	4.90802	5.3805	3.85913	1.34641	0.000130747	0.00138919	Intron (ENSMUST00000018478.10/16706, intron 1 of 18)	11	79013440	79146407	132968	2	16706	14106	ENSMUSG00000018334	Ksr1	kinase suppressor of ras 1	16706	0	chr11:79131901-79132301	Tet_TH0	Closed
Tiam1	0	0	29.3087	chr16	89986007	89986407	401	*	5.10953	4.00441	5.88649	-1.69119	7.03989e-08	2.49413e-06	Intron (ENSMUST00000114124.8/21844, intron 2 of 11)	16	89787111	90143769	356659	2	21844	157362	ENSMUSG00000002489	Tiam1	T cell lymphoma invasion and metastasis 1	21844	0	chr16:89986007-89986407	Tet_TH0	Open
Tiam1	0	0	29.3087	chr16	89938295	89938695	401	*	4.66723	3.77418	5.3591	-1.42727	5.16991e-06	9.26903e-05	Intron (ENSMUST00000163370.7/21844, intron 2 of 27)	16	89787111	90143769	356659	2	21844	205074	ENSMUSG00000002489	Tiam1	T cell lymphoma invasion and metastasis 1	21844	0	chr16:89938295-89938695	Tet_TH0	Open
Tiam1	0	0	29.3087	chr16	90042382	90042782	401	*	4.11836	2.913	4.92993	-1.68736	1.0885e-05	0.000172997	Intron (ENSMUST00000114124.8/21844, intron 2 of 11)	16	89787111	90143769	356659	2	21844	100987	ENSMUSG00000002489	Tiam1	T cell lymphoma invasion and metastasis 1	21844	0	chr16:90042382-90042782	Tet_TH0	Open
Pdcd1	0	0	168.572	chr1	94046455	94046855	401	*	3.73871	4.46112	0.832813	2.11534	7.24118e-05	0.000851797	Intron (ENSMUST00000027507.7/18566, intron 1 of 4)	1	94038305	94052553	14249	2	18566	5698	ENSMUSG00000026285	Pdcd1	programmed cell death 1	619597;241159;18566	0;0;0	chr1:94046455-94046855	Tet_TH0	Closed
Pdcd1	0	0	168.572	chr1	94042190	94042590	401	*	4.00048	4.49378	2.86901	1.40643	0.000183292	0.00183186	Intron (ENSMUST00000027507.7/18566, intron 1 of 4)	1	94038305	94052553	14249	2	18566	9963	ENSMUSG00000026285	Pdcd1	programmed cell death 1	619597;241159;18566	0;0;0	chr1:94042190-94042590	Tet_TH0	Closed
Pdcd1	0	0	168.572	chr1	94091756	94092156	401	*	5.84935	5.16701	6.43667	-1.12498	0.000315067	0.00287229	Distal Intergenic	1	94038305	94052553	14249	2	18566	-39203	ENSMUSG00000026285	Pdcd1	programmed cell death 1	18566	0	chr1:94091756-94092156	Tet_TH0	Open
Nav2	9.60654e-218	3.43732e-215	8.70221	chr7	48937554	48937954	401	*	4.5737	3.8917	5.16084	-1.06432	0.00101604	0.00764344	Intron (ENSMUST00000184336.1/78286, intron 3 of 4)	7	48908716	49610090	701375	1	78286	28838	ENSMUSG00000052512	Nav2	neuron navigator 2	78286	0	chr7:48937554-48937954	Tet_TH0	Open
Syt11	0	0	8.78686																										Tet_TH0
Tnfsf11	0	0	108.471																										Tet_TH0
Lrig1	0	0	12.0259	chr6	94778753	94779153	401	*	3.21304	2.00287	4.02619	-1.58105	0.000167467	0.00170107	Distal Intergenic	6	94604529	94700158	95630	2	16206	-78595	ENSMUSG00000030029	Lrig1	leucine-rich repeats and immunoglobulin-like domains 1			chr6:94778753-94779153	Tet_TH0	Open
Arl4c	2.07673e-183	5.0704e-181	-5.14511	chr1	88656064	88656464	401	*	4.34815	2.73646	5.2719	-2.23188	5.65752e-10	4.51836e-08	Exon (ENSMUST00000186042.1/ENSMUST00000186042.1, exon 1 of 2)	1	88698225	88702221	3997	2	320982	45757	ENSMUSG00000049866	Arl4c	ADP-ribosylation factor-like 4C	320982	0	chr1:88656064-88656464	Tet_TH0	Open
Arl4c	2.07673e-183	5.0704e-181	-5.14511	chr1	88644476	88644876	401	*	4.40646	2.83956	5.31972	-2.10798	5.11943e-09	2.82463e-07	Distal Intergenic	1	88698225	88702221	3997	2	320982	57345	ENSMUSG00000049866	Arl4c	ADP-ribosylation factor-like 4C			chr1:88644476-88644876	Tet_TH0	Open
Arl4c	2.07673e-183	5.0704e-181	-5.14511	chr1	88720643	88721043	401	*	4.75677	3.48374	5.58995	-1.83957	5.33236e-08	1.97193e-06	Distal Intergenic	1	88698225	88702221	3997	2	320982	-18422	ENSMUSG00000049866	Arl4c	ADP-ribosylation factor-like 4C	320982;78650	0;-33847	chr1:88720643-88721043	Tet_TH0	Open
Arl4c	2.07673e-183	5.0704e-181	-5.14511	chr1	88654767	88655167	401	*	6.15587	5.09992	6.91461	-1.61475	5.98354e-07	1.50234e-05	Exon (ENSMUST00000194311.1/ENSMUST00000194311.1, exon 1 of 1)	1	88698225	88702221	3997	2	320982	47054	ENSMUSG00000049866	Arl4c	ADP-ribosylation factor-like 4C	320982	0	chr1:88654767-88655167	Tet_TH0	Open
Arl4c	2.07673e-183	5.0704e-181	-5.14511	chr1	88661195	88661595	401	*	3.72066	2.58141	4.50977	-1.62785	2.11122e-05	0.000301506	Distal Intergenic	1	88698225	88702221	3997	2	320982	40626	ENSMUSG00000049866	Arl4c	ADP-ribosylation factor-like 4C	320982	0	chr1:88661195-88661595	Tet_TH0	Open
Arl4c	2.07673e-183	5.0704e-181	-5.14511	chr1	88636571	88636971	401	*	3.51289	2.66909	4.18231	-1.21734	0.00118639	0.0086538	Distal Intergenic	1	88698225	88702221	3997	2	320982	65250	ENSMUSG00000049866	Arl4c	ADP-ribosylation factor-like 4C			chr1:88636571-88636971	Tet_TH0	Open
Itgb1	0	0	31.9391	chr8	128549730	128550130	401	*	5.46403	6.20012	2.31149	3.23509	4.58716e-13	1.11639e-10	Distal Intergenic	8	128685654	128733200	47547	1	16412	-135524	ENSMUSG00000025809	Itgb1	integrin beta 1 (fibronectin receptor beta)	18186	0	chr8:128549730-128550130	Tet_TH0	Closed
Itgb1	0	0	31.9391	chr8	128534333	128534733	401	*	4.06075	4.75928	1.50035	2.53134	3.17121e-08	1.27767e-06	Distal Intergenic	8	128685654	128733200	47547	1	16412	-150921	ENSMUSG00000025809	Itgb1	integrin beta 1 (fibronectin receptor beta)	18186	0	chr8:128534333-128534733	Tet_TH0	Closed
Itgb1	0	0	31.9391	chr8	128535663	128536063	401	*	4.27015	4.93282	2.10297	2.35615	8.80754e-08	3.00131e-06	Distal Intergenic	8	128685654	128733200	47547	1	16412	-149591	ENSMUSG00000025809	Itgb1	integrin beta 1 (fibronectin receptor beta)	18186	0	chr8:128535663-128536063	Tet_TH0	Closed
Itgb1	0	0	31.9391	chr8	128552194	128552594	401	*	4.09352	4.69339	2.41576	1.68353	0.0004227	0.00368026	Distal Intergenic	8	128685654	128733200	47547	1	16412	-133060	ENSMUSG00000025809	Itgb1	integrin beta 1 (fibronectin receptor beta)	18186	0	chr8:128552194-128552594	Tet_TH0	Closed
Maf	0	0	119.263	chr8	115742635	115743035	401	*	5.12295	5.79141	2.89975	2.40522	2.95251e-08	1.20301e-06	Distal Intergenic	8	115701435	115707794	6360	2	17132	-34841	ENSMUSG00000055435	Maf	avian musculoaponeurotic fibrosarcoma oncogene homolog	17132	0	chr8:115742635-115743035	Tet_TH0	Closed
Maf	0	0	119.263	chr8	115506746	115507146	401	*	4.53253	5.09901	3.05376	1.80382	2.23949e-06	4.57021e-05	Distal Intergenic	8	115701435	115707794	6360	2	17132	200648	ENSMUSG00000055435	Maf	avian musculoaponeurotic fibrosarcoma oncogene homolog			chr8:115506746-115507146	Tet_TH0	Closed
Maf	0	0	119.263	chr8	115226898	115227298	401	*	3.7933	4.39134	2.12729	1.78569	2.8958e-05	0.000394089	Intron (ENSMUST00000004756.13/80707, intron 8 of 8)	8	115701435	115707794	6360	2	17132	480496	ENSMUSG00000055435	Maf	avian musculoaponeurotic fibrosarcoma oncogene homolog	80707	0	chr8:115226898-115227298	Tet_TH0	Closed
Maf	0	0	119.263	chr8	115237002	115237402	401	*	3.18563	3.79383	1.45276	1.83679	0.000109754	0.00120344	Intron (ENSMUST00000004756.13/80707, intron 8 of 8)	8	115701435	115707794	6360	2	17132	470392	ENSMUSG00000055435	Maf	avian musculoaponeurotic fibrosarcoma oncogene homolog	80707	0	chr8:115237002-115237402	Tet_TH0	Closed
Maf	0	0	119.263	chr8	115726801	115727201	401	*	4.07491	4.56747	2.94649	1.31149	0.000492918	0.00417162	Distal Intergenic	8	115701435	115707794	6360	2	17132	-19007	ENSMUSG00000055435	Maf	avian musculoaponeurotic fibrosarcoma oncogene homolog	17132	0	chr8:115726801-115727201	Tet_TH0	Closed
Maf	0	0	119.263	chr8	115531276	115531676	401	*	3.47687	4.0191	2.12469	1.38229	0.000907332	0.00694458	Distal Intergenic	8	115701435	115707794	6360	2	17132	176118	ENSMUSG00000055435	Maf	avian musculoaponeurotic fibrosarcoma oncogene homolog			chr8:115531276-115531676	Tet_TH0	Closed
Maf	0	0	119.263	chr8	115385724	115386124	401	*	3.49024	4.10681	1.69954	1.57942	0.00133474	0.00954649	Distal Intergenic	8	115701435	115707794	6360	2	17132	321670	ENSMUSG00000055435	Maf	avian musculoaponeurotic fibrosarcoma oncogene homolog	80707	0	chr8:115385724-115386124	Tet_TH0	Closed
Maf	0	0	119.263	chr8	115400059	115400459	401	*	5.49467	4.91383	6.02264	-0.953277	0.00116309	0.00851007	Distal Intergenic	8	115701435	115707794	6360	2	17132	307335	ENSMUSG00000055435	Maf	avian musculoaponeurotic fibrosarcoma oncogene homolog	80707	0	chr8:115400059-115400459	Tet_TH0	Open
Slc22a15	0	0	75.4151	chr3	101948572	101948972	401	*	4.68009	5.43541	1.08346	2.72297	4.70202e-07	1.22844e-05	Distal Intergenic	3	101855776	101924453	68678	2	242126	-24119	ENSMUSG00000033147	Slc22a15	solute carrier family 22 (organic anion/cation transporter), member 15	242126	0	chr3:101948572-101948972	Tet_TH0	Closed
Slc22a15	0	0	75.4151	chr3	101914293	101914693	401	*	3.27487	3.98248	0.593383	2.30551	1.06907e-05	0.000170459	Intron (ENSMUST00000106928.9/242126, intron 2 of 11)	3	101855776	101924453	68678	2	242126	9760	ENSMUSG00000033147	Slc22a15	solute carrier family 22 (organic anion/cation transporter), member 15	242126	0	chr3:101914293-101914693	Tet_TH0	Closed
Tbc1d4	0	0	35.8471	chr14	101480561	101480961	401	*	4.72994	5.31825	3.12476	1.6318	0.000541936	0.00451121	Intron (ENSMUST00000161991.7/210789, intron 8 of 18)	14	101442360	101609191	166832	2	210789	128230	ENSMUSG00000033083	Tbc1d4	TBC1 domain family, member 4	210789	0	chr14:101480561-101480961	Tet_TH0	Closed
Tbc1d4	0	0	35.8471	chr14	101452925	101453325	401	*	4.27557	4.71969	3.33037	1.27704	0.000632874	0.00513759	Intron (ENSMUST00000161991.7/210789, intron 15 of 18)	14	101442360	101609191	166832	2	210789	155866	ENSMUSG00000033083	Tbc1d4	TBC1 domain family, member 4	210789	0	chr14:101452925-101453325	Tet_TH0	Closed
B4galnt4	2.81046e-253	1.42257e-250	63.268																										Tet_TH0
Serinc5	0	0	8.12389	chr13	92629653	92630053	401	*	3.32254	3.90714	1.73975	1.5996	0.000393953	0.00346692	Intron (ENSMUST00000049488.8/218442, intron 1 of 11)	13	92611091	92711947	100857	1	218442	18562	ENSMUSG00000021703	Serinc5	serine incorporator 5	218442	0	chr13:92629653-92630053	Tet_TH0	Closed
Pou2af1	0	0	12.8218																										Tet_TH0
Izumo1r	0	0	13.9821																										Tet_TH0
Nt5e	0	0	14.893	chr9	88332505	88332905	401	*	4.13121	4.77904	2.09767	2.10577	9.04024e-07	2.12269e-05	Intron (ENSMUST00000034992.7/23959, intron 1 of 8)	9	88327197	88372092	44896	1	23959	5308	ENSMUSG00000032420	Nt5e	5' nucleotidase, ecto	23959;244962	0;0	chr9:88332505-88332905	Tet_TH0	Closed
Cxxc5	3.22514e-284	2.09161e-281	59.142																										Tet_TH0
S1pr2	1.78222e-278	1.08783e-275	17.3246																										Tet_TH0
Asb2	1.27181e-216	4.39899e-214	167.777																										Tet_TH0
Gpm6b	0	0	395.253																										Tet_TH0
Spock2	0	0	181.955																										Tet_TH0
Fam43a	7.73373e-303	5.34994e-300	220.664	chr16	30678910	30679310	401	*	4.17079	4.92745	0.53712	2.42908	9.09867e-06	0.000148696	Distal Intergenic	16	30599723	30602797	3075	1	224093	79187	ENSMUSG00000046546	Fam43a	family with sequence similarity 43, member A			chr16:30678910-30679310	Tet_TH0	Closed
Fam43a	7.73373e-303	5.34994e-300	220.664	chr16	30599522	30599922	401	*	4.69576	5.13661	3.76195	1.18926	0.000237402	0.00227057	Promoter (<=1kb)	16	30599723	30602797	3075	1	224093	0	ENSMUSG00000046546	Fam43a	family with sequence similarity 43, member A	224090;224092;224093	0;0;0	chr16:30599522-30599922	Tet_TH0	Closed
Nrp1	0	0	69.8937																										Tet_TH0
Trim8	1.22011e-307	9.37813e-305	4.09771																										Tet_TH0
Trerf1	1.40581e-175	3.17118e-173	5.071																										Tet_TH0
Atp1a3	1.52716e-171	3.16931e-169	47.1185	chr7	25000687	25001087	401	*	3.97788	3.16341	4.6334	-1.26657	0.000272511	0.00254487	Exon (ENSMUST00000102858.9/232975, exon 2 of 22)	7	24978167	25005958	27792	2	232975	4871	ENSMUSG00000040907	Atp1a3	ATPase, Na+/K+ transporting, alpha 3 polypeptide	14470;102465633;232975;102465634;14809	0;-30612;0;-13020;71259	chr7:25000687-25001087	Tet_TH0	Open
Anxa2	1.0331e-155	1.83248e-153	10.6699																										Tet_TH0
Tox2	1.88368e-240	8.31744e-238	992.487	chr2	163298935	163299335	401	*	2.99203	3.70125	0.28766	2.08019	6.70429e-05	0.000799344	Intron (ENSMUST00000109428.8/269389, intron 3 of 8)	2	163203125	163324170	121046	1	269389	95810	ENSMUSG00000074607	Tox2	TOX high mobility group box family member 2	269389;59091	0;98658	chr2:163298935-163299335	Tet_TH0	Closed
Tox2	1.88368e-240	8.31744e-238	992.487	chr2	163166125	163166525	401	*	3.76091	4.26934	2.56553	1.34617	0.000499719	0.00422323	Distal Intergenic	2	163203125	163324170	121046	1	269389	-36600	ENSMUSG00000074607	Tox2	TOX high mobility group box family member 2	269389	0	chr2:163166125-163166525	Tet_TH0	Closed
Bcl2	1.44221e-303	1.03208e-300	-5.56412	chr1	106688041	106688441	401	*	4.55118	3.75094	5.1998	-1.21301	0.000257295	0.00243051	Intron (ENSMUST00000112751.1/12043, intron 1 of 1)	1	106538178	106714274	176097	2	12043	25833	ENSMUSG00000057329	Bcl2	B cell leukemia/lymphoma 2	12043;70750	0;0	chr1:106688041-106688441	Tet_TH0	Open
Art2b	1.47568e-161	2.75899e-159	5.79853																										Tet_TH0
Icos	2.33419e-261	1.24209e-258	13.9126	chr1	61035302	61035702	401	*	3.42884	3.96389	2.11175	1.32924	0.00114493	0.00841274	Distal Intergenic	1	60977927	61000320	22394	1	54167	57375	ENSMUSG00000026009	Icos	inducible T cell co-stimulator	54167	0	chr1:61035302-61035702	Tet_TH0	Closed
Samsn1	7.66914e-242	3.45995e-239	7.30667																										Tet_TH0
Ptprj	2.10028e-232	8.54648e-230	44.2573	chr2	90528068	90528468	401	*	2.74283	3.33449	1.11699	1.54922	0.00124098	0.00898107	Intron (ENSMUST00000168621.2/19271, intron 1 of 23)	2	90429754	90580647	150894	2	19271	52179	ENSMUSG00000025314	Ptprj	protein tyrosine phosphatase, receptor type, J	19271	0	chr2:90528068-90528468	Tet_TH0	Closed
Zdhhc2	1.44213e-199	4.0444e-197	20.6287	chr8	40422282	40422682	401	*	3.81429	4.4801	1.61701	2.28541	8.62826e-07	2.04327e-05	Promoter (1-2kb)	8	40423815	40510266	86452	1	70546	-1133	ENSMUSG00000039470	Zdhhc2	zinc finger, DHHC domain containing 2	78506;70546	0;0	chr8:40422282-40422682	Tet_TH0	Closed
Egln3	7.42151e-210	2.26498e-207	29.9966																										Tet_TH0
Ikzf2	5.94733e-253	2.93869e-250	33.8283	chr1	69544212	69544612	401	*	5.08646	5.78396	2.53918	2.7444	3.63347e-10	3.05067e-08	Intron (ENSMUST00000187100.1/ENSMUST00000187100.1, intron 3 of 3)	1	69531214	69687245	156032	2	22779	142633	ENSMUSG00000025997	Ikzf2	IKAROS family zinc finger 2	22779	0	chr1:69544212-69544612	Tet_TH0	Closed
Ikzf2	5.94733e-253	2.93869e-250	33.8283	chr1	69537583	69537983	401	*	3.89709	4.47173	2.37257	1.71245	3.03714e-05	0.000410949	3' UTR	1	69531214	69687245	156032	2	22779	149262	ENSMUSG00000025997	Ikzf2	IKAROS family zinc finger 2	22779	0	chr1:69537583-69537983	Tet_TH0	Closed
Ikzf2	5.94733e-253	2.93869e-250	33.8283	chr1	69555629	69556029	401	*	3.60727	4.17332	2.13088	1.59609	0.000161418	0.0016494	Intron (ENSMUST00000027146.8/22779, intron 5 of 7)	1	69531214	69687245	156032	2	22779	131216	ENSMUSG00000025997	Ikzf2	IKAROS family zinc finger 2	22779	0	chr1:69555629-69556029	Tet_TH0	Closed
Ikzf2	5.94733e-253	2.93869e-250	33.8283	chr1	69548423	69548823	401	*	3.39205	3.89802	2.20731	1.32168	0.00137317	0.0097651	Exon (ENSMUST00000027146.8/22779, exon 6 of 8)	1	69531214	69687245	156032	2	22779	138422	ENSMUSG00000025997	Ikzf2	IKAROS family zinc finger 2	22779	0	chr1:69548423-69548823	Tet_TH0	Closed
Bcl2a1b	2.17402e-246	1.0254e-243	20.8064																										Tet_TH0
Cxcr5	6.66274e-196	1.77272e-193	203.756	chr9	44526252	44526652	401	*	4.00281	4.60988	2.27755	1.87925	9.07216e-06	0.000148444	5' UTR	9	44511787	44561877	50091	2	12145	35225	ENSMUSG00000047880	Cxcr5	chemokine (C-X-C motif) receptor 5	80288;12145	0;0	chr9:44526252-44526652	Tet_TH0	Closed
Cxcr5	6.66274e-196	1.77272e-193	203.756	chr9	44533083	44533483	401	*	5.90997	5.03448	6.59396	-1.36121	7.025e-05	0.000831693	Intron (ENSMUST00000215293.1/12145, intron 2 of 3)	9	44511787	44561877	50091	2	12145	28394	ENSMUSG00000047880	Cxcr5	chemokine (C-X-C motif) receptor 5	80288;12145	0;0	chr9:44533083-44533483	Tet_TH0	Open
Cyfip1	4.71053e-217	1.65691e-214	22.1821																										Tet_TH0
Rnf144a	6.50655e-149	1.02296e-146	13.5196																										Tet_TH0
Bcl6	9.53604e-167	1.92137e-164	14.0382	chr16	23991192	23991592	401	*	4.12267	3.46592	4.69565	-1.0767	0.000885264	0.00680356	Distal Intergenic	16	23965052	23988852	23801	2	12053	-2340	ENSMUSG00000022508	Bcl6	B cell leukemia/lymphoma 6	12053	0	chr16:23991192-23991592	Tet_TH0	Open
St3gal2	4.5812e-157	8.33979e-155	6.11167																										Tet_TH0
Adap1	8.31104e-137	1.13473e-134	12.401																										Tet_TH0
Mapre2	1.20338e-198	3.32983e-196	5.04601																										Tet_TH0
Tnfsf14	1.30362e-181	3.07433e-179	69.9544																										Tet_TH0
Hif1a	2.06805e-122	2.33251e-120	7.72565	chr12	73755607	73756007	401	*	3.89608	4.44175	2.52676	1.71245	2.92871e-05	0.000397773	Intron (ENSMUST00000221153.1/18755, intron 11 of 14)	12	73901375	73947530	46156	1	15251	-145368	ENSMUSG00000021109	Hif1a	hypoxia inducible factor 1, alpha subunit	18755	0	chr12:73755607-73756007	Tet_TH0	Closed
Hif1a	2.06805e-122	2.33251e-120	7.72565	chr12	73879697	73880097	401	*	2.17141	2.93273	0	1.73252	0.00065763	0.00530271	Intron (ENSMUST00000221427.1/ENSMUST00000221427.1, intron 1 of 2)	12	73901375	73947530	46156	1	15251	-21278	ENSMUSG00000021109	Hif1a	hypoxia inducible factor 1, alpha subunit	15251	0	chr12:73879697-73880097	Tet_TH0	Closed
Plxnc1	2.28418e-175	5.09715e-173	4.4726	chr10	94864568	94864968	401	*	3.76982	4.30716	2.44166	1.65023	0.000117203	0.00126926	3' UTR	10	94790866	94944835	153970	2	54712	79867	ENSMUSG00000074785	Plxnc1	plexin C1	54712	0	chr10:94864568-94864968	Tet_TH0	Closed
Trib1	2.77154e-280	1.74296e-277	32.22	chr15	59596064	59596464	401	*	3.86534	2.74027	4.64945	-1.53483	3.49057e-05	0.000461722	Intron (ENSMUST00000227173.1/68501, intron 7 of 7)	15	59648350	59657099	8750	1	211770	-51886	ENSMUSG00000032501	Trib1	tribbles pseudokinase 1	68501	0	chr15:59596064-59596464	Tet_TH0	Open
Trib1	2.77154e-280	1.74296e-277	32.22	chr15	59522787	59523187	401	*	3.74532	2.83064	4.4467	-1.3683	0.000313046	0.00285603	Intron (ENSMUST00000168722.2/68501, intron 4 of 4)	15	59648350	59657099	8750	1	211770	-125163	ENSMUSG00000032501	Trib1	tribbles pseudokinase 1	68501	0	chr15:59522787-59523187	Tet_TH0	Open
Il2rb	0	0	22.6637	chr15	78493572	78493972	401	*	4.87939	5.47482	3.23001	1.91041	3.20301e-06	6.20264e-05	Promoter (1-2kb)	15	78479256	78495271	16016	2	16185	1299	ENSMUSG00000068227	Il2rb	interleukin 2 receptor, beta chain	71753;16185;72709;20607	0;0;0;50713	chr15:78493572-78493972	Tet_TH0	Closed
Fam46a	1.50861e-216	5.13248e-214	-26.0524																										Tet_TH0
Rnf216	4.29966e-304	3.18682e-301	5.99176	chr5	143112885	143113285	401	*	4.9289	5.39894	3.88932	1.35876	0.00013372	0.00141661	Promoter (<=1kb)	5	142990893	143112994	122102	2	108086	0	ENSMUSG00000045078	Rnf216	ring finger protein 216	108086	0	chr5:143112885-143113285	Tet_TH0	Closed
Casp1	3.7687e-220	1.39664e-217	13.1058																										Tet_TH0
Ptger2	4.13252e-215	1.34003e-212	46.0762																										Tet_TH0
Asap1	0	0	4.21724	chr15	64284520	64284920	401	*	3.20288	3.81422	1.4486	1.73497	0.000221323	0.00214412	Intron (ENSMUST00000177371.7/13196, intron 1 of 27)	15	64086857	64382919	296063	2	13196	97999	ENSMUSG00000022377	Asap1	ArfGAP with SH3 domain, ankyrin repeat and PH domain1	13196	0	chr15:64284520-64284920	Tet_TH0	Closed
Asap1	0	0	4.21724	chr15	64278771	64279171	401	*	4.44801	3.45153	5.18356	-1.50313	5.61866e-06	9.94884e-05	Intron (ENSMUST00000177371.7/13196, intron 1 of 27)	15	64086857	64382919	296063	2	13196	103748	ENSMUSG00000022377	Asap1	ArfGAP with SH3 domain, ankyrin repeat and PH domain1	13196	0	chr15:64278771-64279171	Tet_TH0	Open
Atcay	5.813e-183	1.38663e-180	22.091																										Tet_TH0
Kcnf1	4.76563e-155	8.38145e-153	7.04339																										Tet_TH0
Mvb12b	1.67038e-135	2.20798e-133	8.51511	chr2	33908352	33908752	401	*	6.15009	4.97872	6.95029	-1.75314	9.48948e-08	3.18251e-06	Distal Intergenic	2	33729953	33887946	157994	2	72543	-20406	ENSMUSG00000038740	Mvb12b	multivesicular body subunit 12B	72543	0	chr2:33908352-33908752	Tet_TH0	Open
Atp2b4	0	0	11.9327																										Tet_TH0
Sytl3	8.20347e-92	6.14609e-90	16.6886																										Tet_TH0
Pced1b	1.7955e-192	4.65776e-190	-6.01987																										Tet_TH0
Cybb	2.34802e-268	1.35357e-265	655.716																										Tet_TH0
Ephx1	6.77446e-229	2.65265e-226	4.19187	chr1	180987604	180988004	401	*	4.40153	3.7822	4.9528	-0.985329	0.00137409	0.00976969	Intron (ENSMUST00000154133.7/13849, intron 4 of 4)	1	180976210	181020904	44695	2	13849	32900	ENSMUSG00000038776	Ephx1	epoxide hydrolase 1, microsomal	13590;208795;13849	0;0;0	chr1:180987604-180988004	Tet_TH0	Open
Ext1	1.95584e-264	1.09702e-261	7.17668	chr15	53328063	53328463	401	*	4.31298	2.78787	5.21606	-2.11741	2.24452e-09	1.44109e-07	Intron (ENSMUST00000077273.8/14042, intron 1 of 10)	15	53064038	53346159	282122	2	14042	17696	ENSMUSG00000061731	Ext1	exostosin glycosyltransferase 1	14042	0	chr15:53328063-53328463	Tet_TH0	Open
Ext1	1.95584e-264	1.09702e-261	7.17668	chr15	53235344	53235744	401	*	4.41099	3.75307	4.98464	-1.03274	0.0012177	0.00885528	Intron (ENSMUST00000077273.8/14042, intron 1 of 10)	15	53064038	53346159	282122	2	14042	110415	ENSMUSG00000061731	Ext1	exostosin glycosyltransferase 1	14042	0	chr15:53235344-53235744	Tet_TH0	Open
Ext1	1.95584e-264	1.09702e-261	7.17668	chr15	53353910	53354310	401	*	3.86439	3.07575	4.5073	-1.14773	0.00129213	0.00929521	Distal Intergenic	15	53064038	53346159	282122	2	14042	-7751	ENSMUSG00000061731	Ext1	exostosin glycosyltransferase 1	14042	0	chr15:53353910-53354310	Tet_TH0	Open
Pear1	7.25901e-179	1.65545e-176	10.5082	chr3	87832276	87832676	401	*	4.35071	4.96902	2.54761	1.80222	0.000158299	0.00162212	Distal Intergenic	3	87747890	87824306	76417	2	73182	-7970	ENSMUSG00000028073	Pear1	platelet endothelial aggregation receptor 1	73182;18211;23920;27371;94315	0;-37114;35325;0;0	chr3:87832276-87832676	Tet_TH0	Closed
Cd22	3.23669e-189	8.1916e-187	1110.85	chr7	30887562	30887962	401	*	3.55276	4.08164	2.26501	1.50231	0.000280223	0.00260339	Distal Intergenic	7	30865402	30880342	14941	2	12483	-7220	ENSMUSG00000030577	Cd22	CD22 antigen	233080;233081;12483;17136;66438	-31384;-25998;-7220;26911;36719	chr7:30887562-30887962	Tet_TH0	Closed
Ggt5	6.94054e-154	1.17103e-151	-12.2179																										Tet_TH0
Btbd11	9.5899e-222	3.61853e-219	22.3666	chr10	85411121	85411521	401	*	4.29972	3.24634	5.0575	-1.528	2.42149e-05	0.000339768	Intron (ENSMUST00000105307.7/74007, intron 1 of 16)	10	85386814	85660292	273479	1	74007	24307	ENSMUSG00000020042	Btbd11	BTB (POZ) domain containing 11	74007	0	chr10:85411121-85411521	Tet_TH0	Open
Kif13a	3.7762e-242	1.7415e-239	12.5079	chr13	46930248	46930648	401	*	3.91089	4.46476	2.49958	1.70496	1.79437e-05	0.00026305	Promoter (<=1kb)	13	46749087	46929867	180781	2	16553	-381	ENSMUSG00000021375	Kif13a	kinesin family member 13A	16553	0	chr13:46930248-46930648	Tet_TH0	Closed
Kif13a	3.7762e-242	1.7415e-239	12.5079	chr13	46909031	46909431	401	*	2.51542	3.18434	0.28766	1.65948	0.00105676	0.00787896	Intron (ENSMUST00000056978.7/16553, intron 2 of 37)	13	46749087	46929867	180781	2	16553	20436	ENSMUSG00000021375	Kif13a	kinesin family member 13A	16553	0	chr13:46909031-46909431	Tet_TH0	Closed
Eea1	2.45805e-212	7.61372e-210	32.8408	chr10	95914465	95914865	401	*	3.93737	4.60509	1.72151	2.29581	4.14696e-07	1.09911e-05	Distal Intergenic	10	95940650	96045518	104869	1	216238	-25785	ENSMUSG00000036499	Eea1	early endosome antigen 1	216238	0	chr10:95914465-95914865	Tet_TH0	Closed
Eea1	2.45805e-212	7.61372e-210	32.8408	chr10	95940537	95940937	401	*	5.01398	5.5131	3.85835	1.45515	2.27186e-05	0.000321488	Promoter (<=1kb)	10	95940650	96045518	104869	1	216238	0	ENSMUSG00000036499	Eea1	early endosome antigen 1	216238	0	chr10:95940537-95940937	Tet_TH0	Closed
Eea1	2.45805e-212	7.61372e-210	32.8408	chr10	96015713	96016113	401	*	4.2672	4.73394	3.24006	1.39721	0.000229574	0.00220919	Intron (ENSMUST00000218291.1/216238, intron 12 of 17)	10	95940650	96045518	104869	1	216238	75063	ENSMUSG00000036499	Eea1	early endosome antigen 1	216238	0	chr10:96015713-96016113	Tet_TH0	Closed
Eea1	2.45805e-212	7.61372e-210	32.8408	chr10	95779644	95780044	401	*	3.9432	2.60647	4.79555	-1.82185	1.75925e-06	3.72305e-05	Intron (ENSMUST00000187483.6/ENSMUST00000187483.6, intron 2 of 5)	10	95940650	96045518	104869	1	216238	-160606	ENSMUSG00000036499	Eea1	early endosome antigen 1			chr10:95779644-95780044	Tet_TH0	Open
Cdk5r1	1.06923e-161	2.01725e-159	15.9423																										Tet_TH0
Timp2	1.60413e-239	6.93552e-237	5.98522																										Tet_TH0
Casp4	6.56584e-216	2.19776e-213	16.6515																										Tet_TH0
Mrgpre	6.85338e-163	1.30485e-160	39.8973																										Tet_TH0
Dhrs3	1.17673e-146	1.78253e-144	315.672	chr4	144986003	144986403	401	*	3.46269	4.04748	1.87881	1.72864	0.000118575	0.00128179	Intron (ENSMUST00000036579.13/230895, intron 67 of 69)	4	144892827	144928209	35383	1	20148	93176	ENSMUSG00000066026	Dhrs3	dehydrogenase/reductase (SDR family) member 3	230895	0	chr4:144986003-144986403	Tet_TH0	Closed
Sptb	4.58862e-183	1.1073e-180	20.7898																										Tet_TH0
Gng2	4.73517e-150	7.55916e-148	5.67652	chr14	19967446	19967846	401	*	3.14681	3.67078	1.8819	1.4705	0.000964286	0.00730751	Intron (ENSMUST00000160013.7/14702, intron 1 of 3)	14	19872559	19977627	105069	2	14702	9781	ENSMUSG00000043004	Gng2	guanine nucleotide binding protein (G protein), gamma 2	14702	0	chr14:19967446-19967846	Tet_TH0	Closed
Tjp2	4.50903e-223	1.73289e-220	64.397	chr19	24173989	24174389	401	*	5.17565	5.72768	3.7739	1.80113	2.8316e-06	5.57939e-05	5' UTR	19	24094505	24225030	130526	2	21873	50641	ENSMUSG00000024812	Tjp2	tight junction protein 2	21873	0	chr19:24173989-24174389	Tet_TH0	Closed
Tjp2	4.50903e-223	1.73289e-220	64.397	chr19	24166485	24166885	401	*	4.92312	5.34679	4.04714	1.20735	0.000537688	0.00448102	Intron (ENSMUST00000233027.1/21873, intron 1 of 22)	19	24094505	24225030	130526	2	21873	58145	ENSMUSG00000024812	Tjp2	tight junction protein 2	21873	0	chr19:24166485-24166885	Tet_TH0	Closed
Slc9a9	7.00309e-121	7.81372e-119	5.35398																										Tet_TH0
Art2a-ps	2.27712e-136	3.08869e-134	256.033																										Tet_TH0
Spata13	5.34752e-234	2.21954e-231	4.00338	chr14	60524854	60525254	401	*	3.07783	3.72166	1.07809	1.79697	0.000178975	0.00179219	Intron (ENSMUST00000190392.1/ENSMUST00000190392.1, intron 2 of 2)	14	60634001	60764556	130556	1	219140	-108747	ENSMUSG00000021990	Spata13	spermatogenesis associated 13			chr14:60524854-60525254	Tet_TH0	Closed
Dusp4	1.8462e-108	1.7738e-106	23.8928																										Tet_TH0
Cd44	8.02191e-236	3.39752e-233	9.18659	chr2	102956922	102957322	401	*	5.18638	5.93078	1.85913	3.15939	1.62803e-11	2.29062e-09	Distal Intergenic	2	102811141	102901665	90525	2	12505	-55257	ENSMUSG00000005087	Cd44	CD44 antigen			chr2:102956922-102957322	Tet_TH0	Closed
Cd44	8.02191e-236	3.39752e-233	9.18659	chr2	102887356	102887756	401	*	3.70688	4.27432	2.22279	1.6766	8.21023e-05	0.000947227	Intron (ENSMUST00000005218.14/12505, intron 1 of 18)	2	102811141	102901665	90525	2	12505	13909	ENSMUSG00000005087	Cd44	CD44 antigen	12505	0	chr2:102887356-102887756	Tet_TH0	Closed
Cd44	8.02191e-236	3.39752e-233	9.18659	chr2	102909451	102909851	401	*	5.0123	2.73637	6.05356	-2.92574	3.70012e-17	5.12595e-14	Distal Intergenic	2	102811141	102901665	90525	2	12505	-7786	ENSMUSG00000005087	Cd44	CD44 antigen	12505	0	chr2:102909451-102909851	Tet_TH0	Open
Cd44	8.02191e-236	3.39752e-233	9.18659	chr2	102970199	102970599	401	*	4.18143	3.24719	4.89124	-1.35246	0.000178912	0.00179206	Distal Intergenic	2	102811141	102901665	90525	2	12505	-68534	ENSMUSG00000005087	Cd44	CD44 antigen			chr2:102970199-102970599	Tet_TH0	Open
Cd44	8.02191e-236	3.39752e-233	9.18659	chr2	102912998	102913398	401	*	4.74216	4.03231	5.34449	-1.0921	0.000594896	0.0048821	Distal Intergenic	2	102811141	102901665	90525	2	12505	-11333	ENSMUSG00000005087	Cd44	CD44 antigen	12505	0	chr2:102912998-102913398	Tet_TH0	Open
Cd200	0	0	36.8942																										Tet_TH0
Smco4	2.36176e-140	3.33426e-138	11.3748	chr9	15552463	15552863	401	*	4.24501	4.8408	2.59338	1.89196	6.53045e-06	0.000112772	Distal Intergenic	9	15493432	15545260	51829	1	170748	59031	ENSMUSG00000058173	Smco4	single-pass membrane protein with coiled-coil domains 4	170748;234964	0;0	chr9:15552463-15552863	Tet_TH0	Closed
Smco4	2.36176e-140	3.33426e-138	11.3748	chr9	15501262	15501662	401	*	4.27873	4.85716	2.73237	1.78982	1.59486e-05	0.000237966	Intron (ENSMUST00000215907.1/170748, intron 1 of 2)	9	15493432	15545260	51829	1	170748	7830	ENSMUSG00000058173	Smco4	single-pass membrane protein with coiled-coil domains 4	170748	0	chr9:15501262-15501662	Tet_TH0	Closed
Smco4	2.36176e-140	3.33426e-138	11.3748	chr9	15539095	15539495	401	*	4.21693	4.60834	3.44206	1.08825	0.00134303	0.00959625	Intron (ENSMUST00000215907.1/170748, intron 2 of 2)	9	15493432	15545260	51829	1	170748	45663	ENSMUSG00000058173	Smco4	single-pass membrane protein with coiled-coil domains 4	170748;234964	0;0	chr9:15539095-15539495	Tet_TH0	Closed
Abi2	4.03202e-174	8.71631e-172	6.65318	chr1	60416733	60417133	401	*	4.88532	2.82288	5.89547	-2.6433	3.97793e-13	1.00197e-10	Intron (ENSMUST00000052332.14/329165, intron 1 of 8)	1	60409619	60481158	71540	1	329165	7114	ENSMUSG00000026782	Abi2	abl interactor 2	77951;329165	0;0	chr1:60416733-60417133	Tet_TH0	Open
Abi2	4.03202e-174	8.71631e-172	6.65318	chr1	60447083	60447483	401	*	3.8794	2.54966	4.72971	-1.54602	0.000990363	0.00747212	Exon (ENSMUST00000052332.14/329165, exon 5 of 9)	1	60409619	60481158	71540	1	329165	37464	ENSMUSG00000026782	Abi2	abl interactor 2	329165;77300	0;0	chr1:60447083-60447483	Tet_TH0	Open
Plcb4	4.75352e-77	2.79461e-75	5.69046																										Tet_TH0
Hip1r	4.61586e-146	6.89158e-144	8.51957																										Tet_TH0
Atf6	2.81151e-164	5.45302e-162	14.5672	chr1	170863030	170863430	401	*	3.87503	2.63723	4.69713	-1.77567	1.35754e-06	2.98336e-05	Intron (ENSMUST00000027974.6/226641, intron 1 of 15)	1	170704674	170867771	163098	2	226641	4341	ENSMUSG00000026663	Atf6	activating transcription factor 6	226641;80915;435653	0;0;49511	chr1:170863030-170863430	Tet_TH0	Open
Stk39	1.13507e-125	1.33085e-123	4.62251	chr2	68319686	68320086	401	*	4.02436	2.92737	4.79837	-1.63787	1.34341e-05	0.000205995	Intron (ENSMUST00000102715.3/53416, intron 10 of 17)	2	68210445	68472268	261824	2	53416	152182	ENSMUSG00000027030	Stk39	serine/threonine kinase 39	53416	0	chr2:68319686-68320086	Tet_TH0	Open
Abhd4	2.7923e-232	1.1144e-229	30.3503																										Tet_TH0
Ccdc50	5.40761e-196	1.45746e-193	6.46607																										Tet_TH0
Arnt2	1.89203e-105	1.7687e-103	163.983	chr7	84386500	84386900	401	*	3.95231	4.56686	2.17583	1.93051	4.99464e-06	8.99061e-05	Intron (ENSMUST00000085077.4/11864, intron 1 of 18)	7	84246278	84410176	163899	2	11864	23276	ENSMUSG00000015709	Arnt2	aryl hydrocarbon receptor nuclear translocator 2	11864	0	chr7:84386500-84386900	Tet_TH0	Closed
Arnt2	1.89203e-105	1.7687e-103	163.983	chr7	84408498	84408898	401	*	2.7027	3.32927	0.839176	1.65047	0.000862617	0.00664896	Promoter (1-2kb)	7	84246278	84410176	163899	2	11864	1278	ENSMUSG00000015709	Arnt2	aryl hydrocarbon receptor nuclear translocator 2	11864	0	chr7:84408498-84408898	Tet_TH0	Closed
Ikzf3	1.37076e-127	1.66359e-125	5.29832																										Tet_TH0
Nfia	8.13802e-103	7.37503e-101	20.974	chr4	97657549	97657949	401	*	4.87522	3.65834	5.69056	-1.75134	3.0144e-07	8.42325e-06	Intron (ENSMUST00000146447.7/319865, intron 3 of 5)	4	97772734	98118874	346141	1	18027	-114785	ENSMUSG00000028565	Nfia	nuclear factor I/A	319865	0	chr4:97657549-97657949	Tet_TH0	Open
Sema4a	1.41041e-96	1.17081e-94	-9.01505																										Tet_TH0
Prr13	5.82024e-220	2.11908e-217	4.16997	chr15	102458230	102458630	401	*	4.22073	3.24134	4.94937	-1.50176	5.22154e-06	9.34301e-05	Promoter (<=1kb)	15	102459028	102462806	3779	1	66151	-398	ENSMUSG00000023048	Prr13	proline rich 13	20683;110542;66151;18521;26404	0;12863;0;0;0	chr15:102458230-102458630	Tet_TH0	Open
Fam71b	3.68874e-74	2.04686e-72	7.92561	chr11	46404974	46405374	401	*	4.22091	3.35126	4.90225	-1.30741	0.000195259	0.00192897	Exon (ENSMUST00000063166.5/432552, exon 1 of 2)	11	46396559	46407982	11424	1	432552	8415	ENSMUSG00000020401	Fam71b	family with sequence similarity 71, member B	16428;432552;66213;171285	0;0;0;-49561	chr11:46404974-46405374	Tet_TH0	Open
Spry1	0	0	30.0321																										Tet_TH0
Smox	1.21193e-91	9.04716e-90	9.63627																										Tet_TH0
Il4ra	8.53272e-175	1.86399e-172	-7.19592	chr7	125561207	125561607	401	*	5.36067	3.9365	6.23762	-2.0621	1.13732e-10	1.19085e-08	Intron (ENSMUST00000033004.7/16190, intron 1 of 10)	7	125552120	125579474	27355	1	16190	9087	ENSMUSG00000030748	Il4ra	interleukin 4 receptor, alpha	16190;60504	0;0	chr7:125561207-125561607	Tet_TH0	Open
Phactr2	3.18212e-169	6.53847e-167	6.91181	chr10	13424513	13424913	401	*	4.54214	5.25683	1.75776	2.1463	5.03359e-05	0.000628004	Intron (ENSMUST00000105545.11/215789, intron 1 of 12)	10	13207717	13474412	266696	2	215789	49499	ENSMUSG00000062866	Phactr2	phosphatase and actin regulator 2	215789	0	chr10:13424513-13424913	Tet_TH0	Closed
Phactr2	3.18212e-169	6.53847e-167	6.91181	chr10	13384844	13385244	401	*	3.31696	3.89702	1.76112	1.60372	0.000321406	0.00292341	Intron (ENSMUST00000105545.11/215789, intron 1 of 12)	10	13207717	13474412	266696	2	215789	89168	ENSMUSG00000062866	Phactr2	phosphatase and actin regulator 2	215789	0	chr10:13384844-13385244	Tet_TH0	Closed
Myo1f	2.07328e-152	3.38793e-150	28.1855	chr17	33563495	33563895	401	*	3.37641	3.95033	1.856	1.55772	0.000445922	0.0038425	Intron (ENSMUST00000087605.12/17916, intron 1 of 27)	17	33555707	33607764	52058	1	17916	7788	ENSMUSG00000024300	Myo1f	myosin IF	224697;17916	0;0	chr17:33563495-33563895	Tet_TH0	Closed
Ntn1	1.00146e-93	7.87243e-92	18.8463																										Tet_TH0
Cxcr6	2.64677e-158	4.90433e-156	57.3553																										Tet_TH0
Evi2a	2.15469e-165	4.2587e-163	8.47156																										Tet_TH0
Nanos1	2.77203e-126	3.3062e-124	8.00732																										Tet_TH0
Prkca	5.43355e-213	1.70852e-210	7.04261																										Tet_TH0
Cxcr3	0	0	220.824																										Tet_TH0
Grhl1	1.64487e-172	3.48325e-170	14.6263	chr12	24565331	24565731	401	*	3.654	2.73217	4.35847	-1.268	0.000805047	0.00627776	Distal Intergenic	12	24572283	24617391	45109	1	195733	-6552	ENSMUSG00000020656	Grhl1	grainyhead like transcription factor 1	21340;195733	0;0	chr12:24565331-24565731	Tet_TH0	Open
Cebpa	7.93068e-127	9.51361e-125	648.89	chr7	35118906	35119306	401	*	5.31023	5.81982	4.10978	1.6178	6.00011e-06	0.000104607	Promoter (<=1kb)	7	35119303	35121928	2626	1	12606	0	ENSMUSG00000034957	Cebpa	CCAAT/enhancer binding protein (C/EBP), alpha	12606	0	chr7:35118906-35119306	Tet_TH0	Closed
Cebpa	7.93068e-127	9.51361e-125	648.89	chr7	35127781	35128181	401	*	2.96377	3.55809	1.32137	1.61596	0.000593663	0.00487532	Distal Intergenic	7	35119303	35121928	2626	1	12606	8478	ENSMUSG00000034957	Cebpa	CCAAT/enhancer binding protein (C/EBP), alpha	12606	0	chr7:35127781-35128181	Tet_TH0	Closed
Mdfic	9.22102e-201	2.62142e-198	17.1859																										Tet_TH0
S100a6	2.71504e-128	3.33403e-126	60.852																										Tet_TH0
Abcc3	4.36781e-132	5.52715e-130	71.3456																										Tet_TH0
Plcl1	2.20129e-89	1.56988e-87	11.6819																										Tet_TH0
Dapl1	4.21667e-110	4.16708e-108	-14.3151	chr2	59527641	59528041	401	*	4.57187	2.77096	5.53584	-2.35007	1.97598e-10	1.84864e-08	Distal Intergenic	2	59484653	59505020	20368	1	76747	42988	ENSMUSG00000026989	Dapl1	death associated protein-like 1	76747	42988	chr2:59527641-59528041	Tet_TH0	Open
Dapl1	4.21667e-110	4.16708e-108	-14.3151	chr2	59438489	59438889	401	*	4.57194	3.26538	5.41535	-1.86492	3.68251e-08	1.44065e-06	Distal Intergenic	2	59484653	59505020	20368	1	76747	-45764	ENSMUSG00000026989	Dapl1	death associated protein-like 1	76747	-45764	chr2:59438489-59438889	Tet_TH0	Open
Dapl1	4.21667e-110	4.16708e-108	-14.3151	chr2	59469723	59470123	401	*	5.27378	4.25037	6.02	-1.60239	7.62292e-08	2.66832e-06	Distal Intergenic	2	59484653	59505020	20368	1	76747	-14530	ENSMUSG00000026989	Dapl1	death associated protein-like 1	76747	-14530	chr2:59469723-59470123	Tet_TH0	Open
Dapl1	4.21667e-110	4.16708e-108	-14.3151	chr2	59474355	59474755	401	*	4.54169	3.15302	5.40888	-1.90219	2.45845e-07	7.10113e-06	Distal Intergenic	2	59484653	59505020	20368	1	76747	-9898	ENSMUSG00000026989	Dapl1	death associated protein-like 1	76747	-9898	chr2:59474355-59474755	Tet_TH0	Open
Dapl1	4.21667e-110	4.16708e-108	-14.3151	chr2	59467954	59468354	401	*	4.41697	3.48275	5.12676	-1.45849	8.14672e-06	0.000135474	Distal Intergenic	2	59484653	59505020	20368	1	76747	-16299	ENSMUSG00000026989	Dapl1	death associated protein-like 1	76747	-16299	chr2:59467954-59468354	Tet_TH0	Open
Dapl1	4.21667e-110	4.16708e-108	-14.3151	chr2	59470744	59471144	401	*	4.84246	4.05489	5.48485	-1.29412	2.52788e-05	0.000351415	Distal Intergenic	2	59484653	59505020	20368	1	76747	-13509	ENSMUSG00000026989	Dapl1	death associated protein-like 1	76747	-13509	chr2:59470744-59471144	Tet_TH0	Open
Txk	1.36755e-147	2.13389e-145	-11.6126	chr5	72761248	72761648	401	*	4.55981	2.90293	5.49376	-2.23323	5.87765e-10	4.6427e-08	Intron (ENSMUST00000071944.12/21682, intron 15 of 18)	5	72695978	72752777	56800	2	22165	-8471	ENSMUSG00000054892	Txk	TXK tyrosine kinase	22165;21682	0;0	chr5:72761248-72761648	Tet_TH0	Open
Txk	1.36755e-147	2.13389e-145	-11.6126	chr5	72752631	72753031	401	*	6.15817	5.16008	6.89436	-1.58756	3.68824e-08	1.44085e-06	Promoter (<=1kb)	5	72695978	72752777	56800	2	22165	0	ENSMUSG00000054892	Txk	TXK tyrosine kinase	22165;21682	0;0	chr5:72752631-72753031	Tet_TH0	Open
Txk	1.36755e-147	2.13389e-145	-11.6126	chr5	72731398	72731798	401	*	3.81339	2.77462	4.56558	-1.43653	0.000293213	0.00270801	Exon (ENSMUST00000169534.5/22165, exon 4 of 14)	5	72695978	72752777	56800	2	22165	20979	ENSMUSG00000054892	Txk	TXK tyrosine kinase	22165;21682	0;0	chr5:72731398-72731798	Tet_TH0	Open
Tspan5	2.77863e-83	1.80203e-81	4.87687	chr3	138893389	138893789	401	*	3.54835	4.0267	2.47675	1.28378	0.00123837	0.00897302	Intron (ENSMUST00000029800.8/56224, intron 3 of 7)	3	138742195	138907905	165711	1	56224	151194	ENSMUSG00000028152	Tspan5	tetraspanin 5	56224;229877	0;0	chr3:138893389-138893789	Tet_TH0	Closed
Tspan5	2.77863e-83	1.80203e-81	4.87687	chr3	138757237	138757637	401	*	4.27807	3.2255	5.03553	-1.5489	7.18186e-06	0.000122136	Intron (ENSMUST00000029800.8/56224, intron 1 of 7)	3	138742195	138907905	165711	1	56224	15042	ENSMUSG00000028152	Tspan5	tetraspanin 5	74635;56224	0;0	chr3:138757237-138757637	Tet_TH0	Open
Itgb8	2.75894e-83	1.79487e-81	72.975																										Tet_TH0
Ppfibp1	2.93963e-128	3.58859e-126	8.42445																										Tet_TH0
Aplp1	1.05338e-133	1.3663e-131	26.5717																										Tet_TH0
Tigit	8.14566e-155	1.40872e-152	927.82	chr16	43661477	43661877	401	*	4.60588	5.32449	1.76112	2.42508	2.33535e-06	4.72832e-05	Intron (ENSMUST00000096065.5/100043314, intron 2 of 3)	16	43648867	43664146	15280	2	100043314	2269	ENSMUSG00000071552	Tigit	T cell immunoreceptor with Ig and ITIM domains	56490;100124467;100043314	0;20822;0	chr16:43661477-43661877	Tet_TH0	Closed
Tigit	8.14566e-155	1.40872e-152	927.82	chr16	43694059	43694459	401	*	3.71487	4.30197	2.11699	1.76275	5.51703e-05	0.000678218	Exon (ENSMUST00000232267.1/ENSMUST00000232267.1, exon 3 of 3)	16	43648867	43664146	15280	2	100043314	-29913	ENSMUSG00000071552	Tigit	T cell immunoreceptor with Ig and ITIM domains	100043314	0	chr16:43694059-43694459	Tet_TH0	Closed
Tigit	8.14566e-155	1.40872e-152	927.82	chr16	43700550	43700950	401	*	3.49151	4.06029	1.99998	1.57691	0.000272334	0.00254388	Intron (ENSMUST00000232267.1/ENSMUST00000232267.1, intron 1 of 2)	16	43648867	43664146	15280	2	100043314	-36404	ENSMUSG00000071552	Tigit	T cell immunoreceptor with Ig and ITIM domains	100043314	0	chr16:43700550-43700950	Tet_TH0	Closed
Tigit	8.14566e-155	1.40872e-152	927.82	chr16	43701973	43702373	401	*	3.8527	4.267	3.00706	1.20141	0.00131407	0.00943049	Intron (ENSMUST00000232267.1/ENSMUST00000232267.1, intron 1 of 2)	16	43648867	43664146	15280	2	100043314	-37827	ENSMUSG00000071552	Tigit	T cell immunoreceptor with Ig and ITIM domains	100043314	0	chr16:43701973-43702373	Tet_TH0	Closed
Myo1e	7.65267e-166	1.52708e-163	73.0441	chr9	70207059	70207459	401	*	4.77345	5.33994	3.29462	1.82093	9.71416e-07	2.24718e-05	Promoter (<=1kb)	9	70207350	70399766	192417	1	71602	0	ENSMUSG00000032220	Myo1e	myosin IE	71602	0	chr9:70207059-70207459	Tet_TH0	Closed
Myo1e	7.65267e-166	1.52708e-163	73.0441	chr9	70244058	70244458	401	*	3.34286	3.97005	1.47471	1.85129	9.26774e-05	0.00104611	Intron (ENSMUST00000213863.1/71602, intron 1 of 3)	9	70207350	70399766	192417	1	71602	36708	ENSMUSG00000032220	Myo1e	myosin IE	71602	0	chr9:70244058-70244458	Tet_TH0	Closed
Hap1	7.33743e-105	6.76772e-103	60.6072																										Tet_TH0
Kcna3	2.40109e-94	1.90919e-92	4.6513																										Tet_TH0
Sh3rf1	6.26981e-115	6.74184e-113	6.13613																										Tet_TH0
Rras2	5.52636e-204	1.61533e-201	-33.6975	chr7	114088049	114088449	401	*	4.96168	2.87163	5.97615	-2.71872	2.7039e-15	1.6232e-12	Exon (ENSMUST00000210417.1/ENSMUST00000210417.1, exon 2 of 2)	7	114046782	114117781	71000	2	66922	29332	ENSMUSG00000055723	Rras2	related RAS viral (r-ras) oncogene 2	233744;66922	322051;0	chr7:114088049-114088449	Tet_TH0	Open
Rras2	5.52636e-204	1.61533e-201	-33.6975	chr7	114070074	114070474	401	*	5.32884	4.12526	6.13982	-1.77296	1.20739e-07	3.92147e-06	Intron (ENSMUST00000069449.6/66922, intron 1 of 5)	7	114046782	114117781	71000	2	66922	47307	ENSMUSG00000055723	Rras2	related RAS viral (r-ras) oncogene 2	233744;66922	304076;0	chr7:114070074-114070474	Tet_TH0	Open
Rras2	5.52636e-204	1.61533e-201	-33.6975	chr7	114069174	114069574	401	*	5.60404	4.44007	6.40171	-1.73463	1.95108e-07	5.83203e-06	Intron (ENSMUST00000069449.6/66922, intron 1 of 5)	7	114046782	114117781	71000	2	66922	48207	ENSMUSG00000055723	Rras2	related RAS viral (r-ras) oncogene 2	233744;66922	303176;0	chr7:114069174-114069574	Tet_TH0	Open
Rras2	5.52636e-204	1.61533e-201	-33.6975	chr7	114161083	114161483	401	*	4.0349	2.72194	4.88023	-1.54965	0.000844252	0.00654241	Distal Intergenic	7	114046782	114117781	71000	2	66922	-43302	ENSMUSG00000055723	Rras2	related RAS viral (r-ras) oncogene 2	66922	0	chr7:114161083-114161483	Tet_TH0	Open
Rora	6.58051e-66	3.19825e-64	4.74481																										Tet_TH0
Gprin3	8.53239e-111	8.63769e-109	6.05821																										Tet_TH0
Tmem38b	1.59919e-153	2.67646e-151	8.16511																										Tet_TH0
Calhm2	7.50119e-153	1.24538e-150	11.0759	chr19	47135777	47136177	401	*	4.06617	4.60537	2.72894	1.53093	4.63754e-05	0.000584872	5' UTR	19	47105353	47138294	32942	2	72691	2117	ENSMUSG00000033033	Calhm2	calcium homeostasis modulator family member 2	102465114;66477;18572;72691;546729;18011	0;0;0;0;0;-42643	chr19:47135777-47136177	Tet_TH0	Closed
Sesn1	1.02876e-140	1.46232e-138	-5.38176	chr10	41880751	41881151	401	*	3.77821	1.49776	4.82007	-2.65119	1.41105e-09	9.64415e-08	Intron (ENSMUST00000099931.10/140742, intron 1 of 9)	10	41809935	41908424	98490	1	140742	70816	ENSMUSG00000038332	Sesn1	sestrin 1	140742;213402	0;0	chr10:41880751-41881151	Tet_TH0	Open
Rab43	6.54527e-138	9.11637e-136	4.40632																										Tet_TH0
Rgs16	4.07461e-124	4.67184e-122	135.926	chr1	153740063	153740463	401	*	5.2682	5.83967	3.76163	1.83242	2.18194e-07	6.41039e-06	Promoter (<=1kb)	1	153740349	153745468	5120	1	19734	0	ENSMUSG00000026475	Rgs16	regulator of G-protein signaling 16	67792;329271;19734;24014;240816	0;0;0;0;103679	chr1:153740063-153740463	Tet_TH0	Closed
Ptpn11	2.25061e-179	5.18967e-177	13.405	chr5	121179056	121179456	401	*	4.31834	5.02874	1.59714	2.80352	3.36374e-09	1.97972e-07	Intron (ENSMUST00000100770.8/19247, intron 1 of 15)	5	121130533	121191397	60865	2	19247	11941	ENSMUSG00000043733	Ptpn11	protein tyrosine phosphatase, non-receptor type 11	19247;19988;269700	0;0;0	chr5:121179056-121179456	Tet_TH0	Closed
Ptpn11	2.25061e-179	5.18967e-177	13.405	chr5	121184809	121185209	401	*	4.3901	5.00106	2.63844	2.02423	3.56474e-07	9.63951e-06	Exon (ENSMUST00000200872.1/ENSMUST00000200872.1, exon 1 of 1)	5	121130533	121191397	60865	2	19247	6188	ENSMUSG00000043733	Ptpn11	protein tyrosine phosphatase, non-receptor type 11	19247;19988;269700	0;0;0	chr5:121184809-121185209	Tet_TH0	Closed
Ptpn11	2.25061e-179	5.18967e-177	13.405	chr5	121189317	121189717	401	*	3.818	4.4661	1.78217	2.1075	1.92209e-06	4.00415e-05	Promoter (1-2kb)	5	121130533	121191397	60865	2	19247	1680	ENSMUSG00000043733	Ptpn11	protein tyrosine phosphatase, non-receptor type 11	19247;19988;269700	0;0;0	chr5:121189317-121189717	Tet_TH0	Closed
Ptpn11	2.25061e-179	5.18967e-177	13.405	chr5	121149297	121149697	401	*	4.03928	4.63674	2.37695	1.90972	1.12577e-05	0.000177614	Intron (ENSMUST00000100770.8/19247, intron 9 of 15)	5	121130533	121191397	60865	2	19247	41700	ENSMUSG00000043733	Ptpn11	protein tyrosine phosphatase, non-receptor type 11	19247	0	chr5:121149297-121149697	Tet_TH0	Closed
Ptpn11	2.25061e-179	5.18967e-177	13.405	chr5	121172819	121173219	401	*	3.47582	4.05734	1.91136	1.60216	0.000158727	0.00162558	Intron (ENSMUST00000100770.8/19247, intron 1 of 15)	5	121130533	121191397	60865	2	19247	18178	ENSMUSG00000043733	Ptpn11	protein tyrosine phosphatase, non-receptor type 11	19247;19988;269700	0;0;0	chr5:121172819-121173219	Tet_TH0	Closed
Lamc1	4.07173e-99	3.52086e-97	14.8138	chr1	153332840	153333240	401	*	4.93511	5.33809	4.12501	1.08543	0.000804314	0.00627341	Promoter (<=1kb)	1	153218922	153332786	113865	2	226519	-54	ENSMUSG00000026478	Lamc1	laminin, gamma 1	226519	0	chr1:153332840-153333240	Tet_TH0	Closed
Lamc1	4.07173e-99	3.52086e-97	14.8138	chr1	153320121	153320521	401	*	4.41681	2.91136	5.31498	-2.05688	1.05446e-08	5.15343e-07	Intron (ENSMUST00000027752.14/226519, intron 1 of 27)	1	153218922	153332786	113865	2	226519	12265	ENSMUSG00000026478	Lamc1	laminin, gamma 1	226519	0	chr1:153320121-153320521	Tet_TH0	Open
Arid3b	6.11932e-60	2.61305e-58	-4.19498																										Tet_TH0
Myc	7.16264e-144	1.06176e-141	-7.00824																										Tet_TH0
Tmem2	9.02671e-142	1.30091e-139	10.0276																										Tet_TH0
Setbp1	1.12143e-109	1.09779e-107	31.8239	chr18	79064071	79064471	401	*	4.94778	5.34567	4.15332	1.09676	0.00085176	0.00659067	Intron (ENSMUST00000025430.10/240427, intron 2 of 5)	18	78750380	79109391	359012	2	240427	44920	ENSMUSG00000024548	Setbp1	SET binding protein 1	240427	0	chr18:79064071-79064471	Tet_TH0	Closed
Setbp1	1.12143e-109	1.09779e-107	31.8239	chr18	79303529	79303929	401	*	4.86589	3.50112	5.72634	-1.97816	7.00306e-10	5.38981e-08	Exon (ENSMUST00000236697.1/ENSMUST00000236697.1, exon 1 of 1)	18	78750380	79109391	359012	2	240427	-194138	ENSMUSG00000024548	Setbp1	SET binding protein 1			chr18:79303529-79303929	Tet_TH0	Open
Setbp1	1.12143e-109	1.09779e-107	31.8239	chr18	79267758	79268158	401	*	4.16565	2.51248	5.09878	-2.16952	5.36442e-09	2.93649e-07	Distal Intergenic	18	78750380	79109391	359012	2	240427	-158367	ENSMUSG00000024548	Setbp1	SET binding protein 1			chr18:79267758-79268158	Tet_TH0	Open
Setbp1	1.12143e-109	1.09779e-107	31.8239	chr18	79297804	79298204	401	*	3.94551	2.14288	4.90982	-2.2924	9.58711e-09	4.75541e-07	Distal Intergenic	18	78750380	79109391	359012	2	240427	-188413	ENSMUSG00000024548	Setbp1	SET binding protein 1			chr18:79297804-79298204	Tet_TH0	Open
Setbp1	1.12143e-109	1.09779e-107	31.8239	chr18	79293701	79294101	401	*	4.10477	2.58349	5.0069	-2.03955	8.47902e-08	2.90586e-06	Distal Intergenic	18	78750380	79109391	359012	2	240427	-184310	ENSMUSG00000024548	Setbp1	SET binding protein 1			chr18:79293701-79294101	Tet_TH0	Open
Setbp1	1.12143e-109	1.09779e-107	31.8239	chr18	79234327	79234727	401	*	3.79488	2.46649	4.64479	-1.76982	7.77298e-06	0.000130342	Distal Intergenic	18	78750380	79109391	359012	2	240427	-124936	ENSMUSG00000024548	Setbp1	SET binding protein 1			chr18:79234327-79234727	Tet_TH0	Open
Setbp1	1.12143e-109	1.09779e-107	31.8239	chr18	79257015	79257415	401	*	5.92582	5.27935	6.49292	-1.06892	0.000419801	0.0036559	Distal Intergenic	18	78750380	79109391	359012	2	240427	-147624	ENSMUSG00000024548	Setbp1	SET binding protein 1			chr18:79257015-79257415	Tet_TH0	Open
Dab2ip	7.51627e-96	6.14114e-94	108.176																										Tet_TH0
Mical2	3.22309e-126	3.82222e-124	16.5845	chr7	112213038	112213438	401	*	5.22391	4.55176	5.80557	-1.03968	0.00138419	0.00981828	Distal Intergenic	7	112225856	112355194	129339	1	320878	-12418	ENSMUSG00000038244	Mical2	microtubule associated monooxygenase, calponin and LIM domain containing 2	320878	0	chr7:112213038-112213438	Tet_TH0	Open
Ces2c	3.39971e-125	3.96372e-123	720.342																										Tet_TH0
Mpp2	5.61452e-133	7.19248e-131	6.73465																										Tet_TH0
H1f0	3.39213e-97	2.82718e-95	7.53765																										Tet_TH0
Cd38	3.83586e-110	3.80888e-108	95.5665																										Tet_TH0
Bhlhe40	9.22835e-271	5.47188e-268	130.894	chr6	108660245	108660645	401	*	6.08379	6.54789	5.06654	1.33355	6.05781e-05	0.000731711	Promoter (<=1kb)	6	108660629	108666925	6297	1	20893	0	ENSMUSG00000030103	Bhlhe40	basic helix-loop-helix family, member e40	75394;20893	0;0	chr6:108660245-108660645	Tet_TH0	Closed
Bhlhe40	9.22835e-271	5.47188e-268	130.894	chr6	108659361	108659761	401	*	5.48875	5.91264	4.61205	1.18927	0.000122541	0.00131699	Promoter (<=1kb)	6	108660629	108666925	6297	1	20893	-868	ENSMUSG00000030103	Bhlhe40	basic helix-loop-helix family, member e40	75394;20893	0;0	chr6:108659361-108659761	Tet_TH0	Closed
Bhlhe40	9.22835e-271	5.47188e-268	130.894	chr6	108630728	108631128	401	*	3.77423	2.73416	4.52692	-1.52117	5.89778e-05	0.000715983	Intron (ENSMUST00000137478.3/75394, intron 1 of 6)	6	108660629	108666925	6297	1	20893	-29501	ENSMUSG00000030103	Bhlhe40	basic helix-loop-helix family, member e40	75394;20893	0;0	chr6:108630728-108631128	Tet_TH0	Open
Pde2a	2.62055e-118	2.87747e-116	8.62732																										Tet_TH0
Itpripl2	2.28418e-81	1.44523e-79	5.84297	chr7	118491837	118492237	401	*	4.21846	4.61698	3.42208	1.12339	0.000934817	0.00711413	Promoter (<=1kb)	7	118485111	118491975	6865	2	319622	0	ENSMUSG00000095115	Itpripl2	inositol 1,4,5-triphosphate receptor interacting protein-like 2	110058;319622;12850;209760	-43615;0;0;92499	chr7:118491837-118492237	Tet_TH0	Closed
Tbc1d16	6.12608e-142	8.89053e-140	-48.4218																										Tet_TH0
Rnase4	6.03718e-151	9.78825e-149	63.7846																										Tet_TH0
Ankrd6	6.01392e-92	4.53843e-90	13.987	chr4	32929083	32929483	401	*	4.15355	4.78887	2.22279	2.09227	9.49884e-07	2.20735e-05	Intron (ENSMUST00000084750.7/140577, intron 1 of 15)	4	32804035	32950841	146807	2	140577	21358	ENSMUSG00000040183	Ankrd6	ankyrin repeat domain 6	140577	0	chr4:32929083-32929483	Tet_TH0	Closed
Lpxn	1.86714e-102	1.67743e-100	4.51324																										Tet_TH0
Rasgef1a	7.87466e-103	7.16767e-101	13.3244																										Tet_TH0
Tox	1.39295e-112	1.43109e-110	6.51975	chr4	6882675	6883075	401	*	3.85467	4.48841	1.9363	2.10457	1.82125e-06	3.82506e-05	Intron (ENSMUST00000039987.3/252838, intron 1 of 8)	4	6686353	6991557	305205	2	252838	108482	ENSMUSG00000041272	Tox	thymocyte selection-associated high mobility group box	252838	0	chr4:6882675-6883075	Tet_TH0	Closed
Tox	1.39295e-112	1.43109e-110	6.51975	chr4	6870479	6870879	401	*	4.00613	4.48495	2.93276	1.35713	0.000228326	0.00220012	Intron (ENSMUST00000039987.3/252838, intron 1 of 8)	4	6686353	6991557	305205	2	252838	120678	ENSMUSG00000041272	Tox	thymocyte selection-associated high mobility group box	252838	0	chr4:6870479-6870879	Tet_TH0	Closed
Tox	1.39295e-112	1.43109e-110	6.51975	chr4	6880912	6881312	401	*	4.19673	4.67096	3.14115	1.35876	0.000322432	0.00293127	Intron (ENSMUST00000039987.3/252838, intron 1 of 8)	4	6686353	6991557	305205	2	252838	110245	ENSMUSG00000041272	Tox	thymocyte selection-associated high mobility group box	252838	0	chr4:6880912-6881312	Tet_TH0	Closed
Tox	1.39295e-112	1.43109e-110	6.51975	chr4	6940865	6941265	401	*	3.44906	3.97085	2.19414	1.48275	0.000525424	0.00440019	Intron (ENSMUST00000039987.3/252838, intron 1 of 8)	4	6686353	6991557	305205	2	252838	50292	ENSMUSG00000041272	Tox	thymocyte selection-associated high mobility group box	252838	0	chr4:6940865-6941265	Tet_TH0	Closed
Tox	1.39295e-112	1.43109e-110	6.51975	chr4	6963531	6963931	401	*	3.00917	3.58625	1.47061	1.45946	0.00106427	0.0079219	Intron (ENSMUST00000039987.3/252838, intron 1 of 8)	4	6686353	6991557	305205	2	252838	27626	ENSMUSG00000041272	Tox	thymocyte selection-associated high mobility group box	252838	0	chr4:6963531-6963931	Tet_TH0	Closed
Tox	1.39295e-112	1.43109e-110	6.51975	chr4	6970480	6970880	401	*	5.94835	4.9067	6.70164	-1.54706	2.44916e-05	0.000342189	Intron (ENSMUST00000039987.3/252838, intron 1 of 8)	4	6686353	6991557	305205	2	252838	20677	ENSMUSG00000041272	Tox	thymocyte selection-associated high mobility group box	252838	0	chr4:6970480-6970880	Tet_TH0	Open
Tox	1.39295e-112	1.43109e-110	6.51975	chr4	6950271	6950671	401	*	4.34992	3.24965	5.12512	-1.5343	4.02011e-05	0.000518441	Intron (ENSMUST00000039987.3/252838, intron 1 of 8)	4	6686353	6991557	305205	2	252838	40886	ENSMUSG00000041272	Tox	thymocyte selection-associated high mobility group box	252838	0	chr4:6950271-6950671	Tet_TH0	Open
Als2cl	9.13158e-216	3.00806e-213	-12.0261																										Tet_TH0
Cd74	6.03518e-58	2.42259e-56	7.68792																										Tet_TH0
Sell	9.90883e-36	2.24556e-34	-9.06377	chr1	164078390	164078790	401	*	4.61098	3.1089	5.5083	-2.07004	4.62072e-09	2.59243e-07	Intron (ENSMUST00000192047.5/20343, intron 7 of 7)	1	164061982	164084181	22200	1	20343	16408	ENSMUSG00000026581	Sell	selectin, lymphocyte	20339;20343;20344	30156;0;0	chr1:164078390-164078790	Tet_TH0	Open
Sell	9.90883e-36	2.24556e-34	-9.06377	chr1	164071176	164071576	401	*	3.76867	1.77149	4.7682	-2.41705	1.92966e-08	8.37404e-07	Intron (ENSMUST00000192047.5/20343, intron 5 of 7)	1	164061982	164084181	22200	1	20343	9194	ENSMUSG00000026581	Sell	selectin, lymphocyte	20339;20343;20344	22942;0;0	chr1:164071176-164071576	Tet_TH0	Open
Sell	9.90883e-36	2.24556e-34	-9.06377	chr1	164077007	164077407	401	*	4.04644	3.35624	4.63809	-1.07564	0.0012947	0.00930998	Intron (ENSMUST00000192047.5/20343, intron 7 of 7)	1	164061982	164084181	22200	1	20343	15025	ENSMUSG00000026581	Sell	selectin, lymphocyte	20339;20343;20344	28773;0;0	chr1:164077007-164077407	Tet_TH0	Open
Ttc39c	9.05384e-109	8.73927e-107	265.356	chr18	12643391	12643791	401	*	4.98115	5.52116	3.63992	1.71865	3.87798e-06	7.25993e-05	5' UTR	18	12599896	12738863	138968	1	72747	43495	ENSMUSG00000024424	Ttc39c	tetratricopeptide repeat domain 39C	72747	0	chr18:12643391-12643791	Tet_TH0	Closed
Asap2	1.34331e-83	8.87828e-82	4.15792																										Tet_TH0
Coro2b	2.12927e-99	1.85667e-97	433.639	chr9	62510503	62510903	401	*	4.52542	5.06476	3.18751	1.70491	7.29627e-06	0.000123673	Intron (ENSMUST00000048043.11/235431, intron 1 of 11)	9	62419492	62537044	117553	2	235431	26141	ENSMUSG00000041729	Coro2b	coronin, actin binding protein, 2B	235431	0	chr9:62510503-62510903	Tet_TH0	Closed
Tnfaip8	1.94401e-98	1.65345e-96	5.46384																										Tet_TH0
Zan	1.08409e-137	1.49988e-135	341.62																										Tet_TH0
Plekhg3	8.81175e-87	6.11606e-85	555.417																										Tet_TH0
Il9r	1.59619e-83	1.05161e-81	190.745	chr11	32196051	32196451	401	*	3.50882	4.00611	2.36083	1.33701	0.000913303	0.00698435	Intron (ENSMUST00000145401.7/16199, intron 1 of 8)	11	32187541	32200279	12739	2	16199	3828	ENSMUSG00000020279	Il9r	interleukin 9 receptor	16199;78372;13650;17168;268395	0;0;25849;0;0	chr11:32196051-32196451	Tet_TH0	Closed
Tubb2a	4.72884e-95	3.80378e-93	5.39253																										Tet_TH0
Itgal	2.22426e-147	3.41927e-145	4.35942																										Tet_TH0
Bmp7	3.38872e-126	3.9958e-124	27.0087	chr2	172913934	172914334	401	*	4.20354	3.49249	4.8065	-1.11044	0.00072541	0.00576535	Intron (ENSMUST00000009143.7/12162, intron 2 of 6)	2	172868012	172940321	72310	2	12162	25987	ENSMUSG00000008999	Bmp7	bone morphogenetic protein 7	12162	0	chr2:172913934-172914334	Tet_TH0	Open
Cdkn2c	4.42611e-96	3.64504e-94	20.9738																										Tet_TH0
AU020206	2.42961e-114	2.55948e-112	4.24165																										Tet_TH0
Sh3bgrl	1.09245e-133	1.40817e-131	4.94568																										Tet_TH0
Slc43a1	3.48474e-106	3.30223e-104	140.747																										Tet_TH0
2010007H06Rik	3.73765e-44	1.11128e-42	8.74105																										Tet_TH0
Rapgef5	3.32258e-63	1.5289e-61	11.9296																										Tet_TH0
Myo1h	6.17898e-75	3.48457e-73	12.5511																										Tet_TH0
Prnp	3.72815e-137	5.12386e-135	21.2933	chr2	131902988	131903388	401	*	5.01807	3.46529	5.92793	-2.18453	2.84501e-11	3.73994e-09	Distal Intergenic	2	131909928	131938429	28502	1	19122	-6540	ENSMUSG00000079037	Prnp	prion protein	71995;19122;111368;26434	-43241;-6540;0;0	chr2:131902988-131903388	Tet_TH0	Open
Il21	9.12383e-150	1.4454e-147	1259.32	chr3	37257641	37258041	401	*	4.4729	5.07905	2.75384	2.01822	3.10592e-07	8.6188e-06	Distal Intergenic	3	37222759	37232618	9860	2	60505	-25023	ENSMUSG00000027718	Il21	interleukin 21	60505;207175	0;0	chr3:37257641-37258041	Tet_TH0	Closed
Il21	9.12383e-150	1.4454e-147	1259.32	chr3	37259631	37260031	401	*	4.69686	5.23823	3.349	1.6572	3.55225e-05	0.000468333	Distal Intergenic	3	37222759	37232618	9860	2	60505	-27013	ENSMUSG00000027718	Il21	interleukin 21	60505;207175	0;0	chr3:37259631-37260031	Tet_TH0	Closed
Il21	9.12383e-150	1.4454e-147	1259.32	chr3	37232806	37233206	401	*	4.07278	4.68206	2.33257	1.72279	0.000313382	0.00285837	Promoter (<=1kb)	3	37222759	37232618	9860	2	60505	-188	ENSMUSG00000027718	Il21	interleukin 21	102639848;60505	49921;0	chr3:37232806-37233206	Tet_TH0	Closed
Il21	9.12383e-150	1.4454e-147	1259.32	chr3	37268326	37268726	401	*	3.89946	4.39362	2.76446	1.40085	0.000354485	0.00317775	Distal Intergenic	3	37222759	37232618	9860	2	60505	-35708	ENSMUSG00000027718	Il21	interleukin 21	60505;207175;14173;241950	0;0;0;0	chr3:37268326-37268726	Tet_TH0	Closed
Stx11	2.80664e-85	1.92232e-83	64.8521	chr10	12974545	12974945	401	*	3.85125	4.57307	0.954962	1.95938	0.000254429	0.0024093	Distal Intergenic	10	12938209	12964298	26090	2	74732	-10247	ENSMUSG00000039232	Stx11	syntaxin 11	74732;66125	0;0	chr10:12974545-12974945	Tet_TH0	Closed
Stx11	2.80664e-85	1.92232e-83	64.8521	chr10	12977696	12978096	401	*	3.95419	4.60904	1.85913	1.77692	0.000503352	0.00424695	Distal Intergenic	10	12938209	12964298	26090	2	74732	-13398	ENSMUSG00000039232	Stx11	syntaxin 11	74732;66125	0;0	chr10:12977696-12978096	Tet_TH0	Closed
Atp8b4	6.31948e-96	5.18372e-94	-28.8496	chr2	126499735	126500135	401	*	4.18623	3.32134	4.8654	-1.36113	4.36851e-05	0.000555808	Promoter (<=1kb)	2	126320973	126500674	179702	2	241633	539	ENSMUSG00000060131	Atp8b4	ATPase, class I, type 8B, member 4	241633	0	chr2:126499735-126500135	Tet_TH0	Open
Atp8b4	6.31948e-96	5.18372e-94	-28.8496	chr2	126467772	126468172	401	*	4.0452	2.97134	4.81069	-1.51035	7.14857e-05	0.000843658	Intron (ENSMUST00000040128.11/241633, intron 3 of 27)	2	126320973	126500674	179702	2	241633	32502	ENSMUSG00000060131	Atp8b4	ATPase, class I, type 8B, member 4	241633	0	chr2:126467772-126468172	Tet_TH0	Open
Atp8b4	6.31948e-96	5.18372e-94	-28.8496	chr2	126495818	126496218	401	*	4.40731	3.6377	5.04073	-1.18938	0.000232834	0.00223579	Intron (ENSMUST00000040128.11/241633, intron 1 of 27)	2	126320973	126500674	179702	2	241633	4456	ENSMUSG00000060131	Atp8b4	ATPase, class I, type 8B, member 4	241633	0	chr2:126495818-126496218	Tet_TH0	Open
Dst	1.2494e-114	1.32968e-112	9.71383																										Tet_TH0
Cpd	2.49144e-135	3.27246e-133	21.9259																										Tet_TH0
Hmox1	7.92752e-74	4.32947e-72	9.95259																										Tet_TH0
Arc	3.52959e-70	1.84974e-68	6.46421	chr15	74666536	74666936	401	*	4.7252	3.99445	5.33862	-1.12356	0.000430993	0.003738	Distal Intergenic	15	74669083	74672570	3488	2	11838	5634	ENSMUSG00000022602	Arc	activity regulated cytoskeletal-associated protein	69439;11838;16469;66769;72373	-30183;0;0;0;-47903	chr15:74666536-74666936	Tet_TH0	Open
Crybg1	9.20102e-124	1.04917e-121	-7.38378	chr10	44029530	44029930	401	*	4.46735	3.58869	5.15278	-1.32493	0.000105821	0.00116955	Intron (ENSMUST00000200401.1/11630, intron 2 of 21)	10	43950636	44148853	198218	2	11630	118923	ENSMUSG00000019866	Crybg1	crystallin beta-gamma domain containing 1	11630	0	chr10:44029530-44029930	Tet_TH0	Open
Crybg1	9.20102e-124	1.04917e-121	-7.38378	chr10	44071106	44071506	401	*	3.88685	2.99194	4.57955	-1.36816	0.000110617	0.00121103	Intron (ENSMUST00000200401.1/11630, intron 1 of 21)	10	43950636	44148853	198218	2	11630	77347	ENSMUSG00000019866	Crybg1	crystallin beta-gamma domain containing 1	11630	0	chr10:44071106-44071506	Tet_TH0	Open
Unc93b1	4.55355e-106	4.27601e-104	6.05123																										Tet_TH0
Gpr155	2.61612e-156	4.72108e-154	7.26773																										Tet_TH0
Angptl2	1.60492e-152	2.6434e-150	790.443	chr2	33215737	33216137	401	*	5.74722	6.35467	4.01944	2.14505	5.45812e-09	2.97422e-07	Promoter (<=1kb)	2	33216069	33247717	31649	1	26360	0	ENSMUSG00000004105	Angptl2	angiopoietin-like 2	241308;26360	0;0	chr2:33215737-33216137	Tet_TH0	Closed
Angptl2	1.60492e-152	2.6434e-150	790.443	chr2	33179900	33180300	401	*	3.82166	4.34858	2.54308	1.76917	3.00787e-05	0.000407755	Intron (ENSMUST00000139288.1/ENSMUST00000139288.1, intron 1 of 1)	2	33216069	33247717	31649	1	26360	-35769	ENSMUSG00000004105	Angptl2	angiopoietin-like 2	99326;241308;26360	0;0;0	chr2:33179900-33180300	Tet_TH0	Closed
Angptl2	1.60492e-152	2.6434e-150	790.443	chr2	33176513	33176913	401	*	3.77048	4.4342	1.59338	1.96564	0.000118015	0.00127728	Intron (ENSMUST00000131298.6/241308, intron 8 of 17)	2	33216069	33247717	31649	1	26360	-39156	ENSMUSG00000004105	Angptl2	angiopoietin-like 2	99326;241308;26360	0;0;0	chr2:33176513-33176913	Tet_TH0	Closed
Angptl2	1.60492e-152	2.6434e-150	790.443	chr2	33217409	33217809	401	*	3.83063	4.32863	2.67969	1.3674	0.000503643	0.00424841	Promoter (1-2kb)	2	33216069	33247717	31649	1	26360	1340	ENSMUSG00000004105	Angptl2	angiopoietin-like 2	241308;26360	0;0	chr2:33217409-33217809	Tet_TH0	Closed
Gpr18	1.27704e-38	3.17776e-37	-5.0886	chr14	121929336	121929736	401	*	5.67893	4.42399	6.50647	-1.89103	4.58117e-10	3.77595e-08	Intron (ENSMUST00000039803.6/68889, intron 4 of 8)	14	121911253	121915781	4529	2	110168	-13555	ENSMUSG00000050350	Gpr18	G protein-coupled receptor 18	78312;68889;110168;321019	0;0;0;0	chr14:121929336-121929736	Tet_TH0	Open
Gpr18	1.27704e-38	3.17776e-37	-5.0886	chr14	121898513	121898913	401	*	5.44576	3.90825	6.3519	-1.94986	9.04736e-06	0.000148193	Intron (ENSMUST00000039803.6/68889, intron 1 of 8)	14	121911253	121915781	4529	2	110168	16868	ENSMUSG00000050350	Gpr18	G protein-coupled receptor 18	78312;68889;110168	0;0;0	chr14:121898513-121898913	Tet_TH0	Open
Rnf128	2.79894e-127	3.37711e-125	102.267																										Tet_TH0
Cd83	1.15346e-102	1.04077e-100	32.9306	chr13	43774127	43774527	401	*	4.56053	5.23444	2.28223	2.4251	9.53721e-08	3.19257e-06	Distal Intergenic	13	43784775	43803132	18358	1	12522	-10248	ENSMUSG00000015396	Cd83	CD83 antigen	12522	0	chr13:43774127-43774527	Tet_TH0	Closed
Cd83	1.15346e-102	1.04077e-100	32.9306	chr13	43761150	43761550	401	*	3.70908	4.33425	1.856	1.86996	3.5806e-05	0.000470692	Distal Intergenic	13	43784775	43803132	18358	1	12522	-23225	ENSMUSG00000015396	Cd83	CD83 antigen	622552;12522	44359;0	chr13:43761150-43761550	Tet_TH0	Closed
Cd83	1.15346e-102	1.04077e-100	32.9306	chr13	43906204	43906604	401	*	4.45806	3.21033	5.28331	-1.81437	6.55577e-08	2.35192e-06	Distal Intergenic	13	43784775	43803132	18358	1	12522	121429	ENSMUSG00000015396	Cd83	CD83 antigen			chr13:43906204-43906604	Tet_TH0	Open
Ctsl	1.2894e-41	3.51629e-40	4.94436																										Tet_TH0
Xkr6	2.26206e-122	2.53754e-120	45.1299	chr14	63606105	63606505	401	*	4.05971	4.55191	2.93276	1.37968	0.000312902	0.00285543	Promoter (<=1kb)	14	63606503	63820809	214307	1	219149	0	ENSMUSG00000035067	Xkr6	X-linked Kx blood group related 6	219149	0	chr14:63606105-63606505	Tet_TH0	Closed
Nlrc4	2.06358e-128	2.54914e-126	44.1314																										Tet_TH0
Crybg3	5.24011e-155	9.13849e-153	17.6875																										Tet_TH0
Slc39a4	6.95516e-136	9.31228e-134	14.1173																										Tet_TH0
Stxbp1	2.51773e-80	1.55507e-78	8.439																										Tet_TH0
Rilpl2	3.13912e-201	9.04808e-199	7.03676																										Tet_TH0
Marcksl1	3.45055e-105	3.21118e-103	15.4226																										Tet_TH0
Chn2	5.24888e-204	1.55614e-201	34.0206	chr6	54127317	54127717	401	*	4.80352	3.74722	5.5624	-1.60302	1.33434e-06	2.95043e-05	Intron (ENSMUST00000046856.13/69993, intron 1 of 12)	6	54039554	54301810	262257	1	69993	87763	ENSMUSG00000004633	Chn2	chimerin 2	69993	0	chr6:54127317-54127717	Tet_TH0	Open
Prf1	1.01543e-80	6.34735e-79	-21.2927	chr10	61306182	61306582	401	*	5.041	2.90612	6.0623	-2.80541	2.39702e-15	1.48859e-12	Distal Intergenic	10	61297833	61304680	6848	1	18646	8349	ENSMUSG00000037202	Prf1	perforin 1 (pore forming protein)	237360;18646;27355	0;0;0	chr10:61306182-61306582	Tet_TH0	Open
Prf1	1.01543e-80	6.34735e-79	-21.2927	chr10	61297486	61297886	401	*	4.82798	3.29328	5.73344	-2.19228	3.40833e-11	4.35335e-09	Promoter (<=1kb)	10	61297833	61304680	6848	1	18646	0	ENSMUSG00000037202	Prf1	perforin 1 (pore forming protein)	237360;18646;27355	0;0;0	chr10:61297486-61297886	Tet_TH0	Open
Prf1	1.01543e-80	6.34735e-79	-21.2927	chr10	61297078	61297478	401	*	4.16372	3.03116	4.95047	-1.68361	1.86704e-06	3.89849e-05	Promoter (<=1kb)	10	61297833	61304680	6848	1	18646	-355	ENSMUSG00000037202	Prf1	perforin 1 (pore forming protein)	237360;18646;27355	0;0;0	chr10:61297078-61297478	Tet_TH0	Open
Serpina9	2.24926e-97	1.88221e-95	679.503																										Tet_TH0
Ccr4	2.39674e-27	3.96015e-26	6.90104	chr9	114496387	114496787	401	*	4.71658	3.8822	5.38159	-1.32004	1.70934e-05	0.000252125	5' UTR	9	114490316	114504916	14601	2	12773	8129	ENSMUSG00000047898	Ccr4	chemokine (C-C motif) receptor 4	12091;12773;636931	0;0;0	chr9:114496387-114496787	Tet_TH0	Open
Napsa	2.5358e-65	1.21537e-63	41.6145																										Tet_TH0
Unc119	1.11357e-82	7.19935e-81	5.79525																										Tet_TH0
Synpo	1.32832e-189	3.40328e-187	166.717	chr18	60632721	60633121	401	*	3.1865	3.82536	1.22753	1.7654	0.000156089	0.00160358	Intron (ENSMUST00000143275.2/104027, intron 1 of 2)	18	60593973	60648319	54347	2	104027	15198	ENSMUSG00000043079	Synpo	synaptopodin	170947;104027	-40933;0	chr18:60632721-60633121	Tet_TH0	Closed
Ascl2	3.68288e-92	2.79967e-90	341.661	chr7	142967350	142967750	401	*	3.91703	4.38373	2.89009	1.30925	0.000736091	0.00583992	Promoter (1-2kb)	7	142966829	142969264	2436	2	17173	1514	ENSMUSG00000009248	Ascl2	achaete-scute family bHLH transcription factor 2	21823;17173;27027	0;0;0	chr7:142967350-142967750	Tet_TH0	Closed
Ascl2	3.68288e-92	2.79967e-90	341.661	chr7	142969161	142969561	401	*	3.79853	4.26756	2.76279	1.24597	0.00102714	0.00770598	Promoter (<=1kb)	7	142966829	142969264	2436	2	17173	0	ENSMUSG00000009248	Ascl2	achaete-scute family bHLH transcription factor 2	21823;17173;27027	0;0;0	chr7:142969161-142969561	Tet_TH0	Closed
Gm35363	1.0239e-71	5.46248e-70	14.1232																										Tet_TH0
Chst2	4.98568e-180	1.16256e-177	799.522	chr9	95407130	95407530	401	*	5.33322	5.8206	4.22583	1.44839	5.53162e-05	0.00067978	Promoter (<=1kb)	9	95399292	95406722	7431	2	54371	-408	ENSMUSG00000033350	Chst2	carbohydrate sulfotransferase 2	54371;67958	0;0	chr9:95407130-95407530	Tet_TH0	Closed
Chst2	4.98568e-180	1.16256e-177	799.522	chr9	95151775	95152175	401	*	4.54462	5.12177	3.00564	1.59751	0.00066222	0.00533136	Intron (ENSMUST00000033463.9/331004, intron 14 of 15)	9	95399292	95406722	7431	2	54371	254547	ENSMUSG00000033350	Chst2	carbohydrate sulfotransferase 2	331004	0	chr9:95151775-95152175	Tet_TH0	Closed
Chst2	4.98568e-180	1.16256e-177	799.522	chr9	95315102	95315502	401	*	6.00164	5.0969	6.69866	-1.40669	3.47349e-05	0.000460307	Distal Intergenic	9	95399292	95406722	7431	2	54371	91220	ENSMUSG00000033350	Chst2	carbohydrate sulfotransferase 2			chr9:95315102-95315502	Tet_TH0	Open
Ryk	3.35122e-62	1.51521e-60	10.931																										Tet_TH0
Tnfrsf8	5.7025e-61	2.50199e-59	242.328	chr4	145283430	145283830	401	*	3.61307	4.18813	2.08614	1.6753	0.000230359	0.00221438	Intron (ENSMUST00000030339.12/21941, intron 10 of 12)	4	145267137	145315164	48028	2	21941	31334	ENSMUSG00000028602	Tnfrsf8	tumor necrosis factor receptor superfamily, member 8	21938;21941	0;0	chr4:145283430-145283830	Tet_TH0	Closed
Tnfrsf8	5.7025e-61	2.50199e-59	242.328	chr4	145315088	145315488	401	*	4.61383	5.04948	3.69784	1.23267	0.000639799	0.00517964	Promoter (<=1kb)	4	145267137	145315164	48028	2	21941	0	ENSMUSG00000028602	Tnfrsf8	tumor necrosis factor receptor superfamily, member 8	21941	0	chr4:145315088-145315488	Tet_TH0	Closed
Zfp839	1.60559e-60	6.95633e-59	5.31948																										Tet_TH0
Srxn1	3.81806e-81	2.4084e-79	57.6552	chr2	152105338	152105738	401	*	4.47357	5.01695	3.11568	1.61541	1.11359e-05	0.000176154	Promoter (<=1kb)	2	152105516	152111376	5861	1	76650	0	ENSMUSG00000032802	Srxn1	sulfiredoxin 1 homolog (S. cerevisiae)	545474;76650;21407	0;0;-37823	chr2:152105338-152105738	Tet_TH0	Closed
1500004A13Rik	9.3577e-94	7.38404e-92	7.71794																										Tet_TH0
Zfp870	1.93822e-85	1.33634e-83	36.3255																										Tet_TH0
Acvrl1	1.18101e-79	7.22994e-78	-21.4431	chr15	101134346	101134746	401	*	3.99381	2.53709	4.87944	-1.99975	1.55834e-07	4.83877e-06	5' UTR	15	101128522	101145336	16815	1	11482	5824	ENSMUSG00000000530	Acvrl1	activin A receptor, type II-like 1	208258;11482;11479	18591;0;0	chr15:101134346-101134746	Tet_TH0	Open
Acvrl1	1.18101e-79	7.22994e-78	-21.4431	chr15	101135355	101135755	401	*	4.54935	3.48022	5.31307	-1.60768	3.65206e-06	6.9343e-05	Exon (ENSMUST00000000542.13/11482, exon 4 of 11)	15	101128522	101145336	16815	1	11482	6833	ENSMUSG00000000530	Acvrl1	activin A receptor, type II-like 1	208258;11482;11479	19600;0;0	chr15:101135355-101135755	Tet_TH0	Open
Plscr1	3.76462e-193	9.8895e-191	62.6381																										Tet_TH0
Pbx3	4.91204e-57	1.92339e-55	8.89001																										Tet_TH0
Galm	7.9336e-96	6.4567e-94	4.27611	chr17	80131588	80131988	401	*	3.068	3.65862	1.4486	1.59766	0.000537574	0.00448102	Intron (ENSMUST00000039205.10/319625, intron 1 of 6)	17	80127471	80185101	57631	1	319625	4117	ENSMUSG00000035473	Galm	galactose mutarotase	319625	0	chr17:80131588-80131988	Tet_TH0	Closed
Smtn	8.77066e-93	6.74139e-91	438.03																										Tet_TH0
Padi4	1.33072e-64	6.33406e-63	20.0848																										Tet_TH0
Ttbk1	4.4625e-62	2.00455e-60	21.1089																										Tet_TH0
Mef2b	8.58588e-64	4.01312e-62	12.9699																										Tet_TH0
Cbfa2t3	2.07573e-80	1.2859e-78	251.898	chr8	122702211	122702611	401	*	3.05498	3.61021	1.63661	1.43981	0.00108354	0.00803873	Intron (ENSMUST00000127664.1/108148, intron 1 of 15)	8	122625141	122699109	73969	2	12398	-3102	ENSMUSG00000006362	Cbfa2t3	CBFA2/RUNX1 translocation partner 3	108148;12398	0;0	chr8:122702211-122702611	Tet_TH0	Closed
Sh3bp5	1.79764e-67	9.07698e-66	-4.24173	chr14	31433160	31433560	401	*	4.65584	2.63008	5.66009	-2.61179	8.60217e-13	1.85534e-10	Intron (ENSMUST00000140002.7/24056, intron 2 of 10)	14	31359880	31436078	76199	2	24056	2518	ENSMUSG00000021892	Sh3bp5	SH3-domain binding protein 5 (BTK-associated)	24056;67011	0;0	chr14:31433160-31433560	Tet_TH0	Open
Sh3bp5	1.79764e-67	9.07698e-66	-4.24173	chr14	31399271	31399671	401	*	5.56307	4.9389	6.1172	-0.996685	0.00131646	0.00944197	Intron (ENSMUST00000140002.7/24056, intron 3 of 10)	14	31359880	31436078	76199	2	24056	36407	ENSMUSG00000021892	Sh3bp5	SH3-domain binding protein 5 (BTK-associated)	12339;24056	0;0	chr14:31399271-31399671	Tet_TH0	Open
Nrbp2	1.33334e-40	3.50263e-39	19.1053																										Tet_TH0
Dnase1l3	1.48016e-42	4.1907e-41	19.4154																										Tet_TH0
Grtp1	9.65048e-44	2.83276e-42	13.9126																										Tet_TH0
Igsf9b	8.76126e-84	5.82765e-82	124.086	chr9	27298972	27299372	401	*	4.96647	5.41862	3.99287	1.35065	0.000105743	0.00116931	Promoter (<=1kb)	9	27299204	27357546	58343	1	235086	0	ENSMUSG00000034275	Igsf9b	immunoglobulin superfamily, member 9B	235086	0	chr9:27298972-27299372	Tet_TH0	Closed
Ier5l	3.80999e-43	1.0997e-41	23.2537	chr2	30474087	30474487	401	*	4.05357	4.55082	2.90575	1.43352	0.000170727	0.00172542	Promoter (<=1kb)	2	30471537	30474219	2683	2	72500	0	ENSMUSG00000089762	Ier5l	immediate early response 5-like	110854;72500	0;0	chr2:30474087-30474487	Tet_TH0	Closed
Ier5l	3.80999e-43	1.0997e-41	23.2537	chr2	30527535	30527935	401	*	3.95042	2.70278	4.77565	-1.76663	1.93753e-06	4.02932e-05	Distal Intergenic	2	30471537	30474219	2683	2	72500	-53316	ENSMUSG00000089762	Ier5l	immediate early response 5-like			chr2:30527535-30527935	Tet_TH0	Open
Ier5l	3.80999e-43	1.0997e-41	23.2537	chr2	30507369	30507769	401	*	3.30999	2.1898	4.09236	-1.45232	0.000550316	0.004569	Distal Intergenic	2	30471537	30474219	2683	2	72500	-33150	ENSMUSG00000089762	Ier5l	immediate early response 5-like	72500	0	chr2:30507369-30507769	Tet_TH0	Open
Axl	4.01515e-29	7.12192e-28	6.79365																										Tet_TH0
Casp3	5.82618e-100	5.12333e-98	6.05604																										Tet_TH0
Zcchc12	2.81176e-78	1.68649e-76	25.6901																										Tet_TH0
Nfil3	2.87865e-208	8.65807e-206	31.0838	chr13	52976620	52977020	401	*	3.76118	4.2519	2.64026	1.41345	0.000425431	0.00370046	Intron (ENSMUST00000071065.7/18030, intron 1 of 1)	13	52967209	52981073	13865	2	18030	4053	ENSMUSG00000056749	Nfil3	nuclear factor, interleukin 3, regulated	11992;18030	0;0	chr13:52976620-52977020	Tet_TH0	Closed
Adcy6	1.69841e-99	1.48722e-97	-10.8341																										Tet_TH0
Caskin2	2.09877e-78	1.26616e-76	33.6515																										Tet_TH0
Wls	2.44386e-141	3.49775e-139	14.7447																										Tet_TH0
Cd160	7.83628e-29	1.37122e-27	6.64262																										Tet_TH0
Farp1	3.05132e-156	5.45896e-154	129.531	chr14	121102564	121102964	401	*	4.352	5.004	2.28223	2.27963	2.92015e-07	8.19165e-06	Intron (ENSMUST00000135010.7/223254, intron 2 of 7)	14	121035200	121283744	248545	1	223254	67364	ENSMUSG00000025555	Farp1	FERM, RhoGEF (Arhgef) and pleckstrin domain protein 1 (chondrocyte-derived)	223254	0	chr14:121102564-121102964	Tet_TH0	Closed
Farp1	3.05132e-156	5.45896e-154	129.531	chr14	121035259	121035659	401	*	5.2845	5.80593	4.03126	1.56354	1.50086e-05	0.000226095	Promoter (<=1kb)	14	121035200	121283744	248545	1	223254	59	ENSMUSG00000025555	Farp1	FERM, RhoGEF (Arhgef) and pleckstrin domain protein 1 (chondrocyte-derived)	223254	0	chr14:121035259-121035659	Tet_TH0	Closed
Farp1	3.05132e-156	5.45896e-154	129.531	chr14	121099901	121100301	401	*	3.4698	4.02494	2.05187	1.61329	0.000233794	0.00224441	Intron (ENSMUST00000135010.7/223254, intron 1 of 7)	14	121035200	121283744	248545	1	223254	64701	ENSMUSG00000025555	Farp1	FERM, RhoGEF (Arhgef) and pleckstrin domain protein 1 (chondrocyte-derived)	223254	0	chr14:121099901-121100301	Tet_TH0	Closed
Farp1	3.05132e-156	5.45896e-154	129.531	chr14	121137266	121137666	401	*	3.84796	4.34785	2.6891	1.31189	0.000757988	0.00597354	Intron (ENSMUST00000135010.7/223254, intron 2 of 7)	14	121035200	121283744	248545	1	223254	102066	ENSMUSG00000025555	Farp1	FERM, RhoGEF (Arhgef) and pleckstrin domain protein 1 (chondrocyte-derived)	223254	0	chr14:121137266-121137666	Tet_TH0	Closed
Nacc2	4.11117e-66	2.017e-64	-18.0486																										Tet_TH0
Sostdc1	8.61763e-84	5.75053e-82	383.306																										Tet_TH0
Ly6a	1.14184e-21	1.45199e-20	-5.19219																										Tet_TH0
Fbn2	2.03181e-74	1.13656e-72	292.743	chr18	58352770	58353170	401	*	4.4333	3.36082	5.19827	-1.54607	1.26066e-05	0.000195385	Distal Intergenic	18	58008623	58210487	201865	2	14119	-142283	ENSMUSG00000024598	Fbn2	fibrillin 2			chr18:58352770-58353170	Tet_TH0	Open
Alcam	9.21784e-135	1.20313e-132	83.2431																										Tet_TH0
Krt83	2.05111e-29	3.70467e-28	39.6813																										Tet_TH0
Ston2	1.02618e-11	7.09638e-11	4.10327	chr12	91734649	91735049	401	*	4.15379	3.3018	4.82703	-1.18345	0.00104604	0.00781363	Intron (ENSMUST00000052969.14/108800, intron 3 of 6)	12	91633009	91786436	153428	2	108800	51387	ENSMUSG00000020961	Ston2	stonin 2	108800	0	chr12:91734649-91735049	Tet_TH0	Open
Fam20a	2.30845e-98	1.9554e-96	171.753																										Tet_TH0
Slc9a7	7.17571e-120	7.9635e-118	9.92563																										Tet_TH0
Igf1r	1.03629e-135	1.3786e-133	5.92566	chr7	67911823	67912223	401	*	3.17366	3.70339	1.8819	1.48704	0.000850097	0.00658062	Distal Intergenic	7	67952827	68233668	280842	1	16001	-40604	ENSMUSG00000005533	Igf1r	insulin-like growth factor I receptor	16001	0	chr7:67911823-67912223	Tet_TH0	Closed
Igf1r	1.03629e-135	1.3786e-133	5.92566	chr7	68070653	68071053	401	*	4.70294	3.88996	5.35774	-1.25866	0.000115546	0.00125508	Intron (ENSMUST00000005671.9/16001, intron 2 of 20)	7	67952827	68233668	280842	1	16001	117826	ENSMUSG00000005533	Igf1r	insulin-like growth factor I receptor	16001	0	chr7:68070653-68071053	Tet_TH0	Open
Egr2	1.62883e-49	5.51436e-48	5.05627																										Tet_TH0
Ntng2	4.40229e-60	1.88762e-58	4.06335																										Tet_TH0
Vsig10	2.22232e-87	1.5581e-85	75.3941																										Tet_TH0
Shtn1	2.81245e-80	1.73195e-78	205.74																										Tet_TH0
Camk1	1.15391e-63	5.38137e-62	7.9677																										Tet_TH0
Arhgap26	1.17715e-124	1.36477e-122	8.11317																										Tet_TH0
Susd2	1.32234e-38	3.28654e-37	5.7259																										Tet_TH0
Adpgk	2.21343e-90	1.62315e-88	-4.37971																										Tet_TH0
Rhbdl3	1.12908e-77	6.73325e-76	10.5597	chr11	80300599	80300999	401	*	4.43054	4.87413	3.4872	1.19401	0.000689254	0.0055096	Promoter (<=1kb)	11	80300912	80355955	55044	1	246104	0	ENSMUSG00000017692	Rhbdl3	rhomboid like 3	59040;246104	0;0	chr11:80300599-80300999	Tet_TH0	Closed
Jdp2	2.08709e-53	7.6122e-52	182.635																										Tet_TH0
AC140209.1	8.35287e-14	6.76081e-13	-4.52323																										Tet_TH0
Matn2	1.04866e-93	8.2124e-92	469.386																										Tet_TH0
Gm8798	2.57979e-75	1.45881e-73	169.179																										Tet_TH0
Usp28	1.36618e-81	8.67044e-80	-5.95415	chr9	48980406	48980806	401	*	3.9883	2.54433	4.87056	-1.99207	1.40239e-07	4.43482e-06	Distal Intergenic	9	48985375	49042517	57143	1	235323	-4569	ENSMUSG00000032267	Usp28	ubiquitin specific peptidase 28	57014;235323	-15416;0	chr9:48980406-48980806	Tet_TH0	Open
Cass4	5.93243e-64	2.79174e-62	62.5856	chr2	172393824	172394224	401	*	4.14246	4.67595	2.8329	1.57297	0.00010552	0.0011673	Promoter (<=1kb)	2	172393794	172433757	39964	1	320664	30	ENSMUSG00000074570	Cass4	Cas scaffolding protein family member 4	67017;20878;67337;320664;66404	0;0;0;0;0	chr2:172393824-172394224	Tet_TH0	Closed
Gabarapl1	3.79642e-77	2.23827e-75	8.27549																										Tet_TH0
Ptpn5	1.16854e-61	5.22643e-60	278.72	chr7	47111601	47112001	401	*	3.77735	4.41067	1.86226	2.09809	5.11262e-06	9.18035e-05	Intron (ENSMUST00000207045.1/ENSMUST00000207045.1, intron 2 of 2)	7	47077795	47133684	55890	2	19259	21683	ENSMUSG00000030854	Ptpn5	protein tyrosine phosphatase, non-receptor type 5	19259;102465639	0;-28377	chr7:47111601-47112001	Tet_TH0	Closed
Ptpn5	1.16854e-61	5.22643e-60	278.72	chr7	47110550	47110950	401	*	3.55575	4.15246	1.89823	1.82052	4.61657e-05	0.000583045	Exon (ENSMUST00000207045.1/ENSMUST00000207045.1, exon 1 of 3)	7	47077795	47133684	55890	2	19259	22734	ENSMUSG00000030854	Ptpn5	protein tyrosine phosphatase, non-receptor type 5	19259;102465639	0;-27326	chr7:47110550-47110950	Tet_TH0	Closed
Grn	6.71412e-77	3.92502e-75	8.71944																										Tet_TH0
Ldlr	1.2517e-89	8.95746e-88	-7.61641																										Tet_TH0
Cpeb1	3.3879e-38	8.33046e-37	59.4884																										Tet_TH0
Ifi208	3.9247e-106	3.70224e-104	-4.03489																										Tet_TH0
Sgk1	4.18183e-41	1.11406e-39	-5.32832	chr10	21911508	21911908	401	*	4.64975	3.61151	5.40174	-1.61339	2.79336e-07	7.8913e-06	Intron (ENSMUST00000120509.7/20393, intron 1 of 13)	10	21882184	21999903	117720	1	20393	29324	ENSMUSG00000019970	Sgk1	serum/glucocorticoid regulated kinase 1	20393	0	chr10:21911508-21911908	Tet_TH0	Open
Sgk1	4.18183e-41	1.11406e-39	-5.32832	chr10	21907083	21907483	401	*	4.92681	4.01578	5.6266	-1.43275	1.77558e-06	3.75099e-05	Intron (ENSMUST00000120509.7/20393, intron 1 of 13)	10	21882184	21999903	117720	1	20393	24899	ENSMUSG00000019970	Sgk1	serum/glucocorticoid regulated kinase 1	20393	0	chr10:21907083-21907483	Tet_TH0	Open
Jaml	1.15774e-83	7.67622e-82	-32.141																										Tet_TH0
Ifi214	6.22466e-98	5.25123e-96	-6.66324																										Tet_TH0
Creb3l2	2.83565e-71	1.50507e-69	6.67729	chr6	37398964	37399364	401	*	3.72436	4.23751	2.50825	1.35502	0.000806621	0.00628732	Intron (ENSMUST00000041093.5/208647, intron 1 of 11)	6	37327255	37442146	114892	2	208647	42782	ENSMUSG00000038648	Creb3l2	cAMP responsive element binding protein 3-like 2	208647	0	chr6:37398964-37399364	Tet_TH0	Closed
Csf1	1.50131e-94	1.19833e-92	11.0698	chr3	107796551	107796951	401	*	3.63061	4.10826	2.56178	1.34096	0.000865822	0.00666796	Distal Intergenic	3	107741048	107760469	19422	2	12977	-36082	ENSMUSG00000014599	Csf1	colony stimulating factor 1 (macrophage)	12977	0	chr3:107796551-107796951	Tet_TH0	Closed
Plxnb1	9.35687e-61	4.07948e-59	7.27326																										Tet_TH0
Sccpdh	4.71181e-92	3.56877e-90	227.902																										Tet_TH0
Chn1	1.41029e-69	7.33529e-68	380.872																										Tet_TH0
Gadd45b	1.14596e-100	1.01633e-98	15.133																										Tet_TH0
Il13ra1	1.37332e-76	7.93884e-75	183.987																										Tet_TH0
Cdc42bpb	2.02195e-46	6.41615e-45	-4.58564																										Tet_TH0
Pipox	1.03178e-48	3.42052e-47	57.7951																										Tet_TH0
Frmd4b	5.60257e-70	2.92872e-68	9.57411	chr6	97531025	97531425	401	*	3.78394	2.73934	4.53836	-1.52363	4.50487e-05	0.000570738	Intron (ENSMUST00000113355.8/232288, intron 1 of 23)	6	97286867	97617541	330675	2	232288	86116	ENSMUSG00000030064	Frmd4b	FERM domain containing 4B	232288	0	chr6:97531025-97531425	Tet_TH0	Open
Tmem140	7.03844e-133	8.96128e-131	11.0615																										Tet_TH0
Gemin8	1.16959e-119	1.29109e-117	6.97229																										Tet_TH0
Vipr2	8.9041e-56	3.38437e-54	178.057																										Tet_TH0
C030034L19Rik	3.674e-53	1.33298e-51	100.363																										Tet_TH0
Ecm1	2.43156e-115	2.65591e-113	-8.2979																										Tet_TH0
Col11a2	1.32734e-80	8.27213e-79	-17.414																										Tet_TH0
Ighd	1.26133e-30	2.36676e-29	5.53481																										Tet_TH0
Clip3	6.75941e-74	3.71106e-72	145.065																										Tet_TH0
Plek	7.38626e-42	2.03568e-40	9.55823																										Tet_TH0
Mpeg1	1.93232e-51	6.79686e-50	16.8997																										Tet_TH0
Ces2d-ps	9.49029e-67	4.71177e-65	223.687																										Tet_TH0
Plxnb2	2.779e-35	6.16161e-34	23.0405																										Tet_TH0
Fcrl1	2.1998e-69	1.14131e-67	19.6621																										Tet_TH0
Gm15411	2.40398e-60	1.03721e-58	44.4729																										Tet_TH0
2010300C02Rik	7.13147e-43	2.04419e-41	11.1762																										Tet_TH0
Chn1os3	6.58183e-54	2.42616e-52	123.353	chr2	73605105	73605505	401	*	3.91784	4.55309	1.98763	2.14494	1.33625e-06	2.95043e-05	Intron (ENSMUST00000147420.1/329427, intron 1 of 3)	2	73596526	73616012	19487	1	329427	8579	ENSMUSG00000086544	Chn1os3	chimerin 1, opposite strand 3	11435;102633437;329427;108699	0;0;0;0	chr2:73605105-73605505	Tet_TH0	Closed
Chn1os3	6.58183e-54	2.42616e-52	123.353	chr2	73592675	73593075	401	*	3.78444	4.3198	2.46583	1.60704	0.000141948	0.00148586	Distal Intergenic	2	73596526	73616012	19487	1	329427	-3451	ENSMUSG00000086544	Chn1os3	chimerin 1, opposite strand 3	11435;102633437;329427;108699	0;0;0;0	chr2:73592675-73593075	Tet_TH0	Closed
Ctla4	3.56639e-139	5.0009e-137	106.427	chr1	60913315	60913715	401	*	5.04202	5.68446	3.05376	2.24937	2.68386e-08	1.11314e-06	Exon (ENSMUST00000027164.8/12477, exon 3 of 4)	1	60887000	60915832	28833	1	12477	26315	ENSMUSG00000026011	Ctla4	cytotoxic T-lymphocyte-associated protein 4	12477	0	chr1:60913315-60913715	Tet_TH0	Closed
Ctla4	3.56639e-139	5.0009e-137	106.427	chr1	60902526	60902926	401	*	4.23935	4.97218	1.14976	2.3876	9.1868e-06	0.000149864	Intron (ENSMUST00000124816.1/12477, intron 3 of 3)	1	60887000	60915832	28833	1	12477	15526	ENSMUSG00000026011	Ctla4	cytotoxic T-lymphocyte-associated protein 4	12477	0	chr1:60902526-60902926	Tet_TH0	Closed
Ctla4	3.56639e-139	5.0009e-137	106.427	chr1	60910795	60911195	401	*	3.84921	4.41742	2.36083	1.71027	4.34793e-05	0.000553582	Intron (ENSMUST00000124816.1/12477, intron 3 of 3)	1	60887000	60915832	28833	1	12477	23795	ENSMUSG00000026011	Ctla4	cytotoxic T-lymphocyte-associated protein 4	12477	0	chr1:60910795-60911195	Tet_TH0	Closed
Ctla4	3.56639e-139	5.0009e-137	106.427	chr1	60813375	60813775	401	*	3.47057	2.12836	4.32452	-1.80832	1.69287e-05	0.000250002	Distal Intergenic	1	60887000	60915832	28833	1	12477	-73225	ENSMUSG00000026011	Ctla4	cytotoxic T-lymphocyte-associated protein 4	12487	0	chr1:60813375-60813775	Tet_TH0	Open
Rrm2	5.11087e-30	9.39467e-29	6.49932																										Tet_TH0
Nhsl1	5.8282e-36	1.33061e-34	5.26648	chr10	18407389	18407789	401	*	4.7222	3.6718	5.47885	-1.53754	9.33547e-06	0.000152083	5' UTR	10	18318985	18533892	214908	1	215819	88404	ENSMUSG00000039835	Nhsl1	NHS-like 1	215819	0	chr10:18407389-18407789	Tet_TH0	Open
Adamtsl2	9.45735e-47	3.02883e-45	145.259																										Tet_TH0
Zcchc18	3.28954e-44	9.79453e-43	6.90486																										Tet_TH0
Pfn2	1.25808e-76	7.29301e-75	6.92882																										Tet_TH0
Mettl7a1	5.68935e-43	1.6376e-41	4.10738																										Tet_TH0
Kdelc2	2.92986e-62	1.32758e-60	17.4483																										Tet_TH0
Mcf2l	3.20152e-23	4.38266e-22	19.2849																										Tet_TH0
Fam222a	4.9791e-65	2.37543e-63	5.59086																										Tet_TH0
Smpdl3a	9.72698e-85	6.59686e-83	4.49479																										Tet_TH0
Ctsb	2.37885e-78	1.43097e-76	5.13887																										Tet_TH0
St6galnac6	3.72655e-59	1.55295e-57	9.46661																										Tet_TH0
Mki67	5.60895e-40	1.44599e-38	17.732																										Tet_TH0
Etfbkmt	7.15464e-55	2.67051e-53	-4.41551																										Tet_TH0
Lrp1	6.57893e-19	7.32078e-18	5.49065																										Tet_TH0
Akap12	8.09533e-50	2.74963e-48	7.17581																										Tet_TH0
Ctnnbip1	1.73866e-47	5.6467e-46	22.0382																										Tet_TH0
Bcl2a1d	8.31902e-73	4.48428e-71	104.067																										Tet_TH0
Ldlrad3	1.51293e-41	4.10965e-40	39.8879	chr2	102039355	102039755	401	*	3.8818	2.96056	4.58602	-1.36651	0.000118276	0.00127933	Exon (ENSMUST00000140238.1/ENSMUST00000140238.1, exon 1 of 5)	2	101950203	102186385	236183	2	241576	146630	ENSMUSG00000048058	Ldlrad3	low density lipoprotein receptor class A domain containing 3	241576	0	chr2:102039355-102039755	Tet_TH0	Open
Ldlrad3	1.51293e-41	4.10965e-40	39.8879	chr2	102044292	102044692	401	*	4.12086	3.36539	4.7471	-1.2162	0.00031063	0.00284118	Intron (ENSMUST00000140238.1/ENSMUST00000140238.1, intron 1 of 4)	2	101950203	102186385	236183	2	241576	141693	ENSMUSG00000048058	Ldlrad3	low density lipoprotein receptor class A domain containing 3	241576	0	chr2:102044292-102044692	Tet_TH0	Open
Il1r1	3.32718e-12	2.39007e-11	8.19684																										Tet_TH0
Runx2	3.75472e-124	4.32899e-122	67.3896																										Tet_TH0
Vdr	3.49177e-77	2.06452e-75	70.3699																										Tet_TH0
Hivep3	4.33055e-44	1.28572e-42	4.39845																										Tet_TH0
A430093F15Rik	4.25763e-93	3.29696e-91	5.65013	chr19	10751572	10751972	401	*	4.5551	3.44216	5.33487	-1.66927	5.708e-07	1.44684e-05	Intron (ENSMUST00000186596.5/403202, intron 1 of 3)	19	10740947	10786043	45097	1	403202	10625	ENSMUSG00000067577	A430093F15Rik	RIKEN cDNA A430093F15 gene	107305;12507;403202;12511	0;0;0;0	chr19:10751572-10751972	Tet_TH0	Open
Il4	2.54294e-53	9.24231e-52	207.429	chr11	53609661	53610061	401	*	3.49743	3.98751	2.37914	1.47352	0.000438754	0.0037898	Intron (ENSMUST00000127858.1/16189, intron 2 of 3)	11	53602982	53618669	15688	2	16189	8608	ENSMUSG00000000869	Il4	interleukin 4	16568;16189;16163;19360	0;0;24641;0	chr11:53609661-53610061	Tet_TH0	Closed
Cd82	2.28149e-110	2.28733e-108	4.12384																										Tet_TH0
Ltk	7.65338e-38	1.84045e-36	26.4913																										Tet_TH0
Mid1	6.57017e-43	1.8859e-41	-5.04939																										Tet_TH0
Slc37a2	4.34024e-15	3.79734e-14	6.34172	chr9	37255566	37255966	401	*	4.38229	3.55858	5.04223	-1.28529	6.7627e-05	0.000804976	Promoter (<=1kb)	9	37227585	37255738	28154	2	56857	0	ENSMUSG00000032122	Slc37a2	solute carrier family 37 (glycerol-3-phosphate transporter), member 2	66279;56857;245902	0;0;92466	chr9:37255566-37255966	Tet_TH0	Open
Txlnb	9.77639e-54	3.59096e-52	62.2938																										Tet_TH0
Ampd1	1.33824e-59	5.62197e-58	-56.2794																										Tet_TH0
Fam129a	7.0664e-132	8.88781e-130	14.8131																										Tet_TH0
Gbp2b	9.30273e-293	6.22773e-290	77.2287																										Tet_TH0
Chst15	4.09633e-130	5.09049e-128	5.98009	chr7	132335297	132335697	401	*	4.72827	4.05357	5.31135	-1.11082	0.000236651	0.0022664	Intron (ENSMUST00000124096.7/14183, intron 2 of 6)	7	132235780	132317228	81449	2	77590	-18069	ENSMUSG00000030930	Chst15	carbohydrate sulfotransferase 15	14183;77590;100043682	0;0;0	chr7:132335297-132335697	Tet_TH0	Open
Gnaq	3.0245e-74	1.6873e-72	4.39006																										Tet_TH0
Palld	5.62072e-39	1.4139e-37	28.6973																										Tet_TH0
Raph1	1.532e-79	9.35105e-78	7.83537																										Tet_TH0
Esm1	1.06391e-25	1.64403e-24	30.7154	chr13	113183291	113183691	401	*	3.68655	4.28545	2.01503	1.712	4.33473e-05	0.000552486	Intron (ENSMUST00000122399.7/14945, intron 2 of 5)	13	113209659	113218098	8440	1	71690	-25968	ENSMUSG00000042379	Esm1	endothelial cell-specific molecule 1	76720;14945;71690	47208;0;0	chr13:113183291-113183691	Tet_TH0	Closed
Cntln	1.20838e-70	6.36487e-69	19.8901	chr4	84946455	84946855	401	*	3.96712	2.52526	4.84881	-1.94044	4.02894e-07	1.07336e-05	Intron (ENSMUST00000047023.12/338349, intron 2 of 25)	4	84884309	85131921	247613	1	338349	62146	ENSMUSG00000038070	Cntln	centlein, centrosomal protein	338349	0	chr4:84946455-84946855	Tet_TH0	Open
Luzp1	3.36428e-61	1.48551e-59	15.2089																										Tet_TH0
AC154639.1	1.12159e-47	3.66557e-46	162.573																										Tet_TH0
Gfra4	4.48271e-54	1.65828e-52	220.704																										Tet_TH0
Naip2	9.07779e-66	4.39141e-64	4.20346																										Tet_TH0
Ppm1j	1.50161e-34	3.23939e-33	-9.45214																										Tet_TH0
Col6a4	4.98876e-36	1.14273e-34	-19.5435																										Tet_TH0
Ttn	4.39566e-26	6.92659e-25	35.8021																										Tet_TH0
Arhgef16	9.3234e-54	3.43065e-52	5.95647																										Tet_TH0
Gstt3	4.52411e-49	1.51434e-47	116.153																										Tet_TH0
Pou2f2	2.39456e-175	5.28662e-173	7.84318																										Tet_TH0
Fam160a1	9.86108e-48	3.23297e-46	35.1605																										Tet_TH0
Caskin1	5.55186e-33	1.13515e-31	52.5458																										Tet_TH0
Ryr1	3.44063e-19	3.8912e-18	14.8935																										Tet_TH0
Kcnq5	1.302e-75	7.44363e-74	79.9532	chr1	21780828	21781228	401	*	4.12605	3.20485	4.83024	-1.36001	9.07347e-05	0.001027	Intron (ENSMUST00000029667.12/226922, intron 1 of 13)	1	21398403	21961942	563540	2	226922	180714	ENSMUSG00000028033	Kcnq5	potassium voltage-gated channel, subfamily Q, member 5	226922	0	chr1:21780828-21781228	Tet_TH0	Open
Gfi1	1.912e-59	7.99995e-58	4.11227																										Tet_TH0
Klhl4	8.14533e-39	2.03663e-37	10.9323	chrX	114474008	114474408	401	*	4.15515	3.24103	4.85628	-1.37779	4.23375e-05	0.00054134	Promoter (<=1kb)	20	114474333	114560829	86497	1	237010	0	ENSMUSG00000025597	Klhl4	kelch-like 4	237010	0	chrX:114474008-114474408	Tet_TH0	Open
Tbxa2r	6.30382e-67	3.14479e-65	-6.0803																										Tet_TH0
Pcyox1l	1.05691e-44	3.19274e-43	4.13925	chr18	61707516	61707916	401	*	5.68051	6.29022	3.93746	2.10864	6.24976e-10	4.92582e-08	Promoter (<=1kb)	18	61696837	61707635	10799	2	240334	0	ENSMUSG00000024579	Pcyox1l	prenylcysteine oxidase 1 like	328968;56069;240334;17714;68982;106877	-41979;0;0;0;0;78786	chr18:61707516-61707916	Tet_TH0	Closed
Gcnt1	1.49421e-76	8.61371e-75	493.656	chr19	17268656	17269056	401	*	4.0992	4.75589	1.98763	2.03142	4.7756e-05	0.000599764	Distal Intergenic	19	17326141	17372844	46704	2	14537	103788	ENSMUSG00000038843	Gcnt1	glucosaminyl (N-acetyl) transferase 1, core 2	353211	0	chr19:17268656-17269056	Tet_TH0	Closed
Bmf	1.27697e-25	1.96449e-24	27.8417																										Tet_TH0
Mthfsl	8.10704e-51	2.81347e-49	5.54684																										Tet_TH0
Dusp16	2.23006e-39	5.65775e-38	7.14539																										Tet_TH0
Trpm6	9.52552e-61	4.1443e-59	61.2816																										Tet_TH0
Slc24a3	7.05913e-41	1.86622e-39	113.467																										Tet_TH0
Gm15513	4.0747e-51	1.41883e-49	17.2923																										Tet_TH0
Zfp821	5.50876e-66	2.68996e-64	7.35272	chr8	109707924	109708324	401	*	4.43169	3.59733	5.09668	-1.2983	8.96965e-05	0.00101725	5' UTR	8	109705546	109724932	19387	1	75871	2378	ENSMUSG00000031728	Zfp821	zinc finger protein 821	244646;71955;75871;52335	0;0;0;0	chr8:109707924-109708324	Tet_TH0	Open
Gm37593	1.16852e-67	5.91471e-66	-83.5802																										Tet_TH0
Gal	7.86689e-37	1.84685e-35	98.9576																										Tet_TH0
Pax5	1.71909e-43	5.03191e-42	142.061																										Tet_TH0
Mid2	2.52631e-34	5.405e-33	35.9491																										Tet_TH0
Pmaip1	4.18094e-55	1.57187e-53	7.04162	chr18	66470596	66470996	401	*	4.47543	3.75759	5.08202	-1.13899	0.000327182	0.00296696	Distal Intergenic	18	66458533	66465565	7033	1	58801	12063	ENSMUSG00000024521	Pmaip1	phorbol-12-myristate-13-acetate-induced protein 1	58801;100503565	0;-33182	chr18:66470596-66470996	Tet_TH0	Open
Sh3gl3	1.7248e-45	5.31079e-44	43.6465																										Tet_TH0
Gch1	3.69133e-43	1.06694e-41	4.35208																										Tet_TH0
Grap2	4.38451e-54	1.62485e-52	-4.16772	chr15	80602491	80602891	401	*	4.96485	3.43827	5.8683	-2.16697	1.11144e-10	1.18046e-08	Intron (ENSMUST00000229980.1/17444, intron 1 of 7)	15	80572594	80652854	80261	1	17444	29897	ENSMUSG00000042351	Grap2	GRB2-related adaptor protein 2	383075;17444;102466773	0;0;-43182	chr15:80602491-80602891	Tet_TH0	Open
Grap2	4.38451e-54	1.62485e-52	-4.16772	chr15	80599396	80599796	401	*	4.60245	3.45095	5.39583	-1.77536	1.55967e-08	7.05749e-07	Intron (ENSMUST00000229980.1/17444, intron 1 of 7)	15	80572594	80652854	80261	1	17444	26802	ENSMUSG00000042351	Grap2	GRB2-related adaptor protein 2	383075;17444;102466773	0;0;-46277	chr15:80599396-80599796	Tet_TH0	Open
Grap2	4.38451e-54	1.62485e-52	-4.16772	chr15	80590664	80591064	401	*	3.91267	2.56792	4.76736	-1.87811	1.08965e-06	2.48091e-05	Intron (ENSMUST00000229980.1/17444, intron 1 of 7)	15	80572594	80652854	80261	1	17444	18070	ENSMUSG00000042351	Grap2	GRB2-related adaptor protein 2	383075;17444	0;0	chr15:80590664-80591064	Tet_TH0	Open
Myh3	4.04314e-37	9.53493e-36	48.8305																										Tet_TH0
Efhd2	3.56345e-158	6.54445e-156	4.79048																										Tet_TH0
Rapgef4	1.8195e-40	4.76168e-39	-36.629	chr2	72117694	72118094	401	*	5.21138	3.90334	6.05523	-1.92161	7.79911e-10	5.86464e-08	Intron (ENSMUST00000090826.11/56508, intron 4 of 30)	2	71981240	72257474	276235	1	56508	136454	ENSMUSG00000049044	Rapgef4	Rap guanine nucleotide exchange factor (GEF) 4	56508	0	chr2:72117694-72118094	Tet_TH0	Open
Rapgef4	1.8195e-40	4.76168e-39	-36.629	chr2	71941385	71941785	401	*	5.77071	4.8544	6.47279	-1.40741	3.81789e-05	0.000495379	Distal Intergenic	2	71981240	72257474	276235	1	56508	-39455	ENSMUSG00000049044	Rapgef4	Rap guanine nucleotide exchange factor (GEF) 4	228026;56508	0;0	chr2:71941385-71941785	Tet_TH0	Open
Gm20689	3.75914e-41	1.00533e-39	4.00533																										Tet_TH0
Hpn	7.5004e-26	1.16859e-24	8.69034																										Tet_TH0
Decr1	2.97727e-115	3.21809e-113	5.17274																										Tet_TH0
Map6	1.84117e-35	4.11744e-34	18.7931																										Tet_TH0
Lrfn4	1.34683e-29	2.44752e-28	22.9369																										Tet_TH0
Lax1	1.81566e-96	1.50121e-94	4.2588																										Tet_TH0
Rtn4rl1	9.35976e-37	2.19484e-35	-5.57296																										Tet_TH0
Wnt10a	1.86146e-16	1.76881e-15	9.08484																										Tet_TH0
Hip1	1.93601e-74	1.08589e-72	29.1151	chr5	135537760	135538160	401	*	3.99392	4.48118	2.88702	1.31423	0.0004289	0.00372523	Intron (ENSMUST00000060311.11/215114, intron 1 of 30)	5	135406531	135545120	138590	2	215114	6960	ENSMUSG00000039959	Hip1	huntingtin interacting protein 1	215114;541307;56221	0;25409;34889	chr5:135537760-135538160	Tet_TH0	Closed
Kcnc3	1.99386e-23	2.76966e-22	8.06993	chr7	44590568	44590968	401	*	4.89397	5.38212	3.78351	1.43108	5.86882e-05	0.000713188	Promoter (<=1kb)	7	44590664	44604754	14091	1	16504	0	ENSMUSG00000062785	Kcnc3	potassium voltage gated channel, Shaw-related subfamily, member 3	18971;22260;16541;16504;71960	0;0;0;0;79875	chr7:44590568-44590968	Tet_TH0	Closed
Pon3	1.73869e-57	6.89924e-56	23.9598																										Tet_TH0
Igkc	1.08678e-87	7.64542e-86	84.5638																										Tet_TH0
Nfatc1	7.39856e-90	5.33133e-88	5.26754	chr18	80684397	80684797	401	*	5.42309	6.1382	2.63235	3.05363	9.48734e-13	2.03407e-10	Intron (ENSMUST00000167977.7/18018, intron 2 of 9)	18	80606205	80713071	106867	2	18018	28274	ENSMUSG00000033016	Nfatc1	nuclear factor of activated T cells, cytoplasmic, calcineurin dependent 1	18018;50771	0;0	chr18:80684397-80684797	Tet_TH0	Closed
Nfatc1	7.39856e-90	5.33133e-88	5.26754	chr18	80671634	80672034	401	*	4.06847	4.64859	2.51224	1.85712	3.44601e-06	6.59171e-05	Intron (ENSMUST00000167977.7/18018, intron 3 of 9)	18	80606205	80713071	106867	2	18018	41037	ENSMUSG00000033016	Nfatc1	nuclear factor of activated T cells, cytoplasmic, calcineurin dependent 1	18018	0	chr18:80671634-80672034	Tet_TH0	Closed
Nfatc1	7.39856e-90	5.33133e-88	5.26754	chr18	80642456	80642856	401	*	3.23417	3.85001	1.4486	1.75606	0.000192701	0.00191104	Intron (ENSMUST00000167977.7/18018, intron 8 of 9)	18	80606205	80713071	106867	2	18018	70215	ENSMUSG00000033016	Nfatc1	nuclear factor of activated T cells, cytoplasmic, calcineurin dependent 1	18018	0	chr18:80642456-80642856	Tet_TH0	Closed
Nfatc1	7.39856e-90	5.33133e-88	5.26754	chr18	80738199	80738599	401	*	6.05627	4.61749	6.93715	-2.07682	1.15892e-10	1.20995e-08	Exon (ENSMUST00000225092.1/50771, exon 5 of 5)	18	80606205	80713071	106867	2	18018	-25128	ENSMUSG00000033016	Nfatc1	nuclear factor of activated T cells, cytoplasmic, calcineurin dependent 1	18018;50771	0;0	chr18:80738199-80738599	Tet_TH0	Open
Nckap5l	2.55248e-75	1.44731e-73	-5.08884																										Tet_TH0
Smim3	1.28377e-34	2.77234e-33	23.1988	chr18	60502320	60502720	401	*	3.89885	4.42686	2.61516	1.51899	0.000153397	0.00158225	Promoter (<=1kb)	18	60474191	60501987	27797	2	106878	-333	ENSMUSG00000038059	Smim3	small integral membrane protein 3	106878;67665	0;-23465	chr18:60502320-60502720	Tet_TH0	Closed
Fam83g	3.07788e-32	6.10079e-31	18.813																										Tet_TH0
Hid1	3.79836e-60	1.63204e-58	-10.4044																										Tet_TH0
Smad7	5.49949e-24	7.85485e-23	-6.07266	chr18	75419385	75419785	401	*	6.13208	4.74227	6.99959	-1.97758	1.57047e-08	7.08857e-07	Distal Intergenic	18	75367529	75395935	28407	1	17131	51856	ENSMUSG00000025880	Smad7	SMAD family member 7	17131;269037	0;0	chr18:75419385-75419785	Tet_TH0	Open
Smad7	5.49949e-24	7.85485e-23	-6.07266	chr18	75410206	75410606	401	*	4.70645	3.65113	5.46496	-1.62105	3.34019e-07	9.15602e-06	Distal Intergenic	18	75367529	75395935	28407	1	17131	42677	ENSMUSG00000025880	Smad7	SMAD family member 7	102636262;17131;269037	-43118;0;0	chr18:75410206-75410606	Tet_TH0	Open
Smad7	5.49949e-24	7.85485e-23	-6.07266	chr18	75424416	75424816	401	*	4.68493	4.01484	5.26544	-1.09053	0.0004352	0.00376568	Distal Intergenic	18	75367529	75395935	28407	1	17131	56887	ENSMUSG00000025880	Smad7	SMAD family member 7	17131;269037	0;0	chr18:75424416-75424816	Tet_TH0	Open
Mapk8ip1	5.27799e-41	1.40069e-39	29.3133																										Tet_TH0
Dmwd	1.02097e-35	2.3106e-34	17.9218	chr7	19075911	19076311	401	*	4.36433	4.8259	3.35646	1.31111	0.000280146	0.00260339	Promoter (<=1kb)	7	19076227	19082776	6550	1	13401	0	ENSMUSG00000030410	Dmwd	dystrophia myotonica-containing WD repeat motif	68188;83434;13401;13400;100526504;20475;243866;243867	0;21221;0;0;-10517;-18283;42057;0	chr7:19075911-19076311	Tet_TH0	Closed
Ccdc50-ps	3.53848e-61	1.55911e-59	9.93882																										Tet_TH0
Epdr1	7.63372e-49	2.53882e-47	181.119																										Tet_TH0
Gm37387	8.99725e-59	3.69012e-57	-4.63405																										Tet_TH0
Pcdhgc3	7.83337e-23	1.04746e-21	5.2957																										Tet_TH0
Tnfsf13b	4.78293e-61	2.10297e-59	57.752	chr8	10006337	10006737	401	*	3.87926	4.41067	2.57952	1.50462	0.000208597	0.00204114	Promoter (<=1kb)	8	10006467	10039072	32606	1	24099	0	ENSMUSG00000031497	Tnfsf13b	tumor necrosis factor (ligand) superfamily, member 13b	319583;68904;24099	0;0;0	chr8:10006337-10006737	Tet_TH0	Closed
S100a4	3.16216e-41	8.50056e-40	45.0595																										Tet_TH0
Twsg1	5.46998e-74	3.01911e-72	5.03987	chr17	65957582	65957982	401	*	4.44791	3.49655	5.16496	-1.48551	5.56661e-06	9.87703e-05	Distal Intergenic	17	65921972	65951226	29255	2	65960	-6356	ENSMUSG00000024098	Twsg1	twisted gastrulation BMP signaling modulator 1	65960;106585	0;0	chr17:65957582-65957982	Tet_TH0	Open
Kif15	3.64218e-34	7.73655e-33	14.7131																										Tet_TH0
Arhgap29	5.83817e-61	2.55073e-59	-16.4035																										Tet_TH0
Vipr1	9.32268e-25	1.38294e-23	-11.8117																										Tet_TH0
Plcxd2	8.44843e-67	4.20456e-65	-4.70591	chr16	45998232	45998632	401	*	3.99553	2.12551	4.97268	-2.37379	4.24488e-09	2.41161e-07	Intron (ENSMUST00000130481.1/433022, intron 1 of 3)	16	45959263	46010218	50956	2	433022	11586	ENSMUSG00000087141	Plcxd2	phosphatidylinositol-specific phospholipase C, X domain containing 2	208177;100503378;433022;84544	0;52626;0;0	chr16:45998232-45998632	Tet_TH0	Open
Plcxd2	8.44843e-67	4.20456e-65	-4.70591	chr16	46008783	46009183	401	*	4.81511	3.57664	5.63742	-1.86022	4.92682e-09	2.73435e-07	Promoter (1-2kb)	16	45959263	46010218	50956	2	433022	1035	ENSMUSG00000087141	Plcxd2	phosphatidylinositol-specific phospholipase C, X domain containing 2	100503378;433022;84544	63177;0;0	chr16:46008783-46009183	Tet_TH0	Open
Plcxd2	8.44843e-67	4.20456e-65	-4.70591	chr16	46006227	46006627	401	*	5.44716	4.62397	6.10686	-1.32626	6.48425e-06	0.000112071	Intron (ENSMUST00000130481.1/433022, intron 1 of 3)	16	45959263	46010218	50956	2	433022	3591	ENSMUSG00000087141	Plcxd2	phosphatidylinositol-specific phospholipase C, X domain containing 2	100503378;433022;84544	60621;0;0	chr16:46006227-46006627	Tet_TH0	Open
Plcxd2	8.44843e-67	4.20456e-65	-4.70591	chr16	46022450	46022850	401	*	4.70747	3.84515	5.38546	-1.32953	5.62391e-05	0.00068739	Distal Intergenic	16	45959263	46010218	50956	2	433022	-12232	ENSMUSG00000087141	Plcxd2	phosphatidylinositol-specific phospholipase C, X domain containing 2	433022;84544	0;0	chr16:46022450-46022850	Tet_TH0	Open
Ptms	3.20267e-110	3.19543e-108	8.49978																										Tet_TH0
Cttn	1.92522e-65	9.24862e-64	12.9822																										Tet_TH0
Gpr68	1.40746e-75	8.02447e-74	4.06503	chr12	100871203	100871603	401	*	3.48204	4.08529	1.78217	1.76817	7.82929e-05	0.000910569	3' UTR	12	100876682	100908198	31517	2	238377	36595	ENSMUSG00000047415	Gpr68	G protein-coupled receptor 68	217830;238377;68339	0;0;0	chr12:100871203-100871603	Tet_TH0	Closed
Gpr68	1.40746e-75	8.02447e-74	4.06503	chr12	100906845	100907245	401	*	4.31245	3.59056	4.92119	-1.10186	0.000977258	0.00739338	Promoter (<=1kb)	12	100876682	100908198	31517	2	238377	953	ENSMUSG00000047415	Gpr68	G protein-coupled receptor 68	217830;238377;68339	0;0;0	chr12:100906845-100907245	Tet_TH0	Open
Acadl	2.55971e-55	9.65849e-54	4.15396																										Tet_TH0
Nedd4l	2.41904e-49	8.16299e-48	-12.4167	chr18	64931182	64931582	401	*	4.79032	3.26633	5.69312	-2.11984	6.6244e-10	5.19835e-08	Intron (ENSMUST00000235343.1/83814, intron 1 of 30)	18	64887705	65217828	330124	1	83814	43477	ENSMUSG00000024589	Nedd4l	neural precursor cell expressed, developmentally down-regulated gene 4-like	83814	0	chr18:64931182-64931582	Tet_TH0	Open
Nedd4l	2.41904e-49	8.16299e-48	-12.4167	chr18	64886987	64887387	401	*	4.44042	3.67763	5.07038	-1.21878	0.000176701	0.00177584	Promoter (<=1kb)	18	64887705	65217828	330124	1	83814	-318	ENSMUSG00000024589	Nedd4l	neural precursor cell expressed, developmentally down-regulated gene 4-like	83814	0	chr18:64886987-64887387	Tet_TH0	Open
Nedd4l	2.41904e-49	8.16299e-48	-12.4167	chr18	64913294	64913694	401	*	3.76727	2.88115	4.45604	-1.30079	0.000633927	0.00513919	Intron (ENSMUST00000235343.1/83814, intron 1 of 30)	18	64887705	65217828	330124	1	83814	25589	ENSMUSG00000024589	Nedd4l	neural precursor cell expressed, developmentally down-regulated gene 4-like	83814	0	chr18:64913294-64913694	Tet_TH0	Open
Slc2a6	6.72073e-20	7.85776e-19	28.7329																										Tet_TH0
Gpr45	1.25668e-59	5.29005e-58	17.9426																										Tet_TH0
Ppp1r3b	4.04774e-35	8.92697e-34	-4.94304	chr8	35366568	35366968	401	*	3.89032	1.01232	4.99597	-3.0488	1.33941e-10	1.35899e-08	Distal Intergenic	8	35375739	35388139	12401	1	244416	-8771	ENSMUSG00000046794	Ppp1r3b	protein phosphatase 1, regulatory subunit 3B	244416	0	chr8:35366568-35366968	Tet_TH0	Open
Ppp1r3b	4.04774e-35	8.92697e-34	-4.94304	chr8	35323564	35323964	401	*	4.83312	2.40401	5.89369	-2.70649	1.11861e-08	5.43007e-07	Distal Intergenic	8	35375739	35388139	12401	1	244416	-51775	ENSMUSG00000046794	Ppp1r3b	protein phosphatase 1, regulatory subunit 3B			chr8:35323564-35323964	Tet_TH0	Open
Ppp1r3b	4.04774e-35	8.92697e-34	-4.94304	chr8	35321472	35321872	401	*	4.00615	2.91919	4.77648	-1.58552	1.38311e-05	0.000210826	Distal Intergenic	8	35375739	35388139	12401	1	244416	-53867	ENSMUSG00000046794	Ppp1r3b	protein phosphatase 1, regulatory subunit 3B			chr8:35321472-35321872	Tet_TH0	Open
Ppp1r3b	4.04774e-35	8.92697e-34	-4.94304	chr8	35347945	35348345	401	*	4.04711	2.09411	5.03912	-2.06268	3.72649e-05	0.000486497	Distal Intergenic	8	35375739	35388139	12401	1	244416	-27394	ENSMUSG00000046794	Ppp1r3b	protein phosphatase 1, regulatory subunit 3B	244416	0	chr8:35347945-35348345	Tet_TH0	Open
Adh1	2.61127e-17	2.62429e-16	-4.8585																										Tet_TH0
Bcl2l15	9.80514e-24	1.38144e-22	9.78085	chr3	103829080	103829480	401	*	2.46172	3.20475	0	1.62835	0.00128307	0.00924111	Intron (ENSMUST00000199710.1/67489, intron 9 of 13)	3	103832601	103854618	22018	1	229672	-3121	ENSMUSG00000044165	Bcl2l15	BCLl2-like 15	15257;140917;100503157;67489;229672;19260	0;0;25951;0;0;0	chr3:103829080-103829480	Tet_TH0	Closed
Top2a	4.19794e-22	5.39776e-21	4.10961																										Tet_TH0
Cpne7	3.37406e-50	1.16315e-48	169.618																										Tet_TH0
Sept8	4.1267e-34	8.73892e-33	4.03872																										Tet_TH0
Zfp629	2.2361e-66	1.10753e-64	-17.3957	chr7	127628681	127629081	401	*	4.72672	3.40613	5.57433	-1.91397	2.77275e-08	1.13879e-06	Distal Intergenic	7	127607031	127615797	8767	2	320683	-12884	ENSMUSG00000045639	Zfp629	zinc finger protein 629	68961;233899;233900;68232;320683;12055	0;0;0;-24236;-12884;0	chr7:127628681-127629081	Tet_TH0	Open
Flt3l	1.24609e-63	5.79824e-62	-5.86687	chr7	45136170	45136570	401	*	6.09096	5.41945	6.67226	-1.11182	0.000276382	0.00257568	Promoter (<=1kb)	7	45125922	45136432	10511	2	14256	0	ENSMUSG00000110206	Flt3l	FMS-like tyrosine kinase 3 ligand	52377;14132;387168;27207;27212;22121;14256;27211;27210;27208;100628629;27209;69748;68845;72961;102465638;100039953;114640;384619	0;-32319;0;0;-13059;0;0;-9735;-9500;-9223;-9179;-8706;0;0;-27379;-36733;42999;-44425;0	chr7:45136170-45136570	Tet_TH0	Open
Trps1	5.59985e-72	3.00294e-70	13.508																										Tet_TH0
Slc9b2	7.65625e-58	3.05558e-56	22.6489																										Tet_TH0
Sh3rf2	7.06436e-64	3.31689e-62	207.508																										Tet_TH0
Map2	1.20522e-31	2.34413e-30	50.0056																										Tet_TH0
Sgk3	2.93749e-67	1.47607e-65	-12.4095	chr1	9848097	9848497	401	*	5.77871	5.16931	6.32406	-1.01419	0.000677233	0.00543583	5' UTR	1	9798107	9900845	102739	1	170755	49990	ENSMUSG00000025915	Sgk3	serum/glucocorticoid regulated kinase 3	170755	0	chr1:9848097-9848497	Tet_TH0	Open
Abat	2.21415e-33	4.57671e-32	45.5902																										Tet_TH0
Gbp11	5.37537e-59	2.22665e-57	-45.7333																										Tet_TH0
Il12rb1	2.33736e-90	1.70201e-88	11.5513																										Tet_TH0
Gm17173	2.23001e-37	5.30728e-36	9.08449																										Tet_TH0
Klhdc1	8.2888e-44	2.43651e-42	-6.85606	chr12	69257817	69258217	401	*	5.40198	2.87832	6.47338	-3.12064	1.15768e-17	1.81297e-14	Exon (ENSMUST00000063445.12/271005, exon 7 of 13)	12	69241832	69284632	42801	1	271005	15985	ENSMUSG00000051890	Klhdc1	kelch domain containing 1	18974;271005;69554	0;0;0	chr12:69257817-69258217	Tet_TH0	Open
Padi2	9.92349e-24	1.39622e-22	-5.09795																										Tet_TH0
Igfbp4	6.25175e-26	9.77713e-25	-43.5096																										Tet_TH0
Pdcd1lg2	5.51428e-57	2.15109e-55	24.2597	chr19	29418577	29418977	401	*	5.22868	4.4811	5.85086	-1.19148	0.000145436	0.00151313	Intron (ENSMUST00000112576.3/58205, intron 1 of 5)	19	29410919	29471161	60243	1	58205	7658	ENSMUSG00000016498	Pdcd1lg2	programmed cell death 1 ligand 2	102465114;60533;58205;77779	0;0;0;0	chr19:29418577-29418977	Tet_TH0	Open
Ugcg	8.28649e-88	5.8493e-86	-4.07054	chr4	59167169	59167569	401	*	4.66526	3.13425	5.56981	-2.09095	2.79452e-09	1.72061e-07	Distal Intergenic	4	59189257	59222833	33577	1	22234	-21688	ENSMUSG00000028381	Ugcg	UDP-glucose ceramide glucosyltransferase	100155;22234	-28186;0	chr4:59167169-59167569	Tet_TH0	Open
Gpr146	6.52295e-82	4.19105e-80	-9.74957	chr5	139388584	139388984	401	*	4.10456	2.6012	5.00221	-2.06704	1.85689e-08	8.09726e-07	Intron (ENSMUST00000138631.1/80290, intron 1 of 1)	5	139377697	139396415	18719	1	80290	10887	ENSMUSG00000044197	Gpr146	G protein-coupled receptor 146	68033;545817;73212;723898;80290;319772;76854	0;35967;0;-18839;0;-16296;-34167	chr5:139388584-139388984	Tet_TH0	Open
Gpr146	6.52295e-82	4.19105e-80	-9.74957	chr5	139377463	139377863	401	*	4.80113	4.07005	5.41472	-1.1781	0.000158042	0.00162041	Promoter (<=1kb)	5	139377697	139396415	18719	1	80290	0	ENSMUSG00000044197	Gpr146	G protein-coupled receptor 146	68033;545817;73212;723898;80290;319772;76854	0;24846;0;-7718;0;-27417;-45288	chr5:139377463-139377863	Tet_TH0	Open
Gpr146	6.52295e-82	4.19105e-80	-9.74957	chr5	139382180	139382580	401	*	5.25327	4.58051	5.83527	-1.11282	0.000212612	0.00207087	Intron (ENSMUST00000138631.1/80290, intron 1 of 1)	5	139377697	139396415	18719	1	80290	4483	ENSMUSG00000044197	Gpr146	G protein-coupled receptor 146	68033;545817;73212;723898;80290;319772;76854	0;29563;0;-12435;0;-22700;-40571	chr5:139382180-139382580	Tet_TH0	Open
Sall2	1.00411e-58	4.1101e-57	4.24767																										Tet_TH0
Susd4	6.35395e-37	1.49505e-35	4.42502																										Tet_TH0
Gna14	1.4977e-36	3.50414e-35	96.3288																										Tet_TH0
Ubxn11	1.30732e-53	4.79342e-52	-6.87169																										Tet_TH0
Irf5	1.50755e-41	4.10041e-40	7.1395																										Tet_TH0
Csf1r	9.46966e-24	1.33781e-22	12.8403																										Tet_TH0
Ifit1bl1	6.47488e-34	1.35977e-32	-6.75712																										Tet_TH0
Lancl3	2.12074e-68	1.08403e-66	111.612																										Tet_TH0
Gm21188	1.04322e-20	1.2646e-19	35.6893																										Tet_TH0
Litaf	2.75279e-42	7.69929e-41	15.2489																										Tet_TH0
Sptbn2	6.075e-46	1.89871e-44	76.0166																										Tet_TH0
Adgrg3	1.04353e-46	3.33175e-45	-32.369	chr8	95020454	95020854	401	*	5.10527	3.82611	5.94034	-1.90142	3.06769e-09	1.85084e-07	Exon (ENSMUST00000212558.1/54672, exon 1 of 2)	8	95017692	95045250	27559	1	54672	2762	ENSMUSG00000060470	Adgrg3	adhesion G protein-coupled receptor G3	14766;54672;330830	45703;0;-34249	chr8:95020454-95020854	Tet_TH0	Open
Acot7	7.85581e-46	2.44059e-44	6.76191	chr4	152185527	152185927	401	*	5.3609	5.84244	4.27677	1.4259	3.7014e-05	0.000484075	Exon (ENSMUST00000124548.7/70025, exon 1 of 3)	4	152178134	152271855	93722	1	70025	7393	ENSMUSG00000028937	Acot7	acyl-CoA thioesterase 7	56226;15206;70025	0;26660;0	chr4:152185527-152185927	Tet_TH0	Closed
Hmgb3	1.15794e-47	3.77841e-46	4.65611																										Tet_TH0
Tlr9	1.17692e-23	1.64698e-22	20.6357																										Tet_TH0
Slc7a10	4.72978e-18	5.00291e-17	34.3598	chr7	35185272	35185672	401	*	3.68598	4.17845	2.55793	1.27744	0.000962017	0.00729186	Promoter (<=1kb)	7	35186385	35201114	14730	1	53896	-713	ENSMUSG00000030495	Slc7a10	solute carrier family 7 (cationic amino acid transporter, y+ system), member 10	53896;435965	-713;29826	chr7:35185272-35185672	Tet_TH0	Closed
Slc7a10	4.72978e-18	5.00291e-17	34.3598	chr7	35171834	35172234	401	*	3.86666	4.30207	2.95147	1.1526	0.00139556	0.0098775	Distal Intergenic	7	35186385	35201114	14730	1	53896	-14151	ENSMUSG00000030495	Slc7a10	solute carrier family 7 (cationic amino acid transporter, y+ system), member 10	12606;53896;435965	0;-14151;43264	chr7:35171834-35172234	Tet_TH0	Closed
Ppm1l	6.43501e-35	1.41169e-33	-6.76398	chr3	69399312	69399712	401	*	3.95212	2.179	4.91058	-2.18926	1.68745e-07	5.1596e-06	Intron (ENSMUST00000029355.8/242083, intron 1 of 3)	3	69316861	69560802	243942	1	242083	82451	ENSMUSG00000027784	Ppm1l	protein phosphatase 1 (formerly 2C)-like	242083	0	chr3:69399312-69399712	Tet_TH0	Open
Ppm1l	6.43501e-35	1.41169e-33	-6.76398	chr3	69402271	69402671	401	*	4.05802	2.69022	4.91934	-1.92183	3.26233e-07	8.95625e-06	Intron (ENSMUST00000029355.8/242083, intron 1 of 3)	3	69316861	69560802	243942	1	242083	85410	ENSMUSG00000027784	Ppm1l	protein phosphatase 1 (formerly 2C)-like	242083	0	chr3:69402271-69402671	Tet_TH0	Open
B930095G15Rik	7.57496e-64	3.54861e-62	67.4617																										Tet_TH0
Fam171b	2.89958e-29	5.19646e-28	23.9013																										Tet_TH0
Cdkn1a	2.10041e-38	5.18309e-37	62.0699																										Tet_TH0
Fcmr	1.18354e-31	2.30413e-30	62.2935																										Tet_TH0
Abcb1a	6.68072e-55	2.49811e-53	6.08091	chr5	8669592	8669992	401	*	4.37052	3.30899	5.13137	-1.57925	1.62726e-06	3.48053e-05	Exon (ENSMUST00000197663.1/ENSMUST00000197663.1, exon 1 of 1)	5	8660077	8748575	88499	1	18671	9515	ENSMUSG00000040584	Abcb1a	ATP-binding cassette, sub-family B (MDR/TAP), member 1A	242819;18671	0;0	chr5:8669592-8669992	Tet_TH0	Open
Scn1b	1.56861e-26	2.50796e-25	5.73158																										Tet_TH0
Tmod1	3.82573e-30	7.06365e-29	68.7098																										Tet_TH0
Galnt9	4.39552e-76	2.51989e-74	5.95403																										Tet_TH0
Dram1	2.98829e-28	5.1042e-27	31.2853																										Tet_TH0
E130308A19Rik	1.76302e-45	5.42045e-44	4.07379	chr4	59682483	59682883	401	*	4.25505	4.98056	1.29694	2.33661	1.47899e-05	0.000223362	Intron (ENSMUST00000070150.10/230259, intron 1 of 3)	4	59626211	59761439	135229	1	230259	56272	ENSMUSG00000045071	E130308A19Rik	RIKEN cDNA E130308A19 gene	230259	0	chr4:59682483-59682883	Tet_TH0	Closed
Ispd	2.58363e-44	7.72595e-43	151.498																										Tet_TH0
Slamf7	3.03576e-36	7.02354e-35	16.4558																										Tet_TH0
Plagl1	1.74041e-28	2.9974e-27	13.387	chr10	13056954	13057354	401	*	3.88448	4.56263	1.56168	1.69292	0.000966379	0.00732029	Distal Intergenic	10	13060504	13131694	71191	1	22634	-3150	ENSMUSG00000019817	Plagl1	pleiomorphic adenoma gene-like 1	66125;22634	0;0	chr10:13056954-13057354	Tet_TH0	Closed
Plagl1	1.74041e-28	2.9974e-27	13.387	chr10	13090535	13090935	401	*	4.81208	5.26232	3.84528	1.19895	0.00101258	0.00762218	5' UTR	10	13060504	13131694	71191	1	22634	30031	ENSMUSG00000019817	Plagl1	pleiomorphic adenoma gene-like 1	22634	0	chr10:13090535-13090935	Tet_TH0	Closed
Xdh	2.19542e-92	1.68124e-90	6.37151	chr17	73905048	73905448	401	*	3.24236	2.18627	4.00116	-1.36278	0.000832918	0.0064657	Intron (ENSMUST00000024866.5/22436, intron 24 of 35)	17	73883895	73950196	66302	2	22436	44748	ENSMUSG00000024066	Xdh	xanthine dehydrogenase	22436	0	chr17:73905048-73905448	Tet_TH0	Open
Gdpd5	3.14428e-44	9.38894e-43	4.86575	chr7	99393916	99394316	401	*	3.21208	3.83614	1.36734	1.74884	0.000182332	0.00182327	Intron (ENSMUST00000037528.9/233552, intron 2 of 17)	7	99381414	99461877	80464	1	233552	12502	ENSMUSG00000035314	Gdpd5	glycerophosphodiester phosphodiesterase domain containing 5	12406;233552	-40677;0	chr7:99393916-99394316	Tet_TH0	Closed
Igkv3-12	3.62283e-35	7.99836e-34	92.7259																										Tet_TH0
Cacna1g	1.50346e-34	3.24001e-33	89.8905																										Tet_TH0
Zfp518b	4.64987e-44	1.37853e-42	6.33733																										Tet_TH0
Vangl1	4.91421e-32	9.66679e-31	80.4563																										Tet_TH0
Alms1	2.01411e-57	7.96169e-56	4.62175																										Tet_TH0
Tbx21	3.01425e-91	2.22614e-89	60.8277	chr11	97112613	97113013	401	*	3.72901	4.25543	2.45276	1.51526	0.000413531	0.0036109	Intron (ENSMUST00000001484.2/57765, intron 1 of 5)	11	97098071	97115331	17261	2	57765	2318	ENSMUSG00000001444	Tbx21	T-box 21	71240;102465893;57765;73174;102466822;16211	0;48845;0;0;33406;0	chr11:97112613-97113013	Tet_TH0	Closed
Plk3	8.9765e-123	1.01797e-120	8.72611																										Tet_TH0
Gpr153	1.88821e-23	2.62641e-22	43.6487																										Tet_TH0
Tdrp	5.40277e-23	7.27603e-22	-9.81365	chr8	13979764	13980164	401	*	4.7959	3.32482	5.68529	-2.07164	1.92272e-09	1.2684e-07	Distal Intergenic	8	13952008	13975032	23025	2	72148	-4732	ENSMUSG00000050052	Tdrp	testis development related protein	66822;72148;546036;234086	0;0;0;0	chr8:13979764-13980164	Tet_TH0	Open
B4galt4	1.32517e-58	5.403e-57	36.278																										Tet_TH0
Alox8	8.1337e-60	3.44487e-58	20.7107																										Tet_TH0
Tet1	7.59387e-44	2.24176e-42	-6.40973	chr10	62858943	62859343	401	*	3.76568	1.45833	4.81109	-2.56913	9.3082e-09	4.62444e-07	Exon (ENSMUST00000220243.1/ENSMUST00000220243.1, exon 1 of 1)	10	62804570	62908996	104427	2	52463	49653	ENSMUSG00000047146	Tet1	tet methylcytosine dioxygenase 1	52463	0	chr10:62858943-62859343	Tet_TH0	Open
Tet1	7.59387e-44	2.24176e-42	-6.40973	chr10	62851616	62852016	401	*	3.98595	2.55791	4.86395	-1.91714	8.3223e-07	1.98255e-05	Intron (ENSMUST00000050826.13/52463, intron 2 of 10)	10	62804570	62908996	104427	2	52463	56980	ENSMUSG00000047146	Tet1	tet methylcytosine dioxygenase 1	52463	0	chr10:62851616-62852016	Tet_TH0	Open
Ifngr2	1.51831e-77	9.02848e-76	-11.5282	chr16	91553682	91554082	401	*	3.97303	2.73313	4.7958	-1.67194	1.60399e-05	0.000239033	Intron (ENSMUST00000023687.8/15980, intron 1 of 6)	16	91547072	91565623	18552	1	15980	6610	ENSMUSG00000022965	Ifngr2	interferon gamma receptor 2	15975;102465190;15980;77975	0;-26138;0;0	chr16:91553682-91554082	Tet_TH0	Open
Pik3r5	7.32747e-16	6.71377e-15	-4.82434	chr11	68447249	68447649	401	*	4.69904	3.44189	5.52727	-1.84239	1.68899e-08	7.51989e-07	Intron (ENSMUST00000021283.7/320207, intron 1 of 18)	11	68432121	68497849	65729	1	320207	15128	ENSMUSG00000020901	Pik3r5	phosphoinositide-3-kinase regulatory subunit 5	18208;320207	0;0	chr11:68447249-68447649	Tet_TH0	Open
Pik3r5	7.32747e-16	6.71377e-15	-4.82434	chr11	68453324	68453724	401	*	4.94325	4.07239	5.62514	-1.38846	3.13882e-06	6.09176e-05	Intron (ENSMUST00000021283.7/320207, intron 1 of 18)	11	68432121	68497849	65729	1	320207	21203	ENSMUSG00000020901	Pik3r5	phosphoinositide-3-kinase regulatory subunit 5	320207;104709	0;-49295	chr11:68453324-68453724	Tet_TH0	Open
Pik3r5	7.32747e-16	6.71377e-15	-4.82434	chr11	68417774	68418174	401	*	4.83877	3.90018	5.55042	-1.44337	6.5476e-06	0.000112949	Distal Intergenic	11	68432121	68497849	65729	1	320207	-13947	ENSMUSG00000020901	Pik3r5	phosphoinositide-3-kinase regulatory subunit 5	18208;320207	0;0	chr11:68417774-68418174	Tet_TH0	Open
Pik3r5	7.32747e-16	6.71377e-15	-4.82434	chr11	68431820	68432220	401	*	5.78705	5.14825	6.34972	-1.0499	0.000563738	0.00466788	Promoter (<=1kb)	11	68432121	68497849	65729	1	320207	0	ENSMUSG00000020901	Pik3r5	phosphoinositide-3-kinase regulatory subunit 5	18208;320207	0;0	chr11:68431820-68432220	Tet_TH0	Open
Pik3r5	7.32747e-16	6.71377e-15	-4.82434	chr11	68451204	68451604	401	*	5.96203	5.27357	6.55273	-1.10272	0.00064023	0.00518096	Intron (ENSMUST00000021283.7/320207, intron 1 of 18)	11	68432121	68497849	65729	1	320207	19083	ENSMUSG00000020901	Pik3r5	phosphoinositide-3-kinase regulatory subunit 5	320207	0	chr11:68451204-68451604	Tet_TH0	Open
Pik3r5	7.32747e-16	6.71377e-15	-4.82434	chr11	68432719	68433119	401	*	4.55635	3.86832	5.14682	-1.06897	0.000748022	0.00591504	Promoter (<=1kb)	11	68432121	68497849	65729	1	320207	598	ENSMUSG00000020901	Pik3r5	phosphoinositide-3-kinase regulatory subunit 5	18208;320207	0;0	chr11:68432719-68433119	Tet_TH0	Open
Adssl1	1.7936e-17	1.82107e-16	14.5433																										Tet_TH0
Daam1	5.80924e-72	3.1072e-70	-6.88928	chr12	71868694	71869094	401	*	3.95163	2.44231	4.85078	-1.9814	5.00713e-07	1.29192e-05	Intron (ENSMUST00000223272.1/208846, intron 1 of 25)	12	71831078	71992333	161256	1	208846	37616	ENSMUSG00000034574	Daam1	dishevelled associated activator of morphogenesis 1	208846	0	chr12:71868694-71869094	Tet_TH0	Open
Daam1	5.80924e-72	3.1072e-70	-6.88928	chr12	71950071	71950471	401	*	4.02992	2.93885	4.80176	-1.58355	1.33185e-05	0.000204571	Intron (ENSMUST00000223272.1/208846, intron 12 of 25)	12	71831078	71992333	161256	1	208846	118993	ENSMUSG00000034574	Daam1	dishevelled associated activator of morphogenesis 1	208846	0	chr12:71950071-71950471	Tet_TH0	Open
Daam1	5.80924e-72	3.1072e-70	-6.88928	chr12	71932982	71933382	401	*	4.46753	3.53988	5.17451	-1.40786	1.33912e-05	0.000205424	Intron (ENSMUST00000223272.1/208846, intron 3 of 25)	12	71831078	71992333	161256	1	208846	101904	ENSMUSG00000034574	Daam1	dishevelled associated activator of morphogenesis 1	208846	0	chr12:71932982-71933382	Tet_TH0	Open
Daam1	5.80924e-72	3.1072e-70	-6.88928	chr12	71949494	71949894	401	*	3.83398	2.77329	4.59453	-1.50691	0.000155054	0.00159523	Intron (ENSMUST00000223272.1/208846, intron 12 of 25)	12	71831078	71992333	161256	1	208846	118416	ENSMUSG00000034574	Daam1	dishevelled associated activator of morphogenesis 1	208846	0	chr12:71949494-71949894	Tet_TH0	Open
Dnah8	3.74224e-39	9.47105e-38	-8.48299																										Tet_TH0
Vat1l	1.14944e-39	2.9341e-38	121.325																										Tet_TH0
Pla2g7	6.59546e-19	7.33523e-18	10.787																										Tet_TH0
Pex11a	3.88827e-41	1.03719e-39	13.3789																										Tet_TH0
Amigo2	3.67408e-29	6.5393e-28	-20.9814	chr15	97355914	97356314	401	*	3.09123	3.69043	1.41778	1.52517	0.000742347	0.0058792	Intron (ENSMUST00000059433.7/239647, intron 3 of 5)	15	97244125	97247287	3163	2	105827	-108627	ENSMUSG00000048218	Amigo2	adhesion molecule with Ig like domain 2	239647	0	chr15:97355914-97356314	Tet_TH0	Closed
Amigo2	3.67408e-29	6.5393e-28	-20.9814	chr15	97252515	97252915	401	*	4.81842	2.85034	5.81304	-2.62643	7.82176e-14	2.60863e-11	Intron (ENSMUST00000059433.7/239647, intron 1 of 5)	15	97244125	97247287	3163	2	105827	-5228	ENSMUSG00000048218	Amigo2	adhesion molecule with Ig like domain 2	105827;239647	0;0	chr15:97252515-97252915	Tet_TH0	Open
Amigo2	3.67408e-29	6.5393e-28	-20.9814	chr15	97389587	97389987	401	*	4.3401	2.77593	5.25271	-2.15845	3.60624e-09	2.09844e-07	Distal Intergenic	15	97244125	97247287	3163	2	105827	-142300	ENSMUSG00000048218	Amigo2	adhesion molecule with Ig like domain 2	239647	0	chr15:97389587-97389987	Tet_TH0	Open
Amigo2	3.67408e-29	6.5393e-28	-20.9814	chr15	97429467	97429867	401	*	3.60194	2.46371	4.3907	-1.60627	2.76549e-05	0.000380046	Distal Intergenic	15	97244125	97247287	3163	2	105827	-182180	ENSMUSG00000048218	Amigo2	adhesion molecule with Ig like domain 2	239647	0	chr15:97429467-97429867	Tet_TH0	Open
Amigo2	3.67408e-29	6.5393e-28	-20.9814	chr15	97311216	97311616	401	*	3.23654	1.37899	4.21137	-2.02833	2.90974e-05	0.000395494	Intron (ENSMUST00000059433.7/239647, intron 3 of 5)	15	97244125	97247287	3163	2	105827	-63929	ENSMUSG00000048218	Amigo2	adhesion molecule with Ig like domain 2	239647	0	chr15:97311216-97311616	Tet_TH0	Open
Amigo2	3.67408e-29	6.5393e-28	-20.9814	chr15	97458615	97459015	401	*	5.25232	4.46477	5.8947	-1.26563	5.63756e-05	0.000688803	Distal Intergenic	15	97244125	97247287	3163	2	105827	-211328	ENSMUSG00000048218	Amigo2	adhesion molecule with Ig like domain 2			chr15:97458615-97459015	Tet_TH0	Open
Amigo2	3.67408e-29	6.5393e-28	-20.9814	chr15	97390757	97391157	401	*	3.87294	2.8105	4.63414	-1.48139	0.000123061	0.0013196	Distal Intergenic	15	97244125	97247287	3163	2	105827	-143470	ENSMUSG00000048218	Amigo2	adhesion molecule with Ig like domain 2	239647	0	chr15:97390757-97391157	Tet_TH0	Open
Gm17586	4.48206e-34	9.46249e-33	36.7446																										Tet_TH0
Rab39b	2.78021e-36	6.43948e-35	101.142																										Tet_TH0
Ffar1	5.10111e-40	1.31835e-38	64.9708																										Tet_TH0
Gfod1	6.06269e-88	4.29416e-86	6.49235	chr13	43262096	43262496	401	*	3.88345	4.54058	1.7678	2.28822	1.15057e-06	2.595e-05	Intron (ENSMUST00000055341.6/328232, intron 1 of 1)	13	43195245	43304172	108928	2	328232	41676	ENSMUSG00000051335	Gfod1	glucose-fructose oxidoreductase domain containing 1	328232	0	chr13:43262096-43262496	Tet_TH0	Closed
Gfod1	6.06269e-88	4.29416e-86	6.49235	chr13	43239828	43240228	401	*	3.55913	4.05531	2.41576	1.38628	0.000649065	0.00524507	Intron (ENSMUST00000055341.6/328232, intron 1 of 1)	13	43195245	43304172	108928	2	328232	63944	ENSMUSG00000051335	Gfod1	glucose-fructose oxidoreductase domain containing 1	328232	0	chr13:43239828-43240228	Tet_TH0	Closed
Mrc1	6.89598e-14	5.60949e-13	7.58628																										Tet_TH0
Srgn	3.96476e-59	1.64891e-57	5.48575																										Tet_TH0
Zfp651	9.79482e-17	9.48097e-16	4.54977																										Tet_TH0
C1qb	8.76461e-15	7.5007e-14	6.50266																										Tet_TH0
Il1r2	1.80022e-16	1.71297e-15	27.9808	chr1	40055992	40056392	401	*	3.02925	3.69081	0.872622	1.83287	0.000217337	0.00210777	Distal Intergenic	1	40074079	40125231	51153	1	16178	-17687	ENSMUSG00000026073	Il1r2	interleukin 1 receptor, type II	26921;16178;100047133	0;0;0	chr1:40055992-40056392	Tet_TH0	Closed
Scnn1b	5.82709e-16	5.36988e-15	21.8633																										Tet_TH0
Wisp1	7.73222e-44	2.27936e-42	159.185																										Tet_TH0
Trim2	3.52389e-32	6.97152e-31	4.55714																										Tet_TH0
Hey1	1.84059e-13	1.45129e-12	5.72613																										Tet_TH0
Notch3	1.62669e-19	1.87133e-18	31.8474																										Tet_TH0
Pglyrp1	3.13566e-43	9.12683e-42	6.56853																										Tet_TH0
Gm30211	3.36304e-25	5.07957e-24	49.7047																										Tet_TH0
Cd69	8.53713e-172	1.78961e-169	7.41405																										Tet_TH0
Kif11	3.20505e-18	3.42153e-17	7.43272																										Tet_TH0
Nlrx1	2.43931e-62	1.11015e-60	6.43071																										Tet_TH0
Six5	3.14383e-41	8.46225e-40	4.34386																										Tet_TH0
Gm16120	8.37625e-19	9.23657e-18	16.7826																										Tet_TH0
Scml4	5.84966e-09	3.19384e-08	-4.9284	chr10	42848812	42849212	401	*	4.19325	2.41206	5.15332	-2.30854	1.05855e-09	7.64088e-08	Distal Intergenic	10	42860370	42960780	100411	1	268297	-11158	ENSMUSG00000044770	Scml4	Scm polycomb group protein like 4	140740;268297	0;0	chr10:42848812-42849212	Tet_TH0	Open
Scml4	5.84966e-09	3.19384e-08	-4.9284	chr10	42897619	42898019	401	*	5.61958	4.64055	6.34807	-1.53897	2.49094e-07	7.17768e-06	Intron (ENSMUST00000063063.13/268297, intron 1 of 8)	10	42860370	42960780	100411	1	268297	37249	ENSMUSG00000044770	Scml4	Scm polycomb group protein like 4	268297	0	chr10:42897619-42898019	Tet_TH0	Open
Scml4	5.84966e-09	3.19384e-08	-4.9284	chr10	42838851	42839251	401	*	5.08002	3.96141	5.86183	-1.65594	6.99176e-07	1.71587e-05	Distal Intergenic	10	42860370	42960780	100411	1	268297	-21119	ENSMUSG00000044770	Scml4	Scm polycomb group protein like 4	140740;268297	0;0	chr10:42838851-42839251	Tet_TH0	Open
Scml4	5.84966e-09	3.19384e-08	-4.9284	chr10	42887012	42887412	401	*	3.94231	2.9231	4.68688	-1.49464	4.19576e-05	0.000537628	Exon (ENSMUST00000217454.1/ENSMUST00000217454.1, exon 1 of 1)	10	42860370	42960780	100411	1	268297	26642	ENSMUSG00000044770	Scml4	Scm polycomb group protein like 4	268297	0	chr10:42887012-42887412	Tet_TH0	Open
Scml4	5.84966e-09	3.19384e-08	-4.9284	chr10	42997247	42997647	401	*	4.09668	3.27735	4.75452	-1.2482	0.000649798	0.0052466	Distal Intergenic	10	42860370	42960780	100411	1	268297	136877	ENSMUSG00000044770	Scml4	Scm polycomb group protein like 4	268297;109205	0;176883	chr10:42997247-42997647	Tet_TH0	Open
Dcxr	7.59778e-66	3.68404e-64	10.4955																										Tet_TH0
1700019D03Rik	1.33353e-154	2.28717e-152	58.2001																										Tet_TH0
Actg2	9.03652e-11	5.75084e-10	12.9757																										Tet_TH0
2310015A10Rik	2.57091e-34	5.49476e-33	7.91917																										Tet_TH0
Zfyve28	8.13092e-46	2.52229e-44	5.60039																										Tet_TH0
Syk	1.73525e-17	1.76441e-16	6.10221																										Tet_TH0
Ltbp4	4.19735e-13	3.23579e-12	11.9716																										Tet_TH0
1700029M20Rik	7.13499e-29	1.25167e-27	58.3851																										Tet_TH0
Ncapg	3.61144e-17	3.59119e-16	10.5668																										Tet_TH0
Gm15675	1.30487e-31	2.53085e-30	-24.2433																										Tet_TH0
Tk1	1.53415e-22	2.01635e-21	16.5832																										Tet_TH0
Calcrl	7.18737e-82	4.58952e-80	-5.89051	chr2	84347385	84347785	401	*	4.58801	2.3424	5.62516	-2.76773	1.4796e-12	2.90607e-10	Intron (ENSMUST00000074262.8/54598, intron 11 of 15)	2	84330626	84425411	94786	2	54598	77626	ENSMUSG00000059588	Calcrl	calcitonin receptor-like	54598	0	chr2:84347385-84347785	Tet_TH0	Open
Calcrl	7.18737e-82	4.58952e-80	-5.89051	chr2	84425122	84425522	401	*	5.15493	4.16614	5.88739	-1.53366	6.30981e-07	1.57174e-05	Promoter (<=1kb)	2	84330626	84425411	94786	2	54598	0	ENSMUSG00000059588	Calcrl	calcitonin receptor-like	54598;21788	0;0	chr2:84425122-84425522	Tet_TH0	Open
Fam84a	2.48823e-24	3.59848e-23	41.1587																										Tet_TH0
Trp53inp2	1.61914e-31	3.13743e-30	7.38702																										Tet_TH0
Klrd1	6.41101e-42	1.77161e-40	-39.7529																										Tet_TH0
Gm33994	7.80141e-35	1.70066e-33	-27.431																										Tet_TH0
Acss2	6.10298e-41	1.61756e-39	-6.10001																										Tet_TH0
Pxylp1	3.47329e-39	8.80113e-38	-7.80423	chr9	96953486	96953886	401	*	4.53574	3.06793	5.42427	-2.05582	5.81712e-09	3.12727e-07	Intron (ENSMUST00000055433.4/211949, intron 2 of 2)	9	96823336	96892669	69334	2	235534	-60817	ENSMUSG00000043587	Pxylp1	2-phosphoxylose phosphatase 1	211949	0	chr9:96953486-96953886	Tet_TH0	Open
Pxylp1	3.47329e-39	8.80113e-38	-7.80423	chr9	96889628	96890028	401	*	5.80362	4.89598	6.50192	-1.4846	1.34221e-07	4.27834e-06	Intron (ENSMUST00000154146.7/235534, intron 1 of 3)	9	96823336	96892669	69334	2	235534	2641	ENSMUSG00000043587	Pxylp1	2-phosphoxylose phosphatase 1	235534	0	chr9:96889628-96890028	Tet_TH0	Open
Pxylp1	3.47329e-39	8.80113e-38	-7.80423	chr9	96935937	96936337	401	*	5.78989	5.19826	6.32449	-0.968106	0.00116156	0.00850195	Distal Intergenic	9	96823336	96892669	69334	2	235534	-43268	ENSMUSG00000043587	Pxylp1	2-phosphoxylose phosphatase 1	235534;211949	0;0	chr9:96935937-96936337	Tet_TH0	Open
Ifngr1	3.03619e-40	7.896e-39	-4.23854	chr10	19582204	19582604	401	*	4.5667	3.44527	5.34951	-1.61525	4.11197e-06	7.63448e-05	Distal Intergenic	10	19591949	19610229	18281	1	15979	-9345	ENSMUSG00000020009	Ifngr1	interferon gamma receptor 1	15979;237310	0;-39394	chr10:19582204-19582604	Tet_TH0	Open
Ifngr1	3.03619e-40	7.896e-39	-4.23854	chr10	19598026	19598426	401	*	4.54777	3.85675	5.13988	-1.09366	0.000486722	0.00413278	Intron (ENSMUST00000020188.12/15979, intron 2 of 6)	10	19591949	19610229	18281	1	15979	6077	ENSMUSG00000020009	Ifngr1	interferon gamma receptor 1	15979;237310	0;-23572	chr10:19598026-19598426	Tet_TH0	Open
Slc16a5	5.01609e-136	6.75968e-134	-36.4574	chr11	115463514	115463914	401	*	4.50587	3.4671	5.25805	-1.61081	7.8275e-07	1.88588e-05	Promoter (1-2kb)	11	115462474	115474398	11925	1	217316	1040	ENSMUSG00000045775	Slc16a5	solute carrier family 16 (monocarboxylic acid transporters), member 5	71679;70382;432613;100628623;217316;276905;50773;102634812;15374	0;0;22969;-15454;0;0;0;-29110;0	chr11:115463514-115463914	Tet_TH0	Open
Slc16a5	5.01609e-136	6.75968e-134	-36.4574	chr11	115462590	115462990	401	*	4.05084	3.26538	4.69218	-1.28371	0.000347083	0.00312227	Promoter (<=1kb)	11	115462474	115474398	11925	1	217316	116	ENSMUSG00000045775	Slc16a5	solute carrier family 16 (monocarboxylic acid transporters), member 5	68572;71679;70382;432613;100628623;217316;276905;50773;102634812;15374	0;0;0;22045;-14530;0;0;0;-30034;0	chr11:115462590-115462990	Tet_TH0	Open
Sirpa	6.46859e-12	4.54597e-11	4.16381																										Tet_TH0
Clcf1	1.1071e-60	4.80662e-59	-4.48221																										Tet_TH0
Kctd17	1.31667e-39	3.35274e-38	5.30882																										Tet_TH0
Odc1	1.54885e-44	4.66521e-43	4.30304	chr12	17510979	17511379	401	*	4.53904	3.08475	5.42403	-1.58647	0.00106098	0.00790229	Distal Intergenic	12	17544794	17551505	6712	1	18263	-33415	ENSMUSG00000011179	Odc1	ornithine decarboxylase, structural 1	18263	0	chr12:17510979-17511379	Tet_TH0	Open
Stard10	1.15218e-74	6.48001e-73	5.31087																										Tet_TH0
5730409E04Rik	5.69111e-46	1.78141e-44	22.7605	chr4	126609687	126610087	401	*	4.07375	4.52277	3.11131	1.28995	0.000437306	0.00377911	Promoter (<=1kb)	4	126609818	126614371	4554	1	230757	0	ENSMUSG00000073755	5730409E04Rik	RIKEN cDNA 5730409E04Rik gene	269582;102465673;230757	0;49827;0	chr4:126609687-126610087	Tet_TH0	Closed
Ly96	6.19517e-34	1.30262e-32	12.6341	chr1	16688503	16688903	401	*	5.21166	4.48519	5.82283	-1.17353	0.000106602	0.00117566	Promoter (<=1kb)	1	16688051	16709611	21561	1	17087	452	ENSMUSG00000025779	Ly96	lymphocyte antigen 96	67923;329101;70397;17087	0;30951;0;0	chr1:16688503-16688903	Tet_TH0	Open
Ube2l6	2.25677e-57	8.90394e-56	22.3025																										Tet_TH0
Cldn12	3.99948e-22	5.16177e-21	4.80639																										Tet_TH0
D430019H16Rik	8.40683e-17	8.18709e-16	24.0782																										Tet_TH0
Xkrx	2.24133e-27	3.71223e-26	-7.06743																										Tet_TH0
Itgb3	3.84017e-26	6.06046e-25	-22.3789																										Tet_TH0
St6galnac2	1.19024e-30	2.23742e-29	-6.86045	chr11	116687914	116688314	401	*	5.87793	5.04095	6.54416	-1.32856	3.59022e-05	0.000471441	Intron (ENSMUST00000079545.5/20446, intron 2 of 8)	11	116675303	116694868	19566	2	20446	6554	ENSMUSG00000057286	St6galnac2	ST6 (alpha-N-acetyl-neuraminyl-2,3-beta-galactosyl-1,3)-N-acetylgalactosaminide alpha-2,6-sialyltransferase 2	114886;100038570;66293;100216536;100216531;100216538;20446	-33601;0;0;15408;13766;13316;0	chr11:116687914-116688314	Tet_TH0	Open
AC154627.2	9.48793e-36	2.1543e-34	10.9788																										Tet_TH0
Lrrn3	3.37343e-23	4.61496e-22	46.0349	chr12	41961001	41961401	401	*	4.41564	2.76041	5.34923	-2.21139	4.66383e-10	3.82657e-08	Intron (ENSMUST00000222917.1/ENSMUST00000222917.1, intron 2 of 6)	12	41451668	41486431	34764	2	16981	-474570	ENSMUSG00000036295	Lrrn3	leucine rich repeat protein 3, neuronal	93757	0	chr12:41961001-41961401	Tet_TH0	Open
Lrrn3	3.37343e-23	4.61496e-22	46.0349	chr12	41852037	41852437	401	*	4.52338	3.59953	5.22872	-1.40285	2.14233e-05	0.000305361	Intron (ENSMUST00000132121.7/93757, intron 6 of 6)	12	41451668	41486431	34764	2	16981	-365606	ENSMUSG00000036295	Lrrn3	leucine rich repeat protein 3, neuronal	93757	0	chr12:41852037-41852437	Tet_TH0	Open
Lrrn3	3.37343e-23	4.61496e-22	46.0349	chr12	41727786	41728186	401	*	4.11559	3.29196	4.7755	-1.25775	0.000299758	0.00275996	Intron (ENSMUST00000132121.7/93757, intron 6 of 6)	12	41451668	41486431	34764	2	16981	-241355	ENSMUSG00000036295	Lrrn3	leucine rich repeat protein 3, neuronal	93757	0	chr12:41727786-41728186	Tet_TH0	Open
Gm11454	1.83729e-25	2.80363e-24	32.8303																										Tet_TH0
Il7r	9.24819e-11	5.88013e-10	-6.30644	chr15	9574795	9575195	401	*	5.48039	4.47204	6.22069	-1.56479	3.41673e-07	9.33034e-06	Distal Intergenic	15	9505788	9530176	24389	2	16197	-44619	ENSMUSG00000003882	Il7r	interleukin 7 receptor	16197;320277	0;0	chr15:9574795-9575195	Tet_TH0	Open
Il7r	9.24819e-11	5.88013e-10	-6.30644	chr15	9580917	9581317	401	*	4.05093	2.90263	4.8432	-1.63313	1.16144e-05	0.000182442	Intron (ENSMUST00000160236.7/320277, intron 34 of 34)	15	9505788	9530176	24389	2	16197	-50741	ENSMUSG00000003882	Il7r	interleukin 7 receptor	320277	0	chr15:9580917-9581317	Tet_TH0	Open
Il7r	9.24819e-11	5.88013e-10	-6.30644	chr15	9600069	9600469	401	*	3.33428	1.81606	4.23565	-1.8663	2.28292e-05	0.000322844	Exon (ENSMUST00000208854.1/320277, exon 31 of 33)	15	9505788	9530176	24389	2	16197	-69893	ENSMUSG00000003882	Il7r	interleukin 7 receptor	320277	0	chr15:9600069-9600469	Tet_TH0	Open
Il7r	9.24819e-11	5.88013e-10	-6.30644	chr15	9533327	9533727	401	*	5.09149	4.38373	5.69268	-1.10979	0.00076319	0.00600204	Distal Intergenic	15	9505788	9530176	24389	2	16197	-3151	ENSMUSG00000003882	Il7r	interleukin 7 receptor	16197;320277	0;0	chr15:9533327-9533727	Tet_TH0	Open
Tjp3	3.19428e-43	9.28443e-42	4.15823																										Tet_TH0
Znrf3	6.20715e-50	2.1187e-48	-5.96589	chr11	5411611	5412011	401	*	5.37332	3.8878	6.26643	-2.10823	1.31315e-10	1.3399e-08	Intron (ENSMUST00000109867.7/407821, intron 1 of 8)	11	5276324	5444847	168524	2	407821	32836	ENSMUSG00000041961	Znrf3	zinc and ring finger 3	407821	0	chr11:5411611-5412011	Tet_TH0	Open
Znrf3	6.20715e-50	2.1187e-48	-5.96589	chr11	5416012	5416412	401	*	4.22597	2.50918	5.17285	-2.21298	1.16965e-08	5.62326e-07	Intron (ENSMUST00000109867.7/407821, intron 1 of 8)	11	5276324	5444847	168524	2	407821	28435	ENSMUSG00000041961	Znrf3	zinc and ring finger 3	407821	0	chr11:5416012-5416412	Tet_TH0	Open
Znrf3	6.20715e-50	2.1187e-48	-5.96589	chr11	5435551	5435951	401	*	4.00733	2.13439	4.98502	-2.32209	3.01678e-08	1.22505e-06	Intron (ENSMUST00000109867.7/407821, intron 1 of 8)	11	5276324	5444847	168524	2	407821	8896	ENSMUSG00000041961	Znrf3	zinc and ring finger 3	407821	0	chr11:5435551-5435951	Tet_TH0	Open
Znrf3	6.20715e-50	2.1187e-48	-5.96589	chr11	5369158	5369558	401	*	3.69806	2.19948	4.5945	-1.97794	1.61932e-06	3.46561e-05	Intron (ENSMUST00000109867.7/407821, intron 1 of 8)	11	5276324	5444847	168524	2	407821	75289	ENSMUSG00000041961	Znrf3	zinc and ring finger 3	407821	0	chr11:5369158-5369558	Tet_TH0	Open
Scd1	1.38137e-16	1.32353e-15	4.11206																										Tet_TH0
Fbxo17	4.24223e-34	8.9744e-33	-5.66216																										Tet_TH0
Qser1	6.8754e-20	8.03408e-19	-7.06778	chr2	104817511	104817911	401	*	3.04373	3.66387	1.22753	1.56334	0.000942376	0.00715956	Promoter (<=1kb)	2	104754795	104816760	61966	2	99003	-751	ENSMUSG00000074994	Qser1	glutamine and serine rich 1	99003;228413;211936	-751;0;0	chr2:104817511-104817911	Tet_TH0	Closed
Nme4	1.01557e-51	3.59662e-50	-17.956																										Tet_TH0
Tead1	3.02471e-29	5.41136e-28	67.5392																										Tet_TH0
Spag5	4.93025e-13	3.77695e-12	5.74937																										Tet_TH0
Raver2	8.17461e-56	3.1128e-54	-17.468																										Tet_TH0
Nxpe1-ps	1.13792e-17	1.17198e-16	16.6067																										Tet_TH0
Kcnk6	1.10479e-32	2.23466e-31	7.11435																										Tet_TH0
Lrrc75b	3.09694e-19	3.51206e-18	-25.523																										Tet_TH0
Nynrin	9.6309e-95	7.71699e-93	13.0891																										Tet_TH0
Ifitm2	1.87365e-21	2.3566e-20	13.5531																										Tet_TH0
Zfp52	6.57394e-39	1.64769e-37	4.6752																										Tet_TH0
Cd55	1.02502e-14	8.72524e-14	-6.76037	chr1	130508605	130509005	401	*	3.71854	2.44781	4.55101	-1.65739	4.18823e-05	0.000536854	Intron (ENSMUST00000125681.1/ENSMUST00000125681.1, intron 1 of 4)	1	130439027	130462744	23718	2	13136	-45861	ENSMUSG00000026399	Cd55	CD55 molecule, decay accelerating factor for complement	13136	0	chr1:130508605-130509005	Tet_TH0	Open
Cd55	1.02502e-14	8.72524e-14	-6.76037	chr1	130474941	130475341	401	*	4.49928	3.44584	5.25708	-1.50574	4.51085e-05	0.000571295	Exon (ENSMUST00000193111.1/ENSMUST00000193111.1, exon 1 of 1)	1	130439027	130462744	23718	2	13136	-12197	ENSMUSG00000026399	Cd55	CD55 molecule, decay accelerating factor for complement	102640368;13136	52117;0	chr1:130474941-130475341	Tet_TH0	Open
Prc1	8.69113e-13	6.5374e-12	4.33443																										Tet_TH0
St8sia6	1.2861e-07	6.14137e-07	-4.95712	chr2	13760366	13760766	401	*	5.31553	4.2666	6.07162	-1.59271	1.10484e-06	2.50599e-05	Intron (ENSMUST00000003509.9/241230, intron 2 of 7)	2	13651021	13794064	143044	2	241230	33298	ENSMUSG00000003418	St8sia6	ST8 alpha-N-acetyl-neuraminide alpha-2,8-sialyltransferase 6	241230	0	chr2:13760366-13760766	Tet_TH0	Open
St8sia6	1.2861e-07	6.14137e-07	-4.95712	chr2	13757448	13757848	401	*	5.86367	4.91184	6.5809	-1.48467	3.41457e-06	6.54199e-05	Intron (ENSMUST00000003509.9/241230, intron 2 of 7)	2	13651021	13794064	143044	2	241230	36216	ENSMUSG00000003418	St8sia6	ST8 alpha-N-acetyl-neuraminide alpha-2,8-sialyltransferase 6	241230	0	chr2:13757448-13757848	Tet_TH0	Open
St8sia6	1.2861e-07	6.14137e-07	-4.95712	chr2	13718769	13719169	401	*	6.07228	4.95794	6.85256	-1.64247	4.3622e-06	8.03693e-05	Intron (ENSMUST00000003509.9/241230, intron 3 of 7)	2	13651021	13794064	143044	2	241230	74895	ENSMUSG00000003418	St8sia6	ST8 alpha-N-acetyl-neuraminide alpha-2,8-sialyltransferase 6	241230	0	chr2:13718769-13719169	Tet_TH0	Open
Plcxd1	3.9294e-26	6.19657e-25	8.01525	chr5	110057892	110058292	401	*	5.40564	4.7923	5.95334	-1.00785	0.000668757	0.00537595	Intron (ENSMUST00000210275.1/ENSMUST00000210275.1, intron 1 of 3)	5	110099969	110105953	5985	1	403178	-41677	ENSMUSG00000064247	Plcxd1	phosphatidylinositol-specific phospholipase C, X domain containing 1	69504;403178;107999	0;0;0	chr5:110057892-110058292	Tet_TH0	Open
Stk32c	1.23569e-41	3.37869e-40	142.135																										Tet_TH0
Kcnk5	1.54146e-114	1.63214e-112	68.9521	chr14	20181629	20182029	401	*	4.76185	5.1965	3.84923	1.30005	0.000135622	0.00143211	Promoter (<=1kb)	14	20140057	20181809	41753	2	16529	0	ENSMUSG00000023243	Kcnk5	potassium channel, subfamily K, member 5	67509;16529	0;0	chr14:20181629-20182029	Tet_TH0	Closed
Kcnk5	1.54146e-114	1.63214e-112	68.9521	chr14	20173838	20174238	401	*	3.88147	4.50731	2.02344	1.66519	0.000901881	0.0069102	Intron (ENSMUST00000024011.9/16529, intron 1 of 4)	14	20140057	20181809	41753	2	16529	7571	ENSMUSG00000023243	Kcnk5	potassium channel, subfamily K, member 5	67509;16529	0;0	chr14:20173838-20174238	Tet_TH0	Closed
Kif20a	4.94978e-17	4.88923e-16	4.59531																										Tet_TH0
Arfgef3	8.64329e-08	4.20375e-07	5.50748																										Tet_TH0
Pcyt1b	1.34104e-20	1.6115e-19	19.5775																										Tet_TH0
Lima1	5.21679e-15	4.53938e-14	9.30037																										Tet_TH0
Mtmr7	4.62076e-12	3.27621e-11	9.22086																										Tet_TH0
Fam241b	2.45773e-29	4.42371e-28	34.6911																										Tet_TH0
Ebi3	2.9232e-47	9.46413e-46	79.903																										Tet_TH0
Smco3	7.48416e-21	9.14178e-20	26.4712																										Tet_TH0
Metrnl	4.55134e-30	8.38101e-29	72.8255	chr11	121697296	121697696	401	*	4.04561	3.18464	4.72299	-1.27821	0.000499221	0.00422	Distal Intergenic	11	121701544	121716306	14763	1	210029	-3848	ENSMUSG00000039208	Metrnl	meteorin, glial cell differentiation regulator-like	210004;210029	0;0	chr11:121697296-121697696	Tet_TH0	Open
Pvrig	1.54007e-35	3.46274e-34	80.8663																										Tet_TH0
Tec	3.03632e-46	9.57639e-45	-5.31228	chr5	72812887	72813287	401	*	3.63694	2.68015	4.35625	-1.41792	0.000192911	0.0019126	Intron (ENSMUST00000071944.12/21682, intron 3 of 18)	5	72755716	72868483	112768	2	21682	55196	ENSMUSG00000029217	Tec	tec protein tyrosine kinase	21682	0	chr5:72812887-72813287	Tet_TH0	Open
Tec	3.03632e-46	9.57639e-45	-5.31228	chr5	72817634	72818034	401	*	4.26862	3.49305	4.90503	-1.15823	0.000622393	0.00507308	Intron (ENSMUST00000071944.12/21682, intron 3 of 18)	5	72755716	72868483	112768	2	21682	50449	ENSMUSG00000029217	Tec	tec protein tyrosine kinase	21682	0	chr5:72817634-72818034	Tet_TH0	Open
Gas2l1	3.302e-38	8.12888e-37	24.2337																										Tet_TH0
Cnn3	2.31561e-19	2.64479e-18	-7.72255																										Tet_TH0
Rin2	5.12924e-23	6.94372e-22	35.5837	chr2	145832359	145832759	401	*	5.71423	4.87621	6.38095	-1.32651	4.18788e-05	0.000536854	Intron (ENSMUST00000110005.7/74030, intron 3 of 11)	2	145784734	145887616	102883	1	74030	47625	ENSMUSG00000001768	Rin2	Ras and Rab interactor 2	408057;74030	157144;0	chr2:145832359-145832759	Tet_TH0	Open
A930005H10Rik	1.07567e-37	2.58074e-36	-4.57485	chr3	115933569	115933969	401	*	5.27234	3.78075	6.16699	-2.12299	1.27084e-11	1.85321e-09	3' UTR	3	115881581	115888130	6550	2	68161	-45439	ENSMUSG00000054426	A930005H10Rik	RIKEN cDNA A930005H10 gene	68161;69740;66500;100316705	0;0;0;-45933	chr3:115933569-115933969	Tet_TH0	Open
Bub1b	1.21544e-14	1.02913e-13	9.25776																										Tet_TH0
Tlr4	7.47955e-27	1.21268e-25	59.115																										Tet_TH0
Smim10l2a	5.32597e-47	1.71897e-45	29.9395																										Tet_TH0
Gm44250	4.9534e-25	7.42223e-24	5.88828																										Tet_TH0
Naip5	1.11507e-18	1.21859e-17	8.84793																										Tet_TH0
Itgb5	6.09692e-26	9.54938e-25	21.026																										Tet_TH0
Ryr3	2.29104e-31	4.42287e-30	8.65777																										Tet_TH0
Ccdc80	7.10655e-15	6.12213e-14	16.942	chr16	45021448	45021848	401	*	4.57696	2.86766	5.52226	-2.32084	3.44537e-11	4.36968e-09	Distal Intergenic	16	45093454	45128077	34624	1	67896	-71606	ENSMUSG00000022665	Ccdc80	coiled-coil domain containing 80	74603	0	chr16:45021448-45021848	Tet_TH0	Open
Ccdc80	7.10655e-15	6.12213e-14	16.942	chr16	45018851	45019251	401	*	4.09739	2.2017	5.07925	-2.43885	2.89923e-10	2.53346e-08	Distal Intergenic	16	45093454	45128077	34624	1	67896	-74203	ENSMUSG00000022665	Ccdc80	coiled-coil domain containing 80	74603	0	chr16:45018851-45019251	Tet_TH0	Open
Ccdc80	7.10655e-15	6.12213e-14	16.942	chr16	45025329	45025729	401	*	4.73281	3.49887	5.55367	-1.78981	1.31061e-07	4.20463e-06	Distal Intergenic	16	45093454	45128077	34624	1	67896	-67725	ENSMUSG00000022665	Ccdc80	coiled-coil domain containing 80	74603	0	chr16:45025329-45025729	Tet_TH0	Open
Tnfrsf21	1.03024e-08	5.49346e-08	5.3532																										Tet_TH0
Maged1	2.70687e-42	7.58106e-41	4.93917																										Tet_TH0
Trf	3.62284e-15	3.17906e-14	8.51599																										Tet_TH0
Ago4	9.49822e-37	2.22479e-35	29.2909																										Tet_TH0
Zfp612	1.42449e-25	2.18818e-24	4.17886																										Tet_TH0
Nusap1	4.50021e-11	2.93596e-10	8.97322																										Tet_TH0
Maged2	1.78593e-34	3.83282e-33	4.97622																										Tet_TH0
Cnrip1	2.01008e-58	8.16345e-57	19.7921	chr11	17051614	17052014	401	*	3.89449	4.34331	2.93276	1.17428	0.00138232	0.00981083	Promoter (<=1kb)	11	17051586	17079371	27786	1	380686	28	ENSMUSG00000044629	Cnrip1	cannabinoid receptor interacting protein 1	56193;380686	0;0	chr11:17051614-17052014	Tet_TH0	Closed
Scn11a	3.44395e-23	4.70832e-22	36.4948																										Tet_TH0
Rasl11a	1.45931e-32	2.94602e-31	39.8137																										Tet_TH0
Atp6v0e2	4.35742e-65	2.08363e-63	4.15849																										Tet_TH0
Treml2	3.51193e-41	9.40427e-40	-30.6719	chr17	48293454	48293854	401	*	3.6428	1.58741	4.65183	-2.39175	8.30723e-08	2.85514e-06	Distal Intergenic	17	48299498	48312533	13036	1	328833	-5644	ENSMUSG00000071068	Treml2	triggering receptor expressed on myeloid cells-like 2	58217;58218;224840;328833;320148	60686;45677;29159;0;0	chr17:48293454-48293854	Tet_TH0	Open
Treml2	3.51193e-41	9.40427e-40	-30.6719	chr17	48300831	48301231	401	*	4.295	3.30795	5.02676	-1.44034	3.68506e-05	0.000482487	Promoter (1-2kb)	17	48299498	48312533	13036	1	328833	1333	ENSMUSG00000071068	Treml2	triggering receptor expressed on myeloid cells-like 2	58218;224840;328833;320148;83433	53054;36536;0;0;-45170	chr17:48300831-48301231	Tet_TH0	Open
P4ha2	6.57996e-32	1.29068e-30	-40.5237	chr11	54151108	54151508	401	*	4.90114	2.65851	5.93788	-2.8569	6.46169e-16	5.17208e-13	Distal Intergenic	11	54100095	54131665	31571	1	18452	51013	ENSMUSG00000018906	P4ha2	procollagen-proline, 2-oxoglutarate 4-dioxygenase (proline 4-hydroxylase), alpha II polypeptide	18452;71056	0;0	chr11:54151108-54151508	Tet_TH0	Open
P4ha2	6.57996e-32	1.29068e-30	-40.5237	chr11	54112853	54113253	401	*	4.51961	2.6922	5.48873	-2.38304	3.27342e-10	2.8006e-08	Exon (ENSMUST00000155299.1/18452, exon 1 of 2)	11	54100095	54131665	31571	1	18452	12758	ENSMUSG00000018906	P4ha2	procollagen-proline, 2-oxoglutarate 4-dioxygenase (proline 4-hydroxylase), alpha II polypeptide	30794;18452	0;0	chr11:54112853-54113253	Tet_TH0	Open
P4ha2	6.57996e-32	1.29068e-30	-40.5237	chr11	54105018	54105418	401	*	3.76587	1.90049	4.74216	-2.34107	2.64818e-08	1.10144e-06	Intron (ENSMUST00000151218.7/18452, intron 2 of 5)	11	54100095	54131665	31571	1	18452	4923	ENSMUSG00000018906	P4ha2	procollagen-proline, 2-oxoglutarate 4-dioxygenase (proline 4-hydroxylase), alpha II polypeptide	30794;18452	0;0	chr11:54105018-54105418	Tet_TH0	Open
P4ha2	6.57996e-32	1.29068e-30	-40.5237	chr11	54155906	54156306	401	*	4.3755	3.195	5.17878	-1.77045	6.80044e-08	2.4228e-06	Distal Intergenic	11	54100095	54131665	31571	1	18452	55811	ENSMUSG00000018906	P4ha2	procollagen-proline, 2-oxoglutarate 4-dioxygenase (proline 4-hydroxylase), alpha II polypeptide	18452;71056	0;0	chr11:54155906-54156306	Tet_TH0	Open
2810001G20Rik	3.23865e-35	7.1578e-34	-4.18835	chr11	64116677	64117077	401	*	3.9862	2.42034	4.89921	-2.14278	2.05166e-08	8.83955e-07	Distal Intergenic	11	64079484	64083259	3776	1	66456	37193	ENSMUSG00000087497	2810001G20Rik	RIKEN cDNA 2810001G20 gene	70383;66456	0;0	chr11:64116677-64117077	Tet_TH0	Open
2810001G20Rik	3.23865e-35	7.1578e-34	-4.18835	chr11	64187019	64187419	401	*	4.13288	2.86188	4.96543	-1.82829	3.52827e-07	9.57684e-06	Distal Intergenic	11	64079484	64083259	3776	1	66456	107535	ENSMUSG00000087497	2810001G20Rik	RIKEN cDNA 2810001G20 gene			chr11:64187019-64187419	Tet_TH0	Open
2810001G20Rik	3.23865e-35	7.1578e-34	-4.18835	chr11	64115114	64115514	401	*	3.74757	2.0573	4.68881	-2.09411	6.38997e-07	1.58841e-05	Distal Intergenic	11	64079484	64083259	3776	1	66456	35630	ENSMUSG00000087497	2810001G20Rik	RIKEN cDNA 2810001G20 gene	70383;66456	0;0	chr11:64115114-64115514	Tet_TH0	Open
2810001G20Rik	3.23865e-35	7.1578e-34	-4.18835	chr11	64113381	64113781	401	*	3.56759	2.23868	4.41766	-1.73454	5.45505e-05	0.000672204	Distal Intergenic	11	64079484	64083259	3776	1	66456	33897	ENSMUSG00000087497	2810001G20Rik	RIKEN cDNA 2810001G20 gene	70383;66456	0;0	chr11:64113381-64113781	Tet_TH0	Open
2810001G20Rik	3.23865e-35	7.1578e-34	-4.18835	chr11	64085898	64086298	401	*	3.74961	2.7756	4.47604	-1.47724	7.05585e-05	0.000834082	Distal Intergenic	11	64079484	64083259	3776	1	66456	6414	ENSMUSG00000087497	2810001G20Rik	RIKEN cDNA 2810001G20 gene	70383;66456	0;0	chr11:64085898-64086298	Tet_TH0	Open
Slc6a8	1.53903e-28	2.65278e-27	19.7533																										Tet_TH0
Nr3c2	6.15197e-38	1.48629e-36	33.4637																										Tet_TH0
Cpq	8.78009e-53	3.16893e-51	14.0379																										Tet_TH0
Cd177	1.81502e-12	1.32771e-11	-11.8925																										Tet_TH0
Clspn	2.49385e-13	1.94934e-12	5.29961																										Tet_TH0
Ifi213	6.57941e-57	2.56177e-55	-6.55129																										Tet_TH0
Satb1	6.95104e-46	2.16925e-44	-20.9209	chr17	51800209	51800609	401	*	4.05332	0.864857	5.18233	-3.23145	9.7001e-12	1.44974e-09	Intron (ENSMUST00000144331.7/20230, intron 5 of 10)	17	51736187	51833290	97104	2	20230	32681	ENSMUSG00000023927	Satb1	special AT-rich sequence binding protein 1	20230	0	chr17:51800209-51800609	Tet_TH0	Open
Satb1	6.95104e-46	2.16925e-44	-20.9209	chr17	51789118	51789518	401	*	4.48823	2.7667	5.4361	-2.30689	3.58585e-10	3.0248e-08	Intron (ENSMUST00000144331.7/20230, intron 5 of 10)	17	51736187	51833290	97104	2	20230	43772	ENSMUSG00000023927	Satb1	special AT-rich sequence binding protein 1	20230	0	chr17:51789118-51789518	Tet_TH0	Open
Satb1	6.95104e-46	2.16925e-44	-20.9209	chr17	51826457	51826857	401	*	4.54714	3.02047	5.45061	-2.11765	5.32448e-10	4.29044e-08	5' UTR	17	51736187	51833290	97104	2	20230	6433	ENSMUSG00000023927	Satb1	special AT-rich sequence binding protein 1	20230	0	chr17:51826457-51826857	Tet_TH0	Open
Satb1	6.95104e-46	2.16925e-44	-20.9209	chr17	51735595	51735995	401	*	3.77925	1.48745	4.82262	-2.72561	6.81429e-10	5.27836e-08	Distal Intergenic	17	51736187	51833290	97104	2	20230	97295	ENSMUSG00000023927	Satb1	special AT-rich sequence binding protein 1	20230	0	chr17:51735595-51735995	Tet_TH0	Open
Satb1	6.95104e-46	2.16925e-44	-20.9209	chr17	51814313	51814713	401	*	4.35834	2.83288	5.26151	-2.1296	7.38364e-10	5.61079e-08	5' UTR	17	51736187	51833290	97104	2	20230	18577	ENSMUSG00000023927	Satb1	special AT-rich sequence binding protein 1	20230	0	chr17:51814313-51814713	Tet_TH0	Open
Satb1	6.95104e-46	2.16925e-44	-20.9209	chr17	51857645	51858045	401	*	3.49237	0.866096	4.57466	-2.70722	2.23025e-08	9.47613e-07	Distal Intergenic	17	51736187	51833290	97104	2	20230	-24355	ENSMUSG00000023927	Satb1	special AT-rich sequence binding protein 1	20230;100504169	0;0	chr17:51857645-51858045	Tet_TH0	Open
Satb1	6.95104e-46	2.16925e-44	-20.9209	chr17	51762485	51762885	401	*	4.30225	2.92062	5.16747	-1.9368	8.2616e-08	2.8476e-06	Intron (ENSMUST00000144331.7/20230, intron 9 of 10)	17	51736187	51833290	97104	2	20230	70405	ENSMUSG00000023927	Satb1	special AT-rich sequence binding protein 1	20230	0	chr17:51762485-51762885	Tet_TH0	Open
Satb1	6.95104e-46	2.16925e-44	-20.9209	chr17	51805342	51805742	401	*	3.78501	2.23142	4.69506	-1.99719	1.22442e-06	2.7461e-05	Exon (ENSMUST00000144331.7/20230, exon 3 of 11)	17	51736187	51833290	97104	2	20230	27548	ENSMUSG00000023927	Satb1	special AT-rich sequence binding protein 1	20230	0	chr17:51805342-51805742	Tet_TH0	Open
Plxdc1	1.0571e-14	8.98731e-14	9.5769																										Tet_TH0
Pik3ip1	9.51776e-23	1.26617e-21	-11.6139	chr11	3344956	3345356	401	*	5.21117	3.17202	6.21759	-2.69011	1.79965e-15	1.22305e-12	3' UTR	11	3330401	3342971	12571	1	216505	14555	ENSMUSG00000034614	Pik3ip1	phosphoinositide-3-kinase interacting protein 1	56218;100302648;216505;16886	0;0;0;0	chr11:3344956-3345356	Tet_TH0	Open
Pik3ip1	9.51776e-23	1.26617e-21	-11.6139	chr11	3328373	3328773	401	*	4.60242	2.29379	5.648	-2.8163	4.48065e-13	1.11302e-10	Promoter (1-2kb)	11	3330401	3342971	12571	1	216505	-1628	ENSMUSG00000034614	Pik3ip1	phosphoinositide-3-kinase interacting protein 1	56218;100302648;216505;16886	0;0;0;0	chr11:3328373-3328773	Tet_TH0	Open
Pik3ip1	9.51776e-23	1.26617e-21	-11.6139	chr11	3335801	3336201	401	*	5.56342	4.60791	6.2822	-1.45926	2.52682e-05	0.000351415	Exon (ENSMUST00000138907.7/216505, exon 4 of 5)	11	3330401	3342971	12571	1	216505	5400	ENSMUSG00000034614	Pik3ip1	phosphoinositide-3-kinase interacting protein 1	56218;100302648;216505;16886	0;0;0;0	chr11:3335801-3336201	Tet_TH0	Open
Kif18b	1.40846e-12	1.04132e-11	9.55313																										Tet_TH0
Itgad	6.97983e-11	4.49573e-10	5.17597																										Tet_TH0
Tmbim1	2.1248e-30	3.95125e-29	6.74032																										Tet_TH0
Fcna	9.56142e-13	7.17643e-12	7.77395																										Tet_TH0
Tmie	1.41472e-63	6.56814e-62	-11.5234	chr9	110896643	110897043	401	*	3.6391	2.76335	4.3232	-1.25317	0.00135004	0.00963296	Exon (ENSMUST00000084926.8/235633, exon 23 of 27)	9	110865711	110880113	14403	2	20776	-16530	ENSMUSG00000049555	Tmie	transmembrane inner ear	74306;235631;20776;235633;235634;21667	52137;38676;0;0;0;49115	chr9:110896643-110897043	Tet_TH0	Open
Slc46a1	9.81922e-16	8.91809e-15	4.99258																										Tet_TH0
Dtl	2.38386e-24	3.45718e-23	6.43526																										Tet_TH0
Nrn1	7.2998e-74	3.99717e-72	63.8761	chr13	36578470	36578870	401	*	3.1266	3.69927	1.61331	1.49943	0.000854263	0.00660294	Intron (ENSMUST00000224916.1/69955, intron 6 of 7)	13	36725361	36735131	9771	2	68404	156261	ENSMUSG00000039114	Nrn1	neuritin 1	69955	0	chr13:36578470-36578870	Tet_TH0	Closed
Lag3	6.99891e-63	3.21346e-61	303.11	chr6	124900933	124901333	401	*	4.37823	4.80514	3.49158	1.08917	0.000945789	0.00717791	Distal Intergenic	6	124904361	124911705	7345	2	16768	10372	ENSMUSG00000030124	Lag3	lymphocyte-activation gene 3	14789;14788;12504;16768;69202;442825;30853	0;0;0;0;0;0;0	chr6:124900933-124901333	Tet_TH0	Closed
Stau2	1.12196e-19	1.29861e-18	4.73295																										Tet_TH0
Ica1l	4.20411e-29	7.45072e-28	70.1917																										Tet_TH0
Mgst2	4.58932e-55	1.72228e-53	-4.91308	chr3	51654670	51655070	401	*	5.02926	3.5002	5.93332	-2.09118	2.30724e-09	1.47349e-07	Distal Intergenic	3	51660360	51682677	22318	1	211666	-5290	ENSMUSG00000074604	Mgst2	microsomal glutathione S-transferase 2	211666;433586	-5290;0	chr3:51654670-51655070	Tet_TH0	Open
Rgs9	5.52605e-07	2.4573e-06	4.7635																										Tet_TH0
H2-Eb1	3.58901e-17	3.57402e-16	4.88943																										Tet_TH0
Vcam1	8.25082e-13	6.21522e-12	7.13291																										Tet_TH0
Gm26771	2.49718e-32	4.97352e-31	-91.6663																										Tet_TH0
Gm43063	8.83175e-32	1.72748e-30	-185.97																										Tet_TH0
Cr2	1.11433e-09	6.50879e-09	6.96409																										Tet_TH0
Popdc2	2.09063e-19	2.39573e-18	17.2253																										Tet_TH0
Sycp2l	3.52632e-20	4.17465e-19	10.6206																										Tet_TH0
Epas1	1.72537e-58	7.0209e-57	-6.67928	chr17	86801869	86802269	401	*	4.67748	2.73354	5.66792	-2.59972	9.63764e-14	3.09945e-11	Intron (ENSMUST00000024954.10/13819, intron 2 of 15)	17	86753700	86833410	79711	1	13819	48169	ENSMUSG00000024140	Epas1	endothelial PAS domain protein 1	13819	0	chr17:86801869-86802269	Tet_TH0	Open
Epas1	1.72537e-58	7.0209e-57	-6.67928	chr17	86783262	86783662	401	*	4.18548	2.99842	4.99096	-1.66803	2.9498e-06	5.78743e-05	Intron (ENSMUST00000024954.10/13819, intron 1 of 15)	17	86753700	86833410	79711	1	13819	29562	ENSMUSG00000024140	Epas1	endothelial PAS domain protein 1	13819	0	chr17:86783262-86783662	Tet_TH0	Open
Epas1	1.72537e-58	7.0209e-57	-6.67928	chr17	86709780	86710180	401	*	4.26408	3.39272	4.9462	-1.27288	0.000370027	0.00329738	Distal Intergenic	17	86753700	86833410	79711	1	13819	-43520	ENSMUSG00000024140	Epas1	endothelial PAS domain protein 1	13819	0	chr17:86709780-86710180	Tet_TH0	Open
4632404H12Rik	7.6811e-53	2.78195e-51	-5.92041																										Tet_TH0
Otub2	1.55258e-25	2.38142e-24	4.17427	chr12	103388455	103388855	401	*	5.00164	5.42802	4.11674	1.19216	0.000214953	0.00208859	Promoter (<=1kb)	12	103388682	103406350	17669	1	68149	0	ENSMUSG00000021203	Otub2	OTU domain, ubiquitin aldehyde binding 2	65256;68149;27225;52668	0;0;0;0	chr12:103388455-103388855	Tet_TH0	Closed
Dennd2c	3.47915e-25	5.24348e-24	-18.1131	chr3	103091766	103092166	401	*	4.73144	2.55685	5.75859	-2.77749	8.99866e-15	4.20939e-12	Intron (ENSMUST00000090715.12/229665, intron 9 of 15)	3	103102604	103169769	67166	1	329727	-10438	ENSMUSG00000007379	Dennd2c	DENN/MADD domain containing 2C	229663;18176;229665;329727	0;0;0;0	chr3:103091766-103092166	Tet_TH0	Open
Dbhos	3.00397e-17	3.00296e-16	28.9862																										Tet_TH0
Micall2	1.90546e-09	1.09177e-08	12.2277																										Tet_TH0
Ccdc120	1.62918e-17	1.65982e-16	30.3543																										Tet_TH0
Gm46209	9.74608e-52	3.45744e-50	-4.07938																										Tet_TH0
Gm5864	5.22948e-30	9.60419e-29	-17.9474																										Tet_TH0
Serpinf1	4.45057e-25	6.67843e-24	54.2309	chr11	75429011	75429411	401	*	4.36976	3.0221	5.2253	-1.89759	7.15276e-08	2.52832e-06	Distal Intergenic	11	75409769	75422701	12933	2	20317	-6310	ENSMUSG00000000753	Serpinf1	serine (or cysteine) peptidase inhibitor, clade F, member 1	319822;20317;18816;192652;100042498;380712;387141	0;0;10180;0;0;0;-34305	chr11:75429011-75429411	Tet_TH0	Open
Cpne4	2.32206e-17	2.34272e-16	-19.2908																										Tet_TH0
Cdk1	2.53538e-13	1.98106e-12	5.73018																										Tet_TH0
E2f8	2.68402e-08	1.37128e-07	6.48788																										Tet_TH0
Car12	3.48282e-30	6.44772e-29	-7.00243	chr9	66680081	66680481	401	*	4.71846	2.58741	5.73919	-2.42449	1.45466e-07	4.55612e-06	Distal Intergenic	9	66713686	66766845	53160	1	76459	-33205	ENSMUSG00000032373	Car12	carbonic anhydrase 12	76459	0	chr9:66680081-66680481	Tet_TH0	Open
Car12	3.48282e-30	6.44772e-29	-7.00243	chr9	66705827	66706227	401	*	4.39553	3.4026	5.12966	-1.47375	3.07502e-05	0.000415295	Distal Intergenic	9	66713686	66766845	53160	1	76459	-7459	ENSMUSG00000032373	Car12	carbonic anhydrase 12	76459	0	chr9:66705827-66706227	Tet_TH0	Open
Dagla	2.15259e-11	1.44432e-10	11.7517	chr19	10290603	10291003	401	*	3.72194	4.18334	2.71469	1.28284	0.000829432	0.0064442	Exon (ENSMUST00000237496.1/ENSMUST00000237496.1, exon 1 of 2)	19	10245265	10304877	59613	2	269060	13874	ENSMUSG00000035735	Dagla	diacylglycerol lipase, alpha	225908;269060	0;0	chr19:10290603-10291003	Tet_TH0	Closed
Tpx2	9.44362e-11	5.99888e-10	5.12705																										Tet_TH0
Ttll11	1.45154e-17	1.48175e-16	4.41247																										Tet_TH0
Il1rl2	1.05907e-30	1.99626e-29	-4.82162																										Tet_TH0
Apol9b	5.89931e-26	9.24686e-25	4.1998																										Tet_TH0
Gm17745	2.83807e-27	4.67078e-26	65.5587																										Tet_TH0
4930558J18Rik	1.75681e-16	1.67244e-15	27.7053																										Tet_TH0
Prkd3	1.6e-25	2.45054e-24	-10.4405																										Tet_TH0
Tshz2	4.53277e-15	3.96245e-14	21.3949																										Tet_TH0
Drc1	7.38996e-30	1.35241e-28	-134.83																										Tet_TH0
Mir17hg	2.34851e-25	3.57322e-24	-6.29138																										Tet_TH0
Pik3ap1	3.18234e-35	7.04835e-34	44.8075																										Tet_TH0
Zfp652	2.52469e-42	7.0804e-41	-4.01241																										Tet_TH0
Akap6	2.81048e-07	1.29441e-06	9.17421	chr12	52796395	52796795	401	*	4.86252	3.31186	5.77187	-2.1561	2.50159e-10	2.25262e-08	Intron (ENSMUST00000095737.4/238161, intron 2 of 13)	12	52699383	53155599	456217	1	238161	97012	ENSMUSG00000061603	Akap6	A kinase (PRKA) anchor protein 6	238161	0	chr12:52796395-52796795	Tet_TH0	Open
Akap6	2.81048e-07	1.29441e-06	9.17421	chr12	52729394	52729794	401	*	3.84868	2.20948	4.77869	-2.18129	3.34133e-08	1.33393e-06	Intron (ENSMUST00000095737.4/238161, intron 1 of 13)	12	52699383	53155599	456217	1	238161	30011	ENSMUSG00000061603	Akap6	A kinase (PRKA) anchor protein 6	238161	0	chr12:52729394-52729794	Tet_TH0	Open
Akap6	2.81048e-07	1.29441e-06	9.17421	chr12	52701164	52701564	401	*	3.64448	2.75807	4.33337	-1.25832	0.00112678	0.00829972	Promoter (1-2kb)	12	52699383	53155599	456217	1	238161	1781	ENSMUSG00000061603	Akap6	A kinase (PRKA) anchor protein 6	238161	0	chr12:52701164-52701564	Tet_TH0	Open
Spef2	8.20295e-18	8.54169e-17	-6.03279	chr15	9701837	9702237	401	*	4.51648	2.77926	5.46762	-2.30136	2.90491e-10	2.53346e-08	Intron (ENSMUST00000160236.7/320277, intron 9 of 34)	15	9578193	9748868	170676	2	320277	46631	ENSMUSG00000072663	Spef2	sperm flagellar 2	320277	0	chr15:9701837-9702237	Tet_TH0	Open
Gem	9.62963e-42	2.64694e-40	40.4522	chr4	11721220	11721620	401	*	4.68901	5.14545	3.69992	1.36263	0.00013705	0.00144298	Distal Intergenic	4	11704457	11714752	10296	1	14579	16763	ENSMUSG00000028214	Gem	GTP binding protein (gene overexpressed in skeletal muscle)	14579;12557	0;-36527	chr4:11721220-11721620	Tet_TH0	Closed
Slc7a7	1.42334e-11	9.72301e-11	7.3123																										Tet_TH0
Garem1	2.26332e-09	1.29147e-08	7.52326																										Tet_TH0
Serpina3g	2.48933e-57	9.80285e-56	98.6125																										Tet_TH0
Gm37206	2.70147e-35	5.9961e-34	-4.90327																										Tet_TH0
Cacna1d	9.15981e-58	3.64164e-56	85.1753																										Tet_TH0
Zeb2	7.97843e-29	1.39491e-27	25.0253																										Tet_TH0
Rgs8	3.48327e-18	3.70519e-17	33.0088	chr1	153617366	153617766	401	*	4.18403	4.84729	2.01129	1.99273	0.000135632	0.00143211	Distal Intergenic	1	153653025	153700323	47299	1	67792	-35259	ENSMUSG00000042671	Rgs8	regulator of G-protein signaling 8	67792	0	chr1:153617366-153617766	Tet_TH0	Closed
Naprt	6.60058e-26	1.03071e-24	7.73429																										Tet_TH0
Pawr	1.59949e-12	1.17669e-11	11.2411																										Tet_TH0
Prickle2	4.11445e-23	5.59916e-22	40.1312																										Tet_TH0
Dusp14	1.76798e-35	3.95801e-34	59.1103																										Tet_TH0
Pygm	1.81771e-12	1.32921e-11	-5.35156																										Tet_TH0
Dsp	2.10633e-37	5.01869e-36	79.1765																										Tet_TH0
Capg	2.63748e-99	2.29019e-97	8.6638																										Tet_TH0
Dmbt1	3.82542e-20	4.5133e-19	-21.8324	chr7	131045471	131045871	401	*	4.69103	2.64162	5.6991	-2.63296	9.62418e-13	2.0512e-10	Intron (ENSMUST00000084509.5/12945, intron 5 of 46)	7	131032046	131121628	89583	1	12945	13425	ENSMUSG00000047517	Dmbt1	deleted in malignant brain tumors 1	14183;12945	0;0	chr7:131045471-131045871	Tet_TH0	Open
Dmbt1	3.82542e-20	4.5133e-19	-21.8324	chr7	131055020	131055420	401	*	4.19269	2.40937	5.15318	-2.36025	6.90823e-10	5.33396e-08	Intron (ENSMUST00000084509.5/12945, intron 10 of 46)	7	131032046	131121628	89583	1	12945	22974	ENSMUSG00000047517	Dmbt1	deleted in malignant brain tumors 1	14183;12945	0;0	chr7:131055020-131055420	Tet_TH0	Open
Dmbt1	3.82542e-20	4.5133e-19	-21.8324	chr7	131036335	131036735	401	*	3.66258	2.39005	4.49561	-1.72963	1.64234e-05	0.00024384	Intron (ENSMUST00000084509.5/12945, intron 2 of 46)	7	131032046	131121628	89583	1	12945	4289	ENSMUSG00000047517	Dmbt1	deleted in malignant brain tumors 1	14183;12945	0;0	chr7:131036335-131036735	Tet_TH0	Open
Lyn	1.86425e-11	1.26022e-10	6.13736																										Tet_TH0
Kirrel3	9.73769e-27	1.56778e-25	61.0407																										Tet_TH0
Pdlim4	1.70926e-19	1.96413e-18	-27.6073	chr11	54082674	54083074	401	*	4.40683	1.58529	5.50763	-3.19799	1.88434e-13	5.26139e-11	Distal Intergenic	11	54054928	54069014	14087	2	30794	-13660	ENSMUSG00000020388	Pdlim4	PDZ and LIM domain 4	30794;18452	0;0	chr11:54082674-54083074	Tet_TH0	Open
Pdlim4	1.70926e-19	1.96413e-18	-27.6073	chr11	54063130	54063530	401	*	5.12927	3.62904	6.02613	-2.16359	1.72158e-11	2.38499e-09	Intron (ENSMUST00000018755.9/30794, intron 2 of 6)	11	54054928	54069014	14087	2	30794	5484	ENSMUSG00000020388	Pdlim4	PDZ and LIM domain 4	30805;30794;18452	-35040;0;0	chr11:54063130-54063530	Tet_TH0	Open
AC151971.3	2.6671e-07	1.23137e-06	9.18145																										Tet_TH0
AC154627.3	1.0386e-24	1.53628e-23	55.2303																										Tet_TH0
Ndrg4	5.20862e-15	4.53417e-14	6.36998																										Tet_TH0
Tex15	1.48172e-37	3.54673e-36	92.3455																										Tet_TH0
Adamts14	9.13081e-19	1.00366e-17	-44.4206	chr10	61233182	61233582	401	*	6.07442	2.79607	7.20924	-3.88847	1.48484e-26	5.34826e-22	Intron (ENSMUST00000092486.10/237360, intron 4 of 21)	10	61197112	61273438	76327	2	237360	39856	ENSMUSG00000059901	Adamts14	a disintegrin-like and metallopeptidase (reprolysin type) with thrombospondin type 1 motif, 14	65971;237360	61228;0	chr10:61233182-61233582	Tet_TH0	Open
Fndc3b	1.76955e-15	1.58223e-14	5.005																										Tet_TH0
Slc17a9	3.19106e-23	4.37411e-22	-7.60515																										Tet_TH0
Slc40a1	6.13181e-12	4.31514e-11	7.49693																										Tet_TH0
Gm34006	1.42985e-15	1.28848e-14	-9.24868																										Tet_TH0
Gm2237	1.84198e-17	1.86836e-16	10.5858																										Tet_TH0
Mypop	1.74383e-30	3.25155e-29	7.39719																										Tet_TH0
Adgre1	2.26066e-10	1.39879e-09	8.50472																										Tet_TH0
Lef1	1.19016e-37	2.85212e-36	-7.4272	chr3	131190636	131191036	401	*	5.00025	2.97953	6.00367	-2.6948	9.36627e-15	4.32518e-12	Exon (ENSMUST00000029611.13/16842, exon 6 of 12)	3	131110471	131224356	113886	1	16842	80165	ENSMUSG00000027985	Lef1	lymphoid enhancer binding factor 1	16842;15107	0;0	chr3:131190636-131191036	Tet_TH0	Open
Lef1	1.19016e-37	2.85212e-36	-7.4272	chr3	131167706	131168106	401	*	4.55652	2.55261	5.55718	-2.53606	2.64722e-11	3.53149e-09	Intron (ENSMUST00000029611.13/16842, intron 3 of 11)	3	131110471	131224356	113886	1	16842	57235	ENSMUSG00000027985	Lef1	lymphoid enhancer binding factor 1	16842	0	chr3:131167706-131168106	Tet_TH0	Open
Lef1	1.19016e-37	2.85212e-36	-7.4272	chr3	131170111	131170511	401	*	4.59637	3.00155	5.51622	-2.147	2.57003e-09	1.60368e-07	Intron (ENSMUST00000029611.13/16842, intron 3 of 11)	3	131110471	131224356	113886	1	16842	59640	ENSMUSG00000027985	Lef1	lymphoid enhancer binding factor 1	16842	0	chr3:131170111-131170511	Tet_TH0	Open
Lef1	1.19016e-37	2.85212e-36	-7.4272	chr3	131138245	131138645	401	*	4.03338	2.35448	4.97216	-2.25293	5.32017e-09	2.9167e-07	Exon (ENSMUST00000200349.1/ENSMUST00000200349.1, exon 1 of 1)	3	131110471	131224356	113886	1	16842	27774	ENSMUSG00000027985	Lef1	lymphoid enhancer binding factor 1	16842	0	chr3:131138245-131138645	Tet_TH0	Open
Lef1	1.19016e-37	2.85212e-36	-7.4272	chr3	131057281	131057681	401	*	5.20671	3.83733	6.06847	-1.95673	1.53718e-08	6.99088e-07	Distal Intergenic	3	131110471	131224356	113886	1	16842	-52790	ENSMUSG00000027985	Lef1	lymphoid enhancer binding factor 1			chr3:131057281-131057681	Tet_TH0	Open
Lef1	1.19016e-37	2.85212e-36	-7.4272	chr3	131026345	131026745	401	*	3.9366	2.17056	4.89364	-2.26552	1.73886e-08	7.72282e-07	Exon (ENSMUST00000197848.1/ENSMUST00000197848.1, exon 1 of 1)	3	131110471	131224356	113886	1	16842	-83726	ENSMUSG00000027985	Lef1	lymphoid enhancer binding factor 1			chr3:131026345-131026745	Tet_TH0	Open
Lef1	1.19016e-37	2.85212e-36	-7.4272	chr3	131157458	131157858	401	*	6.22893	5.21454	6.97161	-1.60405	3.32324e-08	1.33168e-06	Intron (ENSMUST00000029611.13/16842, intron 3 of 11)	3	131110471	131224356	113886	1	16842	46987	ENSMUSG00000027985	Lef1	lymphoid enhancer binding factor 1	16842	0	chr3:131157458-131157858	Tet_TH0	Open
Lef1	1.19016e-37	2.85212e-36	-7.4272	chr3	131093711	131094111	401	*	4.23722	2.77138	5.12524	-1.98165	1.63272e-07	5.00501e-06	Distal Intergenic	3	131110471	131224356	113886	1	16842	-16360	ENSMUSG00000027985	Lef1	lymphoid enhancer binding factor 1	16842	0	chr3:131093711-131094111	Tet_TH0	Open
Lef1	1.19016e-37	2.85212e-36	-7.4272	chr3	131014270	131014670	401	*	4.75654	3.72638	5.50539	-1.57276	1.48926e-06	3.2256e-05	Distal Intergenic	3	131110471	131224356	113886	1	16842	-95801	ENSMUSG00000027985	Lef1	lymphoid enhancer binding factor 1			chr3:131014270-131014670	Tet_TH0	Open
Lef1	1.19016e-37	2.85212e-36	-7.4272	chr3	130979231	130979631	401	*	3.67712	2.39181	4.51408	-1.82599	2.43994e-06	4.89606e-05	Distal Intergenic	3	131110471	131224356	113886	1	16842	-130840	ENSMUSG00000027985	Lef1	lymphoid enhancer binding factor 1			chr3:130979231-130979631	Tet_TH0	Open
Lef1	1.19016e-37	2.85212e-36	-7.4272	chr3	131160231	131160631	401	*	4.64617	3.65971	5.37769	-1.50028	3.32114e-06	6.40665e-05	Intron (ENSMUST00000029611.13/16842, intron 3 of 11)	3	131110471	131224356	113886	1	16842	49760	ENSMUSG00000027985	Lef1	lymphoid enhancer binding factor 1	16842	0	chr3:131160231-131160631	Tet_TH0	Open
Lef1	1.19016e-37	2.85212e-36	-7.4272	chr3	130947236	130947636	401	*	5.80661	4.99796	6.45932	-1.30117	3.458e-05	0.00045893	Distal Intergenic	3	131110471	131224356	113886	1	16842	-162835	ENSMUSG00000027985	Lef1	lymphoid enhancer binding factor 1			chr3:130947236-130947636	Tet_TH0	Open
Lef1	1.19016e-37	2.85212e-36	-7.4272	chr3	130936950	130937350	401	*	4.45512	3.67342	5.09459	-1.20516	0.000224946	0.00217181	Exon (ENSMUST00000196438.2/ENSMUST00000196438.2, exon 1 of 3)	3	131110471	131224356	113886	1	16842	-173121	ENSMUSG00000027985	Lef1	lymphoid enhancer binding factor 1			chr3:130936950-130937350	Tet_TH0	Open
Lef1	1.19016e-37	2.85212e-36	-7.4272	chr3	131117426	131117826	401	*	3.99882	3.18731	4.65291	-1.24719	0.000311916	0.00284952	Intron (ENSMUST00000029611.13/16842, intron 3 of 11)	3	131110471	131224356	113886	1	16842	6955	ENSMUSG00000027985	Lef1	lymphoid enhancer binding factor 1	16842	0	chr3:131117426-131117826	Tet_TH0	Open
Lef1	1.19016e-37	2.85212e-36	-7.4272	chr3	131125849	131126249	401	*	4.20518	3.43747	4.83763	-1.22906	0.000368116	0.00328279	Intron (ENSMUST00000029611.13/16842, intron 3 of 11)	3	131110471	131224356	113886	1	16842	15378	ENSMUSG00000027985	Lef1	lymphoid enhancer binding factor 1	16842	0	chr3:131125849-131126249	Tet_TH0	Open
Lef1	1.19016e-37	2.85212e-36	-7.4272	chr3	131139677	131140077	401	*	4.09123	3.2513	4.75884	-1.24671	0.000418705	0.00364724	Intron (ENSMUST00000029611.13/16842, intron 3 of 11)	3	131110471	131224356	113886	1	16842	29206	ENSMUSG00000027985	Lef1	lymphoid enhancer binding factor 1	16842	0	chr3:131139677-131140077	Tet_TH0	Open
Lef1	1.19016e-37	2.85212e-36	-7.4272	chr3	131117843	131118243	401	*	5.71046	4.98249	6.32241	-1.1441	0.000633372	0.00513919	Intron (ENSMUST00000029611.13/16842, intron 3 of 11)	3	131110471	131224356	113886	1	16842	7372	ENSMUSG00000027985	Lef1	lymphoid enhancer binding factor 1	16842	0	chr3:131117843-131118243	Tet_TH0	Open
Cobll1	6.2029e-27	1.00806e-25	4.98125	chr2	65188643	65189043	401	*	4.38079	3.3784	5.11871	-1.48143	1.11003e-05	0.000175901	Intron (ENSMUST00000112429.8/319876, intron 1 of 13)	2	65088339	65239403	151065	2	319876	50360	ENSMUSG00000034903	Cobll1	Cobl-like 1	319876	0	chr2:65188643-65189043	Tet_TH0	Open
B430306N03Rik	2.74681e-63	1.26677e-61	-39.8084	chr17	48318802	48319202	401	*	3.75198	2.87076	4.43855	-1.26395	0.000753437	0.00594804	Exon (ENSMUST00000049614.12/320148, exon 3 of 6)	17	48316141	48327024	10884	1	320148	2661	ENSMUSG00000043740	B430306N03Rik	RIKEN cDNA B430306N03 gene	224840;328833;320148;83433;71326	54507;0;0;-27199;-40714	chr17:48318802-48319202	Tet_TH0	Open
Kcnma1	1.4485e-32	2.92703e-31	92.7797																										Tet_TH0
Slc35f5	2.83139e-25	4.2953e-24	19.8457																										Tet_TH0
Cacnb3	2.12564e-15	1.89085e-14	-4.70991																										Tet_TH0
Cst7	4.79991e-68	2.44148e-66	4.87182	chr2	150578573	150578973	401	*	5.14373	3.92132	5.96087	-1.77329	2.20726e-07	6.4742e-06	3' UTR	2	150570415	150578944	8530	1	13011	8158	ENSMUSG00000068129	Cst7	cystatin F (leukocystatin)	13011;71881;68738	0;0;0	chr2:150578573-150578973	Tet_TH0	Open
Cst7	4.79991e-68	2.44148e-66	4.87182	chr2	150570150	150570550	401	*	5.54095	4.86521	6.12462	-1.0905	0.000429979	0.0037337	Promoter (<=1kb)	2	150570415	150578944	8530	1	13011	0	ENSMUSG00000068129	Cst7	cystatin F (leukocystatin)	13011;71881;68738	0;0;0	chr2:150570150-150570550	Tet_TH0	Open
BC064078	5.55047e-17	5.46436e-16	13.2043																										Tet_TH0
Pkdcc	5.882e-24	8.38964e-23	55.513	chr17	83158114	83158514	401	*	3.66337	4.39772	0.544927	2.54876	1.45556e-06	3.17552e-05	Distal Intergenic	17	83215292	83225070	9779	1	106522	-56778	ENSMUSG00000024247	Pkdcc	protein kinase domain containing, cytoplasmic			chr17:83158114-83158514	Tet_TH0	Closed
Pkdcc	5.882e-24	8.38964e-23	55.513	chr17	83158705	83159105	401	*	3.86117	4.50527	1.85913	2.1212	1.95924e-06	4.0604e-05	Distal Intergenic	17	83215292	83225070	9779	1	106522	-56187	ENSMUSG00000024247	Pkdcc	protein kinase domain containing, cytoplasmic			chr17:83158705-83159105	Tet_TH0	Closed
H2-DMb2	2.91903e-31	5.62476e-30	13.716																										Tet_TH0
Kcnq3	4.15958e-22	5.35175e-21	44.7887																										Tet_TH0
Aurkb	4.08646e-09	2.26392e-08	5.84105																										Tet_TH0
Tmem86a	3.48894e-43	1.00985e-41	5.68452																										Tet_TH0
9630013D21Rik	1.09605e-25	1.69243e-24	46.2281																										Tet_TH0
Gzmk	3.44564e-36	7.91011e-35	99.6172																										Tet_TH0
6330403K07Rik	5.00289e-20	5.88911e-19	37.756																										Tet_TH0
Tlcd2	4.10603e-73	2.22487e-71	9.95574																										Tet_TH0
Srgap3	3.69041e-23	5.03201e-22	44.1101	chr6	112852327	112852727	401	*	4.88569	4.08066	5.53664	-1.26859	7.85412e-05	0.000912867	Intron (ENSMUST00000088373.10/259302, intron 1 of 21)	6	112717971	112947266	229296	2	259302	94539	ENSMUSG00000030257	Srgap3	SLIT-ROBO Rho GTPase activating protein 3	259302	0	chr6:112852327-112852727	Tet_TH0	Open
Ces2g	2.45381e-13	1.91949e-12	20.4328																										Tet_TH0
Myo1b	1.14538e-11	7.88919e-11	16.7714	chr1	51934573	51934973	401	*	4.33884	3.14527	5.1465	-1.73683	9.79862e-07	2.26096e-05	Distal Intergenic	1	51749765	51916071	166307	2	17912	-18502	ENSMUSG00000018417	Myo1b	myosin IB	17912	0	chr1:51934573-51934973	Tet_TH0	Open
Gm9885	1.47345e-22	1.93903e-21	48.8149																										Tet_TH0
Kif4	4.18654e-12	2.98158e-11	7.81401																										Tet_TH0
Ptprs	4.6511e-39	1.17283e-37	6.41558																										Tet_TH0
Spp1	3.28286e-36	7.54475e-35	175.737																										Tet_TH0
Cela1	2.33807e-18	2.51149e-17	14.1737	chr15	100706276	100706676	401	*	6.38766	5.78093	6.9314	-0.986862	0.00137569	0.00977722	Intron (ENSMUST00000159715.7/207839, intron 4 of 11)	15	100674421	100687921	13501	2	109901	-18355	ENSMUSG00000023031	Cela1	chymotrypsin-like elastase family, member 1	668218;109901;207839;619313	0;0;0;0	chr15:100706276-100706676	Tet_TH0	Open
Rasgrp2	3.23288e-10	1.97155e-09	-4.92738																										Tet_TH0
Adam33	5.46891e-18	5.76708e-17	33.1884																										Tet_TH0
Rian	2.01866e-20	2.40351e-19	42.2234																										Tet_TH0
Nrg2	9.58543e-39	2.39382e-37	-35.6149																										Tet_TH0
Stk3	2.6119e-20	3.10452e-19	4.16163																										Tet_TH0
C3	0.000404519	0.00122465	4.30939																										Tet_TH0
Kifc3	5.22654e-20	6.14193e-19	9.06466	chr8	95247304	95247704	401	*	4.26649	3.31242	4.98466	-1.39306	0.000112298	0.00122832	Intron (ENSMUST00000119870.8/333329, intron 31 of 32)	8	95099828	95202812	102985	2	16582	-44492	ENSMUSG00000031788	Kifc3	kinesin family member C3	16582;333329	0;0	chr8:95247304-95247704	Tet_TH0	Open
Renbp	2.92047e-14	2.42434e-13	5.02443																										Tet_TH0
Tspan17	1.25811e-21	1.59496e-20	7.64282																										Tet_TH0
Kndc1	7.25937e-16	6.65726e-15	15.8799	chr7	139914245	139914645	401	*	3.76834	4.22658	2.77271	1.24062	0.00137145	0.00975482	3' UTR	7	139894696	139941537	46842	1	76484	19549	ENSMUSG00000066129	Kndc1	kinase non-catalytic C-lobe domain (KIND) containing 1	52389;76484;22286;102465788;387198	80071;0;0;42977;43115	chr7:139914245-139914645	Tet_TH0	Closed
Spin4	5.93159e-22	7.60336e-21	33.2863																										Tet_TH0
Gm20559	7.1871e-81	4.51981e-79	-4.57605																										Tet_TH0
F730311O21Rik	4.16314e-12	2.96593e-11	-7.67679																										Tet_TH0
Lix1l	1.56217e-22	2.05188e-21	15.8617																										Tet_TH0
Rtl8c	3.97586e-40	1.03139e-38	4.62395																										Tet_TH0
Arhgef5	4.09921e-18	4.34701e-17	8.76263																										Tet_TH0
Ntf5	2.83807e-14	2.35688e-13	16.7972																										Tet_TH0
Mcm10	1.168e-12	8.6911e-12	7.65941																										Tet_TH0
Noxa1	5.20029e-08	2.58557e-07	10.4236																										Tet_TH0
Lrp3	1.7996e-09	1.03311e-08	12.448																										Tet_TH0
Fam19a3	1.32054e-14	1.11585e-13	-9.32002																										Tet_TH0
Trim36	5.05812e-12	3.57653e-11	-4.77152	chr18	46200867	46201267	401	*	4.35442	3.68093	4.93683	-1.04313	0.00118037	0.00862036	Intron (ENSMUST00000037011.5/28105, intron 1 of 9)	18	46165300	46212607	47308	2	28105	11340	ENSMUSG00000033949	Trim36	tripartite motif-containing 36	28105;225467	0;0	chr18:46200867-46201267	Tet_TH0	Open
Lclat1	1.3164e-70	6.91629e-69	4.53162	chr17	73163645	73164045	401	*	4.99418	4.04413	5.71067	-1.46582	3.65548e-06	6.93712e-05	Intron (ENSMUST00000149064.8/225010, intron 2 of 4)	17	73107985	73243368	135384	1	225010	55660	ENSMUSG00000054469	Lclat1	lysocardiolipin acyltransferase 1	225010	0	chr17:73163645-73164045	Tet_TH0	Open
Lclat1	1.3164e-70	6.91629e-69	4.53162	chr17	73087035	73087435	401	*	5.00434	4.25913	5.62529	-1.1492	0.000441184	0.00380678	Distal Intergenic	17	73107985	73243368	135384	1	225010	-20550	ENSMUSG00000054469	Lclat1	lysocardiolipin acyltransferase 1	225010	0	chr17:73087035-73087435	Tet_TH0	Open
Sox8	1.27964e-16	1.2289e-15	28.6745																										Tet_TH0
Tnfaip3	0	0	21.2643																										Tet_TH0
Nuf2	3.96415e-09	2.20027e-08	6.00192																										Tet_TH0
AC238811.2	5.34896e-12	3.77446e-11	18.8349																										Tet_TH0
Nrgn	6.59179e-16	6.06112e-15	27.8026																										Tet_TH0
4930431P03Rik	9.80119e-23	1.3022e-21	9.23301	chr14	45041046	45041446	401	*	4.65678	5.34583	2.21222	2.19378	2.26433e-05	0.000320593	Distal Intergenic	14	44955215	44989699	34485	2	73895	-51347	ENSMUSG00000075042	4930431P03Rik	RIKEN cDNA 4930431P03 gene	19217	0	chr14:45041046-45041446	Tet_TH0	Closed
4930431P03Rik	9.80119e-23	1.3022e-21	9.23301	chr14	45005852	45006252	401	*	4.48027	5.08568	2.76613	1.68685	0.000514185	0.00431913	Intron (ENSMUST00000168000.1/ENSMUST00000168000.1, intron 1 of 4)	14	44955215	44989699	34485	2	73895	-16153	ENSMUSG00000075042	4930431P03Rik	RIKEN cDNA 4930431P03 gene	73895;19217	0;0	chr14:45005852-45006252	Tet_TH0	Closed
4930431P03Rik	9.80119e-23	1.3022e-21	9.23301	chr14	45038036	45038436	401	*	3.9947	4.65039	1.89212	1.74481	0.000529115	0.00442572	Distal Intergenic	14	44955215	44989699	34485	2	73895	-48337	ENSMUSG00000075042	4930431P03Rik	RIKEN cDNA 4930431P03 gene	73895;19217	0;0	chr14:45038036-45038436	Tet_TH0	Closed
Gatm	2.28134e-13	1.78794e-12	10.396																										Tet_TH0
Entpd1	1.61805e-173	3.46179e-171	48.8249																										Tet_TH0
Gprc5b	2.00846e-12	1.46766e-11	-4.2672	chr7	118976597	118976997	401	*	3.85446	3.02166	4.51871	-1.24021	0.000567057	0.00468998	Exon (ENSMUST00000008878.9/64297, exon 3 of 4)	7	118972047	118995211	23165	2	64297	18214	ENSMUSG00000008734	Gprc5b	G protein-coupled receptor, family C, group 5, member B	434232;64297	0;0	chr7:118976597-118976997	Tet_TH0	Open
Zfp964	9.14809e-29	1.59538e-27	7.96932																										Tet_TH0
Gm6637	1.04583e-25	1.61851e-24	62.3183																										Tet_TH0
Galr3	1.09169e-11	7.52936e-11	17.1415																										Tet_TH0
Rab11fip5	2.95877e-41	7.98483e-40	10.3231																										Tet_TH0
D030028A08Rik	1.89918e-36	4.42851e-35	-8.74793																										Tet_TH0
Prr11	8.82965e-12	6.14287e-11	6.45911																										Tet_TH0
Themis2	3.43014e-45	1.04994e-43	29.1																										Tet_TH0
Gm12305	6.7708e-18	7.10386e-17	20.4764																										Tet_TH0
Oaf	8.12799e-12	5.66421e-11	14.8674																										Tet_TH0
Plekho1	4.33751e-50	1.48542e-48	9.4311																										Tet_TH0
Adra2a	2.6848e-10	1.64943e-09	12.9902																										Tet_TH0
E430014B02Rik	4.55517e-39	1.15004e-37	-19.5339																										Tet_TH0
Anxa4	3.0439e-26	4.81113e-25	7.52238																										Tet_TH0
Stil	2.31271e-08	1.19155e-07	5.71328																										Tet_TH0
Chst11	4.95406e-46	1.55304e-44	21.1101	chr10	83153868	83154268	401	*	4.18507	2.67871	5.08348	-2.12378	4.60608e-09	2.58824e-07	Intron (ENSMUST00000040110.7/58250, intron 2 of 2)	10	82985498	83195900	210403	1	58250	168370	ENSMUSG00000034612	Chst11	carbohydrate sulfotransferase 11	58250	0	chr10:83153868-83154268	Tet_TH0	Open
Chst11	4.95406e-46	1.55304e-44	21.1101	chr10	83129634	83130034	401	*	3.53058	2.54755	4.26071	-1.33072	0.000837742	0.00649755	Intron (ENSMUST00000040110.7/58250, intron 2 of 2)	10	82985498	83195900	210403	1	58250	144136	ENSMUSG00000034612	Chst11	carbohydrate sulfotransferase 11	58250	0	chr10:83129634-83130034	Tet_TH0	Open
Chst11	4.95406e-46	1.55304e-44	21.1101	chr10	83140505	83140905	401	*	3.91847	3.07962	4.58557	-1.22729	0.0013025	0.00935865	Intron (ENSMUST00000040110.7/58250, intron 2 of 2)	10	82985498	83195900	210403	1	58250	155007	ENSMUSG00000034612	Chst11	carbohydrate sulfotransferase 11	58250	0	chr10:83140505-83140905	Tet_TH0	Open
Slc25a13	1.05149e-22	1.39435e-21	5.89224																										Tet_TH0
Bicd1	2.07829e-09	1.18752e-08	8.05955																										Tet_TH0
Gm14718	5.28939e-17	5.21476e-16	10.2024	chrX	57177320	57177720	401	*	4.96818	5.42121	3.99144	1.30552	0.000197262	0.00194449	Distal Intergenic	20	57200643	57204378	3736	1	100502842	-22923	ENSMUSG00000085808	Gm14718	predicted gene 14718	100502842;21947	0;0	chrX:57177320-57177720	Tet_TH0	Closed
Gm14718	5.28939e-17	5.21476e-16	10.2024	chrX	57189347	57189747	401	*	4.66514	3.35286	5.51027	-1.86338	2.72285e-08	1.12392e-06	Distal Intergenic	20	57200643	57204378	3736	1	100502842	-10896	ENSMUSG00000085808	Gm14718	predicted gene 14718	100502842;21947;73341	0;0;0	chrX:57189347-57189747	Tet_TH0	Open
Gm14718	5.28939e-17	5.21476e-16	10.2024	chrX	57167708	57168108	401	*	3.86096	3.03423	4.52234	-1.26583	0.000352448	0.00316304	Distal Intergenic	20	57200643	57204378	3736	1	100502842	-32535	ENSMUSG00000085808	Gm14718	predicted gene 14718	100502842;21947	0;0	chrX:57167708-57168108	Tet_TH0	Open
Cxcl10	3.65933e-45	1.11844e-43	92.0936																										Tet_TH0
Mafb	3.72623e-09	2.07654e-08	4.91554	chr2	160382922	160383322	401	*	3.50939	1.69987	4.47505	-2.2411	3.25014e-07	8.92958e-06	Distal Intergenic	2	160363703	160367065	3363	2	16658	-15857	ENSMUSG00000074622	Mafb	v-maf musculoaponeurotic fibrosarcoma oncogene family, protein B (avian)	329554;16658	-48760;0	chr2:160382922-160383322	Tet_TH0	Open
Mafb	3.72623e-09	2.07654e-08	4.91554	chr2	160471052	160471452	401	*	4.06298	3.29855	4.69377	-1.13893	0.000941002	0.00715062	Distal Intergenic	2	160363703	160367065	3363	2	16658	-103987	ENSMUSG00000074622	Mafb	v-maf musculoaponeurotic fibrosarcoma oncogene family, protein B (avian)			chr2:160471052-160471452	Tet_TH0	Open
Gm3739	5.72956e-15	4.98138e-14	24.7464																										Tet_TH0
Nek2	2.3915e-08	1.2297e-07	5.90287																										Tet_TH0
Lonrf3	4.49307e-09	2.47991e-08	7.79402																										Tet_TH0
Mmp14	1.32996e-23	1.85737e-22	5.72844																										Tet_TH0
Gm3095	5.50998e-11	3.57555e-10	16.3031																										Tet_TH0
Vwde	5.76838e-08	2.85434e-07	12.0519																										Tet_TH0
Gm28935	2.06118e-11	1.38747e-10	-5.95346																										Tet_TH0
8030451A03Rik	3.61138e-23	4.93396e-22	52.6629																										Tet_TH0
Slc30a3	1.54085e-24	2.25193e-23	33.0731																										Tet_TH0
Slco4a1	7.73744e-16	7.07691e-15	7.41596																										Tet_TH0
Mctp1	2.05528e-10	1.27513e-09	14.7355																										Tet_TH0
Armcx6	8.08138e-22	1.03335e-20	6.02536																										Tet_TH0
Kitl	2.94817e-16	2.77475e-15	8.2151																										Tet_TH0
AC158538.2	1.19613e-12	8.89089e-12	10.6006																										Tet_TH0
Vmn1r43	5.77953e-32	1.13582e-30	-5.45224																										Tet_TH0
Adgre4	1.3658e-09	7.91968e-09	13.2123																										Tet_TH0
Wdfy4	1.21418e-17	1.24742e-16	9.51957																										Tet_TH0
C1qc	1.33879e-09	7.76957e-09	9.51731																										Tet_TH0
Ecel1	7.51793e-16	6.8822e-15	28.6551																										Tet_TH0
Tmem26	2.49828e-17	2.51562e-16	22.1367	chr10	68633155	68633555	401	*	3.94574	2.5531	4.81404	-1.90713	8.97335e-07	2.11111e-05	Distal Intergenic	10	68723646	68782650	59005	1	327766	-90091	ENSMUSG00000060044	Tmem26	transmembrane protein 26			chr10:68633155-68633555	Tet_TH0	Open
Aifm2	1.47687e-17	1.50686e-16	7.801																										Tet_TH0
Lair1	5.16467e-34	1.08815e-32	-6.63971																										Tet_TH0
Pdlim1	1.93137e-27	3.21426e-26	-15.9652	chr19	40257413	40257813	401	*	4.97224	3.04921	5.95901	-2.5202	8.26142e-13	1.79258e-10	Intron (ENSMUST00000068439.12/54132, intron 1 of 6)	19	40221173	40271842	50670	2	54132	14029	ENSMUSG00000055044	Pdlim1	PDZ and LIM domain 1 (elfin)	102465114;54132;20411	0;0;0	chr19:40257413-40257813	Tet_TH0	Open
Pdlim1	1.93137e-27	3.21426e-26	-15.9652	chr19	40267437	40267837	401	*	4.37347	2.72669	5.30517	-2.30721	1.26446e-10	1.29756e-08	Intron (ENSMUST00000068439.12/54132, intron 1 of 6)	19	40221173	40271842	50670	2	54132	4005	ENSMUSG00000055044	Pdlim1	PDZ and LIM domain 1 (elfin)	102465114;54132;20411	0;0;0	chr19:40267437-40267837	Tet_TH0	Open
Gm14377	1.51566e-22	1.99331e-21	49.112																										Tet_TH0
Igf1	1.30116e-10	8.19019e-10	10.3097																										Tet_TH0
Hba-a1	6.4599e-24	9.19495e-23	8.95242																										Tet_TH0
Fam81a	1.78597e-31	3.45427e-30	69.7918																										Tet_TH0
Ms4a1	2.43561e-09	1.38635e-08	9.56423																										Tet_TH0
E2f7	1.11255e-07	5.34833e-07	5.56884																										Tet_TH0
Gpr34	3.10859e-22	4.03709e-21	-16.3128																										Tet_TH0
Lrrc49	3.52674e-24	5.0511e-23	37.1676																										Tet_TH0
Smim1	3.35504e-25	5.07117e-24	58.7765																										Tet_TH0
Cd300a	7.00565e-06	2.74007e-05	4.10401																										Tet_TH0
Hmmr	3.36077e-08	1.70113e-07	9.47579																										Tet_TH0
Nr4a2	3.27696e-29	5.84753e-28	40.5433																										Tet_TH0
Rasgrf1	0.00018686	0.000598813	5.53532																										Tet_TH0
Laptm4b	4.39143e-31	8.40732e-30	4.20212																										Tet_TH0
Pole2	3.82873e-25	5.76197e-24	-5.67266																										Tet_TH0
Mis18bp1	2.97028e-08	1.51084e-07	4.77098																										Tet_TH0
Gm16083	7.17048e-18	7.50424e-17	-27.1402																										Tet_TH0
Gjb2	1.16752e-24	1.7233e-23	29.0111	chr14	57104240	57104640	401	*	4.0415	4.55525	2.82277	1.47949	0.000176564	0.00177496	Promoter (<=1kb)	14	57098600	57104702	6103	2	14619	62	ENSMUSG00000046352	Gjb2	gap junction protein, beta 2	14611;14619;14623	-46140;0;28971	chr14:57104240-57104640	Tet_TH0	Closed
Itga9	5.84413e-42	1.61711e-40	39.9116																										Tet_TH0
Bub1	1.96723e-09	1.12623e-08	8.67757																										Tet_TH0
Gm15283	0.00228424	0.00608613	4.09445																										Tet_TH0
Etv5	3.02048e-23	4.14577e-22	6.28488	chr16	22461653	22462053	401	*	3.88822	3.05106	4.55453	-1.28734	0.000279652	0.0026001	Distal Intergenic	16	22381309	22439719	58411	2	104156	-21934	ENSMUSG00000013089	Etv5	ets variant 5	104156;110197;78082	0;0;-49427	chr16:22461653-22462053	Tet_TH0	Open
Etv5	3.02048e-23	4.14577e-22	6.28488	chr16	22466361	22466761	401	*	4.84187	4.13282	5.44376	-1.11536	0.000476528	0.0040625	Distal Intergenic	16	22381309	22439719	58411	2	104156	-26642	ENSMUSG00000013089	Etv5	ets variant 5	104156;110197;78082	0;0;-44719	chr16:22466361-22466761	Tet_TH0	Open
Actn1	2.14626e-40	5.60974e-39	-9.69273	chr12	80273156	80273556	401	*	4.78503	3.40636	5.64942	-2.00188	7.71959e-10	5.81698e-08	Distal Intergenic	12	80167547	80260371	92825	2	109711	-12785	ENSMUSG00000015143	Actn1	actinin, alpha 1	109711	0	chr12:80273156-80273556	Tet_TH0	Open
Iqsec2	4.09541e-16	3.8113e-15	7.17886																										Tet_TH0
Dgki	1.21982e-13	9.7628e-13	18.8341	chr6	37370573	37370973	401	*	3.61672	4.13356	2.38421	1.31242	0.00107727	0.0079988	Intron (ENSMUST00000041093.5/208647, intron 2 of 11)	6	36846022	37300184	454163	2	320127	-70389	ENSMUSG00000038665	Dgki	diacylglycerol kinase, iota	208647	0	chr6:37370573-37370973	Tet_TH0	Closed
Socs2	3.41075e-42	9.51388e-41	9.44915																										Tet_TH0
A630033H20Rik	7.22442e-15	6.21852e-14	-4.31152																										Tet_TH0
Gm36931	6.75805e-28	1.13932e-26	-21.4287																										Tet_TH0
Gm15428	4.39662e-08	2.20075e-07	11.2644																										Tet_TH0
AL591207.1	4.90343e-15	4.28106e-14	26.3452																										Tet_TH0
Ankrd29	1.41021e-24	2.06682e-23	17.475																										Tet_TH0
Dmpk	1.45992e-09	8.43946e-09	11.9339																										Tet_TH0
Efnb2	2.34122e-35	5.20765e-34	13.6231																										Tet_TH0
Ticrr	3.62433e-16	3.38963e-15	4.82835																										Tet_TH0
Nlrp10	6.27792e-14	5.1233e-13	-11.95																										Tet_TH0
Mir22hg	2.78513e-28	4.76503e-27	16.9191																										Tet_TH0
Krt17	3.65658e-11	2.40828e-10	17.1657																										Tet_TH0
Slc35e4	1.67645e-29	3.03855e-28	11.1757																										Tet_TH0
Tgtp1	3.90982e-13	3.02425e-12	-6.32604																										Tet_TH0
Gm7278	2.48511e-29	4.46911e-28	6.10245																										Tet_TH0
Il1rn	0.000364137	0.0011123	5.23911																										Tet_TH0
Ifi202b	3.30326e-45	1.01259e-43	229.112																										Tet_TH0
Ccna2	1.39567e-08	7.36817e-08	9.38185																										Tet_TH0
Smpdl3b	2.04147e-33	4.23242e-32	31.2613																										Tet_TH0
Sort1	2.5229e-06	1.04195e-05	4.32726																										Tet_TH0
Gabrr2	2.49879e-18	2.67858e-17	-5.58314	chr4	33077734	33078134	401	*	5.32393	3.71456	6.24715	-2.27178	1.3487e-12	2.71787e-10	Intron (ENSMUST00000108162.7/14409, intron 3 of 8)	4	33062999	33095865	32867	1	14409	14735	ENSMUSG00000023267	Gabrr2	gamma-aminobutyric acid (GABA) C receptor, subunit rho 2	100504166;56228;14409	0;0;0	chr4:33077734-33078134	Tet_TH0	Open
Gabrr2	2.49879e-18	2.67858e-17	-5.58314	chr4	33072817	33073217	401	*	5.52285	4.23579	6.36035	-1.88088	1.53455e-08	6.98773e-07	Intron (ENSMUST00000108162.7/14409, intron 2 of 8)	4	33062999	33095865	32867	1	14409	9818	ENSMUSG00000023267	Gabrr2	gamma-aminobutyric acid (GABA) C receptor, subunit rho 2	100504166;56228;14409	0;0;0	chr4:33072817-33073217	Tet_TH0	Open
Gabrr2	2.49879e-18	2.67858e-17	-5.58314	chr4	33077167	33077567	401	*	4.68345	3.53175	5.47689	-1.79165	1.98953e-08	8.59241e-07	Exon (ENSMUST00000108162.7/14409, exon 3 of 9)	4	33062999	33095865	32867	1	14409	14168	ENSMUSG00000023267	Gabrr2	gamma-aminobutyric acid (GABA) C receptor, subunit rho 2	100504166;56228;14409	0;0;0	chr4:33077167-33077567	Tet_TH0	Open
Cxcr2	9.91148e-36	2.24556e-34	-17.4586	chr1	74153366	74153766	401	*	4.43005	3.16228	5.2616	-1.79843	5.21933e-07	1.33804e-05	Promoter (<=1kb)	1	74153989	74161246	7258	1	12765	-223	ENSMUSG00000026180	Cxcr2	chemokine (C-X-C motif) receptor 2	21961;435626;12765;227288	0;27825;-223;40865	chr1:74153366-74153766	Tet_TH0	Open
Klk1b27	6.72412e-25	1.00248e-23	25.8764																										Tet_TH0
Slc12a8	6.97506e-15	6.01385e-14	11.0498																										Tet_TH0
Gm19261	1.02743e-16	9.93583e-16	-8.76889																										Tet_TH0
Sdc4	4.08174e-11	2.67641e-10	4.48448																										Tet_TH0
Sema7a	2.9826e-15	2.62836e-14	5.30084	chr9	57956847	57957247	401	*	4.92062	4.10048	5.57886	-1.27219	7.73651e-05	0.000902109	Intron (ENSMUST00000043059.8/20361, intron 8 of 13)	9	57940112	57962865	22754	1	20361	16735	ENSMUSG00000038264	Sema7a	sema domain, immunoglobulin domain (Ig), and GPI membrane anchor, (semaphorin) 7A	69459;20361;13070	0;0;0	chr9:57956847-57957247	Tet_TH0	Open
Kcnmb4	3.97765e-34	8.43188e-33	-5.09862																										Tet_TH0
Klf12	5.21411e-19	5.8491e-18	10.7138																										Tet_TH0
Pdzrn3	5.84178e-44	1.72699e-42	66.9915	chr6	101359649	101360049	401	*	5.17991	4.3471	5.84417	-1.2695	0.000170235	0.00172226	Intron (ENSMUST00000075994.10/55983, intron 2 of 9)	6	101149609	101377897	228289	2	55983	17848	ENSMUSG00000035357	Pdzrn3	PDZ domain containing RING finger 3	55983	0	chr6:101359649-101360049	Tet_TH0	Open
Cacna1s	2.91698e-24	4.20098e-23	60.3994																										Tet_TH0
Ccr3	3.69777e-11	2.43387e-10	7.79868																										Tet_TH0
Hspa2	7.58221e-29	1.32788e-27	13.1953																										Tet_TH0
2900005J15Rik	4.896e-17	4.84072e-16	-5.55221																										Tet_TH0
Aph1b	2.00448e-24	2.91923e-23	6.77514																										Tet_TH0
Cc2d2a	3.0581e-09	1.72131e-08	12.9996	chr5	43728766	43729166	401	*	3.09274	3.68314	1.47471	1.58333	0.000758106	0.00597354	Intron (ENSMUST00000048150.14/231214, intron 32 of 39)	5	43662346	43740972	78627	1	231214	66420	ENSMUSG00000039765	Cc2d2a	coiled-coil and C2 domain containing 2A	231214;242960	0;0	chr5:43728766-43729166	Tet_TH0	Closed
Cd109	1.12727e-23	1.57855e-22	58.0528																										Tet_TH0
Wnt3	3.27427e-74	1.82174e-72	49.5622																										Tet_TH0
Npnt	5.51442e-13	4.21513e-12	17.9871																										Tet_TH0
Aspm	1.45355e-06	6.19034e-06	4.41317																										Tet_TH0
Fgd1	3.44789e-13	2.67292e-12	16.6559																										Tet_TH0
Cnr2	1.27534e-58	5.21007e-57	-12.5408																										Tet_TH0
Gm2762	0.00112075	0.00316276	4.59377																										Tet_TH0
Ppp1r3f	7.15527e-27	1.16101e-25	-4.32133																										Tet_TH0
Ctdspl	5.76083e-12	4.05957e-11	4.20708	chr9	118884474	118884874	401	*	5.68354	4.82258	6.36092	-1.38466	3.35106e-06	6.43743e-05	Intron (ENSMUST00000044165.13/104099, intron 26 of 27)	9	118926453	119043998	117546	1	69274	-41579	ENSMUSG00000047409	Ctdspl	CTD (carboxy-terminal domain, RNA polymerase II, polypeptide A) small phosphatase-like	104099;69274	0;-41579	chr9:118884474-118884874	Tet_TH0	Open
Diaph3	6.02934e-20	7.06134e-19	8.40856	chr14	86736651	86737051	401	*	5.15065	3.86723	5.98704	-1.8413	3.12773e-08	1.26157e-06	Intron (ENSMUST00000022599.13/56419, intron 27 of 27)	14	86655367	87141235	485869	2	56419	404184	ENSMUSG00000022021	Diaph3	diaphanous related formin 3	56419	0	chr14:86736651-86737051	Tet_TH0	Open
Diaph3	6.02934e-20	7.06134e-19	8.40856	chr14	86847297	86847697	401	*	3.97663	2.55367	4.85325	-1.93444	4.46403e-07	1.17108e-05	Intron (ENSMUST00000022599.13/56419, intron 22 of 27)	14	86655367	87141235	485869	2	56419	293538	ENSMUSG00000022021	Diaph3	diaphanous related formin 3	56419	0	chr14:86847297-86847697	Tet_TH0	Open
Diaph3	6.02934e-20	7.06134e-19	8.40856	chr14	86744064	86744464	401	*	3.62691	2.76234	4.30593	-1.23956	0.00109072	0.008082	Intron (ENSMUST00000022599.13/56419, intron 27 of 27)	14	86655367	87141235	485869	2	56419	396771	ENSMUSG00000022021	Diaph3	diaphanous related formin 3	56419	0	chr14:86744064-86744464	Tet_TH0	Open
Irak1bp1	1.81456e-17	1.84145e-16	13.2667																										Tet_TH0
Fut7	3.01142e-18	3.21812e-17	9.83501																										Tet_TH0
Ccdc141	1.18328e-41	3.23967e-40	4.86692																										Tet_TH0
Gm17709	3.92176e-17	3.89604e-16	4.03127																										Tet_TH0
Zfp316	4.01437e-28	6.80083e-27	4.29739																										Tet_TH0
Tyrobp	1.37551e-09	7.97024e-09	5.91134																										Tet_TH0
Gucy2g	4.42678e-23	6.00844e-22	51.2226																										Tet_TH0
Fbxo41	3.17664e-06	1.29442e-05	5.91664																										Tet_TH0
Gfra2	7.48966e-08	3.66241e-07	7.98676																										Tet_TH0
Lyplal1	1.00501e-19	1.16715e-18	5.90168																										Tet_TH0
Pdzk1ip1	2.10293e-33	4.3555e-32	108.033																										Tet_TH0
Tmigd1	6.69788e-14	5.4553e-13	23.0837																										Tet_TH0
Gm20658	0.000904041	0.00258887	4.63275																										Tet_TH0
Nlrp1b	1.34119e-10	8.43702e-10	7.95954																										Tet_TH0
Mettl27	1.52655e-19	1.75905e-18	-6.40474	chr5	134939076	134939476	401	*	4.25294	3.22355	5.0015	-1.5766	4.78528e-06	8.67444e-05	Intron (ENSMUST00000047196.13/79565, intron 5 of 5)	5	134932368	134942637	10270	1	79565	6708	ENSMUSG00000040557	Mettl27	methyltransferase like 27	76629;57255;79565;12740;12739;71304	-32343;-23550;0;7458;-46738;61874	chr5:134939076-134939476	Tet_TH0	Open
Mettl27	1.52655e-19	1.75905e-18	-6.40474	chr5	134933294	134933694	401	*	4.70206	3.89417	5.3544	-1.26803	9.58034e-05	0.001075	Promoter (<=1kb)	5	134932368	134942637	10270	1	79565	926	ENSMUSG00000040557	Mettl27	methyltransferase like 27	76629;57255;79565;12740	-26561;-17768;0;13240	chr5:134933294-134933694	Tet_TH0	Open
Siah3	7.3076e-16	6.69852e-15	20.8604																										Tet_TH0
Ccdc38	9.5238e-09	5.09926e-08	4.24746																										Tet_TH0
Gata1	1.05455e-12	7.88084e-12	-6.96384																										Tet_TH0
Zfp2	3.14596e-28	5.36026e-27	-12.0719	chr11	50915978	50916378	401	*	4.55137	3.54645	5.29029	-1.45505	4.20991e-05	0.000539057	Promoter (<=1kb)	11	50898712	50916165	17454	2	22678	0	ENSMUSG00000049321	Zfp2	zinc finger protein 2	108072;237758;22678;27274;19127	0;-28327;0;15255;0	chr11:50915978-50916378	Tet_TH0	Open
Gm42495	2.44118e-19	2.78056e-18	38.3015																										Tet_TH0
C1qtnf6	2.34911e-107	2.23629e-105	48.5877																										Tet_TH0
Lrrc3b	1.63318e-20	1.95464e-19	-44.6377	chr14	15746834	15747234	401	*	3.95159	2.77087	4.75495	-1.6184	2.01545e-05	0.00029003	Intron (ENSMUST00000225006.1/ENSMUST00000225006.1, intron 3 of 3)	14	15357515	15438987	81473	2	218763	-307847	ENSMUSG00000045201	Lrrc3b	leucine rich repeat containing 3B			chr14:15746834-15747234	Tet_TH0	Open
Ell2	5.92946e-45	1.80431e-43	4.41528																										Tet_TH0
Gm38329	6.15127e-20	7.20008e-19	6.94339																										Tet_TH0
Cd5l	1.30513e-07	6.22793e-07	4.95928																										Tet_TH0
Hsf4	2.94451e-11	1.95794e-10	4.76135																										Tet_TH0
Kcnc2	7.27129e-33	1.47797e-31	60.9318																										Tet_TH0
Tubb6	1.34978e-08	7.13497e-08	8.7981																										Tet_TH0
Sh2b2	1.66045e-17	1.69084e-16	20.6308																										Tet_TH0
Dbh	5.82391e-11	3.76757e-10	16.3854																										Tet_TH0
Stra6	2.79057e-10	1.71187e-09	-9.2454																										Tet_TH0
Arhgap31	3.4065e-76	1.95831e-74	4.31735																										Tet_TH0
Capn5	1.72717e-11	1.16964e-10	5.37074																										Tet_TH0
Plppr2	3.12407e-24	4.48988e-23	7.1555																										Tet_TH0
Pex11g	8.53112e-15	7.30993e-14	4.6056																										Tet_TH0
Hes5	1.13616e-22	1.50183e-21	6.00771																										Tet_TH0
Treml4	2.46186e-07	1.14221e-06	6.23698																										Tet_TH0
March3	3.45708e-29	6.16365e-28	4.88423																										Tet_TH0
Gm44756	2.0175e-13	1.58535e-12	22.1288																										Tet_TH0
Gm6934	1.95437e-28	3.36031e-27	-41.7048																										Tet_TH0
B3galt1	1.23596e-14	1.04608e-13	25.6779																										Tet_TH0
Cdh23	1.26997e-12	9.41946e-12	14.3569																										Tet_TH0
Dclk1	1.04002e-12	7.77788e-12	20.65	chr3	55419335	55419735	401	*	4.27224	3.29885	4.99842	-1.46352	1.45124e-05	0.000219539	Intron (ENSMUST00000196745.4/13175, intron 4 of 16)	3	55242364	55539068	296705	1	13175	176971	ENSMUSG00000027797	Dclk1	doublecortin-like kinase 1	13175	0	chr3:55419335-55419735	Tet_TH0	Open
Slc15a3	1.23011e-10	7.75703e-10	6.32314																										Tet_TH0
Gm37261	1.03089e-42	2.93471e-41	-8.04246																										Tet_TH0
Hmgn3	1.40339e-15	1.26573e-14	29.4275																										Tet_TH0
Areg	7.01177e-18	7.34554e-17	37.1824																										Tet_TH0
Lacc1	5.04995e-07	2.2538e-06	6.47375																										Tet_TH0
Gm6831	1.17898e-34	2.55666e-33	122.544																										Tet_TH0
Ociad2	3.88409e-39	9.81809e-38	71.7454																										Tet_TH0
Ckap2l	1.70504e-07	8.03103e-07	4.05872																										Tet_TH0
Reep2	3.36419e-18	3.58587e-17	9.44655	chr18	34827658	34828058	401	*	4.16402	3.32167	4.83277	-1.25234	0.000369803	0.0032962	Intron (ENSMUST00000043775.8/277250, intron 16 of 23)	18	34840589	34847463	6875	1	225362	-12531	ENSMUSG00000038555	Reep2	receptor accessory protein 2	277250;225362;13653	0;0;0	chr18:34827658-34828058	Tet_TH0	Open
Pgam2	1.74345e-12	1.27851e-11	22.044																										Tet_TH0
Ifng	1.21321e-59	5.11744e-58	246.447	chr10	118470626	118471026	401	*	3.39221	4.02585	1.47471	1.9	5.39712e-05	0.000665749	Distal Intergenic	10	118441046	118445892	4847	1	15978	29580	ENSMUSG00000055170	Ifng	interferon gamma	15978;103214	29580;85499	chr10:118470626-118471026	Tet_TH0	Closed
Ifng	1.21321e-59	5.11744e-58	246.447	chr10	118495326	118495726	401	*	2.98728	3.55909	1.47879	1.61144	0.000629953	0.00511849	Distal Intergenic	10	118441046	118445892	4847	1	15978	54280	ENSMUSG00000055170	Ifng	interferon gamma	15978;103214	54280;60799	chr10:118495326-118495726	Tet_TH0	Closed
Pard6g	5.75441e-36	1.31521e-34	-9.55465	chr18	80041798	80042198	401	*	4.6557	3.81361	5.32432	-1.28668	0.000140766	0.00147518	Distal Intergenic	18	80046890	80119639	72750	1	93737	-4692	ENSMUSG00000056214	Pard6g	par-6 family cell polarity regulator gamma	102640717;93737	22244;0	chr18:80041798-80042198	Tet_TH0	Open
Spib	5.04554e-07	2.25232e-06	4.80423																										Tet_TH0
Penk	7.78674e-14	6.30997e-13	25.392																										Tet_TH0
AC115037.1	1.39562e-07	6.63232e-07	10.23																										Tet_TH0
Gm20045	7.1134e-38	1.71258e-36	-13.7696																										Tet_TH0
Dock7	7.98937e-18	8.33183e-17	35.2427																										Tet_TH0
Map1b	2.13416e-08	1.10312e-07	7.7218	chr13	99696132	99696532	401	*	3.44393	3.96223	2.20485	1.31936	0.00141287	0.00999216	Distal Intergenic	13	99421446	99516540	95095	2	17755	-179592	ENSMUSG00000052727	Map1b	microtubule-associated protein 1B			chr13:99696132-99696532	Tet_TH0	Closed
Pcsk4	3.40974e-16	3.19469e-15	-8.59615																										Tet_TH0
Gm11674	3.38306e-09	1.89293e-08	6.0563																										Tet_TH0
Cd19	3.52553e-05	0.000125005	6.69498																										Tet_TH0
Pld1	1.99238e-06	8.3245e-06	5.26586	chr3	27983895	27984295	401	*	4.24044	3.31566	4.94618	-1.37128	6.26497e-05	0.000753701	5' UTR	3	27938695	28133362	194668	1	18805	45200	ENSMUSG00000027695	Pld1	phospholipase D1	18805	0	chr3:27983895-27984295	Tet_TH0	Open
Papln	5.98439e-08	2.95349e-07	10.9725																										Tet_TH0
Alpk2	2.60581e-16	2.45923e-15	17.2134	chr18	65327099	65327499	401	*	4.15075	4.81138	2.00281	2.21815	1.05643e-06	2.41687e-05	Intron (ENSMUST00000035548.15/225638, intron 4 of 12)	18	65265529	65394066	128538	2	225638	66567	ENSMUSG00000032845	Alpk2	alpha-kinase 2	225638	0	chr18:65327099-65327499	Tet_TH0	Closed
Gm5530	2.09646e-32	4.19556e-31	100.799																										Tet_TH0
Tg	2.99148e-07	1.3735e-06	7.74826	chr15	66702753	66703153	401	*	3.45483	4.22447	0	1.94198	0.000205875	0.00201835	Intron (ENSMUST00000065916.13/21819, intron 20 of 47)	15	66670753	66850721	179969	1	21819	32000	ENSMUSG00000053469	Tg	thyroglobulin	21819	0	chr15:66702753-66703153	Tet_TH0	Closed
Fgf18	9.87778e-08	4.77729e-07	10.5295																										Tet_TH0
Rasgef1b	6.41916e-24	9.14323e-23	15.2894																										Tet_TH0
AA414768	9.73235e-17	9.42489e-16	4.6808																										Tet_TH0
Fam217b	5.00267e-25	7.49064e-24	70.4356																										Tet_TH0
D630003M21Rik	2.90493e-05	0.000104139	6.88828																										Tet_TH0
Gm3667	1.40285e-12	1.03754e-11	15.0578																										Tet_TH0
E130215H24Rik	4.4747e-10	2.6917e-09	-4.15629	chr2	150667157	150667557	401	*	5.65497	4.85032	6.30573	-1.27942	7.17281e-05	0.000845028	Promoter (<=1kb)	2	150667494	150668935	1442	1	109344	0	ENSMUSG00000087406	E130215H24Rik	RIKEN cDNA E130215H24 gene	68738;109344;114889	0;0;21803	chr2:150667157-150667557	Tet_TH0	Open
E130215H24Rik	4.4747e-10	2.6917e-09	-4.15629	chr2	150657196	150657596	401	*	3.32764	2.11439	4.14179	-1.62737	8.6799e-05	0.000990625	Intron (ENSMUST00000028944.3/68738, intron 2 of 13)	2	150667494	150668935	1442	1	109344	-9898	ENSMUSG00000087406	E130215H24Rik	RIKEN cDNA E130215H24 gene	71881;68738;109344;114889	0;0;0;31764	chr2:150657196-150657596	Tet_TH0	Open
Ncmap	2.87549e-37	6.82001e-36	8.07003																										Tet_TH0
Pif1	1.3527e-06	5.78101e-06	8.31378																										Tet_TH0
5330417C22Rik	4.98932e-07	2.22865e-06	4.6645																										Tet_TH0
Gm3411	5.00036e-09	2.74676e-08	5.30921																										Tet_TH0
Stx1a	8.8623e-26	1.37458e-24	-5.84752																										Tet_TH0
Asphd2	1.57791e-08	8.28393e-08	11.933																										Tet_TH0
Il12rb2	4.58989e-09	2.53066e-08	5.79876	chr6	67339482	67339882	401	*	4.25991	2.73158	5.1638	-2.00419	2.79182e-07	7.8913e-06	5' UTR	6	67291318	67376188	84871	2	16162	36306	ENSMUSG00000018341	Il12rb2	interleukin 12 receptor, beta 2	66870;16162	0;0	chr6:67339482-67339882	Tet_TH0	Open
Il12rb2	4.58989e-09	2.53066e-08	5.79876	chr6	67348050	67348450	401	*	5.47154	4.61224	6.14815	-1.32606	8.55237e-05	0.000977309	Intron (ENSMUST00000018485.3/16162, intron 7 of 15)	6	67291318	67376188	84871	2	16162	27738	ENSMUSG00000018341	Il12rb2	interleukin 12 receptor, beta 2	16162	0	chr6:67348050-67348450	Tet_TH0	Open
Lpar3	2.17393e-43	6.34538e-42	213.674	chr3	146220719	146221119	401	*	4.49327	5.13354	2.52281	2.20207	4.21854e-08	1.61646e-06	Promoter (<=1kb)	3	146220963	146286186	65224	1	65086	0	ENSMUSG00000036832	Lpar3	lysophosphatidic acid receptor 3	68279;65086	0;0	chr3:146220719-146221119	Tet_TH0	Closed
Lpar3	2.17393e-43	6.34538e-42	213.674	chr3	146185992	146186392	401	*	3.519	4.09167	2.00564	1.73599	0.000119926	0.00129391	Intron (ENSMUST00000011152.13/68279, intron 11 of 13)	3	146220963	146286186	65224	1	65086	-34571	ENSMUSG00000036832	Lpar3	lysophosphatidic acid receptor 3	171166;68279;65086	0;0;0	chr3:146185992-146186392	Tet_TH0	Closed
Erdr1	1.15962e-52	4.17806e-51	-6.93838																										Tet_TH0
Ephb2	1.23568e-11	8.48861e-11	16.4333																										Tet_TH0
Tgfbi	5.18034e-09	2.84186e-08	4.27059																										Tet_TH0
Acta2	9.27525e-15	7.92463e-14	26.3273																										Tet_TH0
Gm4841	3.73071e-38	9.16253e-37	9.75018																										Tet_TH0
Nectin1	4.25935e-31	8.16952e-30	35.9737																										Tet_TH0
Tle1	2.42432e-33	4.99622e-32	-21.3376	chr4	72200874	72201274	401	*	6.75884	5.48305	7.59288	-1.84372	2.88821e-07	8.11469e-06	Promoter (<=1kb)	4	72117142	72200919	83778	2	21885	0	ENSMUSG00000008305	Tle1	transducin-like enhancer of split 1	21885	0	chr4:72200874-72201274	Tet_TH0	Open
Lgals3	1.25897e-05	4.76691e-05	5.3641																										Tet_TH0
Lrrk2	6.51192e-07	2.8723e-06	5.24508																										Tet_TH0
Tgfb3	7.28061e-07	3.19641e-06	5.02199	chr12	86046156	86046556	401	*	4.47819	2.78218	5.42066	-2.30837	7.69035e-11	8.47091e-09	Intron (ENSMUST00000040179.13/320244, intron 33 of 33)	12	86056745	86079041	22297	2	21809	32485	ENSMUSG00000021253	Tgfb3	transforming growth factor, beta 3	320244;21809;76411	0;32485;-35985	chr12:86046156-86046556	Tet_TH0	Open
Tgfb3	7.28061e-07	3.19641e-06	5.02199	chr12	86047383	86047783	401	*	4.32797	2.5793	5.28147	-2.36538	1.16245e-10	1.21013e-08	Intron (ENSMUST00000040179.13/320244, intron 33 of 33)	12	86056745	86079041	22297	2	21809	31258	ENSMUSG00000021253	Tgfb3	transforming growth factor, beta 3	320244;21809;76411	0;31258;-34758	chr12:86047383-86047783	Tet_TH0	Open
Tgfb3	7.28061e-07	3.19641e-06	5.02199	chr12	85969565	85969965	401	*	5.45662	4.59254	6.13542	-1.37904	6.70054e-06	0.000115092	Intron (ENSMUST00000040179.13/320244, intron 29 of 33)	12	86056745	86079041	22297	2	21809	109076	ENSMUSG00000021253	Tgfb3	transforming growth factor, beta 3	320244	0	chr12:85969565-85969965	Tet_TH0	Open
Tgfb3	7.28061e-07	3.19641e-06	5.02199	chr12	85973568	85973968	401	*	4.47582	3.45651	5.22044	-1.50727	8.27376e-06	0.000137333	Intron (ENSMUST00000040179.13/320244, intron 29 of 33)	12	86056745	86079041	22297	2	21809	105073	ENSMUSG00000021253	Tgfb3	transforming growth factor, beta 3	320244	0	chr12:85973568-85973968	Tet_TH0	Open
Tgfb3	7.28061e-07	3.19641e-06	5.02199	chr12	85963709	85964109	401	*	4.07804	3.102	4.80531	-1.45056	2.24266e-05	0.00031815	Exon (ENSMUST00000181727.2/ENSMUST00000181727.2, exon 2 of 2)	12	86056745	86079041	22297	2	21809	114932	ENSMUSG00000021253	Tgfb3	transforming growth factor, beta 3	320244	0	chr12:85963709-85964109	Tet_TH0	Open
Tgfb3	7.28061e-07	3.19641e-06	5.02199	chr12	86034010	86034410	401	*	3.59375	2.42397	4.3934	-1.60247	7.26045e-05	0.000853784	Intron (ENSMUST00000040179.13/320244, intron 33 of 33)	12	86056745	86079041	22297	2	21809	44631	ENSMUSG00000021253	Tgfb3	transforming growth factor, beta 3	320244;21809;76411	0;44631;-48131	chr12:86034010-86034410	Tet_TH0	Open
Gm3002	1.63453e-06	6.91849e-06	9.30891																										Tet_TH0
G430095P16Rik	2.11075e-08	1.09156e-07	-4.13199																										Tet_TH0
Ccr8	2.80969e-06	1.15419e-05	5.54789																										Tet_TH0
Npdc1	4.60258e-13	3.53899e-12	6.43461																										Tet_TH0
Tmed1	1.53876e-25	2.36198e-24	10.9552																										Tet_TH0
Fhl2	1.22985e-17	1.26227e-16	10.2075																										Tet_TH0
2600014E21Rik	2.68725e-16	2.53494e-15	-48.839																										Tet_TH0
Tenm4	1.19406e-11	8.21898e-11	13.0242																										Tet_TH0
Marveld2	1.02989e-16	9.95497e-16	7.55286																										Tet_TH0
4833407H14Rik	7.13536e-10	4.2357e-09	13.1968																										Tet_TH0
Bmp1	3.01619e-11	2.00304e-10	9.40211																										Tet_TH0
Pld2	1.55292e-56	6.00144e-55	5.50857																										Tet_TH0
Klrb1a	2.4291e-08	1.24816e-07	8.50938																										Tet_TH0
Stab2	2.13084e-07	9.93515e-07	6.2468																										Tet_TH0
Hpgd	4.48373e-07	2.01549e-06	6.12603																										Tet_TH0
Masp2	7.50877e-21	9.16105e-20	-10.3342																										Tet_TH0
Phlda3	4.43329e-21	5.46992e-20	6.58114																										Tet_TH0
Pbk	1.8048e-07	8.46823e-07	8.41021																										Tet_TH0
Usp18	3.42467e-41	9.18244e-40	-7.66672																										Tet_TH0
St3gal6	5.6268e-19	6.29844e-18	-4.75606	chr16	58498398	58498798	401	*	4.24916	3.45247	4.89603	-1.30419	5.55632e-05	0.000682116	Intron (ENSMUST00000137035.7/54613, intron 2 of 10)	16	58468125	58524243	56119	2	54613	25445	ENSMUSG00000022747	St3gal6	ST3 beta-galactoside alpha-2,3-sialyltransferase 6	73379;54613	0;0	chr16:58498398-58498798	Tet_TH0	Open
Neo1	6.84144e-05	0.000232946	5.96526																										Tet_TH0
Gm21986	3.99534e-21	4.94722e-20	-5.90743																										Tet_TH0
F830016B08Rik	6.20039e-26	9.70412e-25	74.6975																										Tet_TH0
AW112010	6.57969e-110	6.47149e-108	7.29891																										Tet_TH0
Gm31135	9.35644e-16	8.50522e-15	25.227																										Tet_TH0
Mageh1	1.50738e-21	1.90631e-20	9.56455																										Tet_TH0
Snx21	9.86045e-17	9.54004e-16	17.2247																										Tet_TH0
Serpina3f	2.00395e-35	4.46222e-34	86.8331																										Tet_TH0
Atp6v1g3	7.66064e-13	5.78745e-12	19.4181	chr1	138287663	138288063	401	*	3.1362	3.71401	1.59338	1.61696	0.000476994	0.00406455	3' UTR	1	138273738	138289462	15725	1	338375	13925	ENSMUSG00000026394	Atp6v1g3	ATPase, H+ transporting, lysosomal V1 subunit G3	338375	0	chr1:138287663-138288063	Tet_TH0	Closed
Atp6v1g3	7.66064e-13	5.78745e-12	19.4181	chr1	138291458	138291858	401	*	3.23711	3.7457	2.04101	1.41664	0.00118882	0.00866691	Distal Intergenic	1	138273738	138289462	15725	1	338375	17720	ENSMUSG00000026394	Atp6v1g3	ATPase, H+ transporting, lysosomal V1 subunit G3	338375	0	chr1:138291458-138291858	Tet_TH0	Closed
Atp6v1g3	7.66064e-13	5.78745e-12	19.4181	chr1	138233035	138233435	401	*	4.35964	3.41765	5.07272	-1.41567	4.17221e-05	0.000535181	Distal Intergenic	1	138273738	138289462	15725	1	338375	-40303	ENSMUSG00000026394	Atp6v1g3	ATPase, H+ transporting, lysosomal V1 subunit G3	338375	0	chr1:138233035-138233435	Tet_TH0	Open
Krt87	4.98447e-07	2.22697e-06	9.73391																										Tet_TH0
Cebpd	2.95423e-14	2.45138e-13	9.73093																										Tet_TH0
Slc23a3	2.35016e-07	1.09185e-06	-5.15111																										Tet_TH0
Gm29094	6.49172e-17	6.35184e-16	11.3411																										Tet_TH0
Gm32633	3.58463e-17	3.57138e-16	-5.80534																										Tet_TH0
Gm38405	1.07317e-11	7.40898e-11	-19.9482																										Tet_TH0
CT030166.5	5.35816e-06	2.12453e-05	5.44086																										Tet_TH0
AC153498.1	2.43086e-40	6.3297e-39	196.118																										Tet_TH0
Sapcd2	4.8617e-07	2.17586e-06	9.72102																										Tet_TH0
Gm20544	8.76979e-13	6.5918e-12	-14.6048																										Tet_TH0
Col23a1	1.63508e-09	9.4153e-09	-4.56061																										Tet_TH0
Fam131a	6.88026e-15	5.93458e-14	5.48749																										Tet_TH0
Ptgs1	4.19533e-10	2.53172e-09	13.4812																										Tet_TH0
Depdc1a	8.2969e-06	3.21602e-05	6.35577																										Tet_TH0
Grk3	3.12023e-10	1.90621e-09	5.95725																										Tet_TH0
Dusp9	1.35732e-11	9.29644e-11	13.594																										Tet_TH0
Spint1	2.04409e-11	1.37641e-10	18.9782																										Tet_TH0
Cdkn2b	6.5186e-32	1.27985e-30	44.611																										Tet_TH0
Rubcnl	5.21356e-09	2.85933e-08	5.10749	chr14	75034108	75034508	401	*	4.33259	3.54603	4.97447	-1.20448	0.00026023	0.00245373	Intron (ENSMUST00000036072.7/271221, intron 2 of 13)	14	75016027	75052532	36506	1	271221	18081	ENSMUSG00000034959	Rubcnl	RUN and cysteine rich domain containing beclin 1 interacting protein like	100043169;271221;70859	59022;0;0	chr14:75034108-75034508	Tet_TH0	Open
Rab3il1	1.31743e-06	5.63607e-06	5.70497																										Tet_TH0
Siglec1	6.80453e-05	0.000231841	5.46415																										Tet_TH0
Vsig10l	2.59679e-13	2.02751e-12	6.06105																										Tet_TH0
Lyl1	1.72299e-05	6.39434e-05	4.2338																										Tet_TH0
Gna15	5.29627e-23	7.14638e-22	13.5182																										Tet_TH0
Gm37240	1.92434e-11	1.29915e-10	7.67171																										Tet_TH0
Bank1	8.25177e-10	4.86641e-09	5.77448																										Tet_TH0
Myo7a	3.12761e-19	3.54491e-18	6.7453																										Tet_TH0
Rgl1	1.37721e-06	5.87851e-06	4.50532																										Tet_TH0
Rgs1	4.37435e-260	2.26952e-257	34.2164	chr1	144272978	144273378	401	*	4.95432	4.12041	5.6191	-1.27302	0.000200336	0.00197156	Distal Intergenic	1	144242296	144249242	6947	2	50778	-23736	ENSMUSG00000026358	Rgs1	regulator of G-protein signaling 1	50778	0	chr1:144272978-144273378	Tet_TH0	Open
Cyp2u1	5.07899e-10	3.04022e-09	4.60237																										Tet_TH0
Ccrl2	2.20376e-36	5.12147e-35	36.6262																										Tet_TH0
Blk	2.89441e-10	1.77348e-09	14.7613																										Tet_TH0
Gm10505	2.16341e-29	3.90072e-28	5.82947																										Tet_TH0
Sept5	4.54946e-09	2.50903e-08	9.45999																										Tet_TH0
Rnf39	1.53777e-14	1.29361e-13	26.8167																										Tet_TH0
Plbd1	1.51762e-08	7.9856e-08	7.08723																										Tet_TH0
Gm11025	2.91371e-07	1.33927e-06	-4.53794																										Tet_TH0
Rundc3a	4.52037e-26	7.1123e-25	4.52692																										Tet_TH0
Cenpf	5.59956e-06	2.21559e-05	7.72761	chr1	189608691	189609091	401	*	3.97921	3.06698	4.67952	-1.42838	4.31931e-05	0.000550911	Distal Intergenic	1	189640606	189688086	47481	2	108000	78995	ENSMUSG00000026605	Cenpf	centromere protein F	108000	0	chr1:189608691-189609091	Tet_TH0	Open
Usp27x	9.59904e-17	9.30013e-16	5.20571																										Tet_TH0
AC115304.1	1.52014e-14	1.27929e-13	24.1603																										Tet_TH0
Myo10	1.39746e-25	2.14825e-24	-16.1297	chr15	25695915	25696315	401	*	5.47664	2.42745	6.59584	-3.58091	4.0329e-20	2.42101e-16	Intron (ENSMUST00000110457.7/17909, intron 2 of 40)	15	25622525	25813673	191149	1	17909	73390	ENSMUSG00000022272	Myo10	myosin X	17909	0	chr15:25695915-25696315	Tet_TH0	Open
Myo10	1.39746e-25	2.14825e-24	-16.1297	chr15	25692582	25692982	401	*	5.13035	3.45011	6.06942	-2.33206	2.30007e-12	4.22685e-10	Intron (ENSMUST00000110457.7/17909, intron 2 of 40)	15	25622525	25813673	191149	1	17909	70057	ENSMUSG00000022272	Myo10	myosin X	17909	0	chr15:25692582-25692982	Tet_TH0	Open
Myo10	1.39746e-25	2.14825e-24	-16.1297	chr15	25707243	25707643	401	*	3.9274	2.91082	4.67095	-1.41701	0.000271665	0.0025396	Intron (ENSMUST00000110457.7/17909, intron 3 of 40)	15	25622525	25813673	191149	1	17909	84718	ENSMUSG00000022272	Myo10	myosin X	17909	0	chr15:25707243-25707643	Tet_TH0	Open
Gm7993	4.38712e-18	4.6452e-17	4.03045																										Tet_TH0
Sema3f	7.41843e-11	4.76788e-10	-10.8728	chr9	107719132	107719532	401	*	4.93413	3.12128	5.90043	-2.47902	8.2838e-14	2.68806e-11	Distal Intergenic	9	107681500	107710475	28976	2	20350	-8657	ENSMUSG00000034684	Sema3f	sema domain, immunoglobulin domain (Ig), short basic domain, secreted, (semaphorin) 3F	76257;14685;20350;83486	-49602;0;0;0	chr9:107719132-107719532	Tet_TH0	Open
Irf8	8.12565e-14	6.58081e-13	6.27727																										Tet_TH0
Heyl	4.69601e-06	1.87632e-05	8.43549																										Tet_TH0
Tubb2b	1.70972e-15	1.52939e-14	5.78145																										Tet_TH0
Icam5	1.05452e-12	7.88084e-12	4.98046																										Tet_TH0
Rassf6	0.000187649	0.000601153	5.93529																										Tet_TH0
Dusp18	5.93098e-06	2.33959e-05	6.89366																										Tet_TH0
Mex3a	1.01015e-28	1.75575e-27	-17.2725																										Tet_TH0
Enpp2	3.49359e-12	2.5044e-11	5.53182																										Tet_TH0
Samd14	8.31915e-09	4.48202e-08	11.8554																										Tet_TH0
Lilrb4a	8.65929e-21	1.054e-19	17.3628																										Tet_TH0
Msrb3	4.72193e-08	2.35676e-07	8.70566																										Tet_TH0
Fst	4.16093e-21	5.14612e-20	53.6																										Tet_TH0
Grik3	9.52973e-18	9.87865e-17	37.7434																										Tet_TH0
Melk	3.63666e-18	3.86637e-17	9.24253	chr4	44271078	44271478	401	*	5.52483	4.59745	6.23169	-1.42944	1.22366e-05	0.000190554	Distal Intergenic	4	44300876	44364675	63800	1	17279	-29398	ENSMUSG00000035683	Melk	maternal embryonic leucine zipper kinase	73469;100628618;17279	0;-49811;0	chr4:44271078-44271478	Tet_TH0	Open
Fbxo44	1.45306e-10	9.10105e-10	11.895																										Tet_TH0
Chrna1os	1.18439e-14	1.00366e-13	26.8241	chr2	73584587	73584987	401	*	3.78166	4.26446	2.69262	1.36078	0.000597368	0.00489905	Promoter (<=1kb)	2	73584850	73589208	4359	1	102633437	0	ENSMUSG00000086382	Chrna1os	cholinergic receptor, nicotinic, alpha polypeptide 1 (muscle), opposite strand	11435;102633437;329427;108699	0;0;0;0	chr2:73584587-73584987	Tet_TH0	Closed
Sh3tc1	1.37645e-09	7.97251e-09	9.09235																										Tet_TH0
Pusl1	1.59337e-20	1.9092e-19	-4.08632																										Tet_TH0
Tnfrsf4	4.33419e-31	8.30539e-30	11.8736	chr4	156008347	156008747	401	*	3.94165	4.53438	2.3092	1.58916	0.000925108	0.00705869	Exon (ENSMUST00000149971.1/20318, exon 1 of 3)	4	156013843	156016612	2770	1	22163	-5096	ENSMUSG00000029075	Tnfrsf4	tumor necrosis factor receptor superfamily, member 4	140499;67389;117592;20318;22163;100038526;21936;330010;100415901;723865;387242;387243	0;46029;0;0;0;0;0;0;51055;45240;46238;47003	chr4:156008347-156008747	Tet_TH0	Closed
Tnfrsf4	4.33419e-31	8.30539e-30	11.8736	chr4	156004089	156004489	401	*	4.81951	3.92965	5.50995	-1.36583	2.87527e-05	0.000392289	Intron (ENSMUST00000105579.7/20318, intron 5 of 7)	4	156013843	156016612	2770	1	22163	-9354	ENSMUSG00000029075	Tnfrsf4	tumor necrosis factor receptor superfamily, member 4	140499;67389;117592;20318;22163;100038526;21936;330010;100415901;723865	0;41771;0;0;0;0;0;0;55313;49498	chr4:156004089-156004489	Tet_TH0	Open
Pparg	2.58093e-06	1.06401e-05	5.95844																										Tet_TH0
Esco2	0.000313577	0.000969557	4.06993																										Tet_TH0
Zbtb32	6.70006e-60	2.84931e-58	481.885																										Tet_TH0
Frmpd4	2.73117e-08	1.39434e-07	12.1857																										Tet_TH0
Tns4	1.08888e-12	8.12275e-12	-30.3071	chr11	99115900	99116300	401	*	4.306	3.38534	5.00996	-1.40074	5.83778e-05	0.000709895	Distal Intergenic	11	99065678	99089306	23629	2	217169	-26594	ENSMUSG00000017607	Tns4	tensin 4	217169;12775	-26594;0	chr11:99115900-99116300	Tet_TH0	Open
Tns4	1.08888e-12	8.12275e-12	-30.3071	chr11	99105009	99105409	401	*	4.9765	4.36174	5.52504	-0.995288	0.000853733	0.00660294	Distal Intergenic	11	99065678	99089306	23629	2	217169	-15703	ENSMUSG00000017607	Tns4	tensin 4	217169;12775	-15703;0	chr11:99105009-99105409	Tet_TH0	Open
Trpm2	1.72982e-05	6.41627e-05	4.8246																										Tet_TH0
4930447K03Rik	3.29941e-07	1.50655e-06	4.36566																										Tet_TH0
S100a11	5.90196e-38	1.42921e-36	6.39798	chr3	93514592	93514992	401	*	4.33237	3.50127	4.99582	-1.2622	0.000246563	0.00234822	Distal Intergenic	3	93520488	93526287	5800	1	20195	-5496	ENSMUSG00000027907	S100a11	S100 calcium binding protein A11	71325;20195;20194	45838;0;0	chr3:93514592-93514992	Tet_TH0	Open
Gm36961	1.67466e-16	1.59569e-15	5.51872																										Tet_TH0
Tns2	8.54333e-12	5.94566e-11	12.0801																										Tet_TH0
Sema4c	1.79132e-33	3.72125e-32	68.1136																										Tet_TH0
Ticam2	1.53772e-09	8.86946e-09	11.3026																										Tet_TH0
Slpi	6.95286e-21	8.4978e-20	-7.57773																										Tet_TH0
Gm37909	4.48151e-05	0.000156785	-4.14623																										Tet_TH0
Phlda1	3.15675e-29	5.64273e-28	4.68027																										Tet_TH0
Gm9115	6.08934e-15	5.28091e-14	4.32733																										Tet_TH0
Pax9	3.47508e-27	5.70106e-26	77.5429																										Tet_TH0
Dync2li1	1.15223e-13	9.24678e-13	6.2186																										Tet_TH0
Gm43196	5.83112e-20	6.84078e-19	-6.29511																										Tet_TH0
Cyp2s1	4.21973e-09	2.33588e-08	-5.69067																										Tet_TH0
Gpr183	2.33639e-79	1.41775e-77	4.09687	chr14	121958660	121959060	401	*	4.49907	3.88879	5.04494	-0.987019	0.00128637	0.00926119	Intron (ENSMUST00000039803.6/68889, intron 4 of 8)	14	121952551	121965195	12645	2	321019	6135	ENSMUSG00000051212	Gpr183	G protein-coupled receptor 183	68889;110168;321019	0;0;0	chr14:121958660-121959060	Tet_TH0	Open
Zscan30	2.32877e-05	8.47876e-05	-4.53496	chr18	23986885	23987285	401	*	4.38528	3.43815	5.10054	-1.4445	1.585e-05	0.000236791	Promoter (<=1kb)	18	23964818	23987226	22409	2	328918	0		Zscan30	zinc finger and SCAN domain containing 30	69256;328918;22694;59057	0;0;0;0	chr18:23986885-23987285	Tet_TH0	Open
Plpp1	5.67544e-08	2.81238e-07	6.23941																										Tet_TH0
Acvr1	7.56479e-18	7.89698e-17	8.50404																										Tet_TH0
Gpr162	9.79666e-24	1.38118e-22	6.71454																										Tet_TH0
Gm9260	3.39522e-12	2.43641e-11	6.89935																										Tet_TH0
Adamdec1	1.53453e-06	6.52185e-06	6.51377																										Tet_TH0
Bcas1	1.54955e-11	1.05332e-10	6.42869																										Tet_TH0
Gm14032	9.40989e-13	7.06525e-12	6.49567																										Tet_TH0
Tns3	3.73422e-06	1.50859e-05	4.09914																										Tet_TH0
Igkv3-4	2.67854e-10	1.64607e-09	17.4804																										Tet_TH0
Gm16045	2.36095e-08	1.2149e-07	9.76895																										Tet_TH0
Rflna	3.62948e-07	1.65145e-06	10.3481																										Tet_TH0
Fgfr1	9.82031e-10	5.75709e-09	-15.926																										Tet_TH0
H2-DMb1	1.43904e-08	7.58556e-08	13.3018																										Tet_TH0
Adgrg5	1.55127e-30	2.90293e-29	-12.6633																										Tet_TH0
Kif2c	0.000233093	0.000735948	4.10663	chr4	117189904	117190304	401	*	4.59415	3.94125	5.16494	-1.07056	0.000417868	0.00364083	Exon (ENSMUST00000093716.2/ENSMUST00000093716.2, exon 1 of 1)	4	117159639	117182639	23001	2	73804	-7265	ENSMUSG00000028678	Kif2c	kinesin family member 2C	20116;100217424;100216533;73804;381544	0;-35320;-34056;0;0	chr4:117189904-117190304	Tet_TH0	Open
Gm45552	2.31382e-08	1.19182e-07	-6.99871																										Tet_TH0
Pkd2	3.40336e-22	4.41437e-21	22.8391																										Tet_TH0
C430002N11Rik	1.34084e-15	1.21143e-14	21.2301																										Tet_TH0
Stfa3	4.64424e-26	7.29613e-25	83.5095																										Tet_TH0
Gm13528	6.09919e-13	4.65012e-12	23.7127																										Tet_TH0
AC153887.1	0.000163604	0.000527709	5.95535																										Tet_TH0
Card10	7.62697e-06	2.96755e-05	4.64492																										Tet_TH0
Cd300lf	0.0001014	0.000336428	4.65101	chr11	115128473	115128873	401	*	3.60465	4.25357	1.56168	1.65389	0.000886724	0.00681146	Intron (ENSMUST00000131046.1/58222, intron 1 of 1)	11	115116214	115133992	17779	2	246746	5119	ENSMUSG00000047798	Cd300lf	CD300 molecule like family member F	58222;246746;26941	0;0;0	chr11:115128473-115128873	Tet_TH0	Closed
Mob3b	1.2297e-25	1.89458e-24	-4.12448																										Tet_TH0
Plxnb3	0.00147758	0.00408257	4.64605																										Tet_TH0
Tnfaip2	5.6439e-08	2.79943e-07	8.64467																										Tet_TH0
Map1a	2.41626e-05	8.77268e-05	7.33386																										Tet_TH0
Ciita	1.86897e-08	9.73562e-08	6.74434																										Tet_TH0
Lrrn4	1.23821e-14	1.04755e-13	18.9167																										Tet_TH0
Fscn1	2.02481e-12	1.47856e-11	19.1247																										Tet_TH0
Elfn1	1.5167e-07	7.17815e-07	9.78689																										Tet_TH0
Hopx	6.56891e-09	3.57432e-08	7.40197																										Tet_TH0
Cldn4	3.30957e-10	2.01536e-09	-19.0015																										Tet_TH0
Adam1a	6.79878e-24	9.66405e-23	-4.20822																										Tet_TH0
Car15	4.74323e-11	3.09062e-10	-5.10679																										Tet_TH0
Ube2cbp	8.55702e-10	5.03927e-09	-4.6746	chr9	86373128	86373528	401	*	3.55055	2.661	4.24086	-1.31072	0.000454686	0.00390309	Intron (ENSMUST00000034986.13/70348, intron 8 of 9)	9	86307306	86464950	157645	2	70348	91422	ENSMUSG00000032415	Ube2cbp	ubiquitin-conjugating enzyme E2C binding protein	70348	0	chr9:86373128-86373528	Tet_TH0	Open
Klk1b9	5.11244e-05	0.000177452	7.03732																										Tet_TH0
Chd3os	6.27511e-29	1.10269e-27	7.07518																										Tet_TH0
Rhov	7.59597e-05	0.000256616	6.51419																										Tet_TH0
Npas4	2.38102e-06	9.86689e-06	6.58172																										Tet_TH0
Gm37856	3.60206e-15	3.16217e-14	-8.28568																										Tet_TH0
Ripor3	7.48129e-17	7.30631e-16	-8.8956																										Tet_TH0
Mapk12	4.49515e-21	5.53966e-20	5.37327																										Tet_TH0
Ift43	1.15333e-12	8.58814e-12	10.18																										Tet_TH0
Pdzd2	8.37831e-08	4.07774e-07	6.77018	chr15	12598756	12599156	401	*	3.71704	4.42367	1.04913	2.40098	1.45918e-06	3.1815e-05	Exon (ENSMUST00000189746.1/68070, exon 1 of 3)	15	12359711	12739924	380214	2	68070	140768	ENSMUSG00000022197	Pdzd2	PDZ domain containing 2	68070	0	chr15:12598756-12599156	Tet_TH0	Closed
Pdzd2	8.37831e-08	4.07774e-07	6.77018	chr15	12739736	12740136	401	*	3.79634	4.22532	2.90279	1.26366	0.00103682	0.00775923	Promoter (<=1kb)	15	12359711	12739924	380214	2	68070	0	ENSMUSG00000022197	Pdzd2	PDZ domain containing 2	68070	0	chr15:12739736-12740136	Tet_TH0	Closed
Ovgp1	1.99366e-20	2.37511e-19	-8.35335																										Tet_TH0
Mef2c	4.61566e-09	2.54284e-08	11.4132																										Tet_TH0
Gm32742	1.17343e-06	5.04396e-06	7.52865																										Tet_TH0
Gm15452	8.95203e-09	4.81424e-08	4.34598																										Tet_TH0
Hmcn2	7.56293e-06	2.94638e-05	7.55579																										Tet_TH0
Bcat1	1.52656e-13	1.21289e-12	8.95424																										Tet_TH0
Rnf32	3.80459e-36	8.72449e-35	-7.45271	chr5	29205690	29206090	401	*	4.22862	3.16499	4.99027	-1.50156	4.23924e-05	0.000541658	3' UTR	5	29195992	29225524	29533	1	56874	9698	ENSMUSG00000029130	Rnf32	ring finger protein 32	56874;56873	0;0	chr5:29205690-29206090	Tet_TH0	Open
Col1a1	3.2972e-09	1.84887e-08	6.83403																										Tet_TH0
Hpse	2.56077e-09	1.4532e-08	6.1968																										Tet_TH0
Slc25a27	8.95798e-30	1.63649e-28	-5.02482																										Tet_TH0
Ptprm	0.000766094	0.00221709	4.8155																										Tet_TH0
Mir142hg	3.1913e-35	7.06067e-34	-5.51424																										Tet_TH0
Trav3-3	4.41721e-250	2.13187e-247	14.6114																										Tet_TH0
Zfp354c	3.08405e-41	8.31212e-40	-5.20822																										Tet_TH0
St6galnac3	3.43002e-08	1.73406e-07	4.45972																										Tet_TH0
Ggt1	1.03179e-11	7.131e-11	-18.2977	chr10	75565439	75565839	401	*	5.49564	4.89379	6.03646	-1.00134	0.000487332	0.00413698	Intron (ENSMUST00000145079.7/14598, intron 3 of 6)	10	75561604	75586200	24597	1	14598	3835	ENSMUSG00000006345	Ggt1	gamma-glutamyltransferase 1	68778;67332;192734;14598;23887	0;0;-5109;0;0	chr10:75565439-75565839	Tet_TH0	Open
Fam240a	2.2915e-12	1.66569e-11	-36.8292	chr9	110916782	110917182	401	*	4.40784	3.35813	5.16422	-1.56296	6.30876e-06	0.000109406	Promoter (<=1kb)	9	110914739	110916861	2123	2	235634	0	ENSMUSG00000096393	Fam240a	family with sequence similarity 240 member A	20776;235633;235634;21667;74249	0;0;0;28976;0	chr9:110916782-110917182	Tet_TH0	Open
Fam240a	2.2915e-12	1.66569e-11	-36.8292	chr9	110907463	110907863	401	*	5.82535	5.05679	6.45824	-1.25847	3.70626e-05	0.000484383	Distal Intergenic	9	110914739	110916861	2123	2	235634	8998	ENSMUSG00000096393	Fam240a	family with sequence similarity 240 member A	235631;20776;235633;235634;21667;74249	49496;0;0;0;38295;0	chr9:110907463-110907863	Tet_TH0	Open
Lrp12	2.78094e-19	3.16234e-18	-4.5709	chr15	39913380	39913780	401	*	4.36411	2.93661	5.24196	-1.96903	3.65714e-08	1.43649e-06	Intron (ENSMUST00000022916.12/239393, intron 1 of 6)	15	39870589	39943994	73406	2	239393	30214	ENSMUSG00000022305	Lrp12	low density lipoprotein-related protein 12	239393;105976	0;0	chr15:39913380-39913780	Tet_TH0	Open
Lrp12	2.78094e-19	3.16234e-18	-4.5709	chr15	39905011	39905411	401	*	3.74593	2.65948	4.51607	-1.5834	2.86128e-05	0.000390791	Intron (ENSMUST00000022916.12/239393, intron 1 of 6)	15	39870589	39943994	73406	2	239393	38583	ENSMUSG00000022305	Lrp12	low density lipoprotein-related protein 12	64705;239393	-47541;0	chr15:39905011-39905411	Tet_TH0	Open
Hotairm1	9.97754e-11	6.32836e-10	-23.2751																										Tet_TH0
Cd180	0.000377682	0.00114894	4.48922																										Tet_TH0
5830468F06Rik	2.50145e-06	1.03391e-05	-7.14108																										Tet_TH0
Gm20394	6.85032e-09	3.72256e-08	13.883																										Tet_TH0
Lxn	1.56613e-13	1.2429e-12	10.5737																										Tet_TH0
Exph5	2.04309e-41	5.54253e-40	17.2442	chr9	53301298	53301698	401	*	4.13967	2.81182	4.98942	-1.78545	3.36222e-06	6.45199e-05	Promoter (<=1kb)	9	53301670	53377514	75845	1	320051	0	ENSMUSG00000034584	Exph5	exophilin 5	320051	0	chr9:53301298-53301698	Tet_TH0	Open
Jakmip2	2.69788e-08	1.37802e-07	12.4654																										Tet_TH0
Tspan4	3.24451e-07	1.48246e-06	4.62493																										Tet_TH0
Gm5596	1.84183e-06	7.73441e-06	9.32964																										Tet_TH0
Fzd6	1.1762e-28	2.03583e-27	94.5305																										Tet_TH0
Mertk	8.67844e-07	3.7821e-06	9.00009																										Tet_TH0
Coprs	1.96269e-11	1.32375e-10	11.7908																										Tet_TH0
Dcbld2	6.49803e-07	2.8674e-06	4.46619																										Tet_TH0
Kdm4d	3.61254e-13	2.79847e-12	23.6753																										Tet_TH0
Irf4	4.02288e-32	7.95113e-31	14.0379	chr13	30742468	30742868	401	*	4.83705	3.41786	5.71264	-2.04624	1.36982e-10	1.38206e-08	Distal Intergenic	13	30749226	30766976	17751	1	16364	-6358	ENSMUSG00000021356	Irf4	interferon regulatory factor 4	105352;16364	0;0	chr13:30742468-30742868	Tet_TH0	Open
Irf4	4.02288e-32	7.95113e-31	14.0379	chr13	30824889	30825289	401	*	3.50855	2.24315	4.33937	-1.73257	1.2529e-05	0.00019435	Intron (ENSMUST00000102946.7/66482, intron 25 of 28)	13	30749226	30766976	17751	1	16364	75663	ENSMUSG00000021356	Irf4	interferon regulatory factor 4	66482	0	chr13:30824889-30825289	Tet_TH0	Open
Irf4	4.02288e-32	7.95113e-31	14.0379	chr13	30817425	30817825	401	*	4.78145	4.05776	5.39115	-1.14134	0.000302533	0.00277841	Intron (ENSMUST00000102946.7/66482, intron 28 of 28)	13	30749226	30766976	17751	1	16364	68199	ENSMUSG00000021356	Irf4	interferon regulatory factor 4	66482	0	chr13:30817425-30817825	Tet_TH0	Open
Irf4	4.02288e-32	7.95113e-31	14.0379	chr13	30792276	30792676	401	*	5.45733	4.74821	6.05925	-1.13895	0.000309986	0.00283674	Intron (ENSMUST00000222202.1/ENSMUST00000222202.1, intron 1 of 1)	13	30749226	30766976	17751	1	16364	43050	ENSMUSG00000021356	Irf4	interferon regulatory factor 4	16364;66482	0;0	chr13:30792276-30792676	Tet_TH0	Open
Cfap126	1.02634e-08	5.47547e-08	13.7488																										Tet_TH0
Hcar2	1.00253e-05	3.84647e-05	7.99727																										Tet_TH0
Plaur	2.84049e-10	1.74096e-09	-13.1253	chr7	24467894	24468294	401	*	4.6206	2.80577	5.58729	-2.44477	1.079e-11	1.58631e-09	Intron (ENSMUST00000002284.10/18793, intron 3 of 6)	7	24462484	24475968	13485	1	18793	5410	ENSMUSG00000046223	Plaur	plasminogen activator, urokinase receptor	71997;210145;18793;260299;232969	0;0;0;0;0	chr7:24467894-24468294	Tet_TH0	Open
Liph	7.98181e-06	3.09909e-05	4.80612																										Tet_TH0
Etnk2	4.61168e-10	2.77168e-09	15.6812																										Tet_TH0
March1	0.000148333	0.000480919	5.22957																										Tet_TH0
Abcb1b	6.62444e-11	4.27611e-10	7.38813																										Tet_TH0
Ccnb1-ps	2.96539e-05	0.000106215	4.13995																										Tet_TH0
Cd55b	1.26142e-07	6.02909e-07	-11.8335																										Tet_TH0
Tal2	0.000774073	0.00223831	4.81277																										Tet_TH0
Gm21970	2.1256e-10	1.31758e-09	12.9385																										Tet_TH0
Gm12534	1.46337e-15	1.31697e-14	11.7627																										Tet_TH0
Gm7420	2.97803e-12	2.14669e-11	-8.64289																										Tet_TH0
9530077C05Rik	8.71197e-10	5.1218e-09	10.1526																										Tet_TH0
Fibcd1	2.36501e-16	2.23705e-15	4.44181																										Tet_TH0
Adgrf5	2.39096e-14	1.99676e-13	-23.2922																										Tet_TH0
Lrrc23	2.74335e-10	1.6839e-09	-6.10124																										Tet_TH0
Glt28d2	2.30559e-09	1.31486e-08	9.18199																										Tet_TH0
Tlr12	2.96269e-10	1.81318e-09	-7.71578																										Tet_TH0
Zfp618	6.58224e-08	3.23393e-07	-11.0284																										Tet_TH0
Auts2	2.76699e-12	2.00151e-11	-9.2012																										Tet_TH0
Rapsn	2.33827e-06	9.70328e-06	4.70957																										Tet_TH0
Krt6b	0.000262446	0.000821004	5.79467																										Tet_TH0
Lcn4	7.71683e-05	0.000260318	-5.33479	chr2	26668726	26669126	401	*	5.20526	4.0487	6.00038	-1.72373	1.10525e-07	3.61909e-06	Intron (ENSMUST00000028283.1/16821, intron 4 of 6)	2	26667674	26671282	3609	2	16821	2156	ENSMUSG00000026919	Lcn4	lipocalin 4	56279;100306955;100306954;16821	0;-30741;0;0	chr2:26668726-26669126	Tet_TH0	Open
Card9	1.086e-14	9.22925e-14	-7.69283																										Tet_TH0
Gm7799	3.06731e-09	1.72603e-08	7.88967																										Tet_TH0
Mb21d1	7.95918e-51	2.76678e-49	-5.89285																										Tet_TH0
Colca2	2.73228e-05	9.83573e-05	7.32447																										Tet_TH0
Pirb	2.3459e-05	8.53666e-05	4.99697																										Tet_TH0
Iglc1	5.74302e-09	3.13892e-08	15.5643																										Tet_TH0
Plod2	5.22811e-21	6.42766e-20	19.3208																										Tet_TH0
Igkv3-9	9.30828e-12	6.46286e-11	21.3339																										Tet_TH0
Celf3	0.00217914	0.00583231	4.60933																										Tet_TH0
Gm16894	0.000523604	0.00155768	5.4316																										Tet_TH0
Timd4	3.46702e-05	0.000123099	6.76939																										Tet_TH0
Syne3	2.55419e-83	1.66689e-81	7.0128																										Tet_TH0
Fam167a	1.30427e-05	4.92762e-05	7.26226																										Tet_TH0
Amz1	9.71637e-20	1.12966e-18	-7.9917																										Tet_TH0
Ttk	3.35052e-05	0.000119195	5.04963																										Tet_TH0
Gm15918	6.97459e-12	4.89164e-11	21.2993																										Tet_TH0
Elovl7	1.52205e-12	1.12091e-11	-14.0723	chr13	108191307	108191707	401	*	3.73786	2.4286	4.58208	-1.83626	2.81707e-06	5.55685e-05	Intron (ENSMUST00000123657.7/71991, intron 10 of 10)	13	108214404	108285683	71280	1	74559	-22697	ENSMUSG00000021696	Elovl7	ELOVL family member 7, elongation of long chain fatty acids (yeast)	75597;71991;74559	0;0;0	chr13:108191307-108191707	Tet_TH0	Open
Zbed3	8.48794e-19	9.35477e-18	5.59004																										Tet_TH0
Atcayos	5.64493e-07	2.50747e-06	9.45467																										Tet_TH0
4930579C12Rik	3.05244e-08	1.55035e-07	12.7302																										Tet_TH0
Cfap54	0.000229125	0.000724301	4.87817	chr10	93041905	93042305	401	*	3.76576	2.59964	4.56416	-1.65036	1.66433e-05	0.000246596	Intron (ENSMUST00000168110.7/380654, intron 9 of 66)	10	92775619	93081618	306000	2	380654	39313	ENSMUSG00000020014	Cfap54	cilia and flagella associated protein 54	380654	0	chr10:93041905-93042305	Tet_TH0	Open
Zbtb46	1.39018e-11	9.50593e-11	12.8204																										Tet_TH0
Mmp11	1.41572e-12	1.04631e-11	-5.06659																										Tet_TH0
Kcnq1	7.33528e-06	2.8636e-05	8.39288																										Tet_TH0
Slc4a5	8.48646e-13	6.38808e-12	10.0083																										Tet_TH0
1700063D05Rik	2.47838e-05	8.9825e-05	6.99398	chr9	41181312	41181712	401	*	4.10446	2.91174	4.91183	-1.67483	1.11311e-05	0.000176154	Intron (ENSMUST00000215869.1/ENSMUST00000215869.1, intron 6 of 7)	9	41192446	41217990	25545	1	78500	-10734	ENSMUSG00000100837	1700063D05Rik	RIKEN cDNA 1700063D05 gene	72828;78500	0;0	chr9:41181312-41181712	Tet_TH0	Open
E530011L22Rik	5.70049e-06	2.25295e-05	6.22782																										Tet_TH0
Ltbp3	3.07957e-05	0.000110095	7.30206																										Tet_TH0
Snai2	1.22866e-09	7.15444e-09	15.6522																										Tet_TH0
Flrt2	3.22109e-36	7.41101e-35	149.719																										Tet_TH0
Gm46404	5.35582e-07	2.38467e-06	4.60942																										Tet_TH0
Wdfy3	0.00026891	0.000839454	4.10193																										Tet_TH0
Rph3a	1.9154e-24	2.79146e-23	71.9639																										Tet_TH0
Gm6104	2.81766e-13	2.19665e-12	8.1235																										Tet_TH0
Atxn1	6.05863e-89	4.30599e-87	5.87373	chr13	45917290	45917690	401	*	4.81633	5.59665	0.28766	3.41748	1.46288e-10	1.44757e-08	Intron (ENSMUST00000091628.10/20238, intron 2 of 7)	13	45549755	45965008	415254	2	20238	47318	ENSMUSG00000046876	Atxn1	ataxin 1	20238	0	chr13:45917290-45917690	Tet_TH0	Closed
Atxn1	6.05863e-89	4.30599e-87	5.87373	chr13	45935808	45936208	401	*	4.14831	4.72821	2.59338	1.87183	1.86219e-06	3.89062e-05	Exon (ENSMUST00000222376.1/ENSMUST00000222376.1, exon 1 of 2)	13	45549755	45965008	415254	2	20238	28800	ENSMUSG00000046876	Atxn1	ataxin 1	20238	0	chr13:45935808-45936208	Tet_TH0	Closed
Atxn1	6.05863e-89	4.30599e-87	5.87373	chr13	45932439	45932839	401	*	3.28497	4.00886	0.354301	2.33415	1.68506e-05	0.000248951	Intron (ENSMUST00000091628.10/20238, intron 2 of 7)	13	45549755	45965008	415254	2	20238	32169	ENSMUSG00000046876	Atxn1	ataxin 1	20238	0	chr13:45932439-45932839	Tet_TH0	Closed
Atxn1	6.05863e-89	4.30599e-87	5.87373	chr13	45850623	45851023	401	*	4.70382	5.20338	3.54632	1.57963	2.48306e-05	0.000346521	Intron (ENSMUST00000091628.10/20238, intron 3 of 7)	13	45549755	45965008	415254	2	20238	113985	ENSMUSG00000046876	Atxn1	ataxin 1	20238	0	chr13:45850623-45851023	Tet_TH0	Closed
Atxn1	6.05863e-89	4.30599e-87	5.87373	chr13	45837567	45837967	401	*	3.84723	4.59895	0.345388	2.15702	7.58821e-05	0.00088671	Intron (ENSMUST00000091628.10/20238, intron 3 of 7)	13	45549755	45965008	415254	2	20238	127041	ENSMUSG00000046876	Atxn1	ataxin 1	20238	0	chr13:45837567-45837967	Tet_TH0	Closed
Atxn1	6.05863e-89	4.30599e-87	5.87373	chr13	45907362	45907762	401	*	3.83963	4.31889	2.76446	1.33547	0.000649389	0.00524507	Intron (ENSMUST00000091628.10/20238, intron 2 of 7)	13	45549755	45965008	415254	2	20238	57246	ENSMUSG00000046876	Atxn1	ataxin 1	20238	0	chr13:45907362-45907762	Tet_TH0	Closed
Chst3	1.01915e-05	3.90734e-05	6.53637																										Tet_TH0
4930520O04Rik	9.92421e-09	5.30271e-08	6.29714																										Tet_TH0
Car5b	2.5409e-49	8.54641e-48	31.4683	chrX	164013314	164013714	401	*	4.13106	4.78084	2.08078	2.0871	1.86969e-06	3.90176e-05	Exon (ENSMUST00000126650.1/56078, exon 2 of 2)	20	163976822	164027997	51176	2	56078	14283	ENSMUSG00000031373	Car5b	carbonic anhydrase 5b, mitochondrial	56078	0	chrX:164013314-164013714	Tet_TH0	Closed
Tgfb1i1	1.5748e-21	1.99036e-20	-4.36821																										Tet_TH0
Clec4n	9.6338e-05	0.000320761	4.70921																										Tet_TH0
Ighj1	4.08884e-07	1.8463e-06	10.5085																										Tet_TH0
Gm13546	0.000184276	0.00059108	-4.52865	chr2	58123656	58124056	401	*	3.89821	1.15255	4.99213	-3.02974	4.51214e-11	5.39943e-09	Distal Intergenic	2	58164001	58177063	13063	1	100042926	-39945	ENSMUSG00000086862	Gm13546	predicted gene 13546	227929;100042926	0;-39945	chr2:58123656-58124056	Tet_TH0	Open
Gm13546	0.000184276	0.00059108	-4.52865	chr2	58179102	58179502	401	*	5.53474	4.5946	6.24704	-1.48295	1.3279e-06	2.94155e-05	Intron (ENSMUST00000144117.7/227929, intron 1 of 7)	2	58164001	58177063	13063	1	100042926	15101	ENSMUSG00000086862	Gm13546	predicted gene 13546	227929;100042926	0;15101	chr2:58179102-58179502	Tet_TH0	Open
Gm13546	0.000184276	0.00059108	-4.52865	chr2	58155569	58155969	401	*	5.16947	4.40903	5.79824	-1.24771	2.09316e-05	0.00029939	Intron (ENSMUST00000028175.6/227929, intron 1 of 7)	2	58164001	58177063	13063	1	100042926	-8032	ENSMUSG00000086862	Gm13546	predicted gene 13546	227929;100042926	0;-8032	chr2:58155569-58155969	Tet_TH0	Open
Gm13546	0.000184276	0.00059108	-4.52865	chr2	58135078	58135478	401	*	5.19555	4.40859	5.83764	-1.24554	8.22733e-05	0.000948592	Intron (ENSMUST00000028175.6/227929, intron 7 of 7)	2	58164001	58177063	13063	1	100042926	-28523	ENSMUSG00000086862	Gm13546	predicted gene 13546	227929;100042926	0;-28523	chr2:58135078-58135478	Tet_TH0	Open
Gm13546	0.000184276	0.00059108	-4.52865	chr2	58150049	58150449	401	*	3.6276	2.59899	4.37586	-1.49625	8.86506e-05	0.00100729	Intron (ENSMUST00000028175.6/227929, intron 3 of 7)	2	58164001	58177063	13063	1	100042926	-13552	ENSMUSG00000086862	Gm13546	predicted gene 13546	227929;100042926	0;-13552	chr2:58150049-58150449	Tet_TH0	Open
Hunk	7.71422e-15	6.62912e-14	28.0258																										Tet_TH0
Col7a1	6.52267e-15	5.64206e-14	-11.5445																										Tet_TH0
Blnk	4.44669e-06	1.78151e-05	5.41263																										Tet_TH0
Clec12a	0.000130716	0.000427744	6.07747																										Tet_TH0
Fam69c	2.31535e-05	8.43583e-05	7.46873																										Tet_TH0
S100a3	1.76589e-06	7.43962e-06	5.92036																										Tet_TH0
Apba1	2.53515e-10	1.56165e-09	17.6406																										Tet_TH0
Trav16d-dv11	7.78888e-45	2.3632e-43	7.22563																										Tet_TH0
Bace2	0.00102674	0.00291292	4.99005	chr16	97293285	97293685	401	*	4.14582	3.38952	4.77248	-1.12178	0.00100892	0.00760099	Distal Intergenic	16	97356742	97442936	86195	1	56175	-63057	ENSMUSG00000040605	Bace2	beta-site APP-cleaving enzyme 2			chr16:97293285-97293685	Tet_TH0	Open
Tmem220	8.02967e-11	5.14161e-10	5.12643																										Tet_TH0
Plce1	3.50914e-08	1.77147e-07	-11.6809																										Tet_TH0
Fam83d	2.57451e-05	9.30652e-05	4.65989																										Tet_TH0
Rasgrp3	3.14975e-08	1.59782e-07	13.137																										Tet_TH0
Lypd6b	3.72662e-05	0.000131662	-7.68211	chr2	49846096	49846496	401	*	4.78072	3.07192	5.72591	-2.31871	7.14311e-12	1.12353e-09	Intron (ENSMUST00000028103.12/71897, intron 1 of 9)	2	49787688	49948849	161162	1	71897	58408	ENSMUSG00000026765	Lypd6b	LY6/PLAUR domain containing 6B	71897	0	chr2:49846096-49846496	Tet_TH0	Open
Lypd6b	3.72662e-05	0.000131662	-7.68211	chr2	49868236	49868636	401	*	4.88065	3.04682	5.85099	-2.41866	4.22129e-11	5.08517e-09	Intron (ENSMUST00000028103.12/71897, intron 3 of 9)	2	49787688	49948849	161162	1	71897	80548	ENSMUSG00000026765	Lypd6b	LY6/PLAUR domain containing 6B	71897	0	chr2:49868236-49868636	Tet_TH0	Open
Lypd6b	3.72662e-05	0.000131662	-7.68211	chr2	49847730	49848130	401	*	3.98141	2.67425	4.825	-1.80539	2.74243e-06	5.43043e-05	Intron (ENSMUST00000028103.12/71897, intron 1 of 9)	2	49787688	49948849	161162	1	71897	60042	ENSMUSG00000026765	Lypd6b	LY6/PLAUR domain containing 6B	71897	0	chr2:49847730-49848130	Tet_TH0	Open
Lypd6b	3.72662e-05	0.000131662	-7.68211	chr2	49742356	49742756	401	*	4.01913	3.21286	4.67068	-1.17761	0.000788665	0.00616738	Intron (ENSMUST00000028102.13/16574, intron 19 of 25)	2	49787688	49948849	161162	1	71897	-44932	ENSMUSG00000026765	Lypd6b	LY6/PLAUR domain containing 6B	16574;71897	0;0	chr2:49742356-49742756	Tet_TH0	Open
Gm42500	6.74335e-09	3.66732e-08	14.0702																										Tet_TH0
2900026A02Rik	1.15555e-28	2.00176e-27	25.5572																										Tet_TH0
Ttyh1	1.96546e-07	9.18675e-07	11.0799																										Tet_TH0
Kctd12	1.05133e-46	3.35149e-45	7.35395																										Tet_TH0
Slc29a4	4.09376e-10	2.47258e-09	11.3579																										Tet_TH0
2610204G07Rik	8.49847e-10	5.00905e-09	16.1588																										Tet_TH0
5530400K19Rik	0.00220534	0.00589559	4.64349																										Tet_TH0
Gas2	5.19878e-15	4.5275e-14	5.42174																										Tet_TH0
Gm7869	3.56692e-11	2.35147e-10	18.6898																										Tet_TH0
Sema6d	7.01536e-05	0.000238437	5.43656																										Tet_TH0
Mtus1	5.01294e-31	9.57071e-30	4.87767																										Tet_TH0
Moxd2	4.2038e-06	1.68876e-05	8.84434																										Tet_TH0
C230085N15Rik	2.60808e-09	1.47843e-08	-11.8996																										Tet_TH0
Gm38214	1.50392e-06	6.39696e-06	9.00738																										Tet_TH0
Lpcat2	4.51736e-05	0.000158012	6.54757																										Tet_TH0
Tmem205	7.85662e-13	5.92688e-12	14.8197																										Tet_TH0
Gm14258	0.000462425	0.00138721	5.56773																										Tet_TH0
Tceal3	3.59684e-09	2.00881e-08	15.6259																										Tet_TH0
Fam20c	8.16695e-07	3.56889e-06	9.36752																										Tet_TH0
Emp1	2.10044e-11	1.41115e-10	6.17245	chr6	135414123	135414523	401	*	4.27342	2.54101	5.22356	-2.21804	1.37869e-08	6.38759e-07	Distal Intergenic	6	135362545	135383173	20629	1	13730	51578	ENSMUSG00000030208	Emp1	epithelial membrane protein 1	13730	0	chr6:135414123-135414523	Tet_TH0	Open
Emp1	2.10044e-11	1.41115e-10	6.17245	chr6	135433720	135434120	401	*	4.6261	3.36108	5.4568	-1.80979	8.251e-08	2.84667e-06	Distal Intergenic	6	135362545	135383173	20629	1	13730	71175	ENSMUSG00000030208	Emp1	epithelial membrane protein 1			chr6:135433720-135434120	Tet_TH0	Open
Emp1	2.10044e-11	1.41115e-10	6.17245	chr6	135450584	135450984	401	*	4.44095	3.35152	5.21219	-1.646	5.2554e-07	1.34303e-05	Distal Intergenic	6	135362545	135383173	20629	1	13730	88039	ENSMUSG00000030208	Emp1	epithelial membrane protein 1			chr6:135450584-135450984	Tet_TH0	Open
Emp1	2.10044e-11	1.41115e-10	6.17245	chr6	135436298	135436698	401	*	4.23113	3.28828	4.94459	-1.40463	3.78841e-05	0.000492438	Distal Intergenic	6	135362545	135383173	20629	1	13730	73753	ENSMUSG00000030208	Emp1	epithelial membrane protein 1			chr6:135436298-135436698	Tet_TH0	Open
Gm37176	1.55079e-16	1.47835e-15	-31.4548																										Tet_TH0
Cd200r3	2.49662e-09	1.41952e-08	-14.4491	chr16	44965412	44965812	401	*	4.48581	2.98303	5.38331	-2.06608	3.27226e-09	1.94174e-07	3' UTR	16	44943678	44981380	37703	1	74603	21734	ENSMUSG00000036172	Cd200r3	CD200 receptor 3	271375;74603	98315;0	chr16:44965412-44965812	Tet_TH0	Open
Cd200r3	2.49662e-09	1.41952e-08	-14.4491	chr16	44970709	44971109	401	*	3.95791	1.86906	4.9722	-2.49714	5.58902e-09	3.03179e-07	Intron (ENSMUST00000164007.7/74603, intron 5 of 5)	16	44943678	44981380	37703	1	74603	27031	ENSMUSG00000036172	Cd200r3	CD200 receptor 3	74603	0	chr16:44970709-44971109	Tet_TH0	Open
Cd200r3	2.49662e-09	1.41952e-08	-14.4491	chr16	45006950	45007350	401	*	5.32176	4.28409	6.07352	-1.61597	5.36248e-08	1.97698e-06	Distal Intergenic	16	44943678	44981380	37703	1	74603	63272	ENSMUSG00000036172	Cd200r3	CD200 receptor 3	74603	0	chr16:45006950-45007350	Tet_TH0	Open
Cd200r3	2.49662e-09	1.41952e-08	-14.4491	chr16	44964935	44965335	401	*	3.97192	2.67579	4.81219	-1.83242	1.32224e-06	2.93406e-05	Exon (ENSMUST00000048479.13/74603, exon 6 of 6)	16	44943678	44981380	37703	1	74603	21257	ENSMUSG00000036172	Cd200r3	CD200 receptor 3	271375;74603	97838;0	chr16:44964935-44965335	Tet_TH0	Open
Cd200r3	2.49662e-09	1.41952e-08	-14.4491	chr16	45016483	45016883	401	*	3.617	2.57607	4.37001	-1.44898	0.000236958	0.00226761	Distal Intergenic	16	44943678	44981380	37703	1	74603	72805	ENSMUSG00000036172	Cd200r3	CD200 receptor 3	74603	0	chr16:45016483-45016883	Tet_TH0	Open
Trim38	6.29188e-26	9.83249e-25	81.4367																										Tet_TH0
Ly86	0.000112587	0.000370701	4.7189	chr13	37537693	37538093	401	*	4.45351	3.51247	5.1662	-1.43259	1.10567e-05	0.000175364	Distal Intergenic	13	37345208	37419036	73829	1	17084	192485	ENSMUSG00000021423	Ly86	lymphocyte antigen 86			chr13:37537693-37538093	Tet_TH0	Open
Ighg1	1.85412e-28	3.1906e-27	65.3668																										Tet_TH0
Fam186b	1.5742e-05	5.88e-05	-7.83213																										Tet_TH0
Gm5362	1.53865e-06	6.53717e-06	5.31115																										Tet_TH0
Ly6k	1.72216e-07	8.108e-07	-5.24505																										Tet_TH0
Gm42743	3.43002e-27	5.63158e-26	-7.49361																										Tet_TH0
Pak6	1.71512e-19	1.96977e-18	12.7459	chr2	118642424	118642824	401	*	5.23178	4.62895	5.77318	-0.968137	0.00114887	0.00843025	Distal Intergenic	2	118663303	118698020	34718	1	214230	-20479	ENSMUSG00000074923	Pak6	p21 (RAC1) activated kinase 6	12236;214230	0;0	chr2:118642424-118642824	Tet_TH0	Open
Gm14668	4.80965e-06	1.91878e-05	8.89979																										Tet_TH0
Carmil1	2.61392e-11	1.74427e-10	9.47669																										Tet_TH0
Gm2663	4.4559e-11	2.90888e-10	22.3536																										Tet_TH0
Zfand4	7.60027e-07	3.32971e-06	4.52572																										Tet_TH0
Meg3	4.62751e-07	2.07553e-06	10.494																										Tet_TH0
Gm45155	9.15185e-05	0.000306138	-4.22515																										Tet_TH0
Speg	2.55736e-15	2.26324e-14	6.78805	chr1	75381910	75382310	401	*	3.74296	4.21871	2.68146	1.29685	0.00085704	0.00661589	5' UTR	1	75375297	75432320	57024	1	11790	6613	ENSMUSG00000026207	Speg	SPEG complex locus	13346;100503248;11790	21581;-6898;0	chr1:75381910-75382310	Tet_TH0	Closed
Obscn	2.24784e-18	2.41832e-17	30.1037																										Tet_TH0
Sncb	2.16239e-05	7.90072e-05	7.91137	chr13	54758389	54758789	401	*	3.62809	4.09684	2.59338	1.25758	0.00123417	0.00895597	Distal Intergenic	13	54758860	54766595	7736	2	104069	7806	ENSMUSG00000034891	Sncb	synuclein, beta	268663;26913;104069;218268;74257	0;-8515;0;-25209;-30588	chr13:54758389-54758789	Tet_TH0	Closed
Ube2c	0.000456502	0.00137043	5.35871																										Tet_TH0
Ncf2	1.79287e-08	9.36742e-08	4.87367																										Tet_TH0
Itgam	0.000151471	0.000490477	-5.60823																										Tet_TH0
Coch	1.3134e-20	1.58029e-19	44.9855																										Tet_TH0
Sqle	2.34798e-32	4.68535e-31	-4.04892																										Tet_TH0
Hhex	3.97498e-10	2.40364e-09	10.6435																										Tet_TH0
Tmem159	2.85474e-23	3.93129e-22	11.4174																										Tet_TH0
Ccr5	9.43025e-113	9.7853e-111	283.103																										Tet_TH0
Mzb1	4.2306e-11	2.77139e-10	20.421																										Tet_TH0
Iqgap3	9.59465e-05	0.000319714	7.06346																										Tet_TH0
Hbb-bt	1.40119e-09	8.11352e-09	8.98237																										Tet_TH0
Hacd4	0.000368026	0.00112302	5.35321																										Tet_TH0
Gm26615	1.17434e-07	5.63491e-07	-7.41976																										Tet_TH0
Oasl1	9.76406e-24	1.37752e-22	-11.7651																										Tet_TH0
Boll	2.2467e-05	8.19579e-05	-4.91222																										Tet_TH0
Qpct	1.78777e-05	6.61937e-05	-6.74864	chr17	79093284	79093684	401	*	5.44628	3.67715	6.40394	-2.43306	7.97719e-14	2.63606e-11	Distal Intergenic	17	79051906	79090378	38473	1	70536	41378	ENSMUSG00000024084	Qpct	glutaminyl-peptide cyclotransferase (glutaminyl cyclase)	70536	0	chr17:79093284-79093684	Tet_TH0	Open
Qpct	1.78777e-05	6.61937e-05	-6.74864	chr17	79099847	79100247	401	*	4.51704	3.78022	5.13364	-1.1171	0.000709405	0.00564949	Distal Intergenic	17	79051906	79090378	38473	1	70536	47941	ENSMUSG00000024084	Qpct	glutaminyl-peptide cyclotransferase (glutaminyl cyclase)	70536	0	chr17:79099847-79100247	Tet_TH0	Open
Adamts3	5.23218e-07	2.33062e-06	5.45311																										Tet_TH0
2210408F21Rik	6.11785e-07	2.70712e-06	8.70561	chr6	31240083	31240483	401	*	4.26921	3.13939	5.055	-1.63918	2.63605e-06	5.24864e-05	Intron (ENSMUST00000144612.7/73652, intron 1 of 5)	6	31220351	31337404	117054	1	73652	19732	ENSMUSG00000087380	2210408F21Rik	RIKEN cDNA 2210408F21 gene	232685;73652	0;0	chr6:31240083-31240483	Tet_TH0	Open
Ighg3	6.97244e-05	0.000237095	7.00484																										Tet_TH0
Sh2d1b1	0.00011881	0.000390013	5.97691																										Tet_TH0
S1pr3	1.06803e-16	1.03092e-15	39.7398	chr13	51397767	51398167	401	*	3.48548	4.18758	0.878813	2.34911	3.62382e-06	6.88793e-05	Intron (ENSMUST00000222417.1/ENSMUST00000222417.1, intron 1 of 2)	13	51408639	51422797	14159	1	13610	-10472	ENSMUSG00000067586	S1pr3	sphingosine-1-phosphate receptor 3	13610;20418	0;171320	chr13:51397767-51398167	Tet_TH0	Closed
Wnk4	2.76077e-14	2.29636e-13	-9.18354																										Tet_TH0
Arhgap32	1.30495e-05	4.92932e-05	6.8576																										Tet_TH0
Trat1	6.54421e-16	6.02003e-15	-14.5463	chr16	48786277	48786677	401	*	4.59139	2.54326	5.59926	-2.61983	1.95193e-12	3.64284e-10	Distal Intergenic	16	48730774	48772021	41248	2	77647	-14256	ENSMUSG00000030775	Trat1	T cell receptor associated transmembrane adaptor 1	77647;57263	0;-30179	chr16:48786277-48786677	Tet_TH0	Open
Trat1	6.54421e-16	6.02003e-15	-14.5463	chr16	48772003	48772403	401	*	4.00086	2.97061	4.74975	-1.53843	3.21032e-05	0.000430822	Promoter (<=1kb)	16	48730774	48772021	41248	2	77647	0	ENSMUSG00000030775	Trat1	T cell receptor associated transmembrane adaptor 1	77647;57263	0;-44453	chr16:48772003-48772403	Tet_TH0	Open
Trat1	6.54421e-16	6.02003e-15	-14.5463	chr16	48627306	48627706	401	*	3.91271	2.93571	4.64037	-1.35745	0.00038713	0.00342017	Exon (ENSMUST00000232195.1/17450, exon 6 of 6)	16	48730774	48772021	41248	2	77647	144315	ENSMUSG00000030775	Trat1	T cell receptor associated transmembrane adaptor 1	17450	0	chr16:48627306-48627706	Tet_TH0	Open
Fgl2	2.22861e-36	5.17341e-35	123.684																										Tet_TH0
P2ry13	0.00012026	0.000394585	5.10587	chr3	59234890	59235290	401	*	4.34988	2.68881	5.28476	-2.23477	1.00498e-09	7.29808e-08	Exon (ENSMUST00000199659.4/329650, exon 19 of 44)	3	59207892	59210882	2991	2	74191	-24008	ENSMUSG00000036362	P2ry13	purinergic receptor P2Y, G-protein coupled 13	329650;84111;74191;70839	0;-39786;-24008;0	chr3:59234890-59235290	Tet_TH0	Open
P2ry13	0.00012026	0.000394585	5.10587	chr3	59228701	59229101	401	*	3.89864	3.08974	4.55147	-1.26013	0.000482033	0.00410167	Intron (ENSMUST00000199659.4/329650, intron 16 of 43)	3	59207892	59210882	2991	2	74191	-17819	ENSMUSG00000036362	P2ry13	purinergic receptor P2Y, G-protein coupled 13	329650;84111;74191;70839	0;-33597;-17819;0	chr3:59228701-59229101	Tet_TH0	Open
4931408C20Rik	9.18938e-11	5.84454e-10	-28.263																										Tet_TH0
Chrm4	1.4334e-06	6.10705e-06	9.78729																										Tet_TH0
Ildr1	4.76448e-13	3.654e-12	7.0287																										Tet_TH0
Ehf	0.00178096	0.00484535	4.61705																										Tet_TH0
Iglc3	3.2326e-09	1.81412e-08	16.2115																										Tet_TH0
Alas2	2.20595e-07	1.02715e-06	11.758																										Tet_TH0
Gm11346	0.000343115	0.00105398	-6.2252	chr13	24587492	24587892	401	*	3.99716	2.31352	4.93697	-2.21701	5.44962e-09	2.97409e-07	Intron (ENSMUST00000238974.1/193385, intron 1 of 13)	13	24596347	24604925	8579	2	76024	17033		Gm11346	X-linked lymphocyte-regulated 5 pseudogene	193385;76024	0;0	chr13:24587492-24587892	Tet_TH0	Open
Gm11346	0.000343115	0.00105398	-6.2252	chr13	24604665	24605065	401	*	5.95399	4.80984	6.74482	-1.71308	2.00975e-07	5.9727e-06	Promoter (<=1kb)	13	24596347	24604925	8579	2	76024	0		Gm11346	X-linked lymphocyte-regulated 5 pseudogene	193385;76024	0;0	chr13:24604665-24605065	Tet_TH0	Open
Gm11346	0.000343115	0.00105398	-6.2252	chr13	24656566	24656966	401	*	4.3481	3.37299	5.07499	-1.46886	1.05362e-05	0.000168444	Intron (ENSMUST00000238974.1/193385, intron 1 of 13)	13	24596347	24604925	8579	2	76024	-51641		Gm11346	X-linked lymphocyte-regulated 5 pseudogene	193385	0	chr13:24656566-24656966	Tet_TH0	Open
Gm11346	0.000343115	0.00105398	-6.2252	chr13	24599504	24599904	401	*	5.37923	4.52984	6.05125	-1.32925	3.01249e-05	0.000408228	Intron (ENSMUST00000238974.1/193385, intron 1 of 13)	13	24596347	24604925	8579	2	76024	5021		Gm11346	X-linked lymphocyte-regulated 5 pseudogene	193385;76024	0;0	chr13:24599504-24599904	Tet_TH0	Open
Pkig	1.84647e-05	6.82091e-05	4.25773																										Tet_TH0
Gemin4	2.30978e-12	1.67839e-11	-6.77745																										Tet_TH0
D730003I15Rik	8.179e-10	4.82624e-09	-5.24474	chr1	191259154	191259554	401	*	4.90805	3.8615	5.66323	-1.58559	6.40835e-07	1.59078e-05	Distal Intergenic	1	191224454	191225835	1382	1	100504360	34700		D730003I15Rik	RIKEN cDNA D730003I15 gene	11910;100504360;66208	0;0;0	chr1:191259154-191259554	Tet_TH0	Open
D730003I15Rik	8.179e-10	4.82624e-09	-5.24474	chr1	191257854	191258254	401	*	3.6444	2.73073	4.34534	-1.38277	0.000308543	0.00282568	Distal Intergenic	1	191224454	191225835	1382	1	100504360	33400		D730003I15Rik	RIKEN cDNA D730003I15 gene	11910;100504360;66208	0;0;0	chr1:191257854-191258254	Tet_TH0	Open
Rapgef3	2.41214e-08	1.24001e-07	9.66349																										Tet_TH0
Cyp2d22	3.60746e-06	1.45909e-05	-6.00731																										Tet_TH0
Epb41l1	6.33991e-07	2.8006e-06	6.0145																										Tet_TH0
Phyhd1	7.36457e-14	5.9772e-13	-6.2978																										Tet_TH0
Prss16	5.72199e-20	6.71654e-19	-11.2548	chr13	22001795	22002195	401	*	4.53561	3.39797	5.32415	-1.6889	5.77422e-07	1.46141e-05	3' UTR	13	22002173	22009742	7570	2	54373	7547	ENSMUSG00000006179	Prss16	protease, serine 16 (thymus)	193452;195236;54373;319168;319184;319158;319167;319183	0;20601;0;0;0;0;0;0	chr13:22001795-22002195	Tet_TH0	Open
Ager	1.96024e-11	1.32253e-10	-4.32297																										Tet_TH0
Ndrg1	1.52444e-18	1.65464e-17	-6.27105																										Tet_TH0
Btk	4.35856e-12	3.09984e-11	8.64112																										Tet_TH0
Gm336	4.70587e-32	9.27454e-31	4.48895																										Tet_TH0
Mettl1	1.21731e-07	5.8263e-07	-4.69987																										Tet_TH0
Ndnf	5.53241e-22	7.09605e-21	7.83623	chr6	65662067	65662467	401	*	4.38001	3.31888	5.14072	-1.59077	5.45477e-06	9.71805e-05	Distal Intergenic	6	65671590	65712326	40737	1	68169	-9123	ENSMUSG00000049001	Ndnf	neuron-derived neurotrophic factor	414084;68169	0;0	chr6:65662067-65662467	Tet_TH0	Open
Gm37039	1.0112e-19	1.17303e-18	25.0461																										Tet_TH0
Il18r1	2.56862e-11	1.71569e-10	-7.91773	chr1	40473702	40474102	401	*	4.2778	3.20619	5.04244	-1.57714	1.27105e-05	0.000196742	Intron (ENSMUST00000167723.7/16182, intron 3 of 9)	1	40465552	40500854	35303	1	16182	8150	ENSMUSG00000026070	Il18r1	interleukin 18 receptor 1	17082;16182;16174	0;0;-41260	chr1:40473702-40474102	Tet_TH0	Open
Gm43636	0.00183041	0.00496747	4.75863																										Tet_TH0
Fcrl5	1.61088e-08	8.44845e-08	13.6862																										Tet_TH0
Gm16386	3.40082e-07	1.55047e-06	7.40738																										Tet_TH0
Ccnd1	1.63943e-05	6.10497e-05	4.24075																										Tet_TH0
Gstm5	3.42506e-08	1.7324e-07	12.7084																										Tet_TH0
Dysf	5.06235e-05	0.000175743	7.32793																										Tet_TH0
H2-Ob	4.4205e-23	6.00383e-22	-6.57472																										Tet_TH0
Zfp385a	1.79743e-07	8.43747e-07	6.28592																										Tet_TH0
Gm29114	1.21e-07	5.79531e-07	12.0204																										Tet_TH0
Gm27186	6.08382e-05	0.000208897	7.28963																										Tet_TH0
Hs6st3	1.20306e-10	7.5934e-10	19.247	chr14	119137591	119137991	401	*	4.53752	5.00703	3.49996	1.33753	0.000154075	0.00158606	Promoter (<=1kb)	14	119138341	119869815	731475	1	50787	-350	ENSMUSG00000053465	Hs6st3	heparan sulfate 6-O-sulfotransferase 3	66435;102635192;50787	0;0;-350	chr14:119137591-119137991	Tet_TH0	Closed
Tgif1	3.46001e-51	1.21089e-49	4.37069																										Tet_TH0
Cyp1a1	1.47268e-09	8.51086e-09	16.3078																										Tet_TH0
Gm37083	0.00108678	0.00307608	5.10407																										Tet_TH0
Ppfibp2	6.39714e-06	2.51062e-05	7.53378	chr7	107659191	107659591	401	*	5.48553	4.6658	6.14356	-1.26655	0.000250815	0.00238367	Intron (ENSMUST00000040056.14/19024, intron 3 of 24)	7	107595207	107748583	153377	1	19024	63984	ENSMUSG00000036528	Ppfibp2	PTPRF interacting protein, binding protein 2 (liprin beta 2)	19024	0	chr7:107659191-107659591	Tet_TH0	Open
4933440M02Rik	1.3617e-08	7.19308e-08	-20.6632																										Tet_TH0
Scin	8.57481e-10	5.04831e-09	17.7174																										Tet_TH0
Ccdc30	1.38614e-15	1.25126e-14	-6.90593																										Tet_TH0
Cadm1	2.47784e-05	8.98211e-05	4.16158	chr9	47739263	47739663	401	*	4.49619	3.19568	5.33778	-1.86054	4.41753e-08	1.68198e-06	Intron (ENSMUST00000114548.7/54725, intron 1 of 9)	9	47530173	47857637	327465	1	54725	209090	ENSMUSG00000032076	Cadm1	cell adhesion molecule 1	54725	0	chr9:47739263-47739663	Tet_TH0	Open
Cadm1	2.47784e-05	8.98211e-05	4.16158	chr9	47734148	47734548	401	*	4.47597	3.35657	5.25805	-1.6597	4.99709e-07	1.29025e-05	Intron (ENSMUST00000114548.7/54725, intron 1 of 9)	9	47530173	47857637	327465	1	54725	203975	ENSMUSG00000032076	Cadm1	cell adhesion molecule 1	54725	0	chr9:47734148-47734548	Tet_TH0	Open
Aif1	2.49564e-05	9.03873e-05	4.24283																										Tet_TH0
Tdgf1	1.67983e-17	1.70974e-16	-6.64293																										Tet_TH0
Sorcs2	3.46685e-18	3.69151e-17	-13.0635																										Tet_TH0
5033430I15Rik	4.48628e-29	7.94401e-28	99.47																										Tet_TH0
Gm16793	3.39101e-06	1.37583e-05	-7.68445	chr8	35628227	35628627	401	*	5.64064	4.00445	6.56997	-2.30336	2.38253e-13	6.40422e-11	Intron (ENSMUST00000037666.5/52065, intron 1 of 2)	8	35582503	35588972	6470	2	100504714	-39255	ENSMUSG00000097357	Gm16793	predicted gene, 16793	100504714;52065	0;0	chr8:35628227-35628627	Tet_TH0	Open
Gm16793	3.39101e-06	1.37583e-05	-7.68445	chr8	35633892	35634292	401	*	5.05131	4.19775	5.72526	-1.35698	1.0445e-05	0.000167208	Intron (ENSMUST00000037666.5/52065, intron 1 of 2)	8	35582503	35588972	6470	2	100504714	-44920	ENSMUSG00000097357	Gm16793	predicted gene, 16793	100504714;52065	0;0	chr8:35633892-35634292	Tet_TH0	Open
Hgf	0.00149528	0.00412485	4.90128																										Tet_TH0
Macc1	1.90902e-05	7.03444e-05	7.95462																										Tet_TH0
Tmem121	0.00138807	0.00385372	4.96514																										Tet_TH0
Gm20425	0.000238328	0.000750991	6.13756																										Tet_TH0
H2-Aa	2.20417e-05	8.05054e-05	5.33351																										Tet_TH0
Gm11695	3.64444e-23	4.97586e-22	-15.2389																										Tet_TH0
Boc	1.14232e-05	4.35304e-05	8.52915																										Tet_TH0
Ighv1-47	5.2095e-07	2.32101e-06	11.2907																										Tet_TH0
B230118H07Rik	6.40599e-06	2.51359e-05	-7.98881																										Tet_TH0
Emilin1	9.03522e-12	6.28167e-11	-6.9843																										Tet_TH0
Gm18604	3.53204e-08	1.7826e-07	-19.2447																										Tet_TH0
Gm44763	1.18387e-05	4.50228e-05	-9.01409																										Tet_TH0
2810468N07Rik	1.39146e-05	5.23607e-05	6.89382																										Tet_TH0
Tlr13	0.000476776	0.00142758	5.1634																										Tet_TH0
Fsd1l	1.38579e-16	1.32654e-15	-17.0541																										Tet_TH0
Tpbg	4.46299e-06	1.78769e-05	9.45505	chr9	86103578	86103978	401	*	3.66947	2.75796	4.36946	-1.32905	0.000432887	0.00375172	Distal Intergenic	9	85842380	85847040	4661	1	21983	261198	ENSMUSG00000035274	Tpbg	trophoblast glycoprotein			chr9:86103578-86103978	Tet_TH0	Open
Nap1l3	1.34027e-11	9.18274e-11	22.7087																										Tet_TH0
Mir155hg	1.72531e-14	1.44843e-13	6.03841																										Tet_TH0
Il18	0.000114077	0.000375367	4.10506																										Tet_TH0
Eml6	2.48457e-10	1.5314e-09	10.1736	chr11	30025945	30026345	401	*	4.42297	4.91428	3.29963	1.38277	0.000161698	0.00165038	Promoter (<=1kb)	11	29743048	30026033	282986	2	237711	0	ENSMUSG00000044072	Eml6	echinoderm microtubule associated protein like 6	237711	0	chr11:30025945-30026345	Tet_TH0	Closed
Eml6	2.48457e-10	1.5314e-09	10.1736	chr11	30126852	30127252	401	*	3.87731	1.92018	4.87004	-2.38627	4.14286e-08	1.59595e-06	Intron (ENSMUST00000006629.13/20742, intron 18 of 35)	11	29743048	30026033	282986	2	237711	-100819	ENSMUSG00000044072	Eml6	echinoderm microtubule associated protein like 6	20742	0	chr11:30126852-30127252	Tet_TH0	Open
Cetn4	3.04568e-06	1.24497e-05	7.45429																										Tet_TH0
AC124397.1	1.27538e-09	7.41605e-09	17.1317																										Tet_TH0
Apc2	9.52755e-10	5.58862e-09	9.07839																										Tet_TH0
Hbb-bs	2.14941e-08	1.1099e-07	6.78913																										Tet_TH0
Igdcc4	8.84321e-17	8.59593e-16	13.1356	chr9	65084438	65084838	401	*	3.5129	4.10638	1.87572	1.71513	9.90548e-05	0.00110494	Intron (ENSMUST00000214559.1/ENSMUST00000214559.1, intron 1 of 4)	9	65101486	65137940	36455	1	56741	-16648	ENSMUSG00000032816	Igdcc4	immunoglobulin superfamily, DCC subclass, member 4	74388;56741	0;-16648	chr9:65084438-65084838	Tet_TH0	Closed
Wipf3	4.14159e-08	2.07559e-07	12.6425																										Tet_TH0
Acvr1c	6.22291e-08	3.06537e-07	-18.1806																										Tet_TH0
Col24a1	1.17896e-16	1.13536e-15	44.1117																										Tet_TH0
H1fx	0.000542871	0.00161011	5.68304																										Tet_TH0
Gpr141	0.00359678	0.00923811	4.15458																										Tet_TH0
Pdgfb	1.32695e-05	5.00967e-05	6.71201																										Tet_TH0
Zdhhc14	4.31605e-18	4.57228e-17	-18.4535	chr17	5491348	5491748	401	*	5.71221	4.76454	6.4277	-1.47845	3.32258e-06	6.40665e-05	Promoter (<=1kb)	17	5492557	5753811	261255	1	224454	-809	ENSMUSG00000034265	Zdhhc14	zinc finger, DHHC domain containing 14	224454	0	chr17:5491348-5491748	Tet_TH0	Open
Gm44521	9.11391e-05	0.000304919	6.87004																										Tet_TH0
Palmd	1.29781e-06	5.55674e-06	8.0213																										Tet_TH0
Gm10640	7.77253e-08	3.79448e-07	-14.2771	chr7	31148080	31148480	401	*	4.00417	3.18047	4.6641	-1.27523	0.000198242	0.00195255	Intron (ENSMUST00000185985.6/52857, intron 1 of 17)	7	31155668	31170641	14974	1	100038516	-7188	ENSMUSG00000100985	Gm10640	predicted gene 10640	15451;20266;52857;100038516	0;0;0;0	chr7:31148080-31148480	Tet_TH0	Open
Ifitm1	0.00188831	0.00510993	4.47289																										Tet_TH0
Glrx	1.22528e-48	4.05556e-47	4.06865																										Tet_TH0
Clec4a3	0.00103142	0.0029258	5.1134																										Tet_TH0
Gm31718	4.25297e-09	2.35302e-08	10.6753																										Tet_TH0
Fhad1	3.59337e-19	4.05951e-18	51.4841																										Tet_TH0
Il17rb	3.35239e-12	2.40651e-11	8.12602																										Tet_TH0
Bcl11a	1.13855e-05	4.34121e-05	7.57802	chr11	24131870	24132270	401	*	4.06603	3.13155	4.77593	-1.38123	0.000116819	0.00126586	Intron (ENSMUST00000000881.12/14025, intron 2 of 4)	11	24078056	24174123	96068	1	14025	53814	ENSMUSG00000000861	Bcl11a	B cell CLL/lymphoma 11A (zinc finger protein)	14025	0	chr11:24131870-24132270	Tet_TH0	Open
Adam8	1.17664e-17	1.20945e-16	4.24195																										Tet_TH0
Gm38699	8.32909e-08	4.05664e-07	8.56451																										Tet_TH0
Src	4.65854e-38	1.13606e-36	29.988																										Tet_TH0
Slc4a4	1.42902e-07	6.78484e-07	-16.9726	chr5	89044840	89045240	401	*	4.70491	2.22877	5.77096	-2.98291	1.29102e-14	5.70059e-12	Intron (ENSMUST00000148750.7/54403, intron 5 of 25)	5	88886818	89239653	352836	1	54403	158022	ENSMUSG00000060961	Slc4a4	solute carrier family 4 (anion exchanger), member 4	54403	0	chr5:89044840-89045240	Tet_TH0	Open
Slc4a4	1.42902e-07	6.78484e-07	-16.9726	chr5	89036185	89036585	401	*	4.59788	2.77369	5.56637	-2.45451	1.63155e-12	3.1426e-10	Intron (ENSMUST00000148750.7/54403, intron 4 of 25)	5	88886818	89239653	352836	1	54403	149367	ENSMUSG00000060961	Slc4a4	solute carrier family 4 (anion exchanger), member 4	54403	0	chr5:89036185-89036585	Tet_TH0	Open
Slc4a4	1.42902e-07	6.78484e-07	-16.9726	chr5	89090105	89090505	401	*	4.96454	3.56749	5.83406	-1.9753	3.97266e-09	2.27852e-07	Intron (ENSMUST00000148750.7/54403, intron 7 of 25)	5	88886818	89239653	352836	1	54403	203287	ENSMUSG00000060961	Slc4a4	solute carrier family 4 (anion exchanger), member 4	54403	0	chr5:89090105-89090505	Tet_TH0	Open
Slc4a4	1.42902e-07	6.78484e-07	-16.9726	chr5	89122894	89123294	401	*	4.28819	2.94829	5.14147	-1.86813	3.09552e-07	8.59718e-06	Intron (ENSMUST00000148750.7/54403, intron 8 of 25)	5	88886818	89239653	352836	1	54403	236076	ENSMUSG00000060961	Slc4a4	solute carrier family 4 (anion exchanger), member 4	54403	0	chr5:89122894-89123294	Tet_TH0	Open
Slc4a4	1.42902e-07	6.78484e-07	-16.9726	chr5	89051596	89051996	401	*	4.04228	2.98224	4.80258	-1.49656	5.16209e-05	0.00064172	Intron (ENSMUST00000148750.7/54403, intron 6 of 25)	5	88886818	89239653	352836	1	54403	164778	ENSMUSG00000060961	Slc4a4	solute carrier family 4 (anion exchanger), member 4	54403	0	chr5:89051596-89051996	Tet_TH0	Open
Gm16702	3.38275e-08	1.71181e-07	12.5681																										Tet_TH0
Rad54l	6.78015e-07	2.98554e-06	4.18006																										Tet_TH0
Cend1	7.61698e-07	3.33633e-06	10.7636																										Tet_TH0
Nid2	9.86558e-08	4.7725e-07	12.708																										Tet_TH0
2810410L24Rik	1.07596e-06	4.64131e-06	-13.4968																										Tet_TH0
Fam229b	1.74538e-08	9.13309e-08	8.30113																										Tet_TH0
Itga10	7.56429e-19	8.37683e-18	-5.88375																										Tet_TH0
Chmp4c	5.03633e-07	2.24869e-06	5.67157																										Tet_TH0
Gm42549	1.75607e-22	2.30075e-21	-4.92523																										Tet_TH0
Gm35037	4.18962e-05	0.000147194	7.60237																										Tet_TH0
Rnf144b	2.70495e-07	1.24746e-06	6.39866																										Tet_TH0
Mir6516	0.00146614	0.00405311	-4.99699	chr11	117092727	117093127	401	*	4.45941	4.94973	3.34011	1.33507	0.000506024	0.0042625	Distal Intergenic	11	117076802	117078954	2153	1	102465258	15925	ENSMUSG00000104740	Mir6516	microRNA 6516	76972;102465258;74136	0;0;0	chr11:117092727-117093127	Tet_TH0	Closed
Xcl1	3.16397e-10	1.93066e-09	18.892	chr1	164975789	164976189	401	*	3.33716	3.96359	1.47471	1.82064	0.000127953	0.00136394	Distal Intergenic	1	164931644	164935527	3884	2	16963	-40262	ENSMUSG00000026573	Xcl1	chemokine (C motif) ligand 1	433374;16963	0;-40262	chr1:164975789-164976189	Tet_TH0	Closed
Gpr15	1.05856e-05	4.05019e-05	5.4745	chr16	58701833	58702233	401	*	5.04905	5.61909	3.55053	1.78729	1.56407e-05	0.000234149	Intron (ENSMUST00000232532.1/ENSMUST00000232532.1, intron 1 of 1)	16	58717433	58719070	1638	2	71223	16837	ENSMUSG00000047293	Gpr15	G protein-coupled receptor 15	12892;71223;224250	31541;0;0	chr16:58701833-58702233	Tet_TH0	Closed
Zfp811	3.58039e-30	6.62245e-29	-5.02406																										Tet_TH0
Fgf2	1.04339e-18	1.14146e-17	17.3935																										Tet_TH0
Samd13	2.14968e-05	7.85843e-05	-9.01402	chr3	146686494	146686894	401	*	3.45727	2.42617	4.20649	-1.40961	0.000412185	0.00360264	Promoter (<=1kb)	3	146645193	146685592	40400	2	75015	-902	ENSMUSG00000048652	Samd13	sterile alpha motif domain containing 13	100286843;75015;18749	44562;-902;0	chr3:146686494-146686894	Tet_TH0	Open
Rpl17-ps9	7.77084e-27	1.25794e-25	-9.82556																										Tet_TH0
Gm37266	4.82507e-12	3.41524e-11	-25.9364																										Tet_TH0
Camsap3	0.000253139	0.000793924	5.25887																										Tet_TH0
Nbea	2.25675e-05	8.22954e-05	6.2357																										Tet_TH0
Ica1	2.97925e-05	0.000106674	7.50476	chr6	8648560	8648960	401	*	4.50971	5.08551	2.97854	1.86897	2.53548e-06	5.0652e-05	Intron (ENSMUST00000156695.7/15893, intron 9 of 10)	6	8630527	8778488	147962	2	15893	129528	ENSMUSG00000062995	Ica1	islet cell autoantigen 1	15893	0	chr6:8648560-8648960	Tet_TH0	Closed
Cttnbp2	7.75322e-36	1.76428e-34	154.367																										Tet_TH0
Gm21887	2.33036e-19	2.66017e-18	-6.35279																										Tet_TH0
Gpr55	2.24448e-58	9.07986e-57	34.944																										Tet_TH0
Pde6a	0.00177508	0.00483226	4.85061	chr18	61302038	61302438	401	*	3.52677	2.15995	4.38781	-1.83734	5.55348e-06	9.85858e-05	Intron (ENSMUST00000075299.12/170826, intron 10 of 11)	18	61220315	61289924	69610	1	225600	81723	ENSMUSG00000024575	Pde6a	phosphodiesterase 6A, cGMP-specific, rod, alpha	225600;170826	0;0	chr18:61302038-61302438	Tet_TH0	Open
Cd36	0.000139099	0.000452962	6.73601																										Tet_TH0
Anxa3	5.17285e-05	0.000179339	6.52948																										Tet_TH0
Frmd4a	7.72004e-14	6.25836e-13	4.09429	chr2	3922777	3923177	401	*	4.29037	2.61485	5.22842	-2.25396	1.08013e-09	7.76554e-08	Distal Intergenic	2	4017717	4614043	596327	1	209630	-94540	ENSMUSG00000026657	Frmd4a	FERM domain containing 4A			chr2:3922777-3923177	Tet_TH0	Open
Frmd4a	7.72004e-14	6.25836e-13	4.09429	chr2	3925250	3925650	401	*	4.43958	2.85749	5.35644	-2.13608	5.66965e-09	3.0663e-07	Distal Intergenic	2	4017717	4614043	596327	1	209630	-92067	ENSMUSG00000026657	Frmd4a	FERM domain containing 4A			chr2:3925250-3925650	Tet_TH0	Open
Frmd4a	7.72004e-14	6.25836e-13	4.09429	chr2	3810394	3810794	401	*	4.74063	3.99057	5.36408	-1.1723	0.000392466	0.00345813	Distal Intergenic	2	4017717	4614043	596327	1	209630	-206923	ENSMUSG00000026657	Frmd4a	FERM domain containing 4A	66540	0	chr2:3810394-3810794	Tet_TH0	Open
Frmd4a	7.72004e-14	6.25836e-13	4.09429	chr2	3800486	3800886	401	*	3.82172	3.02449	4.46886	-1.20427	0.00104382	0.00780027	Distal Intergenic	2	4017717	4614043	596327	1	209630	-216831	ENSMUSG00000026657	Frmd4a	FERM domain containing 4A	66540	0	chr2:3800486-3800886	Tet_TH0	Open
Dnajb13	8.03862e-11	5.14576e-10	4.06827																										Tet_TH0
Kif19a	0.000781625	0.00225889	5.51014																										Tet_TH0
AC154248.1	3.40878e-13	2.64457e-12	27.1663																										Tet_TH0
Adap2	0.00131785	0.00367451	4.30039																										Tet_TH0
Padi3	1.9063e-08	9.91761e-08	-6.59071																										Tet_TH0
Teddm2	0.000125502	0.000411331	-4.58238																										Tet_TH0
9430078K24Rik	3.22751e-11	2.13722e-10	21.3618																										Tet_TH0
Gm37469	0.000163995	0.000528886	-4.36049																										Tet_TH0
Pde5a	2.3732e-05	8.6269e-05	-9.2745																										Tet_TH0
Kcnab3	3.00464e-12	2.16512e-11	4.14387																										Tet_TH0
AC158605.4	1.16124e-20	1.40356e-19	-4.38029																										Tet_TH0
Slc16a9	0.000960779	0.002737	5.32627																										Tet_TH0
Dancr	5.20355e-08	2.58657e-07	-4.15453																										Tet_TH0
Lsr	4.94511e-16	4.57742e-15	8.4339																										Tet_TH0
Rbm11	1.908e-05	7.03191e-05	6.77783																										Tet_TH0
Ky	2.84583e-16	2.68087e-15	40.2887																										Tet_TH0
Trav16n	2.84062e-24	4.0967e-23	7.98798																										Tet_TH0
Sec1	4.85556e-07	2.17406e-06	-15.1753																										Tet_TH0
Ric3	4.4491e-08	2.22594e-07	7.03687																										Tet_TH0
Ppp1r3d	1.4297e-07	6.78497e-07	10.8821																										Tet_TH0
5430427O19Rik	2.09644e-11	1.40938e-10	22.0325																										Tet_TH0
Calhm1	3.35077e-05	0.000119195	7.79765	chr19	47143407	47143807	401	*	3.62359	4.18732	2.15983	1.60651	0.00013203	0.00140077	Promoter (<=1kb)	19	47140909	47144254	3346	2	546729	447	ENSMUSG00000079258	Calhm1	calcium homeostasis modulator 1	102465114;18572;72691;546729;18011	0;0;0;0;-35013	chr19:47143407-47143807	Tet_TH0	Closed
BC026762	1.30315e-09	7.57121e-09	17.1651																										Tet_TH0
Pnmal2	9.58554e-05	0.000319472	6.90569																										Tet_TH0
Gm28942	3.05252e-11	2.02587e-10	8.95442																										Tet_TH0
Cd8a	9.71751e-06	3.73389e-05	-8.11631																										Tet_TH0
Gm29650	8.07904e-45	2.44409e-43	-188.485																										Tet_TH0
Cd24a	6.32356e-06	2.48547e-05	4.94745																										Tet_TH0
Soat2	5.09674e-15	4.44237e-14	23.3674																										Tet_TH0
1700025G04Rik	6.88045e-09	3.73796e-08	-10.3325	chr1	152038068	152038468	401	*	5.08448	2.53819	6.15835	-3.09302	1.46816e-16	1.55535e-13	Intron (ENSMUST00000187603.6/69399, intron 1 of 6)	1	151852403	152090125	237723	2	69399	51657	ENSMUSG00000032666	1700025G04Rik	RIKEN cDNA 1700025G04 gene	69399	0	chr1:152038068-152038468	Tet_TH0	Open
1700025G04Rik	6.88045e-09	3.73796e-08	-10.3325	chr1	152084647	152085047	401	*	5.25903	4.35192	5.9571	-1.41076	1.83547e-05	0.000267768	Intron (ENSMUST00000187603.6/69399, intron 1 of 6)	1	151852403	152090125	237723	2	69399	5078	ENSMUSG00000032666	1700025G04Rik	RIKEN cDNA 1700025G04 gene	69399	0	chr1:152084647-152085047	Tet_TH0	Open
Iglv1	0.000344333	0.0010574	6.35958																										Tet_TH0
Btnl7-ps	1.81357e-14	1.5213e-13	5.8546																										Tet_TH0
Prss2	9.36152e-07	4.06358e-06	6.84186	chr6	41553307	41553707	401	*	5.60855	4.59784	6.34978	-1.53682	5.12282e-06	9.18919e-05	Distal Intergenic	6	41521787	41525079	3293	1	22072	31520	ENSMUSG00000057163	Prss2	protease, serine 2	22072	31520	chr6:41553307-41553707	Tet_TH0	Open
Prss2	9.36152e-07	4.06358e-06	6.84186	chr6	41532650	41533050	401	*	4.97627	4.17988	5.623	-1.25724	6.98039e-05	0.000827062	Distal Intergenic	6	41521787	41525079	3293	1	22072	10863	ENSMUSG00000057163	Prss2	protease, serine 2	22072	10863	chr6:41532650-41533050	Tet_TH0	Open
Zfp503	2.33169e-05	8.48791e-05	-5.59826																										Tet_TH0
Cmklr1	0.000964328	0.00274598	5.31038	chr5	113670602	113671002	401	*	3.45521	1.80292	4.38814	-1.98182	1.17301e-05	0.000183778	Distal Intergenic	5	113612354	113650426	38073	2	14747	-20176	ENSMUSG00000042190	Cmklr1	chemokine-like receptor 1	14747;381707	-20176;53770	chr5:113670602-113671002	Tet_TH0	Open
Gm35065	0.00233001	0.00619772	-4.62349																										Tet_TH0
Sdk1	1.1508e-05	4.38211e-05	8.57624																										Tet_TH0
Pcolce2	1.86917e-05	6.89737e-05	8.23375																										Tet_TH0
Gnao1	0.000426291	0.00128756	5.29266																										Tet_TH0
Mroh8	0.00154587	0.00425371	-5.11695																										Tet_TH0
Plcd1	4.30015e-09	2.37786e-08	16.5438																										Tet_TH0
Tnfrsf1b	5.45267e-90	3.94283e-88	8.52522																										Tet_TH0
Gm12107	6.56761e-15	5.6767e-14	-10.2588																										Tet_TH0
Amotl2	2.42547e-15	2.1511e-14	33.6643																										Tet_TH0
Gm37248	9.28048e-06	3.57258e-05	-10.8547																										Tet_TH0
Xkr5	8.89428e-06	3.43091e-05	6.12399																										Tet_TH0
Pcdhga4	1.6415e-10	1.02516e-09	5.7295																										Tet_TH0
Apobec2	1.49135e-05	5.58765e-05	4.385																										Tet_TH0
Gm20518	3.3182e-09	1.85864e-08	-4.75174																										Tet_TH0
Rnls	9.88039e-09	5.28065e-08	4.83348	chr19	33429454	33429854	401	*	4.71184	3.58206	5.49761	-1.65041	1.99003e-06	4.11712e-05	Distal Intergenic	19	33137747	33392295	254549	2	67795	-37159	ENSMUSG00000071573	Rnls	renalase, FAD-dependent amine oxidase	102465114;67795	0;0	chr19:33429454-33429854	Tet_TH0	Open
Sema6b	0.000982068	0.00279228	5.36276																										Tet_TH0
Agpat4	5.381e-16	4.97425e-15	4.46151																										Tet_TH0
Kcnq4	2.61956e-13	2.04452e-12	28.5921																										Tet_TH0
Tbkbp1	2.39484e-17	2.41497e-16	9.75579																										Tet_TH0
Igkv3-2	1.31001e-06	5.6055e-06	10.7786																										Tet_TH0
Klrg1	2.10103e-27	3.48822e-26	53.0687	chr6	122293812	122294212	401	*	3.55204	4.14322	1.92921	1.72024	0.000107418	0.00118249	Distal Intergenic	6	122270596	122282882	12287	2	50928	-10930	ENSMUSG00000030114	Klrg1	killer cell lectin-like receptor subfamily G, member 1	17835;50928;17113;13619	117797;-10930;0;0	chr6:122293812-122294212	Tet_TH0	Closed
Gm34376	0.000363079	0.00110971	-4.9341																										Tet_TH0
Sh3d21	3.01647e-06	1.23449e-05	4.31887																										Tet_TH0
Gm5538	1.49314e-05	5.59336e-05	-10.3316																										Tet_TH0
Spats2l	9.14862e-11	5.8204e-10	-10.034	chr1	57852553	57852953	401	*	4.43504	2.9533	5.32718	-2.06094	5.40124e-09	2.95216e-07	Intron (ENSMUST00000172287.7/67198, intron 3 of 6)	1	57774162	57948394	174233	1	67198	78391	ENSMUSG00000038305	Spats2l	spermatogenesis associated, serine-rich 2-like	67198	0	chr1:57852553-57852953	Tet_TH0	Open
Spats2l	9.14862e-11	5.8204e-10	-10.034	chr1	57839953	57840353	401	*	4.43282	3.49749	5.14308	-1.38316	6.62903e-05	0.000792732	Intron (ENSMUST00000172287.7/67198, intron 3 of 6)	1	57774162	57948394	174233	1	67198	65791	ENSMUSG00000038305	Spats2l	spermatogenesis associated, serine-rich 2-like	67198	0	chr1:57839953-57840353	Tet_TH0	Open
Snx24	0.000680932	0.00198782	5.58295	chr18	53245385	53245785	401	*	4.41215	4.89243	3.333	1.27908	0.000700365	0.00558725	Promoter (<=1kb)	18	53245662	53390920	145259	1	69226	0	ENSMUSG00000024535	Snx24	sorting nexing 24	67804;69226	0;0	chr18:53245385-53245785	Tet_TH0	Closed
Gm42957	0.000134526	0.000438826	-7.66194																										Tet_TH0
Gm10785	2.86033e-07	1.3159e-06	4.13916																										Tet_TH0
Kmo	7.12673e-05	0.00024202	5.82139																										Tet_TH0
Igkv3-7	0.00021138	0.000672302	6.49639																										Tet_TH0
Rgs11	7.4306e-17	7.26023e-16	-16.7191																										Tet_TH0
Cdk14	0.000217269	0.000689342	6.0227																										Tet_TH0
Ccnb1ip1	2.78054e-07	1.28147e-06	-5.02928																										Tet_TH0
Ntng1	0.000319645	0.000986848	6.29366																										Tet_TH0
Glt8d2	8.7121e-05	0.000291899	-6.00994																										Tet_TH0
Ly6d	0.00035985	0.00110138	6.05618																										Tet_TH0
Cttnbp2nl	0.00170602	0.00465918	4.22401																										Tet_TH0
Pkn3	3.32069e-13	2.57816e-12	5.62888																										Tet_TH0
2810429I04Rik	2.09807e-11	1.41002e-10	5.80047																										Tet_TH0
Chadl	0.00112629	0.00317709	5.2941																										Tet_TH0
Iglc2	1.35406e-09	7.856e-09	8.02492																										Tet_TH0
C230024C17Rik	5.14883e-05	0.000178625	7.74773																										Tet_TH0
Mlf1	7.44077e-10	4.41069e-09	14.8962																										Tet_TH0
Clic5	4.7545e-06	1.89787e-05	-7.65203																										Tet_TH0
Vps37d	2.00943e-06	8.389e-06	10.5019																										Tet_TH0
Il10	1.28942e-69	6.72344e-68	1175.61	chr1	131003323	131003723	401	*	5.06393	5.81168	1.65955	3.17658	1.53873e-11	2.18203e-09	Distal Intergenic	1	131019845	131024974	5130	1	16153	-16122	ENSMUSG00000016529	Il10	interleukin 10	16153;17164	0;0	chr1:131003323-131003723	Tet_TH0	Closed
Il10	1.28942e-69	6.72344e-68	1175.61	chr1	131021459	131021859	401	*	4.52536	5.29025	0.640264	3.18703	1.83971e-09	1.22034e-07	Promoter (1-2kb)	1	131019845	131024974	5130	1	16153	1614	ENSMUSG00000016529	Il10	interleukin 10	16153;17164	0;0	chr1:131021459-131021859	Tet_TH0	Closed
Il10	1.28942e-69	6.72344e-68	1175.61	chr1	131010482	131010882	401	*	4.3309	5.04861	1.50035	2.70537	9.00347e-09	4.51666e-07	Distal Intergenic	1	131019845	131024974	5130	1	16153	-8963	ENSMUSG00000016529	Il10	interleukin 10	16153;17164	0;0	chr1:131010482-131010882	Tet_TH0	Closed
Il10	1.28942e-69	6.72344e-68	1175.61	chr1	130999614	131000014	401	*	3.43183	4.15052	0.585834	2.30973	6.11401e-06	0.000106335	Distal Intergenic	1	131019845	131024974	5130	1	16153	-19831	ENSMUSG00000016529	Il10	interleukin 10	16153	0	chr1:130999614-131000014	Tet_TH0	Closed
Il10	1.28942e-69	6.72344e-68	1175.61	chr1	130993694	130994094	401	*	5.57835	6.08265	4.40074	1.50511	2.82144e-05	0.000386555	Distal Intergenic	1	131019845	131024974	5130	1	16153	-25751	ENSMUSG00000016529	Il10	interleukin 10	16153	0	chr1:130993694-130994094	Tet_TH0	Closed
Il10	1.28942e-69	6.72344e-68	1175.61	chr1	130996403	130996803	401	*	4.39685	5.0289	2.49163	1.90495	9.40547e-05	0.00105801	Distal Intergenic	1	131019845	131024974	5130	1	16153	-23042	ENSMUSG00000016529	Il10	interleukin 10	16153	0	chr1:130996403-130996803	Tet_TH0	Closed
Il10	1.28942e-69	6.72344e-68	1175.61	chr1	131022540	131022940	401	*	4.22731	4.88174	2.13606	1.87349	0.000245923	0.0023446	Exon (ENSMUST00000016673.5/16153, exon 4 of 5)	1	131019845	131024974	5130	1	16153	2695	ENSMUSG00000016529	Il10	interleukin 10	16153;17164	0;0	chr1:131022540-131022940	Tet_TH0	Closed
Il10	1.28942e-69	6.72344e-68	1175.61	chr1	131053186	131053586	401	*	4.05807	4.49122	3.15056	1.21772	0.0010703	0.00796015	Distal Intergenic	1	131019845	131024974	5130	1	16153	33341	ENSMUSG00000016529	Il10	interleukin 10	16153;17164	0;0	chr1:131053186-131053586	Tet_TH0	Closed
Dock1	9.50918e-07	4.12422e-06	10.0615																										Tet_TH0
Thsd1	2.8652e-06	1.17582e-05	-4.86424	chr8	22228652	22229052	401	*	3.69843	2.82142	4.3831	-1.24195	0.00126168	0.00910894	Promoter (1-2kb)	8	22227313	22261334	34022	1	56229	1339	ENSMUSG00000031480	Thsd1	thrombospondin, type I, domain 1	80986;70160;56229	0;0;0	chr8:22228652-22229052	Tet_TH0	Open
Filip1	8.69822e-10	5.11517e-09	6.29078	chr9	79919216	79919616	401	*	4.17882	3.36384	4.83458	-1.19491	0.000764862	0.00601172	Intron (ENSMUST00000239133.1/70598, intron 1 of 6)	9	79805094	80012851	207758	2	70598	93235	ENSMUSG00000034898	Filip1	filamin A interacting protein 1	70598	0	chr9:79919216-79919616	Tet_TH0	Open
Exosc6	5.63464e-06	2.22862e-05	-11.8869																										Tet_TH0
Plac8	7.00768e-09	3.8031e-08	7.77859																										Tet_TH0
CT010505.3	1.91013e-05	7.03604e-05	-6.30936																										Tet_TH0
Scamp5	0.000956425	0.00272609	5.17034																										Tet_TH0
Gm11944	2.46096e-07	1.14205e-06	-6.98767	chr11	3313246	3313646	401	*	3.65221	2.67265	4.38092	-1.40972	0.000304253	0.00279275	Intron (ENSMUST00000152576.1/100302648, intron 3 of 5)	11	3308996	3320722	11727	1	100302648	4250	ENSMUSG00000084941	Gm11944	predicted gene 11944	13494;56218;100302648;216505;16886	0;0;0;0;0	chr11:3313246-3313646	Tet_TH0	Open
Akr1e1	5.11532e-06	2.03485e-05	5.65352																										Tet_TH0
2610037D02Rik	8.53911e-15	7.31375e-14	-6.74403																										Tet_TH0
Dio2	6.1286e-05	0.00021033	7.41009																										Tet_TH0
Gm42890	1.13654e-09	6.63291e-09	-7.26513																										Tet_TH0
Nek6	5.25686e-14	4.29679e-13	16.3327	chr2	38536341	38536741	401	*	5.2529	5.73179	4.17921	1.38434	0.000122005	0.00131257	Intron (ENSMUST00000054234.9/59126, intron 1 of 9)	2	38511643	38594606	82964	1	59126	24698	ENSMUSG00000026749	Nek6	NIMA (never in mitosis gene a)-related expressed kinase 6	59126	0	chr2:38536341-38536741	Tet_TH0	Closed
Trbv3	3.12868e-43	9.11932e-42	5.42741																										Tet_TH0
Akr1b8	1.33594e-05	5.03994e-05	8.7309																										Tet_TH0
Jchain	1.68478e-14	1.41556e-13	24.5026																										Tet_TH0
Flywch2	2.54266e-08	1.30291e-07	8.88704																										Tet_TH0
Gm15848	0.00118302	0.00331999	5.21744																										Tet_TH0
Gm44037	5.04607e-12	3.56922e-11	-4.3832																										Tet_TH0
AC124601.2	8.61463e-06	3.33109e-05	8.0198																										Tet_TH0
Ccdc114	2.89036e-07	1.32913e-06	-7.21401																										Tet_TH0
Trpc1	8.11331e-05	0.000273115	7.1797	chr9	95750160	95750560	401	*	4.76455	5.15664	3.98763	1.10459	0.000729559	0.0057932	Promoter (<=1kb)	9	95705082	95750358	45277	2	22063	0	ENSMUSG00000032839	Trpc1	transient receptor potential cation channel, subfamily C, member 1	22063;102502	0;0	chr9:95750160-95750560	Tet_TH0	Closed
Gm14005	9.24433e-12	6.4206e-11	24.3023																										Tet_TH0
AC151971.6	1.13648e-16	1.09496e-15	-4.50395																										Tet_TH0
Abcb11	9.84683e-06	3.78148e-05	-11.1081																										Tet_TH0
Cdr2l	5.06052e-10	3.03121e-09	-5.66343																										Tet_TH0
Gm8075	0.00336948	0.0087006	4.4172																										Tet_TH0
Cdkn2a	6.78669e-09	3.68895e-08	16.2894																										Tet_TH0
Prr5l	4.55236e-07	2.04447e-06	11.5479																										Tet_TH0
Tnp2	0.000148181	0.000480574	6.88																										Tet_TH0
Gm4989	9.39133e-05	0.000313493	6.16644																										Tet_TH0
Tubb2a-ps2	3.39717e-06	1.37806e-05	4.97028																										Tet_TH0
Ankrd13b	1.80257e-40	4.72332e-39	-4.00038																										Tet_TH0
2210417A02Rik	2.38005e-06	9.86484e-06	8.52861																										Tet_TH0
Gm39307	1.60923e-05	5.999e-05	4.65644																										Tet_TH0
Btc	9.60765e-05	0.000319993	-5.43196																										Tet_TH0
Ighg2b	1.73266e-13	1.36826e-12	30.6951																										Tet_TH0
BC026585	6.90165e-23	9.24064e-22	9.45172																										Tet_TH0
Hba-a2	4.7245e-07	2.11674e-06	6.53587																										Tet_TH0
Bach2it1	0.00345836	0.00891571	-4.68615																										Tet_TH0
Cdkn3	0.0012019	0.00336796	4.34147																										Tet_TH0
Slco2a1	2.95613e-11	1.96504e-10	19.0351																										Tet_TH0
Bcl2a1c	2.10721e-05	7.71404e-05	7.01554																										Tet_TH0
Ypel4	0.0022958	0.00611379	4.7254																										Tet_TH0
Myadm	4.43177e-05	0.000155123	4.06045	chr7	3290142	3290542	401	*	4.02377	4.62959	2.30691	1.90715	4.06494e-06	7.55495e-05	Promoter (1-2kb)	7	3289080	3304311	15232	1	50918	1062	ENSMUSG00000068566	Myadm	myeloid-associated differentiation marker	378425;50918;18752;81904	-40402;0;-12980;-42413	chr7:3290142-3290542	Tet_TH0	Closed
Mlkl	3.22497e-05	0.000115016	5.1716																										Tet_TH0
Dlg2	2.53896e-33	5.22728e-32	87.323																										Tet_TH0
Soga1	0.000918099	0.00262471	4.86645																										Tet_TH0
Yes1	4.04522e-08	2.02975e-07	-7.61616																										Tet_TH0
AC134254.3	1.04867e-08	5.59031e-08	6.04095																										Tet_TH0
Atp8a2	5.33918e-06	2.11741e-05	-4.02582	chr14	60117914	60118314	401	*	4.52191	2.34183	5.54986	-2.67025	8.17217e-12	1.242e-09	Intron (ENSMUST00000131670.2/50769, intron 1 of 6)	14	59638540	60197179	558640	2	50769	78865	ENSMUSG00000021983	Atp8a2	ATPase, aminophospholipid transporter-like, class I, type 8A, member 2	50769	0	chr14:60117914-60118314	Tet_TH0	Open
Atp8a2	5.33918e-06	2.11741e-05	-4.02582	chr14	60129513	60129913	401	*	5.63051	3.94658	6.57038	-2.29475	6.21519e-11	7.08434e-09	Intron (ENSMUST00000131670.2/50769, intron 1 of 6)	14	59638540	60197179	558640	2	50769	67266	ENSMUSG00000021983	Atp8a2	ATPase, aminophospholipid transporter-like, class I, type 8A, member 2	50769	0	chr14:60129513-60129913	Tet_TH0	Open
Atp8a2	5.33918e-06	2.11741e-05	-4.02582	chr14	60072586	60072986	401	*	3.8108	1.79848	4.81284	-2.37603	3.53373e-08	1.39563e-06	Intron (ENSMUST00000080368.12/50769, intron 1 of 35)	14	59638540	60197179	558640	2	50769	124193	ENSMUSG00000021983	Atp8a2	ATPase, aminophospholipid transporter-like, class I, type 8A, member 2	50769	0	chr14:60072586-60072986	Tet_TH0	Open
Atp8a2	5.33918e-06	2.11741e-05	-4.02582	chr14	60131468	60131868	401	*	4.93841	3.96671	5.6639	-1.46496	1.5212e-05	0.000228396	Intron (ENSMUST00000131670.2/50769, intron 1 of 6)	14	59638540	60197179	558640	2	50769	65311	ENSMUSG00000021983	Atp8a2	ATPase, aminophospholipid transporter-like, class I, type 8A, member 2	50769	0	chr14:60131468-60131868	Tet_TH0	Open
Acy3	0.00209921	0.00563802	4.96102																										Tet_TH0
Gm20735	1.74217e-05	6.45975e-05	-10.3981																										Tet_TH0
Lif	2.92308e-06	1.19839e-05	5.1278																										Tet_TH0
Ang	7.52138e-08	3.67706e-07	13.7141																										Tet_TH0
0610031O16Rik	0.000137276	0.000447375	-6.95532																										Tet_TH0
Gm17259	8.29027e-05	0.00027853	-4.56191																										Tet_TH0
Lman1l	0.00035501	0.0010881	-5.73002																										Tet_TH0
Shisa6	3.25516e-12	2.34157e-11	25.874																										Tet_TH0
Nrip3	2.9951e-05	0.000107205	-7.45978																										Tet_TH0
Fxyd6	2.40632e-16	2.27303e-15	40.213																										Tet_TH0
Ccdc122	0.000220185	0.000698273	4.06772																										Tet_TH0
Gen1	8.07847e-12	5.63348e-11	-4.25755																										Tet_TH0
Ly6c2	0.00143773	0.003982	-5.19305	chr15	75116519	75116919	401	*	5.24846	4.59771	5.81802	-1.0753	0.000191907	0.00190579	Distal Intergenic	15	75108158	75111970	3813	2	100041546	-4549	ENSMUSG00000022584	Ly6c2	lymphocyte antigen 6 complex, locus C2	100041546;546644	-4549;-38321	chr15:75116519-75116919	Tet_TH0	Open
Apbb1	8.79018e-07	3.82361e-06	5.55679																										Tet_TH0
Zfp939	5.59612e-06	2.21465e-05	9.4841																										Tet_TH0
Myo6	1.62446e-06	6.88009e-06	-4.01215	chr9	80266491	80266891	401	*	4.51003	3.66656	5.1793	-1.28122	0.000261857	0.00246391	Exon (ENSMUST00000130496.1/17920, exon 3 of 3)	9	80165031	80311729	146699	1	17920	101460	ENSMUSG00000033577	Myo6	myosin VI	17920;63859	0;198590	chr9:80266491-80266891	Tet_TH0	Open
Gm27861	2.6055e-05	9.4071e-05	-9.91325																										Tet_TH0
Gm43820	1.65912e-12	1.21882e-11	13.5669																										Tet_TH0
Lynx1	3.17794e-05	0.000113456	-6.58236																										Tet_TH0
St14	3.73316e-22	4.83309e-21	5.88033																										Tet_TH0
Jhy	9.20285e-05	0.000307795	-5.6045																										Tet_TH0
Rhob	7.20278e-19	7.98928e-18	10.1629	chr12	8496330	8496730	401	*	4.1443	3.38502	4.77248	-1.17213	0.000542437	0.0045133	Distal Intergenic	12	8497661	8500009	2349	2	11852	3279	ENSMUSG00000054364	Rhob	ras homolog family member B	11852;328059	0;0	chr12:8496330-8496730	Tet_TH0	Open
Lrrc32	3.06579e-13	2.38472e-12	-5.93722																										Tet_TH0
A130014A01Rik	1.23126e-11	8.46104e-11	-5.06008																										Tet_TH0
Hic1	7.24082e-08	3.54742e-07	4.78114																										Tet_TH0
Atg4c	1.5617e-11	1.06123e-10	-8.32124																										Tet_TH0
BC048644	0.00146266	0.00404513	-5.04489																										Tet_TH0
Gm43064	1.19125e-07	5.71077e-07	4.85808																										Tet_TH0
Runx2os1	2.06643e-10	1.28167e-09	19.7535																										Tet_TH0
Tubal3	0.000184768	0.000592474	-7.65651																										Tet_TH0
Gm35035	6.49078e-05	0.000221807	-6.95704																										Tet_TH0
Gm28151	6.97471e-07	3.0673e-06	-6.61458																										Tet_TH0
Igkv10-96	2.16771e-11	1.45352e-10	21.8224																										Tet_TH0
Cdhr4	2.48346e-06	1.02688e-05	-10.2846																										Tet_TH0
Dusp1	1.41002e-40	3.69939e-39	19.0976	chr17	26594194	26594594	401	*	3.54169	2.33284	4.3544	-1.60299	0.000115038	0.00125221	Intron (ENSMUST00000167662.7/67458, intron 1 of 9)	17	26505590	26562128	56539	2	19252	-32066	ENSMUSG00000024190	Dusp1	dual specificity phosphatase 1	19252;67458	0;0	chr17:26594194-26594594	Tet_TH0	Open
Cdh5	1.88023e-07	8.80226e-07	-13.0646	chr8	103979006	103979406	401	*	5.75725	4.02635	6.70708	-2.35336	5.68537e-12	9.26613e-10	Distal Intergenic	8	104101625	104144511	42887	1	12562	-122219	ENSMUSG00000031871	Cdh5	cadherin 5			chr8:103979006-103979406	Tet_TH0	Open
Slc3a1	3.21613e-07	1.47079e-06	-4.96921	chr17	85023597	85023997	401	*	5.02596	4.02163	5.76465	-1.52842	1.37382e-06	3.0173e-05	3' UTR	17	85028376	85064236	35861	1	20532	-4379	ENSMUSG00000024131	Slc3a1	solute carrier family 3, member 1	19043;20532;213760	0;-4379;66244	chr17:85023597-85023997	Tet_TH0	Open
Glp1r	1.35354e-18	1.47299e-17	52.3124																										Tet_TH0
Neto2	1.40349e-07	6.66819e-07	-4.17389																										Tet_TH0
Alpl	0.000596263	0.00175621	5.32313																										Tet_TH0
Gm44949	0.000428771	0.0012943	-5.41722																										Tet_TH0
Grifin	0.0014332	0.00397157	-4.78583																										Tet_TH0
AC156802.1	4.27198e-11	2.79497e-10	22.0438																										Tet_TH0
A530021J07Rik	0.000705885	0.00205517	-6.29734																										Tet_TH0
Gm12259	3.73402e-05	0.000131901	-5.10441																										Tet_TH0
Marco	4.02917e-06	1.62301e-05	6.91061																										Tet_TH0
F2rl2	2.69679e-07	1.24398e-06	5.00336	chr13	95712912	95713312	401	*	4.96849	3.5985	5.83043	-1.99328	1.54823e-10	1.51126e-08	Intron (ENSMUST00000238396.1/ENSMUST00000238396.1, intron 2 of 2)	13	95696853	95702739	5887	1	14064	16059	ENSMUSG00000021675	F2rl2	coagulation factor II (thrombin) receptor-like 2	544963;14064	0;0	chr13:95712912-95713312	Tet_TH0	Open
Adamts20	6.34841e-07	2.80376e-06	10.0873	chr15	94255087	94255487	401	*	5.31083	3.47649	6.28127	-2.5063	4.83193e-15	2.5493e-12	Distal Intergenic	15	94270163	94465418	195256	2	223838	209931	ENSMUSG00000022449	Adamts20	a disintegrin-like and metallopeptidase (reprolysin type) with thrombospondin type 1 motif, 20	223838	0	chr15:94255087-94255487	Tet_TH0	Open
Adamts20	6.34841e-07	2.80376e-06	10.0873	chr15	94276390	94276790	401	*	4.29939	2.59964	5.24266	-2.28019	5.36151e-10	4.31063e-08	Intron (ENSMUST00000035342.10/223838, intron 37 of 38)	15	94270163	94465418	195256	2	223838	188628	ENSMUSG00000022449	Adamts20	a disintegrin-like and metallopeptidase (reprolysin type) with thrombospondin type 1 motif, 20	223838	0	chr15:94276390-94276790	Tet_TH0	Open
Adamts20	6.34841e-07	2.80376e-06	10.0873	chr15	94220732	94221132	401	*	3.73576	2.56832	4.53461	-1.61961	3.57748e-05	0.000470453	Distal Intergenic	15	94270163	94465418	195256	2	223838	244286	ENSMUSG00000022449	Adamts20	a disintegrin-like and metallopeptidase (reprolysin type) with thrombospondin type 1 motif, 20	223838	0	chr15:94220732-94221132	Tet_TH0	Open
Adamts20	6.34841e-07	2.80376e-06	10.0873	chr15	94214426	94214826	401	*	4.11406	3.20131	4.81459	-1.36179	7.36385e-05	0.000863407	Distal Intergenic	15	94270163	94465418	195256	2	223838	250592	ENSMUSG00000022449	Adamts20	a disintegrin-like and metallopeptidase (reprolysin type) with thrombospondin type 1 motif, 20			chr15:94214426-94214826	Tet_TH0	Open
Adamts20	6.34841e-07	2.80376e-06	10.0873	chr15	94231275	94231675	401	*	3.37074	2.30374	4.13366	-1.39515	0.000699999	0.00558557	Distal Intergenic	15	94270163	94465418	195256	2	223838	233743	ENSMUSG00000022449	Adamts20	a disintegrin-like and metallopeptidase (reprolysin type) with thrombospondin type 1 motif, 20	223838	0	chr15:94231275-94231675	Tet_TH0	Open
Cib2	0.000779622	0.00225341	5.32722																										Tet_TH0
Mro	0.000321989	0.000993788	-7.10705																										Tet_TH0
Chdh	1.09313e-14	9.28605e-14	6.23766	chr14	30184676	30185076	401	*	3.30846	3.8701	1.856	1.5005	0.000539979	0.00449595	Intron (ENSMUST00000112250.5/12289, intron 4 of 46)	14	30009023	30040527	31505	1	218865	175653	ENSMUSG00000015970	Chdh	choline dehydrogenase	12289	0	chr14:30184676-30185076	Tet_TH0	Closed
Chdh	1.09313e-14	9.28605e-14	6.23766	chr14	30024333	30024733	401	*	4.19195	2.93454	5.02026	-1.79644	7.48242e-07	1.81733e-05	Intron (ENSMUST00000067620.11/218865, intron 1 of 7)	14	30009023	30040527	31505	1	218865	15310	ENSMUSG00000015970	Chdh	choline dehydrogenase	80795;56249;102466209;50905;218865;12289	0;0;35445;0;0;0	chr14:30024333-30024733	Tet_TH0	Open
Chdh	1.09313e-14	9.28605e-14	6.23766	chr14	30137980	30138380	401	*	3.43105	2.1869	4.25517	-1.69653	4.02976e-05	0.000519313	Intron (ENSMUST00000112250.5/12289, intron 9 of 46)	14	30009023	30040527	31505	1	218865	128957	ENSMUSG00000015970	Chdh	choline dehydrogenase	12289	0	chr14:30137980-30138380	Tet_TH0	Open
Gm30414	0.00306543	0.00796815	-4.97656																										Tet_TH0
AC122428.3	0.000317367	0.000980108	-5.74454																										Tet_TH0
Pcdhgb2	2.04406e-06	8.52671e-06	4.61063																										Tet_TH0
Prrg1	1.09356e-41	2.99796e-40	-6.65305																										Tet_TH0
Gm26669	2.22104e-19	2.53958e-18	10.509																										Tet_TH0
Gm43062	0.000325009	0.00100222	-4.04106																										Tet_TH0
BC023105	4.1174e-06	1.65598e-05	4.80403																										Tet_TH0
Hecw2	0.000368185	0.00112334	6.30895																										Tet_TH0
Vwa7	7.59009e-06	2.95585e-05	-10.4175																										Tet_TH0
Gm16072	0.00135092	0.00375862	5.22053																										Tet_TH0
Tktl1	1.21098e-05	4.59696e-05	9.31253																										Tet_TH0
Dnah10	0.000334645	0.00102918	-5.77071																										Tet_TH0
Acoxl	1.51356e-05	5.66606e-05	-10.5423	chr2	127927643	127928043	401	*	4.31844	3.40675	5.01851	-1.41122	1.28021e-05	0.000197905	Intron (ENSMUST00000028859.7/74121, intron 9 of 17)	2	127838876	128123873	284998	1	74121	88767	ENSMUSG00000027380	Acoxl	acyl-Coenzyme A oxidase-like	74121	0	chr2:127927643-127928043	Tet_TH0	Open
Psrc1	4.96664e-06	1.97836e-05	4.56279																										Tet_TH0
Kdm5d	2.64603e-196	7.2254e-194	-964.086																										Tet_TH0
Plxdc2	2.91731e-07	1.34033e-06	10.0941																										Tet_TH0
Tspan2	4.03821e-06	1.6257e-05	5.04284	chr3	102701884	102702284	401	*	4.01135	3.29352	4.61794	-1.11171	0.000971212	0.00735072	Distal Intergenic	3	102734529	102801513	66985	1	70747	-32245	ENSMUSG00000027858	Tspan2	tetraspanin 2	78491;70747	0;0	chr3:102701884-102702284	Tet_TH0	Open
Airn	2.32028e-12	1.68543e-11	-7.90188	chr17	12745793	12746193	401	*	4.33829	3.28508	5.096	-1.64655	7.63819e-07	1.84892e-05	Intron (ENSMUST00000160932.2/104103, intron 1 of 2)	17	12741311	12860136	118826	1	104103	4482	ENSMUSG00000078247	Airn	antisense Igf2r RNA	16004;104103	0;0	chr17:12745793-12746193	Tet_TH0	Open
Gm20560	5.16387e-10	3.08746e-09	-9.60498																										Tet_TH0
B230317F23Rik	0.000104903	0.000347218	-8.27616																										Tet_TH0
Gm37174	3.9316e-07	1.77959e-06	-4.51354																										Tet_TH0
Anks6	1.3952e-05	5.24921e-05	8.98412																										Tet_TH0
4933425D22Rik	0.000248773	0.00078141	6.63108																										Tet_TH0
D630023O14Rik	0.0014539	0.0040225	-5.67022																										Tet_TH0
Nxpe4	1.39896e-08	7.38366e-08	7.84272	chr9	47892987	47893387	401	*	4.23074	3.50836	4.83975	-1.09122	0.00138275	0.00981189	Distal Intergenic	9	48162023	48400025	238003	1	244853	-268636	ENSMUSG00000044229	Nxpe4	neurexophilin and PC-esterase domain family, member 4	54725	0	chr9:47892987-47893387	Tet_TH0	Open
Gm15672	5.13961e-09	2.82026e-08	-6.71352																										Tet_TH0
Prss53	5.85929e-06	2.31351e-05	-4.38536																										Tet_TH0
Sdc1	0.00382166	0.00976254	4.63137																										Tet_TH0
Edn3	9.8619e-21	1.19687e-19	76.2883	chr2	174723337	174723737	401	*	3.6925	4.19107	2.53918	1.47111	0.000380908	0.00337347	Distal Intergenic	2	174760619	174784042	23424	1	13616	-36882	ENSMUSG00000027524	Edn3	endothelin 3	100043757;13616	0;-36882	chr2:174723337-174723737	Tet_TH0	Closed
Gm37472	3.29408e-12	2.36711e-11	10.7374																										Tet_TH0
2610042L04Rik	0.00161339	0.00442541	5.28349																										Tet_TH0
Apol11b	0.000364891	0.00111444	6.29822																										Tet_TH0
Teddm3	3.22621e-08	1.63461e-07	-17.7924																										Tet_TH0
Ptk7	0.00127684	0.00356733	5.14274																										Tet_TH0
A530010L16Rik	2.26044e-05	8.24154e-05	5.0071																										Tet_TH0
Igfbp7	7.67981e-31	1.45419e-29	89.9082	chr5	77372792	77373192	401	*	4.05975	4.56255	2.88855	1.4118	0.000434243	0.00376076	Intron (ENSMUST00000046746.9/29817, intron 1 of 4)	5	77349240	77408041	58802	2	29817	34849	ENSMUSG00000036256	Igfbp7	insulin-like growth factor binding protein 7	231329;29817	0;0	chr5:77372792-77373192	Tet_TH0	Closed
Gm37962	0.000539633	0.00160215	-4.59016																										Tet_TH0
Gm19325	0.00164139	0.00449567	-5.5729																										Tet_TH0
Syn1	0.00256749	0.00676869	4.87168																										Tet_TH0
Gm6740	0.000251663	0.00078963	4.04837																										Tet_TH0
Gm6755	0.000251663	0.00078963	4.04837																										Tet_TH0
Iqcd	5.84058e-12	4.11298e-11	-15.3558																										Tet_TH0
Tnfsf4	3.1264e-17	3.12083e-16	25.6863	chr1	161378570	161378970	401	*	3.31273	3.91591	1.61331	1.69437	0.000214066	0.00208272	Distal Intergenic	1	161395409	161418410	23002	1	22164	-16439	ENSMUSG00000026700	Tnfsf4	tumor necrosis factor (ligand) superfamily, member 4	22164	0	chr1:161378570-161378970	Tet_TH0	Closed
Egr4	0.000107809	0.000356029	7.15262	chr6	85513544	85513944	401	*	4.34162	4.9393	2.67791	1.8322	8.03302e-06	0.000134079	Promoter (<=1kb)	6	85511121	85513589	2469	2	13656	0	ENSMUSG00000071341	Egr4	early growth response 4	12468;330369;13656	0;0;0	chr6:85513544-85513944	Tet_TH0	Closed
1110002J07Rik	3.81986e-08	1.92085e-07	13.1214																										Tet_TH0
Gm16200	1.4229e-05	5.34761e-05	7.67995																										Tet_TH0
Rad51b	0.00027958	0.000871453	4.24664	chr12	79600292	79600692	401	*	3.75089	4.418	1.54103	1.66655	0.00109911	0.00813578	Intron (ENSMUST00000171210.2/19363, intron 7 of 10)	12	79297282	79814690	517409	1	19363	303010	ENSMUSG00000059060	Rad51b	RAD51 paralog B	19363	0	chr12:79600292-79600692	Tet_TH0	Closed
Mamdc4	2.83581e-19	3.22297e-18	-4.26361																										Tet_TH0
Sdcbp2	5.57853e-59	2.3062e-57	11.8584	chr2	151569560	151569960	401	*	4.4421	5.07225	2.55149	1.8757	0.000143242	0.00149613	Distal Intergenic	2	151572622	151590005	17384	1	228765	-2662	ENSMUSG00000027456	Sdcbp2	syndecan binding protein (syntenin) 2	14225;228765;241727	0;0;0	chr2:151569560-151569960	Tet_TH0	Closed
Rab6b	7.37809e-09	3.99785e-08	7.81824																										Tet_TH0
9330179D12Rik	6.47108e-10	3.8546e-09	6.83683																										Tet_TH0
Gm7468	6.19823e-05	0.000212474	7.66889																										Tet_TH0
Ccnjl	0.00112385	0.00317108	-5.92486																										Tet_TH0
P2ry12	0.00243457	0.00644446	4.62784	chr3	59260719	59261119	401	*	5.91078	5.12166	6.55393	-1.26771	0.000100604	0.00111979	Promoter (1-2kb)	3	59216272	59262871	46600	2	70839	1752	ENSMUSG00000036353	P2ry12	purinergic receptor P2Y, G-protein coupled 12	329650;74191;70839	0;-49837;0	chr3:59260719-59261119	Tet_TH0	Open
Chil5	3.49372e-05	0.000123962	-6.26301	chr3	106032766	106033166	401	*	3.73822	2.0558	4.67777	-2.16271	1.10029e-07	3.60942e-06	Promoter (<=1kb)	3	106016919	106032814	15896	2	229687	0	ENSMUSG00000043873	Chil5	chitinase-like 5	70465;12659;100503311;229687	0;66651;0;0	chr3:106032766-106033166	Tet_TH0	Open
[truncated: 5,391 more rows]
