# Supplementary material for: T-follicular helper cells are epigenetically poised to transdifferentiate into T-regulatory type 1 cells
Source: eLife. 2024 Nov 22;13:RP97665. doi: 10.7554/eLife.97665 (PMC11584177; doi:10.7554/eLife.97665)
Supplement: Figure 2—source data 2. — Also includes the count of differentially expressed genes and those overlapping with genes linked to differentially accessible regions in these cell types. [file elife-97665-fig2-data2.xlsx]

## Sheet: Sheet1
Comparison	OCR_Bulk_ATAC	Genes_associated_OCR	DE_genes_UP	Overlapping_genes_UP	DE_genes_DOWN	Overlapping_genes_DOWN
Tet+_vs_TH0	821	621	1576	156	512	4
Ag-induced_TFH_vs_TH0	10919	6059	1828	871	667	94
