# Supplementary material for: T-follicular helper cells are epigenetically poised to transdifferentiate into T-regulatory type 1 cells
Source: eLife. 2024 Nov 22;13:RP97665. doi: 10.7554/eLife.97665 (PMC11584177; doi:10.7554/eLife.97665)
Supplement: Figure 3—source data 1. [file elife-97665-fig3-data1.xlsx]

## Sheet: H3K27Ac
Sample.name	Chromosome	Start	End	Length	Absolute.summit	Pileup	X.log10.pvalue.	Fold.enrichment	X.log10.qvalue.	Peak.name	Gene.IDs	Transcript.IDs	Strand	Transcript.start	Transcript.end	Gene.section	Distance.to.TSS	Distance.to.TTS	X..transcript.overlap	X..peak.overlap	ccdsid	gene_id	gene_name	gene_type	havana_gene	havana_transcript	level	ont	protein_id	transcript_name	transcript_support_level	transcript_type
TetK27	chr1	4784885	4786378	1493	4785548	155	189.757	33.5588	186.625	TetK27_peak_1	Mrpl15	ENSMUST00000146665.2	-	4781221	4785740	TSS	0	-3664	0.189381	0.572959	---	ENSMUSG00000033845.13	Mrpl15	protein_coding	OTTMUSG00000029329.1	OTTMUST00000072662.1	2	---	ENSMUSP00000141204.1	Mrpl15-205	1	protein_coding
TetK27	chr1	4807225	4808490	1265	4807970	197	194.166	21.8168	191.009	TetK27_peak_2	Lypla1	ENSMUST00000137887.7	+	4807898	4840970	TSS	0	-32480	0.017930	0.468404	---	ENSMUSG00000025903.14	Lypla1	protein_coding	OTTMUSG00000021562.1	OTTMUST00000051168.1	2	---	ENSMUSP00000119456.1	Lypla1-206	5	protein_coding
TetK27	chr1	4857191	4859053	1862	4857987	187	204.763	27.1594	201.548	TetK27_peak_3	Tcea1	ENSMUST00000081551.13	+	4857814	4897906	TSS	0	-38853	0.030928	0.665593	CCDS35505.1	ENSMUSG00000033813.15	Tcea1	protein_coding	OTTMUSG00000042348.1	OTTMUST00000111602.1	2	---	ENSMUSP00000080266.7	Tcea1-201	1	protein_coding
TetK27	chr1	5000802	5001509	707	5001153	63	62.6861	17.3143	60.2474	TetK27_peak_4	Rgs20	ENSMUST00000119256.7	-	4910402	5018736	5' UTR Exon	17227	-90400	0.006535	1.000000	CCDS69859.1	ENSMUSG00000002459.17	Rgs20	protein_coding	OTTMUSG00000029338.1	OTTMUST00000072706.1	2	---	ENSMUSP00000113324.1	Rgs20-203	3	protein_coding
TetK27	chr1	5018580	5020758	2178	5019515	33	20.4674	7.12996	18.3886	TetK27_peak_5	Rgs20	ENSMUST00000156289.1	-	4922528	5019380	TSS	0	-96052	0.008270	0.367600	---	ENSMUSG00000002459.17	Rgs20	protein_coding	OTTMUSG00000029338.1	OTTMUST00000072707.1	2	---	---	Rgs20-206	1	retained_intron
TetK27	chr1	5082567	5083756	1189	5083297	217	259.627	34.1493	256.086	TetK27_peak_6	Atp6v1h	ENSMUST00000192698.2	+	5083154	5162420	TSS	0	-78664	0.007607	0.506723	CCDS78541.1	ENSMUSG00000033793.12	Atp6v1h	protein_coding	OTTMUSG00000050145.1	OTTMUST00000127529.1	2	---	ENSMUSP00000141797.1	Atp6v1h-204	5	protein_coding
TetK27	chr1	6213798	6215753	1955	6214757	294	388.273	46.0559	383.637	TetK27_peak_7	Rb1cc1	ENSMUST00000027040.12	+	6214645	6276649	TSS	0	-60896	0.017886	0.566973	CCDS35507.1	ENSMUSG00000025907.14	Rb1cc1	protein_coding	OTTMUSG00000033467.1	OTTMUST00000084091.1	2	---	ENSMUSP00000027040.6	Rb1cc1-201	1	protein_coding
TetK27	chr1	6441233	6441509	276	6441421	24	9.15199	3.91621	7.25158	TetK27_peak_8	Gm19026	ENSMUST00000194240.1	-	6429655	6441297	TSS	0	-11578	0.005583	0.234657	---	ENSMUSG00000103845.1	Gm19026	processed_pseudogene	OTTMUSG00000050243.1	OTTMUST00000127629.1	1	PGO:0000004	---	Gm19026-201		processed_pseudogene
TetK27	chr1	7087672	7090763	3091	7089085	284	418.858	61.3094	413.88	TetK27_peak_9	Pcmtd1	ENSMUST00000182114.7	+	7088930	7169599	TSS	0	-78836	0.022735	0.593144	---	ENSMUSG00000051285.17	Pcmtd1	protein_coding	OTTMUSG00000043373.1	OTTMUST00000113813.1	2	---	ENSMUSP00000138680.1	Pcmtd1-202	1	protein_coding
TetK27	chr1	7095474	7095725	251	7095669	10	3.92564	2.97589	2.18676	TetK27_peak_10	Pcmtd1	ENSMUST00000182114.7	+	7088930	7169599	5' UTR Exon	6544	-73874	0.003124	1.000000	---	ENSMUSG00000051285.17	Pcmtd1	protein_coding	OTTMUSG00000043373.1	OTTMUST00000113813.1	2	---	ENSMUSP00000138680.1	Pcmtd1-202	1	protein_coding
TetK27	chr1	7095940	7096558	618	7096377	21	12.6908	5.95178	10.7156	TetK27_peak_11	Pcmtd1	ENSMUST00000182114.7	+	7088930	7169599	5' UTR Exon	7010	-73041	0.007673	1.000000	---	ENSMUSG00000051285.17	Pcmtd1	protein_coding	OTTMUSG00000043373.1	OTTMUST00000113813.1	2	---	ENSMUSP00000138680.1	Pcmtd1-202	1	protein_coding
TetK27	chr1	7206167	7206463	296	7206358	11	3.85142	2.83672	2.13865	TetK27_peak_12	.	.	.	.	.	Intergenic	.	.	.	.	.	.	.	.	.	.	.	.	.	.	.	.
TetK27	chr1	7396738	7398786	2048	7397764	119	124.579	22.6117	121.788	TetK27_peak_13	Gm26901	ENSMUST00000181554.1	-	7349406	7397802	TSS	0	-47332	0.022005	0.519766	---	ENSMUSG00000097797.6	Gm26901	lincRNA	OTTMUSG00000050305.1	OTTMUST00000127739.1	2	---	---	Gm26901-201	1	lincRNA
TetK27	chr1	7709112	7709647	535	7709429	39	26.4593	8.38819	24.3094	TetK27_peak_14	.	.	.	.	.	Intergenic	.	.	.	.	.	.	.	.	.	.	.	.	.	.	.	.
TetK27	chr1	9235601	9237842	2241	9235956	39	31.822	10.8214	29.6171	TetK27_peak_15	Sntg1	ENSMUST00000191683.5	-	8361475	9298865	5' UTR Exon	61023	-874126	0.002392	1.000000	CCDS69860.1	ENSMUSG00000025909.16	Sntg1	protein_coding	OTTMUSG00000033160.1	OTTMUST00000128337.1	2	---	ENSMUSP00000141839.1	Sntg1-210	1	protein_coding
TetK27	chr1	9544783	9546530	1747	9545672	123	101.65	14.5246	98.9829	TetK27_peak_16	Rrs1	ENSMUST00000072079.8	+	9545408	9547456	TSS	0	-926	0.548072	0.642449	CCDS14811.1	ENSMUSG00000061024.8	Rrs1	protein_coding	OTTMUSG00000045230.1	OTTMUST00000118821.1	2	---	ENSMUSP00000071955.7	Rrs1-201		protein_coding
TetK27	chr1	9699519	9700295	776	9699992	59	45.7085	11.3059	43.3896	TetK27_peak_17	Mybl1	ENSMUST00000088658.10	-	9667415	9700210	TSS	0	-32104	0.021100	0.890605	CCDS35510.1	ENSMUSG00000025912.16	Mybl1	protein_coding	OTTMUSG00000034736.1	OTTMUST00000088260.1	2	---	ENSMUSP00000086034.4	Mybl1-201	1	protein_coding
TetK27	chr1	9700564	9701213	649	9700801	69	54.1793	11.9753	51.8011	TetK27_peak_18	Mybl1	ENSMUST00000088658.10	-	9667415	9700210	TSS	-354	-33149	0.000000	0.000000	CCDS35510.1	ENSMUSG00000025912.16	Mybl1	protein_coding	OTTMUSG00000034736.1	OTTMUST00000088260.1	2	---	ENSMUSP00000086034.4	Mybl1-201	1	protein_coding
TetK27	chr1	9745386	9746028	642	9745526	21	12.6908	5.95178	10.7156	TetK27_peak_19	Vcpip1	ENSMUST00000057438.6	-	9718622	9748383	CDS Exon 1	2355	-26764	0.021605	1.000000	CCDS14814.1	ENSMUSG00000045210.8	Vcpip1	protein_coding	OTTMUSG00000022113.1	OTTMUST00000052491.1	2	---	ENSMUSP00000051248.6	Vcpip1-201	1	protein_coding
TetK27	chr1	9746419	9748933	2514	9748154	219	314.356	53.5537	310.413	TetK27_peak_20	1700034P13Rik	ENSMUST00000189431.1	+	9748587	9771096	TSS	0	-22163	0.015415	0.137972	---	ENSMUSG00000097893.8	1700034P13Rik	antisense_RNA	OTTMUSG00000045232.1	OTTMUST00000118829.1	2	---	---	1700034P13Rik-204	5	antisense_RNA
TetK27	chr1	9797828	9798629	801	9798347	53	30.3607	7.23815	28.1749	TetK27_peak_21	Sgk3	ENSMUST00000188738.6	+	9798185	9899619	TSS	0	-100990	0.004387	0.554863	---	ENSMUSG00000025915.14	Sgk3	protein_coding	OTTMUSG00000045250.1	OTTMUST00000118860.1	2	---	ENSMUSP00000140496.1	Sgk3-208	1	nonsense_mediated_decay
TetK27	chr1	9848296	9848664	368	9848459	22	13.6241	6.22232	11.6331	TetK27_peak_22	Sgk3	ENSMUST00000171265.7	+	9848272	9900844	TSS	24	-52180	0.007019	1.000000	CCDS14816.1	ENSMUSG00000025915.14	Sgk3	protein_coding	OTTMUSG00000045250.1	OTTMUST00000118862.1	2	---	ENSMUSP00000127462.1	Sgk3-204	1	protein_coding
TetK27	chr1	9942841	9943305	464	9943012	21	10.8181	5.0248	8.888	TetK27_peak_23	Snhg6	ENSMUST00000182043.7	-	9942025	9942898	TSS	0	-816	0.066362	0.124731	---	ENSMUSG00000098234.7	Snhg6	lincRNA	OTTMUSG00000043382.1	OTTMUST00000113825.1	2	---	---	Snhg6-201	2	lincRNA
TetK27	chr1	9943531	9944801	1270	9943908	126	122.951	19.8943	120.168	TetK27_peak_24	Snhg6	ENSMUST00000182043.7	-	9942025	9942898	TSS	-633	-1506	0.000000	0.000000	---	ENSMUSG00000098234.7	Snhg6	lincRNA	OTTMUSG00000043382.1	OTTMUST00000113825.1	2	---	---	Snhg6-201	2	lincRNA
TetK27	chr1	9967855	9968387	532	9968187	14	6.74667	4.05803	4.90229	TetK27_peak_25	Tcf24	ENSMUST00000185184.1	-	9960163	9967933	TSS	0	-7692	0.010166	0.148218	CCDS69862.1	ENSMUSG00000099032.2	Tcf24	protein_coding	OTTMUSG00000044905.1	OTTMUST00000118029.1	2	---	ENSMUSP00000138827.1	Tcf24-202	5	protein_coding
TetK27	chr1	10037267	10040388	3121	10038002	282	327.586	33.149	323.53	TetK27_peak_26	Cops5	ENSMUST00000186528.6	-	10027198	10037942	TSS	0	-10069	0.062913	0.216528	---	ENSMUSG00000025917.9	Cops5	protein_coding	OTTMUSG00000029459.1	OTTMUST00000118982.1	2	---	ENSMUSP00000140633.1	Cops5-204	2	nonsense_mediated_decay
TetK27	chr1	10228810	10229186	376	10228942	13	5.99569	3.7875	4.17465	TetK27_peak_27	Arfgef1	ENSMUST00000131556.1	-	10173075	10232671	Intron 1	3485	-55735	0.006326	1.000000	---	ENSMUSG00000067851.11	Arfgef1	protein_coding	OTTMUSG00000033923.1	OTTMUST00000085576.1	2	---	ENSMUSP00000118805.1	Arfgef1-203	5	protein_coding
TetK27	chr1	10231414	10233987	2573	10232778	279	345.73	38.8024	341.512	TetK27_peak_28	Arfgef1	ENSMUST00000131556.1	-	10173075	10232671	TSS	0	-58339	0.021108	0.488733	---	ENSMUSG00000067851.11	Arfgef1	protein_coding	OTTMUSG00000033923.1	OTTMUST00000085576.1	2	---	ENSMUSP00000118805.1	Arfgef1-203	5	protein_coding
TetK27	chr1	10254479	10254874	395	10254723	20	9.1644	4.4038	7.25768	TetK27_peak_29	.	.	.	.	.	Intergenic	.	.	.	.	.	.	.	.	.	.	.	.	.	.	.	.
TetK27	chr1	10256649	10257945	1296	10257413	33	24.9599	9.19821	22.8231	TetK27_peak_30	.	.	.	.	.	Intergenic	.	.	.	.	.	.	.	.	.	.	.	.	.	.	.	.
TetK27	chr1	10325478	10326077	599	10325633	14	5.78446	3.5459	3.98249	TetK27_peak_31	Cpa6	ENSMUST00000153695.7	-	10324720	10719946	TTS	393869	-758	0.001518	1.000000	---	ENSMUSG00000042501.12	Cpa6	protein_coding	OTTMUSG00000024232.1	OTTMUST00000059300.1	2	---	ENSMUSP00000118341.1	Cpa6-204	1	nonsense_mediated_decay
TetK27	chr1	13052228	13052492	264	13052356	16	7.21211	4.01869	5.36317	TetK27_peak_32	.	.	.	.	.	Intergenic	.	.	.	.	.	.	.	.	.	.	.	.	.	.	.	.
TetK27	chr1	13154972	13156672	1700	13156079	56	53.2036	15.4205	50.829	TetK27_peak_33	Ncoa2	ENSMUST00000006037.12	-	13142475	13374084	CDS Exon 16	217412	-12497	0.007344	1.000000	CCDS35515.1	ENSMUSG00000005886.14	Ncoa2	protein_coding	OTTMUSG00000021630.1	OTTMUST00000051367.1	2	---	ENSMUSP00000006037.6	Ncoa2-201	1	protein_coding
TetK27	chr1	13160944	13163324	2380	13162290	67	68.1894	18.3653	65.72	TetK27_peak_34	Ncoa2	ENSMUST00000006037.12	-	13142475	13374084	CDS Exon 14	210760	-18469	0.010280	1.000000	CCDS35515.1	ENSMUSG00000005886.14	Ncoa2	protein_coding	OTTMUSG00000021630.1	OTTMUST00000051367.1	2	---	ENSMUSP00000006037.6	Ncoa2-201	1	protein_coding
TetK27	chr1	13232371	13232640	269	13232475	15	7.52498	4.32857	5.65872	TetK27_peak_35	Ncoa2	ENSMUST00000145280.1	-	13190106	13299723	5' UTR Exon	67083	-42265	0.002463	1.000000	---	ENSMUSG00000005886.14	Ncoa2	protein_coding	OTTMUSG00000021630.1	OTTMUST00000051372.1	2	---	ENSMUSP00000116641.1	Ncoa2-208	3	protein_coding
TetK27	chr1	13265488	13265918	430	13265673	15	5.6314	3.35528	3.8322	TetK27_peak_36	Ncoa2	ENSMUST00000145280.1	-	13190106	13299723	5' UTR Exon	33805	-75382	0.003932	1.000000	---	ENSMUSG00000005886.14	Ncoa2	protein_coding	OTTMUSG00000021630.1	OTTMUST00000051372.1	2	---	ENSMUSP00000116641.1	Ncoa2-208	3	protein_coding
TetK27	chr1	13266137	13268967	2830	13267425	127	161.608	34.6285	158.621	TetK27_peak_37	Ncoa2	ENSMUST00000145280.1	-	13190106	13299723	5' UTR Exon	30756	-76031	0.025826	1.000000	---	ENSMUSG00000005886.14	Ncoa2	protein_coding	OTTMUSG00000021630.1	OTTMUST00000051372.1	2	---	ENSMUSP00000116641.1	Ncoa2-208	3	protein_coding
TetK27	chr1	13292602	13292880	278	13292802	13	5.99569	3.7875	4.17465	TetK27_peak_38	Ncoa2	ENSMUST00000145280.1	-	13190106	13299723	5' UTR Exon	6843	-102496	0.002545	1.000000	---	ENSMUSG00000005886.14	Ncoa2	protein_coding	OTTMUSG00000021630.1	OTTMUST00000051372.1	2	---	ENSMUSP00000116641.1	Ncoa2-208	3	protein_coding
TetK27	chr1	13292938	13294496	1558	13293464	90	102.088	24.6187	99.4154	TetK27_peak_39	Ncoa2	ENSMUST00000145280.1	-	13190106	13299723	5' UTR Exon	5227	-102832	0.014222	1.000000	---	ENSMUSG00000005886.14	Ncoa2	protein_coding	OTTMUSG00000021630.1	OTTMUST00000051372.1	2	---	ENSMUSP00000116641.1	Ncoa2-208	3	protein_coding
TetK27	chr1	13294785	13295510	725	13295173	25	16.5309	7.03392	14.4964	TetK27_peak_40	Ncoa2	ENSMUST00000145280.1	-	13190106	13299723	5' UTR Exon	4213	-104679	0.006623	1.000000	---	ENSMUSG00000005886.14	Ncoa2	protein_coding	OTTMUSG00000021630.1	OTTMUST00000051372.1	2	---	ENSMUSP00000116641.1	Ncoa2-208	3	protein_coding
TetK27	chr1	13336424	13336706	282	13336546	15	7.52498	4.32857	5.65872	TetK27_peak_41	Ncoa2	ENSMUST00000006037.12	-	13142475	13374084	5' UTR Exon	37378	-193949	0.001222	1.000000	CCDS35515.1	ENSMUSG00000005886.14	Ncoa2	protein_coding	OTTMUSG00000021630.1	OTTMUST00000051367.1	2	---	ENSMUSP00000006037.6	Ncoa2-201	1	protein_coding
TetK27	chr1	13337563	13339142	1579	13337721	23	14.5757	6.49285	12.5699	TetK27_peak_42	Ncoa2	ENSMUST00000006037.12	-	13142475	13374084	5' UTR Exon	34942	-195088	0.006822	1.000000	CCDS35515.1	ENSMUSG00000005886.14	Ncoa2	protein_coding	OTTMUSG00000021630.1	OTTMUST00000051367.1	2	---	ENSMUSP00000006037.6	Ncoa2-201	1	protein_coding
TetK27	chr1	13363485	13364430	945	13363724	31	22.7693	8.65714	20.656	TetK27_peak_43	Ncoa2	ENSMUST00000006037.12	-	13142475	13374084	5' UTR Exon	9654	-221010	0.004084	1.000000	CCDS35515.1	ENSMUSG00000005886.14	Ncoa2	protein_coding	OTTMUSG00000021630.1	OTTMUST00000051367.1	2	---	ENSMUSP00000006037.6	Ncoa2-201	1	protein_coding
TetK27	chr1	13371926	13374919	2993	13372947	282	356.527	40.8836	352.207	TetK27_peak_44	Ncoa2	ENSMUST00000147927.7	-	13164501	13374084	TSS	0	-207425	0.010301	0.721109	---	ENSMUSG00000005886.14	Ncoa2	protein_coding	OTTMUSG00000021630.1	OTTMUST00000051368.1	2	---	---	Ncoa2-210	1	retained_intron
TetK27	chr1	13382741	13383498	757	13382991	32	19.5106	6.92026	17.4433	TetK27_peak_45	Gm29570	ENSMUST00000185813.1	+	13376070	13388414	Intron 1	6671	-4916	0.061401	1.000000	---	ENSMUSG00000101476.1	Gm29570	antisense_RNA	OTTMUSG00000049110.1	OTTMUST00000125381.1	2	---	---	Gm29570-201	3	antisense_RNA
TetK27	chr1	13383687	13384247	560	13383919	32	23.8582	8.92767	21.733	TetK27_peak_46	Gm29570	ENSMUST00000185813.1	+	13376070	13388414	Intron 1	7617	-4167	0.045443	1.000000	---	ENSMUSG00000101476.1	Gm29570	antisense_RNA	OTTMUSG00000049110.1	OTTMUST00000125381.1	2	---	---	Gm29570-201	3	antisense_RNA
TetK27	chr1	13426329	13427734	1405	13426605	95	109.8	25.9714	107.086	TetK27_peak_47	.	.	.	.	.	Intergenic	.	.	.	.	.	.	.	.	.	.	.	.	.	.	.	.
TetK27	chr1	13494783	13495161	378	13495032	18	8.73676	4.49148	6.84645	TetK27_peak_48	.	.	.	.	.	Intergenic	.	.	.	.	.	.	.	.	.	.	.	.	.	.	.	.
TetK27	chr1	13513601	13514332	731	13513944	30	21.6938	8.3866	19.5925	TetK27_peak_49	.	.	.	.	.	Intergenic	.	.	.	.	.	.	.	.	.	.	.	.	.	.	.	.
TetK27	chr1	13521069	13522228	1159	13521661	47	35.0392	10.0658	32.81	TetK27_peak_50	.	.	.	.	.	Intergenic	.	.	.	.	.	.	.	.	.	.	.	.	.	.	.	.
TetK27	chr1	13559634	13560299	665	13559865	18	9.99233	5.13149	8.07998	TetK27_peak_51	.	.	.	.	.	Intergenic	.	.	.	.	.	.	.	.	.	.	.	.	.	.	.	.
TetK27	chr1	13587970	13590409	2439	13589485	243	292.225	35.2494	288.456	TetK27_peak_52	Tram1	ENSMUST00000188377.1	-	13578118	13589876	TSS	0	-9852	0.162174	0.781557	---	ENSMUSG00000025935.10	Tram1	protein_coding	OTTMUSG00000049113.1	OTTMUST00000125387.1	2	---	ENSMUSP00000140499.1	Tram1-203	3	nonsense_mediated_decay
TetK27	chr1	13593226	13593967	741	13593725	23	12.9142	5.67344	10.9367	TetK27_peak_53	.	.	.	.	.	Intergenic	.	.	.	.	.	.	.	.	.	.	.	.	.	.	.	.
TetK27	chr1	13599714	13600121	407	13599841	12	5.2738	3.51696	3.47795	TetK27_peak_54	.	.	.	.	.	Intergenic	.	.	.	.	.	.	.	.	.	.	.	.	.	.	.	.
TetK27	chr1	13659327	13661329	2002	13660266	180	254.574	48.8842	251.066	TetK27_peak_55	Lactb2	ENSMUST00000027071.6	-	13623330	13660547	TSS	0	-35997	0.032807	0.609586	CCDS14823.1	ENSMUSG00000025937.6	Lactb2	protein_coding	OTTMUSG00000021599.1	OTTMUST00000051280.1	2	---	ENSMUSP00000027071.5	Lactb2-201	1	protein_coding
TetK27	chr1	15804992	15806830	1838	15805846	260	370.247	54.733	365.792	TetK27_peak_56	Terf1	ENSMUST00000027057.7	+	15805664	15843471	TSS	0	-36641	0.030866	0.634584	CCDS78547.1	ENSMUSG00000025925.14	Terf1	protein_coding	OTTMUSG00000047984.1	OTTMUST00000123361.1	2	---	ENSMUSP00000027057.7	Terf1-201	1	protein_coding
TetK27	chr1	16092963	16093247	284	16093136	25	9.83993	4.07286	7.92915	TetK27_peak_57	4930444P10Rik	ENSMUST00000145070.7	-	16065979	16093326	TSS	79	-26984	0.010421	1.000000	CCDS56622.1	ENSMUSG00000067795.13	4930444P10Rik	protein_coding	OTTMUSG00000022165.1	OTTMUST00000052633.1	2	---	ENSMUSP00000137853.1	4930444P10Rik-202	2	protein_coding
TetK27	chr1	16103040	16106543	3503	16105037	185	201.762	26.8705	198.564	TetK27_peak_58	Rpl7	ENSMUST00000140597.7	-	16101295	16102083	TSS	-957	-1745	0.000000	0.000000	---	ENSMUSG00000043716.13	Rpl7	protein_coding	OTTMUSG00000016936.1	OTTMUST00000041078.1	2	---	---	Rpl7-203	1	processed_transcript
TetK27	chr1	16162815	16163073	258	16162960	19	10.8823	5.41071	8.93972	TetK27_peak_59	.	.	.	.	.	Intergenic	.	.	.	.	.	.	.	.	.	.	.	.	.	.	.	.
TetK27	chr1	16177553	16178320	767	16177783	23	14.5757	6.49285	12.5699	TetK27_peak_60	.	.	.	.	.	Intergenic	.	.	.	.	.	.	.	.	.	.	.	.	.	.	.	.
TetK27	chr1	16518982	16519504	522	16519170	42	25.3659	7.35627	23.2278	TetK27_peak_61	Stau2	ENSMUST00000149320.8	-	16345594	16519308	TSS	0	-173388	0.001882	0.625239	CCDS83528.1	ENSMUSG00000025920.19	Stau2	protein_coding	OTTMUSG00000033135.1	OTTMUST00000086842.1	2	---	ENSMUSP00000118489.2	Stau2-210	5	protein_coding
TetK27	chr1	16519705	16520151	446	16519910	34	13.3847	4.37563	11.4051	TetK27_peak_62	Stau2	ENSMUST00000149320.8	-	16345594	16519308	TSS	-397	-174111	0.000000	0.000000	CCDS83528.1	ENSMUSG00000025920.19	Stau2	protein_coding	OTTMUSG00000033135.1	OTTMUST00000086842.1	2	---	ENSMUSP00000118489.2	Stau2-210	5	protein_coding
TetK27	chr1	16618198	16619935	1737	16618963	253	308.471	36.6941	304.577	TetK27_peak_63	Ube2w	ENSMUST00000136455.8	-	16584158	16619285	TSS	0	-34040	0.030972	0.626007	---	ENSMUSG00000025939.17	Ube2w	protein_coding	OTTMUSG00000029683.1	OTTMUST00000073648.1	2	---	---	Ube2w-204	1	retained_intron
TetK27	chr1	16641864	16642478	614	16642292	20	11.7766	5.68125	9.81736	TetK27_peak_64	Eloc	ENSMUST00000188641.6	-	16641725	16656885	TTS	14407	-139	0.040565	1.000000	CCDS35517.1	ENSMUSG00000079658.9	Eloc	protein_coding	OTTMUSG00000048076.1	OTTMUST00000123524.1	2	---	ENSMUSP00000140422.1	Eloc-208	1	protein_coding
TetK27	chr1	16655727	16656039	312	16655924	18	6.04972	3.25045	4.2283	TetK27_peak_65	Eloc	ENSMUST00000185771.6	-	16643191	16656915	5' UTR Exon	876	-12536	0.022805	1.000000	CCDS35517.1	ENSMUSG00000079658.9	Eloc	protein_coding	OTTMUSG00000048076.1	OTTMUST00000123528.1	2	---	ENSMUSP00000139675.1	Eloc-203	5	protein_coding
TetK27	chr1	16656094	16657887	1793	16656668	229	313.998	48.2321	310.056	TetK27_peak_66	Eloc	ENSMUST00000188641.6	-	16641725	16656885	TSS	0	-14369	0.052239	0.441472	CCDS35517.1	ENSMUSG00000079658.9	Eloc	protein_coding	OTTMUSG00000048076.1	OTTMUST00000123524.1	2	---	ENSMUSP00000140422.1	Eloc-208	1	protein_coding
TetK27	chr1	16664842	16666056	1214	16665437	158	192.483	33.3431	189.335	TetK27_peak_67	Tmem70	ENSMUST00000176451.1	+	16665236	16665812	TSS	0	0	1.000000	0.474897	---	ENSMUSG00000025940.6	Tmem70	protein_coding	OTTMUSG00000042171.1	OTTMUST00000110684.1	2	---	---	Tmem70-202	3	processed_transcript
TetK27	chr1	16687334	16689614	2280	16688520	111	135.209	30.3	132.36	TetK27_peak_68	Ly96	ENSMUST00000026881.10	+	16688433	16709612	TSS	0	-19998	0.055807	0.518194	CCDS14832.1	ENSMUSG00000025779.10	Ly96	protein_coding	OTTMUSG00000048080.1	OTTMUST00000123539.1	2	---	ENSMUSP00000026881.4	Ly96-201	1	protein_coding
TetK27	chr1	16747139	16748500	1361	16747648	19	9.53241	4.72787	7.62311	TetK27_peak_69	.	.	.	.	.	Intergenic	.	.	.	.	.	.	.	.	.	.	.	.	.	.	.	.
TetK27	chr1	20259824	20260296	472	20260055	15	7.52498	4.32857	5.65872	TetK27_peak_70	Pkhd1	ENSMUST00000088448.11	-	20057779	20618065	Intron 52	357769	-202045	0.000844	1.000000	CCDS14841.1	ENSMUSG00000043760.16	Pkhd1	protein_coding	OTTMUSG00000026248.1	OTTMUST00000064911.1	2	---	ENSMUSP00000085794.5	Pkhd1-201	1	protein_coding
TetK27	chr1	20819599	20820548	949	20819976	177	183.358	23.8591	180.26	TetK27_peak_71	Mcm3	ENSMUST00000053266.10	-	20802968	20820313	TSS	0	-16631	0.041220	0.752632	CCDS14843.1	ENSMUSG00000041859.10	Mcm3	protein_coding	OTTMUSG00000048358.1	OTTMUST00000124003.1	2	---	ENSMUSP00000059192.9	Mcm3-201	1	protein_coding
TetK27	chr1	20890119	20891555	1436	20890788	72	75.2875	19.7157	72.773	TetK27_peak_72	Paqr8	ENSMUST00000189400.6	+	20890606	20939651	TSS	0	-48096	0.019370	0.661100	CCDS14844.1	ENSMUSG00000025931.15	Paqr8	protein_coding	OTTMUSG00000048364.1	OTTMUST00000124029.1	2	---	ENSMUSP00000141054.1	Paqr8-204	1	protein_coding
TetK27	chr1	20912458	20912960	502	20912773	24	15.5448	6.76339	13.5242	TetK27_peak_73	Paqr8	ENSMUST00000189400.6	+	20890606	20939651	5' UTR Exon	21852	-26691	0.010256	1.000000	CCDS14844.1	ENSMUSG00000025931.15	Paqr8	protein_coding	OTTMUSG00000048364.1	OTTMUST00000124029.1	2	---	ENSMUSP00000141054.1	Paqr8-204	1	protein_coding
TetK27	chr1	20951722	20952042	320	20951869	17	9.15743	4.86964	7.25158	TetK27_peak_74	Efhc1	ENSMUST00000038447.5	+	20951688	20990842	TSS	34	-38800	0.008198	1.000000	CCDS48227.1	ENSMUSG00000041809.5	Efhc1	protein_coding	OTTMUSG00000029838.1	OTTMUST00000074047.1	2	---	ENSMUSP00000042343.4	Efhc1-201	1	protein_coding
TetK27	chr1	21064312	21064726	414	21064550	13	5.99569	3.7875	4.17465	TetK27_peak_75	Tram2	ENSMUST00000037998.5	-	20996299	21079230	Intron 1	14504	-68013	0.005004	1.000000	CCDS14846.1	ENSMUSG00000041779.5	Tram2	protein_coding	OTTMUSG00000026556.1	OTTMUST00000065709.1	2	---	ENSMUSP00000047992.4	Tram2-201	1	protein_coding
TetK27	chr1	21078556	21079915	1359	21079004	86	96.0035	23.5366	93.3649	TetK27_peak_76	Gm28287	ENSMUST00000186612.1	+	21080114	21081749	TSS	-199	-1834	0.000000	0.000000	---	ENSMUSG00000099971.1	Gm28287	antisense_RNA	OTTMUSG00000048817.1	OTTMUST00000124879.1	2	---	---	Gm28287-201	5	antisense_RNA
TetK27	chr1	21218227	21219564	1337	21218695	164	225.819	44.6384	222.485	TetK27_peak_77	Tmem14a	ENSMUST00000027064.7	+	21218662	21230165	TSS	0	-10601	0.078494	0.674888	CCDS69867.1	ENSMUSG00000025933.15	Tmem14a	protein_coding	OTTMUSG00000029833.1	OTTMUST00000074040.1	2	---	ENSMUSP00000027064.7	Tmem14a-201	1	protein_coding
TetK27	chr1	21520186	21520655	469	21520405	16	7.72059	4.279	5.85268	TetK27_peak_78	Kcnq5	ENSMUST00000115299.7	-	21466245	21961666	Intron 3	441011	-53941	0.000949	1.000000	---	ENSMUSG00000028033.16	Kcnq5	protein_coding	OTTMUSG00000019675.1	OTTMUST00000054606.1	2	---	---	Kcnq5-202	5	retained_intron
TetK27	chr1	21650745	21650998	253	21650824	11	4.58302	3.24643	2.81413	TetK27_peak_79	Kcnq5	ENSMUST00000115299.7	-	21466245	21961666	Intron 1	310668	-184500	0.000513	1.000000	---	ENSMUSG00000028033.16	Kcnq5	protein_coding	OTTMUSG00000019675.1	OTTMUST00000054606.1	2	---	---	Kcnq5-202	5	retained_intron
TetK27	chr1	21829808	21830428	620	21829942	14	6.74667	4.05803	4.90229	TetK27_peak_80	Kcnq5	ENSMUST00000115299.7	-	21466245	21961666	Intron 1	131238	-363563	0.001253	1.000000	---	ENSMUSG00000028033.16	Kcnq5	protein_coding	OTTMUSG00000019675.1	OTTMUST00000054606.1	2	---	---	Kcnq5-202	5	retained_intron
TetK27	chr1	21960064	21964307	4243	21961003	88	92.2828	21.039	89.6663	TetK27_peak_81	Kcnq5	ENSMUST00000174183.7	-	21402163	21961582	TSS	0	-557901	0.002715	0.357917	---	ENSMUSG00000028033.16	Kcnq5	protein_coding	OTTMUSG00000019675.1	OTTMUST00000097899.1	2	---	ENSMUSP00000134389.1	Kcnq5-207	5	nonsense_mediated_decay
TetK27	chr1	23301171	23302299	1128	23301543	55	50.5857	14.5406	48.2297	TetK27_peak_82	.	.	.	.	.	Intergenic	.	.	.	.	.	.	.	.	.	.	.	.	.	.	.	.
TetK27	chr1	23306066	23306508	442	23306280	36	25.0038	8.45079	22.8669	TetK27_peak_83	.	.	.	.	.	Intergenic	.	.	.	.	.	.	.	.	.	.	.	.	.	.	.	.
TetK27	chr1	23382661	23383069	408	23382857	27	9.8616	3.88024	7.95078	TetK27_peak_84	Ogfrl1	ENSMUST00000027343.5	-	23366424	23383176	CDS Exon 1	107	-16237	0.024414	1.000000	CCDS35526.1	ENSMUSG00000026158.11	Ogfrl1	protein_coding	OTTMUSG00000046267.1	OTTMUST00000120614.1	2	---	ENSMUSP00000027343.5	Ogfrl1-201	3	protein_coding
TetK27	chr1	23840372	23840623	251	23840488	14	6.74667	4.05803	4.90229	TetK27_peak_85	B3gat2	ENSMUST00000063663.5	+	23761926	23849159	Intron 2	78446	-8536	0.002889	1.000000	CCDS14850.1	ENSMUSG00000026156.8	B3gat2	protein_coding	OTTMUSG00000026519.1	OTTMUST00000065597.1	2	---	ENSMUSP00000066582.5	B3gat2-201	1	protein_coding
TetK27	chr1	23841662	23842124	462	23841880	19	10.8823	5.41071	8.93972	TetK27_peak_86	B3gat2	ENSMUST00000063663.5	+	23761926	23849159	Intron 2	79736	-7035	0.005308	1.000000	CCDS14850.1	ENSMUSG00000026156.8	B3gat2	protein_coding	OTTMUSG00000026519.1	OTTMUST00000065597.1	2	---	ENSMUSP00000066582.5	B3gat2-201	1	protein_coding
TetK27	chr1	23842282	23842582	300	23842495	14	6.74667	4.05803	4.90229	TetK27_peak_87	B3gat2	ENSMUST00000063663.5	+	23761926	23849159	Intron 2	80356	-6577	0.003450	1.000000	CCDS14850.1	ENSMUSG00000026156.8	B3gat2	protein_coding	OTTMUSG00000026519.1	OTTMUST00000065597.1	2	---	ENSMUSP00000066582.5	B3gat2-201	1	protein_coding
TetK27	chr1	23897318	23897591	273	23897485	12	5.2738	3.51696	3.47795	TetK27_peak_88	Smap1	ENSMUST00000129254.7	-	23846296	23909690	5' UTR Exon	12099	-51022	0.004322	1.000000	CCDS69870.1	ENSMUSG00000026155.13	Smap1	protein_coding	OTTMUSG00000026521.1	OTTMUST00000065604.1	2	---	ENSMUSP00000117875.1	Smap1-202	1	protein_coding
TetK27	chr1	23914696	23919481	4785	23916079	50	45.3688	13.7973	43.0514	TetK27_peak_89	Smap1	ENSMUST00000027339.13	-	23845625	23922318	Intron 1	2837	-69071	0.062404	1.000000	CCDS14851.1	ENSMUSG00000026155.13	Smap1	protein_coding	OTTMUSG00000026521.1	OTTMUST00000065602.1	2	---	ENSMUSP00000027339.7	Smap1-201	1	protein_coding
TetK27	chr1	23920299	23920709	410	23920545	16	8.32904	4.5991	6.44257	TetK27_peak_90	Smap1	ENSMUST00000027339.13	-	23845625	23922318	Intron 1	1609	-74674	0.005359	1.000000	CCDS14851.1	ENSMUSG00000026155.13	Smap1	protein_coding	OTTMUSG00000026521.1	OTTMUST00000065602.1	2	---	ENSMUSP00000027339.7	Smap1-201	1	protein_coding
TetK27	chr1	23921089	23923271	2182	23922091	282	327.586	33.149	323.53	TetK27_peak_91	Smap1	ENSMUST00000027339.13	-	23845625	23922318	TSS	0	-75464	0.016038	0.563445	CCDS14851.1	ENSMUSG00000026155.13	Smap1	protein_coding	OTTMUSG00000026521.1	OTTMUST00000065602.1	2	---	ENSMUSP00000027339.7	Smap1-201	1	protein_coding
TetK27	chr1	23923637	23924306	669	23923828	27	18.5511	7.57499	16.4886	TetK27_peak_92	.	.	.	.	.	Intergenic	.	.	.	.	.	.	.	.	.	.	.	.	.	.	.	.
TetK27	chr1	23959172	23959656	484	23959415	16	8.32904	4.5991	6.44257	TetK27_peak_93	.	.	.	.	.	Intergenic	.	.	.	.	.	.	.	.	.	.	.	.	.	.	.	.
TetK27	chr1	24005090	24005969	879	24005501	131	153.526	29.2461	150.582	TetK27_peak_94	Sdhaf4	ENSMUST00000155767.2	-	24002966	24005631	TSS	0	-2124	0.203301	0.615909	---	ENSMUSG00000026154.4	Sdhaf4	protein_coding	OTTMUSG00000022115.1	OTTMUST00000052496.1	2	---	---	Sdhaf4-202	3	processed_transcript
TetK27	chr1	24099926	24100321	395	24100080	22	9.61192	4.33391	7.70213	TetK27_peak_95	Fam135a	ENSMUST00000187752.6	-	24011245	24100195	TSS	0	-88681	0.003035	0.681818	---	ENSMUSG00000026153.15	Fam135a	protein_coding	OTTMUSG00000046269.1	OTTMUST00000120620.1	2	---	ENSMUSP00000139633.1	Fam135a-208	5	protein_coding
TetK27	chr1	24677180	24680091	2911	24678869	264	399.519	64.5079	394.765	TetK27_peak_96	Lmbrd1	ENSMUST00000191471.6	+	24678630	24765449	TSS	0	-85358	0.016839	0.502060	CCDS35528.1	ENSMUSG00000073725.8	Lmbrd1	protein_coding	OTTMUSG00000046322.1	OTTMUST00000120742.1	2	---	ENSMUSP00000140783.1	Lmbrd1-206	1	protein_coding
TetK27	chr1	25015531	25016015	484	25015778	35	25.1529	8.76334	23.0158	TetK27_peak_97	.	.	.	.	.	Intergenic	.	.	.	.	.	.	.	.	.	.	.	.	.	.	.	.
TetK27	chr1	25016119	25016551	432	25016340	20	7.31421	3.5926	5.4645	TetK27_peak_98	.	.	.	.	.	Intergenic	.	.	.	.	.	.	.	.	.	.	.	.	.	.	.	.
TetK27	chr1	29737224	29737501	277	29737304	23	12.9142	5.67344	10.9367	TetK27_peak_99	.	.	.	.	.	Intergenic	.	.	.	.	.	.	.	.	.	.	.	.	.	.	.	.
TetK27	chr1	30812753	30813071	318	30812871	17	6.97702	3.77469	5.13045	TetK27_peak_100	Phf3	ENSMUST00000187316.1	-	30811904	30813536	TTS	465	-849	0.195346	1.000000	---	ENSMUSG00000048874.15	Phf3	protein_coding	OTTMUSG00000048797.1	OTTMUST00000124827.1	2	---	---	Phf3-206	2	retained_intron
TetK27	chr1	30851859	30852234	375	30852000	14	6.74667	4.05803	4.90229	TetK27_peak_101	Phf3	ENSMUST00000188780.1	-	30831205	30873895	Intron 2	21661	-20654	0.008807	1.000000	---	ENSMUSG00000048874.15	Phf3	protein_coding	OTTMUSG00000048797.1	OTTMUST00000124833.1	2	---	ENSMUSP00000140935.1	Phf3-209	2	protein_coding
TetK27	chr1	30872548	30874882	2334	30873219	307	417.731	50.2038	412.767	TetK27_peak_102	Phf3	ENSMUST00000186733.6	-	30802339	30873582	TSS	0	-70209	0.014528	0.443255	CCDS35530.1	ENSMUSG00000048874.15	Phf3	protein_coding	OTTMUSG00000048797.1	OTTMUST00000124826.1	2	---	ENSMUSP00000139610.1	Phf3-205	5	protein_coding
TetK27	chr1	30948405	30951045	2640	30949999	329	465.391	56.4551	459.82	TetK27_peak_103	Ptp4a1	ENSMUST00000202889.1	-	30946544	30949588	TSS	0	-1861	0.388834	0.448315	---	ENSMUSG00000026064.15	Ptp4a1	protein_coding	OTTMUSG00000021326.1	OTTMUST00000137910.1	2	---	ENSMUSP00000143884.1	Ptp4a1-206	2	protein_coding
TetK27	chr1	33630882	33631479	597	33631093	13	5.11059	3.30951	3.33512	TetK27_peak_104	Prim2	ENSMUST00000027312.10	-	33453810	33669796	Intron 5	38317	-177072	0.002769	1.000000	CCDS14862.1	ENSMUSG00000026134.11	Prim2	protein_coding	OTTMUSG00000049047.1	OTTMUST00000125283.1	2	---	ENSMUSP00000027312.9	Prim2-201	1	protein_coding
TetK27	chr1	33669111	33670822	1711	33670120	134	152.043	27.4456	149.107	TetK27_peak_105	1700001G17Rik	ENSMUST00000191965.1	+	33669843	33670713	TSS	0	0	1.000000	0.508762	---	ENSMUSG00000103746.1	1700001G17Rik	TEC	OTTMUSG00000044989.1	---	3	---	---	1700001G17Rik-202		TEC
TetK27	chr1	33719603	33720636	1033	33720214	106	100.843	18.3051	98.178	TetK27_peak_106	Rab23	ENSMUST00000151482.7	+	33720138	33735355	TSS	0	-14719	0.032790	0.482592	---	ENSMUSG00000004768.14	Rab23	protein_coding	OTTMUSG00000021871.1	OTTMUST00000051912.1	2	---	---	Rab23-209	1	retained_intron
TetK27	chr1	33757153	33758108	955	33757678	89	90.565	19.9405	87.959	TetK27_peak_107	Bag2	ENSMUST00000187602.1	-	33746802	33757742	TSS	0	-10351	0.053926	0.617155	---	ENSMUSG00000042215.8	Bag2	protein_coding	OTTMUSG00000021814.1	OTTMUST00000125294.1	2	---	ENSMUSP00000139538.1	Bag2-203	2	protein_coding
TetK27	chr1	33813392	33814894	1502	33814317	111	98.3267	16.1801	95.6765	TetK27_peak_108	Zfp451	ENSMUST00000044455.7	-	33792136	33814571	TSS	0	-21256	0.052594	0.785096	CCDS69873.1	ENSMUSG00000042197.13	Zfp451	protein_coding	OTTMUSG00000021885.1	OTTMUST00000051956.1	2	---	ENSMUSP00000044372.5	Zfp451-202	1	protein_coding
TetK27	chr1	33883277	33883641	364	33883537	14	6.74667	4.05803	4.90229	TetK27_peak_109	Bend6	ENSMUST00000139700.2	-	33873758	33883491	TSS	0	-9519	0.022088	0.589041	---	ENSMUSG00000042182.16	Bend6	protein_coding	OTTMUSG00000021502.1	OTTMUST00000077983.1	2	---	---	Bend6-205	3	processed_transcript
TetK27	chr1	33907850	33908111	261	33907870	21	4.41707	2.42409	2.67358	TetK27_peak_110	Bend6	ENSMUST00000115161.7	-	33852052	33907769	TSS	-81	-55798	0.000000	0.000000	CCDS78557.1	ENSMUSG00000042182.16	Bend6	protein_coding	OTTMUSG00000021502.1	OTTMUST00000050968.1	2	---	ENSMUSP00000110814.1	Bend6-202	1	protein_coding
TetK27	chr1	33993962	33994304	342	33994130	16	8.32904	4.5991	6.44257	TetK27_peak_111	Dst	ENSMUST00000183034.4	+	33908225	34307593	Intron 3	85737	-313289	0.000859	1.000000	CCDS69874.1	ENSMUSG00000026131.18	Dst	protein_coding	OTTMUSG00000044431.1	OTTMUST00000116984.1	1	---	ENSMUSP00000138308.1	Dst-211	5	protein_coding
TetK27	chr1	34005193	34006898	1705	34006287	93	106.702	25.4303	104.004	TetK27_peak_112	Dst	ENSMUST00000183331.7	+	34006180	34164701	TSS	0	-157803	0.004536	0.421454	---	ENSMUSG00000026131.18	Dst	protein_coding	OTTMUSG00000044431.1	OTTMUST00000125614.1	2	---	---	Dst-214	5	retained_intron
TetK27	chr1	34010973	34012108	1135	34011615	75	55.1045	10.9793	52.7191	TetK27_peak_113	Dst	ENSMUST00000097785.9	+	34011825	34308662	TSS	0	-296554	0.000957	0.250000	CCDS35534.1	ENSMUSG00000026131.18	Dst	protein_coding	OTTMUSG00000044431.1	OTTMUST00000116990.1	2	---	ENSMUSP00000095392.2	Dst-201	1	protein_coding
TetK27	chr1	34028405	34029548	1143	34028727	26	17.5331	7.30446	15.4838	TetK27_peak_114	Dst	ENSMUST00000183331.7	+	34006180	34164701	Intron 1	22225	-135153	0.007217	1.000000	---	ENSMUSG00000026131.18	Dst	protein_coding	OTTMUSG00000044431.1	OTTMUST00000125614.1	2	---	---	Dst-214	5	retained_intron
TetK27	chr1	34060980	34061241	261	34061202	14	4.34138	2.82647	2.59991	TetK27_peak_115	Dst	ENSMUST00000183331.7	+	34006180	34164701	Intron 1	54800	-103460	0.001653	1.000000	---	ENSMUSG00000026131.18	Dst	protein_coding	OTTMUSG00000044431.1	OTTMUST00000125614.1	2	---	---	Dst-214	5	retained_intron
TetK27	chr1	34236361	34236817	456	34236536	19	9.53241	4.72787	7.62311	TetK27_peak_116	Dst	ENSMUST00000194192.2	+	34236596	34274284	TSS	0	-37467	0.005890	0.485777	---	ENSMUSG00000026131.18	Dst	protein_coding	OTTMUSG00000044431.1	OTTMUST00000117001.1	2	---	ENSMUSP00000148563.1	Dst-220	5	protein_coding
TetK27	chr1	34432259	34435944	3685	34435159	122	153.26	33.2759	150.317	TetK27_peak_117	Gm37233	ENSMUST00000192173.1	-	34427002	34433265	TSS	0	-5257	0.160760	0.273196	---	ENSMUSG00000102336.1	Gm37233	lincRNA	OTTMUSG00000049788.1	OTTMUST00000126812.1	2	---	---	Gm37233-201		lincRNA
TetK27	chr1	34438900	34440651	1751	34439603	205	296.661	53.6771	292.858	TetK27_peak_118	Imp4	ENSMUST00000134327.1	+	34439937	34444028	TSS	0	-3377	0.174731	0.408105	---	ENSMUSG00000026127.13	Imp4	protein_coding	OTTMUSG00000029577.1	OTTMUST00000073355.1	2	---	---	Imp4-203	2	processed_transcript
TetK27	chr1	34459357	34460378	1021	34460029	47	35.6631	10.3258	33.4263	TetK27_peak_119	Ptpn18	ENSMUST00000190122.1	+	34459777	34471918	TSS	0	-11540	0.049580	0.589041	---	ENSMUSG00000026126.15	Ptpn18	protein_coding	OTTMUSG00000049465.1	OTTMUST00000126098.1	2	---	ENSMUSP00000139885.1	Ptpn18-207	5	protein_coding
TetK27	chr1	34471831	34473840	2009	34472953	148	197.558	40.3098	194.382	TetK27_peak_120	Gm28417	ENSMUST00000185881.1	-	34471509	34473113	TSS	0	-322	0.799377	0.638308	---	ENSMUSG00000100280.2	Gm28417	processed_transcript	OTTMUSG00000049500.1	OTTMUST00000126226.1	2	---	---	Gm28417-202	3	antisense_RNA
TetK27	chr1	34479041	34480144	1103	34479405	39	31.822	10.8214	29.6171	TetK27_peak_121	4930568A12Rik	ENSMUST00000188292.6	-	34477167	34485612	Intron 4	5468	-1874	0.130713	1.000000	---	ENSMUSG00000101223.6	4930568A12Rik	lincRNA	OTTMUSG00000049473.1	OTTMUST00000126121.1	2	---	---	4930568A12Rik-202	1	lincRNA
TetK27	chr1	34480444	34481222	778	34480923	19	10.8823	5.41071	8.93972	TetK27_peak_122	4930568A12Rik	ENSMUST00000186117.1	-	34480982	34485934	TTS	4712	0	0.048657	0.309371	---	ENSMUSG00000101223.6	4930568A12Rik	lincRNA	OTTMUSG00000049473.1	OTTMUST00000126122.1	2	---	---	4930568A12Rik-201	3	lincRNA
TetK27	chr1	34489920	34490907	987	34490102	17	9.15743	4.86964	7.25158	TetK27_peak_123	.	.	.	.	.	Intergenic	.	.	.	.	.	.	.	.	.	.	.	.	.	.	.	.
TetK27	chr1	34491010	34491461	451	34491248	17	9.15743	4.86964	7.25158	TetK27_peak_124	.	.	.	.	.	Intergenic	.	.	.	.	.	.	.	.	.	.	.	.	.	.	.	.
TetK27	chr1	34505818	34506096	278	34505924	11	4.58302	3.24643	2.81413	TetK27_peak_125	.	.	.	.	.	Intergenic	.	.	.	.	.	.	.	.	.	.	.	.	.	.	.	.
TetK27	chr1	34510479	34511361	882	34510729	77	82.6091	21.1018	80.0461	TetK27_peak_126	.	.	.	.	.	Intergenic	.	.	.	.	.	.	.	.	.	.	.	.	.	.	.	.
TetK27	chr1	34801139	34803553	2414	34801854	200	217.129	26.942	213.844	TetK27_peak_127	Arhgef4	ENSMUST00000211073.1	+	34801794	34801965	TSS	0	0	1.000000	0.071222	---	ENSMUSG00000037509.20	Arhgef4	protein_coding	OTTMUSG00000033276.1	OTTMUST00000147528.1	2	---	ENSMUSP00000148067.1	Arhgef4-208		protein_coding
TetK27	chr1	34820816	34821067	251	34820913	11	4.58302	3.24643	2.81413	TetK27_peak_128	Fam168b	ENSMUST00000185469.6	-	34817352	34842986	Intron 3	21919	-3464	0.009830	1.000000	---	ENSMUSG00000037503.12	Fam168b	protein_coding	OTTMUSG00000021855.1	OTTMUST00000126204.1	2	---	ENSMUSP00000141150.1	Fam168b-207	3	nonsense_mediated_decay
TetK27	chr1	34822988	34823881	893	34823338	18	10.0089	5.14017	8.08393	TetK27_peak_129	Gm37127	ENSMUST00000192924.1	+	34823525	34826561	TSS	0	-2680	0.117550	0.399329	---	ENSMUSG00000104358.1	Gm37127	TEC	OTTMUSG00000049504.1	OTTMUST00000126222.1	2	---	---	Gm37127-201		TEC
TetK27	chr1	34824453	34825073	620	34824609	15	7.52498	4.32857	5.65872	TetK27_peak_130	Gm37127	ENSMUST00000192924.1	+	34823525	34826561	CDS Exon 1	928	-1488	0.204478	1.000000	---	ENSMUSG00000104358.1	Gm37127	TEC	OTTMUSG00000049504.1	OTTMUST00000126222.1	2	---	---	Gm37127-201		TEC
TetK27	chr1	34825566	34825976	410	34825812	13	5.51264	3.52388	3.71535	TetK27_peak_131	Gm37127	ENSMUST00000192924.1	+	34823525	34826561	TTS	2041	-585	0.135331	1.000000	---	ENSMUSG00000104358.1	Gm37127	TEC	OTTMUSG00000049504.1	OTTMUST00000126222.1	2	---	---	Gm37127-201		TEC
TetK27	chr1	34826175	34826484	309	34826316	16	7.21211	4.01869	5.36317	TetK27_peak_132	Gm37127	ENSMUST00000192924.1	+	34823525	34826561	TTS	2650	-77	0.102074	1.000000	---	ENSMUSG00000104358.1	Gm37127	TEC	OTTMUSG00000049504.1	OTTMUST00000126222.1	2	---	---	Gm37127-201		TEC
TetK27	chr1	34827734	34828430	696	34828208	20	11.7766	5.68125	9.81736	TetK27_peak_133	Fam168b	ENSMUST00000185469.6	-	34817352	34842986	Intron 3	14556	-10382	0.027189	1.000000	---	ENSMUSG00000037503.12	Fam168b	protein_coding	OTTMUSG00000021855.1	OTTMUST00000126204.1	2	---	ENSMUSP00000141150.1	Fam168b-207	3	nonsense_mediated_decay
TetK27	chr1	34828529	34828853	324	34828743	14	6.74667	4.05803	4.90229	TetK27_peak_134	Fam168b	ENSMUST00000140534.1	-	34828642	34843066	TTS	14213	0	0.014697	0.652308	---	ENSMUSG00000037503.12	Fam168b	protein_coding	OTTMUSG00000021855.1	OTTMUST00000051862.1	2	---	---	Fam168b-202	2	retained_intron
TetK27	chr1	34829395	34829646	251	34829551	12	5.2738	3.51696	3.47795	TetK27_peak_135	Fam168b	ENSMUST00000140534.1	-	34828642	34843066	TTS	13420	-753	0.017470	1.000000	---	ENSMUSG00000037503.12	Fam168b	protein_coding	OTTMUSG00000021855.1	OTTMUST00000051862.1	2	---	---	Fam168b-202	2	retained_intron
TetK27	chr1	34829778	34833061	3283	34831912	47	41.563	12.9857	39.2757	TetK27_peak_136	Fam168b	ENSMUST00000140534.1	-	34828642	34843066	Intron 2	10005	-1136	0.227660	1.000000	---	ENSMUSG00000037503.12	Fam168b	protein_coding	OTTMUSG00000021855.1	OTTMUST00000051862.1	2	---	---	Fam168b-202	2	retained_intron
TetK27	chr1	34833301	34833560	259	34833511	13	5.99569	3.7875	4.17465	TetK27_peak_137	Fam168b	ENSMUST00000140534.1	-	34828642	34843066	Intron 2	9506	-4659	0.018024	1.000000	---	ENSMUSG00000037503.12	Fam168b	protein_coding	OTTMUSG00000021855.1	OTTMUST00000051862.1	2	---	---	Fam168b-202	2	retained_intron
TetK27	chr1	34834432	34834816	384	34834582	13	5.99569	3.7875	4.17465	TetK27_peak_138	Fam168b	ENSMUST00000140534.1	-	34828642	34843066	Intron 2	8250	-5790	0.026690	1.000000	---	ENSMUSG00000037503.12	Fam168b	protein_coding	OTTMUSG00000021855.1	OTTMUST00000051862.1	2	---	---	Fam168b-202	2	retained_intron
TetK27	chr1	34834936	34835681	745	34835471	16	8.32904	4.5991	6.44257	TetK27_peak_139	Fam168b	ENSMUST00000140534.1	-	34828642	34843066	Intron 2	7385	-6294	0.051716	1.000000	---	ENSMUSG00000037503.12	Fam168b	protein_coding	OTTMUSG00000021855.1	OTTMUST00000051862.1	2	---	---	Fam168b-202	2	retained_intron
TetK27	chr1	34836285	34836644	359	34836458	20	11.7766	5.68125	9.81736	TetK27_peak_140	Fam168b	ENSMUST00000140534.1	-	34828642	34843066	Intron 2	6422	-7643	0.024957	1.000000	---	ENSMUSG00000037503.12	Fam168b	protein_coding	OTTMUSG00000021855.1	OTTMUST00000051862.1	2	---	---	Fam168b-202	2	retained_intron
TetK27	chr1	34837893	34838144	251	34838005	12	5.2738	3.51696	3.47795	TetK27_peak_141	Fam168b	ENSMUST00000185469.6	-	34817352	34842986	5' UTR Exon	4842	-20541	0.009830	1.000000	---	ENSMUSG00000037503.12	Fam168b	protein_coding	OTTMUSG00000021855.1	OTTMUST00000126204.1	2	---	ENSMUSP00000141150.1	Fam168b-207	3	nonsense_mediated_decay
TetK27	chr1	34840619	34841020	401	34840828	13	5.99569	3.7875	4.17465	TetK27_peak_142	Fam168b	ENSMUST00000185469.6	-	34817352	34842986	5' UTR Exon	1966	-23267	0.015682	1.000000	---	ENSMUSG00000037503.12	Fam168b	protein_coding	OTTMUSG00000021855.1	OTTMUST00000126204.1	2	---	ENSMUSP00000141150.1	Fam168b-207	3	nonsense_mediated_decay
TetK27	chr1	34841542	34844743	3201	34842962	242	323.519	45.7888	319.498	TetK27_peak_143	Fam168b	ENSMUST00000047534.11	-	34813226	34843066	TSS	0	-28316	0.051104	0.476265	CCDS14873.1	ENSMUSG00000037503.12	Fam168b	protein_coding	OTTMUSG00000021855.1	OTTMUST00000051861.1	2	---	ENSMUSP00000042212.5	Fam168b-201	1	protein_coding
TetK27	chr1	34847834	34853785	5951	34850026	273	341.469	39.5834	337.285	TetK27_peak_144	Plekhb2	ENSMUST00000152654.2	+	34851837	34863476	TSS	0	-9691	0.167440	0.327453	---	ENSMUSG00000026123.11	Plekhb2	protein_coding	OTTMUSG00000029565.1	OTTMUST00000073324.1	2	---	ENSMUSP00000116777.1	Plekhb2-202	5	protein_coding
TetK27	chr1	34855065	34855597	532	34855432	14	6.74667	4.05803	4.90229	TetK27_peak_145	Plekhb2	ENSMUST00000152654.2	+	34851837	34863476	5' UTR Exon	3228	-7879	0.045790	1.000000	---	ENSMUSG00000026123.11	Plekhb2	protein_coding	OTTMUSG00000029565.1	OTTMUST00000073324.1	2	---	ENSMUSP00000116777.1	Plekhb2-202	5	protein_coding
TetK27	chr1	34858553	34858975	422	34858737	16	7.44726	4.13824	5.5971	TetK27_peak_146	Plekhb2	ENSMUST00000152654.2	+	34851837	34863476	5' UTR Exon	6716	-4501	0.036340	1.000000	---	ENSMUSG00000026123.11	Plekhb2	protein_coding	OTTMUSG00000029565.1	OTTMUST00000073324.1	2	---	ENSMUSP00000116777.1	Plekhb2-202	5	protein_coding
TetK27	chr1	34859302	34859591	289	34859480	16	8.32904	4.5991	6.44257	TetK27_peak_147	Plekhb2	ENSMUST00000152654.2	+	34851837	34863476	5' UTR Exon	7465	-3885	0.024914	1.000000	---	ENSMUSG00000026123.11	Plekhb2	protein_coding	OTTMUSG00000029565.1	OTTMUST00000073324.1	2	---	ENSMUSP00000116777.1	Plekhb2-202	5	protein_coding
TetK27	chr1	35579663	35580747	1084	35580400	26	17.5331	7.30446	15.4838	TetK27_peak_148	.	.	.	.	.	Intergenic	.	.	.	.	.	.	.	.	.	.	.	.	.	.	.	.
TetK27	chr1	35650678	35651250	572	35651064	13	5.99569	3.7875	4.17465	TetK27_peak_149	Gm37068	ENSMUST00000195168.1	-	35625606	35651298	TSS	48	-25072	0.022302	1.000000	---	ENSMUSG00000104417.1	Gm37068	lincRNA	OTTMUSG00000050187.1	OTTMUST00000127553.1	2	---	---	Gm37068-201	3	lincRNA
TetK27	chr1	35652232	35652496	264	35652420	13	5.99569	3.7875	4.17465	TetK27_peak_150	Gm37068	ENSMUST00000195168.1	-	35625606	35651298	TSS	-934	-26626	0.000000	0.000000	---	ENSMUSG00000104417.1	Gm37068	lincRNA	OTTMUSG00000050187.1	OTTMUST00000127553.1	2	---	---	Gm37068-201	3	lincRNA
TetK27	chr1	35652700	35653974	1274	35653328	40	33.0047	11.092	30.7894	TetK27_peak_151	.	.	.	.	.	Intergenic	.	.	.	.	.	.	.	.	.	.	.	.	.	.	.	.
TetK27	chr1	35654560	35655224	664	35654859	18	10.0089	5.14017	8.08393	TetK27_peak_152	.	.	.	.	.	Intergenic	.	.	.	.	.	.	.	.	.	.	.	.	.	.	.	.
TetK27	chr1	35708426	35708772	346	35708656	11	4.58302	3.24643	2.81413	TetK27_peak_153	.	.	.	.	.	Intergenic	.	.	.	.	.	.	.	.	.	.	.	.	.	.	.	.
TetK27	chr1	35890201	35891112	911	35890593	20	11.7766	5.68125	9.81736	TetK27_peak_154	.	.	.	.	.	Intergenic	.	.	.	.	.	.	.	.	.	.	.	.	.	.	.	.
TetK27	chr1	35936706	35937009	303	35936904	17	9.15743	4.86964	7.25158	TetK27_peak_155	.	.	.	.	.	Intergenic	.	.	.	.	.	.	.	.	.	.	.	.	.	.	.	.
TetK27	chr1	36064531	36065305	774	36064912	40	32.8003	10.993	30.5925	TetK27_peak_156	.	.	.	.	.	Intergenic	.	.	.	.	.	.	.	.	.	.	.	.	.	.	.	.
TetK27	chr1	36067871	36069688	1817	36068599	169	156.127	18.7316	153.171	TetK27_peak_157	Hs6st1	ENSMUST00000088174.3	+	36068400	36106447	TSS	0	-36759	0.033878	0.709021	CCDS48237.1	ENSMUSG00000045216.7	Hs6st1	protein_coding	OTTMUSG00000029555.1	OTTMUST00000073283.1	2	---	ENSMUSP00000085499.3	Hs6st1-201	1	protein_coding
TetK27	chr1	36148848	36149736	888	36149071	30	21.6938	8.3866	19.5925	TetK27_peak_158	Uggt1	ENSMUST00000174266.7	-	36143486	36244162	3' UTR Exon	94426	-5362	0.008830	1.000000	---	ENSMUSG00000037470.14	Uggt1	protein_coding	OTTMUSG00000037695.1	OTTMUST00000097356.1	2	---	ENSMUSP00000134640.1	Uggt1-209	1	nonsense_mediated_decay
TetK27	chr1	36160245	36161250	1005	36160451	34	26.0742	9.46874	23.926	TetK27_peak_159	Uggt1	ENSMUST00000174266.7	-	36143486	36244162	3' UTR Exon	82912	-16759	0.009992	1.000000	---	ENSMUSG00000037470.14	Uggt1	protein_coding	OTTMUSG00000037695.1	OTTMUST00000097356.1	2	---	ENSMUSP00000134640.1	Uggt1-209	1	nonsense_mediated_decay
TetK27	chr1	36234493	36236812	2319	36235643	49	44.0915	13.5268	41.7838	TetK27_peak_160	Uggt1	ENSMUST00000174716.7	-	36178605	36244108	CDS Exon 2	7296	-55888	0.035418	1.000000	---	ENSMUSG00000037470.14	Uggt1	protein_coding	OTTMUSG00000037695.1	OTTMUST00000097360.1	2	---	---	Uggt1-210	1	retained_intron
TetK27	chr1	36241535	36244862	3327	36244052	169	200.911	32.0333	197.719	TetK27_peak_161	Uggt1	ENSMUST00000174716.7	-	36178605	36244108	TSS	0	-62930	0.039295	0.773438	---	ENSMUSG00000037470.14	Uggt1	protein_coding	OTTMUSG00000037695.1	OTTMUST00000097360.1	2	---	---	Uggt1-210	1	retained_intron
TetK27	chr1	36257333	36257749	416	36257501	16	8.32904	4.5991	6.44257	TetK27_peak_162	.	.	.	.	.	Intergenic	.	.	.	.	.	.	.	.	.	.	.	.	.	.	.	.
TetK27	chr1	36260417	36262647	2230	36262111	54	50.5604	14.8795	48.2044	TetK27_peak_163	.	.	.	.	.	Intergenic	.	.	.	.	.	.	.	.	.	.	.	.	.	.	.	.
TetK27	chr1	36262710	36263293	583	36262945	19	10.8647	5.40157	8.93398	TetK27_peak_164	.	.	.	.	.	Intergenic	.	.	.	.	.	.	.	.	.	.	.	.	.	.	.	.
TetK27	chr1	36263469	36267685	4216	36264138	104	123.962	28.4062	121.172	TetK27_peak_165	Neurl3	ENSMUST00000056946.7	-	36264597	36273436	TTS	5751	0	0.349434	0.732511	CCDS14875.1	ENSMUSG00000047180.8	Neurl3	protein_coding	OTTMUSG00000045459.1	OTTMUST00000119250.1	2	---	ENSMUSP00000055437.6	Neurl3-201	1	protein_coding
TetK27	chr1	36270373	36271734	1361	36271440	23	11.5306	5.03292	9.58365	TetK27_peak_166	Neurl3	ENSMUST00000056946.7	-	36264597	36273436	Intron 1	1702	-5776	0.154072	1.000000	CCDS14875.1	ENSMUSG00000047180.8	Neurl3	protein_coding	OTTMUSG00000045459.1	OTTMUST00000119250.1	2	---	ENSMUSP00000055437.6	Neurl3-201	1	protein_coding
TetK27	chr1	36271786	36275120	3334	36273245	161	197.375	33.9722	194.202	TetK27_peak_167	Neurl3	ENSMUST00000056946.7	-	36264597	36273436	TSS	0	-7189	0.186765	0.495052	CCDS14875.1	ENSMUSG00000047180.8	Neurl3	protein_coding	OTTMUSG00000045459.1	OTTMUST00000119250.1	2	---	ENSMUSP00000055437.6	Neurl3-201	1	protein_coding
TetK27	chr1	36281777	36282402	625	36282158	16	8.00916	4.42967	6.13838	TetK27_peak_168	.	.	.	.	.	Intergenic	.	.	.	.	.	.	.	.	.	.	.	.	.	.	.	.
TetK27	chr1	36287277	36287805	528	36287751	23	5.36178	2.64446	3.56546	TetK27_peak_169	.	.	.	.	.	Intergenic	.	.	.	.	.	.	.	.	.	.	.	.	.	.	.	.
TetK27	chr1	36293332	36293619	287	36293569	11	4.58302	3.24643	2.81413	TetK27_peak_170	.	.	.	.	.	Intergenic	.	.	.	.	.	.	.	.	.	.	.	.	.	.	.	.
TetK27	chr1	36293909	36295018	1109	36294805	24	15.5448	6.76339	13.5242	TetK27_peak_171	.	.	.	.	.	Intergenic	.	.	.	.	.	.	.	.	.	.	.	.	.	.	.	.
TetK27	chr1	36295098	36295408	310	36295247	16	8.32904	4.5991	6.44257	TetK27_peak_172	.	.	.	.	.	Intergenic	.	.	.	.	.	.	.	.	.	.	.	.	.	.	.	.
TetK27	chr1	36296243	36297444	1201	36296685	27	18.5511	7.57499	16.4886	TetK27_peak_173	.	.	.	.	.	Intergenic	.	.	.	.	.	.	.	.	.	.	.	.	.	.	.	.
TetK27	chr1	36303216	36303619	403	36303433	30	21.6938	8.3866	19.5925	TetK27_peak_174	.	.	.	.	.	Intergenic	.	.	.	.	.	.	.	.	.	.	.	.	.	.	.	.
TetK27	chr1	36307079	36310674	3595	36307848	253	393.867	68.716	389.17	TetK27_peak_175	Arid5a	ENSMUST00000150747.7	+	36307754	36318289	TSS	0	-7615	0.277240	0.812291	---	ENSMUSG00000037447.16	Arid5a	protein_coding	OTTMUSG00000021515.1	OTTMUST00000051022.1	2	---	---	Arid5a-214	5	retained_intron
TetK27	chr1	36368306	36369508	1202	36368935	256	287.16	30.1035	283.43	TetK27_peak_176	Kansl3	ENSMUST00000187628.1	-	36365628	36368042	TSS	-264	-2678	0.000000	0.000000	---	ENSMUSG00000010453.12	Kansl3	protein_coding	OTTMUSG00000049477.1	OTTMUST00000126133.1	2	---	ENSMUSP00000140058.1	Kansl3-206	5	protein_coding
TetK27	chr1	36444587	36445607	1020	36445029	149	162.048	25.6614	159.06	TetK27_peak_177	Lman2l	ENSMUST00000115011.7	-	36423186	36445272	TSS	0	-21401	0.031059	0.671890	CCDS78563.1	ENSMUSG00000001143.13	Lman2l	protein_coding	OTTMUSG00000021558.1	OTTMUST00000051148.1	2	---	ENSMUSP00000110663.1	Lman2l-202	5	protein_coding
TetK27	chr1	36470765	36471568	803	36471248	151	181.164	31.8751	178.077	TetK27_peak_178	Cnnm4	ENSMUST00000153128.1	+	36471620	36508765	TSS	-52	-37197	0.000000	0.000000	CCDS14879.2	ENSMUSG00000037408.10	Cnnm4	protein_coding	OTTMUSG00000033420.1	OTTMUST00000083926.1	2	---	ENSMUSP00000121317.1	Cnnm4-201	1	protein_coding
TetK27	chr1	36471654	36472401	747	36471925	80	87.0265	21.9134	84.438	TetK27_peak_179	Cnnm4	ENSMUST00000153128.1	+	36471620	36508765	TSS	34	-36364	0.020137	1.000000	CCDS14879.2	ENSMUSG00000037408.10	Cnnm4	protein_coding	OTTMUSG00000033420.1	OTTMUST00000083926.1	2	---	ENSMUSP00000121317.1	Cnnm4-201	1	protein_coding
TetK27	chr1	36511391	36512905	1514	36512065	158	146.245	18.6243	143.341	TetK27_peak_180	Cnnm3	ENSMUST00000154225.1	+	36513097	36520436	TSS	-192	-7531	0.000000	0.000000	---	ENSMUSG00000001138.13	Cnnm3	protein_coding	OTTMUSG00000021763.1	OTTMUST00000051655.1	2	---	---	Cnnm3-204	3	retained_intron
TetK27	chr1	36546450	36547869	1419	36547071	125	140.4	26.4228	137.524	TetK27_peak_181	Ankrd39	ENSMUST00000208690.1	-	36541837	36547220	TSS	0	-4613	0.143202	0.542958	---	ENSMUSG00000079610.9	Ankrd39	protein_coding	OTTMUSG00000049837.1	OTTMUST00000126929.1	2	---	---	Ankrd39-206	2	processed_transcript
TetK27	chr1	36555505	36558959	3454	36556682	98	106.778	23.3317	104.08	TetK27_peak_182	Sema4c	ENSMUST00000191677.5	-	36548639	36558350	TSS	0	-6866	0.293040	0.823734	CCDS48240.1	ENSMUSG00000026121.13	Sema4c	protein_coding	OTTMUSG00000020876.1	OTTMUST00000049351.1	2	---	ENSMUSP00000141263.1	Sema4c-203	5	protein_coding
TetK27	chr1	36559405	36559656	251	36559524	11	4.18303	3.02047	2.44301	TetK27_peak_183	D430040D24Rik	ENSMUST00000194426.1	+	36557701	36559668	TTS	1704	-12	0.128049	1.000000	---	ENSMUSG00000087589.3	D430040D24Rik	processed_transcript	OTTMUSG00000021816.1	OTTMUST00000127462.1	2	---	---	D430040D24Rik-202		retained_intron
TetK27	chr1	36610301	36612730	2429	36611122	39	26.4593	8.38819	24.3094	TetK27_peak_184	Fam178b	ENSMUST00000114981.2	-	36599976	36683184	Intron 6	70454	-10325	0.029204	1.000000	CCDS14885.2	ENSMUSG00000046337.17	Fam178b	protein_coding	OTTMUSG00000021818.1	OTTMUST00000127237.1	2	---	ENSMUSP00000124023.1	Fam178b-201	1	protein_coding
TetK27	chr1	36645541	36646109	568	36645897	21	12.6908	5.95178	10.7156	TetK27_peak_185	Fam178b	ENSMUST00000114981.2	-	36599976	36683184	Intron 3	37075	-45565	0.006838	1.000000	CCDS14885.2	ENSMUSG00000046337.17	Fam178b	protein_coding	OTTMUSG00000021818.1	OTTMUST00000127237.1	2	---	ENSMUSP00000124023.1	Fam178b-201	1	protein_coding
TetK27	chr1	36646285	36647003	718	36646814	22	11.6542	5.2532	9.70686	TetK27_peak_186	Fam178b	ENSMUST00000114981.2	-	36599976	36683184	Intron 3	36181	-46309	0.008641	1.000000	CCDS14885.2	ENSMUSG00000046337.17	Fam178b	protein_coding	OTTMUSG00000021818.1	OTTMUST00000127237.1	2	---	ENSMUSP00000124023.1	Fam178b-201	1	protein_coding
TetK27	chr1	36690769	36692669	1900	36691701	244	314.728	41.9136	310.78	TetK27_peak_187	Cox5b	ENSMUST00000191790.5	+	36691628	36692551	TSS	0	0	1.000000	0.486060	---	ENSMUSG00000061518.10	Cox5b	protein_coding	OTTMUSG00000049480.1	OTTMUST00000126140.1	2	---	---	Cox5b-202	3	retained_intron
TetK27	chr1	36708600	36710674	2074	36709753	264	415.693	71.6919	410.753	TetK27_peak_188	Actr1b	ENSMUST00000162684.2	-	36701672	36709948	TSS	0	-6928	0.162982	0.650120	---	ENSMUSG00000037351.9	Actr1b	protein_coding	OTTMUSG00000034164.1	OTTMUST00000126144.1	2	---	---	Actr1b-207	3	retained_intron
TetK27	chr1	36722675	36723169	494	36722986	16	8.32904	4.5991	6.44257	TetK27_peak_189	4933424G06Rik	ENSMUST00000192873.2	+	36710149	36733882	Intron 2	12526	-10713	0.020856	1.000000	---	ENSMUSG00000102416.4	4933424G06Rik	protein_coding	OTTMUSG00000049901.1	OTTMUST00000127608.1	2	---	ENSMUSP00000147230.1	4933424G06Rik-201	5	protein_coding
TetK27	chr1	36723437	36724047	610	36723668	18	9.99233	5.13149	8.07998	TetK27_peak_190	4933424G06Rik	ENSMUST00000192873.2	+	36710149	36733882	CDS Exon 3	13288	-9835	0.025744	1.000000	---	ENSMUSG00000102416.4	4933424G06Rik	protein_coding	OTTMUSG00000049901.1	OTTMUST00000127608.1	2	---	ENSMUSP00000147230.1	4933424G06Rik-201	5	protein_coding
TetK27	chr1	36744387	36745036	649	36744589	19	10.4964	5.21137	8.56813	TetK27_peak_191	Gm33533	ENSMUST00000193853.1	-	36739048	36744793	TSS	0	-5339	0.070832	0.626154	---	ENSMUSG00000104237.1	Gm33533	lincRNA	OTTMUSG00000049902.1	OTTMUST00000127046.1	2	---	---	Gm33533-201	1	lincRNA
TetK27	chr1	36759397	36773230	13833	36762089	298	484.074	80.7534	478.211	TetK27_peak_192	Gm18828	ENSMUST00000181035.1	-	36764863	36765173	TSS	0	0	1.000000	0.022481	---	ENSMUSG00000097291.1	Gm18828	transcribed_processed_pseudogene	OTTMUSG00000042714.1	OTTMUST00000112447.1	2	---	---	Gm18828-202		processed_transcript
TetK27	chr1	36773477	36774722	1245	36774249	24	15.5448	6.76339	13.5242	TetK27_peak_193	Zap70	ENSMUST00000027291.6	+	36761798	36782819	Intron 3	11679	-8097	0.059271	1.000000	CCDS14888.1	ENSMUSG00000026117.10	Zap70	protein_coding	OTTMUSG00000049481.1	OTTMUST00000126145.1	2	---	ENSMUSP00000027291.4	Zap70-201	1	protein_coding
TetK27	chr1	36774882	36775214	332	36775074	19	10.8823	5.41071	8.93972	TetK27_peak_194	Zap70	ENSMUST00000027291.6	+	36761798	36782819	Intron 3	13084	-7605	0.015841	1.000000	CCDS14888.1	ENSMUSG00000026117.10	Zap70	protein_coding	OTTMUSG00000049481.1	OTTMUST00000126145.1	2	---	ENSMUSP00000027291.4	Zap70-201	1	protein_coding
TetK27	chr1	36775435	36775771	336	36775658	19	10.8823	5.41071	8.93972	TetK27_peak_195	Zap70	ENSMUST00000027291.6	+	36761798	36782819	Intron 3	13637	-7048	0.016031	1.000000	CCDS14888.1	ENSMUSG00000026117.10	Zap70	protein_coding	OTTMUSG00000049481.1	OTTMUST00000126145.1	2	---	ENSMUSP00000027291.4	Zap70-201	1	protein_coding
TetK27	chr1	36776195	36778337	2142	36777151	23	12.9142	5.67344	10.9367	TetK27_peak_196	Zap70	ENSMUST00000190128.1	+	36778984	36782816	TSS	-647	-4479	0.000000	0.000000	---	ENSMUSG00000026117.10	Zap70	protein_coding	OTTMUSG00000049481.1	OTTMUST00000126149.1	2	---	---	Zap70-204	1	retained_intron
TetK27	chr1	36778460	36778975	515	36778777	15	7.22704	4.1691	5.37763	TetK27_peak_197	Zap70	ENSMUST00000190128.1	+	36778984	36782816	TSS	-9	-3841	0.000000	0.000000	---	ENSMUSG00000026117.10	Zap70	protein_coding	OTTMUSG00000049481.1	OTTMUST00000126149.1	2	---	---	Zap70-204	1	retained_intron
TetK27	chr1	36782714	36782998	284	36782827	12	5.2738	3.51696	3.47795	TetK27_peak_198	Zap70	ENSMUST00000027291.6	+	36761798	36782819	TTS	20916	0	0.005042	0.371930	CCDS14888.1	ENSMUSG00000026117.10	Zap70	protein_coding	OTTMUSG00000049481.1	OTTMUST00000126145.1	2	---	ENSMUSP00000027291.4	Zap70-201	1	protein_coding
TetK27	chr1	36793782	36794033	251	36793833	10	3.92564	2.97589	2.18676	TetK27_peak_199	Tmem131	ENSMUST00000194563.5	-	36792194	36939823	Intron 41	145790	-1588	0.001707	1.000000	CCDS35538.1	ENSMUSG00000026116.11	Tmem131	protein_coding	OTTMUSG00000049482.1	OTTMUST00000126150.1	2	---	ENSMUSP00000142307.1	Tmem131-208	5	protein_coding
TetK27	chr1	36883123	36883539	416	36883293	15	7.52498	4.32857	5.65872	TetK27_peak_200	Tmem131	ENSMUST00000185964.2	-	36841672	36943667	5' UTR Exon	60128	-41451	0.004088	1.000000	---	ENSMUSG00000026116.11	Tmem131	protein_coding	OTTMUSG00000049482.1	OTTMUST00000126158.1	2	---	ENSMUSP00000141413.1	Tmem131-202	3	protein_coding
TetK27	chr1	36883901	36884883	982	36884032	23	12.878	5.65617	10.9017	TetK27_peak_201	Tmem131	ENSMUST00000185964.2	-	36841672	36943667	5' UTR Exon	58784	-42229	0.009638	1.000000	---	ENSMUSG00000026116.11	Tmem131	protein_coding	OTTMUSG00000049482.1	OTTMUST00000126158.1	2	---	ENSMUSP00000141413.1	Tmem131-202	3	protein_coding
TetK27	chr1	36884955	36885232	277	36885140	13	5.9841	3.7811	4.17465	TetK27_peak_202	Tmem131	ENSMUST00000185964.2	-	36841672	36943667	5' UTR Exon	58435	-43283	0.002726	1.000000	---	ENSMUSG00000026116.11	Tmem131	protein_coding	OTTMUSG00000049482.1	OTTMUST00000126158.1	2	---	ENSMUSP00000141413.1	Tmem131-202	3	protein_coding
TetK27	chr1	36885990	36886509	519	36886454	13	5.99569	3.7875	4.17465	TetK27_peak_203	Tmem131	ENSMUST00000185964.2	-	36841672	36943667	5' UTR Exon	57158	-44318	0.005098	1.000000	---	ENSMUSG00000026116.11	Tmem131	protein_coding	OTTMUSG00000049482.1	OTTMUST00000126158.1	2	---	ENSMUSP00000141413.1	Tmem131-202	3	protein_coding
TetK27	chr1	36886562	36887118	556	36886600	16	7.21211	4.01869	5.36317	TetK27_peak_204	Tmem131	ENSMUST00000185964.2	-	36841672	36943667	5' UTR Exon	56549	-44890	0.005461	1.000000	---	ENSMUSG00000026116.11	Tmem131	protein_coding	OTTMUSG00000049482.1	OTTMUST00000126158.1	2	---	ENSMUSP00000141413.1	Tmem131-202	3	protein_coding
TetK27	chr1	36887784	36888298	514	36888128	14	6.74667	4.05803	4.90229	TetK27_peak_205	Tmem131	ENSMUST00000185964.2	-	36841672	36943667	5' UTR Exon	55369	-46112	0.005049	1.000000	---	ENSMUSG00000026116.11	Tmem131	protein_coding	OTTMUSG00000049482.1	OTTMUST00000126158.1	2	---	ENSMUSP00000141413.1	Tmem131-202	3	protein_coding
TetK27	chr1	36909161	36911973	2812	36910007	76	75.3354	18.2023	72.8201	TetK27_peak_206	Tmem131	ENSMUST00000185964.2	-	36841672	36943667	5' UTR Exon	31694	-67489	0.027580	1.000000	---	ENSMUSG00000026116.11	Tmem131	protein_coding	OTTMUSG00000049482.1	OTTMUST00000126158.1	2	---	ENSMUSP00000141413.1	Tmem131-202	3	protein_coding
TetK27	chr1	36914450	36916126	1676	36914691	22	9.61192	4.33391	7.70213	TetK27_peak_207	Gm38115	ENSMUST00000194317.1	-	36913601	36916540	TTS	414	-849	0.570408	1.000000	---	ENSMUSG00000102930.1	Gm38115	sense_intronic	OTTMUSG00000049955.1	OTTMUST00000127138.1	2	---	---	Gm38115-201	5	sense_intronic
TetK27	chr1	36916192	36916614	422	36916413	15	7.52498	4.32857	5.65872	TetK27_peak_208	Gm38115	ENSMUST00000194317.1	-	36913601	36916540	TSS	0	-2591	0.118707	0.825059	---	ENSMUSG00000102930.1	Gm38115	sense_intronic	OTTMUSG00000049955.1	OTTMUST00000127138.1	2	---	---	Gm38115-201	5	sense_intronic
TetK27	chr1	36916850	36923459	6609	36920253	109	131.975	29.7589	129.143	TetK27_peak_209	Gm38115	ENSMUST00000194317.1	-	36913601	36916540	TSS	-310	-3249	0.000000	0.000000	---	ENSMUSG00000102930.1	Gm38115	sense_intronic	OTTMUSG00000049955.1	OTTMUST00000127138.1	2	---	---	Gm38115-201	5	sense_intronic
TetK27	chr1	36923667	36924057	390	36923871	17	9.15743	4.86964	7.25158	TetK27_peak_210	F830112A20Rik	ENSMUST00000194249.1	-	36922797	36926349	TTS	2292	-870	0.110048	1.000000	---	ENSMUSG00000103159.1	F830112A20Rik	TEC	OTTMUSG00000049984.1	OTTMUST00000127192.1	2	---	---	F830112A20Rik-201		TEC
TetK27	chr1	36924203	36925448	1245	36924746	24	15.5448	6.76339	13.5242	TetK27_peak_211	F830112A20Rik	ENSMUST00000194249.1	-	36922797	36926349	CDS Exon 1	901	-1406	0.350690	1.000000	---	ENSMUSG00000103159.1	F830112A20Rik	TEC	OTTMUSG00000049984.1	OTTMUST00000127192.1	2	---	---	F830112A20Rik-201		TEC
TetK27	chr1	36925782	36926310	528	36926063	18	10.0089	5.14017	8.08393	TetK27_peak_212	F830112A20Rik	ENSMUST00000194249.1	-	36922797	36926349	TSS	39	-2985	0.148888	1.000000	---	ENSMUSG00000103159.1	F830112A20Rik	TEC	OTTMUSG00000049984.1	OTTMUST00000127192.1	2	---	---	F830112A20Rik-201		TEC
TetK27	chr1	36928245	36928602	357	36928434	21	12.6712	5.94172	10.7067	TetK27_peak_213	Tmem131	ENSMUST00000185964.2	-	36841672	36943667	5' UTR Exon	15065	-86573	0.003510	1.000000	---	ENSMUSG00000026116.11	Tmem131	protein_coding	OTTMUSG00000049482.1	OTTMUST00000126158.1	2	---	ENSMUSP00000141413.1	Tmem131-202	3	protein_coding
TetK27	chr1	36928675	36929270	595	36928893	18	10.0089	5.14017	8.08393	TetK27_peak_214	Tmem131	ENSMUST00000185964.2	-	36841672	36943667	5' UTR Exon	14397	-87003	0.005843	1.000000	---	ENSMUSG00000026116.11	Tmem131	protein_coding	OTTMUSG00000049482.1	OTTMUST00000126158.1	2	---	ENSMUSP00000141413.1	Tmem131-202	3	protein_coding
TetK27	chr1	36929573	36930384	811	36930107	21	12.6908	5.95178	10.7156	TetK27_peak_215	Tmem131	ENSMUST00000185964.2	-	36841672	36943667	5' UTR Exon	13283	-87901	0.007961	1.000000	---	ENSMUSG00000026116.11	Tmem131	protein_coding	OTTMUSG00000049482.1	OTTMUST00000126158.1	2	---	ENSMUSP00000141413.1	Tmem131-202	3	protein_coding
TetK27	chr1	36930999	36931269	270	36931184	12	5.2738	3.51696	3.47795	TetK27_peak_216	Tmem131	ENSMUST00000185964.2	-	36841672	36943667	5' UTR Exon	12398	-89327	0.002657	1.000000	---	ENSMUSG00000026116.11	Tmem131	protein_coding	OTTMUSG00000049482.1	OTTMUST00000126158.1	2	---	ENSMUSP00000141413.1	Tmem131-202	3	protein_coding
TetK27	chr1	36931991	36932451	460	36932235	14	6.74667	4.05803	4.90229	TetK27_peak_217	Tmem131	ENSMUST00000185964.2	-	36841672	36943667	5' UTR Exon	11216	-90319	0.004520	1.000000	---	ENSMUSG00000026116.11	Tmem131	protein_coding	OTTMUSG00000049482.1	OTTMUST00000126158.1	2	---	ENSMUSP00000141413.1	Tmem131-202	3	protein_coding
TetK27	chr1	36934676	36934927	251	36934806	15	6.48548	3.7823	4.65898	TetK27_peak_218	Tmem131	ENSMUST00000185964.2	-	36841672	36943667	5' UTR Exon	8740	-93004	0.002471	1.000000	---	ENSMUSG00000026116.11	Tmem131	protein_coding	OTTMUSG00000049482.1	OTTMUST00000126158.1	2	---	ENSMUSP00000141413.1	Tmem131-202	3	protein_coding
TetK27	chr1	36936687	36936940	253	36936765	12	5.2738	3.51696	3.47795	TetK27_peak_219	Tmem131	ENSMUST00000185964.2	-	36841672	36943667	5' UTR Exon	6727	-95015	0.002490	1.000000	---	ENSMUSG00000026116.11	Tmem131	protein_coding	OTTMUSG00000049482.1	OTTMUST00000126158.1	2	---	ENSMUSP00000141413.1	Tmem131-202	3	protein_coding
TetK27	chr1	36938123	36940625	2502	36939388	251	302.381	35.5886	298.534	TetK27_peak_220	Tmem131	ENSMUST00000194563.5	-	36792194	36939823	TSS	0	-145929	0.011522	0.679584	CCDS35538.1	ENSMUSG00000026116.11	Tmem131	protein_coding	OTTMUSG00000049482.1	OTTMUST00000126150.1	2	---	ENSMUSP00000142307.1	Tmem131-208	5	protein_coding
TetK27	chr1	36960522	36960980	458	36960746	25	16.5309	7.03392	14.4964	TetK27_peak_221	.	.	.	.	.	Intergenic	.	.	.	.	.	.	.	.	.	.	.	.	.	.	.	.
TetK27	chr1	36987242	36987586	344	36987357	16	8.32904	4.5991	6.44257	TetK27_peak_222	.	.	.	.	.	Intergenic	.	.	.	.	.	.	.	.	.	.	.	.	.	.	.	.
TetK27	chr1	36999696	37001088	1392	37000659	74	78.2415	20.2902	75.705	TetK27_peak_223	.	.	.	.	.	Intergenic	.	.	.	.	.	.	.	.	.	.	.	.	.	.	.	.
TetK27	chr1	37001246	37003159	1913	37002263	32	23.8582	8.92767	21.733	TetK27_peak_224	.	.	.	.	.	Intergenic	.	.	.	.	.	.	.	.	.	.	.	.	.	.	.	.
TetK27	chr1	37003401	37003655	254	37003526	12	5.2738	3.51696	3.47795	TetK27_peak_225	.	.	.	.	.	Intergenic	.	.	.	.	.	.	.	.	.	.	.	.	.	.	.	.
TetK27	chr1	37028608	37029857	1249	37029397	45	35.6878	10.8741	33.4498	TetK27_peak_226	Vwa3b	ENSMUST00000067178.13	+	37029316	37076996	TSS	0	-47139	0.011367	0.433600	---	ENSMUSG00000050122.18	Vwa3b	protein_coding	OTTMUSG00000029372.1	OTTMUST00000072823.1	2	---	ENSMUSP00000069700.7	Vwa3b-202	2	protein_coding
TetK27	chr1	37113299	37114734	1435	37113808	51	46.6545	14.0678	44.327	TetK27_peak_227	Vwa3b	ENSMUST00000194048.1	+	37100668	37129020	CDS Exon 2	12631	-14286	0.050647	1.000000	---	ENSMUSG00000050122.18	Vwa3b	protein_coding	OTTMUSG00000029372.1	OTTMUST00000127466.1	2	---	---	Vwa3b-207	3	processed_transcript
TetK27	chr1	37117042	37117528	486	37117390	11	4.58302	3.24643	2.81413	TetK27_peak_228	Vwa3b	ENSMUST00000194048.1	+	37100668	37129020	Intron 3	16374	-11492	0.017176	1.000000	---	ENSMUSG00000050122.18	Vwa3b	protein_coding	OTTMUSG00000029372.1	OTTMUST00000127466.1	2	---	---	Vwa3b-207	3	processed_transcript
TetK27	chr1	37299282	37301587	2305	37300130	203	256.613	38.4399	253.089	TetK27_peak_229	Inpp4a	ENSMUST00000132401.7	+	37300308	37408290	TSS	0	-106703	0.011854	0.555074	---	ENSMUSG00000026113.17	Inpp4a	protein_coding	OTTMUSG00000033181.1	OTTMUST00000083011.1	2	---	ENSMUSP00000123071.1	Inpp4a-205	5	protein_coding
TetK27	chr1	37302018	37304318	2300	37303520	29	20.6319	8.11607	18.5431	TetK27_peak_230	Inpp4a	ENSMUST00000193024.1	+	37299893	37302767	TTS	2125	0	0.260870	0.325945	---	ENSMUSG00000026113.17	Inpp4a	protein_coding	OTTMUSG00000033181.1	OTTMUST00000127874.1	2	---	---	Inpp4a-212		retained_intron
TetK27	chr1	37304418	37304669	251	37304589	10	3.2703	2.60033	1.59675	TetK27_peak_231	Inpp4a	ENSMUST00000140264.7	+	37299915	37399558	5' UTR Exon	4503	-94889	0.002529	1.000000	---	ENSMUSG00000026113.17	Inpp4a	protein_coding	OTTMUSG00000033181.1	OTTMUST00000127875.1	2	---	ENSMUSP00000121107.2	Inpp4a-209	1	protein_coding
TetK27	chr1	37305614	37306110	496	37305860	13	5.99569	3.7875	4.17465	TetK27_peak_232	Inpp4a	ENSMUST00000140264.7	+	37299915	37399558	5' UTR Exon	5699	-93448	0.004988	1.000000	---	ENSMUSG00000026113.17	Inpp4a	protein_coding	OTTMUSG00000033181.1	OTTMUST00000127875.1	2	---	ENSMUSP00000121107.2	Inpp4a-209	1	protein_coding
TetK27	chr1	37306523	37310058	3535	37307778	39	31.822	10.8214	29.6171	TetK27_peak_233	Inpp4a	ENSMUST00000140264.7	+	37299915	37399558	5' UTR Exon	6608	-89500	0.035486	1.000000	---	ENSMUSG00000026113.17	Inpp4a	protein_coding	OTTMUSG00000033181.1	OTTMUST00000127875.1	2	---	ENSMUSP00000121107.2	Inpp4a-209	1	protein_coding
TetK27	chr1	37310115	37311935	1820	37310356	36	28.339	10.0098	26.168	TetK27_peak_234	Inpp4a	ENSMUST00000140264.7	+	37299915	37399558	5' UTR Exon	10200	-87623	0.018275	1.000000	---	ENSMUSG00000026113.17	Inpp4a	protein_coding	OTTMUSG00000033181.1	OTTMUST00000127875.1	2	---	ENSMUSP00000121107.2	Inpp4a-209	1	protein_coding
TetK27	chr1	37312101	37312469	368	37312256	13	5.99569	3.7875	4.17465	TetK27_peak_235	Inpp4a	ENSMUST00000140264.7	+	37299915	37399558	5' UTR Exon	12186	-87089	0.003703	1.000000	---	ENSMUSG00000026113.17	Inpp4a	protein_coding	OTTMUSG00000033181.1	OTTMUST00000127875.1	2	---	ENSMUSP00000121107.2	Inpp4a-209	1	protein_coding
TetK27	chr1	37313117	37313368	251	37313294	14	3.90004	2.61798	2.18676	TetK27_peak_236	Inpp4a	ENSMUST00000140264.7	+	37299915	37399558	5' UTR Exon	13202	-86190	0.002529	1.000000	---	ENSMUSG00000026113.17	Inpp4a	protein_coding	OTTMUSG00000033181.1	OTTMUST00000127875.1	2	---	ENSMUSP00000121107.2	Inpp4a-209	1	protein_coding
TetK27	chr1	37317766	37318107	341	37317834	11	4.58302	3.24643	2.81413	TetK27_peak_237	Inpp4a	ENSMUST00000140264.7	+	37299915	37399558	5' UTR Exon	17851	-81451	0.003432	1.000000	---	ENSMUSG00000026113.17	Inpp4a	protein_coding	OTTMUSG00000033181.1	OTTMUST00000127875.1	2	---	ENSMUSP00000121107.2	Inpp4a-209	1	protein_coding
TetK27	chr1	37351126	37351677	551	37351299	17	9.15743	4.86964	7.25158	TetK27_peak_238	Inpp4a	ENSMUST00000140264.7	+	37299915	37399558	5' UTR Exon	51211	-47881	0.005540	1.000000	---	ENSMUSG00000026113.17	Inpp4a	protein_coding	OTTMUSG00000033181.1	OTTMUST00000127875.1	2	---	ENSMUSP00000121107.2	Inpp4a-209	1	protein_coding
TetK27	chr1	37396642	37396893	251	37396752	10	3.92564	2.97589	2.18676	TetK27_peak_239	Inpp4a	ENSMUST00000140264.7	+	37299915	37399558	Intron 23	96727	-2665	0.002529	1.000000	---	ENSMUSG00000026113.17	Inpp4a	protein_coding	OTTMUSG00000033181.1	OTTMUST00000127875.1	2	---	ENSMUSP00000121107.2	Inpp4a-209	1	protein_coding
TetK27	chr1	37419328	37419598	270	37419517	13	5.99569	3.7875	4.17465	TetK27_peak_240	Coa5	ENSMUST00000027286.6	-	37417084	37430104	3' UTR Exon	10506	-2244	0.020813	1.000000	CCDS35541.1	ENSMUSG00000026112.7	Coa5	protein_coding	OTTMUSG00000022117.1	OTTMUST00000052497.1	2	---	ENSMUSP00000027286.6	Coa5-201	1	protein_coding
TetK27	chr1	37428735	37431606	2871	37430338	289	415.25	57.3809	410.317	TetK27_peak_241	Unc50	ENSMUST00000118059.2	+	37430202	37438988	TSS	0	-7382	0.159895	0.489206	CCDS14892.1	ENSMUSG00000026111.15	Unc50	protein_coding	OTTMUSG00000021774.1	OTTMUST00000075443.1	2	---	ENSMUSP00000113135.1	Unc50-203	5	protein_coding
TetK27	chr1	37473087	37474470	1383	37473387	26	17.5331	7.30446	15.4838	TetK27_peak_242	Mgat4a	ENSMUST00000149791.7	-	37462913	37496134	Intron 2	21664	-10174	0.041659	1.000000	---	ENSMUSG00000026110.15	Mgat4a	protein_coding	OTTMUSG00000033899.1	OTTMUST00000085538.1	2	---	ENSMUSP00000115778.1	Mgat4a-204	5	nonsense_mediated_decay
TetK27	chr1	37478060	37478654	594	37478407	29	20.0252	7.81706	17.9478	TetK27_peak_243	Mgat4a	ENSMUST00000149791.7	-	37462913	37496134	Intron 2	17480	-15147	0.017910	1.000000	---	ENSMUSG00000026110.15	Mgat4a	protein_coding	OTTMUSG00000033899.1	OTTMUST00000085538.1	2	---	ENSMUSP00000115778.1	Mgat4a-204	5	nonsense_mediated_decay
TetK27	chr1	37495724	37496824	1100	37495961	45	39.0264	12.4236	36.7652	TetK27_peak_244	Mgat4a	ENSMUST00000149791.7	-	37462913	37496134	TSS	0	-32811	0.012371	0.373297	---	ENSMUSG00000026110.15	Mgat4a	protein_coding	OTTMUSG00000033899.1	OTTMUST00000085538.1	2	---	ENSMUSP00000115778.1	Mgat4a-204	5	nonsense_mediated_decay
TetK27	chr1	37540291	37541700	1409	37540849	93	72.6467	12.5997	70.1441	TetK27_peak_245	Mgat4a	ENSMUST00000151952.7	-	37439340	37541017	TSS	0	-100951	0.007150	0.515603	CCDS14893.1	ENSMUSG00000026110.15	Mgat4a	protein_coding	OTTMUSG00000033899.1	OTTMUST00000085506.1	2	---	ENSMUSP00000114175.1	Mgat4a-205	1	protein_coding
TetK27	chr1	37585724	37586376	652	37586135	18	10.0089	5.14017	8.08393	TetK27_peak_246	.	.	.	.	.	Intergenic	.	.	.	.	.	.	.	.	.	.	.	.	.	.	.	.
TetK27	chr1	37613898	37614864	966	37614338	26	12.7128	5.08764	10.7371	TetK27_peak_247	4930556I23Rik	ENSMUST00000160659.1	+	37614259	37615373	TSS	0	-509	0.543498	0.626680	---	ENSMUSG00000089767.1	4930556I23Rik	antisense_RNA	OTTMUSG00000030327.1	OTTMUST00000075119.1	2	---	---	4930556I23Rik-201	1	antisense_RNA
TetK27	chr1	37719410	37720208	798	37719764	31	14.2868	5.01275	12.2919	TetK27_peak_248	2010300C02Rik	ENSMUST00000160589.1	-	37637986	37719796	TSS	0	-81424	0.004730	0.484355	---	ENSMUSG00000026090.16	2010300C02Rik	protein_coding	OTTMUSG00000030326.1	OTTMUST00000075117.1	2	---	ENSMUSP00000124777.1	2010300C02Rik-202	1	protein_coding
TetK27	chr1	37864363	37866639	2276	37865428	93	88.2745	17.7125	85.6818	TetK27_peak_249	Tsga10	ENSMUST00000123082.7	-	37832403	37864837	TSS	0	-31960	0.014645	0.208608	---	ENSMUSG00000060771.14	Tsga10	protein_coding	OTTMUSG00000023825.1	OTTMUST00000058204.1	2	---	ENSMUSP00000141261.1	Tsga10-204	1	protein_coding
TetK27	chr1	37871568	37873071	1503	37872540	41	32.5342	10.5716	30.3267	TetK27_peak_250	Lipt1	ENSMUST00000144440.1	+	37872562	37875555	TSS	0	-2484	0.170341	0.339096	---	ENSMUSG00000037216.5	Lipt1	protein_coding	OTTMUSG00000022093.1	OTTMUST00000052449.1	2	---	ENSMUSP00000115465.1	Lipt1-204	3	protein_coding
TetK27	chr1	37889029	37891291	2262	37890278	191	227.061	32.8466	223.721	TetK27_peak_251	Mitd1	ENSMUST00000027257.9	-	37878888	37890412	TSS	0	-10141	0.120087	0.611578	CCDS35542.1	ENSMUSG00000026088.15	Mitd1	protein_coding	OTTMUSG00000026563.1	OTTMUST00000065724.1	2	---	ENSMUSP00000027257.8	Mitd1-201	1	protein_coding
TetK27	chr1	37995948	37999151	3203	37997046	223	335.419	60.6	331.293	TetK27_peak_252	Txndc9	ENSMUST00000162031.7	-	37985189	37997316	TSS	0	-10759	0.112879	0.427278	CCDS14898.1	ENSMUSG00000058407.12	Txndc9	protein_coding	OTTMUSG00000026595.1	OTTMUST00000065804.1	2	---	ENSMUSP00000125491.1	Txndc9-201	1	protein_coding
TetK27	chr1	38128807	38130579	1772	38129466	184	185.527	22.6661	182.417	TetK27_peak_253	Rev1	ENSMUST00000195383.1	-	38107683	38129802	TSS	0	-21124	0.045027	0.561760	---	ENSMUSG00000026082.11	Rev1	protein_coding	OTTMUSG00000049485.1	OTTMUST00000126176.1	2	---	ENSMUSP00000141647.1	Rev1-211	5	protein_coding
TetK27	chr1	38347484	38348146	662	38347966	13	5.99569	3.7875	4.17465	TetK27_peak_254	Aff3	ENSMUST00000027250.13	-	38335431	38664956	Intron 6	316810	-12053	0.002012	1.000000	---	ENSMUSG00000037138.17	Aff3	protein_coding	OTTMUSG00000019698.1	OTTMUST00000047163.1	1	---	---	Aff3-201	1	processed_transcript
TetK27	chr1	38395030	38395905	875	38395518	30	21.6938	8.3866	19.5925	TetK27_peak_255	Aff3	ENSMUST00000027250.13	-	38335431	38664956	Intron 6	269051	-59599	0.002658	1.000000	---	ENSMUSG00000037138.17	Aff3	protein_coding	OTTMUSG00000019698.1	OTTMUST00000047163.1	1	---	---	Aff3-201	1	processed_transcript
TetK27	chr1	38499963	38500274	311	38500167	12	5.2738	3.51696	3.47795	TetK27_peak_256	Aff3	ENSMUST00000027250.13	-	38335431	38664956	Intron 5	164682	-164532	0.000947	1.000000	---	ENSMUSG00000037138.17	Aff3	protein_coding	OTTMUSG00000019698.1	OTTMUST00000047163.1	1	---	---	Aff3-201	1	processed_transcript
TetK27	chr1	38557083	38558738	1655	38558090	45	28.2728	7.8695	26.1092	TetK27_peak_257	Aff3	ENSMUST00000134963.1	-	38535159	38664956	5' UTR Exon	106218	-21924	0.012758	1.000000	---	ENSMUSG00000037138.17	Aff3	protein_coding	OTTMUSG00000019698.1	OTTMUST00000076584.1	2	---	ENSMUSP00000116289.1	Aff3-204	3	nonsense_mediated_decay
TetK27	chr1	38562615	38563229	614	38562846	14	6.74667	4.05803	4.90229	TetK27_peak_258	Aff3	ENSMUST00000134963.1	-	38535159	38664956	5' UTR Exon	101727	-27456	0.004738	1.000000	---	ENSMUSG00000037138.17	Aff3	protein_coding	OTTMUSG00000019698.1	OTTMUST00000076584.1	2	---	ENSMUSP00000116289.1	Aff3-204	3	nonsense_mediated_decay
TetK27	chr1	38581845	38582204	359	38581914	12	5.2738	3.51696	3.47795	TetK27_peak_259	Aff3	ENSMUST00000134963.1	-	38535159	38664956	5' UTR Exon	82752	-46686	0.002774	1.000000	---	ENSMUSG00000037138.17	Aff3	protein_coding	OTTMUSG00000019698.1	OTTMUST00000076584.1	2	---	ENSMUSP00000116289.1	Aff3-204	3	nonsense_mediated_decay
TetK27	chr1	38597378	38598696	1318	38597863	37	24.4163	7.96878	22.2893	TetK27_peak_260	Aff3	ENSMUST00000134963.1	-	38535159	38664956	5' UTR Exon	66260	-62219	0.010162	1.000000	---	ENSMUSG00000037138.17	Aff3	protein_coding	OTTMUSG00000019698.1	OTTMUST00000076584.1	2	---	ENSMUSP00000116289.1	Aff3-204	3	nonsense_mediated_decay
TetK27	chr1	38600500	38603743	3243	38601652	72	57.6965	12.4886	55.2926	TetK27_peak_261	Aff3	ENSMUST00000134963.1	-	38535159	38664956	5' UTR Exon	61213	-65341	0.024993	1.000000	---	ENSMUSG00000037138.17	Aff3	protein_coding	OTTMUSG00000019698.1	OTTMUST00000076584.1	2	---	ENSMUSP00000116289.1	Aff3-204	3	nonsense_mediated_decay
TetK27	chr1	38626918	38628061	1143	38627722	61	40.5975	9.10338	38.3188	TetK27_peak_262	Aff3	ENSMUST00000212668.1	-	38535613	38627202	TSS	0	-91305	0.003112	0.249126	---	ENSMUSG00000037138.17	Aff3	protein_coding	OTTMUSG00000019698.1	OTTMUST00000150547.1	2	---	ENSMUSP00000148461.1	Aff3-206	5	protein_coding
TetK27	chr1	38636653	38636947	294	38636876	15	7.52498	4.32857	5.65872	TetK27_peak_263	Aff3	ENSMUST00000134963.1	-	38535159	38664956	5' UTR Exon	28009	-101494	0.002273	1.000000	---	ENSMUSG00000037138.17	Aff3	protein_coding	OTTMUSG00000019698.1	OTTMUST00000076584.1	2	---	ENSMUSP00000116289.1	Aff3-204	3	nonsense_mediated_decay
TetK27	chr1	38656350	38656641	291	38656544	15	7.52498	4.32857	5.65872	TetK27_peak_264	Aff3	ENSMUST00000134963.1	-	38535159	38664956	5' UTR Exon	8315	-121191	0.002250	1.000000	---	ENSMUSG00000037138.17	Aff3	protein_coding	OTTMUSG00000019698.1	OTTMUST00000076584.1	2	---	ENSMUSP00000116289.1	Aff3-204	3	nonsense_mediated_decay
TetK27	chr1	38657279	38659754	2475	38658033	43	36.6145	11.9036	34.3679	TetK27_peak_265	Aff3	ENSMUST00000134963.1	-	38535159	38664956	5' UTR Exon	5202	-122120	0.019076	1.000000	---	ENSMUSG00000037138.17	Aff3	protein_coding	OTTMUSG00000019698.1	OTTMUST00000076584.1	2	---	ENSMUSP00000116289.1	Aff3-204	3	nonsense_mediated_decay
TetK27	chr1	38660137	38660592	455	38660346	21	12.6908	5.95178	10.7156	TetK27_peak_266	Aff3	ENSMUST00000134963.1	-	38535159	38664956	5' UTR Exon	4364	-124978	0.003513	1.000000	---	ENSMUSG00000037138.17	Aff3	protein_coding	OTTMUSG00000019698.1	OTTMUST00000076584.1	2	---	ENSMUSP00000116289.1	Aff3-204	3	nonsense_mediated_decay
TetK27	chr1	38660922	38661350	428	38661115	18	10.0089	5.14017	8.08393	TetK27_peak_267	Aff3	ENSMUST00000134963.1	-	38535159	38664956	5' UTR Exon	3606	-125763	0.003305	1.000000	---	ENSMUSG00000037138.17	Aff3	protein_coding	OTTMUSG00000019698.1	OTTMUST00000076584.1	2	---	ENSMUSP00000116289.1	Aff3-204	3	nonsense_mediated_decay
TetK27	chr1	38662032	38666746	4714	38664819	90	102.088	24.6187	99.4154	TetK27_peak_268	Aff3	ENSMUST00000027250.13	-	38335431	38664956	TSS	0	-326601	0.008876	0.620361	---	ENSMUSG00000037138.17	Aff3	protein_coding	OTTMUSG00000019698.1	OTTMUST00000047163.1	1	---	---	Aff3-201	1	processed_transcript
TetK27	chr1	38722956	38724958	2002	38724149	33	24.9599	9.19821	22.8231	TetK27_peak_269	Gm38135	ENSMUST00000195068.1	+	38722620	38723122	TTS	336	0	0.332008	0.083375	---	ENSMUSG00000102541.1	Gm38135	processed_pseudogene	OTTMUSG00000050621.1	OTTMUST00000128339.1	1	PGO:0000004	---	Gm38135-201		processed_pseudogene
TetK27	chr1	38776829	38778480	1651	38777305	52	47.9484	14.3384	45.6112	TetK27_peak_270	.	.	.	.	.	Intergenic	.	.	.	.	.	.	.	.	.	.	.	.	.	.	.	.
TetK27	chr1	38883424	38884107	683	38883745	16	8.32904	4.5991	6.44257	TetK27_peak_271	Gm37707	ENSMUST00000195309.1	+	38884754	38888073	TSS	-647	-3966	0.000000	0.000000	---	ENSMUSG00000103647.1	Gm37707	antisense_RNA	OTTMUSG00000049488.1	OTTMUST00000126184.1	2	---	---	Gm37707-201	3	antisense_RNA
TetK27	chr1	38885447	38886534	1087	38886275	34	26.0742	9.46874	23.926	TetK27_peak_272	Chst10	ENSMUST00000193435.5	-	38873949	38898135	5' UTR Exon	11601	-11498	0.044983	1.000000	---	ENSMUSG00000026080.13	Chst10	protein_coding	OTTMUSG00000049487.1	OTTMUST00000126181.1	2	---	ENSMUSP00000141604.1	Chst10-204	3	protein_coding
TetK27	chr1	38886676	38887256	580	38886878	24	15.5448	6.76339	13.5242	TetK27_peak_273	Gm37707	ENSMUST00000195309.1	+	38884754	38888073	TTS	1922	-817	0.175000	1.000000	---	ENSMUSG00000103647.1	Gm37707	antisense_RNA	OTTMUSG00000049488.1	OTTMUST00000126184.1	2	---	---	Gm37707-201	3	antisense_RNA
TetK27	chr1	38897209	38898381	1172	38897924	59	48.9583	12.5823	46.6186	TetK27_peak_274	Chst10	ENSMUST00000193441.5	-	38863867	38898090	TSS	0	-33342	0.025771	0.751918	---	ENSMUSG00000026080.13	Chst10	protein_coding	OTTMUSG00000049487.1	OTTMUST00000126178.1	2	---	ENSMUSP00000142028.1	Chst10-205	1	protein_coding
TetK27	chr1	38986920	38988762	1842	38987924	148	160.557	25.4903	157.576	TetK27_peak_275	Pdcl3	ENSMUST00000194552.1	+	38987865	38995808	TSS	0	-7046	0.113041	0.487249	---	ENSMUSG00000026078.10	Pdcl3	protein_coding	OTTMUSG00000050275.1	OTTMUST00000127890.1	2	---	ENSMUSP00000142151.1	Pdcl3-204	5	protein_coding
TetK27	chr1	39193439	39194750	1311	39193939	46	31.4363	8.85626	29.2393	TetK27_peak_276	Npas2	ENSMUST00000173050.7	+	39193731	39287616	TSS	0	-92866	0.010864	0.777439	---	ENSMUSG00000026077.15	Npas2	protein_coding	OTTMUSG00000036938.1	OTTMUST00000094904.1	2	---	ENSMUSP00000134241.1	Npas2-203	2	protein_coding
TetK27	chr1	39197083	39197415	332	39197247	16	8.32904	4.5991	6.44257	TetK27_peak_277	Npas2	ENSMUST00000173050.7	+	39193731	39287616	5' UTR Exon	3352	-90201	0.003547	1.000000	---	ENSMUSG00000026077.15	Npas2	protein_coding	OTTMUSG00000036938.1	OTTMUST00000094904.1	2	---	ENSMUSP00000134241.1	Npas2-203	2	protein_coding
TetK27	chr1	39234350	39236689	2339	39235113	57	54.5367	15.6911	52.153	TetK27_peak_278	Npas2	ENSMUST00000173050.7	+	39193731	39287616	5' UTR Exon	40619	-50927	0.024924	1.000000	---	ENSMUSG00000026077.15	Npas2	protein_coding	OTTMUSG00000036938.1	OTTMUST00000094904.1	2	---	ENSMUSP00000134241.1	Npas2-203	2	protein_coding
TetK27	chr1	39241616	39242004	388	39241812	16	8.32904	4.5991	6.44257	TetK27_peak_279	Npas2	ENSMUST00000173050.7	+	39193731	39287616	5' UTR Exon	47885	-45612	0.004143	1.000000	---	ENSMUSG00000026077.15	Npas2	protein_coding	OTTMUSG00000036938.1	OTTMUST00000094904.1	2	---	ENSMUSP00000134241.1	Npas2-203	2	protein_coding
TetK27	chr1	39280746	39281934	1188	39281251	45	39.0701	12.4446	36.8029	TetK27_peak_280	Npas2	ENSMUST00000173050.7	+	39193731	39287616	Intron 2	87015	-5682	0.012664	1.000000	---	ENSMUSG00000026077.15	Npas2	protein_coding	OTTMUSG00000036938.1	OTTMUST00000094904.1	2	---	ENSMUSP00000134241.1	Npas2-203	2	protein_coding
TetK27	chr1	39367187	39369858	2671	39368128	166	173.73	24.1256	170.681	TetK27_peak_281	Rpl31	ENSMUST00000178079.7	+	39367929	39371365	TSS	0	-1507	0.561536	0.722305	CCDS14904.1	ENSMUSG00000073702.11	Rpl31	protein_coding	OTTMUSG00000050276.1	OTTMUST00000127693.1	2	---	ENSMUSP00000136354.1	Rpl31-202	2	protein_coding
TetK27	chr1	39370205	39370484	279	39370324	14	6.74667	4.05803	4.90229	TetK27_peak_282	Rpl31	ENSMUST00000194746.5	+	39367878	39371367	TTS	2327	-883	0.080229	1.000000	---	ENSMUSG00000073702.11	Rpl31	protein_coding	OTTMUSG00000050276.1	OTTMUST00000127692.1	2	---	ENSMUSP00000141808.1	Rpl31-205	1	protein_coding
TetK27	chr1	39478268	39478720	452	39478501	45	21.8392	5.75083	19.7378	TetK27_peak_283	Tbc1d8	ENSMUST00000193823.1	-	39373316	39478701	TSS	0	-104952	0.004118	0.958057	---	ENSMUSG00000003134.10	Tbc1d8	protein_coding	OTTMUSG00000050277.1	OTTMUST00000127698.1	2	---	ENSMUSP00000141750.1	Tbc1d8-204	1	protein_coding
TetK27	chr1	39502903	39503201	298	39503046	13	5.99569	3.7875	4.17465	TetK27_peak_284	.	.	.	.	.	Intergenic	.	.	.	.	.	.	.	.	.	.	.	.	.	.	.	.
TetK27	chr1	39535096	39536779	1683	39535946	274	332.977	36.861	328.875	TetK27_peak_285	Cnot11	ENSMUST00000003219.13	+	39535802	39546874	TSS	0	-10095	0.088323	0.580760	CCDS14906.1	ENSMUSG00000003135.15	Cnot11	protein_coding	OTTMUSG00000026590.1	---	3	---	ENSMUSP00000003219.8	Cnot11-201	1	protein_coding
TetK27	chr1	39537515	39537766	251	39537567	10	3.92564	2.97589	2.18676	TetK27_peak_286	Cnot11	ENSMUST00000160145.1	+	39538245	39546484	TSS	-479	-8718	0.000000	0.000000	---	ENSMUSG00000003135.15	Cnot11	protein_coding	OTTMUSG00000026590.1	OTTMUST00000065795.1	2	---	---	Cnot11-202	1	retained_intron
TetK27	chr1	39555454	39556876	1422	39556255	36	28.339	10.0098	26.168	TetK27_peak_287	Rnf149	ENSMUST00000153381.1	-	39555605	39558758	TTS	1882	0	0.403297	0.893886	---	ENSMUSG00000048234.13	Rnf149	protein_coding	OTTMUSG00000021879.1	OTTMUST00000051940.1	2	---	---	Rnf149-202	3	retained_intron
TetK27	chr1	39558598	39559295	697	39558808	17	7.96295	4.25508	6.09287	TetK27_peak_288	Rnf149	ENSMUST00000153381.1	-	39555605	39558758	TSS	0	-2993	0.051046	0.230659	---	ENSMUSG00000048234.13	Rnf149	protein_coding	OTTMUSG00000021879.1	OTTMUST00000051940.1	2	---	---	Rnf149-202	3	retained_intron
TetK27	chr1	39559453	39559852	399	39559652	20	11.7766	5.68125	9.81736	TetK27_peak_289	Rnf149	ENSMUST00000153381.1	-	39555605	39558758	TSS	-695	-3848	0.000000	0.000000	---	ENSMUSG00000048234.13	Rnf149	protein_coding	OTTMUSG00000021879.1	OTTMUST00000051940.1	2	---	---	Rnf149-202	3	retained_intron
TetK27	chr1	39559964	39561697	1733	39560500	30	21.6938	8.3866	19.5925	TetK27_peak_290	Rnf149	ENSMUST00000195136.1	-	39552469	39577357	CDS Exon 4	15660	-7495	0.069669	1.000000	---	ENSMUSG00000048234.13	Rnf149	protein_coding	OTTMUSG00000021879.1	OTTMUST00000127898.1	2	---	ENSMUSP00000141667.1	Rnf149-203	5	nonsense_mediated_decay
TetK27	chr1	39571599	39571850	251	39571684	10	3.92564	2.97589	2.18676	TetK27_peak_291	Rnf149	ENSMUST00000195136.1	-	39552469	39577357	5' UTR Exon	5507	-19130	0.010125	1.000000	---	ENSMUSG00000048234.13	Rnf149	protein_coding	OTTMUSG00000021879.1	OTTMUST00000127898.1	2	---	ENSMUSP00000141667.1	Rnf149-203	5	nonsense_mediated_decay
TetK27	chr1	39575683	39578864	3181	39577175	201	199.746	22.2575	196.559	TetK27_peak_292	Rnf149	ENSMUST00000195136.1	-	39552469	39577357	TSS	0	-23214	0.067299	0.526398	---	ENSMUSG00000048234.13	Rnf149	protein_coding	OTTMUSG00000021879.1	OTTMUST00000127898.1	2	---	ENSMUSP00000141667.1	Rnf149-203	5	nonsense_mediated_decay
TetK27	chr1	39650554	39651186	632	39650871	25	13.5124	5.59314	11.5325	TetK27_peak_293	D930019O06Rik	ENSMUST00000181841.1	+	39650176	39657391	CDS Exon 1	378	-6205	0.087722	1.000000	---	ENSMUSG00000097083.1	D930019O06Rik	antisense_RNA	OTTMUSG00000050390.1	OTTMUST00000127900.1	2	---	---	D930019O06Rik-201	1	antisense_RNA
TetK27	chr1	39670446	39670910	464	39670753	12	5.2738	3.51696	3.47795	TetK27_peak_294	Rfx8	ENSMUST00000151913.2	-	39665301	39720998	CDS Exon 14	50088	-5145	0.008349	1.000000	CCDS48245.1	ENSMUSG00000057173.8	Rfx8	protein_coding	OTTMUSG00000033905.1	OTTMUST00000085534.1	2	---	ENSMUSP00000121212.1	Rfx8-202	1	protein_coding
TetK27	chr1	39702548	39703373	825	39702985	15	7.52498	4.32857	5.65872	TetK27_peak_295	Rfx8	ENSMUST00000151913.2	-	39665301	39720998	Intron 4	17625	-37247	0.014830	1.000000	CCDS48245.1	ENSMUSG00000057173.8	Rfx8	protein_coding	OTTMUSG00000033905.1	OTTMUST00000085534.1	2	---	ENSMUSP00000121212.1	Rfx8-202	1	protein_coding
TetK27	chr1	39710409	39710868	459	39710620	16	8.32904	4.5991	6.44257	TetK27_peak_296	Rfx8	ENSMUST00000151913.2	-	39665301	39720998	Intron 3	10130	-45108	0.008259	1.000000	CCDS48245.1	ENSMUSG00000057173.8	Rfx8	protein_coding	OTTMUSG00000033905.1	OTTMUST00000085534.1	2	---	ENSMUSP00000121212.1	Rfx8-202	1	protein_coding
TetK27	chr1	39713409	39714787	1378	39713647	24	15.5448	6.76339	13.5242	TetK27_peak_297	Rfx8	ENSMUST00000151913.2	-	39665301	39720998	Intron 2	6211	-48108	0.024759	1.000000	CCDS48245.1	ENSMUSG00000057173.8	Rfx8	protein_coding	OTTMUSG00000033905.1	OTTMUST00000085534.1	2	---	ENSMUSP00000121212.1	Rfx8-202	1	protein_coding
TetK27	chr1	39733745	39735037	1292	39734490	32	23.8582	8.92767	21.733	TetK27_peak_298	.	.	.	.	.	Intergenic	.	.	.	.	.	.	.	.	.	.	.	.	.	.	.	.
TetK27	chr1	39736070	39736470	400	39736266	15	7.52498	4.32857	5.65872	TetK27_peak_299	.	.	.	.	.	Intergenic	.	.	.	.	.	.	.	.	.	.	.	.	.	.	.	.
TetK27	chr1	39749535	39749921	386	39749815	12	5.2738	3.51696	3.47795	TetK27_peak_300	.	.	.	.	.	Intergenic	.	.	.	.	.	.	.	.	.	.	.	.	.	.	.	.
TetK27	chr1	39761242	39762138	896	39761842	28	19.5842	7.84553	17.5081	TetK27_peak_301	.	.	.	.	.	Intergenic	.	.	.	.	.	.	.	.	.	.	.	.	.	.	.	.
TetK27	chr1	39841797	39843624	1827	39842533	56	51.9988	14.8524	49.6329	TetK27_peak_302	1700066B17Rik	ENSMUST00000186683.1	-	39842428	39847335	TTS	3711	0	0.243888	0.654814	---	ENSMUSG00000101634.6	1700066B17Rik	lincRNA	OTTMUSG00000045299.1	OTTMUST00000118962.1	2	---	---	1700066B17Rik-201	1	lincRNA
TetK27	chr1	39846718	39847683	965	39847444	20	11.7766	5.68125	9.81736	TetK27_peak_303	1700066B17Rik	ENSMUST00000186683.1	-	39842428	39847335	TSS	0	-4290	0.125917	0.639752	---	ENSMUSG00000101634.6	1700066B17Rik	lincRNA	OTTMUSG00000045299.1	OTTMUST00000118962.1	2	---	---	1700066B17Rik-201	1	lincRNA
TetK27	chr1	39895186	39897855	2669	39897043	56	53.2036	15.4205	50.829	TetK27_peak_304	.	.	.	.	.	Intergenic	.	.	.	.	.	.	.	.	.	.	.	.	.	.	.	.
TetK27	chr1	39900043	39903202	3159	39901144	233	285.61	36.6557	281.891	TetK27_peak_305	Map4k4	ENSMUST00000195860.5	+	39901179	40024755	TSS	0	-121553	0.016378	0.640506	CCDS78573.1	ENSMUSG00000026074.14	Map4k4	protein_coding	OTTMUSG00000050440.1	OTTMUST00000127976.1	2	---	ENSMUSP00000141400.1	Map4k4-218	1	protein_coding
TetK27	chr1	39904500	39905342	842	39904837	26	17.5331	7.30446	15.4838	TetK27_peak_306	Map4k4	ENSMUST00000195860.5	+	39901179	40024755	Intron 2	3321	-119413	0.006822	1.000000	CCDS78573.1	ENSMUSG00000026074.14	Map4k4	protein_coding	OTTMUSG00000050440.1	OTTMUST00000127976.1	2	---	ENSMUSP00000141400.1	Map4k4-218	1	protein_coding
TetK27	chr1	39906752	39907706	954	39907400	18	10.0089	5.14017	8.08393	TetK27_peak_307	Map4k4	ENSMUST00000195860.5	+	39901179	40024755	Intron 2	5573	-117049	0.007728	1.000000	CCDS78573.1	ENSMUSG00000026074.14	Map4k4	protein_coding	OTTMUSG00000050440.1	OTTMUST00000127976.1	2	---	ENSMUSP00000141400.1	Map4k4-218	1	protein_coding
TetK27	chr1	39909000	39909363	363	39909239	16	8.32904	4.5991	6.44257	TetK27_peak_308	Map4k4	ENSMUST00000195860.5	+	39901179	40024755	Intron 2	7821	-115392	0.002946	1.000000	CCDS78573.1	ENSMUSG00000026074.14	Map4k4	protein_coding	OTTMUSG00000050440.1	OTTMUST00000127976.1	2	---	ENSMUSP00000141400.1	Map4k4-218	1	protein_coding
TetK27	chr1	39913258	39913580	322	39913387	18	10.0089	5.14017	8.08393	TetK27_peak_309	Map4k4	ENSMUST00000195860.5	+	39901179	40024755	Intron 2	12079	-111175	0.002614	1.000000	CCDS78573.1	ENSMUSG00000026074.14	Map4k4	protein_coding	OTTMUSG00000050440.1	OTTMUST00000127976.1	2	---	ENSMUSP00000141400.1	Map4k4-218	1	protein_coding
TetK27	chr1	39917374	39919278	1904	39918423	30	21.6938	8.3866	19.5925	TetK27_peak_310	Map4k4	ENSMUST00000195860.5	+	39901179	40024755	Intron 2	16195	-105477	0.015415	1.000000	CCDS78573.1	ENSMUSG00000026074.14	Map4k4	protein_coding	OTTMUSG00000050440.1	OTTMUST00000127976.1	2	---	ENSMUSP00000141400.1	Map4k4-218	1	protein_coding
TetK27	chr1	39920489	39921190	701	39920685	20	11.7766	5.68125	9.81736	TetK27_peak_311	Map4k4	ENSMUST00000195860.5	+	39901179	40024755	Intron 2	19310	-103565	0.005681	1.000000	CCDS78573.1	ENSMUSG00000026074.14	Map4k4	protein_coding	OTTMUSG00000050440.1	OTTMUST00000127976.1	2	---	ENSMUSP00000141400.1	Map4k4-218	1	protein_coding
TetK27	chr1	39921244	39922401	1157	39922143	31	22.7693	8.65714	20.656	TetK27_peak_312	Map4k4	ENSMUST00000195860.5	+	39901179	40024755	Intron 2	20065	-102354	0.009371	1.000000	CCDS78573.1	ENSMUSG00000026074.14	Map4k4	protein_coding	OTTMUSG00000050440.1	OTTMUST00000127976.1	2	---	ENSMUSP00000141400.1	Map4k4-218	1	protein_coding
TetK27	chr1	39922556	39924435	1879	39923402	66	66.8531	18.1259	64.3879	TetK27_peak_313	Map4k4	ENSMUST00000195860.5	+	39901179	40024755	Intron 2	21377	-100320	0.015213	1.000000	CCDS78573.1	ENSMUSG00000026074.14	Map4k4	protein_coding	OTTMUSG00000050440.1	OTTMUST00000127976.1	2	---	ENSMUSP00000141400.1	Map4k4-218	1	protein_coding
TetK27	chr1	39924516	39926847	2331	39926006	68	69.6635	18.6669	67.1803	TetK27_peak_314	Map4k4	ENSMUST00000195860.5	+	39901179	40024755	Intron 2	23337	-97908	0.018871	1.000000	CCDS78573.1	ENSMUSG00000026074.14	Map4k4	protein_coding	OTTMUSG00000050440.1	OTTMUST00000127976.1	2	---	ENSMUSP00000141400.1	Map4k4-218	1	protein_coding
TetK27	chr1	39926979	39927230	251	39926996	11	4.58302	3.24643	2.81413	TetK27_peak_315	Map4k4	ENSMUST00000195860.5	+	39901179	40024755	Intron 2	25800	-97525	0.002039	1.000000	CCDS78573.1	ENSMUSG00000026074.14	Map4k4	protein_coding	OTTMUSG00000050440.1	OTTMUST00000127976.1	2	---	ENSMUSP00000141400.1	Map4k4-218	1	protein_coding
TetK27	chr1	39927539	39927892	353	39927667	16	8.32904	4.5991	6.44257	TetK27_peak_316	Map4k4	ENSMUST00000195860.5	+	39901179	40024755	Intron 2	26360	-96863	0.002865	1.000000	CCDS78573.1	ENSMUSG00000026074.14	Map4k4	protein_coding	OTTMUSG00000050440.1	OTTMUST00000127976.1	2	---	ENSMUSP00000141400.1	Map4k4-218	1	protein_coding
TetK27	chr1	39929027	39929566	539	39929217	17	5.44931	3.07937	3.65245	TetK27_peak_317	Map4k4	ENSMUST00000195860.5	+	39901179	40024755	Intron 2	27848	-95189	0.004370	1.000000	CCDS78573.1	ENSMUSG00000026074.14	Map4k4	protein_coding	OTTMUSG00000050440.1	OTTMUST00000127976.1	2	---	ENSMUSP00000141400.1	Map4k4-218	1	protein_coding
TetK27	chr1	39931690	39933993	2303	39932822	37	29.4889	10.2804	27.3063	TetK27_peak_318	Map4k4	ENSMUST00000195860.5	+	39901179	40024755	Intron 2	30511	-90762	0.018644	1.000000	CCDS78573.1	ENSMUSG00000026074.14	Map4k4	protein_coding	OTTMUSG00000050440.1	OTTMUST00000127976.1	2	---	ENSMUSP00000141400.1	Map4k4-218	1	protein_coding
TetK27	chr1	39934970	39935250	280	39935178	12	5.2738	3.51696	3.47795	TetK27_peak_319	Map4k4	ENSMUST00000195860.5	+	39901179	40024755	Intron 2	33791	-89505	0.002274	1.000000	CCDS78573.1	ENSMUSG00000026074.14	Map4k4	protein_coding	OTTMUSG00000050440.1	OTTMUST00000127976.1	2	---	ENSMUSP00000141400.1	Map4k4-218	1	protein_coding
TetK27	chr1	39935464	39937697	2233	39936470	79	85.5487	21.6428	82.969	TetK27_peak_320	Map4k4	ENSMUST00000195860.5	+	39901179	40024755	Intron 2	34285	-87058	0.018078	1.000000	CCDS78573.1	ENSMUSG00000026074.14	Map4k4	protein_coding	OTTMUSG00000050440.1	OTTMUST00000127976.1	2	---	ENSMUSP00000141400.1	Map4k4-218	1	protein_coding
TetK27	chr1	39941020	39942146	1126	39941750	21	12.6712	5.94172	10.7067	TetK27_peak_321	Map4k4	ENSMUST00000195860.5	+	39901179	40024755	Intron 2	39841	-82609	0.009120	1.000000	CCDS78573.1	ENSMUSG00000026074.14	Map4k4	protein_coding	OTTMUSG00000050440.1	OTTMUST00000127976.1	2	---	ENSMUSP00000141400.1	Map4k4-218	1	protein_coding
TetK27	chr1	39944202	39944887	685	39944559	21	12.6908	5.95178	10.7156	TetK27_peak_322	Map4k4	ENSMUST00000195860.5	+	39901179	40024755	Intron 2	43023	-79868	0.005551	1.000000	CCDS78573.1	ENSMUSG00000026074.14	Map4k4	protein_coding	OTTMUSG00000050440.1	OTTMUST00000127976.1	2	---	ENSMUSP00000141400.1	Map4k4-218	1	protein_coding
TetK27	chr1	39949134	39950182	1048	39950032	18	8.73676	4.49148	6.84645	TetK27_peak_323	Map4k4	ENSMUST00000195860.5	+	39901179	40024755	Intron 2	47955	-74573	0.008489	1.000000	CCDS78573.1	ENSMUSG00000026074.14	Map4k4	protein_coding	OTTMUSG00000050440.1	OTTMUST00000127976.1	2	---	ENSMUSP00000141400.1	Map4k4-218	1	protein_coding
TetK27	chr1	39959959	39960433	474	39960356	14	6.74667	4.05803	4.90229	TetK27_peak_324	Map4k4	ENSMUST00000195860.5	+	39901179	40024755	Intron 2	58780	-64322	0.003844	1.000000	CCDS78573.1	ENSMUSG00000026074.14	Map4k4	protein_coding	OTTMUSG00000050440.1	OTTMUST00000127976.1	2	---	ENSMUSP00000141400.1	Map4k4-218	1	protein_coding
TetK27	chr1	39986684	39986982	298	39986785	15	7.52498	4.32857	5.65872	TetK27_peak_325	Map4k4	ENSMUST00000195860.5	+	39901179	40024755	CDS Exon 10	85505	-37773	0.002420	1.000000	CCDS78573.1	ENSMUSG00000026074.14	Map4k4	protein_coding	OTTMUSG00000050440.1	OTTMUST00000127976.1	2	---	ENSMUSP00000141400.1	Map4k4-218	1	protein_coding
TetK27	chr1	40022295	40023384	1089	40022481	20	11.7766	5.68125	9.81736	TetK27_peak_326	Map4k4	ENSMUST00000191657.1	+	40023210	40024426	TSS	0	-1042	0.143796	0.160550	---	ENSMUSG00000026074.14	Map4k4	protein_coding	OTTMUSG00000050440.1	OTTMUST00000127991.1	2	---	---	Map4k4-203	3	retained_intron
TetK27	chr1	40033197	40034137	940	40033813	25	16.5309	7.03392	14.4964	TetK27_peak_327	.	.	.	.	.	Intergenic	.	.	.	.	.	.	.	.	.	.	.	.	.	.	.	.
TetK27	chr1	40052000	40052331	331	40052081	12	5.2738	3.51696	3.47795	TetK27_peak_328	.	.	.	.	.	Intergenic	.	.	.	.	.	.	.	.	.	.	.	.	.	.	.	.
TetK27	chr1	40052458	40052840	382	40052672	20	11.7766	5.68125	9.81736	TetK27_peak_329	.	.	.	.	.	Intergenic	.	.	.	.	.	.	.	.	.	.	.	.	.	.	.	.
TetK27	chr1	40053367	40053978	611	40053686	27	18.5511	7.57499	16.4886	TetK27_peak_330	.	.	.	.	.	Intergenic	.	.	.	.	.	.	.	.	.	.	.	.	.	.	.	.
TetK27	chr1	40054179	40054617	438	40054403	15	7.52498	4.32857	5.65872	TetK27_peak_331	.	.	.	.	.	Intergenic	.	.	.	.	.	.	.	.	.	.	.	.	.	.	.	.
TetK27	chr1	40054913	40055730	817	40055530	25	13.1967	5.45233	11.2175	TetK27_peak_332	.	.	.	.	.	Intergenic	.	.	.	.	.	.	.	.	.	.	.	.	.	.	.	.
TetK27	chr1	40055991	40056671	680	40056286	23	14.5757	6.49285	12.5699	TetK27_peak_333	.	.	.	.	.	Intergenic	.	.	.	.	.	.	.	.	.	.	.	.	.	.	.	.
TetK27	chr1	40058409	40059805	1396	40059001	32	23.8582	8.92767	21.733	TetK27_peak_334	.	.	.	.	.	Intergenic	.	.	.	.	.	.	.	.	.	.	.	.	.	.	.	.
TetK27	chr1	40085004	40087917	2913	40085680	66	66.8531	18.1259	64.3879	TetK27_peak_335	Il1r2	ENSMUST00000194913.1	+	40085985	40102437	TSS	0	-14520	0.117486	0.663349	---	ENSMUSG00000026073.13	Il1r2	protein_coding	OTTMUSG00000050443.1	OTTMUST00000127997.1	2	---	ENSMUSP00000141785.1	Il1r2-203	3	protein_coding
TetK27	chr1	40266430	40266914	484	40266540	18	8.7091	4.4778	6.82036	TetK27_peak_336	Il1r1	ENSMUST00000195402.1	+	40266657	40277179	TSS	0	-10265	0.024518	0.531959	---	ENSMUSG00000026072.12	Il1r1	protein_coding	OTTMUSG00000050518.1	OTTMUST00000128258.1	2	---	---	Il1r1-203	3	processed_transcript
TetK27	chr1	40324236	40325526	1290	40325012	28	19.5842	7.84553	17.5081	TetK27_peak_337	Il1rl2	ENSMUST00000095020.8	+	40324627	40365472	TSS	0	-39946	0.022034	0.697134	CCDS14910.1	ENSMUSG00000070942.8	Il1rl2	protein_coding	OTTMUSG00000050520.1	OTTMUST00000128136.1	2	---	ENSMUSP00000092630.3	Il1rl2-201	1	protein_coding
TetK27	chr1	40326739	40327044	305	40326869	12	5.2738	3.51696	3.47795	TetK27_peak_338	Il1rl2	ENSMUST00000192551.1	+	40324610	40329442	CDS Exon 1	2129	-2398	0.063315	1.000000	---	ENSMUSG00000070942.8	Il1rl2	protein_coding	OTTMUSG00000050520.1	OTTMUST00000128135.1	2	---	---	Il1rl2-202	1	retained_intron
TetK27	chr1	40444780	40445166	386	40444994	11	4.58302	3.24643	2.81413	TetK27_peak_339	Il1rl1	ENSMUST00000173514.7	+	40439776	40448149	Intron 6	5004	-2983	0.046214	1.000000	CCDS56626.1	ENSMUSG00000026069.15	Il1rl1	protein_coding	OTTMUSG00000037806.1	OTTMUST00000097566.1	2	---	ENSMUSP00000133784.1	Il1rl1-203	1	protein_coding
TetK27	chr1	40465628	40465971	343	40465815	24	15.0487	6.51421	13.0397	TetK27_peak_340	Il18r1	ENSMUST00000167723.7	+	40465552	40491579	TSS	76	-25608	0.013217	1.000000	CCDS48247.1	ENSMUSG00000026070.15	Il18r1	protein_coding	OTTMUSG00000050472.1	OTTMUST00000128055.1	2	---	ENSMUSP00000128277.1	Il18r1-203	1	protein_coding
TetK27	chr1	40470262	40470608	346	40470320	12	5.2738	3.51696	3.47795	TetK27_peak_341	Il18r1	ENSMUST00000167723.7	+	40465552	40491579	5' UTR Exon	4710	-20971	0.013332	1.000000	CCDS48247.1	ENSMUSG00000026070.15	Il18r1	protein_coding	OTTMUSG00000050472.1	OTTMUST00000128055.1	2	---	ENSMUSP00000128277.1	Il18r1-203	1	protein_coding
TetK27	chr1	40514904	40515200	296	40515058	19	10.8823	5.41071	8.93972	TetK27_peak_342	Il18rap	ENSMUST00000159724.1	+	40515448	40526918	TSS	-248	-11718	0.000000	0.000000	---	ENSMUSG00000026068.11	Il18rap	protein_coding	OTTMUSG00000034788.1	OTTMUST00000088426.1	2	---	---	Il18rap-202	2	retained_intron
TetK27	chr1	40790301	40791089	788	40790613	58	44.564	11.1174	42.2547	TetK27_peak_343	Mfsd9	ENSMUST00000039672.5	-	40772038	40790664	TSS	0	-18263	0.019542	0.461343	CCDS14915.1	ENSMUSG00000041945.12	Mfsd9	protein_coding	OTTMUSG00000022617.1	OTTMUST00000054180.1	2	---	ENSMUSP00000035727.5	Mfsd9-201	1	protein_coding
TetK27	chr1	42206882	42207207	325	42207051	19	6.67168	3.42152	4.8446	TetK27_peak_344	.	.	.	.	.	Intergenic	.	.	.	.	.	.	.	.	.	.	.	.	.	.	.	.
TetK27	chr1	42850937	42851974	1037	42851444	109	88.2593	13.752	85.667	TetK27_peak_345	Mrps9	ENSMUST00000185523.6	+	42851276	42902014	TSS	0	-50040	0.013776	0.673410	---	ENSMUSG00000060679.14	Mrps9	protein_coding	OTTMUSG00000046302.1	OTTMUST00000120698.1	2	---	---	Mrps9-203	1	processed_transcript
TetK27	chr1	42952553	42953893	1340	42953419	67	51.865	11.6332	49.5046	TetK27_peak_346	Gpr45	ENSMUST00000188621.1	+	42952872	42955156	TSS	0	-1263	0.447265	0.762118	---	ENSMUSG00000041907.9	Gpr45	protein_coding	OTTMUSG00000045911.1	OTTMUST00000126193.1	2	---	---	Gpr45-205	1	processed_transcript
TetK27	chr1	42999658	43000083	425	42999857	20	11.7766	5.68125	9.81736	TetK27_peak_347	Gpr45	ENSMUST00000179766.2	+	42952963	43035457	5' UTR Exon	46695	-35374	0.005164	1.000000	CCDS14919.1	ENSMUSG00000041907.9	Gpr45	protein_coding	OTTMUSG00000045911.1	OTTMUST00000119941.1	2	---	ENSMUSP00000135986.1	Gpr45-203	1	protein_coding
TetK27	chr1	43000199	43001040	841	43000365	27	18.5511	7.57499	16.4886	TetK27_peak_348	Gpr45	ENSMUST00000179766.2	+	42952963	43035457	5' UTR Exon	47236	-34417	0.010207	1.000000	CCDS14919.1	ENSMUSG00000041907.9	Gpr45	protein_coding	OTTMUSG00000045911.1	OTTMUST00000119941.1	2	---	ENSMUSP00000135986.1	Gpr45-203	1	protein_coding
TetK27	chr1	43001397	43001682	285	43001506	14	6.74667	4.05803	4.90229	TetK27_peak_349	Gpr45	ENSMUST00000179766.2	+	42952963	43035457	5' UTR Exon	48434	-33775	0.003467	1.000000	CCDS14919.1	ENSMUSG00000041907.9	Gpr45	protein_coding	OTTMUSG00000045911.1	OTTMUST00000119941.1	2	---	ENSMUSP00000135986.1	Gpr45-203	1	protein_coding
TetK27	chr1	43091589	43093341	1752	43092313	175	180.479	23.591	177.395	TetK27_peak_350	8430432A02Rik	ENSMUST00000039080.3	+	43092588	43093836	TSS	0	-495	0.603683	0.430120	---	ENSMUSG00000041878.3	8430432A02Rik	antisense_RNA	OTTMUSG00000046306.1	OTTMUST00000120712.1	2	---	---	8430432A02Rik-201		antisense_RNA
TetK27	chr1	43097698	43099798	2100	43098579	307	425.372	52.6914	420.324	TetK27_peak_351	Tgfbrap1	ENSMUST00000189010.1	-	43075616	43098365	TSS	0	-22082	0.029363	0.317944	---	ENSMUSG00000070939.9	Tgfbrap1	protein_coding	OTTMUSG00000046304.1	OTTMUST00000120709.1	2	---	ENSMUSP00000140413.1	Tgfbrap1-207	3	protein_coding
TetK27	chr1	43144085	43144967	882	43144686	19	10.8823	5.41071	8.93972	TetK27_peak_352	Fhl2	ENSMUST00000187357.1	-	43131764	43196762	5' UTR Exon	51795	-12321	0.013585	1.000000	---	ENSMUSG00000008136.14	Fhl2	protein_coding	OTTMUSG00000046311.1	OTTMUST00000120720.1	2	---	ENSMUSP00000140420.1	Fhl2-203	2	protein_coding
TetK27	chr1	43145361	43145796	435	43145598	16	8.32904	4.5991	6.44257	TetK27_peak_353	Fhl2	ENSMUST00000187357.1	-	43131764	43196762	5' UTR Exon	50966	-13597	0.006708	1.000000	---	ENSMUSG00000008136.14	Fhl2	protein_coding	OTTMUSG00000046311.1	OTTMUST00000120720.1	2	---	ENSMUSP00000140420.1	Fhl2-203	2	protein_coding
TetK27	chr1	43163142	43164311	1169	43163776	81	88.5097	22.1839	85.9127	TetK27_peak_354	Fhl2	ENSMUST00000008280.13	-	43123074	43163962	TSS	0	-40068	0.020079	0.701709	CCDS14922.1	ENSMUSG00000008136.14	Fhl2	protein_coding	OTTMUSG00000046311.1	OTTMUST00000120717.1	2	---	ENSMUSP00000008280.7	Fhl2-201	1	protein_coding
TetK27	chr1	43168754	43169318	564	43169250	13	5.11059	3.30951	3.33512	TetK27_peak_355	Fhl2	ENSMUST00000187357.1	-	43131764	43196762	5' UTR Exon	27444	-36990	0.008692	1.000000	---	ENSMUSG00000008136.14	Fhl2	protein_coding	OTTMUSG00000046311.1	OTTMUST00000120720.1	2	---	ENSMUSP00000140420.1	Fhl2-203	2	protein_coding
TetK27	chr1	43189054	43189312	258	43189106	28	14.3591	5.4645	12.3638	TetK27_peak_356	Gm8210	ENSMUST00000178557.1	+	43189156	43189639	TSS	0	-327	0.324380	0.606178	---	ENSMUSG00000094497.1	Gm8210	processed_pseudogene	OTTMUSG00000022085.1	OTTMUST00000052438.1	2	PGO:0000004	---	Gm8210-201		processed_pseudogene
TetK27	chr1	43224089	43224340	251	43224200	15	7.52498	4.32857	5.65872	TetK27_peak_357	.	.	.	.	.	Intergenic	.	.	.	.	.	.	.	.	.	.	.	.	.	.	.	.
TetK27	chr1	43240429	43241293	864	43240986	17	9.15743	4.86964	7.25158	TetK27_peak_358	.	.	.	.	.	Intergenic	.	.	.	.	.	.	.	.	.	.	.	.	.	.	.	.
TetK27	chr1	43241353	43242090	737	43241789	29	15.2043	5.65293	13.1944	TetK27_peak_359	.	.	.	.	.	Intergenic	.	.	.	.	.	.	.	.	.	.	.	.	.	.	.	.
TetK27	chr1	43445357	43447160	1803	43445952	150	135.728	17.6873	132.878	TetK27_peak_360	Nck2	ENSMUST00000086421.8	+	43445751	43570516	TSS	0	-123356	0.011301	0.781596	CCDS14924.1	ENSMUSG00000066877.11	Nck2	protein_coding	OTTMUSG00000021065.1	OTTMUST00000049828.1	2	---	ENSMUSP00000083611.5	Nck2-201	1	protein_coding
TetK27	chr1	43456695	43457579	884	43456967	17	9.15743	4.86964	7.25158	TetK27_peak_361	Nck2	ENSMUST00000124817.1	+	43457273	43462223	TSS	0	-4644	0.062008	0.346893	---	ENSMUSG00000066877.11	Nck2	protein_coding	OTTMUSG00000021065.1	OTTMUST00000049831.1	2	---	---	Nck2-203	1	processed_transcript
TetK27	chr1	43464003	43467016	3013	43464663	42	35.4012	11.633	33.1647	TetK27_peak_362	Nck2	ENSMUST00000086421.8	+	43445751	43570516	5' UTR Exon	18252	-103500	0.024157	1.000000	CCDS14924.1	ENSMUSG00000066877.11	Nck2	protein_coding	OTTMUSG00000021065.1	OTTMUST00000049828.1	2	---	ENSMUSP00000083611.5	Nck2-201	1	protein_coding
TetK27	chr1	43467351	43469664	2313	43468503	39	31.822	10.8214	29.6171	TetK27_peak_363	Nck2	ENSMUST00000086421.8	+	43445751	43570516	5' UTR Exon	21600	-100852	0.018547	1.000000	CCDS14924.1	ENSMUSG00000066877.11	Nck2	protein_coding	OTTMUSG00000021065.1	OTTMUST00000049828.1	2	---	ENSMUSP00000083611.5	Nck2-201	1	protein_coding
TetK27	chr1	43469753	43470079	326	43469941	15	7.52498	4.32857	5.65872	TetK27_peak_364	Nck2	ENSMUST00000086421.8	+	43445751	43570516	5' UTR Exon	24002	-100437	0.002621	1.000000	CCDS14924.1	ENSMUSG00000066877.11	Nck2	protein_coding	OTTMUSG00000021065.1	OTTMUST00000049828.1	2	---	ENSMUSP00000083611.5	Nck2-201	1	protein_coding
TetK27	chr1	43470729	43472910	2181	43472394	25	16.5309	7.03392	14.4964	TetK27_peak_365	Nck2	ENSMUST00000086421.8	+	43445751	43570516	5' UTR Exon	24978	-97606	0.017489	1.000000	CCDS14924.1	ENSMUSG00000066877.11	Nck2	protein_coding	OTTMUSG00000021065.1	OTTMUST00000049828.1	2	---	ENSMUSP00000083611.5	Nck2-201	1	protein_coding
TetK27	chr1	43473698	43475966	2268	43474505	82	78.3898	17.4055	75.8524	TetK27_peak_366	Nck2	ENSMUST00000086421.8	+	43445751	43570516	5' UTR Exon	27947	-94550	0.018186	1.000000	CCDS14924.1	ENSMUSG00000066877.11	Nck2	protein_coding	OTTMUSG00000021065.1	OTTMUST00000049828.1	2	---	ENSMUSP00000083611.5	Nck2-201	1	protein_coding
TetK27	chr1	43477178	43478747	1569	43478046	41	32.5342	10.5716	30.3267	TetK27_peak_367	Nck2	ENSMUST00000086421.8	+	43445751	43570516	5' UTR Exon	31427	-91769	0.012584	1.000000	CCDS14924.1	ENSMUSG00000066877.11	Nck2	protein_coding	OTTMUSG00000021065.1	OTTMUST00000049828.1	2	---	ENSMUSP00000083611.5	Nck2-201	1	protein_coding
TetK27	chr1	43483106	43483533	427	43483207	12	5.2738	3.51696	3.47795	TetK27_peak_368	Nck2	ENSMUST00000086421.8	+	43445751	43570516	5' UTR Exon	37355	-86983	0.003430	1.000000	CCDS14924.1	ENSMUSG00000066877.11	Nck2	protein_coding	OTTMUSG00000021065.1	OTTMUST00000049828.1	2	---	ENSMUSP00000083611.5	Nck2-201	1	protein_coding
TetK27	chr1	43499702	43502401	2699	43500732	47	39.6453	12.0819	37.3752	TetK27_peak_369	Nck2	ENSMUST00000086421.8	+	43445751	43570516	5' UTR Exon	53951	-68115	0.021641	1.000000	CCDS14924.1	ENSMUSG00000066877.11	Nck2	protein_coding	OTTMUSG00000021065.1	OTTMUST00000049828.1	2	---	ENSMUSP00000083611.5	Nck2-201	1	protein_coding
TetK27	chr1	43502481	43502986	505	43502696	21	12.2609	5.73251	10.2986	TetK27_peak_370	Nck2	ENSMUST00000086421.8	+	43445751	43570516	5' UTR Exon	56730	-67530	0.004056	1.000000	CCDS14924.1	ENSMUSG00000066877.11	Nck2	protein_coding	OTTMUSG00000021065.1	OTTMUST00000049828.1	2	---	ENSMUSP00000083611.5	Nck2-201	1	protein_coding
TetK27	chr1	43503210	43504514	1304	43504296	30	21.6938	8.3866	19.5925	TetK27_peak_371	Nck2	ENSMUST00000086421.8	+	43445751	43570516	5' UTR Exon	57459	-66002	0.010460	1.000000	CCDS14924.1	ENSMUSG00000066877.11	Nck2	protein_coding	OTTMUSG00000021065.1	OTTMUST00000049828.1	2	---	ENSMUSP00000083611.5	Nck2-201	1	protein_coding
TetK27	chr1	43504672	43504982	310	43504865	17	9.15743	4.86964	7.25158	TetK27_peak_372	Nck2	ENSMUST00000086421.8	+	43445751	43570516	5' UTR Exon	58921	-65534	0.002493	1.000000	CCDS14924.1	ENSMUSG00000066877.11	Nck2	protein_coding	OTTMUSG00000021065.1	OTTMUST00000049828.1	2	---	ENSMUSP00000083611.5	Nck2-201	1	protein_coding
TetK27	chr1	43505048	43505454	406	43505296	16	8.32904	4.5991	6.44257	TetK27_peak_373	Nck2	ENSMUST00000086421.8	+	43445751	43570516	5' UTR Exon	59297	-65062	0.003262	1.000000	CCDS14924.1	ENSMUSG00000066877.11	Nck2	protein_coding	OTTMUSG00000021065.1	OTTMUST00000049828.1	2	---	ENSMUSP00000083611.5	Nck2-201	1	protein_coding
TetK27	chr1	43519580	43520766	1186	43520392	27	16.5774	6.61902	14.5417	TetK27_peak_374	Nck2	ENSMUST00000086421.8	+	43445751	43570516	5' UTR Exon	73829	-49750	0.009514	1.000000	CCDS14924.1	ENSMUSG00000066877.11	Nck2	protein_coding	OTTMUSG00000021065.1	OTTMUST00000049828.1	2	---	ENSMUSP00000083611.5	Nck2-201	1	protein_coding
TetK27	chr1	43520837	43521527	690	43521301	19	10.8823	5.41071	8.93972	TetK27_peak_375	Nck2	ENSMUST00000086421.8	+	43445751	43570516	5' UTR Exon	75086	-48989	0.005538	1.000000	CCDS14924.1	ENSMUSG00000066877.11	Nck2	protein_coding	OTTMUSG00000021065.1	OTTMUST00000049828.1	2	---	ENSMUSP00000083611.5	Nck2-201	1	protein_coding
TetK27	chr1	43534487	43536173	1686	43535284	23	14.5757	6.49285	12.5699	TetK27_peak_376	Nck2	ENSMUST00000086421.8	+	43445751	43570516	Intron 3	88736	-34343	0.013521	1.000000	CCDS14924.1	ENSMUSG00000066877.11	Nck2	protein_coding	OTTMUSG00000021065.1	OTTMUST00000049828.1	2	---	ENSMUSP00000083611.5	Nck2-201	1	protein_coding
TetK27	chr1	43536245	43544893	8648	43542713	92	105.159	25.1598	102.47	TetK27_peak_377	Nck2	ENSMUST00000086421.8	+	43445751	43570516	Intron 3	90494	-25623	0.069322	1.000000	CCDS14924.1	ENSMUSG00000066877.11	Nck2	protein_coding	OTTMUSG00000021065.1	OTTMUST00000049828.1	2	---	ENSMUSP00000083611.5	Nck2-201	1	protein_coding
TetK27	chr1	43545047	43545474	427	43545243	24	15.5448	6.76339	13.5242	TetK27_peak_378	Nck2	ENSMUST00000086421.8	+	43445751	43570516	Intron 3	99296	-25042	0.003430	1.000000	CCDS14924.1	ENSMUSG00000066877.11	Nck2	protein_coding	OTTMUSG00000021065.1	OTTMUST00000049828.1	2	---	ENSMUSP00000083611.5	Nck2-201	1	protein_coding
TetK27	chr1	43550989	43551240	251	43551156	16	7.44726	4.13824	5.5971	TetK27_peak_379	Nck2	ENSMUST00000086421.8	+	43445751	43570516	Intron 3	105238	-19276	0.002020	1.000000	CCDS14924.1	ENSMUSG00000066877.11	Nck2	protein_coding	OTTMUSG00000021065.1	OTTMUST00000049828.1	2	---	ENSMUSP00000083611.5	Nck2-201	1	protein_coding
TetK27	chr1	43558165	43558529	364	43558412	13	5.99569	3.7875	4.17465	TetK27_peak_380	Nck2	ENSMUST00000086421.8	+	43445751	43570516	Intron 4	112414	-11987	0.002925	1.000000	CCDS14924.1	ENSMUSG00000066877.11	Nck2	protein_coding	OTTMUSG00000021065.1	OTTMUST00000049828.1	2	---	ENSMUSP00000083611.5	Nck2-201	1	protein_coding
TetK27	chr1	43559181	43559436	255	43559262	11	3.85142	2.83672	2.13865	TetK27_peak_381	Gm38228	ENSMUST00000193169.1	+	43560273	43561566	TSS	-837	-2130	0.000000	0.000000	---	ENSMUSG00000103945.1	Gm38228	TEC	OTTMUSG00000046354.1	OTTMUST00000120798.1	2	---	---	Gm38228-201		TEC
TetK27	chr1	43559613	43560451	838	43559808	21	12.6908	5.95178	10.7156	TetK27_peak_382	Gm38228	ENSMUST00000193169.1	+	43560273	43561566	TSS	0	-1115	0.138331	0.213349	---	ENSMUSG00000103945.1	Gm38228	TEC	OTTMUSG00000046354.1	OTTMUST00000120798.1	2	---	---	Gm38228-201		TEC
TetK27	chr1	43560525	43561305	780	43560968	31	22.7693	8.65714	20.656	TetK27_peak_383	Gm38228	ENSMUST00000193169.1	+	43560273	43561566	TTS	252	-261	0.603555	1.000000	---	ENSMUSG00000103945.1	Gm38228	TEC	OTTMUSG00000046354.1	OTTMUST00000120798.1	2	---	---	Gm38228-201		TEC
TetK27	chr1	43561401	43562970	1569	43562479	52	44.8533	12.9016	42.5433	TetK27_peak_384	Gm38228	ENSMUST00000193169.1	+	43560273	43561566	TTS	1128	0	0.128284	0.105732	---	ENSMUSG00000103945.1	Gm38228	TEC	OTTMUSG00000046354.1	OTTMUST00000120798.1	2	---	---	Gm38228-201		TEC
TetK27	chr1	43563055	43563898	843	43563302	27	18.5511	7.57499	16.4886	TetK27_peak_385	Nck2	ENSMUST00000086421.8	+	43445751	43570516	Intron 4	117304	-6618	0.006765	1.000000	CCDS14924.1	ENSMUSG00000066877.11	Nck2	protein_coding	OTTMUSG00000021065.1	OTTMUST00000049828.1	2	---	ENSMUSP00000083611.5	Nck2-201	1	protein_coding
TetK27	chr1	43768540	43768955	415	43768798	13	5.99569	3.7875	4.17465	TetK27_peak_386	Uxs1	ENSMUST00000076997.12	-	43749512	43827742	3' UTR Exon	58787	-19028	0.005318	1.000000	---	ENSMUSG00000057363.12	Uxs1	protein_coding	OTTMUSG00000030350.1	OTTMUST00000075194.1	2	---	ENSMUSP00000076259.6	Uxs1-201	1	nonsense_mediated_decay
TetK27	chr1	43826751	43828755	2004	43827505	140	163.662	29.5684	160.664	TetK27_peak_387	Uxs1	ENSMUST00000134860.7	-	43774866	43827763	TSS	0	-51885	0.019150	0.505237	---	ENSMUSG00000057363.12	Uxs1	protein_coding	OTTMUSG00000030350.1	OTTMUST00000075197.1	2	---	---	Uxs1-204	5	processed_transcript
TetK27	chr1	43880483	43881186	703	43880869	19	7.47473	3.76862	5.62408	TetK27_peak_388	.	.	.	.	.	Intergenic	.	.	.	.	.	.	.	.	.	.	.	.	.	.	.	.
TetK27	chr1	43896762	43897287	525	43897158	19	10.8823	5.41071	8.93972	TetK27_peak_389	.	.	.	.	.	Intergenic	.	.	.	.	.	.	.	.	.	.	.	.	.	.	.	.
TetK27	chr1	43897473	43897859	386	43897718	20	11.7766	5.68125	9.81736	TetK27_peak_390	Gm8241	ENSMUST00000189286.1	+	43898294	43899110	TSS	-435	-1251	0.000000	0.000000	---	ENSMUSG00000101395.1	Gm8241	processed_pseudogene	OTTMUSG00000046399.1	OTTMUST00000120871.1	1	PGO:0000004	---	Gm8241-201		processed_pseudogene
TetK27	chr1	43932696	43934951	2255	43934201	273	364.882	46.8748	360.478	TetK27_peak_391	Tpp2	ENSMUST00000185579.6	+	43933647	43949406	TSS	0	-14455	0.082805	0.578457	---	ENSMUSG00000041763.14	Tpp2	protein_coding	OTTMUSG00000046400.1	OTTMUST00000121126.1	2	---	---	Tpp2-202	3	processed_transcript
TetK27	chr1	43939055	43939375	320	43939345	14	3.78859	2.56614	2.08098	TetK27_peak_392	Tpp2	ENSMUST00000185579.6	+	43933647	43949406	Intron 1	5408	-10031	0.020368	1.000000	---	ENSMUSG00000041763.14	Tpp2	protein_coding	OTTMUSG00000046400.1	OTTMUST00000121126.1	2	---	---	Tpp2-202	3	processed_transcript
TetK27	chr1	43997172	43997776	604	43997378	20	11.758	5.67164	9.80998	TetK27_peak_393	Tpp2	ENSMUST00000190207.1	+	43983285	44003001	Intron 6	13887	-5225	0.030684	1.000000	---	ENSMUSG00000041763.14	Tpp2	protein_coding	OTTMUSG00000046400.1	OTTMUST00000120878.1	2	---	ENSMUSP00000140313.1	Tpp2-209	1	protein_coding
TetK27	chr1	44041916	44042395	479	44042154	18	10.0089	5.14017	8.08393	TetK27_peak_394	.	.	.	.	.	Intergenic	.	.	.	.	.	.	.	.	.	.	.	.	.	.	.	.
TetK27	chr1	44101468	44102810	1342	44102227	166	193.674	30.5898	190.522	TetK27_peak_395	Tex30	ENSMUST00000149502.7	-	44088508	44102438	TSS	0	-12960	0.069701	0.723008	---	ENSMUSG00000026049.11	Tex30	protein_coding	OTTMUSG00000034051.1	OTTMUST00000085995.1	2	---	ENSMUSP00000115939.1	Tex30-210	5	protein_coding
TetK27	chr1	44118162	44120435	2273	44118641	84	92.9907	22.9955	90.3688	TetK27_peak_396	Kdelc1	ENSMUST00000152643.1	-	44114784	44118702	TSS	0	-3378	0.138045	0.237907	---	ENSMUSG00000026047.13	Kdelc1	protein_coding	OTTMUSG00000034049.1	OTTMUST00000086001.1	2	---	ENSMUSP00000114287.1	Kdelc1-205	3	nonsense_mediated_decay
TetK27	chr1	44121856	44123163	1307	44122641	20	11.7766	5.68125	9.81736	TetK27_peak_397	Bivm	ENSMUST00000129068.1	+	44119979	44126408	5' UTR Exon	1877	-3245	0.203421	1.000000	---	ENSMUSG00000041684.11	Bivm	protein_coding	OTTMUSG00000023025.1	OTTMUST00000055467.1	2	---	ENSMUSP00000140490.1	Bivm-203	3	protein_coding
TetK27	chr1	44147146	44148897	1751	44148109	219	283.703	41.4548	279.997	TetK27_peak_398	Ercc5	ENSMUST00000027214.3	+	44147847	44181261	TSS	0	-32364	0.031453	0.599886	CCDS35553.1	ENSMUSG00000026048.16	Ercc5	protein_coding	OTTMUSG00000021431.1	OTTMUST00000050813.1	2	---	ENSMUSP00000027214.3	Ercc5-201	1	protein_coding
TetK27	chr1	45734320	45735368	1048	45734862	29	20.6319	8.11607	18.5431	TetK27_peak_399	.	.	.	.	.	Intergenic	.	.	.	.	.	.	.	.	.	.	.	.	.	.	.	.
TetK27	chr1	45735426	45735747	321	45735557	17	9.15743	4.86964	7.25158	TetK27_peak_400	.	.	.	.	.	Intergenic	.	.	.	.	.	.	.	.	.	.	.	.	.	.	.	.
TetK27	chr1	45794735	45796254	1519	45795287	208	306.835	56.5419	302.951	TetK27_peak_401	Wdr75	ENSMUST00000147308.1	+	45795507	45803930	TSS	0	-7676	0.088794	0.492105	---	ENSMUSG00000025995.16	Wdr75	protein_coding	OTTMUSG00000022347.1	OTTMUST00000053320.1	2	---	ENSMUSP00000117363.1	Wdr75-206	2	protein_coding
TetK27	chr1	45857285	45857723	438	45857485	16	8.32904	4.5991	6.44257	TetK27_peak_402	Gm5526	ENSMUST00000153604.1	-	45857332	45857755	TSS	32	0	0.924528	0.892938	---	ENSMUSG00000084817.3	Gm5526	processed_pseudogene	OTTMUSG00000022092.1	OTTMUST00000052445.1	1	PGO:0000004	---	Gm5526-201		processed_pseudogene
TetK27	chr1	46052936	46053258	322	46053075	28	19.5842	7.84553	17.5081	TetK27_peak_403	.	.	.	.	.	Intergenic	.	.	.	.	.	.	.	.	.	.	.	.	.	.	.	.
TetK27	chr1	46851580	46852071	491	46851864	17	9.15743	4.86964	7.25158	TetK27_peak_404	Slc39a10	ENSMUST00000186852.1	-	46835640	46892853	5' UTR Exon	40782	-15940	0.008599	1.000000	---	ENSMUSG00000025986.6	Slc39a10	protein_coding	OTTMUSG00000021430.1	OTTMUST00000121661.1	2	---	ENSMUSP00000140176.1	Slc39a10-204	3	protein_coding
TetK27	chr1	46852254	46855541	3287	46853102	306	397.279	44.3507	392.549	TetK27_peak_405	Slc39a10	ENSMUST00000027131.5	-	46807544	46854047	TSS	0	-44710	0.038577	0.545620	CCDS14936.1	ENSMUSG00000025986.6	Slc39a10	protein_coding	OTTMUSG00000021430.1	OTTMUST00000050811.1	2	---	ENSMUSP00000027131.4	Slc39a10-201	1	protein_coding
TetK27	chr1	46894438	46895184	746	46894688	36	25.6615	8.74656	23.5213	TetK27_peak_406	.	.	.	.	.	Intergenic	.	.	.	.	.	.	.	.	.	.	.	.	.	.	.	.
TetK27	chr1	46966685	46966973	288	46966760	12	5.2738	3.51696	3.47795	TetK27_peak_407	.	.	.	.	.	Intergenic	.	.	.	.	.	.	.	.	.	.	.	.	.	.	.	.
TetK27	chr1	50025725	50025976	251	50025919	12	5.2738	3.51696	3.47795	TetK27_peak_408	.	.	.	.	.	Intergenic	.	.	.	.	.	.	.	.	.	.	.	.	.	.	.	.
TetK27	chr1	51477090	51479315	2225	51478207	238	329.744	49.9615	325.668	TetK27_peak_409	Nabp1	ENSMUST00000188303.1	-	51475592	51478400	TSS	0	-1498	0.466714	0.588949	---	ENSMUSG00000026107.11	Nabp1	protein_coding	OTTMUSG00000046715.1	OTTMUST00000121335.1	2	---	---	Nabp1-208		retained_intron
TetK27	chr1	51525829	51526242	413	51526059	11	4.58302	3.24643	2.81413	TetK27_peak_410	Gm17767	ENSMUST00000189410.1	-	51509505	51596719	Intron 3	70477	-16324	0.004747	1.000000	---	ENSMUSG00000099413.1	Gm17767	lincRNA	OTTMUSG00000046716.1	OTTMUST00000121337.1	2	---	---	Gm17767-201	1	lincRNA
TetK27	chr1	51570612	51570928	316	51570761	17	9.15743	4.86964	7.25158	TetK27_peak_411	Gm17767	ENSMUST00000189410.1	-	51509505	51596719	Intron 3	25791	-61107	0.003635	1.000000	---	ENSMUSG00000099413.1	Gm17767	lincRNA	OTTMUSG00000046716.1	OTTMUST00000121337.1	2	---	---	Gm17767-201	1	lincRNA
TetK27	chr1	51577641	51578332	691	51577788	25	16.5309	7.03392	14.4964	TetK27_peak_412	Gm17767	ENSMUST00000189410.1	-	51509505	51596719	Intron 3	18387	-68136	0.007934	1.000000	---	ENSMUSG00000099413.1	Gm17767	lincRNA	OTTMUSG00000046716.1	OTTMUST00000121337.1	2	---	---	Gm17767-201	1	lincRNA
TetK27	chr1	51583654	51587193	3539	51585508	117	135.972	27.8944	133.12	TetK27_peak_413	Gm17767	ENSMUST00000189410.1	-	51509505	51596719	Intron 2	9526	-74149	0.040589	1.000000	---	ENSMUSG00000099413.1	Gm17767	lincRNA	OTTMUSG00000046716.1	OTTMUST00000121337.1	2	---	---	Gm17767-201	1	lincRNA
TetK27	chr1	51591841	51592128	287	51592078	12	5.2738	3.51696	3.47795	TetK27_peak_414	Gm17767	ENSMUST00000189410.1	-	51509505	51596719	Intron 1	4591	-82336	0.003302	1.000000	---	ENSMUSG00000099413.1	Gm17767	lincRNA	OTTMUSG00000046716.1	OTTMUST00000121337.1	2	---	---	Gm17767-201	1	lincRNA
TetK27	chr1	51592553	51595627	3074	51594348	76	81.1476	20.8312	78.593	TetK27_peak_415	Gm17767	ENSMUST00000189410.1	-	51509505	51596719	Intron 1	1092	-83048	0.035258	1.000000	---	ENSMUSG00000099413.1	Gm17767	lincRNA	OTTMUSG00000046716.1	OTTMUST00000121337.1	2	---	---	Gm17767-201	1	lincRNA
TetK27	chr1	51596261	51596798	537	51596370	15	7.52498	4.32857	5.65872	TetK27_peak_416	Gm17767	ENSMUST00000189410.1	-	51509505	51596719	TSS	0	-86756	0.005263	0.853160	---	ENSMUSG00000099413.1	Gm17767	lincRNA	OTTMUSG00000046716.1	OTTMUST00000121337.1	2	---	---	Gm17767-201	1	lincRNA
TetK27	chr1	51820310	51820647	337	51820436	20	11.7766	5.68125	9.81736	TetK27_peak_417	Myo1b	ENSMUST00000135125.7	-	51799536	51820547	TSS	0	-20774	0.011327	0.704142	---	ENSMUSG00000018417.14	Myo1b	protein_coding	OTTMUSG00000016470.1	OTTMUST00000039705.1	2	---	---	Myo1b-208	2	processed_transcript
TetK27	chr1	52004261	52004771	510	52004464	30	21.065	8.07763	18.975	TetK27_peak_418	Stat4	ENSMUST00000168302.7	+	51987148	52107190	5' UTR Exon	17113	-102419	0.004257	1.000000	CCDS14943.1	ENSMUSG00000062939.11	Stat4	protein_coding	OTTMUSG00000046732.1	OTTMUST00000121356.1	2	---	ENSMUSP00000130713.1	Stat4-202	1	protein_coding
TetK27	chr1	52004983	52005280	297	52005071	11	4.58302	3.24643	2.81413	TetK27_peak_419	Stat4	ENSMUST00000168302.7	+	51987148	52107190	5' UTR Exon	17835	-101910	0.002482	1.000000	CCDS14943.1	ENSMUSG00000062939.11	Stat4	protein_coding	OTTMUSG00000046732.1	OTTMUST00000121356.1	2	---	ENSMUSP00000130713.1	Stat4-202	1	protein_coding
TetK27	chr1	52007568	52013532	5964	52008843	256	399.799	69.5276	395.04	TetK27_peak_420	Stat4	ENSMUST00000187053.1	+	52008626	52072445	TSS	0	-58913	0.076888	0.822632	---	ENSMUSG00000062939.11	Stat4	protein_coding	OTTMUSG00000046732.1	OTTMUST00000121358.1	2	---	---	Stat4-203	2	retained_intron
TetK27	chr1	52014107	52014824	717	52014589	28	19.5842	7.84553	17.5081	TetK27_peak_421	Stat4	ENSMUST00000187053.1	+	52008626	52072445	Intron 2	5481	-57621	0.011250	1.000000	---	ENSMUSG00000062939.11	Stat4	protein_coding	OTTMUSG00000046732.1	OTTMUST00000121358.1	2	---	---	Stat4-203	2	retained_intron
TetK27	chr1	52016519	52016887	368	52016735	14	4.99608	3.14557	3.22361	TetK27_peak_422	Stat4	ENSMUST00000187053.1	+	52008626	52072445	Intron 2	7893	-55558	0.005782	1.000000	---	ENSMUSG00000062939.11	Stat4	protein_coding	OTTMUSG00000046732.1	OTTMUST00000121358.1	2	---	---	Stat4-203	2	retained_intron
TetK27	chr1	52018702	52020907	2205	52019933	60	54.0219	14.42	51.6442	TetK27_peak_423	Stat4	ENSMUST00000187053.1	+	52008626	52072445	Intron 2	10076	-51538	0.034566	1.000000	---	ENSMUSG00000062939.11	Stat4	protein_coding	OTTMUSG00000046732.1	OTTMUST00000121358.1	2	---	---	Stat4-203	2	retained_intron
TetK27	chr1	52020993	52022880	1887	52022422	38	30.6499	10.5509	28.4563	TetK27_peak_424	Stat4	ENSMUST00000187053.1	+	52008626	52072445	Intron 2	12367	-49565	0.029583	1.000000	---	ENSMUSG00000062939.11	Stat4	protein_coding	OTTMUSG00000046732.1	OTTMUST00000121358.1	2	---	---	Stat4-203	2	retained_intron
TetK27	chr1	52024809	52025206	397	52025058	17	7.96295	4.25508	6.09287	TetK27_peak_425	Stat4	ENSMUST00000187053.1	+	52008626	52072445	Intron 2	16183	-47239	0.006236	1.000000	---	ENSMUSG00000062939.11	Stat4	protein_coding	OTTMUSG00000046732.1	OTTMUST00000121358.1	2	---	---	Stat4-203	2	retained_intron
TetK27	chr1	52033394	52036536	3142	52034988	66	66.8531	18.1259	64.3879	TetK27_peak_426	Stat4	ENSMUST00000187053.1	+	52008626	52072445	Intron 2	24768	-35909	0.049248	1.000000	---	ENSMUSG00000062939.11	Stat4	protein_coding	OTTMUSG00000046732.1	OTTMUST00000121358.1	2	---	---	Stat4-203	2	retained_intron
TetK27	chr1	52038630	52041786	3156	52040278	120	132.813	25.3743	129.978	TetK27_peak_427	Stat4	ENSMUST00000187053.1	+	52008626	52072445	Intron 2	30004	-30659	0.049467	1.000000	---	ENSMUSG00000062939.11	Stat4	protein_coding	OTTMUSG00000046732.1	OTTMUST00000121358.1	2	---	---	Stat4-203	2	retained_intron
TetK27	chr1	52042012	52042679	667	52042252	15	7.52498	4.32857	5.65872	TetK27_peak_428	Stat4	ENSMUST00000187053.1	+	52008626	52072445	Intron 2	33386	-29766	0.010467	1.000000	---	ENSMUSG00000062939.11	Stat4	protein_coding	OTTMUSG00000046732.1	OTTMUST00000121358.1	2	---	---	Stat4-203	2	retained_intron
TetK27	chr1	52046350	52046873	523	52046555	14	6.74667	4.05803	4.90229	TetK27_peak_429	Stat4	ENSMUST00000187053.1	+	52008626	52072445	Intron 2	37724	-25572	0.008211	1.000000	---	ENSMUSG00000062939.11	Stat4	protein_coding	OTTMUSG00000046732.1	OTTMUST00000121358.1	2	---	---	Stat4-203	2	retained_intron
TetK27	chr1	52046978	52047256	278	52047066	13	4.38771	2.93587	2.64425	TetK27_peak_430	Stat4	ENSMUST00000187053.1	+	52008626	52072445	Intron 2	38352	-25189	0.004372	1.000000	---	ENSMUSG00000062939.11	Stat4	protein_coding	OTTMUSG00000046732.1	OTTMUST00000121358.1	2	---	---	Stat4-203	2	retained_intron
TetK27	chr1	52048406	52048813	407	52048584	13	5.99569	3.7875	4.17465	TetK27_peak_431	Stat4	ENSMUST00000187053.1	+	52008626	52072445	Intron 2	39780	-23632	0.006393	1.000000	---	ENSMUSG00000062939.11	Stat4	protein_coding	OTTMUSG00000046732.1	OTTMUST00000121358.1	2	---	---	Stat4-203	2	retained_intron
TetK27	chr1	52051406	52053942	2536	52051917	34	26.0742	9.46874	23.926	TetK27_peak_432	Stat4	ENSMUST00000187053.1	+	52008626	52072445	Intron 2	42780	-18503	0.039752	1.000000	---	ENSMUSG00000062939.11	Stat4	protein_coding	OTTMUSG00000046732.1	OTTMUST00000121358.1	2	---	---	Stat4-203	2	retained_intron
TetK27	chr1	52055586	52056032	446	52055811	20	11.7766	5.68125	9.81736	TetK27_peak_433	Stat4	ENSMUST00000187053.1	+	52008626	52072445	Intron 2	46960	-16413	0.007004	1.000000	---	ENSMUSG00000062939.11	Stat4	protein_coding	OTTMUSG00000046732.1	OTTMUST00000121358.1	2	---	---	Stat4-203	2	retained_intron
TetK27	chr1	52065496	52067422	1926	52066940	28	19.5842	7.84553	17.5081	TetK27_peak_434	Stat4	ENSMUST00000187053.1	+	52008626	52072445	Intron 3	56870	-5023	0.030194	1.000000	---	ENSMUSG00000062939.11	Stat4	protein_coding	OTTMUSG00000046732.1	OTTMUST00000121358.1	2	---	---	Stat4-203	2	retained_intron
TetK27	chr1	52067965	52068608	643	52068466	14	6.74667	4.05803	4.90229	TetK27_peak_435	Stat4	ENSMUST00000187053.1	+	52008626	52072445	Intron 3	59339	-3837	0.010091	1.000000	---	ENSMUSG00000062939.11	Stat4	protein_coding	OTTMUSG00000046732.1	OTTMUST00000121358.1	2	---	---	Stat4-203	2	retained_intron
TetK27	chr1	52075990	52076954	964	52076665	27	18.5511	7.57499	16.4886	TetK27_peak_436	Gm28177	ENSMUST00000185516.1	+	52077261	52156088	TSS	-307	-79134	0.000000	0.000000	---	ENSMUSG00000101628.1	Gm28177	processed_transcript	OTTMUSG00000046882.1	OTTMUST00000121556.1	2	---	---	Gm28177-201	5	processed_transcript
TetK27	chr1	52077540	52078176	636	52077929	34	23.5532	8.27377	21.4365	TetK27_peak_437	Gm28177	ENSMUST00000185516.1	+	52077261	52156088	Intron 1	279	-77912	0.008081	1.000000	---	ENSMUSG00000101628.1	Gm28177	processed_transcript	OTTMUSG00000046882.1	OTTMUST00000121556.1	2	---	---	Gm28177-201	5	processed_transcript
TetK27	chr1	52078367	52079160	793	52078753	28	19.5842	7.84553	17.5081	TetK27_peak_438	Gm28177	ENSMUST00000185516.1	+	52077261	52156088	CDS Exon 2	1106	-76928	0.010073	1.000000	---	ENSMUSG00000101628.1	Gm28177	processed_transcript	OTTMUSG00000046882.1	OTTMUST00000121556.1	2	---	---	Gm28177-201	5	processed_transcript
TetK27	chr1	52079589	52080310	721	52079850	27	18.5511	7.57499	16.4886	TetK27_peak_439	Stat4	ENSMUST00000168302.7	+	51987148	52107190	CDS Exon 11	92441	-26880	0.006015	1.000000	CCDS14943.1	ENSMUSG00000062939.11	Stat4	protein_coding	OTTMUSG00000046732.1	OTTMUST00000121356.1	2	---	ENSMUSP00000130713.1	Stat4-202	1	protein_coding
TetK27	chr1	52083047	52083461	414	52083250	13	5.99569	3.7875	4.17465	TetK27_peak_440	Gm28177	ENSMUST00000185516.1	+	52077261	52156088	CDS Exon 4	5786	-72627	0.005265	1.000000	---	ENSMUSG00000101628.1	Gm28177	processed_transcript	OTTMUSG00000046882.1	OTTMUST00000121556.1	2	---	---	Gm28177-201	5	processed_transcript
TetK27	chr1	52096672	52096923	251	52096876	14	6.74667	4.05803	4.90229	TetK27_peak_441	Gm28177	ENSMUST00000185516.1	+	52077261	52156088	CDS Exon 5	19411	-59165	0.003197	1.000000	---	ENSMUSG00000101628.1	Gm28177	processed_transcript	OTTMUSG00000046882.1	OTTMUST00000121556.1	2	---	---	Gm28177-201	5	processed_transcript
TetK27	chr1	52098678	52098995	317	52098874	19	10.8823	5.41071	8.93972	TetK27_peak_442	Gm28177	ENSMUST00000185516.1	+	52077261	52156088	Intron 6	21417	-57093	0.004034	1.000000	---	ENSMUSG00000101628.1	Gm28177	processed_transcript	OTTMUSG00000046882.1	OTTMUST00000121556.1	2	---	---	Gm28177-201	5	processed_transcript
TetK27	chr1	52099185	52099560	375	52099339	16	8.31447	4.59133	6.44201	TetK27_peak_443	Gm28177	ENSMUST00000185516.1	+	52077261	52156088	Intron 6	21924	-56528	0.004770	1.000000	---	ENSMUSG00000101628.1	Gm28177	processed_transcript	OTTMUSG00000046882.1	OTTMUST00000121556.1	2	---	---	Gm28177-201	5	processed_transcript
TetK27	chr1	52099632	52101196	1564	52100447	34	26.0742	9.46874	23.926	TetK27_peak_444	Gm28177	ENSMUST00000185516.1	+	52077261	52156088	CDS Exon 7	22371	-54892	0.019853	1.000000	---	ENSMUSG00000101628.1	Gm28177	processed_transcript	OTTMUSG00000046882.1	OTTMUST00000121556.1	2	---	---	Gm28177-201	5	processed_transcript
TetK27	chr1	52111334	52111585	251	52111430	13	5.99569	3.7875	4.17465	TetK27_peak_445	Gm31812	ENSMUST00000210323.1	-	52108121	52113752	Intron 1	2167	-3213	0.044744	1.000000	---	ENSMUSG00000109599.1	Gm31812	lincRNA	OTTMUSG00000060782.1	OTTMUST00000148595.1	2	---	---	Gm31812-201	3	lincRNA
TetK27	chr1	52112348	52114598	2250	52113550	213	316.313	57.8946	312.351	TetK27_peak_446	Gm31812	ENSMUST00000210323.1	-	52108121	52113752	TSS	0	-4227	0.249467	0.624167	---	ENSMUSG00000109599.1	Gm31812	lincRNA	OTTMUSG00000060782.1	OTTMUST00000148595.1	2	---	---	Gm31812-201	3	lincRNA
TetK27	chr1	52116354	52116946	592	52116731	27	18.5511	7.57499	16.4886	TetK27_peak_447	Gm28177	ENSMUST00000185516.1	+	52077261	52156088	Intron 12	39093	-39142	0.007523	1.000000	---	ENSMUSG00000101628.1	Gm28177	processed_transcript	OTTMUSG00000046882.1	OTTMUST00000121556.1	2	---	---	Gm28177-201	5	processed_transcript
TetK27	chr1	52117006	52117313	307	52117148	15	7.52498	4.32857	5.65872	TetK27_peak_448	Gm28177	ENSMUST00000185516.1	+	52077261	52156088	Intron 12	39745	-38775	0.003907	1.000000	---	ENSMUSG00000101628.1	Gm28177	processed_transcript	OTTMUSG00000046882.1	OTTMUST00000121556.1	2	---	---	Gm28177-201	5	processed_transcript
TetK27	chr1	52117554	52118160	606	52117988	19	10.8823	5.41071	8.93972	TetK27_peak_449	Gm28177	ENSMUST00000185516.1	+	52077261	52156088	Intron 12	40293	-37928	0.007700	1.000000	---	ENSMUSG00000101628.1	Gm28177	processed_transcript	OTTMUSG00000046882.1	OTTMUST00000121556.1	2	---	---	Gm28177-201	5	processed_transcript
TetK27	chr1	52118308	52121902	3594	52119637	204	269.946	42.9895	266.335	TetK27_peak_450	Stat1	ENSMUST00000186057.6	+	52119624	52160731	TSS	0	-38829	0.055439	0.633936	CCDS78581.1	ENSMUSG00000026104.14	Stat1	protein_coding	OTTMUSG00000046734.1	OTTMUST00000121564.1	2	---	ENSMUSP00000141132.1	Stat1-203	1	protein_coding
TetK27	chr1	52122289	52122996	707	52122491	18	10.0089	5.14017	8.08393	TetK27_peak_451	Stat1	ENSMUST00000186057.6	+	52119624	52160731	CDS Exon 3	2665	-37735	0.017223	1.000000	CCDS78581.1	ENSMUSG00000026104.14	Stat1	protein_coding	OTTMUSG00000046734.1	OTTMUST00000121564.1	2	---	ENSMUSP00000141132.1	Stat1-203	1	protein_coding
TetK27	chr1	52123731	52124008	277	52123813	14	6.74667	4.05803	4.90229	TetK27_peak_452	Stat1	ENSMUST00000186057.6	+	52119624	52160731	Intron 4	4107	-36723	0.006763	1.000000	CCDS78581.1	ENSMUSG00000026104.14	Stat1	protein_coding	OTTMUSG00000046734.1	OTTMUST00000121564.1	2	---	ENSMUSP00000141132.1	Stat1-203	1	protein_coding
TetK27	chr1	52124549	52125612	1063	52124746	26	15.6375	6.38262	13.6156	TetK27_peak_453	Stat1	ENSMUST00000186057.6	+	52119624	52160731	Intron 4	4925	-35119	0.025883	1.000000	CCDS78581.1	ENSMUSG00000026104.14	Stat1	protein_coding	OTTMUSG00000046734.1	OTTMUST00000121564.1	2	---	ENSMUSP00000141132.1	Stat1-203	1	protein_coding
TetK27	chr1	52125819	52126417	598	52126178	25	14.2689	5.9384	12.2742	TetK27_peak_454	Stat1	ENSMUST00000186057.6	+	52119624	52160731	Intron 4	6195	-34314	0.014571	1.000000	CCDS78581.1	ENSMUSG00000026104.14	Stat1	protein_coding	OTTMUSG00000046734.1	OTTMUST00000121564.1	2	---	ENSMUSP00000141132.1	Stat1-203	1	protein_coding
TetK27	chr1	52126591	52127686	1095	52126964	25	16.5309	7.03392	14.4964	TetK27_peak_455	Stat1	ENSMUST00000186057.6	+	52119624	52160731	CDS Exon 5	6967	-33045	0.026661	1.000000	CCDS78581.1	ENSMUSG00000026104.14	Stat1	protein_coding	OTTMUSG00000046734.1	OTTMUST00000121564.1	2	---	ENSMUSP00000141132.1	Stat1-203	1	protein_coding
TetK27	chr1	52128678	52130375	1697	52129783	20	9.1644	4.4038	7.25768	TetK27_peak_456	Stat1	ENSMUST00000186057.6	+	52119624	52160731	Intron 5	9054	-30356	0.041306	1.000000	CCDS78581.1	ENSMUSG00000026104.14	Stat1	protein_coding	OTTMUSG00000046734.1	OTTMUST00000121564.1	2	---	ENSMUSP00000141132.1	Stat1-203	1	protein_coding
TetK27	chr1	52131639	52133954	2315	52132914	37	29.4889	10.2804	27.3063	TetK27_peak_457	Stat1	ENSMUST00000188681.6	+	52119498	52132634	TTS	12141	0	0.075816	0.430052	---	ENSMUSG00000026104.14	Stat1	protein_coding	OTTMUSG00000046734.1	OTTMUST00000121560.1	2	---	ENSMUSP00000141144.1	Stat1-207	2	protein_coding
TetK27	chr1	52134078	52134676	598	52134508	17	8.50705	4.5307	6.61891	TetK27_peak_458	Gm18301	ENSMUST00000185261.1	-	52134443	52135331	TTS	655	0	0.263217	0.390651	---	ENSMUSG00000099569.1	Gm18301	unprocessed_pseudogene	OTTMUSG00000046883.1	OTTMUST00000121569.1	1	PGO:0000005	---	Gm18301-201		unprocessed_pseudogene
TetK27	chr1	52134776	52135442	666	52134974	14	6.74667	4.05803	4.90229	TetK27_peak_459	Gm18301	ENSMUST00000185261.1	-	52134443	52135331	TSS	0	-333	0.625422	0.833583	---	ENSMUSG00000099569.1	Gm18301	unprocessed_pseudogene	OTTMUSG00000046883.1	OTTMUST00000121569.1	1	PGO:0000005	---	Gm18301-201		unprocessed_pseudogene
TetK27	chr1	52137782	52138362	580	52137888	14	5.78446	3.5459	3.98249	TetK27_peak_460	Stat1	ENSMUST00000185743.1	+	52119572	52137853	TTS	18210	0	0.003938	0.123924	---	ENSMUSG00000026104.14	Stat1	protein_coding	OTTMUSG00000046734.1	OTTMUST00000121563.1	2	---	---	Stat1-202	1	retained_intron
TetK27	chr1	52138621	52138989	368	52138821	12	5.2738	3.51696	3.47795	TetK27_peak_461	Stat1	ENSMUST00000186057.6	+	52119624	52160731	Intron 9	18997	-21742	0.008976	1.000000	CCDS78581.1	ENSMUSG00000026104.14	Stat1	protein_coding	OTTMUSG00000046734.1	OTTMUST00000121564.1	2	---	ENSMUSP00000141132.1	Stat1-203	1	protein_coding
TetK27	chr1	52139615	52140003	388	52139779	18	10.0089	5.14017	8.08393	TetK27_peak_462	Stat1	ENSMUST00000186057.6	+	52119624	52160731	Intron 10	19991	-20728	0.009463	1.000000	CCDS78581.1	ENSMUSG00000026104.14	Stat1	protein_coding	OTTMUSG00000046734.1	OTTMUST00000121564.1	2	---	ENSMUSP00000141132.1	Stat1-203	1	protein_coding
TetK27	chr1	52140310	52140562	252	52140479	14	4.99608	3.14557	3.22361	TetK27_peak_463	Stat1	ENSMUST00000186057.6	+	52119624	52160731	Intron 10	20686	-20169	0.006155	1.000000	CCDS78581.1	ENSMUSG00000026104.14	Stat1	protein_coding	OTTMUSG00000046734.1	OTTMUST00000121564.1	2	---	ENSMUSP00000141132.1	Stat1-203	1	protein_coding
TetK27	chr1	52141601	52142515	914	52142290	24	15.5448	6.76339	13.5242	TetK27_peak_464	Stat1	ENSMUST00000186057.6	+	52119624	52160731	Intron 11	21977	-18216	0.022258	1.000000	CCDS78581.1	ENSMUSG00000026104.14	Stat1	protein_coding	OTTMUSG00000046734.1	OTTMUST00000121564.1	2	---	ENSMUSP00000141132.1	Stat1-203	1	protein_coding
TetK27	chr1	52142755	52146811	4056	52143530	34	26.0742	9.46874	23.926	TetK27_peak_465	Stat1	ENSMUST00000186057.6	+	52119624	52160731	CDS Exon 12	23131	-13920	0.098691	1.000000	CCDS78581.1	ENSMUSG00000026104.14	Stat1	protein_coding	OTTMUSG00000046734.1	OTTMUST00000121564.1	2	---	ENSMUSP00000141132.1	Stat1-203	1	protein_coding
TetK27	chr1	52148790	52149262	472	52148984	16	7.21211	4.01869	5.36317	TetK27_peak_466	Stat1	ENSMUST00000189075.1	+	52150104	52152400	TSS	-842	-3138	0.000000	0.000000	---	ENSMUSG00000026104.14	Stat1	protein_coding	OTTMUSG00000046734.1	OTTMUST00000121565.1	2	---	---	Stat1-208	2	retained_intron
TetK27	chr1	52149395	52151798	2403	52150891	47	41.563	12.9857	39.2757	TetK27_peak_467	Stat1	ENSMUST00000189336.1	+	52152253	52159561	TSS	-455	-7763	0.000000	0.000000	---	ENSMUSG00000026104.14	Stat1	protein_coding	OTTMUSG00000046734.1	OTTMUST00000121567.1	2	---	ENSMUSP00000140643.1	Stat1-210	3	nonsense_mediated_decay
TetK27	chr1	52154558	52154850	292	52154620	15	7.52498	4.32857	5.65872	TetK27_peak_468	Stat1	ENSMUST00000189347.6	+	52119549	52155332	TTS	35009	-482	0.008188	1.000000	---	ENSMUSG00000026104.14	Stat1	protein_coding	OTTMUSG00000046734.1	OTTMUST00000121561.1	2	---	ENSMUSP00000141125.1	Stat1-211	5	protein_coding
TetK27	chr1	52156680	52156931	251	52156794	17	7.96295	4.25508	6.09287	TetK27_peak_469	Stat1	ENSMUST00000189336.1	+	52152253	52159561	3' UTR Exon	4427	-2630	0.034478	1.000000	---	ENSMUSG00000026104.14	Stat1	protein_coding	OTTMUSG00000046734.1	OTTMUST00000121567.1	2	---	ENSMUSP00000140643.1	Stat1-210	3	nonsense_mediated_decay
TetK27	chr1	52157697	52158043	346	52157868	13	5.99569	3.7875	4.17465	TetK27_peak_470	Stat1	ENSMUST00000189336.1	+	52152253	52159561	3' UTR Exon	5444	-1518	0.047476	1.000000	---	ENSMUSG00000026104.14	Stat1	protein_coding	OTTMUSG00000046734.1	OTTMUST00000121567.1	2	---	ENSMUSP00000140643.1	Stat1-210	3	nonsense_mediated_decay
TetK27	chr1	52158288	52158578	290	52158427	13	5.99569	3.7875	4.17465	TetK27_peak_471	Stat1	ENSMUST00000189336.1	+	52152253	52159561	TTS	6035	-983	0.039814	1.000000	---	ENSMUSG00000026104.14	Stat1	protein_coding	OTTMUSG00000046734.1	OTTMUST00000121567.1	2	---	ENSMUSP00000140643.1	Stat1-210	3	nonsense_mediated_decay
TetK27	chr1	52166094	52167304	1210	52166988	53	41.8554	11.3241	39.566	TetK27_peak_472	Gls	ENSMUST00000136654.1	-	52166264	52168976	TTS	1672	0	0.383708	0.859620	---	ENSMUSG00000026103.14	Gls	protein_coding	OTTMUSG00000021410.1	OTTMUST00000050776.1	2	---	---	Gls-208	3	retained_intron
TetK27	chr1	52225867	52226118	251	52225982	13	5.99569	3.7875	4.17465	TetK27_peak_473	Gls	ENSMUST00000114512.7	-	52165941	52232297	5' UTR Exon	6179	-59926	0.003798	1.000000	---	ENSMUSG00000026103.14	Gls	protein_coding	OTTMUSG00000021410.1	OTTMUST00000050761.1	2	---	ENSMUSP00000110157.1	Gls-203	5	protein_coding
TetK27	chr1	52231160	52234222	3062	52232831	276	302.564	28.8123	298.717	TetK27_peak_474	Gls	ENSMUST00000114513.8	-	52163448	52233224	TSS	0	-67712	0.029594	0.674176	CCDS35561.1	ENSMUSG00000026103.14	Gls	protein_coding	OTTMUSG00000021410.1	OTTMUST00000050744.1	2	---	ENSMUSP00000110158.2	Gls-204	5	protein_coding
TetK27	chr1	52363167	52363567	400	52363220	12	5.2738	3.51696	3.47795	TetK27_peak_475	.	.	.	.	.	Intergenic	.	.	.	.	.	.	.	.	.	.	.	.	.	.	.	.
TetK27	chr1	52363679	52367666	3987	52366676	65	60.5078	15.602	58.085	TetK27_peak_476	.	.	.	.	.	Intergenic	.	.	.	.	.	.	.	.	.	.	.	.	.	.	.	.
TetK27	chr1	52367947	52368422	475	52368181	24	15.5223	6.75196	13.5116	TetK27_peak_477	.	.	.	.	.	Intergenic	.	.	.	.	.	.	.	.	.	.	.	.	.	.	.	.
TetK27	chr1	52373249	52376218	2969	52374470	74	67.7956	15.7279	65.3269	TetK27_peak_478	.	.	.	.	.	Intergenic	.	.	.	.	.	.	.	.	.	.	.	.	.	.	.	.
TetK27	chr1	52386353	52386637	284	52386540	11	4.58302	3.24643	2.81413	TetK27_peak_479	.	.	.	.	.	Intergenic	.	.	.	.	.	.	.	.	.	.	.	.	.	.	.	.
TetK27	chr1	52387097	52389808	2711	52389170	39	31.822	10.8214	29.6171	TetK27_peak_480	.	.	.	.	.	Intergenic	.	.	.	.	.	.	.	.	.	.	.	.	.	.	.	.
TetK27	chr1	52389993	52390601	608	52390403	13	5.99569	3.7875	4.17465	TetK27_peak_481	.	.	.	.	.	Intergenic	.	.	.	.	.	.	.	.	.	.	.	.	.	.	.	.
TetK27	chr1	52391884	52393069	1185	52392887	23	14.5757	6.49285	12.5699	TetK27_peak_482	.	.	.	.	.	Intergenic	.	.	.	.	.	.	.	.	.	.	.	.	.	.	.	.
TetK27	chr1	52421977	52422462	485	52422319	11	3.85142	2.83672	2.13865	TetK27_peak_483	.	.	.	.	.	Intergenic	.	.	.	.	.	.	.	.	.	.	.	.	.	.	.	.
TetK27	chr1	52450269	52450570	301	52450355	17	7.67292	4.1112	5.80635	TetK27_peak_484	.	.	.	.	.	Intergenic	.	.	.	.	.	.	.	.	.	.	.	.	.	.	.	.
TetK27	chr1	52450763	52451051	288	52450862	18	6.80246	3.58019	4.95752	TetK27_peak_485	.	.	.	.	.	Intergenic	.	.	.	.	.	.	.	.	.	.	.	.	.	.	.	.
TetK27	chr1	52452620	52456225	3605	52454769	56	53.2036	15.4205	50.829	TetK27_peak_486	.	.	.	.	.	Intergenic	.	.	.	.	.	.	.	.	.	.	.	.	.	.	.	.
TetK27	chr1	52456580	52457342	762	52457190	22	13.6241	6.22232	11.6331	TetK27_peak_487	Nab1	ENSMUST00000069792.13	-	52457294	52500680	TTS	43338	0	0.001129	0.064220	CCDS14944.1	ENSMUSG00000002881.14	Nab1	protein_coding	OTTMUSG00000035900.1	OTTMUST00000092056.1	2	---	ENSMUSP00000066696.7	Nab1-201	1	protein_coding
TetK27	chr1	52470958	52471379	421	52471195	19	9.53241	4.72787	7.62311	TetK27_peak_488	Nab1	ENSMUST00000069792.13	-	52457294	52500680	Intron 4	29301	-13664	0.009726	1.000000	CCDS14944.1	ENSMUSG00000002881.14	Nab1	protein_coding	OTTMUSG00000035900.1	OTTMUST00000092056.1	2	---	ENSMUSP00000066696.7	Nab1-201	1	protein_coding
TetK27	chr1	52491302	52491647	345	52491532	14	6.74667	4.05803	4.90229	TetK27_peak_489	Nab1	ENSMUST00000170269.1	-	52459218	52490737	TSS	-565	-32084	0.000000	0.000000	---	ENSMUSG00000002881.14	Nab1	protein_coding	OTTMUSG00000035900.1	OTTMUST00000092057.1	2	---	ENSMUSP00000131239.1	Nab1-204	5	protein_coding
TetK27	chr1	52492949	52493553	604	52493334	17	7.96295	4.25508	6.09287	TetK27_peak_490	Nab1	ENSMUST00000069792.13	-	52457294	52500680	5' UTR Exon	7127	-35655	0.013944	1.000000	CCDS14944.1	ENSMUSG00000002881.14	Nab1	protein_coding	OTTMUSG00000035900.1	OTTMUST00000092056.1	2	---	ENSMUSP00000066696.7	Nab1-201	1	protein_coding
TetK27	chr1	52496763	52497190	427	52496784	14	3.31601	2.34973	1.61124	TetK27_peak_491	Nab1	ENSMUST00000069792.13	-	52457294	52500680	5' UTR Exon	3490	-39469	0.009865	1.000000	CCDS14944.1	ENSMUSG00000002881.14	Nab1	protein_coding	OTTMUSG00000035900.1	OTTMUST00000092056.1	2	---	ENSMUSP00000066696.7	Nab1-201	1	protein_coding
TetK27	chr1	52498697	52502614	3917	52500211	304	345.385	31.7247	341.168	TetK27_peak_492	Nab1	ENSMUST00000168082.1	-	52490310	52500316	TSS	0	-8387	0.161887	0.413476	---	ENSMUSG00000002881.14	Nab1	protein_coding	OTTMUSG00000035900.1	OTTMUST00000092059.1	2	---	---	Nab1-203	3	processed_transcript
TetK27	chr1	52503101	52503636	535	52503320	15	7.51141	4.32125	5.65872	TetK27_peak_493	Gm5976	ENSMUST00000180794.1	-	52503234	52504230	TTS	594	0	0.404213	0.751866	---	ENSMUSG00000097833.1	Gm5976	processed_pseudogene	OTTMUSG00000042716.1	OTTMUST00000112450.1	1	PGO:0000004	---	Gm5976-201		processed_pseudogene
TetK27	chr1	52578038	52578673	635	52578275	17	9.15743	4.86964	7.25158	TetK27_peak_494	Gm553	ENSMUST00000189527.1	+	52522902	52582680	Intron 4	55136	-4007	0.010639	1.000000	---	ENSMUSG00000100120.1	Gm553	lincRNA	OTTMUSG00000046887.1	OTTMUST00000121577.1	2	---	---	Gm553-201	1	lincRNA
TetK27	chr1	52597898	52598482	584	52598125	20	10.3489	4.96426	8.42147	TetK27_peak_495	.	.	.	.	.	Intergenic	.	.	.	.	.	.	.	.	.	.	.	.	.	.	.	.
TetK27	chr1	52630232	52632353	2121	52630824	296	405.614	50.8096	400.793	TetK27_peak_496	Nemp2	ENSMUST00000190108.6	+	52630752	52650730	TSS	0	-18377	0.080184	0.754948	---	ENSMUSG00000043015.15	Nemp2	protein_coding	OTTMUSG00000046917.1	OTTMUST00000121626.1	2	---	---	Nemp2-206	1	retained_intron
TetK27	chr1	52632667	52633243	576	52632993	15	6.48548	3.7823	4.65898	TetK27_peak_497	Nemp2	ENSMUST00000190108.6	+	52630752	52650730	CDS Exon 1	1915	-17487	0.028880	1.000000	---	ENSMUSG00000043015.15	Nemp2	protein_coding	OTTMUSG00000046917.1	OTTMUST00000121626.1	2	---	---	Nemp2-206	1	retained_intron
TetK27	chr1	52634329	52634853	524	52634472	16	8.32904	4.5991	6.44257	TetK27_peak_498	Nemp2	ENSMUST00000190108.6	+	52630752	52650730	Intron 1	3577	-15877	0.026278	1.000000	---	ENSMUSG00000043015.15	Nemp2	protein_coding	OTTMUSG00000046917.1	OTTMUST00000121626.1	2	---	---	Nemp2-206	1	retained_intron
TetK27	chr1	52635319	52635629	310	52635428	18	10.0089	5.14017	8.08393	TetK27_peak_499	Nemp2	ENSMUST00000190108.6	+	52630752	52650730	Intron 1	4567	-15101	0.015566	1.000000	---	ENSMUSG00000043015.15	Nemp2	protein_coding	OTTMUSG00000046917.1	OTTMUST00000121626.1	2	---	---	Nemp2-206	1	retained_intron
TetK27	chr1	52638980	52639350	370	52639189	12	5.2738	3.51696	3.47795	TetK27_peak_500	Nemp2	ENSMUST00000190108.6	+	52630752	52650730	Intron 2	8228	-11380	0.018569	1.000000	---	ENSMUSG00000043015.15	Nemp2	protein_coding	OTTMUSG00000046917.1	OTTMUST00000121626.1	2	---	---	Nemp2-206	1	retained_intron
TetK27	chr1	52649665	52650612	947	52650077	26	14.0544	5.66203	12.0604	TetK27_peak_501	Nemp2	ENSMUST00000185790.6	+	52630797	52650703	TTS	18868	-91	0.047621	1.000000	---	ENSMUSG00000043015.15	Nemp2	protein_coding	OTTMUSG00000046917.1	OTTMUST00000121627.1	2	---	ENSMUSP00000140351.1	Nemp2-203	1	nonsense_mediated_decay
TetK27	chr1	52650836	52654143	3307	52653030	61	59.9416	16.7732	57.5219	TetK27_peak_502	Nemp2	ENSMUST00000188507.6	+	52630737	52651920	TTS	20099	0	0.051218	0.327993	---	ENSMUSG00000043015.15	Nemp2	protein_coding	OTTMUSG00000046917.1	OTTMUST00000121624.1	2	---	ENSMUSP00000140152.1	Nemp2-205	1	nonsense_mediated_decay
TetK27	chr1	52654420	52655687	1267	52655072	30	19.4856	7.3282	17.419	TetK27_peak_503	Gm37242	ENSMUST00000191873.1	-	52653808	52655893	TTS	206	-612	0.607862	1.000000	---	ENSMUSG00000103630.1	Gm37242	TEC	OTTMUSG00000046918.1	OTTMUST00000121631.1	2	---	---	Gm37242-201		TEC
TetK27	chr1	52726069	52727992	1923	52727034	197	188.849	20.5951	185.723	TetK27_peak_504	Mfsd6	ENSMUST00000087701.3	-	52659986	52727463	TSS	0	-66083	0.020673	0.725052	CCDS14946.1	ENSMUSG00000041439.15	Mfsd6	protein_coding	OTTMUSG00000033382.1	OTTMUST00000083798.1	2	---	ENSMUSP00000084991.3	Mfsd6-201	1	protein_coding
TetK27	chr1	52764046	52764436	390	52764253	17	9.15743	4.86964	7.25158	TetK27_peak_505	.	.	.	.	.	Intergenic	.	.	.	.	.	.	.	.	.	.	.	.	.	.	.	.
TetK27	chr1	52794050	52794612	562	52794468	14	6.74667	4.05803	4.90229	TetK27_peak_506	Inpp1	ENSMUST00000162576.7	-	52794665	52817569	TTS	22957	53	0.000000	0.000000	---	ENSMUSG00000026102.9	Inpp1	protein_coding	OTTMUSG00000026596.1	OTTMUST00000065808.1	2	---	ENSMUSP00000124890.1	Inpp1-205	5	protein_coding
TetK27	chr1	52795404	52796253	849	52795812	18	10.0089	5.14017	8.08393	TetK27_peak_507	Inpp1	ENSMUST00000159607.1	-	52790056	52795049	TSS	-355	-5348	0.000000	0.000000	---	ENSMUSG00000026102.9	Inpp1	protein_coding	OTTMUSG00000026596.1	OTTMUST00000065811.1	2	---	---	Inpp1-202	3	retained_intron
TetK27	chr1	52797062	52797521	459	52797312	18	10.0089	5.14017	8.08393	TetK27_peak_508	Inpp1	ENSMUST00000159725.1	-	52797066	52800372	TTS	2851	0	0.137889	0.991304	---	ENSMUSG00000026102.9	Inpp1	protein_coding	OTTMUSG00000026596.1	OTTMUST00000065810.1	2	---	ENSMUSP00000123977.1	Inpp1-203	3	protein_coding
TetK27	chr1	52797734	52803245	5511	52799944	169	234.792	45.991	231.406	TetK27_peak_509	Inpp1	ENSMUST00000177279.7	-	52789668	52799489	TSS	0	-8066	0.178782	0.318578	---	ENSMUSG00000026102.9	Inpp1	protein_coding	OTTMUSG00000026596.1	OTTMUST00000111209.1	2	---	ENSMUSP00000135225.1	Inpp1-206	5	nonsense_mediated_decay
TetK27	chr1	52815277	52815752	475	52815517	17	9.15743	4.86964	7.25158	TetK27_peak_510	Inpp1	ENSMUST00000162576.7	-	52794665	52817569	5' UTR Exon	1817	-20612	0.020781	1.000000	---	ENSMUSG00000026102.9	Inpp1	protein_coding	OTTMUSG00000026596.1	OTTMUST00000065808.1	2	---	ENSMUSP00000124890.1	Inpp1-205	5	protein_coding
TetK27	chr1	52816260	52818555	2295	52817401	209	292.123	49.4915	288.355	TetK27_peak_511	Inpp1	ENSMUST00000162351.1	-	52796979	52817452	TSS	0	-19281	0.058269	0.519599	---	ENSMUSG00000026102.9	Inpp1	protein_coding	OTTMUSG00000026596.1	OTTMUST00000065809.1	2	---	---	Inpp1-204	2	retained_intron
TetK27	chr1	52844052	52845924	1872	52845269	172	240.207	46.8026	236.787	TetK27_peak_512	Hibch	ENSMUST00000159352.7	+	52845013	52920982	TSS	0	-75058	0.012005	0.486919	---	ENSMUSG00000041426.12	Hibch	protein_coding	OTTMUSG00000030558.1	OTTMUST00000075677.1	1	---	ENSMUSP00000124976.1	Hibch-202	5	protein_coding
TetK27	chr1	52853686	52853937	251	52853837	12	4.46559	3.07312	2.71949	TetK27_peak_513	Hibch	ENSMUST00000159352.7	+	52845013	52920982	CDS Exon 2	8673	-67045	0.003317	1.000000	---	ENSMUSG00000041426.12	Hibch	protein_coding	OTTMUSG00000030558.1	OTTMUST00000075677.1	1	---	ENSMUSP00000124976.1	Hibch-202	5	protein_coding
TetK27	chr1	52856034	52857615	1581	52856578	60	58.5796	16.5027	56.1688	TetK27_peak_514	Hibch	ENSMUST00000159352.7	+	52845013	52920982	Intron 2	11021	-63367	0.020824	1.000000	---	ENSMUSG00000041426.12	Hibch	protein_coding	OTTMUSG00000030558.1	OTTMUST00000075677.1	1	---	ENSMUSP00000124976.1	Hibch-202	5	protein_coding
TetK27	chr1	52863181	52864151	970	52863935	21	11.1852	5.20066	9.24014	TetK27_peak_515	Hibch	ENSMUST00000159431.1	+	52865089	52901321	TSS	-938	-37170	0.000000	0.000000	---	ENSMUSG00000041426.12	Hibch	protein_coding	OTTMUSG00000030558.1	OTTMUST00000075679.1	2	---	---	Hibch-203	3	processed_transcript
TetK27	chr1	52922806	52923064	258	52922902	14	6.74667	4.05803	4.90229	TetK27_peak_516	1700019D03Rik	ENSMUST00000114492.7	-	52922324	52953351	TTS	30287	-482	0.008347	1.000000	CCDS14949.1	ENSMUSG00000043629.12	1700019D03Rik	protein_coding	OTTMUSG00000021472.1	OTTMUST00000050905.1	2	---	ENSMUSP00000110136.1	1700019D03Rik-202	3	protein_coding
TetK27	chr1	52923665	52923937	272	52923870	12	5.2738	3.51696	3.47795	TetK27_peak_517	1700019D03Rik	ENSMUST00000114492.7	-	52922324	52953351	3' UTR Exon	29414	-1341	0.008799	1.000000	CCDS14949.1	ENSMUSG00000043629.12	1700019D03Rik	protein_coding	OTTMUSG00000021472.1	OTTMUST00000050905.1	2	---	ENSMUSP00000110136.1	1700019D03Rik-202	3	protein_coding
TetK27	chr1	52924167	52924898	731	52924490	22	13.6241	6.22232	11.6331	TetK27_peak_518	1700019D03Rik	ENSMUST00000114492.7	-	52922324	52953351	3' UTR Exon	28453	-1843	0.023592	1.000000	CCDS14949.1	ENSMUSG00000043629.12	1700019D03Rik	protein_coding	OTTMUSG00000021472.1	OTTMUST00000050905.1	2	---	ENSMUSP00000110136.1	1700019D03Rik-202	3	protein_coding
TetK27	chr1	52948051	52950401	2350	52950023	38	30.6499	10.5509	28.4563	TetK27_peak_519	1700019D03Rik	ENSMUST00000114492.7	-	52922324	52953351	5' UTR Exon	2950	-25727	0.075770	1.000000	CCDS14949.1	ENSMUSG00000043629.12	1700019D03Rik	protein_coding	OTTMUSG00000021472.1	OTTMUST00000050905.1	2	---	ENSMUSP00000110136.1	1700019D03Rik-202	3	protein_coding
TetK27	chr1	52950754	52953750	2996	52952722	144	161.808	27.3225	158.821	TetK27_peak_520	1700019D03Rik	ENSMUST00000050567.10	-	52922324	52952845	TSS	0	-28430	0.068541	0.698031	CCDS14949.1	ENSMUSG00000043629.12	1700019D03Rik	protein_coding	OTTMUSG00000021472.1	OTTMUST00000050904.1	2	---	ENSMUSP00000055413.4	1700019D03Rik-201	1	protein_coding
TetK27	chr1	53009356	53009751	395	53009594	14	6.74667	4.05803	4.90229	TetK27_peak_521	1700019D03Rik	ENSMUST00000191441.1	-	52925183	53020180	5' UTR Exon	10429	-84173	0.004169	1.000000	CCDS14949.1	ENSMUSG00000043629.12	1700019D03Rik	protein_coding	OTTMUSG00000021472.1	OTTMUST00000121580.1	2	---	ENSMUSP00000139750.1	1700019D03Rik-207	3	protein_coding
TetK27	chr1	53010048	53012755	2707	53010933	30	21.6652	8.37243	19.5717	TetK27_peak_522	1700019D03Rik	ENSMUST00000191441.1	-	52925183	53020180	5' UTR Exon	7425	-84865	0.028506	1.000000	CCDS14949.1	ENSMUSG00000043629.12	1700019D03Rik	protein_coding	OTTMUSG00000021472.1	OTTMUST00000121580.1	2	---	ENSMUSP00000139750.1	1700019D03Rik-207	3	protein_coding
TetK27	chr1	53013290	53013642	352	53013435	16	8.32904	4.5991	6.44257	TetK27_peak_523	1700019D03Rik	ENSMUST00000191441.1	-	52925183	53020180	5' UTR Exon	6538	-88107	0.003716	1.000000	CCDS14949.1	ENSMUSG00000043629.12	1700019D03Rik	protein_coding	OTTMUSG00000021472.1	OTTMUST00000121580.1	2	---	ENSMUSP00000139750.1	1700019D03Rik-207	3	protein_coding
TetK27	chr1	53015297	53015956	659	53015813	22	13.6241	6.22232	11.6331	TetK27_peak_524	1700019D03Rik	ENSMUST00000191441.1	-	52925183	53020180	5' UTR Exon	4224	-90114	0.006948	1.000000	CCDS14949.1	ENSMUSG00000043629.12	1700019D03Rik	protein_coding	OTTMUSG00000021472.1	OTTMUST00000121580.1	2	---	ENSMUSP00000139750.1	1700019D03Rik-207	3	protein_coding
TetK27	chr1	53017402	53017673	271	53017476	16	8.32904	4.5991	6.44257	TetK27_peak_525	1700019D03Rik	ENSMUST00000191441.1	-	52925183	53020180	5' UTR Exon	2507	-92219	0.002863	1.000000	CCDS14949.1	ENSMUSG00000043629.12	1700019D03Rik	protein_coding	OTTMUSG00000021472.1	OTTMUST00000121580.1	2	---	ENSMUSP00000139750.1	1700019D03Rik-207	3	protein_coding
TetK27	chr1	53017887	53018202	315	53018037	17	7.96295	4.25508	6.09287	TetK27_peak_526	1700019D03Rik	ENSMUST00000191441.1	-	52925183	53020180	5' UTR Exon	1978	-92704	0.003326	1.000000	CCDS14949.1	ENSMUSG00000043629.12	1700019D03Rik	protein_coding	OTTMUSG00000021472.1	OTTMUST00000121580.1	2	---	ENSMUSP00000139750.1	1700019D03Rik-207	3	protein_coding
TetK27	chr1	53023660	53024365	705	53024097	17	9.15743	4.86964	7.25158	TetK27_peak_527	.	.	.	.	.	Intergenic	.	.	.	.	.	.	.	.	.	.	.	.	.	.	.	.
TetK27	chr1	53031635	53032410	775	53032005	20	11.7766	5.68125	9.81736	TetK27_peak_528	.	.	.	.	.	Intergenic	.	.	.	.	.	.	.	.	.	.	.	.	.	.	.	.
TetK27	chr1	53037378	53038919	1541	53038462	18	10.0089	5.14017	8.08393	TetK27_peak_529	.	.	.	.	.	Intergenic	.	.	.	.	.	.	.	.	.	.	.	.	.	.	.	.
TetK27	chr1	53038970	53040447	1477	53039293	30	21.6938	8.3866	19.5925	TetK27_peak_530	.	.	.	.	.	Intergenic	.	.	.	.	.	.	.	.	.	.	.	.	.	.	.	.
TetK27	chr1	53046755	53047180	425	53046962	21	12.6908	5.95178	10.7156	TetK27_peak_531	.	.	.	.	.	Intergenic	.	.	.	.	.	.	.	.	.	.	.	.	.	.	.	.
TetK27	chr1	53047449	53051896	4447	53050082	142	187.147	38.6866	184.028	TetK27_peak_532	.	.	.	.	.	Intergenic	.	.	.	.	.	.	.	.	.	.	.	.	.	.	.	.
TetK27	chr1	53052078	53054621	2543	53053629	68	64.4785	16.3112	62.0293	TetK27_peak_533	.	.	.	.	.	Intergenic	.	.	.	.	.	.	.	.	.	.	.	.	.	.	.	.
TetK27	chr1	53054777	53055338	561	53055119	17	7.96295	4.25508	6.09287	TetK27_peak_534	.	.	.	.	.	Intergenic	.	.	.	.	.	.	.	.	.	.	.	.	.	.	.	.
TetK27	chr1	53264474	53265497	1023	53265000	38	30.6499	10.5509	28.4563	TetK27_peak_535	Pms1	ENSMUST00000142922.1	-	53262895	53296968	CDS Exon 5	31471	-1579	0.030052	1.000000	---	ENSMUSG00000026098.13	Pms1	protein_coding	OTTMUSG00000021891.1	OTTMUST00000052022.1	2	---	---	Pms1-207	1	processed_transcript
TetK27	chr1	53296530	53297805	1275	53297263	176	247.285	47.8039	243.824	TetK27_peak_536	Pms1	ENSMUST00000128337.7	-	53267863	53296976	TSS	0	-28667	0.015353	0.350313	---	ENSMUSG00000026098.13	Pms1	protein_coding	OTTMUSG00000021891.1	OTTMUST00000052025.1	2	---	ENSMUSP00000115352.1	Pms1-204	3	protein_coding
TetK27	chr1	53312645	53314447	1802	53313778	147	195.815	40.0393	192.649	TetK27_peak_537	Osgepl1	ENSMUST00000135786.7	+	53313657	53316633	TSS	0	-2186	0.265704	0.438713	---	ENSMUSG00000026096.14	Osgepl1	protein_coding	OTTMUSG00000021889.1	OTTMUST00000051982.1	2	---	---	Osgepl1-204	3	processed_transcript
TetK27	chr1	53351895	53352857	962	53352487	168	208.883	35.4401	205.646	TetK27_peak_538	Gm28551	ENSMUST00000144660.2	-	53325507	53352668	TSS	0	-26388	0.028496	0.803738	---	ENSMUSG00000099913.1	Gm28551	protein_coding	OTTMUSG00000021618.1	OTTMUST00000052030.1	2	---	ENSMUSP00000139404.1	Gm28551-201	1	nonsense_mediated_decay
TetK27	chr1	53463413	53463664	251	53463611	13	5.99569	3.7875	4.17465	TetK27_peak_539	Dnah7a	ENSMUST00000094964.6	-	53397006	53706762	Intron 50	243098	-66407	0.000814	1.000000	CCDS56629.1	ENSMUSG00000096141.2	Dnah7a	protein_coding	OTTMUSG00000046899.1	OTTMUST00000121596.1	2	---	ENSMUSP00000092571.5	Dnah7a-201	5	protein_coding
TetK27	chr1	53466058	53466862	804	53466540	18	10.0089	5.14017	8.08393	TetK27_peak_540	Dnah7a	ENSMUST00000094964.6	-	53397006	53706762	Intron 50	239900	-69052	0.002599	1.000000	CCDS56629.1	ENSMUSG00000096141.2	Dnah7a	protein_coding	OTTMUSG00000046899.1	OTTMUST00000121596.1	2	---	ENSMUSP00000092571.5	Dnah7a-201	5	protein_coding
TetK27	chr1	53472429	53473124	695	53472622	23	14.5757	6.49285	12.5699	TetK27_peak_541	Dnah7a	ENSMUST00000094964.6	-	53397006	53706762	CDS Exon 49	233638	-75423	0.002247	1.000000	CCDS56629.1	ENSMUSG00000096141.2	Dnah7a	protein_coding	OTTMUSG00000046899.1	OTTMUST00000121596.1	2	---	ENSMUSP00000092571.5	Dnah7a-201	5	protein_coding
TetK27	chr1	53706467	53707031	564	53706679	50	41.5118	12.0194	39.2306	TetK27_peak_542	Dnah7a	ENSMUST00000094964.6	-	53397006	53706762	TSS	0	-309461	0.000956	0.523894	CCDS56629.1	ENSMUSG00000096141.2	Dnah7a	protein_coding	OTTMUSG00000046899.1	OTTMUST00000121596.1	2	---	ENSMUSP00000092571.5	Dnah7a-201	5	protein_coding
TetK27	chr1	53754522	53754794	272	53754757	12	5.2738	3.51696	3.47795	TetK27_peak_543	.	.	.	.	.	Intergenic	.	.	.	.	.	.	.	.	.	.	.	.	.	.	.	.
TetK27	chr1	53761412	53762410	998	53761848	22	13.6241	6.22232	11.6331	TetK27_peak_544	Stk17b	ENSMUST00000185920.1	-	53761149	53785158	TTS	22748	-263	0.041608	1.000000	---	ENSMUSG00000026094.14	Stk17b	protein_coding	OTTMUSG00000021434.1	OTTMUST00000121599.1	2	---	ENSMUSP00000139880.1	Stk17b-202	5	protein_coding
TetK27	chr1	53763458	53763787	329	53763572	16	8.32904	4.5991	6.44257	TetK27_peak_545	Stk17b	ENSMUST00000187066.1	-	53760573	53762694	TSS	-764	-2885	0.000000	0.000000	---	ENSMUSG00000026094.14	Stk17b	protein_coding	OTTMUSG00000021434.1	OTTMUST00000121598.1	2	---	---	Stk17b-203		retained_intron
TetK27	chr1	53764272	53766432	2160	53765601	32	23.8582	8.92767	21.733	TetK27_peak_546	Stk17b	ENSMUST00000185920.1	-	53761149	53785158	CDS Exon 3	18726	-3123	0.090004	1.000000	---	ENSMUSG00000026094.14	Stk17b	protein_coding	OTTMUSG00000021434.1	OTTMUST00000121599.1	2	---	ENSMUSP00000139880.1	Stk17b-202	5	protein_coding
TetK27	chr1	53766543	53767309	766	53766721	25	16.5309	7.03392	14.4964	TetK27_peak_547	Stk17b	ENSMUST00000185920.1	-	53761149	53785158	5' UTR Exon	17849	-5394	0.031945	1.000000	---	ENSMUSG00000026094.14	Stk17b	protein_coding	OTTMUSG00000021434.1	OTTMUST00000121599.1	2	---	ENSMUSP00000139880.1	Stk17b-202	5	protein_coding
TetK27	chr1	53768402	53768827	425	53768531	24	15.5448	6.76339	13.5242	TetK27_peak_548	Stk17b	ENSMUST00000185920.1	-	53761149	53785158	5' UTR Exon	16331	-7253	0.017743	1.000000	---	ENSMUSG00000026094.14	Stk17b	protein_coding	OTTMUSG00000021434.1	OTTMUST00000121599.1	2	---	ENSMUSP00000139880.1	Stk17b-202	5	protein_coding
TetK27	chr1	53768941	53769523	582	53769150	21	12.6908	5.95178	10.7156	TetK27_peak_549	Stk17b	ENSMUST00000185920.1	-	53761149	53785158	5' UTR Exon	15635	-7792	0.024282	1.000000	---	ENSMUSG00000026094.14	Stk17b	protein_coding	OTTMUSG00000021434.1	OTTMUST00000121599.1	2	---	ENSMUSP00000139880.1	Stk17b-202	5	protein_coding
TetK27	chr1	53769952	53770849	897	53770592	38	30.6499	10.5509	28.4563	TetK27_peak_550	Stk17b	ENSMUST00000185920.1	-	53761149	53785158	5' UTR Exon	14309	-8803	0.037401	1.000000	---	ENSMUSG00000026094.14	Stk17b	protein_coding	OTTMUSG00000021434.1	OTTMUST00000121599.1	2	---	ENSMUSP00000139880.1	Stk17b-202	5	protein_coding
TetK27	chr1	53771326	53772032	706	53771702	35	27.2007	9.73928	25.0412	TetK27_peak_551	Stk17b	ENSMUST00000027263.13	-	53755506	53785225	CDS Exon 3	13193	-15820	0.023789	1.000000	CCDS14955.1	ENSMUSG00000026094.14	Stk17b	protein_coding	OTTMUSG00000021434.1	OTTMUST00000050819.1	2	---	ENSMUSP00000027263.7	Stk17b-201	1	protein_coding
TetK27	chr1	53772156	53778795	6639	53773608	73	76.7969	20.0196	74.2689	TetK27_peak_552	Stk17b	ENSMUST00000027263.13	-	53755506	53785225	CDS Exon 2	6430	-16650	0.223419	1.000000	CCDS14955.1	ENSMUSG00000026094.14	Stk17b	protein_coding	OTTMUSG00000021434.1	OTTMUST00000050819.1	2	---	ENSMUSP00000027263.7	Stk17b-201	1	protein_coding
TetK27	chr1	53779663	53779971	308	53779815	14	6.74667	4.05803	4.90229	TetK27_peak_553	Stk17b	ENSMUST00000185920.1	-	53761149	53785158	5' UTR Exon	5187	-18514	0.012870	1.000000	---	ENSMUSG00000026094.14	Stk17b	protein_coding	OTTMUSG00000021434.1	OTTMUST00000121599.1	2	---	ENSMUSP00000139880.1	Stk17b-202	5	protein_coding
TetK27	chr1	53780493	53780890	397	53780685	13	5.99569	3.7875	4.17465	TetK27_peak_554	Stk17b	ENSMUST00000185920.1	-	53761149	53785158	5' UTR Exon	4268	-19344	0.016576	1.000000	---	ENSMUSG00000026094.14	Stk17b	protein_coding	OTTMUSG00000021434.1	OTTMUST00000121599.1	2	---	ENSMUSP00000139880.1	Stk17b-202	5	protein_coding
TetK27	chr1	53781150	53782758	1608	53781513	49	44.0915	13.5268	41.7838	TetK27_peak_555	Stk17b	ENSMUST00000185920.1	-	53761149	53785158	5' UTR Exon	2400	-20001	0.067014	1.000000	---	ENSMUSG00000026094.14	Stk17b	protein_coding	OTTMUSG00000021434.1	OTTMUST00000121599.1	2	---	ENSMUSP00000139880.1	Stk17b-202	5	protein_coding
TetK27	chr1	53782950	53783345	395	53783126	27	18.5511	7.57499	16.4886	TetK27_peak_556	Stk17b	ENSMUST00000185920.1	-	53761149	53785158	5' UTR Exon	1813	-21801	0.016493	1.000000	---	ENSMUSG00000026094.14	Stk17b	protein_coding	OTTMUSG00000021434.1	OTTMUST00000121599.1	2	---	ENSMUSP00000139880.1	Stk17b-202	5	protein_coding
TetK27	chr1	53783541	53785286	1745	53784915	293	451.328	69.4997	445.947	TetK27_peak_557	Stk17b	ENSMUST00000027263.13	-	53755506	53785225	TSS	0	-28035	0.056696	0.965063	CCDS14955.1	ENSMUSG00000026094.14	Stk17b	protein_coding	OTTMUSG00000021434.1	OTTMUST00000050819.1	2	---	ENSMUSP00000027263.7	Stk17b-201	1	protein_coding
TetK27	chr1	53790725	53793006	2281	53792090	51	46.6545	14.0678	44.327	TetK27_peak_558	Gm37863	ENSMUST00000194911.1	+	53791201	53792658	TSS	0	0	1.000000	0.638913	---	ENSMUSG00000102405.1	Gm37863	TEC	OTTMUSG00000046900.1	OTTMUST00000121600.1	2	---	---	Gm37863-201		TEC
TetK27	chr1	53795219	53798375	3156	53797688	76	81.1476	20.8312	78.593	TetK27_peak_559	.	.	.	.	.	Intergenic	.	.	.	.	.	.	.	.	.	.	.	.	.	.	.	.
TetK27	chr1	53823332	53825712	2380	53823800	63	57.8932	15.1292	55.4883	TetK27_peak_560	Hecw2	ENSMUST00000120904.7	-	53806876	54194049	Intron 28	368337	-16456	0.006150	1.000000	CCDS14956.1	ENSMUSG00000042807.15	Hecw2	protein_coding	OTTMUSG00000029246.1	OTTMUST00000072479.1	2	---	ENSMUSP00000113283.1	Hecw2-203	5	protein_coding
TetK27	chr1	53837802	53839423	1621	53838327	38	30.6499	10.5509	28.4563	TetK27_peak_561	Hecw2	ENSMUST00000152870.1	-	53839017	53866513	TTS	27090	0	0.014802	0.250925	---	ENSMUSG00000042807.15	Hecw2	protein_coding	OTTMUSG00000029246.1	OTTMUST00000072493.1	2	---	---	Hecw2-206	2	processed_transcript
TetK27	chr1	53843914	53845640	1726	53844976	103	122.371	28.1357	119.59	TetK27_peak_562	Hecw2	ENSMUST00000152870.1	-	53839017	53866513	Intron 4	20873	-4897	0.062807	1.000000	---	ENSMUSG00000042807.15	Hecw2	protein_coding	OTTMUSG00000029246.1	OTTMUST00000072493.1	2	---	---	Hecw2-206	2	processed_transcript
TetK27	chr1	53845779	53846981	1202	53846084	45	30.3975	8.66783	28.2112	TetK27_peak_563	Hecw2	ENSMUST00000152870.1	-	53839017	53866513	Intron 4	19532	-6762	0.043750	1.000000	---	ENSMUSG00000042807.15	Hecw2	protein_coding	OTTMUSG00000029246.1	OTTMUST00000072493.1	2	---	---	Hecw2-206	2	processed_transcript
TetK27	chr1	53850200	53852825	2625	53851074	85	94.4946	23.266	91.8643	TetK27_peak_564	Hecw2	ENSMUST00000152870.1	-	53839017	53866513	CDS Exon 4	13688	-11183	0.095501	1.000000	---	ENSMUSG00000042807.15	Hecw2	protein_coding	OTTMUSG00000029246.1	OTTMUST00000072493.1	2	---	---	Hecw2-206	2	processed_transcript
TetK27	chr1	54250559	54251321	762	54250941	35	24.5444	8.48425	22.4169	TetK27_peak_565	Ccdc150	ENSMUST00000027128.10	+	54250683	54368728	TSS	0	-117407	0.005413	0.837484	CCDS35564.1	ENSMUSG00000025983.11	Ccdc150	protein_coding	OTTMUSG00000034794.1	OTTMUST00000088448.1	2	---	ENSMUSP00000027128.4	Ccdc150-201	1	protein_coding
TetK27	chr1	54279677	54279928	251	54279847	11	4.58302	3.24643	2.81413	TetK27_peak_566	Ccdc150	ENSMUST00000027128.10	+	54250683	54368728	Intron 7	28994	-88800	0.002135	1.000000	CCDS35564.1	ENSMUSG00000025983.11	Ccdc150	protein_coding	OTTMUSG00000034794.1	OTTMUST00000088448.1	2	---	ENSMUSP00000027128.4	Ccdc150-201	1	protein_coding
TetK27	chr1	54421797	54422751	954	54422012	23	14.5757	6.49285	12.5699	TetK27_peak_567	Gtf3c3	ENSMUST00000041638.7	-	54396004	54438972	Intron 8	16221	-25793	0.022225	1.000000	CCDS14958.1	ENSMUSG00000041303.7	Gtf3c3	protein_coding	OTTMUSG00000046944.1	OTTMUST00000121670.1	2	---	ENSMUSP00000039420.6	Gtf3c3-201	1	protein_coding
TetK27	chr1	54422845	54423112	267	54423052	12	5.2738	3.51696	3.47795	TetK27_peak_568	Gtf3c3	ENSMUST00000041638.7	-	54396004	54438972	Intron 8	15860	-26841	0.006237	1.000000	CCDS14958.1	ENSMUSG00000041303.7	Gtf3c3	protein_coding	OTTMUSG00000046944.1	OTTMUST00000121670.1	2	---	ENSMUSP00000039420.6	Gtf3c3-201	1	protein_coding
TetK27	chr1	54438333	54439408	1075	54438822	86	78.9995	16.3935	76.461	TetK27_peak_569	Gtf3c3	ENSMUST00000041638.7	-	54396004	54438972	TSS	0	-42329	0.014894	0.594796	CCDS14958.1	ENSMUSG00000041303.7	Gtf3c3	protein_coding	OTTMUSG00000046944.1	OTTMUST00000121670.1	2	---	ENSMUSP00000039420.6	Gtf3c3-201	1	protein_coding
TetK27	chr1	54491925	54494330	2405	54492839	60	41.4082	9.55555	39.1271	TetK27_peak_570	Pgap1	ENSMUST00000097739.4	-	54472994	54557683	CDS Exon 23	63353	-18931	0.028409	1.000000	CCDS48260.1	ENSMUSG00000073678.4	Pgap1	protein_coding	OTTMUSG00000046957.1	OTTMUST00000121692.1	2	---	ENSMUSP00000095346.3	Pgap1-201	5	protein_coding
TetK27	chr1	54520156	54520598	442	54520392	22	13.6241	6.22232	11.6331	TetK27_peak_571	Gm36955	ENSMUST00000194316.1	-	54518610	54520271	TSS	0	-1546	0.069795	0.261851	---	ENSMUSG00000104136.1	Gm36955	TEC	OTTMUSG00000046958.1	OTTMUST00000121696.1	2	---	---	Gm36955-201		TEC
TetK27	chr1	54556737	54558336	1599	54557417	138	160.519	29.149	157.538	TetK27_peak_572	Pgap1	ENSMUST00000185817.1	-	54524284	54557685	TSS	0	-32453	0.028411	0.593125	---	ENSMUSG00000073678.4	Pgap1	protein_coding	OTTMUSG00000046957.1	OTTMUST00000121693.1	2	---	---	Pgap1-202	1	retained_intron
TetK27	chr1	54584435	54586604	2169	54585272	97	112.917	26.5125	110.187	TetK27_peak_573	.	.	.	.	.	Intergenic	.	.	.	.	.	.	.	.	.	.	.	.	.	.	.	.
TetK27	chr1	54684252	54685130	878	54684648	20	11.7766	5.68125	9.81736	TetK27_peak_574	Ankrd44	ENSMUST00000044359.15	-	54645342	54926388	Intron 16	241258	-38910	0.003128	1.000000	---	ENSMUSG00000052331.14	Ankrd44	protein_coding	OTTMUSG00000042322.1	---	3	---	ENSMUSP00000040327.9	Ankrd44-201	5	protein_coding
TetK27	chr1	54747689	54748520	831	54747909	20	11.7766	5.68125	9.81736	TetK27_peak_575	Ankrd44	ENSMUST00000044359.15	-	54645342	54926388	Intron 9	177868	-102347	0.002960	1.000000	---	ENSMUSG00000052331.14	Ankrd44	protein_coding	OTTMUSG00000042322.1	---	3	---	ENSMUSP00000040327.9	Ankrd44-201	5	protein_coding
TetK27	chr1	54814253	54816091	1838	54815025	54	50.5604	14.8795	48.2044	TetK27_peak_576	Ankrd44	ENSMUST00000178905.1	-	54762368	54813444	TSS	-809	-51885	0.000000	0.000000	---	ENSMUSG00000052331.14	Ankrd44	protein_coding	OTTMUSG00000042322.1	OTTMUST00000111398.1	2	---	---	Ankrd44-208	2	processed_transcript
TetK27	chr1	54816636	54817492	856	54817004	20	11.7766	5.68125	9.81736	TetK27_peak_577	Ankrd44	ENSMUST00000044359.15	-	54645342	54926388	Intron 2	108896	-171294	0.003049	1.000000	---	ENSMUSG00000052331.14	Ankrd44	protein_coding	OTTMUSG00000042322.1	---	3	---	ENSMUSP00000040327.9	Ankrd44-201	5	protein_coding
TetK27	chr1	54817990	54818268	278	54818153	12	5.2738	3.51696	3.47795	TetK27_peak_578	Ankrd44	ENSMUST00000044359.15	-	54645342	54926388	Intron 2	108120	-172648	0.000993	1.000000	---	ENSMUSG00000052331.14	Ankrd44	protein_coding	OTTMUSG00000042322.1	---	3	---	ENSMUSP00000040327.9	Ankrd44-201	5	protein_coding
TetK27	chr1	54821714	54822118	404	54821899	16	8.32904	4.5991	6.44257	TetK27_peak_579	Ankrd44	ENSMUST00000044359.15	-	54645342	54926388	Intron 2	104270	-176372	0.001441	1.000000	---	ENSMUSG00000052331.14	Ankrd44	protein_coding	OTTMUSG00000042322.1	---	3	---	ENSMUSP00000040327.9	Ankrd44-201	5	protein_coding
TetK27	chr1	54822648	54823154	506	54822960	28	19.5842	7.84553	17.5081	TetK27_peak_580	Ankrd44	ENSMUST00000044359.15	-	54645342	54926388	Intron 2	103234	-177306	0.001804	1.000000	---	ENSMUSG00000052331.14	Ankrd44	protein_coding	OTTMUSG00000042322.1	---	3	---	ENSMUSP00000040327.9	Ankrd44-201	5	protein_coding
TetK27	chr1	54823567	54823867	300	54823610	13	5.11059	3.30951	3.33512	TetK27_peak_581	Ankrd44	ENSMUST00000044359.15	-	54645342	54926388	Intron 2	102521	-178225	0.001071	1.000000	---	ENSMUSG00000052331.14	Ankrd44	protein_coding	OTTMUSG00000042322.1	---	3	---	ENSMUSP00000040327.9	Ankrd44-201	5	protein_coding
TetK27	chr1	54825818	54826171	353	54825954	12	5.2738	3.51696	3.47795	TetK27_peak_582	Ankrd44	ENSMUST00000044359.15	-	54645342	54926388	Intron 2	100217	-180476	0.001260	1.000000	---	ENSMUSG00000052331.14	Ankrd44	protein_coding	OTTMUSG00000042322.1	---	3	---	ENSMUSP00000040327.9	Ankrd44-201	5	protein_coding
TetK27	chr1	54826698	54827163	465	54826946	23	12.9142	5.67344	10.9367	TetK27_peak_583	Ankrd44	ENSMUST00000044359.15	-	54645342	54926388	Intron 2	99225	-181356	0.001658	1.000000	---	ENSMUSG00000052331.14	Ankrd44	protein_coding	OTTMUSG00000042322.1	---	3	---	ENSMUSP00000040327.9	Ankrd44-201	5	protein_coding
TetK27	chr1	54827410	54829075	1665	54827638	34	24.7067	8.8097	22.5779	TetK27_peak_584	Ankrd44	ENSMUST00000044359.15	-	54645342	54926388	CDS Exon 2	97313	-182068	0.005928	1.000000	---	ENSMUSG00000052331.14	Ankrd44	protein_coding	OTTMUSG00000042322.1	---	3	---	ENSMUSP00000040327.9	Ankrd44-201	5	protein_coding
TetK27	chr1	54833992	54834313	321	54834098	14	6.74667	4.05803	4.90229	TetK27_peak_585	Ankrd44	ENSMUST00000177679.1	-	54766792	54884712	5' UTR Exon	50399	-67200	0.002731	1.000000	---	ENSMUSG00000052331.14	Ankrd44	protein_coding	OTTMUSG00000042322.1	OTTMUST00000111399.1	2	---	ENSMUSP00000137216.1	Ankrd44-202	2	protein_coding
TetK27	chr1	54835711	54836665	954	54836222	17	9.15743	4.86964	7.25158	TetK27_peak_586	Ankrd44	ENSMUST00000177679.1	-	54766792	54884712	5' UTR Exon	48047	-68919	0.008099	1.000000	---	ENSMUSG00000052331.14	Ankrd44	protein_coding	OTTMUSG00000042322.1	OTTMUST00000111399.1	2	---	ENSMUSP00000137216.1	Ankrd44-202	2	protein_coding
TetK27	chr1	54839529	54843148	3619	54841773	52	47.9484	14.3384	45.6112	TetK27_peak_587	Ankrd44	ENSMUST00000177679.1	-	54766792	54884712	5' UTR Exon	41564	-72737	0.030699	1.000000	---	ENSMUSG00000052331.14	Ankrd44	protein_coding	OTTMUSG00000042322.1	OTTMUST00000111399.1	2	---	ENSMUSP00000137216.1	Ankrd44-202	2	protein_coding
TetK27	chr1	54844406	54845153	747	54844568	17	9.15743	4.86964	7.25158	TetK27_peak_588	Ankrd44	ENSMUST00000177679.1	-	54766792	54884712	5' UTR Exon	39559	-77614	0.006343	1.000000	---	ENSMUSG00000052331.14	Ankrd44	protein_coding	OTTMUSG00000042322.1	OTTMUST00000111399.1	2	---	ENSMUSP00000137216.1	Ankrd44-202	2	protein_coding
TetK27	chr1	54846215	54847492	1277	54847207	23	9.35657	4.10583	7.44908	TetK27_peak_589	Ankrd44	ENSMUST00000177679.1	-	54766792	54884712	5' UTR Exon	37220	-79423	0.010838	1.000000	---	ENSMUSG00000052331.14	Ankrd44	protein_coding	OTTMUSG00000042322.1	OTTMUST00000111399.1	2	---	ENSMUSP00000137216.1	Ankrd44-202	2	protein_coding
TetK27	chr1	54853609	54854390	781	54854143	17	9.15743	4.86964	7.25158	TetK27_peak_590	Ankrd44	ENSMUST00000177679.1	-	54766792	54884712	5' UTR Exon	30322	-86817	0.006632	1.000000	---	ENSMUSG00000052331.14	Ankrd44	protein_coding	OTTMUSG00000042322.1	OTTMUST00000111399.1	2	---	ENSMUSP00000137216.1	Ankrd44-202	2	protein_coding
TetK27	chr1	54862473	54862724	251	54862634	13	3.28618	2.39507	1.59967	TetK27_peak_591	Ankrd44	ENSMUST00000177679.1	-	54766792	54884712	5' UTR Exon	21988	-95681	0.002137	1.000000	---	ENSMUSG00000052331.14	Ankrd44	protein_coding	OTTMUSG00000042322.1	OTTMUST00000111399.1	2	---	ENSMUSP00000137216.1	Ankrd44-202	2	protein_coding
TetK27	chr1	54865391	54865642	251	54865521	15	7.52498	4.32857	5.65872	TetK27_peak_592	Ankrd44	ENSMUST00000177679.1	-	54766792	54884712	5' UTR Exon	19070	-98599	0.002137	1.000000	---	ENSMUSG00000052331.14	Ankrd44	protein_coding	OTTMUSG00000042322.1	OTTMUST00000111399.1	2	---	ENSMUSP00000137216.1	Ankrd44-202	2	protein_coding
TetK27	chr1	54866122	54866581	459	54866253	21	8.88034	4.14548	6.98899	TetK27_peak_593	Ankrd44	ENSMUST00000177679.1	-	54766792	54884712	5' UTR Exon	18131	-99330	0.003901	1.000000	---	ENSMUSG00000052331.14	Ankrd44	protein_coding	OTTMUSG00000042322.1	OTTMUST00000111399.1	2	---	ENSMUSP00000137216.1	Ankrd44-202	2	protein_coding
TetK27	chr1	54866860	54867898	1038	54867597	15	7.52498	4.32857	5.65872	TetK27_peak_594	Ankrd44	ENSMUST00000177679.1	-	54766792	54884712	5' UTR Exon	16814	-100068	0.008811	1.000000	---	ENSMUSG00000052331.14	Ankrd44	protein_coding	OTTMUSG00000042322.1	OTTMUST00000111399.1	2	---	ENSMUSP00000137216.1	Ankrd44-202	2	protein_coding
TetK27	chr1	54868975	54869226	251	54869154	14	5.78446	3.5459	3.98249	TetK27_peak_595	Ankrd44	ENSMUST00000177679.1	-	54766792	54884712	5' UTR Exon	15486	-102183	0.002137	1.000000	---	ENSMUSG00000052331.14	Ankrd44	protein_coding	OTTMUSG00000042322.1	OTTMUST00000111399.1	2	---	ENSMUSP00000137216.1	Ankrd44-202	2	protein_coding
TetK27	chr1	54869473	54869805	332	54869582	15	7.52498	4.32857	5.65872	TetK27_peak_596	Ankrd44	ENSMUST00000177679.1	-	54766792	54884712	5' UTR Exon	14907	-102681	0.002824	1.000000	---	ENSMUSG00000052331.14	Ankrd44	protein_coding	OTTMUSG00000042322.1	OTTMUST00000111399.1	2	---	ENSMUSP00000137216.1	Ankrd44-202	2	protein_coding
TetK27	chr1	54870166	54873072	2906	54871241	57	54.5367	15.6911	52.153	TetK27_peak_597	Ankrd44	ENSMUST00000177679.1	-	54766792	54884712	5' UTR Exon	11640	-103374	0.024652	1.000000	---	ENSMUSG00000052331.14	Ankrd44	protein_coding	OTTMUSG00000042322.1	OTTMUST00000111399.1	2	---	ENSMUSP00000137216.1	Ankrd44-202	2	protein_coding
TetK27	chr1	54873607	54874067	460	54873972	17	6.15184	3.39176	4.3298	TetK27_peak_598	Ankrd44	ENSMUST00000177679.1	-	54766792	54884712	5' UTR Exon	10645	-106815	0.003909	1.000000	---	ENSMUSG00000052331.14	Ankrd44	protein_coding	OTTMUSG00000042322.1	OTTMUST00000111399.1	2	---	ENSMUSP00000137216.1	Ankrd44-202	2	protein_coding
TetK27	chr1	54881415	54881696	281	54881575	10	3.92564	2.97589	2.18676	TetK27_peak_599	Ankrd44	ENSMUST00000177679.1	-	54766792	54884712	5' UTR Exon	3016	-114623	0.002391	1.000000	---	ENSMUSG00000052331.14	Ankrd44	protein_coding	OTTMUSG00000042322.1	OTTMUST00000111399.1	2	---	ENSMUSP00000137216.1	Ankrd44-202	2	protein_coding
TetK27	chr1	54881987	54883903	1916	54883068	54	50.5077	14.8543	48.1568	TetK27_peak_600	Ankrd44	ENSMUST00000177679.1	-	54766792	54884712	5' UTR Exon	809	-115195	0.016257	1.000000	---	ENSMUSG00000052331.14	Ankrd44	protein_coding	OTTMUSG00000042322.1	OTTMUST00000111399.1	2	---	ENSMUSP00000137216.1	Ankrd44-202	2	protein_coding
TetK27	chr1	54884945	54885239	294	54885133	14	6.74667	4.05803	4.90229	TetK27_peak_601	Ankrd44	ENSMUST00000177679.1	-	54766792	54884712	TSS	-233	-118153	0.000000	0.000000	---	ENSMUSG00000052331.14	Ankrd44	protein_coding	OTTMUSG00000042322.1	OTTMUST00000111399.1	2	---	ENSMUSP00000137216.1	Ankrd44-202	2	protein_coding
TetK27	chr1	54886247	54886581	334	54886367	14	6.74667	4.05803	4.90229	TetK27_peak_602	Ankrd44	ENSMUST00000044359.15	-	54645342	54926388	Intron 1	39807	-240905	0.001192	1.000000	---	ENSMUSG00000052331.14	Ankrd44	protein_coding	OTTMUSG00000042322.1	---	3	---	ENSMUSP00000040327.9	Ankrd44-201	5	protein_coding
TetK27	chr1	54886689	54887089	400	54886876	14	6.74667	4.05803	4.90229	TetK27_peak_603	Ankrd44	ENSMUST00000044359.15	-	54645342	54926388	Intron 1	39299	-241347	0.001427	1.000000	---	ENSMUSG00000052331.14	Ankrd44	protein_coding	OTTMUSG00000042322.1	---	3	---	ENSMUSP00000040327.9	Ankrd44-201	5	protein_coding
TetK27	chr1	54887879	54888159	280	54888133	12	3.26591	2.4496	1.59523	TetK27_peak_604	Ankrd44	ENSMUST00000044359.15	-	54645342	54926388	Intron 1	38229	-242537	0.001000	1.000000	---	ENSMUSG00000052331.14	Ankrd44	protein_coding	OTTMUSG00000042322.1	---	3	---	ENSMUSP00000040327.9	Ankrd44-201	5	protein_coding
TetK27	chr1	54888224	54889947	1723	54889490	44	37.8375	12.1741	35.5808	TetK27_peak_605	Ankrd44	ENSMUST00000044359.15	-	54645342	54926388	Intron 1	36441	-242882	0.006134	1.000000	---	ENSMUSG00000052331.14	Ankrd44	protein_coding	OTTMUSG00000042322.1	---	3	---	ENSMUSP00000040327.9	Ankrd44-201	5	protein_coding
TetK27	chr1	54896068	54898386	2318	54897228	57	54.5367	15.6911	52.153	TetK27_peak_606	Ankrd44	ENSMUST00000044359.15	-	54645342	54926388	Intron 1	28002	-250726	0.008251	1.000000	---	ENSMUSG00000052331.14	Ankrd44	protein_coding	OTTMUSG00000042322.1	---	3	---	ENSMUSP00000040327.9	Ankrd44-201	5	protein_coding
TetK27	chr1	54898668	54898971	303	54898750	13	5.99569	3.7875	4.17465	TetK27_peak_607	Ankrd44	ENSMUST00000044359.15	-	54645342	54926388	Intron 1	27417	-253326	0.001082	1.000000	---	ENSMUSG00000052331.14	Ankrd44	protein_coding	OTTMUSG00000042322.1	---	3	---	ENSMUSP00000040327.9	Ankrd44-201	5	protein_coding
TetK27	chr1	54899060	54899336	276	54899236	16	4.87151	2.90829	3.10108	TetK27_peak_608	Ankrd44	ENSMUST00000044359.15	-	54645342	54926388	Intron 1	27052	-253718	0.000986	1.000000	---	ENSMUSG00000052331.14	Ankrd44	protein_coding	OTTMUSG00000042322.1	---	3	---	ENSMUSP00000040327.9	Ankrd44-201	5	protein_coding
TetK27	chr1	54899671	54900175	504	54899940	13	5.99569	3.7875	4.17465	TetK27_peak_609	Ankrd44	ENSMUST00000044359.15	-	54645342	54926388	Intron 1	26213	-254329	0.001797	1.000000	---	ENSMUSG00000052331.14	Ankrd44	protein_coding	OTTMUSG00000042322.1	---	3	---	ENSMUSP00000040327.9	Ankrd44-201	5	protein_coding
TetK27	chr1	54901177	54902356	1179	54902143	19	9.53241	4.72787	7.62311	TetK27_peak_610	Ankrd44	ENSMUST00000044359.15	-	54645342	54926388	Intron 1	24032	-255835	0.004199	1.000000	---	ENSMUSG00000052331.14	Ankrd44	protein_coding	OTTMUSG00000042322.1	---	3	---	ENSMUSP00000040327.9	Ankrd44-201	5	protein_coding
TetK27	chr1	54904109	54904477	368	54904252	15	7.52498	4.32857	5.65872	TetK27_peak_611	Ankrd44	ENSMUST00000044359.15	-	54645342	54926388	Intron 1	21911	-258767	0.001313	1.000000	---	ENSMUSG00000052331.14	Ankrd44	protein_coding	OTTMUSG00000042322.1	---	3	---	ENSMUSP00000040327.9	Ankrd44-201	5	protein_coding
TetK27	chr1	54905903	54908180	2277	54907245	33	24.9599	9.19821	22.8231	TetK27_peak_612	Ankrd44	ENSMUST00000044359.15	-	54645342	54926388	Intron 1	18208	-260561	0.008105	1.000000	---	ENSMUSG00000052331.14	Ankrd44	protein_coding	OTTMUSG00000042322.1	---	3	---	ENSMUSP00000040327.9	Ankrd44-201	5	protein_coding
TetK27	chr1	54908924	54911374	2450	54909233	30	21.6938	8.3866	19.5925	TetK27_peak_613	Ankrd44	ENSMUST00000044359.15	-	54645342	54926388	Intron 1	15014	-263582	0.008721	1.000000	---	ENSMUSG00000052331.14	Ankrd44	protein_coding	OTTMUSG00000042322.1	---	3	---	ENSMUSP00000040327.9	Ankrd44-201	5	protein_coding
TetK27	chr1	54911425	54916862	5437	54913669	85	94.4946	23.266	91.8643	TetK27_peak_614	A130048G24Rik	ENSMUST00000193052.1	-	54913845	54916595	TSS	0	0	1.000000	0.505885	---	ENSMUSG00000102642.1	A130048G24Rik	TEC	OTTMUSG00000046963.1	OTTMUST00000121703.1	2	---	---	A130048G24Rik-201		TEC
TetK27	chr1	54921823	54926940	5117	54925970	252	306.839	36.5496	302.955	TetK27_peak_615	Ankrd44	ENSMUST00000179030.7	-	54645340	54926388	TSS	0	-276483	0.016246	0.892145	CCDS35566.2	ENSMUSG00000052331.14	Ankrd44	protein_coding	OTTMUSG00000042322.1	OTTMUST00000111387.1	2	---	ENSMUSP00000137616.1	Ankrd44-210	1	protein_coding
TetK27	chr1	54944443	54944996	553	54944845	19	5.97614	3.13297	4.17363	TetK27_peak_616	.	.	.	.	.	Intergenic	.	.	.	.	.	.	.	.	.	.	.	.	.	.	.	.
TetK27	chr1	54945063	54945538	475	54945366	12	4.46559	3.07312	2.71949	TetK27_peak_617	.	.	.	.	.	Intergenic	.	.	.	.	.	.	.	.	.	.	.	.	.	.	.	.
TetK27	chr1	55021270	55021521	251	55021392	16	7.21211	4.01869	5.36317	TetK27_peak_618	Sf3b1	ENSMUST00000187500.6	-	55003151	55027465	Intron 1	5944	-18119	0.010364	1.000000	---	ENSMUSG00000025982.13	Sf3b1	protein_coding	OTTMUSG00000046964.1	OTTMUST00000121707.1	2	---	---	Sf3b1-203	2	retained_intron
TetK27	chr1	55023566	55024657	1091	55023792	22	13.6241	6.22232	11.6331	TetK27_peak_619	Sf3b1	ENSMUST00000187500.6	-	55003151	55027465	Intron 1	2808	-20415	0.044911	1.000000	---	ENSMUSG00000025982.13	Sf3b1	protein_coding	OTTMUSG00000046964.1	OTTMUST00000121707.1	2	---	---	Sf3b1-203	2	retained_intron
TetK27	chr1	55024899	55025569	670	55025348	16	8.32904	4.5991	6.44257	TetK27_peak_620	Sf3b1	ENSMUST00000187500.6	-	55003151	55027465	Intron 1	1896	-21748	0.027596	1.000000	---	ENSMUSG00000025982.13	Sf3b1	protein_coding	OTTMUSG00000046964.1	OTTMUST00000121707.1	2	---	---	Sf3b1-203	2	retained_intron
TetK27	chr1	55025654	55030712	5058	55027155	282	387.151	50.5857	382.527	TetK27_peak_621	Sf3b1	ENSMUST00000027127.13	-	54985169	55027482	TSS	0	-40485	0.043224	0.361534	CCDS35567.1	ENSMUSG00000025982.13	Sf3b1	protein_coding	OTTMUSG00000046964.1	OTTMUST00000121704.1	2	---	ENSMUSP00000027127.7	Sf3b1-201	1	protein_coding
TetK27	chr1	55030998	55031654	656	55031151	21	11.1852	5.20066	9.24014	TetK27_peak_622	.	.	.	.	.	Intergenic	.	.	.	.	.	.	.	.	.	.	.	.	.	.	.	.
TetK27	chr1	55048612	55049479	867	55048837	27	18.5511	7.57499	16.4886	TetK27_peak_623	.	.	.	.	.	Intergenic	.	.	.	.	.	.	.	.	.	.	.	.	.	.	.	.
TetK27	chr1	55049777	55050263	486	55049948	19	10.8823	5.41071	8.93972	TetK27_peak_624	.	.	.	.	.	Intergenic	.	.	.	.	.	.	.	.	.	.	.	.	.	.	.	.
TetK27	chr1	55051390	55051708	318	55051577	14	6.74667	4.05803	4.90229	TetK27_peak_625	E330011M16Rik	ENSMUST00000193614.1	-	55051319	55053113	TTS	1405	-71	0.177716	1.000000	---	ENSMUSG00000103030.1	E330011M16Rik	TEC	OTTMUSG00000046966.1	OTTMUST00000121713.1	2	---	---	E330011M16Rik-201		TEC
TetK27	chr1	55051919	55053696	1777	55053023	311	432.599	53.3757	427.462	TetK27_peak_626	E330011M16Rik	ENSMUST00000193614.1	-	55051319	55053113	TSS	0	-600	0.665738	0.672103	---	ENSMUSG00000103030.1	E330011M16Rik	TEC	OTTMUSG00000046966.1	OTTMUST00000121713.1	2	---	---	E330011M16Rik-201		TEC
TetK27	chr1	55086588	55090348	3760	55087665	239	285.776	34.6716	282.055	TetK27_peak_627	Hspe1	ENSMUST00000134628.1	+	55088314	55089916	TSS	0	0	1.000000	0.426216	---	ENSMUSG00000073676.4	Hspe1	protein_coding	OTTMUSG00000021821.1	OTTMUST00000051786.1	2	---	---	Hspe1-202	2	retained_intron
TetK27	chr1	55130315	55132423	2108	55131456	317	393.628	39.7557	388.937	TetK27_peak_628	Mob4	ENSMUST00000027122.13	+	55131282	55153000	TSS	0	-20577	0.052581	0.541489	---	ENSMUSG00000025979.13	Mob4	protein_coding	OTTMUSG00000034749.1	OTTMUST00000088317.1	2	---	ENSMUSP00000027122.7	Mob4-201	3	protein_coding
TetK27	chr1	55210290	55210548	258	55210404	15	7.52498	4.32857	5.65872	TetK27_peak_629	Rftn2	ENSMUST00000114428.2	-	55201651	55226783	Intron 3	16235	-8639	0.010305	1.000000	---	ENSMUSG00000025978.14	Rftn2	protein_coding	OTTMUSG00000021806.1	OTTMUST00000051759.1	2	---	ENSMUSP00000110071.2	Rftn2-202	1	protein_coding
TetK27	chr1	55214892	55216385	1493	55215521	50	45.3688	13.7973	43.0514	TetK27_peak_630	Rftn2	ENSMUST00000114428.2	-	55201651	55226783	Intron 1	10398	-13241	0.059444	1.000000	---	ENSMUSG00000025978.14	Rftn2	protein_coding	OTTMUSG00000021806.1	OTTMUST00000051759.1	2	---	ENSMUSP00000110071.2	Rftn2-202	1	protein_coding
TetK27	chr1	55236746	55238428	1682	55237372	109	81.8861	12.1204	79.3307	TetK27_peak_631	Mars2	ENSMUST00000061334.9	+	55237177	55248471	TSS	0	-10043	0.110846	0.743910	CCDS14963.1	ENSMUSG00000046994.9	Mars2	protein_coding	OTTMUSG00000046972.1	OTTMUST00000121723.1	2	---	ENSMUSP00000049770.8	Mars2-201		protein_coding
TetK27	chr1	55363201	55363851	650	55363581	83	61.2296	11.2593	58.8057	TetK27_peak_632	Boll	ENSMUST00000159398.1	-	55346257	55363470	TSS	0	-16944	0.015685	0.414747	---	ENSMUSG00000025977.15	Boll	protein_coding	OTTMUSG00000030118.1	OTTMUST00000074609.1	2	---	ENSMUSP00000123814.1	Boll-203	1	protein_coding
TetK27	chr1	55405363	55406896	1533	55406048	98	93.6091	18.1341	90.9851	TetK27_peak_633	Plcl1	ENSMUST00000042986.9	+	55405921	55754286	TSS	0	-347390	0.002802	0.636245	CCDS48263.1	ENSMUSG00000038349.10	Plcl1	protein_coding	OTTMUSG00000046977.1	OTTMUST00000121728.1	2	---	ENSMUSP00000037854.8	Plcl1-201	1	protein_coding
TetK27	chr1	55430467	55430718	251	55430595	11	4.58302	3.24643	2.81413	TetK27_peak_634	Plcl1	ENSMUST00000042986.9	+	55405921	55754286	Intron 1	24546	-323568	0.000723	1.000000	CCDS48263.1	ENSMUSG00000038349.10	Plcl1	protein_coding	OTTMUSG00000046977.1	OTTMUST00000121728.1	2	---	ENSMUSP00000037854.8	Plcl1-201	1	protein_coding
TetK27	chr1	56972827	56973235	408	56973046	14	5.76364	3.5351	3.9636	TetK27_peak_635	Satb2	ENSMUST00000042857.13	-	56793981	56972503	TSS	-324	-178846	0.000000	0.000000	---	ENSMUSG00000038331.15	Satb2	protein_coding	OTTMUSG00000023028.1	OTTMUST00000055483.1	2	---	ENSMUSP00000046067.7	Satb2-201	1	protein_coding
TetK27	chr1	57377100	57378545	1445	57377726	184	193.507	24.7974	190.355	TetK27_peak_636	1700066M21Rik	ENSMUST00000187255.1	+	57377640	57380079	TSS	0	-1534	0.371311	0.626556	---	ENSMUSG00000038323.3	1700066M21Rik	protein_coding	OTTMUSG00000047047.1	OTTMUST00000121827.1	2	---	---	1700066M21Rik-203	3	processed_transcript
TetK27	chr1	57405727	57407383	1656	57406632	166	187.819	28.5697	184.697	TetK27_peak_637	Tyw5	ENSMUST00000162686.7	-	57388237	57407102	TSS	0	-17490	0.072935	0.830416	CCDS14966.2	ENSMUSG00000048495.16	Tyw5	protein_coding	OTTMUSG00000029759.1	OTTMUST00000073912.1	2	---	ENSMUSP00000125427.1	Tyw5-209	1	protein_coding
TetK27	chr1	57969315	57970473	1158	57969904	201	293.653	54.6482	289.873	TetK27_peak_638	Kctd18	ENSMUST00000161608.7	-	57955253	57969525	TSS	0	-14062	0.014783	0.182053	---	ENSMUSG00000054770.16	Kctd18	protein_coding	OTTMUSG00000035129.1	OTTMUST00000089406.1	2	---	ENSMUSP00000125153.1	Kctd18-206	1	nonsense_mediated_decay
TetK27	chr1	57995560	57996633	1073	57996122	94	108.249	25.7009	105.543	TetK27_peak_639	Sgo2a	ENSMUST00000027202.8	+	57995971	58025900	TSS	0	-29267	0.022152	0.617318	CCDS35574.1	ENSMUSG00000026039.9	Sgo2a	protein_coding	OTTMUSG00000021832.1	OTTMUST00000051809.1	2	---	ENSMUSP00000027202.8	Sgo2a-201	1	protein_coding
TetK27	chr1	58391878	58392441	563	58392267	33	24.9599	9.19821	22.8231	TetK27_peak_640	Bzw1	ENSMUST00000188898.6	+	58393124	58403005	TSS	-683	-10564	0.000000	0.000000	---	ENSMUSG00000051223.14	Bzw1	protein_coding	OTTMUSG00000047207.1	OTTMUST00000122061.1	2	---	ENSMUSP00000139761.1	Bzw1-204	5	protein_coding
TetK27	chr1	58392793	58394392	1599	58393305	321	423.167	46.5177	418.143	TetK27_peak_641	Bzw1	ENSMUST00000186949.1	+	58393470	58405132	TSS	0	-10740	0.079139	0.576875	---	ENSMUSG00000051223.14	Bzw1	protein_coding	OTTMUSG00000047207.1	OTTMUST00000122063.1	2	---	ENSMUSP00000140319.1	Bzw1-202	5	protein_coding
TetK27	chr1	58396089	58396356	267	58396141	14	6.74667	4.05803	4.90229	TetK27_peak_642	Bzw1	ENSMUST00000186949.1	+	58393470	58405132	Intron 2	2619	-8776	0.022979	1.000000	---	ENSMUSG00000051223.14	Bzw1	protein_coding	OTTMUSG00000047207.1	OTTMUST00000122063.1	2	---	ENSMUSP00000140319.1	Bzw1-202	5	protein_coding
TetK27	chr1	58409207	58409575	368	58409432	14	6.74667	4.05803	4.90229	TetK27_peak_643	.	.	.	.	.	Intergenic	.	.	.	.	.	.	.	.	.	.	.	.	.	.	.	.
TetK27	chr1	58416096	58416790	694	58416340	15	7.52498	4.32857	5.65872	TetK27_peak_644	Clk1	ENSMUST00000123580.7	-	58412000	58416766	TSS	0	-4096	0.140759	0.965468	---	ENSMUSG00000026034.17	Clk1	protein_coding	OTTMUSG00000021803.1	OTTMUST00000051748.1	2	---	---	Clk1-202	5	retained_intron
TetK27	chr1	58417014	58417309	295	58417125	10	3.92564	2.97589	2.18676	TetK27_peak_645	Clk1	ENSMUST00000123580.7	-	58412000	58416766	TSS	-248	-5014	0.000000	0.000000	---	ENSMUSG00000026034.17	Clk1	protein_coding	OTTMUSG00000021803.1	OTTMUST00000051748.1	2	---	---	Clk1-202	5	retained_intron
TetK27	chr1	58417412	58417707	295	58417632	11	4.58302	3.24643	2.81413	TetK27_peak_646	Clk1	ENSMUST00000123580.7	-	58412000	58416766	TSS	-646	-5412	0.000000	0.000000	---	ENSMUSG00000026034.17	Clk1	protein_coding	OTTMUSG00000021803.1	OTTMUST00000051748.1	2	---	---	Clk1-202	5	retained_intron
TetK27	chr1	58418060	58418849	789	58418511	21	11.1852	5.20066	9.24014	TetK27_peak_647	Clk1	ENSMUST00000131051.1	-	58416910	58417427	TSS	-633	-1150	0.000000	0.000000	---	ENSMUSG00000026034.17	Clk1	protein_coding	OTTMUSG00000021803.1	OTTMUST00000057902.1	2	---	---	Clk1-205	2	retained_intron
TetK27	chr1	58418955	58419271	316	58419123	15	6.95842	4.02729	5.11285	TetK27_peak_648	Clk1	ENSMUST00000151338.7	-	58412000	58424067	3' UTR Exon	4796	-6955	0.026268	1.000000	---	ENSMUSG00000026034.17	Clk1	protein_coding	OTTMUSG00000021803.1	OTTMUST00000051747.1	2	---	ENSMUSP00000137815.1	Clk1-211	5	nonsense_mediated_decay
TetK27	chr1	58419416	58419667	251	58419497	17	7.96295	4.25508	6.09287	TetK27_peak_649	Clk1	ENSMUST00000186552.6	-	58414590	58420399	CDS Exon 2	732	-4826	0.043373	1.000000	---	ENSMUSG00000026034.17	Clk1	protein_coding	OTTMUSG00000021803.1	OTTMUST00000122064.1	2	---	---	Clk1-213	3	retained_intron
TetK27	chr1	58420052	58420487	435	58420248	17	9.15743	4.86964	7.25158	TetK27_peak_650	Clk1	ENSMUST00000186552.6	-	58414590	58420399	TSS	0	-5462	0.059897	0.798165	---	ENSMUSG00000026034.17	Clk1	protein_coding	OTTMUSG00000021803.1	OTTMUST00000122064.1	2	---	---	Clk1-213	3	retained_intron
TetK27	chr1	58421537	58424784	3247	58423736	310	509.023	84.1365	502.742	TetK27_peak_651	Clk1	ENSMUST00000148330.7	-	58412000	58424067	TSS	0	-9537	0.209728	0.779249	---	ENSMUSG00000026034.17	Clk1	protein_coding	OTTMUSG00000021803.1	OTTMUST00000051746.1	2	---	ENSMUSP00000137649.1	Clk1-210	1	nonsense_mediated_decay
TetK27	chr1	58443988	58444271	283	58444170	11	4.58302	3.24643	2.81413	TetK27_peak_652	Nif3l1	ENSMUST00000114337.7	+	58445267	58481817	TSS	-996	-37546	0.000000	0.000000	---	ENSMUSG00000026036.17	Nif3l1	protein_coding	OTTMUSG00000021967.1	OTTMUST00000052149.1	1	---	ENSMUSP00000109976.1	Nif3l1-202	2	protein_coding
TetK27	chr1	58444436	58446714	2278	58445299	108	122.043	25.7669	119.266	TetK27_peak_653	Ppil3	ENSMUST00000114345.8	-	58433787	58445370	TSS	0	-10649	0.080715	0.410268	CCDS35580.1	ENSMUSG00000026035.15	Ppil3	protein_coding	OTTMUSG00000021988.1	OTTMUST00000052204.1	2	---	ENSMUSP00000109984.2	Ppil3-202	1	protein_coding
TetK27	chr1	58454177	58454446	269	58454297	14	6.74667	4.05803	4.90229	TetK27_peak_654	Nif3l1	ENSMUST00000185578.1	+	58453404	58456189	CDS Exon 1	773	-1743	0.096913	1.000000	---	ENSMUSG00000026036.17	Nif3l1	protein_coding	OTTMUSG00000021967.1	OTTMUST00000122069.1	2	---	---	Nif3l1-207		retained_intron
TetK27	chr1	58504168	58505219	1051	58504705	129	121.941	18.7804	119.164	TetK27_peak_655	Orc2	ENSMUST00000191206.1	-	58500346	58504956	TSS	0	-3822	0.171113	0.750000	---	ENSMUSG00000026037.14	Orc2	protein_coding	OTTMUSG00000021969.1	OTTMUST00000122072.1	2	---	ENSMUSP00000141138.1	Orc2-205	1	protein_coding
TetK27	chr1	58505304	58505571	267	58505350	15	5.23907	3.16584	3.46338	TetK27_peak_656	Orc2	ENSMUST00000191206.1	-	58500346	58504956	TSS	-348	-4958	0.000000	0.000000	---	ENSMUSG00000026037.14	Orc2	protein_coding	OTTMUSG00000021969.1	OTTMUST00000122072.1	2	---	ENSMUSP00000141138.1	Orc2-205	1	protein_coding
TetK27	chr1	58585528	58587139	1611	58586501	144	190.605	39.2276	187.468	TetK27_peak_657	Fam126b	ENSMUST00000161000.1	-	58552187	58586276	TSS	0	-33341	0.021971	0.464640	---	ENSMUSG00000038174.14	Fam126b	protein_coding	OTTMUSG00000026622.1	OTTMUST00000065883.1	2	---	ENSMUSP00000125653.1	Fam126b-206	3	protein_coding
TetK27	chr1	58651319	58654014	2695	58652760	241	288.997	34.9605	285.252	TetK27_peak_658	Gm20257	ENSMUST00000188643.1	+	58654945	58655075	TSS	-931	-1061	0.000000	0.000000	---	ENSMUSG00000102059.1	Gm20257	transcribed_unprocessed_pseudogene	OTTMUSG00000047213.1	OTTMUST00000122087.1	2	PGO:0000005 | PGO:0000019	---	Gm20257-202		transcribed_unprocessed_pseudogene
TetK27	chr1	58654566	58654817	251	58654759	11	4.5734	3.24094	2.81413	TetK27_peak_659	Gm20257	ENSMUST00000188643.1	+	58654945	58655075	TSS	-128	-258	0.000000	0.000000	---	ENSMUSG00000102059.1	Gm20257	transcribed_unprocessed_pseudogene	OTTMUSG00000047213.1	OTTMUST00000122087.1	2	PGO:0000005 | PGO:0000019	---	Gm20257-202		transcribed_unprocessed_pseudogene
TetK27	chr1	58709588	58712807	3219	58711677	291	428.096	61.2338	423.009	TetK27_peak_660	Cflar	ENSMUST00000123553.1	+	58713302	58723071	TSS	-495	-10264	0.000000	0.000000	---	ENSMUSG00000026031.15	Cflar	protein_coding	OTTMUSG00000019581.1	OTTMUST00000046769.1	2	---	---	Cflar-207	2	processed_transcript
TetK27	chr1	58713003	58724548	11545	58713451	113	138.457	30.841	135.592	TetK27_peak_661	Cflar	ENSMUST00000123553.1	+	58713302	58723071	TSS	0	0	1.000000	0.846180	---	ENSMUSG00000026031.15	Cflar	protein_coding	OTTMUSG00000019581.1	OTTMUST00000046769.1	2	---	---	Cflar-207	2	processed_transcript
TetK27	chr1	58724800	58725117	317	58724965	13	5.99569	3.7875	4.17465	TetK27_peak_662	Cflar	ENSMUST00000069333.7	+	58713317	58755166	5' UTR Exon	11483	-30049	0.007599	1.000000	CCDS14978.1	ENSMUSG00000026031.15	Cflar	protein_coding	OTTMUSG00000019581.1	OTTMUST00000046767.1	2	---	ENSMUSP00000065107.7	Cflar-201	1	protein_coding
TetK27	chr1	58725179	58730372	5193	58728209	117	145	31.9232	142.1	TetK27_peak_663	Cflar	ENSMUST00000123032.1	+	58730552	58752454	TSS	-180	-22082	0.000000	0.000000	---	ENSMUSG00000026031.15	Cflar	protein_coding	OTTMUSG00000019581.1	OTTMUST00000046773.1	2	---	---	Cflar-206	5	processed_transcript
TetK27	chr1	58730777	58731238	461	58730990	17	7.96295	4.25508	6.09287	TetK27_peak_664	Cflar	ENSMUST00000164900.7	+	58711510	58731247	TTS	19267	-9	0.023407	1.000000	---	ENSMUSG00000026031.15	Cflar	protein_coding	OTTMUSG00000019581.1	OTTMUST00000089964.1	2	---	---	Cflar-212	3	processed_transcript
TetK27	chr1	58731437	58731797	360	58731660	16	8.32904	4.5991	6.44257	TetK27_peak_665	Cflar	ENSMUST00000123032.1	+	58730552	58752454	Intron 2	885	-20657	0.016482	1.000000	---	ENSMUSG00000026031.15	Cflar	protein_coding	OTTMUSG00000019581.1	OTTMUST00000046773.1	2	---	---	Cflar-206	5	processed_transcript
TetK27	chr1	58732996	58738249	5253	58734397	68	60.0895	14.4696	57.6684	TetK27_peak_666	Cflar	ENSMUST00000114309.7	+	58713294	58733228	TTS	19702	0	0.011688	0.044347	CCDS35582.1	ENSMUSG00000026031.15	Cflar	protein_coding	OTTMUSG00000019581.1	OTTMUST00000046768.1	2	---	ENSMUSP00000109948.1	Cflar-204	1	protein_coding
TetK27	chr1	58738439	58740678	2239	58739769	35	27.2007	9.73928	25.0412	TetK27_peak_667	Cflar	ENSMUST00000123032.1	+	58730552	58752454	CDS Exon 5	7887	-11776	0.102269	1.000000	---	ENSMUSG00000026031.15	Cflar	protein_coding	OTTMUSG00000019581.1	OTTMUST00000046773.1	2	---	---	Cflar-206	5	processed_transcript
TetK27	chr1	58741069	58744371	3302	58743203	67	64.2353	16.553	61.7871	TetK27_peak_668	Cflar	ENSMUST00000123032.1	+	58730552	58752454	Intron 6	10517	-8083	0.150801	1.000000	---	ENSMUSG00000026031.15	Cflar	protein_coding	OTTMUSG00000019581.1	OTTMUST00000046773.1	2	---	---	Cflar-206	5	processed_transcript
TetK27	chr1	58744448	58745015	567	58744780	24	15.5448	6.76339	13.5242	TetK27_peak_669	Cflar	ENSMUST00000123032.1	+	58730552	58752454	Intron 6	13896	-7439	0.025933	1.000000	---	ENSMUSG00000026031.15	Cflar	protein_coding	OTTMUSG00000019581.1	OTTMUST00000046773.1	2	---	---	Cflar-206	5	processed_transcript
TetK27	chr1	58746528	58747073	545	58746862	14	6.74667	4.05803	4.90229	TetK27_peak_670	Cflar	ENSMUST00000123032.1	+	58730552	58752454	Intron 6	15976	-5381	0.024928	1.000000	---	ENSMUSG00000026031.15	Cflar	protein_coding	OTTMUSG00000019581.1	OTTMUST00000046773.1	2	---	---	Cflar-206	5	processed_transcript
TetK27	chr1	58753742	58754008	266	58753891	12	5.2738	3.51696	3.47795	TetK27_peak_671	Cflar	ENSMUST00000097722.8	+	58711551	58753977	TTS	42191	0	0.005562	0.883895	---	ENSMUSG00000026031.15	Cflar	protein_coding	OTTMUSG00000019581.1	OTTMUST00000046765.1	2	---	ENSMUSP00000095329.2	Cflar-202	5	protein_coding
TetK27	chr1	58760535	58760922	387	58760692	16	8.32904	4.5991	6.44257	TetK27_peak_672	.	.	.	.	.	Intergenic	.	.	.	.	.	.	.	.	.	.	.	.	.	.	.	.
TetK27	chr1	58773769	58774198	429	58774018	13	5.11059	3.30951	3.33512	TetK27_peak_673	.	.	.	.	.	Intergenic	.	.	.	.	.	.	.	.	.	.	.	.	.	.	.	.
TetK27	chr1	58794288	58796336	2048	58795690	182	244.288	43.26	240.844	TetK27_peak_674	Casp8	ENSMUST00000191201.6	+	58795477	58846755	TSS	0	-50419	0.016771	0.419717	CCDS78590.1	ENSMUSG00000026029.14	Casp8	protein_coding	OTTMUSG00000047216.1	OTTMUST00000122092.1	2	---	ENSMUSP00000140546.1	Casp8-204	5	protein_coding
TetK27	chr1	58796810	58798374	1564	58797411	69	71.078	18.9375	68.5858	TetK27_peak_675	Gm37760	ENSMUST00000194726.1	+	58797783	58801624	TSS	0	-3250	0.154086	0.378275	---	ENSMUSG00000102719.1	Gm37760	TEC	OTTMUSG00000047217.1	OTTMUST00000122095.1	2	---	---	Gm37760-201		TEC
TetK27	chr1	58798644	58799038	394	58798887	15	7.52498	4.32857	5.65872	TetK27_peak_676	Gm37760	ENSMUST00000194726.1	+	58797783	58801624	CDS Exon 1	861	-2586	0.102811	1.000000	---	ENSMUSG00000102719.1	Gm37760	TEC	OTTMUSG00000047217.1	OTTMUST00000122095.1	2	---	---	Gm37760-201		TEC
TetK27	chr1	58800512	58800763	251	58800604	14	6.74667	4.05803	4.90229	TetK27_peak_677	Gm37760	ENSMUST00000194726.1	+	58797783	58801624	TTS	2729	-861	0.065591	1.000000	---	ENSMUSG00000102719.1	Gm37760	TEC	OTTMUSG00000047217.1	OTTMUST00000122095.1	2	---	---	Gm37760-201		TEC
TetK27	chr1	58801578	58804245	2667	58802768	118	146.645	32.1937	143.736	TetK27_peak_678	Casp8	ENSMUST00000165549.7	+	58802502	58847009	TSS	0	-42764	0.039184	0.653673	CCDS14979.1	ENSMUSG00000026029.14	Casp8	protein_coding	OTTMUSG00000047216.1	OTTMUST00000122093.1	2	---	ENSMUSP00000127375.1	Casp8-202	1	protein_coding
TetK27	chr1	58804816	58805438	622	58804970	16	7.21211	4.01869	5.36317	TetK27_peak_679	Casp8	ENSMUST00000165549.7	+	58802502	58847009	5' UTR Exon	2314	-41571	0.013997	1.000000	CCDS14979.1	ENSMUSG00000026029.14	Casp8	protein_coding	OTTMUSG00000047216.1	OTTMUST00000122093.1	2	---	ENSMUSP00000127375.1	Casp8-202	1	protein_coding
TetK27	chr1	58805719	58806360	641	58806032	21	12.6908	5.95178	10.7156	TetK27_peak_680	Casp8	ENSMUST00000165549.7	+	58802502	58847009	5' UTR Exon	3217	-40649	0.014424	1.000000	CCDS14979.1	ENSMUSG00000026029.14	Casp8	protein_coding	OTTMUSG00000047216.1	OTTMUST00000122093.1	2	---	ENSMUSP00000127375.1	Casp8-202	1	protein_coding
TetK27	chr1	58806664	58807330	666	58806881	27	18.5511	7.57499	16.4886	TetK27_peak_681	Casp8	ENSMUST00000165549.7	+	58802502	58847009	5' UTR Exon	4162	-39679	0.014986	1.000000	CCDS14979.1	ENSMUSG00000026029.14	Casp8	protein_coding	OTTMUSG00000047216.1	OTTMUST00000122093.1	2	---	ENSMUSP00000127375.1	Casp8-202	1	protein_coding
TetK27	chr1	58807383	58807758	375	58807620	13	5.99569	3.7875	4.17465	TetK27_peak_682	Casp8	ENSMUST00000165549.7	+	58802502	58847009	5' UTR Exon	4881	-39251	0.008448	1.000000	CCDS14979.1	ENSMUSG00000026029.14	Casp8	protein_coding	OTTMUSG00000047216.1	OTTMUST00000122093.1	2	---	ENSMUSP00000127375.1	Casp8-202	1	protein_coding
TetK27	chr1	58821464	58821995	531	58821616	18	10.0089	5.14017	8.08393	TetK27_peak_683	Casp8	ENSMUST00000165549.7	+	58802502	58847009	5' UTR Exon	18962	-25014	0.011953	1.000000	CCDS14979.1	ENSMUSG00000026029.14	Casp8	protein_coding	OTTMUSG00000047216.1	OTTMUST00000122093.1	2	---	ENSMUSP00000127375.1	Casp8-202	1	protein_coding
TetK27	chr1	58822996	58824330	1334	58823278	19	10.8823	5.41071	8.93972	TetK27_peak_684	Casp8	ENSMUST00000165549.7	+	58802502	58847009	CDS Exon 2	20494	-22679	0.029995	1.000000	CCDS14979.1	ENSMUSG00000026029.14	Casp8	protein_coding	OTTMUSG00000047216.1	OTTMUST00000122093.1	2	---	ENSMUSP00000127375.1	Casp8-202	1	protein_coding
TetK27	chr1	58828094	58828515	421	58828297	11	4.58302	3.24643	2.81413	TetK27_peak_685	Casp8	ENSMUST00000165549.7	+	58802502	58847009	Intron 3	25592	-18494	0.009481	1.000000	CCDS14979.1	ENSMUSG00000026029.14	Casp8	protein_coding	OTTMUSG00000047216.1	OTTMUST00000122093.1	2	---	ENSMUSP00000127375.1	Casp8-202	1	protein_coding
TetK27	chr1	58829577	58829916	339	58829744	13	5.99569	3.7875	4.17465	TetK27_peak_686	Casp8	ENSMUST00000165549.7	+	58802502	58847009	Intron 5	27075	-17093	0.007639	1.000000	CCDS14979.1	ENSMUSG00000026029.14	Casp8	protein_coding	OTTMUSG00000047216.1	OTTMUST00000122093.1	2	---	ENSMUSP00000127375.1	Casp8-202	1	protein_coding
TetK27	chr1	58859549	58860072	523	58859922	20	11.7766	5.68125	9.81736	TetK27_peak_687	Gm28802	ENSMUST00000188624.1	-	58850085	58892793	Intron 8	32721	-9464	0.012269	1.000000	---	ENSMUSG00000099719.1	Gm28802	unprocessed_pseudogene	OTTMUSG00000047218.1	OTTMUST00000122096.1	2	PGO:0000005	---	Gm28802-201		unprocessed_pseudogene
TetK27	chr1	58900729	58902369	1640	58901376	31	22.7693	8.65714	20.656	TetK27_peak_688	Trak2	ENSMUST00000027186.11	-	58900449	58973431	TTS	71062	-280	0.022485	1.000000	CCDS14980.1	ENSMUSG00000026028.12	Trak2	protein_coding	OTTMUSG00000037699.1	OTTMUST00000097369.1	2	---	ENSMUSP00000027186.5	Trak2-201	1	protein_coding
TetK27	chr1	58902984	58903249	265	58903083	12	5.2738	3.51696	3.47795	TetK27_peak_689	Trak2	ENSMUST00000027186.11	-	58900449	58973431	3' UTR Exon	70182	-2535	0.003645	1.000000	CCDS14980.1	ENSMUSG00000026028.12	Trak2	protein_coding	OTTMUSG00000037699.1	OTTMUST00000097369.1	2	---	ENSMUSP00000027186.5	Trak2-201	1	protein_coding
TetK27	chr1	58955785	58956036	251	58955949	14	6.74667	4.05803	4.90229	TetK27_peak_690	Trak2	ENSMUST00000173590.1	-	58926663	58973430	5' UTR Exon	17394	-29122	0.005388	1.000000	---	ENSMUSG00000026028.12	Trak2	protein_coding	OTTMUSG00000037699.1	OTTMUST00000097372.1	2	---	ENSMUSP00000134499.1	Trak2-203	2	protein_coding
TetK27	chr1	58956320	58956683	363	58956510	22	13.6241	6.22232	11.6331	TetK27_peak_691	Trak2	ENSMUST00000173590.1	-	58926663	58973430	5' UTR Exon	16747	-29657	0.007783	1.000000	---	ENSMUSG00000026028.12	Trak2	protein_coding	OTTMUSG00000037699.1	OTTMUST00000097372.1	2	---	ENSMUSP00000134499.1	Trak2-203	2	protein_coding
TetK27	chr1	58972551	58974313	1762	58973186	174	230.33	41.3689	226.971	TetK27_peak_692	Stradb	ENSMUST00000123301.7	+	58973522	58994998	TSS	0	-20685	0.036877	0.449234	---	ENSMUSG00000026027.13	Stradb	protein_coding	OTTMUSG00000021303.1	OTTMUST00000049163.1	2	---	ENSMUSP00000138036.1	Stradb-203	1	nonsense_mediated_decay
TetK27	chr1	59119322	59120686	1364	59120047	144	176.702	33.118	173.639	TetK27_peak_693	G730003C15Rik	ENSMUST00000189096.1	+	59119833	59122142	TSS	0	-1456	0.369697	0.625641	---	ENSMUSG00000097573.2	G730003C15Rik	antisense_RNA	OTTMUSG00000047222.1	OTTMUST00000122107.1	2	---	---	G730003C15Rik-202		antisense_RNA
TetK27	chr1	59161887	59162378	491	59162131	25	16.5309	7.03392	14.4964	TetK27_peak_694	Mpp4	ENSMUST00000078874.13	-	59120935	59161637	TSS	-250	-40952	0.000000	0.000000	CCDS48271.1	ENSMUSG00000079550.9	Mpp4	protein_coding	OTTMUSG00000047223.1	OTTMUST00000122109.1	2	---	ENSMUSP00000077914.7	Mpp4-202	1	protein_coding
TetK27	chr1	59162578	59164095	1517	59163454	58	55.8771	15.9616	53.4842	TetK27_peak_695	Mpp4	ENSMUST00000078874.13	-	59120935	59161637	TSS	-941	-41643	0.000000	0.000000	CCDS48271.1	ENSMUSG00000079550.9	Mpp4	protein_coding	OTTMUSG00000047223.1	OTTMUST00000122109.1	2	---	ENSMUSP00000077914.7	Mpp4-202	1	protein_coding
TetK27	chr1	59177599	59178699	1100	59177962	21	12.6908	5.95178	10.7156	TetK27_peak_696	Als2	ENSMUST00000163058.1	-	59164058	59237094	CDS Exon 25	58395	-13541	0.015075	1.000000	CCDS35583.1	ENSMUSG00000026024.14	Als2	protein_coding	OTTMUSG00000021752.1	OTTMUST00000051628.1	2	---	ENSMUSP00000125753.1	Als2-204	1	protein_coding
TetK27	chr1	59179476	59180936	1460	59180388	34	26.0742	9.46874	23.926	TetK27_peak_697	Als2	ENSMUST00000163058.1	-	59164058	59237094	CDS Exon 23	56158	-15418	0.020004	1.000000	CCDS35583.1	ENSMUSG00000026024.14	Als2	protein_coding	OTTMUSG00000021752.1	OTTMUST00000051628.1	2	---	ENSMUSP00000125753.1	Als2-204	1	protein_coding
TetK27	chr1	59236567	59238327	1760	59237018	197	254.546	40.2536	251.038	TetK27_peak_698	Als2	ENSMUST00000027178.12	-	59162926	59237232	TSS	0	-73641	0.008963	0.378194	CCDS35583.1	ENSMUSG00000026024.14	Als2	protein_coding	OTTMUSG00000021752.1	OTTMUST00000051627.1	2	---	ENSMUSP00000027178.6	Als2-201	1	protein_coding
TetK27	chr1	59481243	59482728	1485	59482501	25	11.5834	4.76248	9.63625	TetK27_peak_699	Fzd7	ENSMUST00000114246.3	+	59482424	59486956	TSS	0	-4228	0.067284	0.205249	CCDS14985.1	ENSMUSG00000041075.8	Fzd7	protein_coding	OTTMUSG00000020777.1	OTTMUST00000049127.1	2	---	ENSMUSP00000109884.2	Fzd7-201		protein_coding
TetK27	chr1	59565299	59565632	333	59565418	13	5.99569	3.7875	4.17465	TetK27_peak_700	Gm973	ENSMUST00000187979.1	+	59558008	59566637	Intron 2	7291	-1005	0.038702	1.000000	---	ENSMUSG00000047361.16	Gm973	protein_coding	OTTMUSG00000047232.1	OTTMUST00000122133.1	2	---	---	Gm973-207	3	retained_intron
TetK27	chr1	59601280	59601783	503	59601606	15	4.31751	2.73722	2.57671	TetK27_peak_701	Sumo1	ENSMUST00000191158.6	-	59586558	59670793	Intron 3	69010	-14722	0.005983	1.000000	---	ENSMUSG00000026021.15	Sumo1	protein_coding	OTTMUSG00000022159.1	OTTMUST00000122141.1	2	---	---	Sumo1-204	1	processed_transcript
TetK27	chr1	59602025	59603235	1210	59602580	39	31.822	10.8214	29.6171	TetK27_peak_702	Sumo1	ENSMUST00000191158.6	-	59586558	59670793	Intron 3	67558	-15467	0.014376	1.000000	---	ENSMUSG00000026021.15	Sumo1	protein_coding	OTTMUSG00000022159.1	OTTMUST00000122141.1	2	---	---	Sumo1-204	1	processed_transcript
TetK27	chr1	59603880	59604393	513	59604197	14	6.73409	4.05117	4.90229	TetK27_peak_703	Sumo1	ENSMUST00000191158.6	-	59586558	59670793	Intron 3	66400	-17322	0.006102	1.000000	---	ENSMUSG00000026021.15	Sumo1	protein_coding	OTTMUSG00000022159.1	OTTMUST00000122141.1	2	---	---	Sumo1-204	1	processed_transcript
TetK27	chr1	59607914	59609520	1606	59608412	84	76.3933	16.0166	73.8717	TetK27_peak_704	Gm973	ENSMUST00000185753.6	+	59606816	59630304	Intron 2	1098	-20784	0.068415	1.000000	---	ENSMUSG00000047361.16	Gm973	protein_coding	OTTMUSG00000047232.1	OTTMUST00000122135.1	2	---	---	Gm973-203	3	processed_transcript
TetK27	chr1	59669732	59671861	2129	59670364	251	370.381	59.5712	365.922	TetK27_peak_705	Sumo1	ENSMUST00000185265.1	-	59639944	59670740	TSS	0	-29788	0.032763	0.473709	---	ENSMUSG00000026021.15	Sumo1	protein_coding	OTTMUSG00000022159.1	OTTMUST00000122173.1	2	---	ENSMUSP00000140729.1	Sumo1-203	3	protein_coding
TetK27	chr1	59684260	59686788	2528	59685144	210	310.62	57.083	306.704	TetK27_peak_706	Nop58	ENSMUST00000186044.1	+	59685006	59690990	TSS	0	-4202	0.297911	0.705022	---	ENSMUSG00000026020.9	Nop58	protein_coding	OTTMUSG00000047257.1	OTTMUST00000122180.1	2	---	---	Nop58-204	2	retained_intron
TetK27	chr1	59687614	59687865	251	59687702	11	4.58302	3.24643	2.81413	TetK27_peak_707	Nop58	ENSMUST00000185772.6	+	59685021	59696053	5' UTR Exon	2593	-8188	0.022841	1.000000	---	ENSMUSG00000026020.9	Nop58	protein_coding	OTTMUSG00000047257.1	OTTMUST00000122182.1	2	---	ENSMUSP00000139474.1	Nop58-203	3	protein_coding
TetK27	chr1	59738343	59740526	2183	59739446	93	99.5562	22.221	96.8983	TetK27_peak_708	.	.	.	.	.	Intergenic	.	.	.	.	.	.	.	.	.	.	.	.	.	.	.	.
TetK27	chr1	59755101	59755414	313	59755265	12	5.2738	3.51696	3.47795	TetK27_peak_709	.	.	.	.	.	Intergenic	.	.	.	.	.	.	.	.	.	.	.	.	.	.	.	.
TetK27	chr1	59762129	59765019	2890	59763095	209	260.941	37.5371	257.392	TetK27_peak_710	Bmpr2	ENSMUST00000087435.6	+	59763400	59879015	TSS	0	-113996	0.014012	0.560360	CCDS35588.1	ENSMUSG00000067336.6	Bmpr2	protein_coding	OTTMUSG00000047258.1	OTTMUST00000122191.1	2	---	ENSMUSP00000084701.5	Bmpr2-201	1	protein_coding
TetK27	chr1	59886177	59888053	1876	59887656	32	23.8582	8.92767	21.733	TetK27_peak_711	Gm37977	ENSMUST00000193096.1	-	59886969	59887690	TSS	0	0	1.000000	0.384656	---	ENSMUSG00000103131.1	Gm37977	TEC	OTTMUSG00000047260.1	OTTMUST00000122194.1	2	---	---	Gm37977-201		TEC
TetK27	chr1	59912301	59916087	3786	59913156	315	412.775	45.6509	407.872	TetK27_peak_712	Fam117b	ENSMUST00000036540.11	+	59913006	59985347	TSS	0	-69260	0.042603	0.813837	CCDS14986.1	ENSMUSG00000041040.12	Fam117b	protein_coding	OTTMUSG00000020914.1	OTTMUST00000049436.1	2	---	ENSMUSP00000041671.5	Fam117b-201	1	protein_coding
TetK27	chr1	59922328	59922579	251	59922415	13	5.99569	3.7875	4.17465	TetK27_peak_713	Fam117b	ENSMUST00000036540.11	+	59913006	59985347	Intron 1	9322	-62768	0.003483	1.000000	CCDS14986.1	ENSMUSG00000041040.12	Fam117b	protein_coding	OTTMUSG00000020914.1	OTTMUST00000049436.1	2	---	ENSMUSP00000041671.5	Fam117b-201	1	protein_coding
TetK27	chr1	59923071	59923717	646	59923403	14	6.74667	4.05803	4.90229	TetK27_peak_714	Fam117b	ENSMUST00000036540.11	+	59913006	59985347	Intron 1	10065	-61630	0.008944	1.000000	CCDS14986.1	ENSMUSG00000041040.12	Fam117b	protein_coding	OTTMUSG00000020914.1	OTTMUST00000049436.1	2	---	ENSMUSP00000041671.5	Fam117b-201	1	protein_coding
TetK27	chr1	59983094	59984467	1373	59983635	21	12.6908	5.95178	10.7156	TetK27_peak_715	Ica1l	ENSMUST00000185891.1	-	59982490	59990928	TTS	6461	-604	0.162815	1.000000	---	ENSMUSG00000026018.12	Ica1l	protein_coding	OTTMUSG00000047263.1	OTTMUST00000122198.1	2	---	---	Ica1l-202	3	processed_transcript
TetK27	chr1	60015373	60018396	3023	60015935	103	122.371	28.1357	119.59	TetK27_peak_716	Ica1l	ENSMUST00000187364.1	-	60015255	60022616	TTS	4220	-118	0.410758	1.000000	---	ENSMUSG00000026018.12	Ica1l	protein_coding	OTTMUSG00000047263.1	OTTMUST00000122202.1	2	---	---	Ica1l-204	3	retained_intron
TetK27	chr1	60042457	60043556	1099	60042997	78	58.4646	11.4127	56.0589	TetK27_peak_717	Ica1l	ENSMUST00000027172.12	-	59989068	60043088	TSS	0	-53389	0.011699	0.574545	CCDS14987.1	ENSMUSG00000026018.12	Ica1l	protein_coding	OTTMUSG00000047263.1	OTTMUST00000122199.1	2	---	ENSMUSP00000027172.6	Ica1l-201	1	protein_coding
TetK27	chr1	60070431	60071285	854	60070759	48	42.8229	13.2562	40.5251	TetK27_peak_718	Wdr12	ENSMUST00000027173.14	-	60069785	60097909	TTS	26624	-646	0.030400	1.000000	CCDS14988.1	ENSMUSG00000026019.15	Wdr12	protein_coding	OTTMUSG00000021598.1	OTTMUST00000051272.1	2	---	ENSMUSP00000027173.8	Wdr12-201	1	protein_coding
TetK27	chr1	60097106	60099073	1967	60098527	234	326.206	50.5534	322.161	TetK27_peak_719	Wdr12	ENSMUST00000027173.14	-	60069785	60097909	TSS	0	-27321	0.028587	0.408537	CCDS14988.1	ENSMUSG00000026019.15	Wdr12	protein_coding	OTTMUSG00000021598.1	OTTMUST00000051272.1	2	---	ENSMUSP00000027173.8	Wdr12-201	1	protein_coding
TetK27	chr1	60179790	60181397	1607	60180744	244	284.817	32.8398	281.103	TetK27_peak_720	Nbeal1	ENSMUST00000160834.7	+	60180599	60338329	TSS	0	-156932	0.005066	0.496891	CCDS48274.1	ENSMUSG00000073664.11	Nbeal1	protein_coding	OTTMUSG00000034193.1	OTTMUST00000086714.1	2	---	ENSMUSP00000124056.1	Nbeal1-203	5	protein_coding
TetK27	chr1	60342733	60344304	1571	60343385	196	218.381	28.4596	215.092	TetK27_peak_721	Cyp20a1	ENSMUST00000148443.2	+	60343323	60388061	TSS	0	-43757	0.021950	0.624682	---	ENSMUSG00000049439.13	Cyp20a1	protein_coding	OTTMUSG00000021516.1	OTTMUST00000051030.1	2	---	ENSMUSP00000137471.1	Cyp20a1-203	1	nonsense_mediated_decay
TetK27	chr1	60408880	60410676	1796	60409968	184	200.265	26.726	197.075	TetK27_peak_722	Abi2	ENSMUST00000187709.6	+	60409803	60477159	TSS	0	-66483	0.012976	0.486366	---	ENSMUSG00000026782.15	Abi2	protein_coding	OTTMUSG00000047318.1	OTTMUST00000122378.1	2	---	ENSMUSP00000139867.1	Abi2-205	5	protein_coding
TetK27	chr1	60416905	60417181	276	60417076	15	7.52498	4.32857	5.65872	TetK27_peak_723	Abi2	ENSMUST00000187709.6	+	60409803	60477159	Intron 1	7102	-59978	0.004112	1.000000	---	ENSMUSG00000026782.15	Abi2	protein_coding	OTTMUSG00000047318.1	OTTMUST00000122378.1	2	---	ENSMUSP00000139867.1	Abi2-205	5	protein_coding
TetK27	chr1	60459778	60461797	2019	60461168	34	26.0742	9.46874	23.926	TetK27_peak_724	Abi2	ENSMUST00000187709.6	+	60409803	60477159	Intron 7	49975	-15362	0.029989	1.000000	---	ENSMUSG00000026782.15	Abi2	protein_coding	OTTMUSG00000047318.1	OTTMUST00000122378.1	2	---	ENSMUSP00000139867.1	Abi2-205	5	protein_coding
TetK27	chr1	60489507	60489808	301	60489644	12	5.2738	3.51696	3.47795	TetK27_peak_725	Raph1	ENSMUST00000140485.7	-	60482292	60566780	CDS Exon 14	76972	-7215	0.003574	1.000000	CCDS48275.2	ENSMUSG00000026014.15	Raph1	protein_coding	OTTMUSG00000002211.1	OTTMUST00000004475.1	2	---	ENSMUSP00000121023.2	Raph1-204	5	protein_coding
TetK27	chr1	60539346	60539945	599	60539440	15	7.52498	4.32857	5.65872	TetK27_peak_726	Raph1	ENSMUST00000027168.11	-	60483236	60566766	5' UTR Exon	26821	-56110	0.007183	1.000000	---	ENSMUSG00000026014.15	Raph1	protein_coding	OTTMUSG00000002211.1	---	3	---	ENSMUSP00000027168.5	Raph1-201	5	protein_coding
TetK27	chr1	60540105	60541033	928	60540323	21	12.6908	5.95178	10.7156	TetK27_peak_727	Raph1	ENSMUST00000027168.11	-	60483236	60566766	5' UTR Exon	25733	-56869	0.011122	1.000000	---	ENSMUSG00000026014.15	Raph1	protein_coding	OTTMUSG00000002211.1	---	3	---	ENSMUSP00000027168.5	Raph1-201	5	protein_coding
TetK27	chr1	60541937	60542251	314	60542044	14	6.74667	4.05803	4.90229	TetK27_peak_728	Raph1	ENSMUST00000027168.11	-	60483236	60566766	5' UTR Exon	24515	-58701	0.003771	1.000000	---	ENSMUSG00000026014.15	Raph1	protein_coding	OTTMUSG00000002211.1	---	3	---	ENSMUSP00000027168.5	Raph1-201	5	protein_coding
TetK27	chr1	60542364	60543475	1111	60543021	32	23.8582	8.92767	21.733	TetK27_peak_729	Raph1	ENSMUST00000027168.11	-	60483236	60566766	5' UTR Exon	23291	-59128	0.013312	1.000000	---	ENSMUSG00000026014.15	Raph1	protein_coding	OTTMUSG00000002211.1	---	3	---	ENSMUSP00000027168.5	Raph1-201	5	protein_coding
TetK27	chr1	60543719	60543980	261	60543825	16	8.32904	4.5991	6.44257	TetK27_peak_730	Raph1	ENSMUST00000027168.11	-	60483236	60566766	5' UTR Exon	22786	-60483	0.003137	1.000000	---	ENSMUSG00000026014.15	Raph1	protein_coding	OTTMUSG00000002211.1	---	3	---	ENSMUSP00000027168.5	Raph1-201	5	protein_coding
TetK27	chr1	60565756	60567369	1613	60566495	149	122.475	14.7749	119.693	TetK27_peak_731	Raph1	ENSMUST00000027168.11	-	60483236	60566766	TSS	0	-82520	0.012103	0.626394	---	ENSMUSG00000026014.15	Raph1	protein_coding	OTTMUSG00000002211.1	---	3	---	ENSMUSP00000027168.5	Raph1-201	5	protein_coding
TetK27	chr1	60568857	60569212	355	60569008	14	6.74667	4.05803	4.90229	TetK27_peak_732	.	.	.	.	.	Intergenic	.	.	.	.	.	.	.	.	.	.	.	.	.	.	.	.
TetK27	chr1	60652085	60653132	1047	60652778	44	37.8375	12.1741	35.5808	TetK27_peak_733	.	.	.	.	.	Intergenic	.	.	.	.	.	.	.	.	.	.	.	.	.	.	.	.
TetK27	chr1	60745381	60752731	7350	60746915	109	131.975	29.7589	129.143	TetK27_peak_734	Cd28	ENSMUST00000027165.2	+	60746358	60773360	TSS	0	-20629	0.236048	0.867093	CCDS14992.1	ENSMUSG00000026012.2	Cd28	protein_coding	OTTMUSG00000002254.1	OTTMUST00000004499.1	2	---	ENSMUSP00000027165.2	Cd28-201	1	protein_coding
TetK27	chr1	60753065	60754902	1837	60754422	44	34.5336	10.6377	32.3059	TetK27_peak_735	Cd28	ENSMUST00000027165.2	+	60746358	60773360	Intron 1	6707	-18458	0.068067	1.000000	CCDS14992.1	ENSMUSG00000026012.2	Cd28	protein_coding	OTTMUSG00000002254.1	OTTMUST00000004499.1	2	---	ENSMUSP00000027165.2	Cd28-201	1	protein_coding
TetK27	chr1	60755070	60761121	6051	60759658	63	62.6861	17.3143	60.2474	TetK27_peak_736	Cd28	ENSMUST00000027165.2	+	60746358	60773360	Intron 1	8712	-12239	0.224123	1.000000	CCDS14992.1	ENSMUSG00000026012.2	Cd28	protein_coding	OTTMUSG00000002254.1	OTTMUST00000004499.1	2	---	ENSMUSP00000027165.2	Cd28-201	1	protein_coding
TetK27	chr1	60761214	60763185	1971	60761764	44	34.5336	10.6377	32.3059	TetK27_peak_737	Cd28	ENSMUST00000132833.1	+	60716800	60763164	TTS	44414	0	0.042079	0.989351	---	ENSMUSG00000026012.2	Cd28	protein_coding	OTTMUSG00000002254.1	OTTMUST00000005226.1	2	---	---	Cd28-202	5	processed_transcript
TetK27	chr1	60764895	60765881	986	60765212	20	11.7766	5.68125	9.81736	TetK27_peak_738	Cd28	ENSMUST00000027165.2	+	60746358	60773360	CDS Exon 3	18537	-7479	0.036551	1.000000	CCDS14992.1	ENSMUSG00000026012.2	Cd28	protein_coding	OTTMUSG00000002254.1	OTTMUST00000004499.1	2	---	ENSMUSP00000027165.2	Cd28-201	1	protein_coding
TetK27	chr1	60766131	60766472	341	60766310	16	8.32904	4.5991	6.44257	TetK27_peak_739	Cd28	ENSMUST00000027165.2	+	60746358	60773360	Intron 3	19773	-6888	0.012665	1.000000	CCDS14992.1	ENSMUSG00000026012.2	Cd28	protein_coding	OTTMUSG00000002254.1	OTTMUST00000004499.1	2	---	ENSMUSP00000027165.2	Cd28-201	1	protein_coding
TetK27	chr1	60766601	60769244	2643	60768793	29	20.6319	8.11607	18.5431	TetK27_peak_740	Cd28	ENSMUST00000027165.2	+	60746358	60773360	Intron 3	20243	-4116	0.097915	1.000000	CCDS14992.1	ENSMUSG00000026012.2	Cd28	protein_coding	OTTMUSG00000002254.1	OTTMUST00000004499.1	2	---	ENSMUSP00000027165.2	Cd28-201	1	protein_coding
TetK27	chr1	60769411	60770237	826	60770004	19	10.8823	5.41071	8.93972	TetK27_peak_741	Cd28	ENSMUST00000027165.2	+	60746358	60773360	CDS Exon 4	23053	-3123	0.030626	1.000000	CCDS14992.1	ENSMUSG00000026012.2	Cd28	protein_coding	OTTMUSG00000002254.1	OTTMUST00000004499.1	2	---	ENSMUSP00000027165.2	Cd28-201	1	protein_coding
TetK27	chr1	60770632	60773010	2378	60771270	33	24.9599	9.19821	22.8231	TetK27_peak_742	Cd28	ENSMUST00000027165.2	+	60746358	60773360	TTS	24274	-350	0.088101	1.000000	CCDS14992.1	ENSMUSG00000026012.2	Cd28	protein_coding	OTTMUSG00000002254.1	OTTMUST00000004499.1	2	---	ENSMUSP00000027165.2	Cd28-201	1	protein_coding
TetK27	chr1	60773609	60777208	3599	60776864	97	99.1285	20.5511	96.4726	TetK27_peak_743	Gm11579	ENSMUST00000145502.1	-	60776665	60781835	TTS	4627	0	0.105202	0.151111	---	ENSMUSG00000086795.1	Gm11579	lincRNA	OTTMUSG00000002257.1	OTTMUST00000004503.1	2	---	---	Gm11579-201	1	lincRNA
TetK27	chr1	60777313	60779817	2504	60777557	56	53.2036	15.4205	50.829	TetK27_peak_744	2310016D23Rik	ENSMUST00000130082.1	+	60778843	60803791	TSS	0	-23974	0.039080	0.389222	---	ENSMUSG00000085965.1	2310016D23Rik	lincRNA	OTTMUSG00000002280.1	OTTMUST00000004526.1	2	---	---	2310016D23Rik-201	1	lincRNA
TetK27	chr1	60781559	60782242	683	60781895	35	24.6014	8.51017	22.4728	TetK27_peak_745	Gm11579	ENSMUST00000145502.1	-	60776665	60781835	TSS	0	-4894	0.053568	0.404971	---	ENSMUSG00000086795.1	Gm11579	lincRNA	OTTMUSG00000002257.1	OTTMUST00000004503.1	2	---	---	Gm11579-201	1	lincRNA
TetK27	chr1	60812670	60812921	251	60812832	12	5.2738	3.51696	3.47795	TetK27_peak_746	.	.	.	.	.	Intergenic	.	.	.	.	.	.	.	.	.	.	.	.	.	.	.	.
TetK27	chr1	60853085	60854022	937	60853772	23	14.5757	6.49285	12.5699	TetK27_peak_747	.	.	.	.	.	Intergenic	.	.	.	.	.	.	.	.	.	.	.	.	.	.	.	.
TetK27	chr1	60854162	60854421	259	60854257	14	6.74667	4.05803	4.90229	TetK27_peak_748	.	.	.	.	.	Intergenic	.	.	.	.	.	.	.	.	.	.	.	.	.	.	.	.
TetK27	chr1	60857629	60858178	549	60857782	25	16.5309	7.03392	14.4964	TetK27_peak_749	.	.	.	.	.	Intergenic	.	.	.	.	.	.	.	.	.	.	.	.	.	.	.	.
TetK27	chr1	60860223	60860867	644	60860468	22	12.0406	5.43705	10.0789	TetK27_peak_750	.	.	.	.	.	Intergenic	.	.	.	.	.	.	.	.	.	.	.	.	.	.	.	.
TetK27	chr1	60862249	60864812	2563	60863336	43	36.6145	11.9036	34.3679	TetK27_peak_751	.	.	.	.	.	Intergenic	.	.	.	.	.	.	.	.	.	.	.	.	.	.	.	.
TetK27	chr1	60865225	60865883	658	60865425	18	10.0089	5.14017	8.08393	TetK27_peak_752	.	.	.	.	.	Intergenic	.	.	.	.	.	.	.	.	.	.	.	.	.	.	.	.
TetK27	chr1	60866636	60866887	251	60866738	13	5.99569	3.7875	4.17465	TetK27_peak_753	.	.	.	.	.	Intergenic	.	.	.	.	.	.	.	.	.	.	.	.	.	.	.	.
TetK27	chr1	60867068	60869909	2841	60868936	48	42.8229	13.2562	40.5251	TetK27_peak_754	.	.	.	.	.	Intergenic	.	.	.	.	.	.	.	.	.	.	.	.	.	.	.	.
TetK27	chr1	60874059	60874329	270	60874245	15	7.52498	4.32857	5.65872	TetK27_peak_755	.	.	.	.	.	Intergenic	.	.	.	.	.	.	.	.	.	.	.	.	.	.	.	.
TetK27	chr1	60875009	60875974	965	60875320	20	9.1644	4.4038	7.25768	TetK27_peak_756	.	.	.	.	.	Intergenic	.	.	.	.	.	.	.	.	.	.	.	.	.	.	.	.
TetK27	chr1	60886596	60887653	1057	60887412	21	12.6908	5.95178	10.7156	TetK27_peak_757	Ctla4	ENSMUST00000124816.1	+	60887000	60912717	TSS	0	-25064	0.025430	0.618147	---	ENSMUSG00000026011.13	Ctla4	protein_coding	OTTMUSG00000002278.1	OTTMUST00000004540.1	2	---	---	Ctla4-203	3	processed_transcript
TetK27	chr1	60888031	60888407	376	60888218	19	10.8823	5.41071	8.93972	TetK27_peak_758	Ctla4	ENSMUST00000124816.1	+	60887000	60912717	Intron 1	1031	-24310	0.014659	1.000000	---	ENSMUSG00000026011.13	Ctla4	protein_coding	OTTMUSG00000002278.1	OTTMUST00000004540.1	2	---	---	Ctla4-203	3	processed_transcript
TetK27	chr1	60898118	60906408	8290	60903252	101	119.203	27.5946	116.438	TetK27_peak_759	Rpl18-ps1	ENSMUST00000121555.1	+	60900898	60901423	TSS	0	0	1.000000	0.063442	---	ENSMUSG00000081382.1	Rpl18-ps1	processed_pseudogene	OTTMUSG00000002279.1	OTTMUST00000004525.1	1	PGO:0000004	---	Rpl18-ps1-201		processed_pseudogene
TetK27	chr1	60906488	60918303	11815	60909363	193	278.717	52.4839	275.045	TetK27_peak_760	Ctla4	ENSMUST00000097720.3	+	60909171	60914770	TSS	0	0	1.000000	0.473934	CCDS69893.1	ENSMUSG00000026011.13	Ctla4	protein_coding	OTTMUSG00000002278.1	OTTMUST00000004536.1	2	---	ENSMUSP00000095327.3	Ctla4-202	5	protein_coding
TetK27	chr1	60920082	60921160	1078	60920932	25	16.5309	7.03392	14.4964	TetK27_peak_761	.	.	.	.	.	Intergenic	.	.	.	.	.	.	.	.	.	.	.	.	.	.	.	.
TetK27	chr1	60921282	60921630	348	60921441	15	7.52498	4.32857	5.65872	TetK27_peak_762	.	.	.	.	.	Intergenic	.	.	.	.	.	.	.	.	.	.	.	.	.	.	.	.
TetK27	chr1	60924103	60925762	1659	60924922	19	7.47473	3.76862	5.62408	TetK27_peak_763	.	.	.	.	.	Intergenic	.	.	.	.	.	.	.	.	.	.	.	.	.	.	.	.
TetK27	chr1	60927804	60928169	365	60927934	12	5.2738	3.51696	3.47795	TetK27_peak_764	.	.	.	.	.	Intergenic	.	.	.	.	.	.	.	.	.	.	.	.	.	.	.	.
TetK27	chr1	60928444	60928825	381	60928673	25	16.5309	7.03392	14.4964	TetK27_peak_765	.	.	.	.	.	Intergenic	.	.	.	.	.	.	.	.	.	.	.	.	.	.	.	.
TetK27	chr1	60929050	60931479	2429	60930613	52	47.9484	14.3384	45.6112	TetK27_peak_766	.	.	.	.	.	Intergenic	.	.	.	.	.	.	.	.	.	.	.	.	.	.	.	.
TetK27	chr1	60932174	60932557	383	60932287	14	6.74667	4.05803	4.90229	TetK27_peak_767	.	.	.	.	.	Intergenic	.	.	.	.	.	.	.	.	.	.	.	.	.	.	.	.
TetK27	chr1	60932673	60933008	335	60932878	16	8.32904	4.5991	6.44257	TetK27_peak_768	.	.	.	.	.	Intergenic	.	.	.	.	.	.	.	.	.	.	.	.	.	.	.	.
TetK27	chr1	60933378	60933919	541	60933615	19	10.8823	5.41071	8.93972	TetK27_peak_769	.	.	.	.	.	Intergenic	.	.	.	.	.	.	.	.	.	.	.	.	.	.	.	.
TetK27	chr1	60935329	60942876	7547	60937439	128	153.397	30.4948	150.453	TetK27_peak_770	.	.	.	.	.	Intergenic	.	.	.	.	.	.	.	.	.	.	.	.	.	.	.	.
TetK27	chr1	60942969	60943491	522	60943304	18	10.0089	5.14017	8.08393	TetK27_peak_771	.	.	.	.	.	Intergenic	.	.	.	.	.	.	.	.	.	.	.	.	.	.	.	.
TetK27	chr1	60943568	60943819	251	60943767	12	5.2738	3.51696	3.47795	TetK27_peak_772	.	.	.	.	.	Intergenic	.	.	.	.	.	.	.	.	.	.	.	.	.	.	.	.
TetK27	chr1	60944134	60944408	274	60944233	14	6.74667	4.05803	4.90229	TetK27_peak_773	.	.	.	.	.	Intergenic	.	.	.	.	.	.	.	.	.	.	.	.	.	.	.	.
TetK27	chr1	60947066	60947317	251	60947144	14	6.74667	4.05803	4.90229	TetK27_peak_774	.	.	.	.	.	Intergenic	.	.	.	.	.	.	.	.	.	.	.	.	.	.	.	.
TetK27	chr1	60952964	60953392	428	60953194	21	12.6908	5.95178	10.7156	TetK27_peak_775	.	.	.	.	.	Intergenic	.	.	.	.	.	.	.	.	.	.	.	.	.	.	.	.
TetK27	chr1	60953981	60954375	394	60954219	14	6.74667	4.05803	4.90229	TetK27_peak_776	.	.	.	.	.	Intergenic	.	.	.	.	.	.	.	.	.	.	.	.	.	.	.	.
TetK27	chr1	60972528	60972950	422	60972704	13	5.99569	3.7875	4.17465	TetK27_peak_777	.	.	.	.	.	Intergenic	.	.	.	.	.	.	.	.	.	.	.	.	.	.	.	.
TetK27	chr1	60973308	60976225	2917	60974271	141	185.423	38.416	182.313	TetK27_peak_778	.	.	.	.	.	Intergenic	.	.	.	.	.	.	.	.	.	.	.	.	.	.	.	.
TetK27	chr1	60976309	60976633	324	60976410	14	6.74667	4.05803	4.90229	TetK27_peak_779	.	.	.	.	.	Intergenic	.	.	.	.	.	.	.	.	.	.	.	.	.	.	.	.
TetK27	chr1	60977233	60982374	5141	60978179	92	105.159	25.1598	102.47	TetK27_peak_780	Icos	ENSMUST00000027162.11	+	60977927	60995798	TSS	0	-13424	0.248881	0.865033	---	ENSMUSG00000026009.14	Icos	protein_coding	OTTMUSG00000002307.1	OTTMUST00000004596.1	2	---	ENSMUSP00000027162.5	Icos-201	1	protein_coding
TetK27	chr1	60982895	60983316	421	60983105	17	9.15743	4.86964	7.25158	TetK27_peak_781	Icos	ENSMUST00000027162.11	+	60977927	60995798	Intron 1	4968	-12482	0.023612	1.000000	---	ENSMUSG00000026009.14	Icos	protein_coding	OTTMUSG00000002307.1	OTTMUST00000004596.1	2	---	ENSMUSP00000027162.5	Icos-201	1	protein_coding
TetK27	chr1	60984827	60985543	716	60985341	24	15.5448	6.76339	13.5242	TetK27_peak_782	Icos	ENSMUST00000027162.11	+	60977927	60995798	Intron 1	6900	-10255	0.040119	1.000000	---	ENSMUSG00000026009.14	Icos	protein_coding	OTTMUSG00000002307.1	OTTMUST00000004596.1	2	---	ENSMUSP00000027162.5	Icos-201	1	protein_coding
TetK27	chr1	60985861	60986357	496	60986082	20	11.7766	5.68125	9.81736	TetK27_peak_783	Icos	ENSMUST00000027162.11	+	60977927	60995798	Intron 1	7934	-9441	0.027809	1.000000	---	ENSMUSG00000026009.14	Icos	protein_coding	OTTMUSG00000002307.1	OTTMUST00000004596.1	2	---	ENSMUSP00000027162.5	Icos-201	1	protein_coding
TetK27	chr1	60986493	60986786	293	60986635	19	9.53241	4.72787	7.62311	TetK27_peak_784	Icos	ENSMUST00000027162.11	+	60977927	60995798	Intron 1	8566	-9012	0.016450	1.000000	---	ENSMUSG00000026009.14	Icos	protein_coding	OTTMUSG00000002307.1	OTTMUST00000004596.1	2	---	ENSMUSP00000027162.5	Icos-201	1	protein_coding
TetK27	chr1	60988985	60989577	592	60989103	14	6.74667	4.05803	4.90229	TetK27_peak_785	Gm37039	ENSMUST00000193733.1	+	60989479	60991964	TSS	0	-2387	0.039823	0.166948	---	ENSMUSG00000102561.1	Gm37039	TEC	OTTMUSG00000047381.1	OTTMUST00000122408.1	2	---	---	Gm37039-201		TEC
TetK27	chr1	60989757	60991172	1415	60990178	48	42.8229	13.2562	40.5251	TetK27_peak_786	Gm37039	ENSMUST00000193733.1	+	60989479	60991964	TTS	278	-792	0.569590	1.000000	---	ENSMUSG00000102561.1	Gm37039	TEC	OTTMUSG00000047381.1	OTTMUST00000122408.1	2	---	---	Gm37039-201		TEC
TetK27	chr1	60991295	60992161	866	60991946	18	9.99233	5.13149	8.07998	TetK27_peak_787	Gm37039	ENSMUST00000193733.1	+	60989479	60991964	TTS	1816	0	0.269509	0.772780	---	ENSMUSG00000102561.1	Gm37039	TEC	OTTMUSG00000047381.1	OTTMUST00000122408.1	2	---	---	Gm37039-201		TEC
TetK27	chr1	60996085	60996639	554	60996402	14	4.99608	3.14557	3.22361	TetK27_peak_788	Icos	ENSMUST00000102827.3	+	60977927	61000321	Intron 4	18158	-3682	0.024782	1.000000	CCDS14994.1	ENSMUSG00000026009.14	Icos	protein_coding	OTTMUSG00000002307.1	OTTMUST00000004595.1	2	---	ENSMUSP00000099891.3	Icos-202	1	protein_coding
TetK27	chr1	60996708	60997387	679	60997032	17	9.15743	4.86964	7.25158	TetK27_peak_789	Icos	ENSMUST00000102827.3	+	60977927	61000321	Intron 4	18781	-2934	0.030364	1.000000	CCDS14994.1	ENSMUSG00000026009.14	Icos	protein_coding	OTTMUSG00000002307.1	OTTMUST00000004595.1	2	---	ENSMUSP00000099891.3	Icos-202	1	protein_coding
TetK27	chr1	60998681	60998957	276	60998866	13	5.99569	3.7875	4.17465	TetK27_peak_790	Icos	ENSMUST00000102827.3	+	60977927	61000321	3' UTR Exon	20754	-1364	0.012369	1.000000	CCDS14994.1	ENSMUSG00000026009.14	Icos	protein_coding	OTTMUSG00000002307.1	OTTMUST00000004595.1	2	---	ENSMUSP00000099891.3	Icos-202	1	protein_coding
TetK27	chr1	60999688	61000052	364	60999930	12	5.2738	3.51696	3.47795	TetK27_peak_791	Icos	ENSMUST00000102827.3	+	60977927	61000321	TTS	21761	-269	0.016298	1.000000	CCDS14994.1	ENSMUSG00000026009.14	Icos	protein_coding	OTTMUSG00000002307.1	OTTMUST00000004595.1	2	---	ENSMUSP00000099891.3	Icos-202	1	protein_coding
TetK27	chr1	61016558	61017848	1290	61016886	34	26.0742	9.46874	23.926	TetK27_peak_792	.	.	.	.	.	Intergenic	.	.	.	.	.	.	.	.	.	.	.	.	.	.	.	.
TetK27	chr1	61022300	61023462	1162	61022918	19	8.4142	4.1941	6.52664	TetK27_peak_793	.	.	.	.	.	Intergenic	.	.	.	.	.	.	.	.	.	.	.	.	.	.	.	.
TetK27	chr1	61024184	61025535	1351	61024720	19	10.8823	5.41071	8.93972	TetK27_peak_794	.	.	.	.	.	Intergenic	.	.	.	.	.	.	.	.	.	.	.	.	.	.	.	.
TetK27	chr1	61025771	61028277	2506	61027479	73	76.7969	20.0196	74.2689	TetK27_peak_795	.	.	.	.	.	Intergenic	.	.	.	.	.	.	.	.	.	.	.	.	.	.	.	.
TetK27	chr1	61028680	61030753	2073	61029987	32	23.8582	8.92767	21.733	TetK27_peak_796	.	.	.	.	.	Intergenic	.	.	.	.	.	.	.	.	.	.	.	.	.	.	.	.
TetK27	chr1	61030927	61031648	721	61031408	22	9.61192	4.33391	7.70213	TetK27_peak_797	.	.	.	.	.	Intergenic	.	.	.	.	.	.	.	.	.	.	.	.	.	.	.	.
TetK27	chr1	61033667	61034058	391	61033890	18	10.0089	5.14017	8.08393	TetK27_peak_798	.	.	.	.	.	Intergenic	.	.	.	.	.	.	.	.	.	.	.	.	.	.	.	.
TetK27	chr1	61034247	61036520	2273	61035791	81	88.5097	22.1839	85.9127	TetK27_peak_799	.	.	.	.	.	Intergenic	.	.	.	.	.	.	.	.	.	.	.	.	.	.	.	.
TetK27	chr1	61045570	61046128	558	61045879	51	39.5499	10.9047	37.2803	TetK27_peak_800	.	.	.	.	.	Intergenic	.	.	.	.	.	.	.	.	.	.	.	.	.	.	.	.
TetK27	chr1	61046278	61046911	633	61046526	48	36.154	10.2755	33.9145	TetK27_peak_801	.	.	.	.	.	Intergenic	.	.	.	.	.	.	.	.	.	.	.	.	.	.	.	.
TetK27	chr1	61049890	61051161	1271	61050719	34	26.0742	9.46874	23.926	TetK27_peak_802	.	.	.	.	.	Intergenic	.	.	.	.	.	.	.	.	.	.	.	.	.	.	.	.
TetK27	chr1	61135321	61137183	1862	61136105	63	57.8932	15.1292	55.4883	TetK27_peak_803	.	.	.	.	.	Intergenic	.	.	.	.	.	.	.	.	.	.	.	.	.	.	.	.
TetK27	chr1	61137497	61138372	875	61137950	39	31.822	10.8214	29.6171	TetK27_peak_804	.	.	.	.	.	Intergenic	.	.	.	.	.	.	.	.	.	.	.	.	.	.	.	.
TetK27	chr1	61139182	61139978	796	61139754	26	17.5331	7.30446	15.4838	TetK27_peak_805	.	.	.	.	.	Intergenic	.	.	.	.	.	.	.	.	.	.	.	.	.	.	.	.
TetK27	chr1	61181311	61181814	503	61181583	24	15.5448	6.76339	13.5242	TetK27_peak_806	.	.	.	.	.	Intergenic	.	.	.	.	.	.	.	.	.	.	.	.	.	.	.	.
TetK27	chr1	62200659	62201142	483	62200884	25	16.5309	7.03392	14.4964	TetK27_peak_807	Pard3b	ENSMUST00000046673.10	+	61639243	62637924	Intron 10	561416	-436782	0.000485	1.000000	---	ENSMUSG00000052062.14	Pard3b	protein_coding	OTTMUSG00000002383.1	OTTMUST00000004897.1	2	---	ENSMUSP00000040439.4	Pard3b-201	5	protein_coding
TetK27	chr1	62201229	62202246	1017	62201536	28	19.5842	7.84553	17.5081	TetK27_peak_808	Pard3b	ENSMUST00000046673.10	+	61639243	62637924	Intron 10	561986	-435678	0.001019	1.000000	---	ENSMUSG00000052062.14	Pard3b	protein_coding	OTTMUSG00000002383.1	OTTMUST00000004897.1	2	---	ENSMUSP00000040439.4	Pard3b-201	5	protein_coding
TetK27	chr1	62875861	62876123	262	62876024	15	7.52498	4.32857	5.65872	TetK27_peak_809	.	.	.	.	.	Intergenic	.	.	.	.	.	.	.	.	.	.	.	.	.	.	.	.
TetK27	chr1	63048088	63048435	347	63048241	24	15.5448	6.76339	13.5242	TetK27_peak_810	Ino80d	ENSMUST00000165066.7	-	63047801	63114268	TTS	65833	-287	0.005236	1.000000	CCDS48277.1	ENSMUSG00000040865.15	Ino80d	protein_coding	OTTMUSG00000002593.1	---	3	---	ENSMUSP00000130864.1	Ino80d-205	5	protein_coding
TetK27	chr1	63095960	63096211	251	63095998	12	5.2738	3.51696	3.47795	TetK27_peak_811	Ino80d	ENSMUST00000153992.1	-	63062164	63114256	5' UTR Exon	18045	-33796	0.004838	1.000000	---	ENSMUSG00000040865.15	Ino80d	protein_coding	OTTMUSG00000002593.1	OTTMUST00000005043.1	2	---	ENSMUSP00000115332.1	Ino80d-204	1	protein_coding
TetK27	chr1	63107609	63107862	253	63107771	15	6.48548	3.7823	4.65898	TetK27_peak_812	Ino80d	ENSMUST00000153992.1	-	63062164	63114256	5' UTR Exon	6394	-45445	0.004876	1.000000	---	ENSMUSG00000040865.15	Ino80d	protein_coding	OTTMUSG00000002593.1	OTTMUST00000005043.1	2	---	ENSMUSP00000115332.1	Ino80d-204	1	protein_coding
TetK27	chr1	63112201	63116432	4231	63113789	184	262.085	50.0491	258.526	TetK27_peak_813	Ino80d	ENSMUST00000172416.7	-	63047801	63114268	TSS	0	-64400	0.031113	0.488658	CCDS35594.1	ENSMUSG00000040865.15	Ino80d	protein_coding	OTTMUSG00000002593.1	---	3	---	ENSMUSP00000127378.1	Ino80d-206	5	protein_coding
TetK27	chr1	63120169	63120513	344	63120391	12	5.2738	3.51696	3.47795	TetK27_peak_814	Gm20342	ENSMUST00000185480.1	+	63117118	63126838	CDS Exon 1	3051	-6325	0.035490	1.000000	---	ENSMUSG00000101599.1	Gm20342	lincRNA	OTTMUSG00000047511.1	OTTMUST00000122580.1	2	---	---	Gm20342-201		lincRNA
TetK27	chr1	63129591	63130562	971	63130266	18	8.73676	4.49148	6.84645	TetK27_peak_815	Ino80dos	ENSMUST00000188602.1	+	63114740	63157246	Intron 1	14851	-26684	0.022867	1.000000	---	ENSMUSG00000084799.7	Ino80dos	lincRNA	OTTMUSG00000002611.1	OTTMUST00000122579.1	2	---	---	Ino80dos-204	2	lincRNA
TetK27	chr1	63175379	63178187	2808	63176969	180	237.326	41.3404	233.924	TetK27_peak_816	Eef1b2	ENSMUST00000174890.8	+	63177185	63178880	TSS	0	-693	0.591392	0.357067	---	ENSMUSG00000025967.16	Eef1b2	protein_coding	OTTMUSG00000002614.1	OTTMUST00000095759.1	2	---	ENSMUSP00000133545.1	Eef1b2-208	5	nonsense_mediated_decay
TetK27	chr1	63730075	63731127	1052	63730753	74	73.7899	18.2569	71.2852	TetK27_peak_817	Mdh1b	ENSMUST00000114094.2	-	63698819	63730319	TSS	0	-31256	0.007778	0.232669	CCDS15000.2	ENSMUSG00000025963.5	Mdh1b	protein_coding	OTTMUSG00000008270.1	OTTMUST00000018792.1	2	---	ENSMUSP00000109728.2	Mdh1b-201	1	protein_coding
TetK27	chr1	64000539	64001028	489	64000841	21	12.6908	5.95178	10.7156	TetK27_peak_818	.	.	.	.	.	Intergenic	.	.	.	.	.	.	.	.	.	.	.	.	.	.	.	.
TetK27	chr1	64108540	64108797	257	64108680	13	5.11059	3.30951	3.33512	TetK27_peak_819	Klf7	ENSMUST00000135075.1	-	64079103	64122283	Intron 2	13486	-29437	0.005975	1.000000	---	ENSMUSG00000025959.13	Klf7	protein_coding	OTTMUSG00000013919.1	OTTMUST00000033150.1	2	---	ENSMUSP00000120537.1	Klf7-203	2	protein_coding
TetK27	chr1	64117763	64118169	406	64117939	19	9.53241	4.72787	7.62311	TetK27_peak_820	Klf7	ENSMUST00000135075.1	-	64079103	64122283	Intron 2	4114	-38660	0.009425	1.000000	---	ENSMUSG00000025959.13	Klf7	protein_coding	OTTMUSG00000013919.1	OTTMUST00000033150.1	2	---	ENSMUSP00000120537.1	Klf7-203	2	protein_coding
TetK27	chr1	64118248	64118671	423	64118465	19	10.4964	5.21137	8.56813	TetK27_peak_821	Klf7	ENSMUST00000135075.1	-	64079103	64122283	Intron 2	3612	-39145	0.009819	1.000000	---	ENSMUSG00000025959.13	Klf7	protein_coding	OTTMUSG00000013919.1	OTTMUST00000033150.1	2	---	ENSMUSP00000120537.1	Klf7-203	2	protein_coding
TetK27	chr1	64118733	64119022	289	64118900	19	5.97614	3.13297	4.17363	TetK27_peak_822	Klf7	ENSMUST00000135075.1	-	64079103	64122283	Intron 2	3261	-39630	0.006716	1.000000	---	ENSMUSG00000025959.13	Klf7	protein_coding	OTTMUSG00000013919.1	OTTMUST00000033150.1	2	---	ENSMUSP00000120537.1	Klf7-203	2	protein_coding
TetK27	chr1	64119205	64119835	630	64119349	14	6.74667	4.05803	4.90229	TetK27_peak_823	Klf7	ENSMUST00000135075.1	-	64079103	64122283	Intron 2	2448	-40102	0.014613	1.000000	---	ENSMUSG00000025959.13	Klf7	protein_coding	OTTMUSG00000013919.1	OTTMUST00000033150.1	2	---	ENSMUSP00000120537.1	Klf7-203	2	protein_coding
TetK27	chr1	64119905	64122887	2982	64121973	357	486.507	51.7184	480.595	TetK27_peak_824	Klf7	ENSMUST00000135075.1	-	64079103	64122283	TSS	0	-40802	0.055094	0.797519	---	ENSMUSG00000025959.13	Klf7	protein_coding	OTTMUSG00000013919.1	OTTMUST00000033150.1	2	---	ENSMUSP00000120537.1	Klf7-203	2	protein_coding
TetK27	chr1	64302584	64303095	511	64302882	29	20.6319	8.11607	18.5431	TetK27_peak_825	Gm28981	ENSMUST00000190863.1	-	64185991	64303044	TSS	0	-116593	0.003938	0.900391	---	ENSMUSG00000101895.1	Gm28981	lincRNA	OTTMUSG00000047614.1	OTTMUST00000122759.1	2	---	---	Gm28981-201	1	lincRNA
TetK27	chr1	64303152	64303517	365	64303296	21	12.6908	5.95178	10.7156	TetK27_peak_826	Gm28981	ENSMUST00000190863.1	-	64185991	64303044	TSS	-108	-117161	0.000000	0.000000	---	ENSMUSG00000101895.1	Gm28981	lincRNA	OTTMUSG00000047614.1	OTTMUST00000122759.1	2	---	---	Gm28981-201	1	lincRNA
TetK27	chr1	64305764	64306069	305	64305910	16	8.32904	4.5991	6.44257	TetK27_peak_827	.	.	.	.	.	Intergenic	.	.	.	.	.	.	.	.	.	.	.	.	.	.	.	.
TetK27	chr1	64526675	64528816	2141	64528018	36	21.4928	6.97195	19.4011	TetK27_peak_828	.	.	.	.	.	Intergenic	.	.	.	.	.	.	.	.	.	.	.	.	.	.	.	.
TetK27	chr1	64529353	64535387	6034	64533121	307	371.663	37.1214	367.196	TetK27_peak_829	Creb1	ENSMUST00000190348.1	+	64532894	64597478	TSS	0	-62091	0.038616	0.413256	CCDS15004.1	ENSMUSG00000025958.14	Creb1	protein_coding	OTTMUSG00000047617.1	OTTMUST00000122770.1	2	---	ENSMUSP00000140112.1	Creb1-209	1	protein_coding
TetK27	chr1	64535733	64535999	266	64535813	12	5.2738	3.51696	3.47795	TetK27_peak_830	Creb1	ENSMUST00000190348.1	+	64532894	64597478	5' UTR Exon	2839	-61479	0.004134	1.000000	CCDS15004.1	ENSMUSG00000025958.14	Creb1	protein_coding	OTTMUSG00000047617.1	OTTMUST00000122770.1	2	---	ENSMUSP00000140112.1	Creb1-209	1	protein_coding
TetK27	chr1	64542501	64542752	251	64542651	15	7.52498	4.32857	5.65872	TetK27_peak_831	Creb1	ENSMUST00000190348.1	+	64532894	64597478	5' UTR Exon	9607	-54726	0.003902	1.000000	CCDS15004.1	ENSMUSG00000025958.14	Creb1	protein_coding	OTTMUSG00000047617.1	OTTMUST00000122770.1	2	---	ENSMUSP00000140112.1	Creb1-209	1	protein_coding
TetK27	chr1	64601341	64601890	549	64601648	11	3.85142	2.83672	2.13865	TetK27_peak_832	Creb1	ENSMUST00000049932.11	+	64532809	64601258	TTS	68532	83	0.000000	0.000000	CCDS15004.1	ENSMUSG00000025958.14	Creb1	protein_coding	OTTMUSG00000047617.1	OTTMUST00000122766.1	2	---	ENSMUSP00000059973.5	Creb1-201	5	protein_coding
TetK27	chr1	64603437	64604086	649	64603901	15	6.48548	3.7823	4.65898	TetK27_peak_833	Creb1	ENSMUST00000087366.10	+	64532819	64604549	TTS	70618	-463	0.009062	1.000000	CCDS15005.1	ENSMUSG00000025958.14	Creb1	protein_coding	OTTMUSG00000047617.1	OTTMUST00000122767.1	2	---	ENSMUSP00000084624.4	Creb1-202	1	protein_coding
TetK27	chr1	64614708	64618624	3916	64617541	212	251.61	33.3661	248.118	TetK27_peak_834	Gm28982	ENSMUST00000186895.1	+	64617784	64626034	TSS	0	-7410	0.101927	0.214705	---	ENSMUSG00000101832.1	Gm28982	lincRNA	OTTMUSG00000047619.1	OTTMUST00000122774.1	2	---	---	Gm28982-201	3	lincRNA
TetK27	chr1	64688190	64688538	348	64688375	14	6.74667	4.05803	4.90229	TetK27_peak_835	2810408I11Rik	ENSMUST00000122813.1	-	64683348	64690609	Intron 2	2071	-4842	0.048058	1.000000	---	ENSMUSG00000087213.2	2810408I11Rik	processed_transcript	OTTMUSG00000021537.1	OTTMUST00000051076.1	2	---	---	2810408I11Rik-201	2	antisense_RNA
TetK27	chr1	64690018	64691685	1667	64691200	148	105.737	11.6006	103.045	TetK27_peak_836	2810408I11Rik	ENSMUST00000122813.1	-	64683348	64690609	TSS	0	-6670	0.081520	0.354916	---	ENSMUSG00000087213.2	2810408I11Rik	processed_transcript	OTTMUSG00000021537.1	OTTMUST00000051076.1	2	---	---	2810408I11Rik-201	2	antisense_RNA
TetK27	chr1	64735820	64737784	1964	64737564	77	54.6221	10.4551	52.2383	TetK27_peak_837	Fzd5	ENSMUST00000116133.3	-	64734469	64737750	TSS	0	-1351	0.588361	0.982697	CCDS15008.1	ENSMUSG00000045005.9	Fzd5	protein_coding	OTTMUSG00000047622.1	OTTMUST00000122781.1	2	---	ENSMUSP00000111828.2	Fzd5-202	1	protein_coding
TetK27	chr1	64737903	64738297	394	64738056	26	16.5037	6.79606	14.4788	TetK27_peak_838	Fzd5	ENSMUST00000116133.3	-	64734469	64737750	TSS	-153	-3434	0.000000	0.000000	CCDS15008.1	ENSMUSG00000045005.9	Fzd5	protein_coding	OTTMUSG00000047622.1	OTTMUST00000122781.1	2	---	ENSMUSP00000111828.2	Fzd5-202	1	protein_coding
TetK27	chr1	64956323	64957566	1243	64956676	83	67.4191	13.1585	64.9517	TetK27_peak_839	Plekhm3	ENSMUST00000097713.1	-	64789121	64956825	TSS	0	-167202	0.002999	0.404341	CCDS15009.1	ENSMUSG00000051344.13	Plekhm3	protein_coding	OTTMUSG00000021993.1	OTTMUST00000052216.1	2	---	ENSMUSP00000095320.1	Plekhm3-201	1	protein_coding
TetK27	chr1	64970789	64971247	458	64971038	24	15.5223	6.75196	13.5116	TetK27_peak_840	.	.	.	.	.	Intergenic	.	.	.	.	.	.	.	.	.	.	.	.	.	.	.	.
TetK27	chr1	64994267	64994625	358	64994556	19	7.47473	3.76862	5.62408	TetK27_peak_841	Rpl10a-ps1	ENSMUST00000120360.1	-	64993951	64994605	TSS	0	-316	0.517557	0.944290	---	ENSMUSG00000084416.3	Rpl10a-ps1	processed_pseudogene	OTTMUSG00000022086.1	OTTMUST00000052439.1	2	PGO:0000004	---	Rpl10a-ps1-201		processed_pseudogene
TetK27	chr1	65177995	65179588	1593	65178920	85	94.4946	23.266	91.8643	TetK27_peak_842	Idh1	ENSMUST00000097709.10	-	65158616	65179182	TSS	0	-19379	0.057762	0.745295	CCDS15016.1	ENSMUSG00000025950.16	Idh1	protein_coding	OTTMUSG00000021898.1	OTTMUST00000052006.1	2	---	ENSMUSP00000095316.4	Idh1-201	1	protein_coding
TetK27	chr1	65186224	65187394	1170	65186872	160	218.688	43.5562	215.395	TetK27_peak_843	Pikfyve	ENSMUST00000186404.6	+	65186704	65233285	TSS	0	-45891	0.014834	0.590094	---	ENSMUSG00000025949.16	Pikfyve	protein_coding	OTTMUSG00000047694.1	OTTMUST00000122902.1	2	---	---	Pikfyve-205	5	retained_intron
TetK27	chr1	66279527	66279981	454	66279772	26	17.5331	7.30446	15.4838	TetK27_peak_844	Map2	ENSMUST00000114017.7	+	66175313	66442029	5' UTR Exon	104214	-162048	0.001706	1.000000	CCDS15020.1	ENSMUSG00000015222.17	Map2	protein_coding	OTTMUSG00000016448.1	OTTMUST00000039628.1	2	---	ENSMUSP00000109650.1	Map2-206	1	protein_coding
TetK27	chr1	66700701	66701655	954	66701117	149	163.573	26.1798	160.577	TetK27_peak_845	Rpe	ENSMUST00000027157.9	+	66700831	66719806	TSS	0	-18151	0.043476	0.863874	CCDS15022.1	ENSMUSG00000026005.15	Rpe	protein_coding	OTTMUSG00000021851.1	OTTMUST00000051848.1	2	---	ENSMUSP00000027157.3	Rpe-201	1	protein_coding
TetK27	chr1	66813961	66814214	253	66814107	14	6.74667	4.05803	4.90229	TetK27_peak_846	Gm37755	ENSMUST00000195880.1	+	66812315	66814494	TTS	1646	-280	0.116514	1.000000	---	ENSMUSG00000103382.1	Gm37755	TEC	OTTMUSG00000047113.1	OTTMUST00000121925.1	2	---	---	Gm37755-201		TEC
TetK27	chr1	66814452	66818368	3916	66817371	215	276.881	40.7011	273.223	TetK27_peak_847	Kansl1l	ENSMUST00000189846.1	-	66800742	66817547	TSS	0	-13710	0.184220	0.790401	---	ENSMUSG00000026004.15	Kansl1l	protein_coding	OTTMUSG00000025009.1	OTTMUST00000121918.1	2	---	---	Kansl1l-205	1	retained_intron
TetK27	chr1	66838155	66838736	581	66838533	25	16.5309	7.03392	14.4964	TetK27_peak_848	Acadl	ENSMUST00000027153.5	-	66830839	66863278	CDS Exon 9	24542	-7316	0.017941	1.000000	CCDS15023.1	ENSMUSG00000026003.5	Acadl	protein_coding	OTTMUSG00000026221.1	OTTMUST00000064849.1	2	---	ENSMUSP00000027153.5	Acadl-201	1	protein_coding
TetK27	chr1	66862551	66863612	1061	66863162	92	85.5967	17.035	83.0169	TetK27_peak_849	Acadl	ENSMUST00000027153.5	-	66830839	66863278	TSS	0	-31712	0.022441	0.685499	CCDS15023.1	ENSMUSG00000026003.5	Acadl	protein_coding	OTTMUSG00000026221.1	OTTMUST00000064849.1	2	---	ENSMUSP00000027153.5	Acadl-201	1	protein_coding
TetK27	chr1	67038187	67039545	1358	67038650	123	154.923	33.5464	151.971	TetK27_peak_850	Lancl1	ENSMUST00000113979.9	-	67000517	67038873	TSS	0	-37670	0.017911	0.505519	CCDS15025.1	ENSMUSG00000026000.16	Lancl1	protein_coding	OTTMUSG00000021584.1	OTTMUST00000051237.1	2	---	ENSMUSP00000109612.3	Lancl1-202	1	protein_coding
TetK27	chr1	69241872	69242358	486	69242108	37	29.4889	10.2804	27.3063	TetK27_peak_851	.	.	.	.	.	Intergenic	.	.	.	.	.	.	.	.	.	.	.	.	.	.	.	.
TetK27	chr1	69290698	69291907	1209	69291395	36	28.339	10.0098	26.168	TetK27_peak_852	.	.	.	.	.	Intergenic	.	.	.	.	.	.	.	.	.	.	.	.	.	.	.	.
TetK27	chr1	69466934	69467228	294	69467026	13	5.99569	3.7875	4.17465	TetK27_peak_853	.	.	.	.	.	Intergenic	.	.	.	.	.	.	.	.	.	.	.	.	.	.	.	.
TetK27	chr1	69468694	69470309	1615	69469713	30	21.6938	8.3866	19.5925	TetK27_peak_854	.	.	.	.	.	Intergenic	.	.	.	.	.	.	.	.	.	.	.	.	.	.	.	.
TetK27	chr1	69498131	69500036	1905	69499213	69	71.078	18.9375	68.5858	TetK27_peak_855	.	.	.	.	.	Intergenic	.	.	.	.	.	.	.	.	.	.	.	.	.	.	.	.
TetK27	chr1	69513484	69514147	663	69513674	16	7.21211	4.01869	5.36317	TetK27_peak_856	Gm29114	ENSMUST00000187100.1	+	69513932	69547708	TSS	0	-33561	0.006395	0.325301	---	ENSMUSG00000101156.1	Gm29114	antisense_RNA	OTTMUSG00000047131.1	OTTMUST00000121951.1	2	---	---	Gm29114-201	1	antisense_RNA
TetK27	chr1	69518267	69518594	327	69518393	15	7.52498	4.32857	5.65872	TetK27_peak_857	Gm29114	ENSMUST00000187100.1	+	69513932	69547708	Intron 1	4335	-29114	0.009711	1.000000	---	ENSMUSG00000101156.1	Gm29114	antisense_RNA	OTTMUSG00000047131.1	OTTMUST00000121951.1	2	---	---	Gm29114-201	1	antisense_RNA
TetK27	chr1	69527700	69527951	251	69527843	13	5.99569	3.7875	4.17465	TetK27_peak_858	Gm29114	ENSMUST00000187100.1	+	69513932	69547708	Intron 1	13768	-19757	0.007461	1.000000	---	ENSMUSG00000101156.1	Gm29114	antisense_RNA	OTTMUSG00000047131.1	OTTMUST00000121951.1	2	---	---	Gm29114-201	1	antisense_RNA
TetK27	chr1	69532552	69533597	1045	69532773	19	10.8823	5.41071	8.93972	TetK27_peak_859	Ikzf2	ENSMUST00000027146.8	-	69531214	69685822	3' UTR Exon	152225	-1338	0.006765	1.000000	CCDS15026.1	ENSMUSG00000025997.13	Ikzf2	protein_coding	OTTMUSG00000047132.1	OTTMUST00000121952.1	2	---	ENSMUSP00000027146.2	Ikzf2-201	1	protein_coding
TetK27	chr1	69534073	69534373	300	69534293	21	12.6908	5.95178	10.7156	TetK27_peak_860	Ikzf2	ENSMUST00000027146.8	-	69531214	69685822	3' UTR Exon	151449	-2859	0.001947	1.000000	CCDS15026.1	ENSMUSG00000025997.13	Ikzf2	protein_coding	OTTMUSG00000047132.1	OTTMUST00000121952.1	2	---	ENSMUSP00000027146.2	Ikzf2-201	1	protein_coding
TetK27	chr1	69534905	69551021	16116	69548446	124	156.589	33.8169	153.628	TetK27_peak_861	Ikzf2	ENSMUST00000187184.6	-	69538582	69687246	TTS	136225	0	0.083678	0.771856	---	ENSMUSG00000025997.13	Ikzf2	protein_coding	OTTMUSG00000047132.1	OTTMUST00000121954.1	1	---	ENSMUSP00000141075.1	Ikzf2-202	5	protein_coding
TetK27	chr1	69551351	69551758	407	69551585	19	10.8823	5.41071	8.93972	TetK27_peak_862	Ikzf2	ENSMUST00000190771.6	-	69538037	69685887	Intron 5	134129	-13314	0.002760	1.000000	---	ENSMUSG00000025997.13	Ikzf2	protein_coding	OTTMUSG00000047132.1	OTTMUST00000121953.1	2	---	ENSMUSP00000139543.1	Ikzf2-207	5	protein_coding
TetK27	chr1	69552105	69552558	453	69552349	18	10.0089	5.14017	8.08393	TetK27_peak_863	Ikzf2	ENSMUST00000190771.6	-	69538037	69685887	Intron 5	133329	-14068	0.003071	1.000000	---	ENSMUSG00000025997.13	Ikzf2	protein_coding	OTTMUSG00000047132.1	OTTMUST00000121953.1	2	---	ENSMUSP00000139543.1	Ikzf2-207	5	protein_coding
TetK27	chr1	69553175	69556705	3530	69554275	71	73.9255	19.4786	71.4153	TetK27_peak_864	Ikzf2	ENSMUST00000190771.6	-	69538037	69685887	Intron 5	129182	-15138	0.023882	1.000000	---	ENSMUSG00000025997.13	Ikzf2	protein_coding	OTTMUSG00000047132.1	OTTMUST00000121953.1	2	---	ENSMUSP00000139543.1	Ikzf2-207	5	protein_coding
TetK27	chr1	69557193	69557609	416	69557514	13	5.99569	3.7875	4.17465	TetK27_peak_865	Ikzf2	ENSMUST00000190771.6	-	69538037	69685887	Intron 5	128278	-19156	0.002820	1.000000	---	ENSMUSG00000025997.13	Ikzf2	protein_coding	OTTMUSG00000047132.1	OTTMUST00000121953.1	2	---	ENSMUSP00000139543.1	Ikzf2-207	5	protein_coding
TetK27	chr1	69557676	69557955	279	69557859	11	4.58302	3.24643	2.81413	TetK27_peak_866	Ikzf2	ENSMUST00000190771.6	-	69538037	69685887	Intron 5	127932	-19639	0.001894	1.000000	---	ENSMUSG00000025997.13	Ikzf2	protein_coding	OTTMUSG00000047132.1	OTTMUST00000121953.1	2	---	ENSMUSP00000139543.1	Ikzf2-207	5	protein_coding
TetK27	chr1	69559533	69559947	414	69559756	14	6.74667	4.05803	4.90229	TetK27_peak_867	Ikzf2	ENSMUST00000190771.6	-	69538037	69685887	Intron 5	125940	-21496	0.002807	1.000000	---	ENSMUSG00000025997.13	Ikzf2	protein_coding	OTTMUSG00000047132.1	OTTMUST00000121953.1	2	---	ENSMUSP00000139543.1	Ikzf2-207	5	protein_coding
TetK27	chr1	69589145	69589411	266	69589301	12	5.2738	3.51696	3.47795	TetK27_peak_868	Ikzf2	ENSMUST00000190771.6	-	69538037	69685887	Intron 3	96476	-51108	0.001806	1.000000	---	ENSMUSG00000025997.13	Ikzf2	protein_coding	OTTMUSG00000047132.1	OTTMUST00000121953.1	2	---	ENSMUSP00000139543.1	Ikzf2-207	5	protein_coding
TetK27	chr1	69627292	69627637	345	69627489	19	10.8823	5.41071	8.93972	TetK27_peak_869	Ikzf2	ENSMUST00000190771.6	-	69538037	69685887	Intron 3	58250	-89255	0.002340	1.000000	---	ENSMUSG00000025997.13	Ikzf2	protein_coding	OTTMUSG00000047132.1	OTTMUST00000121953.1	2	---	ENSMUSP00000139543.1	Ikzf2-207	5	protein_coding
TetK27	chr1	69629640	69629891	251	69629821	12	5.2738	3.51696	3.47795	TetK27_peak_870	Ikzf2	ENSMUST00000190771.6	-	69538037	69685887	Intron 3	55996	-91603	0.001704	1.000000	---	ENSMUSG00000025997.13	Ikzf2	protein_coding	OTTMUSG00000047132.1	OTTMUST00000121953.1	2	---	ENSMUSP00000139543.1	Ikzf2-207	5	protein_coding
TetK27	chr1	69637199	69637450	251	69637335	16	8.32904	4.5991	6.44257	TetK27_peak_871	Ikzf2	ENSMUST00000190771.6	-	69538037	69685887	Intron 3	48437	-99162	0.001704	1.000000	---	ENSMUSG00000025997.13	Ikzf2	protein_coding	OTTMUSG00000047132.1	OTTMUST00000121953.1	2	---	ENSMUSP00000139543.1	Ikzf2-207	5	protein_coding
TetK27	chr1	69637802	69639611	1809	69638555	34	26.0742	9.46874	23.926	TetK27_peak_872	Ikzf2	ENSMUST00000190771.6	-	69538037	69685887	Intron 3	46276	-99765	0.012242	1.000000	---	ENSMUSG00000025997.13	Ikzf2	protein_coding	OTTMUSG00000047132.1	OTTMUST00000121953.1	2	---	ENSMUSP00000139543.1	Ikzf2-207	5	protein_coding
TetK27	chr1	69641031	69641542	511	69641427	14	6.74667	4.05803	4.90229	TetK27_peak_873	Ikzf2	ENSMUST00000190771.6	-	69538037	69685887	Intron 3	44345	-102994	0.003463	1.000000	---	ENSMUSG00000025997.13	Ikzf2	protein_coding	OTTMUSG00000047132.1	OTTMUST00000121953.1	2	---	ENSMUSP00000139543.1	Ikzf2-207	5	protein_coding
TetK27	chr1	69641648	69642366	718	69642071	20	11.7766	5.68125	9.81736	TetK27_peak_874	Ikzf2	ENSMUST00000190771.6	-	69538037	69685887	Intron 3	43521	-103611	0.004863	1.000000	---	ENSMUSG00000025997.13	Ikzf2	protein_coding	OTTMUSG00000047132.1	OTTMUST00000121953.1	2	---	ENSMUSP00000139543.1	Ikzf2-207	5	protein_coding
TetK27	chr1	69643161	69643520	359	69643480	13	5.99569	3.7875	4.17465	TetK27_peak_875	Ikzf2	ENSMUST00000190771.6	-	69538037	69685887	Intron 3	42367	-105124	0.002435	1.000000	---	ENSMUSG00000025997.13	Ikzf2	protein_coding	OTTMUSG00000047132.1	OTTMUST00000121953.1	2	---	ENSMUSP00000139543.1	Ikzf2-207	5	protein_coding
TetK27	chr1	69644237	69645150	913	69644741	14	6.74667	4.05803	4.90229	TetK27_peak_876	Ikzf2	ENSMUST00000190771.6	-	69538037	69685887	Intron 3	40737	-106200	0.006182	1.000000	---	ENSMUSG00000025997.13	Ikzf2	protein_coding	OTTMUSG00000047132.1	OTTMUST00000121953.1	2	---	ENSMUSP00000139543.1	Ikzf2-207	5	protein_coding
TetK27	chr1	69647487	69648044	557	69647933	14	6.74667	4.05803	4.90229	TetK27_peak_877	Ikzf2	ENSMUST00000190771.6	-	69538037	69685887	Intron 3	37843	-109450	0.003774	1.000000	---	ENSMUSG00000025997.13	Ikzf2	protein_coding	OTTMUSG00000047132.1	OTTMUST00000121953.1	2	---	ENSMUSP00000139543.1	Ikzf2-207	5	protein_coding
TetK27	chr1	69649266	69649533	267	69649330	11	4.58302	3.24643	2.81413	TetK27_peak_878	Ikzf2	ENSMUST00000190771.6	-	69538037	69685887	Intron 3	36354	-111229	0.001813	1.000000	---	ENSMUSG00000025997.13	Ikzf2	protein_coding	OTTMUSG00000047132.1	OTTMUST00000121953.1	2	---	ENSMUSP00000139543.1	Ikzf2-207	5	protein_coding
TetK27	chr1	69649804	69650112	308	69650017	12	4.46559	3.07312	2.71949	TetK27_peak_879	Ikzf2	ENSMUST00000190771.6	-	69538037	69685887	Intron 3	35775	-111767	0.002090	1.000000	---	ENSMUSG00000025997.13	Ikzf2	protein_coding	OTTMUSG00000047132.1	OTTMUST00000121953.1	2	---	ENSMUSP00000139543.1	Ikzf2-207	5	protein_coding
TetK27	chr1	69653768	69654322	554	69654081	19	10.8823	5.41071	8.93972	TetK27_peak_880	Ikzf2	ENSMUST00000190771.6	-	69538037	69685887	Intron 3	31565	-115731	0.003754	1.000000	---	ENSMUSG00000025997.13	Ikzf2	protein_coding	OTTMUSG00000047132.1	OTTMUST00000121953.1	2	---	ENSMUSP00000139543.1	Ikzf2-207	5	protein_coding
TetK27	chr1	69654537	69654788	251	69654658	13	5.99569	3.7875	4.17465	TetK27_peak_881	Ikzf2	ENSMUST00000190771.6	-	69538037	69685887	Intron 3	31099	-116500	0.001704	1.000000	---	ENSMUSG00000025997.13	Ikzf2	protein_coding	OTTMUSG00000047132.1	OTTMUST00000121953.1	2	---	ENSMUSP00000139543.1	Ikzf2-207	5	protein_coding
TetK27	chr1	69654887	69655361	474	69655116	20	9.1644	4.4038	7.25768	TetK27_peak_882	Ikzf2	ENSMUST00000190771.6	-	69538037	69685887	Intron 3	30526	-116850	0.003213	1.000000	---	ENSMUSG00000025997.13	Ikzf2	protein_coding	OTTMUSG00000047132.1	OTTMUST00000121953.1	2	---	ENSMUSP00000139543.1	Ikzf2-207	5	protein_coding
TetK27	chr1	69655452	69656051	599	69655809	18	10.0089	5.14017	8.08393	TetK27_peak_883	Ikzf2	ENSMUST00000190771.6	-	69538037	69685887	Intron 3	29836	-117415	0.004058	1.000000	---	ENSMUSG00000025997.13	Ikzf2	protein_coding	OTTMUSG00000047132.1	OTTMUST00000121953.1	2	---	ENSMUSP00000139543.1	Ikzf2-207	5	protein_coding
TetK27	chr1	69656875	69657126	251	69656940	10	3.92564	2.97589	2.18676	TetK27_peak_884	Ikzf2	ENSMUST00000190771.6	-	69538037	69685887	Intron 3	28761	-118838	0.001704	1.000000	---	ENSMUSG00000025997.13	Ikzf2	protein_coding	OTTMUSG00000047132.1	OTTMUST00000121953.1	2	---	ENSMUSP00000139543.1	Ikzf2-207	5	protein_coding
TetK27	chr1	69657981	69658236	255	69658093	14	6.74667	4.05803	4.90229	TetK27_peak_885	Ikzf2	ENSMUST00000190771.6	-	69538037	69685887	Intron 3	27651	-119944	0.001731	1.000000	---	ENSMUSG00000025997.13	Ikzf2	protein_coding	OTTMUSG00000047132.1	OTTMUST00000121953.1	2	---	ENSMUSP00000139543.1	Ikzf2-207	5	protein_coding
TetK27	chr1	69670104	69670483	379	69670338	15	7.51141	4.32125	5.65872	TetK27_peak_886	Ikzf2	ENSMUST00000190771.6	-	69538037	69685887	Intron 3	15404	-132067	0.002570	1.000000	---	ENSMUSG00000025997.13	Ikzf2	protein_coding	OTTMUSG00000047132.1	OTTMUST00000121953.1	2	---	ENSMUSP00000139543.1	Ikzf2-207	5	protein_coding
TetK27	chr1	69670930	69671206	276	69671074	16	8.32904	4.5991	6.44257	TetK27_peak_887	Ikzf2	ENSMUST00000190771.6	-	69538037	69685887	Intron 3	14681	-132893	0.001874	1.000000	---	ENSMUSG00000025997.13	Ikzf2	protein_coding	OTTMUSG00000047132.1	OTTMUST00000121953.1	2	---	ENSMUSP00000139543.1	Ikzf2-207	5	protein_coding
TetK27	chr1	69677674	69677996	322	69677835	14	6.74667	4.05803	4.90229	TetK27_peak_888	Ikzf2	ENSMUST00000190771.6	-	69538037	69685887	Intron 3	7891	-139637	0.002185	1.000000	---	ENSMUSG00000025997.13	Ikzf2	protein_coding	OTTMUSG00000047132.1	OTTMUST00000121953.1	2	---	ENSMUSP00000139543.1	Ikzf2-207	5	protein_coding
TetK27	chr1	69678267	69678565	298	69678430	14	6.74667	4.05803	4.90229	TetK27_peak_889	Ikzf2	ENSMUST00000190771.6	-	69538037	69685887	Intron 3	7322	-140230	0.002022	1.000000	---	ENSMUSG00000025997.13	Ikzf2	protein_coding	OTTMUSG00000047132.1	OTTMUST00000121953.1	2	---	ENSMUSP00000139543.1	Ikzf2-207	5	protein_coding
TetK27	chr1	69679045	69681648	2603	69681307	30	21.6938	8.3866	19.5925	TetK27_peak_890	Ikzf2	ENSMUST00000187870.1	-	69681558	69684537	TTS	2889	0	0.030537	0.034946	---	ENSMUSG00000025997.13	Ikzf2	protein_coding	OTTMUSG00000047132.1	OTTMUST00000121960.1	2	---	---	Ikzf2-203	2	retained_intron
TetK27	chr1	69681798	69688622	6824	69687710	174	243.829	47.3437	240.387	TetK27_peak_891	Ikzf2	ENSMUST00000188919.1	-	69681559	69687141	TSS	0	-239	0.957191	0.783004	---	ENSMUSG00000025997.13	Ikzf2	protein_coding	OTTMUSG00000047132.1	OTTMUST00000121961.1	2	---	---	Ikzf2-205	2	retained_intron
TetK27	chr1	69688800	69689324	524	69689098	25	16.5309	7.03392	14.4964	TetK27_peak_892	.	.	.	.	.	Intergenic	.	.	.	.	.	.	.	.	.	.	.	.	.	.	.	.
TetK27	chr1	69759436	69760108	672	69759709	31	22.7693	8.65714	20.656	TetK27_peak_893	.	.	.	.	.	Intergenic	.	.	.	.	.	.	.	.	.	.	.	.	.	.	.	.
TetK27	chr1	69768487	69769544	1057	69769005	30	21.6938	8.3866	19.5925	TetK27_peak_894	.	.	.	.	.	Intergenic	.	.	.	.	.	.	.	.	.	.	.	.	.	.	.	.
TetK27	chr1	69811184	69811564	380	69811324	17	9.15743	4.86964	7.25158	TetK27_peak_895	.	.	.	.	.	Intergenic	.	.	.	.	.	.	.	.	.	.	.	.	.	.	.	.
TetK27	chr1	69830900	69831396	496	69831240	16	8.32904	4.5991	6.44257	TetK27_peak_896	Spag16	ENSMUST00000161131.2	+	69831740	69873761	TSS	-344	-42365	0.000000	0.000000	---	ENSMUSG00000053153.14	Spag16	protein_coding	OTTMUSG00000034211.1	OTTMUST00000086833.1	2	---	---	Spag16-203	1	processed_transcript
TetK27	chr1	71088828	71089490	662	71088963	22	13.6241	6.22232	11.6331	TetK27_peak_897	Bard1	ENSMUST00000027393.7	-	71027498	71103147	CDS Exon 2	13657	-61330	0.008764	1.000000	CCDS15029.1	ENSMUSG00000026196.7	Bard1	protein_coding	OTTMUSG00000030938.1	OTTMUST00000076570.1	2	---	ENSMUSP00000027393.7	Bard1-201	1	protein_coding
TetK27	chr1	71089619	71090061	442	71089840	14	6.74667	4.05803	4.90229	TetK27_peak_898	Bard1	ENSMUST00000027393.7	-	71027498	71103147	Intron 1	13086	-62121	0.005856	1.000000	CCDS15029.1	ENSMUSG00000026196.7	Bard1	protein_coding	OTTMUSG00000030938.1	OTTMUST00000076570.1	2	---	ENSMUSP00000027393.7	Bard1-201	1	protein_coding
TetK27	chr1	71099723	71104051	4328	71102359	191	227.061	32.8466	223.721	TetK27_peak_899	Bard1	ENSMUST00000027393.7	-	71027498	71103147	TSS	0	-72225	0.045274	0.791176	CCDS15029.1	ENSMUSG00000026196.7	Bard1	protein_coding	OTTMUSG00000030938.1	OTTMUST00000076570.1	2	---	ENSMUSP00000027393.7	Bard1-201	1	protein_coding
TetK27	chr1	71556450	71557939	1489	71557311	84	81.0916	17.8249	78.5414	TetK27_peak_900	Atic	ENSMUST00000136443.1	+	71557213	71563199	TSS	0	-5260	0.121430	0.487919	---	ENSMUSG00000026192.13	Atic	protein_coding	OTTMUSG00000033605.1	OTTMUST00000084661.1	2	---	---	Atic-202	1	retained_intron
TetK27	chr1	72211984	72212338	354	72212218	29	8.58616	3.30557	6.69799	TetK27_peak_901	Mreg	ENSMUST00000048860.8	-	72159442	72212308	TSS	0	-52542	0.006148	0.915493	CCDS15032.1	ENSMUSG00000039395.8	Mreg	protein_coding	OTTMUSG00000049069.1	OTTMUST00000125321.1	2	---	ENSMUSP00000041878.7	Mreg-201	1	protein_coding
TetK27	chr1	72225087	72226962	1875	72226111	77	82.6091	21.1018	80.0461	TetK27_peak_902	Gm25360	ENSMUST00000178786.1	+	72226240	72226431	TSS	0	0	1.000000	0.102345	---	ENSMUSG00000094655.1	Gm25360	snRNA	---	---	3	---	---	Gm25360-201		snRNA
TetK27	chr1	72236366	72237300	934	72236813	66	61.825	15.8384	59.3934	TetK27_peak_903	Gm23472	ENSMUST00000101806.2	+	72236946	72237137	TSS	0	0	1.000000	0.205348	---	ENSMUSG00000094050.1	Gm23472	snRNA	---	---	3	---	---	Gm23472-201		snRNA
TetK27	chr1	72243160	72244998	1838	72244079	235	311.297	44.4697	307.378	TetK27_peak_904	Gm24497	ENSMUST00000177868.1	+	72244213	72244404	TSS	0	0	1.000000	0.104405	---	ENSMUSG00000093956.1	Gm24497	snRNA	---	---	3	---	---	Gm24497-201		snRNA
TetK27	chr1	72254137	72254398	261	72254242	17	9.15743	4.86964	7.25158	TetK27_peak_905	Gm25939	ENSMUST00000179876.1	+	72255008	72255199	TSS	-610	-801	0.000000	0.000000	---	ENSMUSG00000093843.1	Gm25939	snRNA	---	---	3	---	---	Gm25939-201		snRNA
TetK27	chr1	72254521	72256437	1916	72254896	112	99.6076	16.3245	96.9493	TetK27_peak_906	Gm25939	ENSMUST00000179876.1	+	72255008	72255199	TSS	0	0	1.000000	0.100156	---	ENSMUSG00000093843.1	Gm25939	snRNA	---	---	3	---	---	Gm25939-201		snRNA
TetK27	chr1	72283866	72284643	777	72284108	43	28.3479	8.29097	26.1765	TetK27_peak_907	Pecr	ENSMUST00000027381.12	-	72259172	72284315	TSS	0	-24694	0.017897	0.578406	CCDS35607.1	ENSMUSG00000026189.13	Pecr	protein_coding	OTTMUSG00000026657.1	OTTMUST00000065967.1	2	---	ENSMUSP00000027381.6	Pecr-201	1	protein_coding
TetK27	chr1	72306786	72308027	1241	72307591	71	73.9255	19.4786	71.4153	TetK27_peak_908	Xrcc5	ENSMUST00000027379.8	+	72307421	72394953	TSS	0	-86926	0.006935	0.488728	CCDS35608.1	ENSMUSG00000026187.8	Xrcc5	protein_coding	---	---	3	---	ENSMUSP00000027379.8	Xrcc5-201	1	protein_coding
TetK27	chr1	72582658	72584003	1345	72583481	89	100.56	24.3482	97.8952	TetK27_peak_909	Smarcal1	ENSMUST00000047615.14	+	72583251	72633135	TSS	0	-49132	0.015095	0.559435	CCDS35609.1	ENSMUSG00000039354.16	Smarcal1	protein_coding	OTTMUSG00000021499.1	OTTMUST00000050950.1	2	---	ENSMUSP00000047589.8	Smarcal1-201	1	protein_coding
TetK27	chr1	72710621	72712261	1640	72711527	141	174.512	33.5679	171.46	TetK27_peak_910	Rpl37a	ENSMUST00000059980.10	+	72711290	72713814	TSS	0	-1553	0.384950	0.592322	CCDS35610.1	ENSMUSG00000046330.10	Rpl37a	protein_coding	OTTMUSG00000061689.1	OTTMUST00000150520.1	2	---	ENSMUSP00000058919.9	Rpl37a-201	1	protein_coding
TetK27	chr1	73928166	73928417	251	73928279	13	5.99569	3.7875	4.17465	TetK27_peak_911	Tns1	ENSMUST00000191527.6	-	73925417	73928218	TSS	0	-2749	0.018915	0.210317	---	ENSMUSG00000055322.15	Tns1	protein_coding	OTTMUSG00000047279.1	OTTMUST00000122615.1	2	---	---	Tns1-221	2	retained_intron
TetK27	chr1	73930087	73930798	711	73930446	42	35.4012	11.633	33.1647	TetK27_peak_912	Tns1	ENSMUST00000185529.1	-	73925630	73930506	TSS	0	-4457	0.086119	0.589888	---	ENSMUSG00000055322.15	Tns1	protein_coding	OTTMUSG00000047279.1	OTTMUST00000122617.1	2	---	---	Tns1-204	2	processed_transcript
TetK27	chr1	73935050	73937003	1953	73935996	34	14.3754	4.69139	12.3801	TetK27_peak_913	Tns1	ENSMUST00000212888.1	-	73914530	74124448	CDS Exon 23	187445	-20520	0.009308	1.000000	---	ENSMUSG00000055322.15	Tns1	protein_coding	OTTMUSG00000047279.1	OTTMUST00000150486.1	2	---	ENSMUSP00000148638.1	Tns1-222	5	protein_coding
TetK27	chr1	73937069	73937417	348	73937310	18	7.68473	3.98439	5.81721	TetK27_peak_914	Tns1	ENSMUST00000212888.1	-	73914530	74124448	CDS Exon 22	187031	-22539	0.001663	1.000000	---	ENSMUSG00000055322.15	Tns1	protein_coding	OTTMUSG00000047279.1	OTTMUST00000150486.1	2	---	ENSMUSP00000148638.1	Tns1-222	5	protein_coding
TetK27	chr1	73939937	73940976	1039	73940414	28	19.5842	7.84553	17.5081	TetK27_peak_915	Tns1	ENSMUST00000189228.1	-	73925130	73941015	TSS	39	-14807	0.065466	1.000000	---	ENSMUSG00000055322.15	Tns1	protein_coding	OTTMUSG00000047279.1	OTTMUST00000123152.1	2	---	ENSMUSP00000139721.1	Tns1-213	3	protein_coding
TetK27	chr1	73941054	73941591	537	73941283	21	12.6908	5.95178	10.7156	TetK27_peak_916	Tns1	ENSMUST00000189228.1	-	73925130	73941015	TSS	-39	-15924	0.000000	0.000000	---	ENSMUSG00000055322.15	Tns1	protein_coding	OTTMUSG00000047279.1	OTTMUST00000123152.1	2	---	ENSMUSP00000139721.1	Tns1-213	3	protein_coding
TetK27	chr1	74116015	74116367	352	74116185	22	13.6241	6.22232	11.6331	TetK27_peak_917	Tns1	ENSMUST00000212888.1	-	73914530	74124448	Intron 1	8081	-201485	0.001682	1.000000	---	ENSMUSG00000055322.15	Tns1	protein_coding	OTTMUSG00000047279.1	OTTMUST00000150486.1	2	---	ENSMUSP00000148638.1	Tns1-222	5	protein_coding
TetK27	chr1	74124099	74125309	1210	74124416	51	28.5223	6.97007	26.3506	TetK27_peak_918	Rufy4	ENSMUST00000127134.1	+	74125579	74147774	TSS	-270	-22465	0.000000	0.000000	CCDS48289.1	ENSMUSG00000061815.11	Rufy4	protein_coding	OTTMUSG00000026659.1	OTTMUST00000089392.1	2	---	ENSMUSP00000115873.1	Rufy4-202	1	protein_coding
TetK27	chr1	74153386	74153733	347	74153578	14	5.98663	3.65139	4.17465	TetK27_peak_919	Cxcr2	ENSMUST00000106899.3	+	74153991	74161247	TSS	-258	-7514	0.000000	0.000000	CCDS15040.1	ENSMUSG00000026180.8	Cxcr2	protein_coding	OTTMUSG00000047665.1	OTTMUST00000122843.1	2	---	ENSMUSP00000102512.2	Cxcr2-202	1	protein_coding
TetK27	chr1	74226908	74228244	1336	74227441	47	35.0392	10.0658	32.81	TetK27_peak_920	.	.	.	.	.	Intergenic	.	.	.	.	.	.	.	.	.	.	.	.	.	.	.	.
TetK27	chr1	74235906	74242804	6898	74236871	229	306.831	45.509	302.95	TetK27_peak_921	Arpc2	ENSMUST00000113820.8	+	74236497	74268210	TSS	0	-25406	0.198903	0.914335	CCDS35612.1	ENSMUSG00000006304.14	Arpc2	protein_coding	OTTMUSG00000016449.1	OTTMUST00000039637.1	2	---	ENSMUSP00000109451.2	Arpc2-203	1	protein_coding
TetK27	chr1	74243620	74244015	395	74243793	18	10.0089	5.14017	8.08393	TetK27_peak_922	Arpc2	ENSMUST00000113820.8	+	74236497	74268210	Intron 2	7123	-24195	0.012487	1.000000	CCDS35612.1	ENSMUSG00000006304.14	Arpc2	protein_coding	OTTMUSG00000016449.1	OTTMUST00000039637.1	2	---	ENSMUSP00000109451.2	Arpc2-203	1	protein_coding
TetK27	chr1	74245259	74246396	1137	74245992	21	12.6908	5.95178	10.7156	TetK27_peak_923	Arpc2	ENSMUST00000113820.8	+	74236497	74268210	CDS Exon 3	8762	-21814	0.035883	1.000000	CCDS35612.1	ENSMUSG00000006304.14	Arpc2	protein_coding	OTTMUSG00000016449.1	OTTMUST00000039637.1	2	---	ENSMUSP00000109451.2	Arpc2-203	1	protein_coding
TetK27	chr1	74246739	74251135	4396	74249353	135	175.14	36.7928	172.083	TetK27_peak_924	Arpc2	ENSMUST00000113820.8	+	74236497	74268210	CDS Exon 4	10242	-17075	0.138645	1.000000	CCDS35612.1	ENSMUSG00000006304.14	Arpc2	protein_coding	OTTMUSG00000016449.1	OTTMUST00000039637.1	2	---	ENSMUSP00000109451.2	Arpc2-203	1	protein_coding
TetK27	chr1	74252822	74253110	288	74252929	13	5.99569	3.7875	4.17465	TetK27_peak_925	Arpc2	ENSMUST00000113820.8	+	74236497	74268210	Intron 5	16325	-15100	0.009113	1.000000	CCDS35612.1	ENSMUSG00000006304.14	Arpc2	protein_coding	OTTMUSG00000016449.1	OTTMUST00000039637.1	2	---	ENSMUSP00000109451.2	Arpc2-203	1	protein_coding
TetK27	chr1	74256845	74257285	440	74256994	17	7.42133	3.98811	5.57146	TetK27_peak_926	Arpc2	ENSMUST00000113820.8	+	74236497	74268210	Intron 7	20348	-10925	0.013906	1.000000	CCDS35612.1	ENSMUSG00000006304.14	Arpc2	protein_coding	OTTMUSG00000016449.1	OTTMUST00000039637.1	2	---	ENSMUSP00000109451.2	Arpc2-203	1	protein_coding
TetK27	chr1	74258441	74259207	766	74258650	20	10.3489	4.96426	8.42147	TetK27_peak_927	Arpc2	ENSMUST00000113820.8	+	74236497	74268210	Intron 7	21944	-9003	0.024185	1.000000	CCDS35612.1	ENSMUSG00000006304.14	Arpc2	protein_coding	OTTMUSG00000016449.1	OTTMUST00000039637.1	2	---	ENSMUSP00000109451.2	Arpc2-203	1	protein_coding
TetK27	chr1	74259423	74260821	1398	74259717	17	9.15743	4.86964	7.25158	TetK27_peak_928	Arpc2	ENSMUST00000113820.8	+	74236497	74268210	Intron 7	22926	-7389	0.044113	1.000000	CCDS35612.1	ENSMUSG00000006304.14	Arpc2	protein_coding	OTTMUSG00000016449.1	OTTMUST00000039637.1	2	---	ENSMUSP00000109451.2	Arpc2-203	1	protein_coding
TetK27	chr1	74261218	74261469	251	74261285	12	5.2738	3.51696	3.47795	TetK27_peak_929	Arpc2	ENSMUST00000113820.8	+	74236497	74268210	Intron 7	24721	-6741	0.007946	1.000000	CCDS35612.1	ENSMUSG00000006304.14	Arpc2	protein_coding	OTTMUSG00000016449.1	OTTMUST00000039637.1	2	---	ENSMUSP00000109451.2	Arpc2-203	1	protein_coding
TetK27	chr1	74261633	74264309	2676	74262621	53	49.2504	14.6089	46.9036	TetK27_peak_930	Arpc2	ENSMUST00000113820.8	+	74236497	74268210	CDS Exon 8	25136	-3901	0.084411	1.000000	CCDS35612.1	ENSMUSG00000006304.14	Arpc2	protein_coding	OTTMUSG00000016449.1	OTTMUST00000039637.1	2	---	ENSMUSP00000109451.2	Arpc2-203	1	protein_coding
TetK27	chr1	74266018	74266269	251	74266093	13	5.99569	3.7875	4.17465	TetK27_peak_931	Arpc2	ENSMUST00000113820.8	+	74236497	74268210	Intron 10	29521	-1941	0.007946	1.000000	CCDS35612.1	ENSMUSG00000006304.14	Arpc2	protein_coding	OTTMUSG00000016449.1	OTTMUST00000039637.1	2	---	ENSMUSP00000109451.2	Arpc2-203	1	protein_coding
TetK27	chr1	74281233	74281519	286	74281304	13	5.99569	3.7875	4.17465	TetK27_peak_932	Gm28364	ENSMUST00000187908.1	+	74281161	74281867	TSS	72	-348	0.405941	1.000000	---	ENSMUSG00000101503.1	Gm28364	antisense_RNA	OTTMUSG00000047668.1	OTTMUST00000122853.1	2	---	---	Gm28364-201	3	antisense_RNA
TetK27	chr1	74283260	74285755	2495	74284552	152	192.783	36.1682	189.634	TetK27_peak_933	Pnkd	ENSMUST00000152492.1	+	74285777	74287274	TSS	-22	-1519	0.000000	0.000000	---	ENSMUSG00000026179.14	Pnkd	protein_coding	OTTMUSG00000021729.1	OTTMUST00000051565.1	2	---	---	Pnkd-207	1	retained_intron
TetK27	chr1	74303519	74304512	993	74304106	50	27.6155	6.83603	25.4538	TetK27_peak_934	Tmbim1	ENSMUST00000113796.7	-	74288253	74304362	TSS	0	-15266	0.052390	0.849095	CCDS15044.1	ENSMUSG00000006301.17	Tmbim1	protein_coding	OTTMUSG00000021738.1	OTTMUST00000051569.1	2	---	ENSMUSP00000109427.1	Tmbim1-202	1	protein_coding
TetK27	chr1	74332176	74333304	1128	74332663	44	37.8375	12.1741	35.5808	TetK27_peak_935	Pnkd	ENSMUST00000087225.5	+	74332610	74353687	TSS	0	-20383	0.032973	0.615589	CCDS15045.1	ENSMUSG00000026179.14	Pnkd	protein_coding	OTTMUSG00000021729.1	OTTMUST00000051563.1	2	---	ENSMUSP00000084477.5	Pnkd-202	1	protein_coding
TetK27	chr1	74360274	74360645	371	74360467	19	9.53241	4.72787	7.62311	TetK27_peak_936	.	.	.	.	.	Intergenic	.	.	.	.	.	.	.	.	.	.	.	.	.	.	.	.
TetK27	chr1	74386407	74387652	1245	74387130	141	169.452	31.4617	166.427	TetK27_peak_937	.	.	.	.	.	Intergenic	.	.	.	.	.	.	.	.	.	.	.	.	.	.	.	.
TetK27	chr1	74389749	74392747	2998	74392048	221	248.964	29.7568	245.493	TetK27_peak_938	Ctdsp1	ENSMUST00000027367.13	+	74391509	74397286	TSS	0	-4539	0.214434	0.413138	CCDS15048.1	ENSMUSG00000026176.13	Ctdsp1	protein_coding	OTTMUSG00000021740.1	OTTMUST00000051577.1	2	---	ENSMUSP00000027367.7	Ctdsp1-201	1	protein_coding
TetK27	chr1	74396432	74396708	276	74396489	11	4.58302	3.24643	2.81413	TetK27_peak_939	Ctdsp1	ENSMUST00000141175.1	+	74391795	74397283	TTS	4637	-575	0.050465	1.000000	---	ENSMUSG00000026176.13	Ctdsp1	protein_coding	OTTMUSG00000021740.1	OTTMUST00000051578.1	2	---	---	Ctdsp1-202	2	retained_intron
TetK27	chr1	74396910	74398354	1444	74397527	66	47.8817	10.4954	45.5504	TetK27_peak_940	Ctdsp1	ENSMUST00000141175.1	+	74391795	74397283	TTS	5115	0	0.068136	0.258824	---	ENSMUSG00000026176.13	Ctdsp1	protein_coding	OTTMUSG00000021740.1	OTTMUST00000051578.1	2	---	---	Ctdsp1-202	2	retained_intron
TetK27	chr1	74505111	74507310	2199	74506451	175	220.516	36.9081	217.212	TetK27_peak_941	Usp37	ENSMUST00000190592.1	-	74499872	74505792	TSS	0	-5239	0.115183	0.310000	---	ENSMUSG00000033364.13	Usp37	protein_coding	OTTMUSG00000047946.1	OTTMUST00000123351.1	2	---	---	Usp37-206	3	retained_intron
TetK27	chr1	74586849	74589052	2203	74587907	184	225.153	34.8597	221.825	TetK27_peak_942	Zfp142	ENSMUST00000113737.7	-	74565127	74588029	TSS	0	-21722	0.051565	0.535844	CCDS35618.1	ENSMUSG00000026135.17	Zfp142	protein_coding	OTTMUSG00000021744.1	OTTMUST00000051590.1	2	---	ENSMUSP00000109366.1	Zfp142-203	1	protein_coding
TetK27	chr1	74600728	74601913	1185	74601094	82	89.9982	22.4545	87.3929	TetK27_peak_943	Rnf25	ENSMUST00000135140.7	-	74593748	74601373	TSS	0	-6980	0.084710	0.544688	---	ENSMUSG00000026171.12	Rnf25	protein_coding	OTTMUSG00000021746.1	OTTMUST00000051605.1	2	---	ENSMUSP00000138040.1	Rnf25-206	5	nonsense_mediated_decay
TetK27	chr1	74661605	74662549	944	74661899	74	60.0709	12.8307	57.6504	TetK27_peak_944	Ttll4	ENSMUST00000042125.14	+	74661745	74703731	TSS	0	-41182	0.019173	0.851852	CCDS15053.1	ENSMUSG00000033257.14	Ttll4	protein_coding	OTTMUSG00000021753.1	OTTMUST00000051630.1	2	---	ENSMUSP00000037406.8	Ttll4-201	1	protein_coding
TetK27	chr1	74791592	74791848	256	74791783	13	4.36943	2.92662	2.62786	TetK27_peak_945	Wnt10a	ENSMUST00000006718.14	+	74791516	74804180	TSS	76	-12332	0.020292	1.000000	CCDS15057.1	ENSMUSG00000026167.14	Wnt10a	protein_coding	OTTMUSG00000020879.1	OTTMUST00000049359.1	2	---	ENSMUSP00000006718.8	Wnt10a-201	1	protein_coding
TetK27	chr1	74800243	74801164	921	74800698	22	11.6542	5.2532	9.70686	TetK27_peak_946	Wnt10a	ENSMUST00000006718.14	+	74791516	74804180	CDS Exon 3	8727	-3016	0.072799	1.000000	CCDS15057.1	ENSMUSG00000026167.14	Wnt10a	protein_coding	OTTMUSG00000020879.1	OTTMUST00000049359.1	2	---	ENSMUSP00000006718.8	Wnt10a-201	1	protein_coding
TetK27	chr1	74801957	74802265	308	74802103	13	5.99569	3.7875	4.17465	TetK27_peak_947	Wnt10a	ENSMUST00000187238.1	+	74793363	74803496	Intron 1	8594	-1231	0.030491	1.000000	---	ENSMUSG00000026167.14	Wnt10a	protein_coding	OTTMUSG00000020879.1	OTTMUST00000123856.1	2	---	ENSMUSP00000139656.1	Wnt10a-202	5	protein_coding
TetK27	chr1	74802715	74803853	1138	74803448	41	19.8519	5.62967	17.7752	TetK27_peak_948	Wnt10a	ENSMUST00000006718.14	+	74791516	74804180	TTS	11199	-327	0.089933	1.000000	CCDS15057.1	ENSMUSG00000026167.14	Wnt10a	protein_coding	OTTMUSG00000020879.1	OTTMUST00000049359.1	2	---	ENSMUSP00000006718.8	Wnt10a-201	1	protein_coding
TetK27	chr1	74806076	74807893	1817	74807049	63	62.6861	17.3143	60.2474	TetK27_peak_949	.	.	.	.	.	Intergenic	.	.	.	.	.	.	.	.	.	.	.	.	.	.	.	.
TetK27	chr1	74807963	74808266	303	74808183	13	5.99569	3.7875	4.17465	TetK27_peak_950	.	.	.	.	.	Intergenic	.	.	.	.	.	.	.	.	.	.	.	.	.	.	.	.
TetK27	chr1	74816417	74817769	1352	74817188	165	227.444	44.833	224.103	TetK27_peak_951	.	.	.	.	.	Intergenic	.	.	.	.	.	.	.	.	.	.	.	.	.	.	.	.
TetK27	chr1	74854844	74855647	803	74855141	26	9.64991	3.90055	7.73961	TetK27_peak_952	Cdk5r2	ENSMUST00000160379.3	+	74854934	74857733	TSS	0	-2086	0.255000	0.888060	CCDS48290.1	ENSMUSG00000090071.4	Cdk5r2	protein_coding	OTTMUSG00000034759.1	OTTMUST00000088334.1	2	---	ENSMUSP00000125322.2	Cdk5r2-201		protein_coding
TetK27	chr1	75123739	75125982	2243	75125049	185	226.789	35.0482	223.451	TetK27_peak_953	Nhej1	ENSMUST00000188033.1	-	75125136	75125201	TSS	0	0	1.000000	0.029412	---	ENSMUSG00000026162.7	Nhej1	protein_coding	OTTMUSG00000021757.1	OTTMUST00000124173.1	2	---	---	Nhej1-202		processed_transcript
TetK27	chr1	75140320	75144166	3846	75142903	253	330.142	43.4533	326.063	TetK27_peak_954	Cnppd1	ENSMUST00000041213.11	-	75135771	75142698	TSS	0	-4549	0.343389	0.618404	CCDS15063.1	ENSMUSG00000033159.14	Cnppd1	protein_coding	OTTMUSG00000048448.1	OTTMUST00000124179.1	2	---	ENSMUSP00000044799.5	Cnppd1-201	1	protein_coding
TetK27	chr1	75167800	75169621	1821	75168784	142	158.756	26.9456	155.785	TetK27_peak_955	Zfand2b	ENSMUST00000160033.7	+	75168701	75170570	TSS	0	-949	0.492513	0.505488	---	ENSMUSG00000026197.12	Zfand2b	protein_coding	OTTMUSG00000034818.1	OTTMUST00000088515.1	2	---	---	Zfand2b-202	2	retained_intron
TetK27	chr1	75179786	75180460	674	75180180	44	31.7493	9.43672	29.5514	TetK27_peak_956	Abcb6	ENSMUST00000027396.14	-	75171717	75180393	TSS	0	-8069	0.070070	0.900741	CCDS15065.1	ENSMUSG00000026198.15	Abcb6	protein_coding	OTTMUSG00000034720.1	OTTMUST00000088204.1	2	---	ENSMUSP00000027396.8	Abcb6-201	1	protein_coding
TetK27	chr1	75191078	75192889	1811	75191774	174	213.423	34.6264	210.16	TetK27_peak_957	Atg9a	ENSMUST00000188347.6	-	75180865	75192197	TSS	0	-10213	0.098826	0.618102	CCDS35622.1	ENSMUSG00000033124.15	Atg9a	protein_coding	OTTMUSG00000048480.1	OTTMUST00000124249.1	2	---	ENSMUSP00000139731.1	Atg9a-205	5	protein_coding
TetK27	chr1	75210244	75211822	1578	75211000	224	245.995	28.1291	242.541	TetK27_peak_958	Stk16	ENSMUST00000135484.7	+	75210876	75214240	TSS	0	-2418	0.281426	0.599747	---	ENSMUSG00000026201.12	Stk16	protein_coding	OTTMUSG00000029626.1	OTTMUST00000073491.1	2	---	---	Stk16-205	1	retained_intron
TetK27	chr1	75212212	75212552	340	75212415	14	5.78446	3.5459	3.98249	TetK27_peak_959	Stk16	ENSMUST00000189242.1	+	75212632	75213914	TSS	-80	-1362	0.000000	0.000000	---	ENSMUSG00000026201.12	Stk16	protein_coding	OTTMUSG00000029626.1	OTTMUST00000124383.1	2	---	---	Stk16-214	1	retained_intron
TetK27	chr1	75212819	75213515	696	75213146	19	10.8823	5.41071	8.93972	TetK27_peak_960	Stk16	ENSMUST00000156012.1	+	75213061	75214032	TSS	0	-517	0.468107	0.652798	---	ENSMUSG00000026201.12	Stk16	protein_coding	OTTMUSG00000029626.1	OTTMUST00000073498.1	2	---	---	Stk16-210	1	retained_intron
TetK27	chr1	75213798	75215228	1430	75214408	22	7.82677	3.60291	5.95871	TetK27_peak_961	Stk16	ENSMUST00000188460.2	+	75211240	75213952	TTS	2558	0	0.057132	0.108316	---	ENSMUSG00000026201.12	Stk16	protein_coding	OTTMUSG00000029626.1	OTTMUST00000124380.1	2	---	ENSMUSP00000139998.1	Stk16-213	5	protein_coding
TetK27	chr1	75216742	75217023	281	75216889	14	6.74667	4.05803	4.90229	TetK27_peak_962	Tuba4a	ENSMUST00000189131.1	-	75216913	75218889	TTS	1866	0	0.056146	0.393617	---	ENSMUSG00000026202.13	Tuba4a	protein_coding	OTTMUSG00000048543.1	OTTMUST00000124395.1	2	---	ENSMUSP00000140970.1	Tuba4a-207	3	protein_coding
TetK27	chr1	75217568	75219943	2375	75218728	139	181.983	37.875	178.89	TetK27_peak_963	Tuba4a	ENSMUST00000079464.12	-	75214972	75218625	TSS	0	-2596	0.289546	0.445286	---	ENSMUSG00000026202.13	Tuba4a	protein_coding	OTTMUSG00000048543.1	OTTMUST00000124384.1	2	---	ENSMUSP00000078429.7	Tuba4a-201	1	protein_coding
TetK27	chr1	75234479	75235388	909	75235013	18	10.0089	5.14017	8.08393	TetK27_peak_964	.	.	.	.	.	Intergenic	.	.	.	.	.	.	.	.	.	.	.	.	.	.	.	.
TetK27	chr1	75235489	75237860	2371	75236683	234	309.558	44.2813	305.653	TetK27_peak_965	Dnajb2	ENSMUST00000186600.1	+	75236772	75237682	TSS	0	0	1.000000	0.384064	---	ENSMUSG00000026203.16	Dnajb2	protein_coding	OTTMUSG00000048595.1	OTTMUST00000124486.1	2	---	---	Dnajb2-205	2	retained_intron
TetK27	chr1	75248021	75248913	892	75248678	40	32.1545	10.6833	29.9492	TetK27_peak_966	Ptprn	ENSMUST00000027404.11	-	75247027	75264214	TTS	15301	-994	0.051955	1.000000	CCDS35625.1	ENSMUSG00000026204.15	Ptprn	protein_coding	OTTMUSG00000048596.1	OTTMUST00000124490.1	2	---	ENSMUSP00000027404.5	Ptprn-201	1	protein_coding
TetK27	chr1	75249309	75249710	401	75249464	11	4.58302	3.24643	2.81413	TetK27_peak_967	Ptprn	ENSMUST00000027404.11	-	75247027	75264214	Intron 19	14504	-2282	0.023388	1.000000	CCDS35625.1	ENSMUSG00000026204.15	Ptprn	protein_coding	OTTMUSG00000048596.1	OTTMUST00000124490.1	2	---	ENSMUSP00000027404.5	Ptprn-201	1	protein_coding
TetK27	chr1	75251287	75252062	775	75251674	34	18.0696	5.98766	16.0181	TetK27_peak_968	Gm28294	ENSMUST00000191154.1	+	75252322	75257428	TSS	-260	-5366	0.000000	0.000000	---	ENSMUSG00000101840.1	Gm28294	antisense_RNA	OTTMUSG00000048597.1	OTTMUST00000124497.1	2	---	---	Gm28294-201	2	antisense_RNA
TetK27	chr1	75316188	75319000	2812	75317192	168	199.029	31.7418	195.847	TetK27_peak_969	Dnpep	ENSMUST00000189551.6	-	75314364	75316804	TSS	0	-1824	0.252765	0.219339	---	ENSMUSG00000026209.15	Dnpep	protein_coding	OTTMUSG00000048821.1	OTTMUST00000124892.1	2	---	ENSMUSP00000140563.1	Dnpep-212	5	protein_coding
TetK27	chr1	75381529	75382066	537	75381846	44	36.0469	11.3268	33.8082	TetK27_peak_970	Speg	ENSMUST00000187214.1	+	75382126	75383383	TSS	-60	-1317	0.000000	0.000000	---	ENSMUSG00000026207.16	Speg	protein_coding	OTTMUSG00000019414.1	OTTMUST00000124899.1	2	---	---	Speg-215	5	retained_intron
TetK27	chr1	75382284	75382642	358	75382445	20	10.0011	4.7964	8.08393	TetK27_peak_971	Speg	ENSMUST00000146705.1	+	75383556	75384976	TSS	-914	-2334	0.000000	0.000000	---	ENSMUSG00000026207.16	Speg	protein_coding	OTTMUSG00000019414.1	OTTMUST00000046338.1	2	---	---	Speg-213	2	processed_transcript
TetK27	chr1	75435748	75436491	743	75436116	80	82.205	19.7175	79.6486	TetK27_peak_972	Gmppa	ENSMUST00000141124.1	+	75436113	75438329	TSS	0	-1838	0.170952	0.509409	---	ENSMUSG00000033021.16	Gmppa	protein_coding	OTTMUSG00000019424.1	OTTMUST00000046367.1	2	---	ENSMUSP00000116783.1	Gmppa-209	3	protein_coding
TetK27	chr1	75477444	75480256	2812	75479327	235	276.712	33.329	273.057	TetK27_peak_973	Tmem198	ENSMUST00000113575.8	+	75479532	75485694	TSS	0	-5438	0.117638	0.257732	CCDS15076.1	ENSMUSG00000051703.14	Tmem198	protein_coding	OTTMUSG00000019413.1	OTTMUST00000046320.1	2	---	ENSMUSP00000109205.2	Tmem198-202	1	protein_coding
TetK27	chr1	75487473	75487817	344	75487623	17	7.96295	4.25508	6.09287	TetK27_peak_974	Obsl1	ENSMUST00000156499.1	-	75479310	75487234	TSS	-239	-8163	0.000000	0.000000	---	ENSMUSG00000026211.17	Obsl1	protein_coding	OTTMUSG00000016912.1	OTTMUST00000046323.1	2	---	---	Obsl1-212	3	retained_intron
TetK27	chr1	75520787	75522378	1591	75521715	227	310.428	47.8127	306.515	TetK27_peak_975	Stk11ip	ENSMUST00000113553.1	+	75521552	75536933	TSS	0	-14555	0.053764	0.519472	CCDS15079.1	ENSMUSG00000026213.15	Stk11ip	protein_coding	OTTMUSG00000019423.1	OTTMUST00000046359.1	2	---	ENSMUSP00000109182.1	Stk11ip-202	1	protein_coding
TetK27	chr1	75532587	75533809	1222	75533434	15	7.52498	4.32857	5.65872	TetK27_peak_976	Stk11ip	ENSMUST00000146575.7	+	75532531	75534254	TSS	56	-445	0.709397	1.000000	---	ENSMUSG00000026213.15	Stk11ip	protein_coding	OTTMUSG00000019423.1	OTTMUST00000046362.1	2	---	---	Stk11ip-206	3	retained_intron
TetK27	chr1	75559271	75559581	310	75559405	15	7.52498	4.32857	5.65872	TetK27_peak_977	Slc4a3	ENSMUST00000132612.7	+	75546644	75560882	CDS Exon 21	12627	-1301	0.021841	1.000000	---	ENSMUSG00000006576.16	Slc4a3	protein_coding	OTTMUSG00000019426.1	OTTMUST00000046377.1	2	---	---	Slc4a3-205	1	retained_intron
TetK27	chr1	76776860	76777112	252	76777067	17	6.97702	3.77469	5.13045	TetK27_peak_978	.	.	.	.	.	Intergenic	.	.	.	.	.	.	.	.	.	.	.	.	.	.	.	.
TetK27	chr1	76777369	76777782	413	76777579	29	16.6732	6.27132	14.6373	TetK27_peak_979	.	.	.	.	.	Intergenic	.	.	.	.	.	.	.	.	.	.	.	.	.	.	.	.
TetK27	chr1	78196366	78196659	293	78196560	12	5.2738	3.51696	3.47795	TetK27_peak_980	Pax3	ENSMUST00000087086.6	-	78101270	78197135	Intron 1	476	-95096	0.003067	1.000000	CCDS15082.1	ENSMUSG00000004872.15	Pax3	protein_coding	OTTMUSG00000037633.1	OTTMUST00000097091.1	2	---	ENSMUSP00000084320.6	Pax3-202	1	protein_coding
TetK27	chr1	78203666	78204045	379	78203859	12	3.26591	2.4496	1.59523	TetK27_peak_981	.	.	.	.	.	Intergenic	.	.	.	.	.	.	.	.	.	.	.	.	.	.	.	.
TetK27	chr1	78420463	78421004	541	78420581	12	5.2738	3.51696	3.47795	TetK27_peak_982	Farsb	ENSMUST00000170217.7	-	78417975	78488860	3' UTR Exon	67856	-2488	0.007646	1.000000	CCDS15084.1	ENSMUSG00000026245.16	Farsb	protein_coding	OTTMUSG00000047790.1	OTTMUST00000123029.1	2	---	ENSMUSP00000129828.1	Farsb-202	1	protein_coding
TetK27	chr1	78421232	78424063	2831	78423029	74	67.7956	15.7279	65.3269	TetK27_peak_983	Farsb	ENSMUST00000170217.7	-	78417975	78488860	3' UTR Exon	64797	-3257	0.039951	1.000000	CCDS15084.1	ENSMUSG00000026245.16	Farsb	protein_coding	OTTMUSG00000047790.1	OTTMUST00000123029.1	2	---	ENSMUSP00000129828.1	Farsb-202	1	protein_coding
TetK27	chr1	78435825	78436332	507	78435942	18	10.0089	5.14017	8.08393	TetK27_peak_984	Farsb	ENSMUST00000189529.6	-	78425085	78488863	3' UTR Exon	52531	-10740	0.007965	1.000000	---	ENSMUSG00000026245.16	Farsb	protein_coding	OTTMUSG00000047790.1	OTTMUST00000123031.1	2	---	ENSMUSP00000140001.1	Farsb-204	1	nonsense_mediated_decay
TetK27	chr1	78452396	78455269	2873	78454530	77	76.7185	18.4387	74.195	TetK27_peak_985	Farsb	ENSMUST00000068333.13	-	78425068	78488898	CDS Exon 15	33629	-27328	0.045025	1.000000	CCDS15084.1	ENSMUSG00000026245.16	Farsb	protein_coding	OTTMUSG00000047790.1	OTTMUST00000123030.1	2	---	ENSMUSP00000069508.7	Farsb-201	1	protein_coding
TetK27	chr1	78488090	78490496	2406	78488673	149	193.062	37.7559	189.911	TetK27_peak_986	Farsb	ENSMUST00000189529.6	-	78425085	78488863	TSS	0	-63005	0.012136	0.321562	---	ENSMUSG00000026245.16	Farsb	protein_coding	OTTMUSG00000047790.1	OTTMUST00000123031.1	2	---	ENSMUSP00000140001.1	Farsb-204	1	nonsense_mediated_decay
TetK27	chr1	78536943	78539385	2442	78537993	146	194.076	39.7687	190.919	TetK27_peak_987	Mogat1	ENSMUST00000125458.1	+	78537628	78538174	TSS	0	0	1.000000	0.223905	---	ENSMUSG00000012187.13	Mogat1	protein_coding	OTTMUSG00000022263.1	OTTMUST00000053010.1	2	---	---	Mogat1-203	1	processed_transcript
TetK27	chr1	78657325	78658779	1454	78658120	129	118.176	17.6842	115.418	TetK27_peak_988	Utp14b	ENSMUST00000151622.1	+	78658440	78667585	TSS	0	-8806	0.037175	0.233677	CCDS15086.1	ENSMUSG00000079470.8	Utp14b	protein_coding	OTTMUSG00000033117.1	OTTMUST00000082783.1	2	---	ENSMUSP00000121391.1	Utp14b-202	1	protein_coding
TetK27	chr1	79580946	79582170	1224	79581413	44	37.8375	12.1741	35.5808	TetK27_peak_989	.	.	.	.	.	Intergenic	.	.	.	.	.	.	.	.	.	.	.	.	.	.	.	.
TetK27	chr1	79643387	79645038	1651	79644265	23	14.5757	6.49285	12.5699	TetK27_peak_990	Ap1s3	ENSMUST00000160706.1	-	79609186	79671969	Intron 1	26931	-34201	0.026312	1.000000	---	ENSMUSG00000054702.14	Ap1s3	protein_coding	OTTMUSG00000034766.1	OTTMUST00000088359.1	2	---	ENSMUSP00000125631.1	Ap1s3-202	5	nonsense_mediated_decay
TetK27	chr1	79671311	79672584	1273	79671752	107	128.758	29.2178	125.943	TetK27_peak_991	Ap1s3	ENSMUST00000160706.1	-	79609186	79671969	TSS	0	-62125	0.010496	0.517268	---	ENSMUSG00000054702.14	Ap1s3	protein_coding	OTTMUSG00000034766.1	OTTMUST00000088359.1	2	---	ENSMUSP00000125631.1	Ap1s3-202	5	nonsense_mediated_decay
TetK27	chr1	79709931	79710182	251	79710006	13	5.99569	3.7875	4.17465	TetK27_peak_992	Wdfy1	ENSMUST00000187005.6	-	79705357	79761739	3' UTR Exon	51557	-4574	0.004469	1.000000	---	ENSMUSG00000073643.11	Wdfy1	protein_coding	OTTMUSG00000021445.1	OTTMUST00000123168.1	2	---	ENSMUSP00000139961.1	Wdfy1-214	5	nonsense_mediated_decay
TetK27	chr1	79710270	79712440	2170	79711492	74	78.2415	20.2902	75.705	TetK27_peak_993	Wdfy1	ENSMUST00000187005.6	-	79705357	79761739	3' UTR Exon	49299	-4913	0.038505	1.000000	---	ENSMUSG00000073643.11	Wdfy1	protein_coding	OTTMUSG00000021445.1	OTTMUST00000123168.1	2	---	ENSMUSP00000139961.1	Wdfy1-214	5	nonsense_mediated_decay
TetK27	chr1	79750842	79753623	2781	79751917	56	53.2036	15.4205	50.829	TetK27_peak_994	Wdfy1	ENSMUST00000125641.1	-	79733853	79762048	Intron 2	8425	-16989	0.098666	1.000000	---	ENSMUSG00000073643.11	Wdfy1	protein_coding	OTTMUSG00000021445.1	OTTMUST00000050860.1	2	---	ENSMUSP00000118431.1	Wdfy1-208	5	protein_coding
TetK27	chr1	79761008	79762271	1263	79761552	87	80.31	16.5819	77.7631	TetK27_peak_995	Wdfy1	ENSMUST00000113511.7	-	79718974	79761770	TSS	0	-42034	0.017828	0.603639	---	ENSMUSG00000073643.11	Wdfy1	protein_coding	OTTMUSG00000021445.1	OTTMUST00000050878.1	2	---	ENSMUSP00000109139.1	Wdfy1-203	5	protein_coding
TetK27	chr1	79775779	79776666	887	79776211	105	125.557	28.6768	122.759	TetK27_peak_996	Mrpl44	ENSMUST00000189176.1	+	79776116	79778547	TSS	0	-1881	0.226562	0.620495	---	ENSMUSG00000026248.9	Mrpl44	protein_coding	OTTMUSG00000047890.1	OTTMUST00000123172.1	2	---	---	Mrpl44-202	1	retained_intron
TetK27	chr1	79858302	79858587	285	79858437	25	16.0127	6.77478	13.9892	TetK27_peak_997	Serpine2	ENSMUST00000191026.1	-	79857507	79858636	TSS	49	-795	0.253097	1.000000	---	ENSMUSG00000026249.10	Serpine2	protein_coding	OTTMUSG00000021751.1	OTTMUST00000123176.1	2	---	---	Serpine2-205		retained_intron
TetK27	chr1	80213308	80214319	1011	80213684	25	16.5309	7.03392	14.4964	TetK27_peak_998	Fam124b	ENSMUST00000058748.1	-	80198706	80213945	TSS	0	-14602	0.041864	0.630435	CCDS15093.1	ENSMUSG00000043230.2	Fam124b	protein_coding	OTTMUSG00000034807.1	OTTMUST00000088476.1	2	---	ENSMUSP00000052208.1	Fam124b-201	1	protein_coding
TetK27	chr1	80339059	80341979	2920	80340100	293	364.223	39.4077	359.83	TetK27_peak_999	Cul3	ENSMUST00000170897.7	-	80287050	80340308	TSS	0	-52009	0.023470	0.427936	---	ENSMUSG00000004364.14	Cul3	protein_coding	OTTMUSG00000035349.1	OTTMUST00000090234.1	2	---	ENSMUSP00000130010.1	Cul3-206	3	nonsense_mediated_decay
TetK27	chr1	80381652	80382052	400	80381867	20	11.7766	5.68125	9.81736	TetK27_peak_1000	Gm29125	ENSMUST00000187121.1	+	80382822	80386252	TSS	-770	-4200	0.000000	0.000000	---	ENSMUSG00000101722.1	Gm29125	lincRNA	OTTMUSG00000047901.1	OTTMUST00000123189.1	2	---	---	Gm29125-201	1	lincRNA
TetK27	chr1	80389116	80390356	1240	80389631	68	69.6635	18.6669	67.1803	TetK27_peak_1001	.	.	.	.	.	Intergenic	.	.	.	.	.	.	.	.	.	.	.	.	.	.	.	.
TetK27	chr1	80440081	80441545	1464	80441301	30	21.6938	8.3866	19.5925	TetK27_peak_1002	.	.	.	.	.	Intergenic	.	.	.	.	.	.	.	.	.	.	.	.	.	.	.	.
TetK27	chr1	80613604	80614106	502	80613875	25	14.7133	6.14623	12.7056	TetK27_peak_1003	Dock10	ENSMUST00000077946.11	-	80501073	80758449	Intron 4	144343	-112531	0.001954	1.000000	CCDS48297.1	ENSMUSG00000038608.15	Dock10	protein_coding	OTTMUSG00000047903.1	OTTMUST00000123191.1	2	---	ENSMUSP00000077099.5	Dock10-201	5	protein_coding
TetK27	chr1	80635660	80638586	2926	80637532	50	45.3688	13.7973	43.0514	TetK27_peak_1004	Dock10	ENSMUST00000077946.11	-	80501073	80758449	Intron 2	119863	-134587	0.011372	1.000000	CCDS48297.1	ENSMUSG00000038608.15	Dock10	protein_coding	OTTMUSG00000047903.1	OTTMUST00000123191.1	2	---	ENSMUSP00000077099.5	Dock10-201	5	protein_coding
TetK27	chr1	80641456	80641853	397	80641607	17	9.15743	4.86964	7.25158	TetK27_peak_1005	Dock10	ENSMUST00000077946.11	-	80501073	80758449	Intron 2	116596	-140383	0.001546	1.000000	CCDS48297.1	ENSMUSG00000038608.15	Dock10	protein_coding	OTTMUSG00000047903.1	OTTMUST00000123191.1	2	---	ENSMUSP00000077099.5	Dock10-201	5	protein_coding
TetK27	chr1	80643363	80644845	1482	80643950	21	12.6908	5.95178	10.7156	TetK27_peak_1006	Dock10	ENSMUST00000077946.11	-	80501073	80758449	Intron 2	113604	-142290	0.005762	1.000000	CCDS48297.1	ENSMUSG00000038608.15	Dock10	protein_coding	OTTMUSG00000047903.1	OTTMUST00000123191.1	2	---	ENSMUSP00000077099.5	Dock10-201	5	protein_coding
TetK27	chr1	80661254	80662623	1369	80662123	37	29.4889	10.2804	27.3063	TetK27_peak_1007	Dock10	ENSMUST00000077946.11	-	80501073	80758449	Intron 1	95826	-160181	0.005323	1.000000	CCDS48297.1	ENSMUSG00000038608.15	Dock10	protein_coding	OTTMUSG00000047903.1	OTTMUST00000123191.1	2	---	ENSMUSP00000077099.5	Dock10-201	5	protein_coding
TetK27	chr1	80662909	80663343	434	80663138	23	14.5757	6.49285	12.5699	TetK27_peak_1008	Dock10	ENSMUST00000077946.11	-	80501073	80758449	Intron 1	95106	-161836	0.001690	1.000000	CCDS48297.1	ENSMUSG00000038608.15	Dock10	protein_coding	OTTMUSG00000047903.1	OTTMUST00000123191.1	2	---	ENSMUSP00000077099.5	Dock10-201	5	protein_coding
TetK27	chr1	80664430	80666499	2069	80665057	69	71.078	18.9375	68.5858	TetK27_peak_1009	Dock10	ENSMUST00000191449.1	-	80592601	80665293	TSS	0	-71829	0.011886	0.417391	---	ENSMUSG00000038608.15	Dock10	protein_coding	OTTMUSG00000047903.1	OTTMUST00000123200.1	1	---	ENSMUSP00000140513.1	Dock10-210	1	protein_coding
TetK27	chr1	80670465	80670838	373	80670661	22	13.6241	6.22232	11.6331	TetK27_peak_1010	Gm37645	ENSMUST00000194285.1	-	80666009	80669565	TSS	-900	-4456	0.000000	0.000000	---	ENSMUSG00000103192.1	Gm37645	TEC	OTTMUSG00000047905.1	OTTMUST00000123204.1	2	---	---	Gm37645-201		TEC
TetK27	chr1	80719579	80720233	654	80719749	24	12.3552	5.24262	10.3919	TetK27_peak_1011	Dock10	ENSMUST00000077946.11	-	80501073	80758449	Intron 1	38216	-218506	0.002545	1.000000	CCDS48297.1	ENSMUSG00000038608.15	Dock10	protein_coding	OTTMUSG00000047903.1	OTTMUST00000123191.1	2	---	ENSMUSP00000077099.5	Dock10-201	5	protein_coding
TetK27	chr1	80730473	80731214	741	80730997	21	12.6908	5.95178	10.7156	TetK27_peak_1012	Gm38062	ENSMUST00000192541.1	-	80728809	80730665	TSS	0	-1664	0.103931	0.260108	---	ENSMUSG00000104488.1	Gm38062	TEC	OTTMUSG00000047906.1	OTTMUST00000123205.1	2	---	---	Gm38062-201		TEC
TetK27	chr1	80744605	80747665	3060	80746201	127	161.608	34.6285	158.621	TetK27_peak_1013	A630081D01Rik	ENSMUST00000195842.1	-	80747222	80749055	TTS	1390	0	0.242094	0.145051	---	ENSMUSG00000102721.1	A630081D01Rik	TEC	OTTMUSG00000047907.1	OTTMUST00000123206.1	2	---	---	A630081D01Rik-201		TEC
TetK27	chr1	80755462	80756327	865	80755760	22	13.6241	6.22232	11.6331	TetK27_peak_1014	Dock10	ENSMUST00000077946.11	-	80501073	80758449	Intron 1	2122	-254389	0.003365	1.000000	CCDS48297.1	ENSMUSG00000038608.15	Dock10	protein_coding	OTTMUSG00000047903.1	OTTMUST00000123191.1	2	---	ENSMUSP00000077099.5	Dock10-201	5	protein_coding
TetK27	chr1	80756586	80759064	2478	80758293	250	303.579	36.2607	299.721	TetK27_peak_1015	Dock10	ENSMUST00000191505.1	-	80583217	80758528	TSS	0	-173369	0.011083	0.783784	---	ENSMUSG00000038608.15	Dock10	protein_coding	OTTMUSG00000047903.1	OTTMUST00000123198.1	2	---	---	Dock10-211	1	retained_intron
TetK27	chr1	80765574	80766363	789	80765809	20	11.7766	5.68125	9.81736	TetK27_peak_1016	.	.	.	.	.	Intergenic	.	.	.	.	.	.	.	.	.	.	.	.	.	.	.	.
TetK27	chr1	80854353	80855514	1161	80855232	26	17.5331	7.30446	15.4838	TetK27_peak_1017	.	.	.	.	.	Intergenic	.	.	.	.	.	.	.	.	.	.	.	.	.	.	.	.
TetK27	chr1	80874483	80874838	355	80874667	14	6.74667	4.05803	4.90229	TetK27_peak_1018	.	.	.	.	.	Intergenic	.	.	.	.	.	.	.	.	.	.	.	.	.	.	.	.
TetK27	chr1	82282564	82284112	1548	82283509	74	72.4616	17.6755	69.9647	TetK27_peak_1019	Irs1	ENSMUST00000069799.2	-	82233101	82291417	3' UTR Exon	7305	-49463	0.026562	1.000000	CCDS15096.1	ENSMUSG00000055980.2	Irs1	protein_coding	OTTMUSG00000016464.1	OTTMUST00000039671.1	2	---	ENSMUSP00000063795.2	Irs1-201	1	protein_coding
TetK27	chr1	82291383	82291743	360	82291510	20	11.0001	5.28582	9.05712	TetK27_peak_1020	Irs1	ENSMUST00000069799.2	-	82233101	82291417	TSS	0	-58282	0.000600	0.096953	CCDS15096.1	ENSMUSG00000055980.2	Irs1	protein_coding	OTTMUSG00000016464.1	OTTMUST00000039671.1	2	---	ENSMUSP00000063795.2	Irs1-201	1	protein_coding
TetK27	chr1	82316009	82317659	1650	82316795	268	356.136	46.0195	351.819	TetK27_peak_1021	Rhbdd1	ENSMUST00000187475.1	+	82316642	82319731	TSS	0	-2072	0.329450	0.616596	---	ENSMUSG00000026142.15	Rhbdd1	protein_coding	OTTMUSG00000021465.1	OTTMUST00000123294.1	2	---	---	Rhbdd1-203		retained_intron
TetK27	chr1	82442928	82444672	1744	82443448	40	33.0047	11.092	30.7894	TetK27_peak_1022	Rhbdd1	ENSMUST00000027322.13	+	82316452	82445367	TTS	126476	-695	0.013536	1.000000	CCDS15097.1	ENSMUSG00000026142.15	Rhbdd1	protein_coding	OTTMUSG00000021465.1	OTTMUST00000050884.1	2	---	ENSMUSP00000027322.7	Rhbdd1-201	1	protein_coding
TetK27	chr1	82724637	82725878	1241	82725072	190	235	35.9903	231.613	TetK27_peak_1023	C430014B12Rik	ENSMUST00000186858.1	-	82719911	82725170	TSS	0	-4726	0.101521	0.429952	---	ENSMUSG00000097564.2	C430014B12Rik	processed_transcript	OTTMUSG00000047954.1	OTTMUST00000123301.1	2	---	---	C430014B12Rik-202	2	antisense_RNA
TetK27	chr1	82794489	82796802	2313	82795598	79	85.5487	21.6428	82.969	TetK27_peak_1024	.	.	.	.	.	Intergenic	.	.	.	.	.	.	.	.	.	.	.	.	.	.	.	.
TetK27	chr1	82806478	82808101	1623	82807345	63	62.6861	17.3143	60.2474	TetK27_peak_1025	Gm36999	ENSMUST00000192756.1	-	82806423	82807469	TSS	0	-55	0.947469	0.610837	---	ENSMUSG00000102280.1	Gm36999	TEC	OTTMUSG00000047957.1	OTTMUST00000123306.1	2	---	---	Gm36999-201		TEC
TetK27	chr1	82808181	82808590	409	82808408	17	9.15743	4.86964	7.25158	TetK27_peak_1026	Gm36999	ENSMUST00000192756.1	-	82806423	82807469	TSS	-712	-1758	0.000000	0.000000	---	ENSMUSG00000102280.1	Gm36999	TEC	OTTMUSG00000047957.1	OTTMUST00000123306.1	2	---	---	Gm36999-201		TEC
TetK27	chr1	82808725	82809802	1077	82809151	26	17.5331	7.30446	15.4838	TetK27_peak_1027	.	.	.	.	.	Intergenic	.	.	.	.	.	.	.	.	.	.	.	.	.	.	.	.
TetK27	chr1	82810437	82810827	390	82810624	14	6.74667	4.05803	4.90229	TetK27_peak_1028	.	.	.	.	.	Intergenic	.	.	.	.	.	.	.	.	.	.	.	.	.	.	.	.
TetK27	chr1	82810953	82811223	270	82811124	12	5.2738	3.51696	3.47795	TetK27_peak_1029	.	.	.	.	.	Intergenic	.	.	.	.	.	.	.	.	.	.	.	.	.	.	.	.
TetK27	chr1	82811640	82812229	589	82811976	29	20.6319	8.11607	18.5431	TetK27_peak_1030	.	.	.	.	.	Intergenic	.	.	.	.	.	.	.	.	.	.	.	.	.	.	.	.
TetK27	chr1	82815705	82816325	620	82815932	22	13.6241	6.22232	11.6331	TetK27_peak_1031	.	.	.	.	.	Intergenic	.	.	.	.	.	.	.	.	.	.	.	.	.	.	.	.
TetK27	chr1	82817566	82817817	251	82817668	11	4.58302	3.24643	2.81413	TetK27_peak_1032	.	.	.	.	.	Intergenic	.	.	.	.	.	.	.	.	.	.	.	.	.	.	.	.
TetK27	chr1	82817940	82821359	3419	82820359	152	204.556	41.3919	201.343	TetK27_peak_1033	Gm28942	ENSMUST00000186334.1	+	82819835	82820378	TSS	0	0	1.000000	0.159064	---	ENSMUSG00000100170.1	Gm28942	lincRNA	OTTMUSG00000047958.1	OTTMUST00000123307.1	2	---	---	Gm28942-201	3	lincRNA
TetK27	chr1	82821776	82822191	415	82821982	20	11.7766	5.68125	9.81736	TetK27_peak_1034	.	.	.	.	.	Intergenic	.	.	.	.	.	.	.	.	.	.	.	.	.	.	.	.
TetK27	chr1	82828989	82829388	399	82829212	14	6.74667	4.05803	4.90229	TetK27_peak_1035	.	.	.	.	.	Intergenic	.	.	.	.	.	.	.	.	.	.	.	.	.	.	.	.
TetK27	chr1	82829601	82830556	955	82830261	26	14.0544	5.66203	12.0604	TetK27_peak_1036	.	.	.	.	.	Intergenic	.	.	.	.	.	.	.	.	.	.	.	.	.	.	.	.
TetK27	chr1	82830611	82838124	7513	82832147	221	331.582	60.0589	327.49	TetK27_peak_1037	.	.	.	.	.	Intergenic	.	.	.	.	.	.	.	.	.	.	.	.	.	.	.	.
TetK27	chr1	82838377	82844646	6269	82839590	315	412.775	45.6509	407.872	TetK27_peak_1038	Agfg1	ENSMUST00000190046.6	+	82839734	82895123	TSS	0	-50477	0.088698	0.783573	---	ENSMUSG00000026159.13	Agfg1	protein_coding	OTTMUSG00000047960.1	OTTMUST00000123315.1	2	---	ENSMUSP00000140473.1	Agfg1-207	5	protein_coding
TetK27	chr1	82846008	82847027	1019	82846720	26	14.0544	5.66203	12.0604	TetK27_peak_1039	Agfg1	ENSMUST00000186043.1	+	82840073	82880123	5' UTR Exon	5935	-33096	0.025468	1.000000	---	ENSMUSG00000026159.13	Agfg1	protein_coding	OTTMUSG00000047960.1	OTTMUST00000123316.1	2	---	ENSMUSP00000140678.1	Agfg1-203	5	protein_coding
TetK27	chr1	82849218	82849711	493	82849467	17	6.15184	3.39176	4.3298	TetK27_peak_1040	Agfg1	ENSMUST00000186043.1	+	82840073	82880123	5' UTR Exon	9145	-30412	0.012334	1.000000	---	ENSMUSG00000026159.13	Agfg1	protein_coding	OTTMUSG00000047960.1	OTTMUST00000123316.1	2	---	ENSMUSP00000140678.1	Agfg1-203	5	protein_coding
TetK27	chr1	82849812	82851547	1735	82850938	32	23.8582	8.92767	21.733	TetK27_peak_1041	Agfg1	ENSMUST00000186043.1	+	82840073	82880123	5' UTR Exon	9739	-28576	0.043345	1.000000	---	ENSMUSG00000026159.13	Agfg1	protein_coding	OTTMUSG00000047960.1	OTTMUST00000123316.1	2	---	ENSMUSP00000140678.1	Agfg1-203	5	protein_coding
TetK27	chr1	82852318	82852709	391	82852439	15	4.92003	3.0149	3.14882	TetK27_peak_1042	Agfg1	ENSMUST00000186043.1	+	82840073	82880123	5' UTR Exon	12245	-27414	0.009788	1.000000	---	ENSMUSG00000026159.13	Agfg1	protein_coding	OTTMUSG00000047960.1	OTTMUST00000123316.1	2	---	ENSMUSP00000140678.1	Agfg1-203	5	protein_coding
TetK27	chr1	82853026	82853559	533	82853266	19	10.8823	5.41071	8.93972	TetK27_peak_1043	Agfg1	ENSMUST00000186043.1	+	82840073	82880123	5' UTR Exon	12953	-26564	0.013333	1.000000	---	ENSMUSG00000026159.13	Agfg1	protein_coding	OTTMUSG00000047960.1	OTTMUST00000123316.1	2	---	ENSMUSP00000140678.1	Agfg1-203	5	protein_coding
TetK27	chr1	82853871	82854169	298	82853961	16	8.32904	4.5991	6.44257	TetK27_peak_1044	Agfg1	ENSMUST00000186043.1	+	82840073	82880123	5' UTR Exon	13798	-25954	0.007465	1.000000	---	ENSMUSG00000026159.13	Agfg1	protein_coding	OTTMUSG00000047960.1	OTTMUST00000123316.1	2	---	ENSMUSP00000140678.1	Agfg1-203	5	protein_coding
TetK27	chr1	82857585	82858044	459	82857804	12	5.2738	3.51696	3.47795	TetK27_peak_1045	Agfg1	ENSMUST00000186043.1	+	82840073	82880123	5' UTR Exon	17512	-22079	0.011485	1.000000	---	ENSMUSG00000026159.13	Agfg1	protein_coding	OTTMUSG00000047960.1	OTTMUST00000123316.1	2	---	ENSMUSP00000140678.1	Agfg1-203	5	protein_coding
TetK27	chr1	82861942	82862404	462	82862149	17	9.15743	4.86964	7.25158	TetK27_peak_1046	Agfg1	ENSMUST00000190046.6	+	82839734	82895123	Intron 2	22208	-32719	0.008359	1.000000	---	ENSMUSG00000026159.13	Agfg1	protein_coding	OTTMUSG00000047960.1	OTTMUST00000123315.1	2	---	ENSMUSP00000140473.1	Agfg1-207	5	protein_coding
TetK27	chr1	82863670	82863921	251	82863788	12	5.2738	3.51696	3.47795	TetK27_peak_1047	Agfg1	ENSMUST00000190046.6	+	82839734	82895123	Intron 2	23936	-31202	0.004550	1.000000	---	ENSMUSG00000026159.13	Agfg1	protein_coding	OTTMUSG00000047960.1	OTTMUST00000123315.1	2	---	ENSMUSP00000140473.1	Agfg1-207	5	protein_coding
TetK27	chr1	82866766	82867043	277	82866891	14	6.74667	4.05803	4.90229	TetK27_peak_1048	Agfg1	ENSMUST00000190046.6	+	82839734	82895123	Intron 2	27032	-28080	0.005019	1.000000	---	ENSMUSG00000026159.13	Agfg1	protein_coding	OTTMUSG00000047960.1	OTTMUST00000123315.1	2	---	ENSMUSP00000140473.1	Agfg1-207	5	protein_coding
TetK27	chr1	82868058	82868538	480	82868307	41	34.1979	11.3625	31.9719	TetK27_peak_1049	Agfg1	ENSMUST00000190046.6	+	82839734	82895123	Intron 2	28324	-26585	0.008684	1.000000	---	ENSMUSG00000026159.13	Agfg1	protein_coding	OTTMUSG00000047960.1	OTTMUST00000123315.1	2	---	ENSMUSP00000140473.1	Agfg1-207	5	protein_coding
TetK27	chr1	82869080	82869529	449	82869324	17	9.15743	4.86964	7.25158	TetK27_peak_1050	Agfg1	ENSMUST00000190046.6	+	82839734	82895123	Intron 2	29346	-25594	0.008124	1.000000	---	ENSMUSG00000026159.13	Agfg1	protein_coding	OTTMUSG00000047960.1	OTTMUST00000123315.1	2	---	ENSMUSP00000140473.1	Agfg1-207	5	protein_coding
TetK27	chr1	82869652	82870538	886	82869809	17	9.15743	4.86964	7.25158	TetK27_peak_1051	Agfg1	ENSMUST00000190046.6	+	82839734	82895123	Intron 2	29918	-24585	0.016014	1.000000	---	ENSMUSG00000026159.13	Agfg1	protein_coding	OTTMUSG00000047960.1	OTTMUST00000123315.1	2	---	ENSMUSP00000140473.1	Agfg1-207	5	protein_coding
TetK27	chr1	82877857	82878420	563	82878072	16	8.32904	4.5991	6.44257	TetK27_peak_1052	Agfg1	ENSMUST00000190046.6	+	82839734	82895123	Intron 5	38123	-16703	0.010182	1.000000	---	ENSMUSG00000026159.13	Agfg1	protein_coding	OTTMUSG00000047960.1	OTTMUST00000123315.1	2	---	ENSMUSP00000140473.1	Agfg1-207	5	protein_coding
TetK27	chr1	82878530	82878809	279	82878658	15	7.52498	4.32857	5.65872	TetK27_peak_1053	Agfg1	ENSMUST00000190046.6	+	82839734	82895123	Intron 5	38796	-16314	0.005055	1.000000	---	ENSMUSG00000026159.13	Agfg1	protein_coding	OTTMUSG00000047960.1	OTTMUST00000123315.1	2	---	ENSMUSP00000140473.1	Agfg1-207	5	protein_coding
TetK27	chr1	82879275	82879784	509	82879485	20	11.7766	5.68125	9.81736	TetK27_peak_1054	Agfg1	ENSMUST00000186043.1	+	82840073	82880123	TTS	39202	-339	0.012734	1.000000	---	ENSMUSG00000026159.13	Agfg1	protein_coding	OTTMUSG00000047960.1	OTTMUST00000123316.1	2	---	ENSMUSP00000140678.1	Agfg1-203	5	protein_coding
TetK27	chr1	82880137	82880395	258	82880310	13	5.99569	3.7875	4.17465	TetK27_peak_1055	Agfg1	ENSMUST00000186043.1	+	82840073	82880123	TTS	40064	14	0.000000	0.000000	---	ENSMUSG00000026159.13	Agfg1	protein_coding	OTTMUSG00000047960.1	OTTMUST00000123316.1	2	---	ENSMUSP00000140678.1	Agfg1-203	5	protein_coding
TetK27	chr1	82893327	82893788	461	82893577	12	3.26591	2.4496	1.59523	TetK27_peak_1056	Agfg1	ENSMUST00000190046.6	+	82839734	82895123	CDS Exon 12	53593	-1335	0.008341	1.000000	---	ENSMUSG00000026159.13	Agfg1	protein_coding	OTTMUSG00000047960.1	OTTMUST00000123315.1	2	---	ENSMUSP00000140473.1	Agfg1-207	5	protein_coding
TetK27	chr1	82974229	82974867	638	82974471	20	11.7766	5.68125	9.81736	TetK27_peak_1057	.	.	.	.	.	Intergenic	.	.	.	.	.	.	.	.	.	.	.	.	.	.	.	.
TetK27	chr1	82975539	82976539	1000	82976166	27	18.5511	7.57499	16.4886	TetK27_peak_1058	.	.	.	.	.	Intergenic	.	.	.	.	.	.	.	.	.	.	.	.	.	.	.	.
TetK27	chr1	83005148	83008362	3214	83006980	149	187.765	35.459	184.643	TetK27_peak_1059	Gm7553	ENSMUST00000185805.1	-	83003482	83004908	TSS	-240	-1666	0.000000	0.000000	---	ENSMUSG00000101784.1	Gm7553	processed_pseudogene	OTTMUSG00000047961.1	OTTMUST00000123317.1	1	PGO:0000004	---	Gm7553-201		processed_pseudogene
TetK27	chr1	83037993	83038388	395	83038195	20	11.7766	5.68125	9.81736	TetK27_peak_1060	Slc19a3	ENSMUST00000045560.14	-	83012523	83038449	TSS	61	-25470	0.015274	1.000000	CCDS15101.1	ENSMUSG00000038496.16	Slc19a3	protein_coding	OTTMUSG00000022622.1	OTTMUST00000054192.1	2	---	ENSMUSP00000041683.8	Slc19a3-201	1	protein_coding
TetK27	chr1	83076341	83076612	271	83076406	12	5.2738	3.51696	3.47795	TetK27_peak_1061	.	.	.	.	.	Intergenic	.	.	.	.	.	.	.	.	.	.	.	.	.	.	.	.
TetK27	chr1	83076674	83077963	1289	83077725	27	18.5511	7.57499	16.4886	TetK27_peak_1062	.	.	.	.	.	Intergenic	.	.	.	.	.	.	.	.	.	.	.	.	.	.	.	.
TetK27	chr1	84742465	84742800	335	84742556	11	4.58302	3.24643	2.81413	TetK27_peak_1063	Trip12	ENSMUST00000186648.6	-	84724264	84839289	Intron 29	96489	-18201	0.002921	1.000000	---	ENSMUSG00000026219.14	Trip12	protein_coding	OTTMUSG00000048005.1	OTTMUST00000123404.1	2	---	ENSMUSP00000139563.1	Trip12-207	5	protein_coding
TetK27	chr1	84815974	84816880	906	84816410	18	10.0089	5.14017	8.08393	TetK27_peak_1064	Trip12	ENSMUST00000189496.6	-	84782827	84839302	5' UTR Exon	22422	-33147	0.016060	1.000000	---	ENSMUSG00000026219.14	Trip12	protein_coding	OTTMUSG00000048005.1	OTTMUST00000123417.1	2	---	ENSMUSP00000139682.1	Trip12-211	5	protein_coding
TetK27	chr1	84817070	84817845	775	84817656	31	22.7693	8.65714	20.656	TetK27_peak_1065	Trip12	ENSMUST00000189496.6	-	84782827	84839302	5' UTR Exon	21457	-34243	0.013740	1.000000	---	ENSMUSG00000026219.14	Trip12	protein_coding	OTTMUSG00000048005.1	OTTMUST00000123417.1	2	---	ENSMUSP00000139682.1	Trip12-211	5	protein_coding
TetK27	chr1	84818022	84818589	567	84818374	13	5.99569	3.7875	4.17465	TetK27_peak_1066	Trip12	ENSMUST00000189496.6	-	84782827	84839302	5' UTR Exon	20713	-35195	0.010057	1.000000	---	ENSMUSG00000026219.14	Trip12	protein_coding	OTTMUSG00000048005.1	OTTMUST00000123417.1	2	---	ENSMUSP00000139682.1	Trip12-211	5	protein_coding
TetK27	chr1	84818843	84819094	251	84818958	16	8.32904	4.5991	6.44257	TetK27_peak_1067	Trip12	ENSMUST00000189496.6	-	84782827	84839302	5' UTR Exon	20208	-36016	0.004462	1.000000	---	ENSMUSG00000026219.14	Trip12	protein_coding	OTTMUSG00000048005.1	OTTMUST00000123417.1	2	---	ENSMUSP00000139682.1	Trip12-211	5	protein_coding
TetK27	chr1	84836617	84836964	347	84836785	19	10.8823	5.41071	8.93972	TetK27_peak_1068	Trip12	ENSMUST00000189496.6	-	84782827	84839302	5' UTR Exon	2338	-53790	0.006162	1.000000	---	ENSMUSG00000026219.14	Trip12	protein_coding	OTTMUSG00000048005.1	OTTMUST00000123417.1	2	---	ENSMUSP00000139682.1	Trip12-211	5	protein_coding
TetK27	chr1	84837076	84837779	703	84837593	17	9.15743	4.86964	7.25158	TetK27_peak_1069	Trip12	ENSMUST00000189496.6	-	84782827	84839302	5' UTR Exon	1523	-54249	0.012465	1.000000	---	ENSMUSG00000026219.14	Trip12	protein_coding	OTTMUSG00000048005.1	OTTMUST00000123417.1	2	---	ENSMUSP00000139682.1	Trip12-211	5	protein_coding
TetK27	chr1	84837887	84840677	2790	84839459	154	156.502	22.3921	153.544	TetK27_peak_1070	Trip12	ENSMUST00000186648.6	-	84724264	84839289	TSS	0	-113623	0.012197	0.502687	---	ENSMUSG00000026219.14	Trip12	protein_coding	OTTMUSG00000048005.1	OTTMUST00000123404.1	2	---	ENSMUSP00000139563.1	Trip12-207	5	protein_coding
TetK27	chr1	85109136	85110397	1261	85109656	77	40.6691	6.94625	38.3902	TetK27_peak_1071	A530032D15Rik	ENSMUST00000160792.7	-	85088407	85109854	TSS	0	-20729	0.033523	0.569731	CCDS15107.1	ENSMUSG00000089844.7	A530032D15Rik	protein_coding	OTTMUSG00000029176.1	OTTMUST00000072362.1	2	---	ENSMUSP00000125122.1	A530032D15Rik-201	1	protein_coding
TetK27	chr1	85111093	85112393	1300	85111987	98	68.1789	10.5564	65.7099	TetK27_peak_1072	A530040E14Rik	ENSMUST00000161150.2	+	85111812	85114026	TSS	0	-1633	0.262754	0.447348	---	ENSMUSG00000072109.11	A530040E14Rik	antisense_RNA	OTTMUSG00000029171.1	---	3	---	---	A530040E14Rik-203	1	antisense_RNA
TetK27	chr1	85198894	85201092	2198	85199256	87	49.7922	7.8368	47.4442	TetK27_peak_1073	Gm7609	ENSMUST00000113402.3	+	85199708	85213787	TSS	0	-12695	0.098366	0.629832	---	ENSMUSG00000079457.9	Gm7609	transcribed_unprocessed_pseudogene	OTTMUSG00000029172.1	OTTMUST00000072355.1	2	---	---	Gm7609-201	1	processed_transcript
TetK27	chr1	85269794	85271033	1239	85270458	53	32.0887	7.7745	29.8837	TetK27_peak_1074	C130026I21Rik	ENSMUST00000159582.7	-	85245640	85270144	TSS	0	-24154	0.014324	0.283065	---	ENSMUSG00000052477.15	C130026I21Rik	protein_coding	OTTMUSG00000029174.1	OTTMUST00000072722.1	2	---	ENSMUSP00000125160.1	C130026I21Rik-204	5	protein_coding
TetK27	chr1	85271842	85272884	1042	85272417	64	27.2804	5.28205	25.1208	TetK27_peak_1075	Gm16026	ENSMUST00000159849.7	+	85272359	85273489	TSS	0	-605	0.465075	0.504314	---	ENSMUSG00000079455.9	Gm16026	transcribed_unprocessed_pseudogene	OTTMUSG00000029178.1	OTTMUST00000072364.1	2	PGO:0000005 | PGO:0000019	---	Gm16026-203		transcribed_unprocessed_pseudogene
TetK27	chr1	85273126	85273568	442	85273389	29	5.95476	2.54941	4.15239	TetK27_peak_1076	Gm16026	ENSMUST00000159849.7	+	85272359	85273489	TTS	767	0	0.321839	0.821670	---	ENSMUSG00000079455.9	Gm16026	transcribed_unprocessed_pseudogene	OTTMUSG00000029178.1	OTTMUST00000072364.1	2	PGO:0000005 | PGO:0000019	---	Gm16026-203		transcribed_unprocessed_pseudogene
TetK27	chr1	85324301	85325626	1325	85325328	40	16.7467	4.8025	14.71	TetK27_peak_1077	Gm2619	ENSMUST00000162276.9	-	85308659	85327286	Intron 1	1660	-15642	0.071183	1.000000	---	ENSMUSG00000091199.9	Gm2619	transcribed_unprocessed_pseudogene	OTTMUSG00000033618.1	OTTMUST00000084707.1	2	---	---	Gm2619-201	5	processed_transcript
TetK27	chr1	85325769	85328043	2274	85326502	65	46.6152	10.2823	44.2931	TetK27_peak_1078	Gm16025	ENSMUST00000161282.1	+	85326738	85326922	TSS	0	0	1.000000	0.081319	---	ENSMUSG00000089652.1	Gm16025	lincRNA	OTTMUSG00000029168.1	OTTMUST00000072348.1	2	---	---	Gm16025-201		lincRNA
TetK27	chr1	85328182	85328456	274	85328272	20	6.5737	3.28962	4.74696	TetK27_peak_1079	Gm2619	ENSMUST00000166777.3	-	85156809	85327307	TSS	-875	-171373	0.000000	0.000000	---	ENSMUSG00000091199.9	Gm2619	transcribed_unprocessed_pseudogene	OTTMUSG00000033618.1	OTTMUST00000084705.1	2	PGO:0000005 | PGO:0000019	---	Gm2619-202		transcribed_unprocessed_pseudogene
TetK27	chr1	85525628	85528193	2565	85526741	103	72.4555	10.8176	69.9588	TetK27_peak_1080	Gm16092	ENSMUST00000161449.1	-	85511133	85527162	TSS	0	-14495	0.095758	0.598207	---	ENSMUSG00000089714.1	Gm16092	lincRNA	OTTMUSG00000030127.1	OTTMUST00000074898.1	2	---	---	Gm16092-201	5	lincRNA
TetK27	chr1	85528485	85529595	1110	85528904	49	21.3839	5.20077	19.2937	TetK27_peak_1081	Gm7592	ENSMUST00000160674.1	+	85526690	85550578	Intron 1	1795	-20983	0.046507	1.000000	---	ENSMUSG00000090186.5	Gm7592	transcribed_unprocessed_pseudogene	OTTMUSG00000030062.1	OTTMUST00000074564.1	2	PGO:0000005 | PGO:0000019	---	Gm7592-201		transcribed_unprocessed_pseudogene
TetK27	chr1	85597404	85597807	403	85597724	30	6.16448	2.56606	4.34244	TetK27_peak_1082	Sp110	ENSMUST00000130727.1	-	85597718	85598780	TTS	973	0	0.084666	0.222772	---	ENSMUSG00000070034.13	Sp110	protein_coding	OTTMUSG00000024589.1	OTTMUST00000060411.1	2	---	---	Sp110-203	5	processed_transcript
TetK27	chr1	85597865	85599269	1404	85598571	129	76.8534	8.668	74.3254	TetK27_peak_1083	Sp110	ENSMUST00000130727.1	-	85597718	85598780	TSS	0	-147	0.861712	0.651957	---	ENSMUSG00000070034.13	Sp110	protein_coding	OTTMUSG00000024589.1	OTTMUST00000060411.1	2	---	---	Sp110-203	5	processed_transcript
TetK27	chr1	85599984	85601768	1784	85600854	147	118.061	14.1502	115.303	TetK27_peak_1084	Sp140	ENSMUST00000080204.10	+	85600703	85645038	TSS	0	-43270	0.024044	0.597199	CCDS35638.1	ENSMUSG00000070031.11	Sp140	protein_coding	OTTMUSG00000030222.1	OTTMUST00000074815.1	2	---	ENSMUSP00000079095.4	Sp140-201	1	protein_coding
TetK27	chr1	85649212	85652508	3296	85650066	93	80.6475	15.0566	78.1004	TetK27_peak_1085	Sp100	ENSMUST00000066427.10	+	85650050	85709999	TSS	0	-57491	0.041018	0.745830	CCDS35639.1	ENSMUSG00000026222.16	Sp100	protein_coding	OTTMUSG00000030061.1	OTTMUST00000074556.1	2	---	ENSMUSP00000066399.4	Sp100-202	1	protein_coding
TetK27	chr1	85655120	85655430	310	85655246	18	6.18411	3.30831	4.36206	TetK27_peak_1086	Sp100	ENSMUST00000150967.7	+	85650015	85701140	Intron 1	5105	-45710	0.006083	1.000000	---	ENSMUSG00000026222.16	Sp100	protein_coding	OTTMUSG00000030061.1	OTTMUST00000074555.1	2	---	ENSMUSP00000122899.1	Sp100-211	1	protein_coding
TetK27	chr1	85667730	85668460	730	85667900	12	5.2738	3.51696	3.47795	TetK27_peak_1087	Sp100	ENSMUST00000150967.7	+	85650015	85701140	Intron 6	17715	-32680	0.014298	1.000000	---	ENSMUSG00000026222.16	Sp100	protein_coding	OTTMUSG00000030061.1	OTTMUST00000074555.1	2	---	ENSMUSP00000122899.1	Sp100-211	1	protein_coding
TetK27	chr1	85669207	85669460	253	85669265	14	6.74667	4.05803	4.90229	TetK27_peak_1088	Sp100	ENSMUST00000150967.7	+	85650015	85701140	Intron 6	19192	-31680	0.004968	1.000000	---	ENSMUSG00000026222.16	Sp100	protein_coding	OTTMUSG00000030061.1	OTTMUST00000074555.1	2	---	ENSMUSP00000122899.1	Sp100-211	1	protein_coding
TetK27	chr1	85684968	85688122	3154	85687262	82	89.9982	22.4545	87.3929	TetK27_peak_1089	Sp100	ENSMUST00000145440.7	+	85650008	85696369	3' UTR Exon	34960	-8247	0.068051	1.000000	---	ENSMUSG00000026222.16	Sp100	protein_coding	OTTMUSG00000030061.1	OTTMUST00000074497.1	2	---	ENSMUSP00000120604.1	Sp100-209	2	nonsense_mediated_decay
TetK27	chr1	85688277	85688721	444	85688553	25	16.5309	7.03392	14.4964	TetK27_peak_1090	Sp100	ENSMUST00000145440.7	+	85650008	85696369	3' UTR Exon	38269	-7648	0.009598	1.000000	---	ENSMUSG00000026222.16	Sp100	protein_coding	OTTMUSG00000030061.1	OTTMUST00000074497.1	2	---	ENSMUSP00000120604.1	Sp100-209	2	nonsense_mediated_decay
TetK27	chr1	85689796	85690084	288	85689941	13	5.99569	3.7875	4.17465	TetK27_peak_1091	Sp100	ENSMUST00000145440.7	+	85650008	85696369	3' UTR Exon	39788	-6285	0.006234	1.000000	---	ENSMUSG00000026222.16	Sp100	protein_coding	OTTMUSG00000030061.1	OTTMUST00000074497.1	2	---	ENSMUSP00000120604.1	Sp100-209	2	nonsense_mediated_decay
TetK27	chr1	85697505	85697942	437	85697701	15	7.52498	4.32857	5.65872	TetK27_peak_1092	Sp100	ENSMUST00000150967.7	+	85650015	85701140	Intron 12	47490	-3198	0.008567	1.000000	---	ENSMUSG00000026222.16	Sp100	protein_coding	OTTMUSG00000030061.1	OTTMUST00000074555.1	2	---	ENSMUSP00000122899.1	Sp100-211	1	protein_coding
TetK27	chr1	85698953	85699423	470	85699091	15	7.52498	4.32857	5.65872	TetK27_peak_1093	Sp100	ENSMUST00000134283.1	+	85693939	85699672	TTS	5014	-249	0.082142	1.000000	---	ENSMUSG00000026222.16	Sp100	protein_coding	OTTMUSG00000030061.1	OTTMUST00000074560.1	2	---	---	Sp100-205	3	retained_intron
TetK27	chr1	85700642	85701052	410	85700843	14	6.74667	4.05803	4.90229	TetK27_peak_1094	Sp100	ENSMUST00000147552.7	+	85650014	85701573	TTS	50628	-521	0.007971	1.000000	CCDS83569.1	ENSMUSG00000026222.16	Sp100	protein_coding	OTTMUSG00000030061.1	OTTMUST00000074495.1	2	---	ENSMUSP00000116942.1	Sp100-210	1	protein_coding
TetK27	chr1	85701727	85704676	2949	85703497	130	156.389	30.8732	153.432	TetK27_peak_1095	Sp100	ENSMUST00000141709.1	+	85703442	85707996	TSS	0	-3320	0.271131	0.418644	---	ENSMUSG00000026222.16	Sp100	protein_coding	OTTMUSG00000030061.1	OTTMUST00000074562.1	1	---	ENSMUSP00000119301.1	Sp100-207	5	protein_coding
TetK27	chr1	85731940	85734079	2139	85732988	26	17.5331	7.30446	15.4838	TetK27_peak_1096	A630001G21Rik	ENSMUST00000162038.7	-	85717692	85736582	5' UTR Exon	2503	-14248	0.113281	1.000000	---	ENSMUSG00000052760.15	A630001G21Rik	protein_coding	OTTMUSG00000034229.1	OTTMUST00000086920.1	2	---	ENSMUSP00000125643.1	A630001G21Rik-206	2	nonsense_mediated_decay
TetK27	chr1	85734219	85734865	646	85734352	13	4.38771	2.93587	2.64425	TetK27_peak_1097	A630001G21Rik	ENSMUST00000162038.7	-	85717692	85736582	5' UTR Exon	1717	-16527	0.034249	1.000000	---	ENSMUSG00000052760.15	A630001G21Rik	protein_coding	OTTMUSG00000034229.1	OTTMUST00000086920.1	2	---	ENSMUSP00000125643.1	A630001G21Rik-206	2	nonsense_mediated_decay
TetK27	chr1	85734917	85737033	2116	85736168	168	232.992	45.7205	229.617	TetK27_peak_1098	A630001G21Rik	ENSMUST00000159325.1	-	85726614	85736562	TSS	0	-8303	0.165444	0.777515	---	ENSMUSG00000052760.15	A630001G21Rik	protein_coding	OTTMUSG00000034229.1	OTTMUST00000086931.1	2	---	---	A630001G21Rik-204	5	processed_transcript
TetK27	chr1	85738206	85738521	315	85738329	12	5.2738	3.51696	3.47795	TetK27_peak_1099	A630001G21Rik	ENSMUST00000159122.7	-	85717083	85778644	5' UTR Exon	40123	-21123	0.005133	1.000000	CCDS48299.1	ENSMUSG00000052760.15	A630001G21Rik	protein_coding	OTTMUSG00000034229.1	OTTMUST00000086918.1	2	---	ENSMUSP00000124137.1	A630001G21Rik-202	1	protein_coding
TetK27	chr1	85739341	85740532	1191	85740301	24	15.0487	6.51421	13.0397	TetK27_peak_1100	A630001G21Rik	ENSMUST00000159122.7	-	85717083	85778644	5' UTR Exon	38112	-22258	0.019363	1.000000	CCDS48299.1	ENSMUSG00000052760.15	A630001G21Rik	protein_coding	OTTMUSG00000034229.1	OTTMUST00000086918.1	2	---	ENSMUSP00000124137.1	A630001G21Rik-202	1	protein_coding
TetK27	chr1	85749089	85753720	4631	85751308	184	247.802	43.7328	244.335	TetK27_peak_1101	Mir8096	ENSMUST00000184526.1	+	85751948	85752075	TSS	0	0	1.000000	0.027634	---	ENSMUSG00000098634.1	Mir8096	miRNA	---	---	3	---	---	Mir8096-201		miRNA
TetK27	chr1	85756591	85759191	2600	85758590	74	78.2415	20.2902	75.705	TetK27_peak_1102	A630001G21Rik	ENSMUST00000159122.7	-	85717083	85778644	5' UTR Exon	19453	-39508	0.042250	1.000000	CCDS48299.1	ENSMUSG00000052760.15	A630001G21Rik	protein_coding	OTTMUSG00000034229.1	OTTMUST00000086918.1	2	---	ENSMUSP00000124137.1	A630001G21Rik-202	1	protein_coding
TetK27	chr1	85759932	85760579	647	85760350	19	10.8823	5.41071	8.93972	TetK27_peak_1103	A630001G21Rik	ENSMUST00000159122.7	-	85717083	85778644	5' UTR Exon	18065	-42849	0.010526	1.000000	CCDS48299.1	ENSMUSG00000052760.15	A630001G21Rik	protein_coding	OTTMUSG00000034229.1	OTTMUST00000086918.1	2	---	ENSMUSP00000124137.1	A630001G21Rik-202	1	protein_coding
TetK27	chr1	85760848	85764024	3176	85762222	70	72.4987	19.208	69.9976	TetK27_peak_1104	Gm25472	ENSMUST00000175454.3	+	85763794	85763872	TSS	0	0	1.000000	0.024866	---	ENSMUSG00000094834.1	Gm25472	miRNA	---	---	3	---	---	Gm25472-201		miRNA
TetK27	chr1	85793014	85796159	3145	85793640	298	301.965	24.2974	298.12	TetK27_peak_1105	Cab39	ENSMUST00000097666.3	+	85794511	85850366	TSS	0	-54207	0.029522	0.524158	CCDS15112.1	ENSMUSG00000036707.16	Cab39	protein_coding	OTTMUSG00000021589.1	OTTMUST00000051257.1	2	---	ENSMUSP00000095270.2	Cab39-201	5	protein_coding
TetK27	chr1	85796598	85797008	410	85796846	17	9.15743	4.86964	7.25158	TetK27_peak_1106	Cab39	ENSMUST00000097666.3	+	85794511	85850366	5' UTR Exon	2087	-53358	0.007358	1.000000	CCDS15112.1	ENSMUSG00000036707.16	Cab39	protein_coding	OTTMUSG00000021589.1	OTTMUST00000051257.1	2	---	ENSMUSP00000095270.2	Cab39-201	5	protein_coding
TetK27	chr1	85806214	85806465	251	85806351	15	7.52498	4.32857	5.65872	TetK27_peak_1107	Cab39	ENSMUST00000097666.3	+	85794511	85850366	5' UTR Exon	11703	-43901	0.004512	1.000000	CCDS15112.1	ENSMUSG00000036707.16	Cab39	protein_coding	OTTMUSG00000021589.1	OTTMUST00000051257.1	2	---	ENSMUSP00000095270.2	Cab39-201	5	protein_coding
TetK27	chr1	85808449	85808711	262	85808531	12	4.46559	3.07312	2.71949	TetK27_peak_1108	Cab39	ENSMUST00000097666.3	+	85794511	85850366	5' UTR Exon	13938	-41655	0.004709	1.000000	CCDS15112.1	ENSMUSG00000036707.16	Cab39	protein_coding	OTTMUSG00000021589.1	OTTMUST00000051257.1	2	---	ENSMUSP00000095270.2	Cab39-201	5	protein_coding
TetK27	chr1	85813636	85814155	519	85813813	15	7.22704	4.1691	5.37763	TetK27_peak_1109	Cab39	ENSMUST00000097666.3	+	85794511	85850366	5' UTR Exon	19125	-36211	0.009310	1.000000	CCDS15112.1	ENSMUSG00000036707.16	Cab39	protein_coding	OTTMUSG00000021589.1	OTTMUST00000051257.1	2	---	ENSMUSP00000095270.2	Cab39-201	5	protein_coding
TetK27	chr1	85834571	85835096	525	85834894	12	5.2738	3.51696	3.47795	TetK27_peak_1110	Cab39	ENSMUST00000097666.3	+	85794511	85850366	Intron 3	40060	-15270	0.009417	1.000000	CCDS15112.1	ENSMUSG00000036707.16	Cab39	protein_coding	OTTMUSG00000021589.1	OTTMUST00000051257.1	2	---	ENSMUSP00000095270.2	Cab39-201	5	protein_coding
TetK27	chr1	85835396	85835648	252	85835495	14	6.73409	4.05117	4.90229	TetK27_peak_1111	Cab39	ENSMUST00000097666.3	+	85794511	85850366	CDS Exon 4	40885	-14718	0.004530	1.000000	CCDS15112.1	ENSMUSG00000036707.16	Cab39	protein_coding	OTTMUSG00000021589.1	OTTMUST00000051257.1	2	---	ENSMUSP00000095270.2	Cab39-201	5	protein_coding
TetK27	chr1	85837609	85841551	3942	85837952	42	35.4012	11.633	33.1647	TetK27_peak_1112	Cab39	ENSMUST00000097666.3	+	85794511	85850366	Intron 5	43098	-8815	0.070592	1.000000	CCDS15112.1	ENSMUSG00000036707.16	Cab39	protein_coding	OTTMUSG00000021589.1	OTTMUST00000051257.1	2	---	ENSMUSP00000095270.2	Cab39-201	5	protein_coding
TetK27	chr1	85844172	85844494	322	85844299	15	7.52498	4.32857	5.65872	TetK27_peak_1113	Cab39	ENSMUST00000187623.1	+	85843080	85846071	CDS Exon 1	1092	-1577	0.107955	1.000000	---	ENSMUSG00000036707.16	Cab39	protein_coding	OTTMUSG00000021589.1	OTTMUST00000123468.1	2	---	---	Cab39-205		retained_intron
TetK27	chr1	85844810	85846318	1508	85845354	50	38.4095	10.695	36.1498	TetK27_peak_1114	Cab39	ENSMUST00000187623.1	+	85843080	85846071	TTS	1730	0	0.421791	0.836315	---	ENSMUSG00000036707.16	Cab39	protein_coding	OTTMUSG00000021589.1	OTTMUST00000123468.1	2	---	---	Cab39-205		retained_intron
TetK27	chr1	85852986	85853254	268	85853133	17	7.96295	4.25508	6.09287	TetK27_peak_1115	.	.	.	.	.	Intergenic	.	.	.	.	.	.	.	.	.	.	.	.	.	.	.	.
TetK27	chr1	85893897	85897812	3915	85895362	145	181.115	34.5134	178.028	TetK27_peak_1116	Itm2c	ENSMUST00000027425.15	+	85894281	85908676	TSS	0	-10864	0.245346	0.901941	CCDS35641.1	ENSMUSG00000026223.15	Itm2c	protein_coding	OTTMUSG00000029979.1	OTTMUST00000074348.1	2	---	ENSMUSP00000027425.9	Itm2c-201	1	protein_coding
TetK27	chr1	85898080	85899167	1087	85898289	15	7.52498	4.32857	5.65872	TetK27_peak_1117	Itm2c	ENSMUST00000027425.15	+	85894281	85908676	Intron 1	3799	-9509	0.075577	1.000000	CCDS35641.1	ENSMUSG00000026223.15	Itm2c	protein_coding	OTTMUSG00000029979.1	OTTMUST00000074348.1	2	---	ENSMUSP00000027425.9	Itm2c-201	1	protein_coding
TetK27	chr1	85899604	85899995	391	85899826	20	11.7766	5.68125	9.81736	TetK27_peak_1118	Itm2c	ENSMUST00000027425.15	+	85894281	85908676	Intron 1	5323	-8681	0.027230	1.000000	CCDS35641.1	ENSMUSG00000026223.15	Itm2c	protein_coding	OTTMUSG00000029979.1	OTTMUST00000074348.1	2	---	ENSMUSP00000027425.9	Itm2c-201	1	protein_coding
TetK27	chr1	85900256	85900973	717	85900659	21	12.6908	5.95178	10.7156	TetK27_peak_1119	Itm2c	ENSMUST00000027425.15	+	85894281	85908676	Intron 1	5975	-7703	0.049875	1.000000	CCDS35641.1	ENSMUSG00000026223.15	Itm2c	protein_coding	OTTMUSG00000029979.1	OTTMUST00000074348.1	2	---	ENSMUSP00000027425.9	Itm2c-201	1	protein_coding
TetK27	chr1	85901838	85902158	320	85901935	11	3.85142	2.83672	2.13865	TetK27_peak_1120	Itm2c	ENSMUST00000027425.15	+	85894281	85908676	Intron 1	7557	-6518	0.022298	1.000000	CCDS35641.1	ENSMUSG00000026223.15	Itm2c	protein_coding	OTTMUSG00000029979.1	OTTMUST00000074348.1	2	---	ENSMUSP00000027425.9	Itm2c-201	1	protein_coding
TetK27	chr1	85902212	85902463	251	85902368	10	3.92564	2.97589	2.18676	TetK27_peak_1121	Itm2c	ENSMUST00000027425.15	+	85894281	85908676	Intron 1	7931	-6213	0.017505	1.000000	CCDS35641.1	ENSMUSG00000026223.15	Itm2c	protein_coding	OTTMUSG00000029979.1	OTTMUST00000074348.1	2	---	ENSMUSP00000027425.9	Itm2c-201	1	protein_coding
TetK27	chr1	85902736	85904295	1559	85903430	29	20.6319	8.11607	18.5431	TetK27_peak_1122	Itm2c	ENSMUST00000027425.15	+	85894281	85908676	CDS Exon 2	8455	-4381	0.108363	1.000000	CCDS35641.1	ENSMUSG00000026223.15	Itm2c	protein_coding	OTTMUSG00000029979.1	OTTMUST00000074348.1	2	---	ENSMUSP00000027425.9	Itm2c-201	1	protein_coding
TetK27	chr1	85952403	85954453	2050	85954206	32	22.5753	8.30629	20.4702	TetK27_peak_1123	Gpr55	ENSMUST00000086975.5	-	85938318	85961008	5' UTR Exon	6555	-14085	0.090388	1.000000	CCDS15115.1	ENSMUSG00000049608.8	Gpr55	protein_coding	OTTMUSG00000048041.1	OTTMUST00000123474.1	2	---	ENSMUSP00000084196.4	Gpr55-201	1	protein_coding
TetK27	chr1	85955527	85961374	5847	85960913	61	59.9416	16.7732	57.5219	TetK27_peak_1124	Gpr55	ENSMUST00000086975.5	-	85938318	85961008	TSS	0	-17209	0.241594	0.937415	CCDS15115.1	ENSMUSG00000049608.8	Gpr55	protein_coding	OTTMUSG00000048041.1	OTTMUST00000123474.1	2	---	ENSMUSP00000084196.4	Gpr55-201	1	protein_coding
TetK27	chr1	85961603	85962350	747	85962132	14	4.99608	3.14557	3.22361	TetK27_peak_1125	Gpr55	ENSMUST00000086975.5	-	85938318	85961008	TSS	-595	-23285	0.000000	0.000000	CCDS15115.1	ENSMUSG00000049608.8	Gpr55	protein_coding	OTTMUSG00000048041.1	OTTMUST00000123474.1	2	---	ENSMUSP00000084196.4	Gpr55-201	1	protein_coding
TetK27	chr1	85997940	85998307	367	85998111	16	8.32904	4.5991	6.44257	TetK27_peak_1126	.	.	.	.	.	Intergenic	.	.	.	.	.	.	.	.	.	.	.	.	.	.	.	.
TetK27	chr1	85999892	86000191	299	86000066	14	5.78446	3.5459	3.98249	TetK27_peak_1127	.	.	.	.	.	Intergenic	.	.	.	.	.	.	.	.	.	.	.	.	.	.	.	.
TetK27	chr1	86007452	86007782	330	86007605	13	5.99569	3.7875	4.17465	TetK27_peak_1128	.	.	.	.	.	Intergenic	.	.	.	.	.	.	.	.	.	.	.	.	.	.	.	.
TetK27	chr1	86015700	86016020	320	86015934	60	58.5796	16.5027	56.1688	TetK27_peak_1129	Spata3	ENSMUST00000129169.1	+	86016816	86024670	TSS	-796	-8650	0.000000	0.000000	---	ENSMUSG00000026226.16	Spata3	protein_coding	OTTMUSG00000026756.1	OTTMUST00000066178.1	2	---	---	Spata3-204	3	processed_transcript
TetK27	chr1	86045929	86046568	639	86046159	22	7.09619	3.32269	5.24944	TetK27_peak_1130	2810459M11Rik	ENSMUST00000027429.10	+	86045863	86053354	TSS	66	-6786	0.085424	1.000000	CCDS78641.1	ENSMUSG00000026227.11	2810459M11Rik	protein_coding	OTTMUSG00000022123.1	OTTMUST00000122942.1	2	---	ENSMUSP00000027429.5	2810459M11Rik-201	1	protein_coding
TetK27	chr1	86064021	86065555	1534	86064858	182	212.761	31.3069	209.502	TetK27_peak_1131	Psmd1	ENSMUST00000189234.1	+	86064641	86067663	TSS	0	-2108	0.302679	0.596091	---	ENSMUSG00000026229.17	Psmd1	protein_coding	OTTMUSG00000033949.1	OTTMUST00000123477.1	2	---	---	Psmd1-209		retained_intron
TetK27	chr1	86153515	86155401	1886	86154450	129	162.147	33.8739	159.157	TetK27_peak_1132	Armc9	ENSMUST00000027434.14	+	86154810	86278285	TSS	0	-122884	0.004794	0.313725	CCDS15118.1	ENSMUSG00000062590.13	Armc9	protein_coding	OTTMUSG00000033936.1	OTTMUST00000085606.1	2	---	ENSMUSP00000027434.8	Armc9-201	1	protein_coding
TetK27	chr1	86228299	86229693	1394	86229255	32	23.8582	8.92767	21.733	TetK27_peak_1133	Armc9	ENSMUST00000027434.14	+	86154810	86278285	Intron 19	73489	-48592	0.011298	1.000000	CCDS15118.1	ENSMUSG00000062590.13	Armc9	protein_coding	OTTMUSG00000033936.1	OTTMUST00000085606.1	2	---	ENSMUSP00000027434.8	Armc9-201	1	protein_coding
TetK27	chr1	86343801	86345423	1622	86344428	47	41.563	12.9857	39.2757	TetK27_peak_1134	Ncl	ENSMUST00000027438.7	-	86344719	86359401	TTS	13978	0	0.048015	0.434381	CCDS35646.1	ENSMUSG00000026234.12	Ncl	protein_coding	OTTMUSG00000048094.1	OTTMUST00000123563.1	2	---	ENSMUSP00000027438.6	Ncl-201	1	protein_coding
TetK27	chr1	86358161	86360641	2480	86359183	277	397.131	56.5177	392.401	TetK27_peak_1135	Ncl	ENSMUST00000027438.7	-	86344719	86359401	TSS	0	-13442	0.084520	0.500202	CCDS35646.1	ENSMUSG00000026234.12	Ncl	protein_coding	OTTMUSG00000048094.1	OTTMUST00000123563.1	2	---	ENSMUSP00000027438.6	Ncl-201	1	protein_coding
TetK27	chr1	86393000	86393988	988	86393715	38	30.6499	10.5509	28.4563	TetK27_peak_1136	Nmur1	ENSMUST00000212614.1	-	86387847	86398191	5' UTR Exon	4203	-5153	0.095602	1.000000	---	ENSMUSG00000026237.5	Nmur1	protein_coding	OTTMUSG00000022669.1	OTTMUST00000150424.1	2	---	ENSMUSP00000148827.1	Nmur1-204	3	protein_coding
TetK27	chr1	86394132	86395078	946	86394303	31	22.7693	8.65714	20.656	TetK27_peak_1137	Nmur1	ENSMUST00000212614.1	-	86387847	86398191	5' UTR Exon	3113	-6285	0.091542	1.000000	---	ENSMUSG00000026237.5	Nmur1	protein_coding	OTTMUSG00000022669.1	OTTMUST00000150424.1	2	---	ENSMUSP00000148827.1	Nmur1-204	3	protein_coding
TetK27	chr1	86395140	86395658	518	86395239	15	7.52498	4.32857	5.65872	TetK27_peak_1138	Nmur1	ENSMUST00000212614.1	-	86387847	86398191	5' UTR Exon	2533	-7293	0.050169	1.000000	---	ENSMUSG00000026237.5	Nmur1	protein_coding	OTTMUSG00000022669.1	OTTMUST00000150424.1	2	---	ENSMUSP00000148827.1	Nmur1-204	3	protein_coding
TetK27	chr1	86433385	86435597	2212	86434736	271	375.06	51.2533	370.558	TetK27_peak_1139	.	.	.	.	.	Intergenic	.	.	.	.	.	.	.	.	.	.	.	.	.	.	.	.
TetK27	chr1	86440579	86443870	3291	86442399	191	218.508	30.0765	215.218	TetK27_peak_1140	.	.	.	.	.	Intergenic	.	.	.	.	.	.	.	.	.	.	.	.	.	.	.	.
TetK27	chr1	86443948	86444549	601	86444243	18	10.0089	5.14017	8.08393	TetK27_peak_1141	.	.	.	.	.	Intergenic	.	.	.	.	.	.	.	.	.	.	.	.	.	.	.	.
TetK27	chr1	86486662	86489121	2459	86487928	197	194.166	21.8168	191.009	TetK27_peak_1142	.	.	.	.	.	Intergenic	.	.	.	.	.	.	.	.	.	.	.	.	.	.	.	.
TetK27	chr1	86500969	86501829	860	86501406	40	25.347	7.72567	23.2094	TetK27_peak_1143	.	.	.	.	.	Intergenic	.	.	.	.	.	.	.	.	.	.	.	.	.	.	.	.
TetK27	chr1	86502575	86502839	264	86502716	15	6.48548	3.7823	4.65898	TetK27_peak_1144	.	.	.	.	.	Intergenic	.	.	.	.	.	.	.	.	.	.	.	.	.	.	.	.
TetK27	chr1	86503033	86505862	2829	86504349	231	292.718	39.6897	288.944	TetK27_peak_1145	.	.	.	.	.	Intergenic	.	.	.	.	.	.	.	.	.	.	.	.	.	.	.	.
TetK27	chr1	86509308	86509886	578	86509672	15	7.22704	4.1691	5.37763	TetK27_peak_1146	.	.	.	.	.	Intergenic	.	.	.	.	.	.	.	.	.	.	.	.	.	.	.	.
TetK27	chr1	86515919	86516220	301	86516064	14	6.74667	4.05803	4.90229	TetK27_peak_1147	.	.	.	.	.	Intergenic	.	.	.	.	.	.	.	.	.	.	.	.	.	.	.	.
TetK27	chr1	86524806	86530133	5327	86525962	202	266.477	42.5701	262.89	TetK27_peak_1148	Ptma	ENSMUST00000045897.14	+	86526726	86530713	TSS	0	-580	0.854564	0.639640	CCDS35649.1	ENSMUSG00000026238.14	Ptma	protein_coding	OTTMUSG00000048097.1	OTTMUST00000123572.1	2	---	ENSMUSP00000044188.8	Ptma-201	1	protein_coding
TetK27	chr1	86581687	86583174	1487	86582409	276	346.475	40.0168	342.246	TetK27_peak_1149	Pde6d	ENSMUST00000027444.14	-	86542994	86582548	TSS	0	-38693	0.021792	0.579301	CCDS15121.1	ENSMUSG00000026239.14	Pde6d	protein_coding	OTTMUSG00000021876.1	OTTMUST00000051929.1	2	---	ENSMUSP00000027444.8	Pde6d-201	1	protein_coding
TetK27	chr1	86586694	86587878	1184	86587222	109	110.295	20.7274	107.579	TetK27_peak_1150	Cops7b	ENSMUST00000027446.10	+	86587100	86606501	TSS	0	-18623	0.040150	0.657384	CCDS15122.1	ENSMUSG00000026240.12	Cops7b	protein_coding	OTTMUSG00000027307.1	---	3	---	ENSMUSP00000027446.4	Cops7b-201	1	protein_coding
TetK27	chr1	86593897	86595567	1670	86594349	36	28.339	10.0098	26.168	TetK27_peak_1151	Cops7b	ENSMUST00000027446.10	+	86587100	86606501	Intron 3	6797	-10934	0.086125	1.000000	CCDS15122.1	ENSMUSG00000026240.12	Cops7b	protein_coding	OTTMUSG00000027307.1	---	3	---	ENSMUSP00000027446.4	Cops7b-201	1	protein_coding
TetK27	chr1	86703163	86704456	1293	86703885	133	150.506	27.2423	147.578	TetK27_peak_1152	Dis3l2	ENSMUST00000189044.6	+	86703828	86882440	TSS	0	-177984	0.003522	0.486090	---	ENSMUSG00000053333.15	Dis3l2	protein_coding	OTTMUSG00000048134.1	OTTMUST00000123634.1	2	---	---	Dis3l2-205	1	retained_intron
TetK27	chr1	87078209	87078842	633	87078688	22	13.6241	6.22232	11.6331	TetK27_peak_1153	.	.	.	.	.	Intergenic	.	.	.	.	.	.	.	.	.	.	.	.	.	.	.	.
TetK27	chr1	87131898	87133447	1549	87132170	51	42.8021	12.2925	40.5099	TetK27_peak_1154	.	.	.	.	.	Intergenic	.	.	.	.	.	.	.	.	.	.	.	.	.	.	.	.
TetK27	chr1	87154238	87155048	810	87154437	28	15.3865	5.89573	13.3764	TetK27_peak_1155	Ecel1	ENSMUST00000027463.10	-	87147658	87155028	TSS	0	-6580	0.107312	0.975339	CCDS15128.1	ENSMUSG00000026247.13	Ecel1	protein_coding	OTTMUSG00000034823.1	---	3	---	ENSMUSP00000027463.4	Ecel1-201	1	protein_coding
TetK27	chr1	87180504	87181434	930	87180719	17	9.15743	4.86964	7.25158	TetK27_peak_1156	.	.	.	.	.	Intergenic	.	.	.	.	.	.	.	.	.	.	.	.	.	.	.	.
TetK27	chr1	87212967	87215471	2504	87214092	337	416.412	39.5914	411.463	TetK27_peak_1157	Eif4e2	ENSMUST00000113232.7	+	87213914	87226608	TSS	0	-11137	0.122725	0.621956	---	ENSMUSG00000026254.17	Eif4e2	protein_coding	OTTMUSG00000021766.1	OTTMUST00000051663.1	2	---	ENSMUSP00000108858.1	Eif4e2-205	1	protein_coding
TetK27	chr1	87215779	87216215	436	87215883	13	5.29632	3.40796	3.50021	TetK27_peak_1158	Eif4e2	ENSMUST00000113235.7	+	87213914	87240489	Intron 1	1865	-24274	0.016443	1.000000	CCDS83571.1	ENSMUSG00000026254.17	Eif4e2	protein_coding	OTTMUSG00000021766.1	OTTMUST00000051665.1	2	---	ENSMUSP00000108861.1	Eif4e2-207	5	protein_coding
TetK27	chr1	87216763	87217022	259	87216803	12	5.2738	3.51696	3.47795	TetK27_peak_1159	Eif4e2	ENSMUST00000113235.7	+	87213914	87240489	Intron 1	2849	-23467	0.009783	1.000000	CCDS83571.1	ENSMUSG00000026254.17	Eif4e2	protein_coding	OTTMUSG00000021766.1	OTTMUST00000051665.1	2	---	ENSMUSP00000108861.1	Eif4e2-207	5	protein_coding
TetK27	chr1	87217239	87218498	1259	87217957	24	15.5448	6.76339	13.5242	TetK27_peak_1160	Eif4e2	ENSMUST00000113235.7	+	87213914	87240489	Intron 1	3325	-21991	0.047411	1.000000	CCDS83571.1	ENSMUSG00000026254.17	Eif4e2	protein_coding	OTTMUSG00000021766.1	OTTMUST00000051665.1	2	---	ENSMUSP00000108861.1	Eif4e2-207	5	protein_coding
TetK27	chr1	87246132	87246522	390	87246314	19	10.8823	5.41071	8.93972	TetK27_peak_1161	.	.	.	.	.	Intergenic	.	.	.	.	.	.	.	.	.	.	.	.	.	.	.	.
TetK27	chr1	87326369	87328065	1696	87327241	247	319.85	42.4269	315.862	TetK27_peak_1162	Gigyf2	ENSMUST00000174846.7	+	87326998	87355723	TSS	0	-27658	0.037179	0.629346	---	ENSMUSG00000048000.15	Gigyf2	protein_coding	OTTMUSG00000037064.1	OTTMUST00000095336.1	2	---	---	Gigyf2-222	1	processed_transcript
TetK27	chr1	87333114	87333411	297	87333182	15	7.52498	4.32857	5.65872	TetK27_peak_1163	Gigyf2	ENSMUST00000164992.8	+	87327033	87425188	5' UTR Exon	6081	-91777	0.003036	1.000000	---	ENSMUSG00000048000.15	Gigyf2	protein_coding	OTTMUSG00000037064.1	OTTMUST00000095338.1	2	---	ENSMUSP00000129046.2	Gigyf2-202	1	protein_coding
TetK27	chr1	87333478	87333894	416	87333718	13	5.99569	3.7875	4.17465	TetK27_peak_1164	Gigyf2	ENSMUST00000164992.8	+	87327033	87425188	5' UTR Exon	6445	-91294	0.004248	1.000000	---	ENSMUSG00000048000.15	Gigyf2	protein_coding	OTTMUSG00000037064.1	OTTMUST00000095338.1	2	---	ENSMUSP00000129046.2	Gigyf2-202	1	protein_coding
TetK27	chr1	87334157	87335078	921	87334370	22	13.6241	6.22232	11.6331	TetK27_peak_1165	Gigyf2	ENSMUST00000174846.7	+	87326998	87355723	CDS Exon 2	7159	-20645	0.032096	1.000000	---	ENSMUSG00000048000.15	Gigyf2	protein_coding	OTTMUSG00000037064.1	OTTMUST00000095336.1	2	---	---	Gigyf2-222	1	processed_transcript
TetK27	chr1	87467035	87467644	609	87467265	18	10.0089	5.14017	8.08393	TetK27_peak_1166	.	.	.	.	.	Intergenic	.	.	.	.	.	.	.	.	.	.	.	.	.	.	.	.
TetK27	chr1	87606936	87608399	1463	87607966	58	55.8771	15.9616	53.4842	TetK27_peak_1167	.	.	.	.	.	Intergenic	.	.	.	.	.	.	.	.	.	.	.	.	.	.	.	.
TetK27	chr1	87608496	87608806	310	87608728	13	5.99569	3.7875	4.17465	TetK27_peak_1168	.	.	.	.	.	Intergenic	.	.	.	.	.	.	.	.	.	.	.	.	.	.	.	.
TetK27	chr1	87619604	87628743	9139	87620572	234	338.453	55.5525	334.301	TetK27_peak_1169	Inpp5d	ENSMUST00000163576.1	+	87621674	87667917	TSS	0	-39174	0.152885	0.773523	---	ENSMUSG00000026288.14	Inpp5d	protein_coding	OTTMUSG00000035865.1	OTTMUST00000091956.1	2	---	ENSMUSP00000130336.1	Inpp5d-205	3	protein_coding
TetK27	chr1	87636205	87638050	1845	87637462	43	36.6145	11.9036	34.3679	TetK27_peak_1170	Inpp5d	ENSMUST00000163576.1	+	87621674	87667917	5' UTR Exon	14531	-29867	0.039919	1.000000	---	ENSMUSG00000026288.14	Inpp5d	protein_coding	OTTMUSG00000035865.1	OTTMUST00000091956.1	2	---	ENSMUSP00000130336.1	Inpp5d-205	3	protein_coding
TetK27	chr1	87639596	87640769	1173	87640052	23	14.5757	6.49285	12.5699	TetK27_peak_1171	Inpp5d	ENSMUST00000163576.1	+	87621674	87667917	5' UTR Exon	17922	-27148	0.025387	1.000000	---	ENSMUSG00000026288.14	Inpp5d	protein_coding	OTTMUSG00000035865.1	OTTMUST00000091956.1	2	---	ENSMUSP00000130336.1	Inpp5d-205	3	protein_coding
TetK27	chr1	87646315	87646566	251	87646404	14	6.74667	4.05803	4.90229	TetK27_peak_1172	Inpp5d	ENSMUST00000163576.1	+	87621674	87667917	5' UTR Exon	24641	-21351	0.005449	1.000000	---	ENSMUSG00000026288.14	Inpp5d	protein_coding	OTTMUSG00000035865.1	OTTMUST00000091956.1	2	---	ENSMUSP00000130336.1	Inpp5d-205	3	protein_coding
TetK27	chr1	87649315	87649566	251	87649509	14	6.74667	4.05803	4.90229	TetK27_peak_1173	Inpp5d	ENSMUST00000163576.1	+	87621674	87667917	5' UTR Exon	27641	-18351	0.005449	1.000000	---	ENSMUSG00000026288.14	Inpp5d	protein_coding	OTTMUSG00000035865.1	OTTMUST00000091956.1	2	---	ENSMUSP00000130336.1	Inpp5d-205	3	protein_coding
TetK27	chr1	87650382	87651209	827	87650694	26	17.5331	7.30446	15.4838	TetK27_peak_1174	Inpp5d	ENSMUST00000163576.1	+	87621674	87667917	5' UTR Exon	28708	-16708	0.017905	1.000000	---	ENSMUSG00000026288.14	Inpp5d	protein_coding	OTTMUSG00000035865.1	OTTMUST00000091956.1	2	---	ENSMUSP00000130336.1	Inpp5d-205	3	protein_coding
TetK27	chr1	87661100	87661377	277	87661287	16	8.32904	4.5991	6.44257	TetK27_peak_1175	Inpp5d	ENSMUST00000163576.1	+	87621674	87667917	5' UTR Exon	39426	-6540	0.006012	1.000000	---	ENSMUSG00000026288.14	Inpp5d	protein_coding	OTTMUSG00000035865.1	OTTMUST00000091956.1	2	---	ENSMUSP00000130336.1	Inpp5d-205	3	protein_coding
TetK27	chr1	87666774	87667059	285	87666871	14	6.74667	4.05803	4.90229	TetK27_peak_1176	Inpp5d	ENSMUST00000165554.1	+	87620627	87667993	TTS	46147	-934	0.006038	1.000000	---	ENSMUSG00000026288.14	Inpp5d	protein_coding	OTTMUSG00000035865.1	OTTMUST00000091955.1	2	---	ENSMUSP00000128700.1	Inpp5d-207	5	protein_coding
TetK27	chr1	87755301	87757086	1785	87756213	273	341.469	39.5834	337.285	TetK27_peak_1177	Atg16l1	ENSMUST00000113186.7	+	87756076	87792423	TSS	0	-35337	0.027814	0.566069	CCDS56638.1	ENSMUSG00000026289.15	Atg16l1	protein_coding	OTTMUSG00000016467.1	OTTMUST00000042059.1	2	---	ENSMUSP00000108811.1	Atg16l1-202	1	protein_coding
TetK27	chr1	87811133	87811889	756	87811688	22	13.6241	6.22232	11.6331	TetK27_peak_1178	Sag	ENSMUST00000144334.7	+	87812164	87824460	TSS	-275	-12571	0.000000	0.000000	---	ENSMUSG00000056055.13	Sag	protein_coding	OTTMUSG00000021826.1	OTTMUST00000051800.1	2	---	---	Sag-205	5	processed_transcript
TetK27	chr1	87826993	87827445	452	87827199	16	8.32904	4.5991	6.44257	TetK27_peak_1179	Sag	ENSMUST00000145385.1	+	87826488	87835415	CDS Exon 1	505	-7970	0.050739	1.000000	---	ENSMUSG00000056055.13	Sag	protein_coding	OTTMUSG00000021826.1	OTTMUST00000051797.1	2	---	---	Sag-206	1	retained_intron
TetK27	chr1	87827747	87828846	1099	87828463	108	130.365	29.4884	127.541	TetK27_peak_1180	Sag	ENSMUST00000145385.1	+	87826488	87835415	CDS Exon 1	1259	-6569	0.123208	1.000000	---	ENSMUSG00000056055.13	Sag	protein_coding	OTTMUSG00000021826.1	OTTMUST00000051797.1	2	---	---	Sag-206	1	retained_intron
TetK27	chr1	87829041	87829836	795	87829498	45	38.1091	11.9862	35.8504	TetK27_peak_1181	Sag	ENSMUST00000145385.1	+	87826488	87835415	Intron 1	2553	-5579	0.089158	1.000000	---	ENSMUSG00000056055.13	Sag	protein_coding	OTTMUSG00000021826.1	OTTMUST00000051797.1	2	---	---	Sag-206	1	retained_intron
TetK27	chr1	87829911	87830477	566	87830130	27	16.5774	6.61902	14.5417	TetK27_peak_1182	Sag	ENSMUST00000145385.1	+	87826488	87835415	Intron 1	3423	-4938	0.063508	1.000000	---	ENSMUSG00000056055.13	Sag	protein_coding	OTTMUSG00000021826.1	OTTMUST00000051797.1	2	---	---	Sag-206	1	retained_intron
TetK27	chr1	87846176	87848410	2234	87846893	55	51.8782	15.15	49.5127	TetK27_peak_1183	.	.	.	.	.	Intergenic	.	.	.	.	.	.	.	.	.	.	.	.	.	.	.	.
TetK27	chr1	87852491	87854587	2096	87853534	209	205.355	21.8432	202.138	TetK27_peak_1184	Gm19582	ENSMUST00000187511.1	-	87853347	87854300	TSS	0	0	1.000000	0.454936	---	ENSMUSG00000101942.1	Gm19582	antisense_RNA	OTTMUSG00000048196.1	OTTMUST00000123746.1	2	---	---	Gm19582-201	2	antisense_RNA
TetK27	chr1	87866136	87867471	1335	87866888	24	12.3552	5.24262	10.3919	TetK27_peak_1185	Dgkd	ENSMUST00000027517.13	+	87853287	87944491	Intron 1	12849	-77020	0.014648	1.000000	CCDS48312.1	ENSMUSG00000070738.10	Dgkd	protein_coding	OTTMUSG00000048195.1	OTTMUST00000123739.1	2	---	ENSMUSP00000027517.7	Dgkd-201	5	protein_coding
TetK27	chr1	87867573	87867834	261	87867655	14	4.99608	3.14557	3.22361	TetK27_peak_1186	Dgkd	ENSMUST00000027517.13	+	87853287	87944491	Intron 1	14286	-76657	0.002873	1.000000	CCDS48312.1	ENSMUSG00000070738.10	Dgkd	protein_coding	OTTMUSG00000048195.1	OTTMUST00000123739.1	2	---	ENSMUSP00000027517.7	Dgkd-201	5	protein_coding
TetK27	chr1	87875067	87876923	1856	87876154	28	19.5842	7.84553	17.5081	TetK27_peak_1187	Dgkd	ENSMUST00000027517.13	+	87853287	87944491	Intron 1	21780	-67568	0.020361	1.000000	CCDS48312.1	ENSMUSG00000070738.10	Dgkd	protein_coding	OTTMUSG00000048195.1	OTTMUST00000123739.1	2	---	ENSMUSP00000027517.7	Dgkd-201	5	protein_coding
TetK27	chr1	87877587	87877888	301	87877812	14	6.74667	4.05803	4.90229	TetK27_peak_1188	Dgkd	ENSMUST00000027517.13	+	87853287	87944491	Intron 1	24300	-66603	0.003311	1.000000	CCDS48312.1	ENSMUSG00000070738.10	Dgkd	protein_coding	OTTMUSG00000048195.1	OTTMUST00000123739.1	2	---	ENSMUSP00000027517.7	Dgkd-201	5	protein_coding
TetK27	chr1	87899441	87900403	962	87899878	25	16.5309	7.03392	14.4964	TetK27_peak_1189	Gm38365	ENSMUST00000195720.1	+	87897540	87900533	TTS	1901	-130	0.321643	1.000000	---	ENSMUSG00000103591.1	Gm38365	TEC	OTTMUSG00000048198.1	OTTMUST00000123748.1	2	---	---	Gm38365-201		TEC
TetK27	chr1	87900916	87901420	504	87901054	17	9.15743	4.86964	7.25158	TetK27_peak_1190	Dgkd	ENSMUST00000190243.1	+	87880435	87915745	Intron 2	20481	-14325	0.014301	1.000000	---	ENSMUSG00000070738.10	Dgkd	protein_coding	OTTMUSG00000048195.1	OTTMUST00000123740.1	2	---	---	Dgkd-206	2	retained_intron
TetK27	chr1	87935565	87935863	298	87935769	15	7.51141	4.32125	5.65872	TetK27_peak_1191	Dgkd	ENSMUST00000189726.1	+	87935283	87940266	Intron 1	282	-4403	0.059992	1.000000	---	ENSMUSG00000070738.10	Dgkd	protein_coding	OTTMUSG00000048195.1	OTTMUST00000123744.1	2	---	---	Dgkd-204	3	retained_intron
TetK27	chr1	87936084	87936335	251	87936176	12	5.04139	3.38739	3.26831	TetK27_peak_1192	Dgkd	ENSMUST00000189726.1	+	87935283	87940266	CDS Exon 2	801	-3931	0.050562	1.000000	---	ENSMUSG00000070738.10	Dgkd	protein_coding	OTTMUSG00000048195.1	OTTMUST00000123744.1	2	---	---	Dgkd-204	3	retained_intron
TetK27	chr1	87944054	87944305	251	87944228	12	5.2632	3.51102	3.47795	TetK27_peak_1193	Dgkd	ENSMUST00000189448.1	+	87938385	87945179	TTS	5669	-874	0.037086	1.000000	---	ENSMUSG00000070738.10	Dgkd	protein_coding	OTTMUSG00000048195.1	OTTMUST00000123745.1	2	---	ENSMUSP00000139626.1	Dgkd-203	3	protein_coding
TetK27	chr1	88007891	88008727	836	88008324	138	134.162	20.0806	131.32	TetK27_peak_1194	Usp40	ENSMUST00000188332.6	-	87946443	88008535	TSS	0	-61448	0.010388	0.770609	---	ENSMUSG00000005501.14	Usp40	protein_coding	OTTMUSG00000048199.1	OTTMUST00000123752.1	2	---	ENSMUSP00000140574.1	Usp40-206	1	nonsense_mediated_decay
TetK27	chr1	88260284	88260755	471	88260316	22	4.45565	2.39235	2.71186	TetK27_peak_1195	Mroh2a	ENSMUST00000061013.12	+	88227020	88262290	3' UTR Exon	33264	-1535	0.013382	1.000000	---	ENSMUSG00000079429.9	Mroh2a	protein_coding	OTTMUSG00000020804.1	---	3	---	ENSMUSP00000130508.1	Mroh2a-201	5	protein_coding
TetK27	chr1	88264132	88264425	293	88264312	20	6.39291	3.21746	4.5691	TetK27_peak_1196	Hjurp	ENSMUST00000054674.14	-	88262471	88277634	3' UTR Exon	13209	-1661	0.019388	1.000000	CCDS15144.1	ENSMUSG00000044783.16	Hjurp	protein_coding	OTTMUSG00000020807.1	OTTMUST00000049209.1	2	---	ENSMUSP00000054263.8	Hjurp-201	1	protein_coding
TetK27	chr1	88276436	88278167	1731	88277363	218	185.043	16.3646	181.937	TetK27_peak_1197	Hjurp	ENSMUST00000126739.1	-	88274712	88277580	TSS	0	-1724	0.399094	0.661085	---	ENSMUSG00000044783.16	Hjurp	protein_coding	OTTMUSG00000020807.1	OTTMUST00000049213.1	2	---	---	Hjurp-203	1	retained_intron
TetK27	chr1	88450369	88451489	1120	88450745	38	30.6499	10.5509	28.4563	TetK27_peak_1198	Gm29538	ENSMUST00000190783.1	-	88443969	88462609	Intron 1	11120	-6400	0.060136	1.000000	---	ENSMUSG00000099553.1	Gm29538	lincRNA	OTTMUSG00000048257.1	OTTMUST00000123865.1	2	---	---	Gm29538-201	2	lincRNA
TetK27	chr1	88474205	88474844	639	88474595	26	17.5331	7.30446	15.4838	TetK27_peak_1199	.	.	.	.	.	Intergenic	.	.	.	.	.	.	.	.	.	.	.	.	.	.	.	.
TetK27	chr1	88475013	88476162	1149	88475456	29	20.6319	8.11607	18.5431	TetK27_peak_1200	.	.	.	.	.	Intergenic	.	.	.	.	.	.	.	.	.	.	.	.	.	.	.	.
TetK27	chr1	88575199	88579422	4223	88576184	132	167.15	34.6556	164.134	TetK27_peak_1201	.	.	.	.	.	Intergenic	.	.	.	.	.	.	.	.	.	.	.	.	.	.	.	.
TetK27	chr1	88584894	88585472	578	88585092	13	5.99569	3.7875	4.17465	TetK27_peak_1202	.	.	.	.	.	Intergenic	.	.	.	.	.	.	.	.	.	.	.	.	.	.	.	.
TetK27	chr1	88585681	88589388	3707	88588122	116	143.359	31.6527	140.468	TetK27_peak_1203	.	.	.	.	.	Intergenic	.	.	.	.	.	.	.	.	.	.	.	.	.	.	.	.
TetK27	chr1	88590330	88593272	2942	88591485	65	65.4576	17.8553	63.001	TetK27_peak_1204	.	.	.	.	.	Intergenic	.	.	.	.	.	.	.	.	.	.	.	.	.	.	.	.
TetK27	chr1	88611089	88611483	394	88611364	16	8.32904	4.5991	6.44257	TetK27_peak_1205	.	.	.	.	.	Intergenic	.	.	.	.	.	.	.	.	.	.	.	.	.	.	.	.
TetK27	chr1	88621871	88622658	787	88622445	23	14.5757	6.49285	12.5699	TetK27_peak_1206	.	.	.	.	.	Intergenic	.	.	.	.	.	.	.	.	.	.	.	.	.	.	.	.
TetK27	chr1	88636429	88636977	548	88636581	31	20.483	7.56459	18.4032	TetK27_peak_1207	.	.	.	.	.	Intergenic	.	.	.	.	.	.	.	.	.	.	.	.	.	.	.	.
TetK27	chr1	88637644	88638094	450	88637893	17	6.15184	3.39176	4.3298	TetK27_peak_1208	.	.	.	.	.	Intergenic	.	.	.	.	.	.	.	.	.	.	.	.	.	.	.	.
TetK27	chr1	88639863	88640160	297	88639991	15	7.52498	4.32857	5.65872	TetK27_peak_1209	.	.	.	.	.	Intergenic	.	.	.	.	.	.	.	.	.	.	.	.	.	.	.	.
TetK27	chr1	88641593	88641856	263	88641704	14	6.74667	4.05803	4.90229	TetK27_peak_1210	.	.	.	.	.	Intergenic	.	.	.	.	.	.	.	.	.	.	.	.	.	.	.	.
TetK27	chr1	88653366	88653617	251	88653572	11	4.58302	3.24643	2.81413	TetK27_peak_1211	Gm38130	ENSMUST00000194311.1	+	88653085	88654846	CDS Exon 1	281	-1229	0.143019	1.000000	---	ENSMUSG00000104057.1	Gm38130	TEC	OTTMUSG00000048261.1	OTTMUST00000123869.1	2	---	---	Gm38130-201		TEC
TetK27	chr1	88654183	88656494	2311	88655396	66	66.8531	18.1259	64.3879	TetK27_peak_1212	Gm29336	ENSMUST00000186042.1	+	88656308	88658101	TSS	0	-1607	0.104236	0.080882	---	ENSMUSG00000100367.1	Gm29336	lincRNA	OTTMUSG00000048262.1	OTTMUST00000123870.1	2	---	---	Gm29336-201	2	lincRNA
TetK27	chr1	88656861	88657262	401	88656979	12	5.2738	3.51696	3.47795	TetK27_peak_1213	Gm29336	ENSMUST00000186042.1	+	88656308	88658101	TTS	553	-839	0.224080	1.000000	---	ENSMUSG00000100367.1	Gm29336	lincRNA	OTTMUSG00000048262.1	OTTMUST00000123870.1	2	---	---	Gm29336-201	2	lincRNA
TetK27	chr1	88657384	88657639	255	88657521	12	5.2738	3.51696	3.47795	TetK27_peak_1214	Gm29336	ENSMUST00000186042.1	+	88656308	88658101	TTS	1076	-462	0.142698	1.000000	---	ENSMUSG00000100367.1	Gm29336	lincRNA	OTTMUSG00000048262.1	OTTMUST00000123870.1	2	---	---	Gm29336-201	2	lincRNA
TetK27	chr1	88698149	88702885	4736	88701847	238	246.441	24.8597	242.983	TetK27_peak_1215	Arl4c	ENSMUST00000159814.1	-	88698225	88702222	TSS	0	0	1.000000	0.843994	CCDS15146.1	ENSMUSG00000049866.12	Arl4c	protein_coding	OTTMUSG00000028785.1	OTTMUST00000072344.1	2	---	ENSMUSP00000124344.1	Arl4c-202		protein_coding
TetK27	chr1	88706274	88706534	260	88706451	14	5.78446	3.5459	3.98249	TetK27_peak_1216	.	.	.	.	.	Intergenic	.	.	.	.	.	.	.	.	.	.	.	.	.	.	.	.
TetK27	chr1	88707656	88710052	2396	88708935	54	50.5604	14.8795	48.2044	TetK27_peak_1217	.	.	.	.	.	Intergenic	.	.	.	.	.	.	.	.	.	.	.	.	.	.	.	.
TetK27	chr1	88720521	88721128	607	88720770	16	8.32904	4.5991	6.44257	TetK27_peak_1218	.	.	.	.	.	Intergenic	.	.	.	.	.	.	.	.	.	.	.	.	.	.	.	.
TetK27	chr1	89015637	89015888	251	89015811	12	5.2738	3.51696	3.47795	TetK27_peak_1219	1700067G17Rik	ENSMUST00000186180.1	+	89016113	89022211	TSS	-225	-6323	0.000000	0.000000	---	ENSMUSG00000099378.1	1700067G17Rik	lincRNA	OTTMUSG00000045302.1	OTTMUST00000118966.1	2	---	---	1700067G17Rik-201	1	lincRNA
TetK27	chr1	89069459	89071426	1967	89070581	67	55.1132	12.8133	52.7275	TetK27_peak_1220	Sh3bp4	ENSMUST00000123745.1	+	89070453	89112861	TSS	0	-41435	0.022967	0.494919	---	ENSMUSG00000036206.12	Sh3bp4	protein_coding	OTTMUSG00000029359.1	OTTMUST00000072747.1	2	---	---	Sh3bp4-202	2	processed_transcript
TetK27	chr1	89078327	89078614	287	89078512	14	6.74667	4.05803	4.90229	TetK27_peak_1221	Sh3bp4	ENSMUST00000066279.10	+	89070415	89155069	5' UTR Exon	7912	-76455	0.003402	1.000000	CCDS15147.1	ENSMUSG00000036206.12	Sh3bp4	protein_coding	OTTMUSG00000029359.1	OTTMUST00000072746.1	2	---	ENSMUSP00000067581.4	Sh3bp4-201	1	protein_coding
TetK27	chr1	89079001	89079305	304	89079143	21	12.6712	5.94172	10.7067	TetK27_peak_1222	Sh3bp4	ENSMUST00000066279.10	+	89070415	89155069	5' UTR Exon	8586	-75764	0.003603	1.000000	CCDS15147.1	ENSMUSG00000036206.12	Sh3bp4	protein_coding	OTTMUSG00000029359.1	OTTMUST00000072746.1	2	---	ENSMUSP00000067581.4	Sh3bp4-201	1	protein_coding
TetK27	chr1	89092485	89093686	1201	89092781	26	17.5331	7.30446	15.4838	TetK27_peak_1223	Sh3bp4	ENSMUST00000066279.10	+	89070415	89155069	5' UTR Exon	22070	-61383	0.014199	1.000000	CCDS15147.1	ENSMUSG00000036206.12	Sh3bp4	protein_coding	OTTMUSG00000029359.1	OTTMUST00000072746.1	2	---	ENSMUSP00000067581.4	Sh3bp4-201	1	protein_coding
TetK27	chr1	89108609	89108954	345	89108726	12	5.2738	3.51696	3.47795	TetK27_peak_1224	Sh3bp4	ENSMUST00000066279.10	+	89070415	89155069	5' UTR Exon	38194	-46115	0.004087	1.000000	CCDS15147.1	ENSMUSG00000036206.12	Sh3bp4	protein_coding	OTTMUSG00000029359.1	OTTMUST00000072746.1	2	---	ENSMUSP00000067581.4	Sh3bp4-201	1	protein_coding
TetK27	chr1	89183219	89184019	800	89183436	26	17.5331	7.30446	15.4838	TetK27_peak_1225	.	.	.	.	.	Intergenic	.	.	.	.	.	.	.	.	.	.	.	.	.	.	.	.
TetK27	chr1	89193694	89195159	1465	89194814	51	46.6545	14.0678	44.327	TetK27_peak_1226	.	.	.	.	.	Intergenic	.	.	.	.	.	.	.	.	.	.	.	.	.	.	.	.
TetK27	chr1	89195475	89195957	482	89195698	18	8.73676	4.49148	6.84645	TetK27_peak_1227	.	.	.	.	.	Intergenic	.	.	.	.	.	.	.	.	.	.	.	.	.	.	.	.
TetK27	chr1	90602675	90604438	1763	90603659	176	247.461	47.8848	243.997	TetK27_peak_1228	Cops8	ENSMUST00000191510.6	+	90603476	90613125	TSS	0	-8687	0.099793	0.545918	---	ENSMUSG00000034432.11	Cops8	protein_coding	OTTMUSG00000048401.1	OTTMUST00000124088.1	2	---	---	Cops8-209	1	retained_intron
TetK27	chr1	90676792	90677220	428	90677157	14	6.74667	4.05803	4.90229	TetK27_peak_1229	Gm9991	ENSMUST00000070048.3	+	90675161	90679794	Intron 1	1631	-2574	0.092577	1.000000	---	ENSMUSG00000056128.3	Gm9991	lincRNA	OTTMUSG00000048402.1	OTTMUST00000124096.1	2	---	---	Gm9991-201	1	lincRNA
TetK27	chr1	90740328	90740608	280	90740498	11	4.58302	3.24643	2.81413	TetK27_peak_1230	.	.	.	.	.	Intergenic	.	.	.	.	.	.	.	.	.	.	.	.	.	.	.	.
TetK27	chr1	90998687	90998968	281	90998751	26	5.8818	2.65949	4.07962	TetK27_peak_1231	Lrrfip1	ENSMUST00000185531.6	+	90998777	91122540	TSS	0	-123572	0.001551	0.680851	---	ENSMUSG00000026305.15	Lrrfip1	protein_coding	OTTMUSG00000048410.1	OTTMUST00000124108.1	2	---	ENSMUSP00000139497.1	Lrrfip1-205	5	protein_coding
TetK27	chr1	91052126	91071193	19067	91057495	211	303.646	53.3616	299.788	TetK27_peak_1232	Lrrfip1	ENSMUST00000097650.9	+	91053507	91128919	TSS	0	-57726	0.234535	0.927575	CCDS35662.1	ENSMUSG00000026305.15	Lrrfip1	protein_coding	OTTMUSG00000048410.1	OTTMUST00000124111.1	2	---	ENSMUSP00000095255.3	Lrrfip1-204	1	protein_coding
TetK27	chr1	91074058	91074335	277	91074217	17	9.15743	4.86964	7.25158	TetK27_peak_1233	Lrrfip1	ENSMUST00000097650.9	+	91053507	91128919	Intron 3	20551	-54584	0.003686	1.000000	CCDS35662.1	ENSMUSG00000026305.15	Lrrfip1	protein_coding	OTTMUSG00000048410.1	OTTMUST00000124111.1	2	---	ENSMUSP00000095255.3	Lrrfip1-204	1	protein_coding
TetK27	chr1	91074458	91075100	642	91074876	22	13.6241	6.22232	11.6331	TetK27_peak_1234	Lrrfip1	ENSMUST00000097650.9	+	91053507	91128919	Intron 3	20951	-53819	0.008526	1.000000	CCDS35662.1	ENSMUSG00000026305.15	Lrrfip1	protein_coding	OTTMUSG00000048410.1	OTTMUST00000124111.1	2	---	ENSMUSP00000095255.3	Lrrfip1-204	1	protein_coding
TetK27	chr1	91075172	91075674	502	91075265	15	7.52498	4.32857	5.65872	TetK27_peak_1235	Lrrfip1	ENSMUST00000097650.9	+	91053507	91128919	Intron 3	21665	-53245	0.006670	1.000000	CCDS35662.1	ENSMUSG00000026305.15	Lrrfip1	protein_coding	OTTMUSG00000048410.1	OTTMUST00000124111.1	2	---	ENSMUSP00000095255.3	Lrrfip1-204	1	protein_coding
TetK27	chr1	91075863	91076783	920	91076331	19	10.8823	5.41071	8.93972	TetK27_peak_1236	Lrrfip1	ENSMUST00000097650.9	+	91053507	91128919	Intron 3	22356	-52136	0.012213	1.000000	CCDS35662.1	ENSMUSG00000026305.15	Lrrfip1	protein_coding	OTTMUSG00000048410.1	OTTMUST00000124111.1	2	---	ENSMUSP00000095255.3	Lrrfip1-204	1	protein_coding
TetK27	chr1	91077113	91077780	667	91077647	19	10.8823	5.41071	8.93972	TetK27_peak_1237	Lrrfip1	ENSMUST00000097650.9	+	91053507	91128919	Intron 4	23606	-51139	0.008858	1.000000	CCDS35662.1	ENSMUSG00000026305.15	Lrrfip1	protein_coding	OTTMUSG00000048410.1	OTTMUST00000124111.1	2	---	ENSMUSP00000095255.3	Lrrfip1-204	1	protein_coding
TetK27	chr1	91078888	91079139	251	91079129	11	4.58302	3.24643	2.81413	TetK27_peak_1238	Lrrfip1	ENSMUST00000097650.9	+	91053507	91128919	CDS Exon 6	25381	-49780	0.003342	1.000000	CCDS35662.1	ENSMUSG00000026305.15	Lrrfip1	protein_coding	OTTMUSG00000048410.1	OTTMUST00000124111.1	2	---	ENSMUSP00000095255.3	Lrrfip1-204	1	protein_coding
TetK27	chr1	91079248	91079731	483	91079508	16	8.32904	4.5991	6.44257	TetK27_peak_1239	Lrrfip1	ENSMUST00000097650.9	+	91053507	91128919	Intron 6	25741	-49188	0.006418	1.000000	CCDS35662.1	ENSMUSG00000026305.15	Lrrfip1	protein_coding	OTTMUSG00000048410.1	OTTMUST00000124111.1	2	---	ENSMUSP00000095255.3	Lrrfip1-204	1	protein_coding
TetK27	chr1	91079818	91080854	1036	91080362	25	16.5309	7.03392	14.4964	TetK27_peak_1240	Lrrfip1	ENSMUST00000097650.9	+	91053507	91128919	Intron 6	26311	-48065	0.013751	1.000000	CCDS35662.1	ENSMUSG00000026305.15	Lrrfip1	protein_coding	OTTMUSG00000048410.1	OTTMUST00000124111.1	2	---	ENSMUSP00000095255.3	Lrrfip1-204	1	protein_coding
TetK27	chr1	91081080	91081538	458	91081204	17	7.42133	3.98811	5.57146	TetK27_peak_1241	Lrrfip1	ENSMUST00000097650.9	+	91053507	91128919	Intron 6	27573	-47381	0.006086	1.000000	CCDS35662.1	ENSMUSG00000026305.15	Lrrfip1	protein_coding	OTTMUSG00000048410.1	OTTMUST00000124111.1	2	---	ENSMUSP00000095255.3	Lrrfip1-204	1	protein_coding
TetK27	chr1	91082102	91082576	474	91082301	14	6.74667	4.05803	4.90229	TetK27_peak_1242	Lrrfip1	ENSMUST00000189617.2	+	91053586	91128288	CDS Exon 7	28516	-45712	0.006359	1.000000	CCDS78647.1	ENSMUSG00000026305.15	Lrrfip1	protein_coding	OTTMUSG00000048410.1	OTTMUST00000124112.1	2	---	ENSMUSP00000139811.1	Lrrfip1-212	1	protein_coding
TetK27	chr1	91082846	91083097	251	91082968	13	5.99569	3.7875	4.17465	TetK27_peak_1243	Lrrfip1	ENSMUST00000097650.9	+	91053507	91128919	Intron 6	29339	-45822	0.003342	1.000000	CCDS35662.1	ENSMUSG00000026305.15	Lrrfip1	protein_coding	OTTMUSG00000048410.1	OTTMUST00000124111.1	2	---	ENSMUSP00000095255.3	Lrrfip1-204	1	protein_coding
TetK27	chr1	91083448	91083735	287	91083512	11	4.58302	3.24643	2.81413	TetK27_peak_1244	Lrrfip1	ENSMUST00000097650.9	+	91053507	91128919	Intron 6	29941	-45184	0.003819	1.000000	CCDS35662.1	ENSMUSG00000026305.15	Lrrfip1	protein_coding	OTTMUSG00000048410.1	OTTMUST00000124111.1	2	---	ENSMUSP00000095255.3	Lrrfip1-204	1	protein_coding
TetK27	chr1	91084471	91085002	531	91084658	17	9.15743	4.86964	7.25158	TetK27_peak_1245	Lrrfip1	ENSMUST00000097650.9	+	91053507	91128919	CDS Exon 7	30964	-43917	0.007054	1.000000	CCDS35662.1	ENSMUSG00000026305.15	Lrrfip1	protein_coding	OTTMUSG00000048410.1	OTTMUST00000124111.1	2	---	ENSMUSP00000095255.3	Lrrfip1-204	1	protein_coding
TetK27	chr1	91085313	91095293	9980	91092338	75	79.6917	20.5607	77.1464	TetK27_peak_1246	Lrrfip1	ENSMUST00000097650.9	+	91053507	91128919	CDS Exon 8	31806	-33626	0.132351	1.000000	CCDS35662.1	ENSMUSG00000026305.15	Lrrfip1	protein_coding	OTTMUSG00000048410.1	OTTMUST00000124111.1	2	---	ENSMUSP00000095255.3	Lrrfip1-204	1	protein_coding
TetK27	chr1	91095351	91099124	3773	91095998	105	125.557	28.6768	122.759	TetK27_peak_1247	Lrrfip1	ENSMUST00000097650.9	+	91053507	91128919	Intron 10	41844	-29795	0.050044	1.000000	CCDS35662.1	ENSMUSG00000026305.15	Lrrfip1	protein_coding	OTTMUSG00000048410.1	OTTMUST00000124111.1	2	---	ENSMUSP00000095255.3	Lrrfip1-204	1	protein_coding
TetK27	chr1	91099457	91100016	559	91099644	12	5.2738	3.51696	3.47795	TetK27_peak_1248	Lrrfip1	ENSMUST00000186762.6	+	91053507	91100582	TTS	45950	-566	0.011896	1.000000	---	ENSMUSG00000026305.15	Lrrfip1	protein_coding	OTTMUSG00000048410.1	OTTMUST00000124261.1	2	---	ENSMUSP00000139902.1	Lrrfip1-206	5	protein_coding
TetK27	chr1	91104690	91104941	251	91104891	12	3.80797	2.72616	2.09813	TetK27_peak_1249	Lrrfip1	ENSMUST00000097650.9	+	91053507	91128919	Intron 13	51183	-23978	0.003342	1.000000	CCDS35662.1	ENSMUSG00000026305.15	Lrrfip1	protein_coding	OTTMUSG00000048410.1	OTTMUST00000124111.1	2	---	ENSMUSP00000095255.3	Lrrfip1-204	1	protein_coding
TetK27	chr1	91108615	91109075	460	91108826	12	5.2738	3.51696	3.47795	TetK27_peak_1250	Lrrfip1	ENSMUST00000189505.6	+	90998737	91108641	TTS	109878	0	0.000246	0.058568	---	ENSMUSG00000026305.15	Lrrfip1	protein_coding	OTTMUSG00000048410.1	OTTMUST00000124107.1	2	---	ENSMUSP00000141024.1	Lrrfip1-211	1	protein_coding
TetK27	chr1	91115476	91115838	362	91115674	13	5.99569	3.7875	4.17465	TetK27_peak_1251	Lrrfip1	ENSMUST00000188094.6	+	91111214	91116922	CDS Exon 4	4262	-1084	0.063584	1.000000	---	ENSMUSG00000026305.15	Lrrfip1	protein_coding	OTTMUSG00000048410.1	OTTMUST00000124113.1	2	---	---	Lrrfip1-209	1	processed_transcript
TetK27	chr1	91179205	91183201	3996	91180091	122	112.621	17.7692	109.894	TetK27_peak_1252	Ramp1	ENSMUST00000165855.7	+	91179822	91206791	TSS	0	-23590	0.125324	0.845634	CCDS78648.1	ENSMUSG00000034353.14	Ramp1	protein_coding	OTTMUSG00000048487.1	OTTMUST00000124270.1	2	---	ENSMUSP00000128679.2	Ramp1-202	2	protein_coding
TetK27	chr1	91183253	91183560	307	91183336	15	7.52498	4.32857	5.65872	TetK27_peak_1253	Ramp1	ENSMUST00000165855.7	+	91179822	91206791	Intron 1	3431	-23231	0.011420	1.000000	CCDS78648.1	ENSMUSG00000034353.14	Ramp1	protein_coding	OTTMUSG00000048487.1	OTTMUST00000124270.1	2	---	ENSMUSP00000128679.2	Ramp1-202	2	protein_coding
TetK27	chr1	91183688	91184225	537	91183734	12	5.2738	3.51696	3.47795	TetK27_peak_1254	Ramp1	ENSMUST00000165855.7	+	91179822	91206791	Intron 1	3866	-22566	0.019948	1.000000	CCDS78648.1	ENSMUSG00000034353.14	Ramp1	protein_coding	OTTMUSG00000048487.1	OTTMUST00000124270.1	2	---	ENSMUSP00000128679.2	Ramp1-202	2	protein_coding
TetK27	chr1	91185647	91185907	260	91185864	14	6.74667	4.05803	4.90229	TetK27_peak_1255	Ramp1	ENSMUST00000165855.7	+	91179822	91206791	Intron 1	5825	-20884	0.009677	1.000000	CCDS78648.1	ENSMUSG00000034353.14	Ramp1	protein_coding	OTTMUSG00000048487.1	OTTMUST00000124270.1	2	---	ENSMUSP00000128679.2	Ramp1-202	2	protein_coding
TetK27	chr1	91186049	91188910	2861	91187611	37	29.4889	10.2804	27.3063	TetK27_peak_1256	Ramp1	ENSMUST00000165855.7	+	91179822	91206791	Intron 1	6227	-17881	0.106118	1.000000	CCDS78648.1	ENSMUSG00000034353.14	Ramp1	protein_coding	OTTMUSG00000048487.1	OTTMUST00000124270.1	2	---	ENSMUSP00000128679.2	Ramp1-202	2	protein_coding
TetK27	chr1	91189130	91197145	8015	91192694	102	120.785	27.8652	118.012	TetK27_peak_1257	Ramp1	ENSMUST00000165855.7	+	91179822	91206791	CDS Exon 2	9308	-9646	0.297219	1.000000	CCDS78648.1	ENSMUSG00000034353.14	Ramp1	protein_coding	OTTMUSG00000048487.1	OTTMUST00000124270.1	2	---	ENSMUSP00000128679.2	Ramp1-202	2	protein_coding
TetK27	chr1	91197248	91197550	302	91197489	13	5.11059	3.30951	3.33512	TetK27_peak_1258	Ramp1	ENSMUST00000165855.7	+	91179822	91206791	Intron 2	17426	-9241	0.011235	1.000000	CCDS78648.1	ENSMUSG00000034353.14	Ramp1	protein_coding	OTTMUSG00000048487.1	OTTMUST00000124270.1	2	---	ENSMUSP00000128679.2	Ramp1-202	2	protein_coding
TetK27	chr1	91201804	91203215	1411	91202250	43	36.6145	11.9036	34.3679	TetK27_peak_1259	Ramp1	ENSMUST00000165855.7	+	91179822	91206791	Intron 2	21982	-3576	0.052354	1.000000	CCDS78648.1	ENSMUSG00000034353.14	Ramp1	protein_coding	OTTMUSG00000048487.1	OTTMUST00000124270.1	2	---	ENSMUSP00000128679.2	Ramp1-202	2	protein_coding
TetK27	chr1	91218063	91218353	290	91218157	15	7.52498	4.32857	5.65872	TetK27_peak_1260	Ramp1	ENSMUST00000097648.5	+	91180046	91225197	Intron 2	38017	-6844	0.006445	1.000000	CCDS15158.1	ENSMUSG00000034353.14	Ramp1	protein_coding	OTTMUSG00000048487.1	OTTMUST00000124272.1	2	---	ENSMUSP00000095253.4	Ramp1-201	1	protein_coding
TetK27	chr1	91219123	91219599	476	91219364	16	8.32904	4.5991	6.44257	TetK27_peak_1261	Ramp1	ENSMUST00000097648.5	+	91180046	91225197	Intron 2	39077	-5598	0.010564	1.000000	CCDS15158.1	ENSMUSG00000034353.14	Ramp1	protein_coding	OTTMUSG00000048487.1	OTTMUST00000124272.1	2	---	ENSMUSP00000095253.4	Ramp1-201	1	protein_coding
TetK27	chr1	91220169	91220836	667	91220636	17	6.97702	3.77469	5.13045	TetK27_peak_1262	Ramp1	ENSMUST00000097648.5	+	91180046	91225197	Intron 2	40123	-4361	0.014794	1.000000	CCDS15158.1	ENSMUSG00000034353.14	Ramp1	protein_coding	OTTMUSG00000048487.1	OTTMUST00000124272.1	2	---	ENSMUSP00000095253.4	Ramp1-201	1	protein_coding
TetK27	chr1	91249559	91251321	1762	91250498	267	296.334	29.5298	292.531	TetK27_peak_1263	Ube2f	ENSMUST00000059743.11	+	91250311	91285741	TSS	0	-34420	0.028534	0.573454	CCDS48322.1	ENSMUSG00000034343.14	Ube2f	protein_coding	OTTMUSG00000048490.1	OTTMUST00000124276.1	2	---	ENSMUSP00000054303.5	Ube2f-201	1	protein_coding
TetK27	chr1	91259485	91260045	560	91259796	31	22.7693	8.65714	20.656	TetK27_peak_1264	Ube2f	ENSMUST00000059743.11	+	91250311	91285741	Intron 3	9174	-25696	0.015834	1.000000	CCDS48322.1	ENSMUSG00000034343.14	Ube2f	protein_coding	OTTMUSG00000048490.1	OTTMUST00000124276.1	2	---	ENSMUSP00000054303.5	Ube2f-201	1	protein_coding
TetK27	chr1	91260571	91260839	268	91260765	13	5.99569	3.7875	4.17465	TetK27_peak_1265	Ube2f	ENSMUST00000059743.11	+	91250311	91285741	Intron 3	10260	-24902	0.007592	1.000000	CCDS48322.1	ENSMUSG00000034343.14	Ube2f	protein_coding	OTTMUSG00000048490.1	OTTMUST00000124276.1	2	---	ENSMUSP00000054303.5	Ube2f-201	1	protein_coding
TetK27	chr1	91278127	91278456	329	91278264	13	5.99569	3.7875	4.17465	TetK27_peak_1266	Ube2f	ENSMUST00000059743.11	+	91250311	91285741	CDS Exon 8	27816	-7285	0.009314	1.000000	CCDS48322.1	ENSMUSG00000034343.14	Ube2f	protein_coding	OTTMUSG00000048490.1	OTTMUST00000124276.1	2	---	ENSMUSP00000054303.5	Ube2f-201	1	protein_coding
TetK27	chr1	91278649	91279197	548	91278998	16	8.32904	4.5991	6.44257	TetK27_peak_1267	Ube2f	ENSMUST00000059743.11	+	91250311	91285741	Intron 8	28338	-6544	0.015495	1.000000	CCDS48322.1	ENSMUSG00000034343.14	Ube2f	protein_coding	OTTMUSG00000048490.1	OTTMUST00000124276.1	2	---	ENSMUSP00000054303.5	Ube2f-201	1	protein_coding
TetK27	chr1	91297687	91299773	2086	91298528	183	233.646	38.4641	230.268	TetK27_peak_1268	Scly	ENSMUST00000147523.7	+	91298407	91308816	TSS	0	-9043	0.131316	0.655007	---	ENSMUSG00000026307.12	Scly	protein_coding	OTTMUSG00000022404.1	OTTMUST00000053558.1	2	---	ENSMUSP00000114759.1	Scly-208	3	protein_coding
TetK27	chr1	91366479	91366856	377	91366585	17	7.42133	3.98811	5.57146	TetK27_peak_1269	Erfe	ENSMUST00000086861.11	+	91366430	91374218	TSS	49	-7362	0.048530	1.000000	CCDS48323.1	ENSMUSG00000047443.14	Erfe	protein_coding	OTTMUSG00000048491.1	OTTMUST00000124285.1	2	---	ENSMUSP00000084073.5	Erfe-201	1	protein_coding
TetK27	chr1	91380053	91380516	463	91380276	14	6.74667	4.05803	4.90229	TetK27_peak_1270	Ilkap	ENSMUST00000187678.6	-	91376055	91398802	3' UTR Exon	18286	-3998	0.020397	1.000000	---	ENSMUSG00000026309.14	Ilkap	protein_coding	OTTMUSG00000048492.1	OTTMUST00000124294.1	2	---	ENSMUSP00000140182.1	Ilkap-209	3	nonsense_mediated_decay
TetK27	chr1	91394956	91395312	356	91395137	12	5.2738	3.51696	3.47795	TetK27_peak_1271	Ilkap	ENSMUST00000189651.1	-	91390234	91398795	Intron 1	3483	-4722	0.041696	1.000000	---	ENSMUSG00000026309.14	Ilkap	protein_coding	OTTMUSG00000048492.1	OTTMUST00000124299.1	2	---	---	Ilkap-210	3	retained_intron
TetK27	chr1	91397657	91399609	1952	91398566	251	305.208	36.4051	301.337	TetK27_peak_1272	Ilkap	ENSMUST00000187105.6	-	91375832	91398756	TSS	0	-21825	0.047983	0.563236	---	ENSMUSG00000026309.14	Ilkap	protein_coding	OTTMUSG00000048492.1	OTTMUST00000124290.1	2	---	---	Ilkap-206	1	retained_intron
TetK27	chr1	91405885	91406136	251	91406005	11	4.58302	3.24643	2.81413	TetK27_peak_1273	1700020N18Rik	ENSMUST00000188956.1	-	91404879	91406030	TSS	0	-1006	0.126736	0.579365	---	ENSMUSG00000100253.1	1700020N18Rik	lincRNA	OTTMUSG00000045131.1	OTTMUST00000118602.1	2	---	---	1700020N18Rik-201	1	lincRNA
TetK27	chr1	91412376	91414518	2142	91413040	162	199.011	34.1819	195.829	TetK27_peak_1274	Hes6	ENSMUST00000132188.7	-	91411483	91413209	TSS	0	-893	0.482918	0.389174	---	ENSMUSG00000067071.8	Hes6	protein_coding	OTTMUSG00000020919.1	OTTMUST00000049448.1	2	---	---	Hes6-203	2	retained_intron
TetK27	chr1	91458314	91460419	2105	91459122	187	212.313	29.4499	209.056	TetK27_peak_1275	Per2	ENSMUST00000069620.9	-	91415982	91459325	TSS	0	-42332	0.023348	0.480532	CCDS35663.1	ENSMUSG00000055866.9	Per2	protein_coding	OTTMUSG00000048493.1	OTTMUST00000124300.1	2	---	ENSMUSP00000066620.8	Per2-201	1	protein_coding
TetK27	chr1	91494516	91495206	690	91494884	31	13.1876	4.62288	11.2091	TetK27_peak_1276	Traf3ip1	ENSMUST00000189341.6	+	91494647	91527957	TSS	0	-32751	0.016811	0.810420	---	ENSMUSG00000034292.13	Traf3ip1	protein_coding	OTTMUSG00000048497.1	OTTMUST00000124305.1	1	---	ENSMUSP00000140151.1	Traf3ip1-203	5	protein_coding
TetK27	chr1	91539705	91541472	1767	91540927	121	132.318	24.8027	129.485	TetK27_peak_1277	Asb1	ENSMUST00000186068.1	+	91540732	91554825	TSS	0	-13353	0.052576	0.419118	---	ENSMUSG00000026311.16	Asb1	protein_coding	OTTMUSG00000048498.1	OTTMUST00000124313.1	2	---	ENSMUSP00000140225.1	Asb1-204	1	protein_coding
TetK27	chr1	91625870	91626209	339	91626042	18	8.7091	4.4778	6.82036	TetK27_peak_1278	.	.	.	.	.	Intergenic	.	.	.	.	.	.	.	.	.	.	.	.	.	.	.	.
TetK27	chr1	91626667	91627123	456	91626887	15	7.52498	4.32857	5.65872	TetK27_peak_1279	.	.	.	.	.	Intergenic	.	.	.	.	.	.	.	.	.	.	.	.	.	.	.	.
TetK27	chr1	91824102	91824387	285	91824298	12	5.2738	3.51696	3.47795	TetK27_peak_1280	Twist2	ENSMUST00000007949.3	+	91801461	91848029	3' UTR Exon	22641	-23642	0.006141	1.000000	CCDS15166.1	ENSMUSG00000007805.4	Twist2	protein_coding	OTTMUSG00000021957.1	OTTMUST00000052122.1	2	---	ENSMUSP00000007949.3	Twist2-201	1	protein_coding
TetK27	chr1	91824679	91825404	725	91825037	20	11.7766	5.68125	9.81736	TetK27_peak_1281	Twist2	ENSMUST00000007949.3	+	91801461	91848029	3' UTR Exon	23218	-22625	0.015590	1.000000	CCDS15166.1	ENSMUSG00000007805.4	Twist2	protein_coding	OTTMUSG00000021957.1	OTTMUST00000052122.1	2	---	ENSMUSP00000007949.3	Twist2-201	1	protein_coding
TetK27	chr1	91825607	91826162	555	91825944	20	11.7766	5.68125	9.81736	TetK27_peak_1282	Twist2	ENSMUST00000007949.3	+	91801461	91848029	3' UTR Exon	24146	-21867	0.011939	1.000000	CCDS15166.1	ENSMUSG00000007805.4	Twist2	protein_coding	OTTMUSG00000021957.1	OTTMUST00000052122.1	2	---	ENSMUSP00000007949.3	Twist2-201	1	protein_coding
TetK27	chr1	91826477	91827093	616	91826864	15	7.52498	4.32857	5.65872	TetK27_peak_1283	Twist2	ENSMUST00000007949.3	+	91801461	91848029	3' UTR Exon	25016	-20936	0.013249	1.000000	CCDS15166.1	ENSMUSG00000007805.4	Twist2	protein_coding	OTTMUSG00000021957.1	OTTMUST00000052122.1	2	---	ENSMUSP00000007949.3	Twist2-201	1	protein_coding
TetK27	chr1	91941133	91941446	313	91941237	13	5.99569	3.7875	4.17465	TetK27_peak_1284	Hdac4	ENSMUST00000008995.14	-	91932757	92148394	Intron 23	206948	-8376	0.001456	1.000000	CCDS48324.1	ENSMUSG00000026313.16	Hdac4	protein_coding	OTTMUSG00000048554.1	---	3	---	ENSMUSP00000008995.8	Hdac4-201	1	protein_coding
TetK27	chr1	91941869	91942528	659	91942032	17	8.50705	4.5307	6.61891	TetK27_peak_1285	Hdac4	ENSMUST00000008995.14	-	91932757	92148394	Intron 23	205866	-9112	0.003061	1.000000	CCDS48324.1	ENSMUSG00000026313.16	Hdac4	protein_coding	OTTMUSG00000048554.1	---	3	---	ENSMUSP00000008995.8	Hdac4-201	1	protein_coding
TetK27	chr1	91942592	91942843	251	91942629	11	4.58302	3.24643	2.81413	TetK27_peak_1286	Hdac4	ENSMUST00000008995.14	-	91932757	92148394	Intron 23	205551	-9835	0.001169	1.000000	CCDS48324.1	ENSMUSG00000026313.16	Hdac4	protein_coding	OTTMUSG00000048554.1	---	3	---	ENSMUSP00000008995.8	Hdac4-201	1	protein_coding
TetK27	chr1	91942904	91943681	777	91943147	17	9.15743	4.86964	7.25158	TetK27_peak_1287	Hdac4	ENSMUST00000008995.14	-	91932757	92148394	Intron 23	204713	-10147	0.003608	1.000000	CCDS48324.1	ENSMUSG00000026313.16	Hdac4	protein_coding	OTTMUSG00000048554.1	---	3	---	ENSMUSP00000008995.8	Hdac4-201	1	protein_coding
TetK27	chr1	91975114	91975429	315	91975299	13	4.38771	2.93587	2.64425	TetK27_peak_1288	Gm37048	ENSMUST00000194827.1	+	91975987	91981565	TSS	-558	-6136	0.000000	0.000000	---	ENSMUSG00000103101.1	Gm37048	TEC	OTTMUSG00000048556.1	OTTMUST00000124416.1	2	---	---	Gm37048-201		TEC
TetK27	chr1	91977944	91978475	531	91978100	13	5.99569	3.7875	4.17465	TetK27_peak_1289	Gm37048	ENSMUST00000194827.1	+	91975987	91981565	CDS Exon 1	1957	-3090	0.095358	1.000000	---	ENSMUSG00000103101.1	Gm37048	TEC	OTTMUSG00000048556.1	OTTMUST00000124416.1	2	---	---	Gm37048-201		TEC
TetK27	chr1	91983232	91983574	342	91983352	13	5.99569	3.7875	4.17465	TetK27_peak_1290	Hdac4	ENSMUST00000008995.14	-	91932757	92148394	Intron 10	164820	-50475	0.001591	1.000000	CCDS48324.1	ENSMUSG00000026313.16	Hdac4	protein_coding	OTTMUSG00000048554.1	---	3	---	ENSMUSP00000008995.8	Hdac4-201	1	protein_coding
TetK27	chr1	91984348	91984753	405	91984510	19	8.4142	4.1941	6.52664	TetK27_peak_1291	Hdac4	ENSMUST00000008995.14	-	91932757	92148394	CDS Exon 10	163641	-51591	0.001883	1.000000	CCDS48324.1	ENSMUSG00000026313.16	Hdac4	protein_coding	OTTMUSG00000048554.1	---	3	---	ENSMUSP00000008995.8	Hdac4-201	1	protein_coding
TetK27	chr1	92003735	92005093	1358	92004475	34	19.6335	6.59509	17.5571	TetK27_peak_1292	Hdac4	ENSMUST00000185267.1	-	92003670	92006861	TTS	1768	-65	0.425752	1.000000	---	ENSMUSG00000026313.16	Hdac4	protein_coding	OTTMUSG00000048554.1	OTTMUST00000124411.1	2	---	---	Hdac4-203		retained_intron
TetK27	chr1	92006643	92006989	346	92006844	15	7.52498	4.32857	5.65872	TetK27_peak_1293	Hdac4	ENSMUST00000189303.6	-	91932958	92006856	TSS	0	-73685	0.002896	0.616715	---	ENSMUSG00000026313.16	Hdac4	protein_coding	OTTMUSG00000048554.1	OTTMUST00000124407.1	2	---	---	Hdac4-208	1	processed_transcript
TetK27	chr1	92015391	92016730	1339	92015742	26	15.6375	6.38262	13.6156	TetK27_peak_1294	Hdac4	ENSMUST00000008995.14	-	91932757	92148394	Intron 3	131664	-82634	0.006214	1.000000	CCDS48324.1	ENSMUSG00000026313.16	Hdac4	protein_coding	OTTMUSG00000048554.1	---	3	---	ENSMUSP00000008995.8	Hdac4-201	1	protein_coding
TetK27	chr1	92050784	92051222	438	92050963	19	9.53241	4.72787	7.62311	TetK27_peak_1295	Hdac4	ENSMUST00000185341.6	-	92029966	92113332	Intron 2	62110	-20818	0.005266	1.000000	---	ENSMUSG00000026313.16	Hdac4	protein_coding	OTTMUSG00000048554.1	OTTMUST00000124413.1	2	---	---	Hdac4-204	2	processed_transcript
TetK27	chr1	92051561	92052170	609	92051793	21	11.1852	5.20066	9.24014	TetK27_peak_1296	Hdac4	ENSMUST00000185341.6	-	92029966	92113332	Intron 2	61162	-21595	0.007317	1.000000	---	ENSMUSG00000026313.16	Hdac4	protein_coding	OTTMUSG00000048554.1	OTTMUST00000124413.1	2	---	---	Hdac4-204	2	processed_transcript
TetK27	chr1	92058734	92059426	692	92058973	25	16.5309	7.03392	14.4964	TetK27_peak_1297	Hdac4	ENSMUST00000185341.6	-	92029966	92113332	Intron 1	53906	-28768	0.008313	1.000000	---	ENSMUSG00000026313.16	Hdac4	protein_coding	OTTMUSG00000048554.1	OTTMUST00000124413.1	2	---	---	Hdac4-204	2	processed_transcript
TetK27	chr1	92059658	92060217	559	92059973	12	5.2738	3.51696	3.47795	TetK27_peak_1298	Hdac4	ENSMUST00000185341.6	-	92029966	92113332	Intron 1	53115	-29692	0.006717	1.000000	---	ENSMUSG00000026313.16	Hdac4	protein_coding	OTTMUSG00000048554.1	OTTMUST00000124413.1	2	---	---	Hdac4-204	2	processed_transcript
TetK27	chr1	92063962	92065132	1170	92064739	34	23.5532	8.27377	21.4365	TetK27_peak_1299	Hdac4	ENSMUST00000185341.6	-	92029966	92113332	Intron 1	48200	-33996	0.014046	1.000000	---	ENSMUSG00000026313.16	Hdac4	protein_coding	OTTMUSG00000048554.1	OTTMUST00000124413.1	2	---	---	Hdac4-204	2	processed_transcript
TetK27	chr1	92079043	92080689	1646	92079885	87	85.1823	18.454	82.6072	TetK27_peak_1300	Hdac4	ENSMUST00000185341.6	-	92029966	92113332	Intron 1	32643	-49077	0.019756	1.000000	---	ENSMUSG00000026313.16	Hdac4	protein_coding	OTTMUSG00000048554.1	OTTMUST00000124413.1	2	---	---	Hdac4-204	2	processed_transcript
TetK27	chr1	92101104	92105262	4158	92103353	40	30.014	9.69213	27.829	TetK27_peak_1301	Hdac4	ENSMUST00000185341.6	-	92029966	92113332	Intron 1	8070	-71138	0.049888	1.000000	---	ENSMUSG00000026313.16	Hdac4	protein_coding	OTTMUSG00000048554.1	OTTMUST00000124413.1	2	---	---	Hdac4-204	2	processed_transcript
TetK27	chr1	92105604	92105870	266	92105779	15	7.52498	4.32857	5.65872	TetK27_peak_1302	Hdac4	ENSMUST00000185341.6	-	92029966	92113332	Intron 1	7462	-75638	0.003203	1.000000	---	ENSMUSG00000026313.16	Hdac4	protein_coding	OTTMUSG00000048554.1	OTTMUST00000124413.1	2	---	---	Hdac4-204	2	processed_transcript
TetK27	chr1	92106021	92106456	435	92106242	18	10.0089	5.14017	8.08393	TetK27_peak_1303	Hdac4	ENSMUST00000185341.6	-	92029966	92113332	Intron 1	6876	-76055	0.005230	1.000000	---	ENSMUSG00000026313.16	Hdac4	protein_coding	OTTMUSG00000048554.1	OTTMUST00000124413.1	2	---	---	Hdac4-204	2	processed_transcript
TetK27	chr1	92118649	92120103	1454	92119689	58	55.8771	15.9616	53.4842	TetK27_peak_1304	Hdac4	ENSMUST00000212408.1	-	92030144	92195700	Intron 2	75597	-88505	0.008789	1.000000	---	ENSMUSG00000026313.16	Hdac4	protein_coding	OTTMUSG00000048554.1	OTTMUST00000150352.1	2	---	---	Hdac4-211	5	processed_transcript
TetK27	chr1	92121379	92121788	409	92121620	12	5.2738	3.51696	3.47795	TetK27_peak_1305	Hdac4	ENSMUST00000212408.1	-	92030144	92195700	Intron 2	73912	-91235	0.002476	1.000000	---	ENSMUSG00000026313.16	Hdac4	protein_coding	OTTMUSG00000048554.1	OTTMUST00000150352.1	2	---	---	Hdac4-211	5	processed_transcript
TetK27	chr1	92121982	92123958	1976	92122829	31	22.7693	8.65714	20.656	TetK27_peak_1306	Hdac4	ENSMUST00000212408.1	-	92030144	92195700	Intron 2	71742	-91838	0.011942	1.000000	---	ENSMUSG00000026313.16	Hdac4	protein_coding	OTTMUSG00000048554.1	OTTMUST00000150352.1	2	---	---	Hdac4-211	5	processed_transcript
TetK27	chr1	92125209	92125465	256	92125337	16	8.32904	4.5991	6.44257	TetK27_peak_1307	Hdac4	ENSMUST00000212408.1	-	92030144	92195700	Intron 2	70235	-95065	0.001552	1.000000	---	ENSMUSG00000026313.16	Hdac4	protein_coding	OTTMUSG00000048554.1	OTTMUST00000150352.1	2	---	---	Hdac4-211	5	processed_transcript
TetK27	chr1	92127257	92127730	473	92127454	12	5.2738	3.51696	3.47795	TetK27_peak_1308	Hdac4	ENSMUST00000212408.1	-	92030144	92195700	Intron 2	67970	-97113	0.002863	1.000000	---	ENSMUSG00000026313.16	Hdac4	protein_coding	OTTMUSG00000048554.1	OTTMUST00000150352.1	2	---	---	Hdac4-211	5	processed_transcript
TetK27	chr1	92164144	92165248	1104	92164710	17	9.15743	4.86964	7.25158	TetK27_peak_1309	Hdac4	ENSMUST00000186002.2	-	92029955	92180298	5' UTR Exon	15050	-134189	0.007350	1.000000	---	ENSMUSG00000026313.16	Hdac4	protein_coding	OTTMUSG00000048554.1	OTTMUST00000124412.1	2	---	ENSMUSP00000141018.1	Hdac4-205	3	protein_coding
TetK27	chr1	92176944	92181726	4782	92180035	275	287.404	25.8168	283.671	TetK27_peak_1310	Hdac4	ENSMUST00000186002.2	-	92029955	92180298	TSS	0	-146989	0.022315	0.701443	---	ENSMUSG00000026313.16	Hdac4	protein_coding	OTTMUSG00000048554.1	OTTMUST00000124412.1	2	---	ENSMUSP00000141018.1	Hdac4-205	3	protein_coding
TetK27	chr1	92183089	92183932	843	92183517	42	35.4012	11.633	33.1647	TetK27_peak_1311	Hdac4	ENSMUST00000212408.1	-	92030144	92195700	Intron 1	11768	-152945	0.005098	1.000000	---	ENSMUSG00000026313.16	Hdac4	protein_coding	OTTMUSG00000048554.1	OTTMUST00000150352.1	2	---	---	Hdac4-211	5	processed_transcript
TetK27	chr1	92190208	92191153	945	92190573	29	15.2043	5.65293	13.1944	TetK27_peak_1312	Hdac4	ENSMUST00000212408.1	-	92030144	92195700	Intron 1	4547	-160064	0.005714	1.000000	---	ENSMUSG00000026313.16	Hdac4	protein_coding	OTTMUSG00000048554.1	OTTMUST00000150352.1	2	---	---	Hdac4-211	5	processed_transcript
TetK27	chr1	92191344	92193959	2615	92192619	54	46.4729	13.0016	44.1518	TetK27_peak_1313	Hdac4	ENSMUST00000212408.1	-	92030144	92195700	Intron 1	1741	-161200	0.015801	1.000000	---	ENSMUSG00000026313.16	Hdac4	protein_coding	OTTMUSG00000048554.1	OTTMUST00000150352.1	2	---	---	Hdac4-211	5	processed_transcript
TetK27	chr1	92202506	92202760	254	92202595	13	5.74149	3.64796	3.94169	TetK27_peak_1314	.	.	.	.	.	Intergenic	.	.	.	.	.	.	.	.	.	.	.	.	.	.	.	.
TetK27	chr1	92202992	92203366	374	92203118	17	9.15743	4.86964	7.25158	TetK27_peak_1315	.	.	.	.	.	Intergenic	.	.	.	.	.	.	.	.	.	.	.	.	.	.	.	.
TetK27	chr1	92468668	92469292	624	92468796	14	6.74667	4.05803	4.90229	TetK27_peak_1316	Ndufa10	ENSMUST00000189503.6	-	92439279	92473758	3' UTR Exon	4466	-29389	0.018126	1.000000	---	ENSMUSG00000026260.12	Ndufa10	protein_coding	OTTMUSG00000021762.1	OTTMUST00000124420.1	2	---	ENSMUSP00000140576.1	Ndufa10-207	5	nonsense_mediated_decay
TetK27	chr1	92473094	92474707	1613	92473598	206	242.057	32.4262	238.626	TetK27_peak_1317	Ndufa10	ENSMUST00000189582.1	-	92472779	92473768	TSS	0	-315	0.681818	0.418216	---	ENSMUSG00000026260.12	Ndufa10	protein_coding	OTTMUSG00000021762.1	OTTMUST00000124425.1	2	---	---	Ndufa10-208		retained_intron
TetK27	chr1	92639790	92642475	2685	92641744	174	218.846	36.6983	215.552	TetK27_peak_1318	Cops9	ENSMUST00000154129.7	-	92637145	92639910	TSS	0	-2645	0.043745	0.045048	---	ENSMUSG00000073616.10	Cops9	protein_coding	OTTMUSG00000022121.1	OTTMUST00000052506.1	2	---	---	Cops9-205	2	retained_intron
TetK27	chr1	92647967	92648850	883	92648328	25	16.5309	7.03392	14.4964	TetK27_peak_1319	Otos	ENSMUST00000053144.3	-	92644218	92648842	TSS	0	-3749	0.189405	0.990950	CCDS35668.1	ENSMUSG00000044055.5	Otos	protein_coding	OTTMUSG00000034772.1	OTTMUST00000088368.1	2	---	ENSMUSP00000061683.3	Otos-201	1	protein_coding
TetK27	chr1	92830703	92832424	1721	92831848	83	61.2296	11.2593	58.8057	TetK27_peak_1320	Gpc1	ENSMUST00000191373.1	+	92831969	92835678	TSS	0	-3254	0.122911	0.264808	---	ENSMUSG00000034220.7	Gpc1	protein_coding	OTTMUSG00000048573.1	OTTMUST00000124441.1	2	---	---	Gpc1-205	3	processed_transcript
TetK27	chr1	92905578	92906087	509	92905941	22	13.6241	6.22232	11.6331	TetK27_peak_1321	Dusp28	ENSMUST00000060913.7	+	92906981	92908436	TSS	-894	-2349	0.000000	0.000000	CCDS15179.1	ENSMUSG00000047067.7	Dusp28	protein_coding	OTTMUSG00000048631.1	OTTMUST00000124550.1	2	---	ENSMUSP00000057690.6	Dusp28-201	1	protein_coding
TetK27	chr1	92906442	92908296	1854	92907170	189	207.774	27.4483	204.544	TetK27_peak_1322	Dusp28	ENSMUST00000060913.7	+	92906981	92908436	TSS	0	-140	0.903846	0.709434	CCDS15179.1	ENSMUSG00000047067.7	Dusp28	protein_coding	OTTMUSG00000048631.1	OTTMUST00000124550.1	2	---	ENSMUSP00000057690.6	Dusp28-201	1	protein_coding
TetK27	chr1	92909853	92912399	2546	92911050	148	133.127	17.453	130.291	TetK27_peak_1323	Rnpepl1	ENSMUST00000179993.1	+	92911209	92915934	TSS	0	-3535	0.252010	0.467609	---	ENSMUSG00000026269.14	Rnpepl1	protein_coding	OTTMUSG00000042343.1	OTTMUST00000111576.1	2	---	ENSMUSP00000137624.1	Rnpepl1-211	3	protein_coding
TetK27	chr1	92933481	92935319	1838	92934521	195	267.292	46.3331	263.7	TetK27_peak_1324	Capn10	ENSMUST00000152983.7	+	92934833	92947930	TSS	0	-12611	0.037181	0.264818	---	ENSMUSG00000026270.11	Capn10	protein_coding	OTTMUSG00000026368.1	OTTMUST00000065212.1	2	---	ENSMUSP00000122158.1	Capn10-205	5	nonsense_mediated_decay
TetK27	chr1	93115079	93115333	254	93115302	13	5.99569	3.7875	4.17465	TetK27_peak_1325	.	.	.	.	.	Intergenic	.	.	.	.	.	.	.	.	.	.	.	.	.	.	.	.
TetK27	chr1	93305387	93306308	921	93305662	76	81.1476	20.8312	78.593	TetK27_peak_1326	Mterf4	ENSMUST00000152307.1	-	93303498	93305880	TSS	0	-1889	0.207302	0.535792	---	ENSMUSG00000026273.13	Mterf4	protein_coding	OTTMUSG00000021521.1	OTTMUST00000051044.1	2	---	---	Mterf4-205	1	retained_intron
TetK27	chr1	93342461	93344351	1890	93343822	144	148.22	22.714	145.305	TetK27_peak_1327	Ppp1r7	ENSMUST00000127141.1	+	93343707	93352581	TSS	0	-8230	0.072676	0.341089	---	ENSMUSG00000026275.13	Ppp1r7	protein_coding	OTTMUSG00000021853.1	OTTMUST00000051858.1	2	---	ENSMUSP00000124279.1	Ppp1r7-202	5	nonsense_mediated_decay
TetK27	chr1	93377430	93377681	251	93377628	12	5.2738	3.51696	3.47795	TetK27_peak_1328	Ano7	ENSMUST00000058682.10	+	93373930	93403403	Intron 3	3500	-25722	0.008550	1.000000	CCDS78656.1	ENSMUSG00000034107.10	Ano7	protein_coding	OTTMUSG00000048653.1	OTTMUST00000124597.1	2	---	ENSMUSP00000050495.5	Ano7-201	1	protein_coding
TetK27	chr1	93401229	93401687	458	93401477	18	10.0089	5.14017	8.08393	TetK27_peak_1329	Ano7	ENSMUST00000190340.1	+	93401861	93403571	TSS	-174	-1884	0.000000	0.000000	---	ENSMUSG00000034107.10	Ano7	protein_coding	OTTMUSG00000048653.1	OTTMUST00000124599.1	1	---	ENSMUSP00000139733.1	Ano7-203	3	protein_coding
TetK27	chr1	93444417	93446175	1758	93445407	125	133.325	23.7423	130.488	TetK27_peak_1330	Hdlbp	ENSMUST00000186787.6	-	93437119	93445433	TSS	0	-7298	0.122309	0.578169	---	ENSMUSG00000034088.15	Hdlbp	protein_coding	OTTMUSG00000048654.1	OTTMUST00000124606.1	2	---	ENSMUSP00000139719.1	Hdlbp-205	5	protein_coding
TetK27	chr1	93477704	93480248	2544	93479155	248	310.401	39.0054	306.489	TetK27_peak_1331	Sept2	ENSMUST00000142401.7	+	93479223	93499113	TSS	0	-18865	0.051581	0.403143	---	ENSMUSG00000026276.19	Sept2	protein_coding	OTTMUSG00000021857.1	OTTMUST00000051876.1	2	---	ENSMUSP00000121974.1	Sept2-206	2	protein_coding
TetK27	chr1	93511471	93512638	1167	93512334	102	100.528	19.4084	97.8677	TetK27_peak_1332	Farp2	ENSMUST00000122402.2	+	93512112	93581297	TSS	0	-68659	0.007617	0.451199	---	ENSMUSG00000034066.13	Farp2	protein_coding	OTTMUSG00000026441.1	OTTMUST00000065399.1	2	---	ENSMUSP00000113790.1	Farp2-202	1	protein_coding
TetK27	chr1	93634754	93636780	2026	93635522	208	254.563	35.7549	251.055	TetK27_peak_1333	Gm28536	ENSMUST00000190971.1	+	93635193	93636510	TSS	0	0	1.000000	0.650222	---	ENSMUSG00000100927.1	Gm28536	antisense_RNA	OTTMUSG00000048659.1	OTTMUST00000124617.1	2	---	---	Gm28536-201		antisense_RNA
TetK27	chr1	93668608	93669148	540	93668923	21	12.6908	5.95178	10.7156	TetK27_peak_1334	.	.	.	.	.	Intergenic	.	.	.	.	.	.	.	.	.	.	.	.	.	.	.	.
TetK27	chr1	93753719	93755667	1948	93755115	190	184.485	21.0455	181.381	TetK27_peak_1335	Thap4	ENSMUST00000189173.1	-	93724649	93754651	TSS	0	-29070	0.031097	0.478707	---	ENSMUSG00000026279.14	Thap4	protein_coding	OTTMUSG00000048661.1	OTTMUST00000124627.1	2	---	---	Thap4-203	1	retained_intron
TetK27	chr1	93800626	93806144	5518	93804083	308	336.255	28.9036	332.122	TetK27_peak_1336	Ing5	ENSMUST00000188402.1	+	93803983	93822102	TSS	0	-15958	0.119316	0.391738	---	ENSMUSG00000026283.13	Ing5	protein_coding	OTTMUSG00000048689.1	OTTMUST00000124679.1	2	---	ENSMUSP00000140739.1	Ing5-202	1	nonsense_mediated_decay
TetK27	chr1	93814785	93815103	318	93814934	21	9.93443	4.61351	8.02267	TetK27_peak_1337	Ing5	ENSMUST00000188402.1	+	93803983	93822102	3' UTR Exon	10802	-6999	0.017605	1.000000	---	ENSMUSG00000026283.13	Ing5	protein_coding	OTTMUSG00000048689.1	OTTMUST00000124679.1	2	---	ENSMUSP00000140739.1	Ing5-202	1	nonsense_mediated_decay
TetK27	chr1	93823746	93826853	3107	93825345	190	258.073	45.0137	254.542	TetK27_peak_1338	D2hgdh	ENSMUST00000097633.9	+	93825240	93852349	TSS	0	-25496	0.059535	0.519305	CCDS15196.1	ENSMUSG00000073609.9	D2hgdh	protein_coding	OTTMUSG00000021837.1	OTTMUST00000051829.1	2	---	ENSMUSP00000095235.3	D2hgdh-201	1	protein_coding
TetK27	chr1	94005910	94006314	404	94006072	20	11.7766	5.68125	9.81736	TetK27_peak_1339	Gal3st2c	ENSMUST00000097632.4	+	93990509	94017148	Intron 5	15401	-10834	0.015203	1.000000	CCDS48330.1	ENSMUSG00000073608.4	Gal3st2c	protein_coding	OTTMUSG00000048694.1	OTTMUST00000124691.1	2	---	ENSMUSP00000095234.3	Gal3st2c-201	1	protein_coding
TetK27	chr1	94024869	94027163	2294	94025406	40	33.0047	11.092	30.7894	TetK27_peak_1340	Neu4	ENSMUST00000190212.6	+	94020451	94025417	TTS	4418	0	0.110529	0.239216	CCDS78660.1	ENSMUSG00000034000.15	Neu4	protein_coding	OTTMUSG00000048695.1	OTTMUST00000124692.1	2	---	ENSMUSP00000140127.1	Neu4-202	1	protein_coding
TetK27	chr1	94032726	94033013	287	94032834	15	7.52498	4.32857	5.65872	TetK27_peak_1341	.	.	.	.	.	Intergenic	.	.	.	.	.	.	.	.	.	.	.	.	.	.	.	.
TetK27	chr1	94033163	94033835	672	94033383	23	14.5757	6.49285	12.5699	TetK27_peak_1342	.	.	.	.	.	Intergenic	.	.	.	.	.	.	.	.	.	.	.	.	.	.	.	.
TetK27	chr1	94033987	94050010	16023	94035215	241	370.292	65.4696	365.835	TetK27_peak_1343	Pdcd1	ENSMUST00000027507.7	-	94038305	94052554	TTS	2544	0	0.821474	0.730529	CCDS15200.1	ENSMUSG00000026285.7	Pdcd1	protein_coding	OTTMUSG00000048696.1	OTTMUST00000124694.1	2	---	ENSMUSP00000027507.6	Pdcd1-201	1	protein_coding
TetK27	chr1	94050143	94057276	7133	94052358	138	180.267	37.6044	177.184	TetK27_peak_1344	Pdcd1	ENSMUST00000027507.7	-	94038305	94052554	TSS	0	-11838	0.169263	0.338099	CCDS15200.1	ENSMUSG00000026285.7	Pdcd1	protein_coding	OTTMUSG00000048696.1	OTTMUST00000124694.1	2	---	ENSMUSP00000027507.6	Pdcd1-201	1	protein_coding
TetK27	chr1	94074251	94074680	429	94074453	15	7.52498	4.32857	5.65872	TetK27_peak_1345	.	.	.	.	.	Intergenic	.	.	.	.	.	.	.	.	.	.	.	.	.	.	.	.
TetK27	chr1	94074761	94079340	4579	94078804	27	18.5511	7.57499	16.4886	TetK27_peak_1346	.	.	.	.	.	Intergenic	.	.	.	.	.	.	.	.	.	.	.	.	.	.	.	.
TetK27	chr1	94090832	94092610	1778	94091778	25	16.5309	7.03392	14.4964	TetK27_peak_1347	.	.	.	.	.	Intergenic	.	.	.	.	.	.	.	.	.	.	.	.	.	.	.	.
TetK27	chr1	94469918	94470359	441	94470135	71	68.5054	17.0203	66.0299	TetK27_peak_1348	Gm7895	ENSMUST00000187459.1	-	94468715	94469888	TSS	-30	-1203	0.000000	0.000000	---	ENSMUSG00000100347.1	Gm7895	processed_pseudogene	OTTMUSG00000048698.1	OTTMUST00000124696.1	1	PGO:0000004	---	Gm7895-201		processed_pseudogene
TetK27	chr1	95267594	95269015	1421	95268699	57	54.5367	15.6911	52.153	TetK27_peak_1349	.	.	.	.	.	Intergenic	.	.	.	.	.	.	.	.	.	.	.	.	.	.	.	.
TetK27	chr1	95269227	95269570	343	95269422	16	8.32904	4.5991	6.44257	TetK27_peak_1350	.	.	.	.	.	Intergenic	.	.	.	.	.	.	.	.	.	.	.	.	.	.	.	.
TetK27	chr1	95312501	95314677	2176	95313810	258	307.105	34.7163	303.217	TetK27_peak_1351	Fam174a	ENSMUST00000059975.7	+	95313623	95335285	TSS	0	-20608	0.048701	0.484612	CCDS35674.1	ENSMUSG00000051185.9	Fam174a	protein_coding	OTTMUSG00000048750.1	OTTMUST00000124762.1	2	---	ENSMUSP00000057670.6	Fam174a-201	1	protein_coding
TetK27	chr1	95450691	95451449	758	95451223	20	10.3489	4.96426	8.42147	TetK27_peak_1352	.	.	.	.	.	Intergenic	.	.	.	.	.	.	.	.	.	.	.	.	.	.	.	.
TetK27	chr1	95604207	95604813	606	95604398	15	6.48548	3.7823	4.65898	TetK27_peak_1353	St8sia4	ENSMUST00000043336.10	-	95587682	95667572	Intron 4	62759	-16525	0.007598	1.000000	CCDS15201.1	ENSMUSG00000040710.10	St8sia4	protein_coding	OTTMUSG00000048753.1	OTTMUST00000124766.1	2	---	ENSMUSP00000043477.4	St8sia4-201	1	protein_coding
TetK27	chr1	95605320	95606600	1280	95605860	20	11.7766	5.68125	9.81736	TetK27_peak_1354	St8sia4	ENSMUST00000043336.10	-	95587682	95667572	Intron 4	60972	-17638	0.016034	1.000000	CCDS15201.1	ENSMUSG00000040710.10	St8sia4	protein_coding	OTTMUSG00000048753.1	OTTMUST00000124766.1	2	---	ENSMUSP00000043477.4	St8sia4-201	1	protein_coding
TetK27	chr1	95654808	95657734	2926	95655841	52	47.9484	14.3384	45.6112	TetK27_peak_1355	St8sia4	ENSMUST00000043336.10	-	95587682	95667572	Intron 2	9838	-67126	0.036637	1.000000	CCDS15201.1	ENSMUSG00000040710.10	St8sia4	protein_coding	OTTMUSG00000048753.1	OTTMUST00000124766.1	2	---	ENSMUSP00000043477.4	St8sia4-201	1	protein_coding
TetK27	chr1	95657995	95658278	283	95658207	14	6.74667	4.05803	4.90229	TetK27_peak_1356	St8sia4	ENSMUST00000187936.1	-	95658314	95667569	TTS	9291	36	0.000000	0.000000	---	ENSMUSG00000040710.10	St8sia4	protein_coding	OTTMUSG00000048753.1	OTTMUST00000124768.1	2	---	---	St8sia4-203	1	retained_intron
TetK27	chr1	95663874	95668509	4635	95667345	137	158.952	28.9393	155.979	TetK27_peak_1357	St8sia4	ENSMUST00000043336.10	-	95587682	95667572	TSS	0	-76192	0.046301	0.797886	CCDS15201.1	ENSMUSG00000040710.10	St8sia4	protein_coding	OTTMUSG00000048753.1	OTTMUST00000124766.1	2	---	ENSMUSP00000043477.4	St8sia4-201	1	protein_coding
TetK27	chr1	95745077	95745328	251	95745185	12	5.2738	3.51696	3.47795	TetK27_peak_1358	.	.	.	.	.	Intergenic	.	.	.	.	.	.	.	.	.	.	.	.	.	.	.	.
TetK27	chr1	95754204	95755101	897	95754619	19	10.8823	5.41071	8.93972	TetK27_peak_1359	.	.	.	.	.	Intergenic	.	.	.	.	.	.	.	.	.	.	.	.	.	.	.	.
TetK27	chr1	97580377	97581256	879	97580836	22	12.0406	5.43705	10.0789	TetK27_peak_1360	.	.	.	.	.	Intergenic	.	.	.	.	.	.	.	.	.	.	.	.	.	.	.	.
TetK27	chr1	97660716	97662374	1658	97661774	62	53.4427	13.5526	51.0677	TetK27_peak_1361	D1Ertd622e	ENSMUST00000142234.1	-	97645935	97661677	TSS	0	-14781	0.061107	0.579867	---	ENSMUSG00000044768.16	D1Ertd622e	protein_coding	OTTMUSG00000021769.1	OTTMUST00000051673.1	2	---	ENSMUSP00000137803.1	D1Ertd622e-202	2	protein_coding
TetK27	chr1	97745476	97747088	1612	97746608	36	28.339	10.0098	26.168	TetK27_peak_1362	Ppip5k2	ENSMUST00000152788.1	-	97742171	97746137	TSS	0	-3305	0.166877	0.410415	---	ENSMUSG00000040648.14	Ppip5k2	protein_coding	OTTMUSG00000021900.1	OTTMUST00000052013.1	2	---	---	Ppip5k2-204	1	retained_intron
TetK27	chr1	97763809	97764807	998	97764157	20	11.7766	5.68125	9.81736	TetK27_peak_1363	Ppip5k2	ENSMUST00000112845.7	-	97706048	97770412	5' UTR Exon	5605	-57761	0.015521	1.000000	---	ENSMUSG00000040648.14	Ppip5k2	protein_coding	OTTMUSG00000021900.1	OTTMUST00000052012.1	2	---	ENSMUSP00000108466.1	Ppip5k2-202	5	protein_coding
TetK27	chr1	97764895	97765333	438	97765145	14	6.74667	4.05803	4.90229	TetK27_peak_1364	Ppip5k2	ENSMUST00000112845.7	-	97706048	97770412	5' UTR Exon	5079	-58847	0.006820	1.000000	---	ENSMUSG00000040648.14	Ppip5k2	protein_coding	OTTMUSG00000021900.1	OTTMUST00000052012.1	2	---	ENSMUSP00000108466.1	Ppip5k2-202	5	protein_coding
TetK27	chr1	97767159	97767474	315	97767304	13	5.99569	3.7875	4.17465	TetK27_peak_1365	Ppip5k2	ENSMUST00000112845.7	-	97706048	97770412	5' UTR Exon	2938	-61111	0.004910	1.000000	---	ENSMUSG00000040648.14	Ppip5k2	protein_coding	OTTMUSG00000021900.1	OTTMUST00000052012.1	2	---	ENSMUSP00000108466.1	Ppip5k2-202	5	protein_coding
TetK27	chr1	97767530	97771039	3509	97769783	189	249.815	42.0967	246.336	TetK27_peak_1366	Ppip5k2	ENSMUST00000112845.7	-	97706048	97770412	TSS	0	-61482	0.044791	0.821368	---	ENSMUSG00000040648.14	Ppip5k2	protein_coding	OTTMUSG00000021900.1	OTTMUST00000052012.1	2	---	ENSMUSP00000108466.1	Ppip5k2-202	5	protein_coding
TetK27	chr1	97949218	97949659	441	97949439	32	23.8582	8.92767	21.733	TetK27_peak_1367	Gm3531	ENSMUST00000162698.1	-	97948901	97949390	TSS	0	-317	0.353061	0.391403	---	ENSMUSG00000089782.1	Gm3531	processed_pseudogene	OTTMUSG00000034775.1	OTTMUST00000088376.1	2	PGO:0000004	---	Gm3531-201		processed_pseudogene
TetK27	chr1	97963630	97963881	251	97963768	14	6.74667	4.05803	4.90229	TetK27_peak_1368	Pam	ENSMUST00000162426.1	-	97957396	97977245	Intron 2	13364	-6234	0.012695	1.000000	---	ENSMUSG00000026335.16	Pam	protein_coding	OTTMUSG00000034777.1	OTTMUST00000088385.1	2	---	---	Pam-211	3	processed_transcript
TetK27	chr1	98095030	98096041	1011	98095590	50	37.6077	10.3683	35.3574	TetK27_peak_1369	Pam	ENSMUST00000058762.14	-	97821094	98095622	TSS	0	-273936	0.002160	0.585968	---	ENSMUSG00000026335.16	Pam	protein_coding	OTTMUSG00000034777.1	OTTMUST00000088381.1	2	---	ENSMUSP00000057112.8	Pam-201	1	protein_coding
TetK27	chr1	98131449	98131819	370	98131638	23	14.5757	6.49285	12.5699	TetK27_peak_1370	1810006J02Rik	ENSMUST00000186473.1	+	98131467	98144656	TSS	0	-12837	0.026763	0.951482	---	ENSMUSG00000100182.6	1810006J02Rik	lincRNA	OTTMUSG00000045527.1	OTTMUST00000119366.1	2	---	---	1810006J02Rik-201	1	lincRNA
TetK27	chr1	98589323	98590602	1279	98589740	28	19.5842	7.84553	17.5081	TetK27_peak_1371	Gm7967	ENSMUST00000190991.1	+	98589518	98607145	TSS	0	-16543	0.061550	0.847656	---	ENSMUSG00000100009.6	Gm7967	lincRNA	OTTMUSG00000048834.1	OTTMUST00000124927.1	2	---	---	Gm7967-201	3	lincRNA
TetK27	chr1	100231617	100232022	405	100231799	15	5.6314	3.35528	3.8322	TetK27_peak_1372	Cntnap5b	ENSMUST00000188735.1	+	100097761	100485943	Intron 5	133856	-253921	0.001046	1.000000	---	ENSMUSG00000067028.11	Cntnap5b	protein_coding	OTTMUSG00000048875.1	OTTMUST00000124973.1	1	---	ENSMUSP00000139877.1	Cntnap5b-203	1	protein_coding
TetK27	chr1	101901557	101903459	1902	101902676	77	82.6091	21.1018	80.0461	TetK27_peak_1373	.	.	.	.	.	Intergenic	.	.	.	.	.	.	.	.	.	.	.	.	.	.	.	.
TetK27	chr1	104293754	104294245	491	104293955	22	12.3753	5.5988	10.4117	TetK27_peak_1374	.	.	.	.	.	Intergenic	.	.	.	.	.	.	.	.	.	.	.	.	.	.	.	.
TetK27	chr1	105356013	105356841	828	105356206	22	13.6241	6.22232	11.6331	TetK27_peak_1375	Rnf152	ENSMUST00000172299.1	-	105276917	105356711	TSS	0	-79096	0.008760	0.843185	CCDS15204.1	ENSMUSG00000047496.6	Rnf152	protein_coding	OTTMUSG00000048957.1	---	3	---	ENSMUSP00000128632.1	Rnf152-202	2	protein_coding
TetK27	chr1	105455957	105456213	256	105455989	19	10.8823	5.41071	8.93972	TetK27_peak_1376	Gm3608	ENSMUST00000086725.5	+	105455971	105458830	TSS	0	-2617	0.084965	0.945525	---	ENSMUSG00000067017.5	Gm3608	pseudogene	---	---	3	---	---	Gm3608-201		pseudogene
TetK27	chr1	105662812	105664906	2094	105664303	152	192.783	36.1682	189.634	TetK27_peak_1377	2310035C23Rik	ENSMUST00000190501.6	+	105663923	105753712	TSS	0	-88806	0.010959	0.469690	CCDS48334.1	ENSMUSG00000026319.13	2310035C23Rik	protein_coding	OTTMUSG00000048965.1	OTTMUST00000125098.1	2	---	ENSMUSP00000141162.1	2310035C23Rik-210	1	protein_coding
TetK27	chr1	105970965	105972721	1756	105971803	106	127.155	28.9473	124.348	TetK27_peak_1378	.	.	.	.	.	Intergenic	.	.	.	.	.	.	.	.	.	.	.	.	.	.	.	.
TetK27	chr1	105989644	105992510	2866	105990551	188	219.764	31.5007	216.467	TetK27_peak_1379	Gm7160	ENSMUST00000185535.1	-	105979350	105990283	TSS	0	-10294	0.058533	0.223230	---	ENSMUSG00000099843.1	Gm7160	lincRNA	OTTMUSG00000048971.1	OTTMUST00000125114.1	2	---	---	Gm7160-201	2	lincRNA
TetK27	chr1	105992693	105992982	289	105992790	16	8.32904	4.5991	6.44257	TetK27_peak_1380	Zcchc2	ENSMUST00000119166.7	+	105990689	106034068	Intron 1	2004	-41086	0.006685	1.000000	CCDS48336.1	ENSMUSG00000038866.15	Zcchc2	protein_coding	OTTMUSG00000026946.1	OTTMUST00000066617.1	2	---	ENSMUSP00000113128.1	Zcchc2-202	1	protein_coding
TetK27	chr1	105993245	105994495	1250	105993840	128	150.951	29.4636	148.021	TetK27_peak_1381	Zcchc2	ENSMUST00000119166.7	+	105990689	106034068	Intron 1	2556	-39573	0.028838	1.000000	CCDS48336.1	ENSMUSG00000038866.15	Zcchc2	protein_coding	OTTMUSG00000026946.1	OTTMUST00000066617.1	2	---	ENSMUSP00000113128.1	Zcchc2-202	1	protein_coding
TetK27	chr1	106145328	106145888	560	106145428	17	9.15743	4.86964	7.25158	TetK27_peak_1382	.	.	.	.	.	Intergenic	.	.	.	.	.	.	.	.	.	.	.	.	.	.	.	.
TetK27	chr1	106151968	106152271	303	106152046	17	8.50705	4.5307	6.61891	TetK27_peak_1383	.	.	.	.	.	Intergenic	.	.	.	.	.	.	.	.	.	.	.	.	.	.	.	.
TetK27	chr1	106170725	106173211	2486	106171861	214	264.416	36.7814	260.843	TetK27_peak_1384	Phlpp1	ENSMUST00000061047.6	+	106171752	106394251	TSS	0	-221040	0.006562	0.587053	CCDS48337.1	ENSMUSG00000044340.7	Phlpp1	protein_coding	OTTMUSG00000021548.1	OTTMUST00000051100.1	2	---	ENSMUSP00000056530.6	Phlpp1-201	1	protein_coding
TetK27	chr1	106187716	106188658	942	106187905	25	16.5309	7.03392	14.4964	TetK27_peak_1385	Phlpp1	ENSMUST00000061047.6	+	106171752	106394251	Intron 1	15964	-205593	0.004238	1.000000	CCDS48337.1	ENSMUSG00000044340.7	Phlpp1	protein_coding	OTTMUSG00000021548.1	OTTMUST00000051100.1	2	---	ENSMUSP00000056530.6	Phlpp1-201	1	protein_coding
TetK27	chr1	106204187	106204666	479	106204417	19	10.8823	5.41071	8.93972	TetK27_peak_1386	Phlpp1	ENSMUST00000061047.6	+	106171752	106394251	Intron 1	32435	-189585	0.002157	1.000000	CCDS48337.1	ENSMUSG00000044340.7	Phlpp1	protein_coding	OTTMUSG00000021548.1	OTTMUST00000051100.1	2	---	ENSMUSP00000056530.6	Phlpp1-201	1	protein_coding
TetK27	chr1	106376091	106376361	270	106376215	15	7.52498	4.32857	5.65872	TetK27_peak_1387	Phlpp1	ENSMUST00000061047.6	+	106171752	106394251	CDS Exon 13	204339	-17890	0.001218	1.000000	CCDS48337.1	ENSMUSG00000044340.7	Phlpp1	protein_coding	OTTMUSG00000021548.1	OTTMUST00000051100.1	2	---	ENSMUSP00000056530.6	Phlpp1-201	1	protein_coding
TetK27	chr1	106514597	106514860	263	106514665	13	5.99569	3.7875	4.17465	TetK27_peak_1388	.	.	.	.	.	Intergenic	.	.	.	.	.	.	.	.	.	.	.	.	.	.	.	.
TetK27	chr1	106515143	106515453	310	106515281	15	7.52498	4.32857	5.65872	TetK27_peak_1389	.	.	.	.	.	Intergenic	.	.	.	.	.	.	.	.	.	.	.	.	.	.	.	.
TetK27	chr1	106515687	106516504	817	106516015	44	37.8375	12.1741	35.5808	TetK27_peak_1390	.	.	.	.	.	Intergenic	.	.	.	.	.	.	.	.	.	.	.	.	.	.	.	.
TetK27	chr1	106522275	106523522	1247	106523038	40	33.0047	11.092	30.7894	TetK27_peak_1391	.	.	.	.	.	Intergenic	.	.	.	.	.	.	.	.	.	.	.	.	.	.	.	.
TetK27	chr1	106548942	106549693	751	106549506	19	10.8823	5.41071	8.93972	TetK27_peak_1392	Bcl2	ENSMUST00000112751.1	-	106538178	106714275	Intron 1	164582	-10764	0.004270	1.000000	CCDS15209.1	ENSMUSG00000057329.7	Bcl2	protein_coding	OTTMUSG00000022128.1	OTTMUST00000052517.1	2	---	ENSMUSP00000108371.1	Bcl2-201	1	protein_coding
TetK27	chr1	106559222	106559574	352	106559424	13	5.99569	3.7875	4.17465	TetK27_peak_1393	Bcl2	ENSMUST00000112751.1	-	106538178	106714275	Intron 1	154701	-21044	0.002005	1.000000	CCDS15209.1	ENSMUSG00000057329.7	Bcl2	protein_coding	OTTMUSG00000022128.1	OTTMUST00000052517.1	2	---	ENSMUSP00000108371.1	Bcl2-201	1	protein_coding
TetK27	chr1	106559961	106564818	4857	106561681	72	75.3583	19.7491	72.8388	TetK27_peak_1394	Bcl2	ENSMUST00000112751.1	-	106538178	106714275	Intron 1	149457	-21783	0.027587	1.000000	CCDS15209.1	ENSMUSG00000057329.7	Bcl2	protein_coding	OTTMUSG00000022128.1	OTTMUST00000052517.1	2	---	ENSMUSP00000108371.1	Bcl2-201	1	protein_coding
TetK27	chr1	106564934	106568680	3746	106566993	62	61.3104	17.0437	58.8813	TetK27_peak_1395	D630008O14Rik	ENSMUST00000149909.1	+	106541943	106575046	CDS Exon 3	22991	-6366	0.113189	1.000000	---	ENSMUSG00000054006.14	D630008O14Rik	antisense_RNA	OTTMUSG00000022132.1	OTTMUST00000052532.1	2	---	---	D630008O14Rik-202	1	antisense_RNA
TetK27	chr1	106568829	106571200	2371	106570087	89	87.934	18.8734	85.3432	TetK27_peak_1396	D630008O14Rik	ENSMUST00000149909.1	+	106541943	106575046	CDS Exon 4	26886	-3846	0.071653	1.000000	---	ENSMUSG00000054006.14	D630008O14Rik	antisense_RNA	OTTMUSG00000022132.1	OTTMUST00000052532.1	2	---	---	D630008O14Rik-202	1	antisense_RNA
TetK27	chr1	106581328	106582017	689	106581768	15	6.48548	3.7823	4.65898	TetK27_peak_1397	Bcl2	ENSMUST00000112751.1	-	106538178	106714275	Intron 1	132258	-43150	0.003918	1.000000	CCDS15209.1	ENSMUSG00000057329.7	Bcl2	protein_coding	OTTMUSG00000022128.1	OTTMUST00000052517.1	2	---	ENSMUSP00000108371.1	Bcl2-201	1	protein_coding
TetK27	chr1	106582212	106582631	419	106582569	12	5.2738	3.51696	3.47795	TetK27_peak_1398	Bcl2	ENSMUST00000112751.1	-	106538178	106714275	Intron 1	131644	-44034	0.002385	1.000000	CCDS15209.1	ENSMUSG00000057329.7	Bcl2	protein_coding	OTTMUSG00000022128.1	OTTMUST00000052517.1	2	---	ENSMUSP00000108371.1	Bcl2-201	1	protein_coding
TetK27	chr1	106583292	106583691	399	106583486	18	10.0089	5.14017	8.08393	TetK27_peak_1399	Bcl2	ENSMUST00000112751.1	-	106538178	106714275	Intron 1	130584	-45114	0.002271	1.000000	CCDS15209.1	ENSMUSG00000057329.7	Bcl2	protein_coding	OTTMUSG00000022128.1	OTTMUST00000052517.1	2	---	ENSMUSP00000108371.1	Bcl2-201	1	protein_coding
TetK27	chr1	106600510	106601685	1175	106601121	37	29.4889	10.2804	27.3063	TetK27_peak_1400	Bcl2	ENSMUST00000112751.1	-	106538178	106714275	Intron 1	112590	-62332	0.006678	1.000000	CCDS15209.1	ENSMUSG00000057329.7	Bcl2	protein_coding	OTTMUSG00000022128.1	OTTMUST00000052517.1	2	---	ENSMUSP00000108371.1	Bcl2-201	1	protein_coding
TetK27	chr1	106601902	106603576	1674	106602681	24	12.3552	5.24262	10.3919	TetK27_peak_1401	Bcl2	ENSMUST00000112751.1	-	106538178	106714275	Intron 1	110699	-63724	0.009512	1.000000	CCDS15209.1	ENSMUSG00000057329.7	Bcl2	protein_coding	OTTMUSG00000022128.1	OTTMUST00000052517.1	2	---	ENSMUSP00000108371.1	Bcl2-201	1	protein_coding
TetK27	chr1	106612013	106613398	1385	106612927	46	40.312	12.7152	38.0347	TetK27_peak_1402	Bcl2	ENSMUST00000112751.1	-	106538178	106714275	Intron 1	100877	-73835	0.007871	1.000000	CCDS15209.1	ENSMUSG00000057329.7	Bcl2	protein_coding	OTTMUSG00000022128.1	OTTMUST00000052517.1	2	---	ENSMUSP00000108371.1	Bcl2-201	1	protein_coding
TetK27	chr1	106646523	106647974	1451	106647584	64	64.0686	17.5848	61.6208	TetK27_peak_1403	Bcl2	ENSMUST00000112751.1	-	106538178	106714275	Intron 1	66301	-108345	0.008245	1.000000	CCDS15209.1	ENSMUSG00000057329.7	Bcl2	protein_coding	OTTMUSG00000022128.1	OTTMUST00000052517.1	2	---	ENSMUSP00000108371.1	Bcl2-201	1	protein_coding
TetK27	chr1	106648439	106648913	474	106648687	16	8.32904	4.5991	6.44257	TetK27_peak_1404	Bcl2	ENSMUST00000112751.1	-	106538178	106714275	Intron 1	65362	-110261	0.002697	1.000000	CCDS15209.1	ENSMUSG00000057329.7	Bcl2	protein_coding	OTTMUSG00000022128.1	OTTMUST00000052517.1	2	---	ENSMUSP00000108371.1	Bcl2-201	1	protein_coding
TetK27	chr1	106650467	106650881	414	106650748	12	5.2738	3.51696	3.47795	TetK27_peak_1405	Bcl2	ENSMUST00000112751.1	-	106538178	106714275	Intron 1	63394	-112289	0.002357	1.000000	CCDS15209.1	ENSMUSG00000057329.7	Bcl2	protein_coding	OTTMUSG00000022128.1	OTTMUST00000052517.1	2	---	ENSMUSP00000108371.1	Bcl2-201	1	protein_coding
TetK27	chr1	106677981	106678463	482	106678158	18	10.0089	5.14017	8.08393	TetK27_peak_1406	Bcl2	ENSMUST00000112751.1	-	106538178	106714275	Intron 1	35812	-139803	0.002743	1.000000	CCDS15209.1	ENSMUSG00000057329.7	Bcl2	protein_coding	OTTMUSG00000022128.1	OTTMUST00000052517.1	2	---	ENSMUSP00000108371.1	Bcl2-201	1	protein_coding
TetK27	chr1	106684362	106684697	335	106684516	12	5.2738	3.51696	3.47795	TetK27_peak_1407	Bcl2	ENSMUST00000112751.1	-	106538178	106714275	Intron 1	29578	-146184	0.001908	1.000000	CCDS15209.1	ENSMUSG00000057329.7	Bcl2	protein_coding	OTTMUSG00000022128.1	OTTMUST00000052517.1	2	---	ENSMUSP00000108371.1	Bcl2-201	1	protein_coding
TetK27	chr1	106687181	106688927	1746	106687958	64	45.6972	10.1821	43.3785	TetK27_peak_1408	Bcl2	ENSMUST00000112751.1	-	106538178	106714275	Intron 1	25348	-149003	0.009921	1.000000	CCDS15209.1	ENSMUSG00000057329.7	Bcl2	protein_coding	OTTMUSG00000022128.1	OTTMUST00000052517.1	2	---	ENSMUSP00000108371.1	Bcl2-201	1	protein_coding
TetK27	chr1	106707908	106708195	287	106707999	20	11.7766	5.68125	9.81736	TetK27_peak_1409	Bcl2	ENSMUST00000112751.1	-	106538178	106714275	Intron 1	6080	-169730	0.001635	1.000000	CCDS15209.1	ENSMUSG00000057329.7	Bcl2	protein_coding	OTTMUSG00000022128.1	OTTMUST00000052517.1	2	---	ENSMUSP00000108371.1	Bcl2-201	1	protein_coding
TetK27	chr1	106709150	106709659	509	106709311	14	6.74667	4.05803	4.90229	TetK27_peak_1410	Bcl2	ENSMUST00000112751.1	-	106538178	106714275	Intron 1	4616	-170972	0.002896	1.000000	CCDS15209.1	ENSMUSG00000057329.7	Bcl2	protein_coding	OTTMUSG00000022128.1	OTTMUST00000052517.1	2	---	ENSMUSP00000108371.1	Bcl2-201	1	protein_coding
TetK27	chr1	106711354	106715419	4065	106714583	271	390.601	57.0397	385.94	TetK27_peak_1411	Bcl2	ENSMUST00000189999.1	-	106710339	106713180	TSS	0	-1015	0.642857	0.449336	CCDS78667.1	ENSMUSG00000057329.7	Bcl2	protein_coding	OTTMUSG00000022128.1	OTTMUST00000124369.1	2	---	ENSMUSP00000139856.1	Bcl2-202		protein_coding
TetK27	chr1	106758609	106760647	2038	106759400	189	233.354	35.8019	229.977	TetK27_peak_1412	Kdsr	ENSMUST00000010049.5	-	106720459	106759728	TSS	0	-38150	0.028520	0.549289	CCDS15210.1	ENSMUSG00000009905.5	Kdsr	protein_coding	OTTMUSG00000048603.1	OTTMUST00000124507.1	2	---	ENSMUSP00000010049.4	Kdsr-201	1	protein_coding
TetK27	chr1	106795515	106797401	1886	106796452	298	424.255	56.3409	419.215	TetK27_peak_1413	Vps4b	ENSMUST00000126057.1	-	106791100	106796578	TSS	0	-4415	0.194196	0.563858	---	ENSMUSG00000009907.17	Vps4b	protein_coding	OTTMUSG00000021646.1	OTTMUST00000051391.1	2	---	---	Vps4b-203	2	retained_intron
TetK27	chr1	106866833	106867133	300	106867006	13	5.99569	3.7875	4.17465	TetK27_peak_1414	Serpinb5	ENSMUST00000188745.2	+	106861174	106880344	5' UTR Exon	5659	-13211	0.015701	1.000000	---	ENSMUSG00000067006.12	Serpinb5	protein_coding	OTTMUSG00000020990.1	OTTMUST00000124511.1	1	---	ENSMUSP00000140264.1	Serpinb5-204	3	protein_coding
[truncated: 131,863 more rows]

## Sheet: H3K4me3
Sample.name	Chromosome	Start	End	Length	Absolute.summit	Pileup	X.log10.pvalue.	Fold.enrichment	X.log10.qvalue.	Peak.name	Gene.IDs	Transcript.IDs	Strand	Transcript.start	Transcript.end	Gene.section	Distance.to.TSS	Distance.to.TTS	X..transcript.overlap	X..peak.overlap	ccdsid	gene_id	gene_name	gene_type	havana_gene	havana_transcript	level	ont	protein_id	transcript_name	transcript_support_level	transcript_type
[truncated: 49,304 more rows]

[truncated: 1 more sheets: H3K27me3]
