# Supplementary material for: T-follicular helper cells are epigenetically poised to transdifferentiate into T-regulatory type 1 cells
Source: eLife. 2024 Nov 22;13:RP97665. doi: 10.7554/eLife.97665 (PMC11584177; doi:10.7554/eLife.97665)
Supplement: Figure 3—source data 2. [file elife-97665-fig3-data2.xlsx]

## Sheet: H3K27Ac
Region.ID	Gene.IDs	Transcript.IDs	Gene.section	P.value..Tet.vs..TFH.	FDR.step.up..Tet.vs..TFH.	Ratio..Tet.vs..TFH.	Fold.change..Tet.vs..TFH.	LSMean.Tet...Tet.vs..TFH.	LSMean.TFH...Tet.vs..TFH.	P.value..Tet.vs..Th0.	FDR.step.up..Tet.vs..Th0.	Ratio..Tet.vs..Th0.	Fold.change..Tet.vs..Th0.	LSMean.Tet...Tet.vs..Th0.	LSMean.Th0...Tet.vs..Th0.	P.value..TFH.vs..Th0.	FDR.step.up..TFH.vs..Th0.	Ratio..TFH.vs..Th0.	Fold.change..TFH.vs..Th0.	LSMean.TFH...TFH.vs..Th0.	LSMean.Th0...TFH.vs..Th0.
chr9:61825784-61829117	.	.	Intergenic	1.854441347911026E-9	2.0004415152320612E-4	2.6617139435772854E0	2.6617139435772854E0	138.03365179466695E0	51.8589355282682E0	4.87006149197945E-13	1.2813369349373152E-9	28.85129223749822E0	28.85129223749822E0	138.03365179466695E0	4.784314361325683E0	6.118654160907652E-7	1.5904520007219063E-4	10.839366231339913E0	10.839366231339913E0	51.8589355282682E0	4.784314361325683E0
chr10:116914977-116919699	Rab3ip	ENSMUST00000219570.1	TTS	5.189610475467661E-9	2.7990942541006146E-4	6.152215929359153E0	6.152215929359153E0	73.93796177785416E0	12.01810252221689E0	0.00449760759938871E0	0.13639876990971558E0	0.6538336041473635E0	-1.529441120274106E0	73.93796177785416E0	113.0837590923053E0	1.494489681544076E-13	5.373836180573471E-10	0.10627611443661897E0	-9.409452023167264E0	12.01810252221689E0	113.0837590923053E0
chr1:171978479-171983034	.	.	Intergenic	1.1685816838981816E-7	0.004201947066238284E0	6.718089757762022E0	6.718089757762022E0	59.724511495655946E0	8.890103236065102E0	8.703757182829059E-8	2.9620269521789257E-5	7.832721778749879E0	7.832721778749879E0	59.724511495655946E0	7.625001012762657E0	0.7558022241481539E0	0.9407315911137611E0	1.1659150236419544E0	1.1659150236419544E0	8.890103236065102E0	7.625001012762657E0
chr9:15495837-15504753	Smco4	ENSMUST00000045620.9	TSS	3.975265320942431E-7	0.009616804985393324E0	0.5385795648228331E0	-1.8567358758384236E0	103.29726922249785E0	191.79574564155192E0	1.818143498904794E-12	3.84565869916386E-9	8.128308630399687E0	8.128308630399687E0	103.29726922249785E0	12.708335020174856E0	7.38131561877975E-21	9.95305824680785E-17	15.092122243950174E0	15.092122243950174E0	191.79574564155192E0	12.708335020174856E0
chr1:165801319-165806085	Cd247	ENSMUST00000005907.11	Intron 1	4.973337216084887E-7	0.009616804985393324E0	2.175444469107314E0	2.175444469107314E0	132.8724539263247E0	61.07830184277169E0	2.4832542494648293E-4	0.017271185406352002E0	1.6831828745285906E0	1.6831828745285906E0	132.8724539263247E0	78.94118692452734E0	0.132210747970011E0	0.8620384897188644E0	0.7737190714039595E0	-1.292458770837121E0	61.07830184277169E0	78.94118692452734E0
chr4:63939001-63942541	.	.	Intergenic	5.910523401374325E-7	0.009616804985393324E0	2.346608685296013E0	2.346608685296013E0	114.73876403507522E0	48.89556778428164E0	5.279339173926208E-11	5.994717417988862E-8	29.516651641339926E0	29.516651641339926E0	114.73876403507522E0	3.8872554187134276E0	1.5516876541926505E-6	3.458371948775285E-4	12.578429384623432E0	12.578429384623432E0	48.89556778428164E0	3.8872554187134276E0
chr6:99262209-99266056	Foxp1	ENSMUST00000177227.7	5' UTR Exon	6.240452652448088E-7	0.009616804985393324E0	5.900738489952495E0	5.900738489952495E0	54.40106969046651E0	9.219366318825708E0	0.003733339905900338E0	0.12093891161236851E0	0.6074504911160737E0	-1.646224695880469E0	54.40106969046651E0	89.55638440676042E0	4.9467920715666675E-11	6.133624150989783E-8	0.10294482498256996E0	-9.713941426092223E0	9.219366318825708E0	89.55638440676042E0
chr2:174735377-174739793	.	.	Intergenic	1.1040148301327414E-6	0.014147146615551479E0	5.2768252805409634E0	5.2768252805409634E0	53.86137653886591E0	10.207155567095867E0	3.101806974790907E-6	5.739300579616115E-4	24.016872901100097E0	24.016872901100097E0	53.86137653886591E0	2.2426473571585905E0	0.03989241931147825E0	0.5310223564068601E0	4.551386794947656E0	4.551386794947656E0	10.207155567095867E0	2.2426473571585905E0
chr6:99026906-99029054	Foxp1	ENSMUST00000177229.7	TSS	1.1803168498137932E-6	0.014147146615551479E0	2.6445095947390476E0	2.6445095947390476E0	90.99226536722112E0	34.40799214653634E0	1.1021358069253901E-5	0.001566412330704382E0	2.3140833602904354E0	2.3140833602904354E0	90.99226536722112E0	39.321083643158346E0	0.567486429455736E0	0.8802935339883478E0	0.8750519812422092E0	-1.142789253022908E0	34.40799214653634E0	39.321083643158346E0
chr9:61777756-61781091	.	.	Intergenic	1.5794069756287096E-6	0.01703753686819958E0	2.381653288186641E0	2.381653288186641E0	103.51314648311417E0	43.462726920225954E0	7.221426514875309E-12	1.1289810759987598E-8	15.735230310941404E0	15.735230310941404E0	103.51314648311417E0	6.578432246469052E0	6.3935385029992015E-6	0.00108075375838734E0	6.6068517987024045E0	6.6068517987024045E0	43.462726920225954E0	6.578432246469052E0
chr10:95911852-95915793	.	.	Intergenic	2.7292697393325874E-6	0.02676495587191129E0	1.9102527899780792E0	1.9102527899780792E0	152.84110053226647E0	80.01092909489762E0	3.4796235202845446E-10	2.932479906278552E-7	68.1520882203765E0	68.1520882203765E0	152.84110053226647E0	2.2426473571585905E0	1.2979694309813833E-7	4.545969364553726E-5	35.67699970282915E0	35.67699970282915E0	80.01092909489762E0	2.2426473571585905E0
chr6:99373759-99375829	Foxp1	ENSMUST00000177227.7	5' UTR Exon	3.6051323883112225E-6	0.03202932217441766E0	7.983352074234068E0	7.983352074234068E0	44.68659296151037E0	5.597472408330138E0	0.015529584530363521E0	0.2967622448262009E0	0.6299295300130023E0	-1.5874791581518E0	44.68659296151037E0	70.93903497521063E0	7.301545575691607E-9	4.0185695198294935E-6	0.07890539264152878E0	-12.673405030034525E0	5.597472408330138E0	70.93903497521063E0
chr11:79675658-79678101	Rab11fip4os2	ENSMUST00000132921.1	TSS	3.85992035326198E-6	0.03202932217441766E0	2.364508328779858E0	2.364508328779858E0	96.9288900342734E0	40.99325380016361E0	1.5997795077077433E-9	1.0211420996151325E-6	29.468689922269263E0	29.468689922269263E0	96.9288900342734E0	3.2892161236195636E0	1.0730782339484855E-5	0.0016077245601489579E0	12.462924982580123E0	12.462924982580123E0	40.99325380016361E0	3.2892161236195636E0
chr11:55022069-55024416	Anxa6	ENSMUST00000108883.9	5' UTR Exon	4.419307186078083E-6	0.034051708863128645E0	2.5366173555121865E0	2.5366173555121865E0	86.0270883729286E0	33.91409752282416E0	0.8952842849794832E0	0.9856468500933814E0	0.9802286538589297E0	-1.0201701368994216E0	86.0270883729286E0	87.76226652246922E0	2.5730457698455173E-6	5.227159441253211E-4	0.38643142282727333E0	-2.587781274834316E0	33.91409752282416E0	87.76226652246922E0
chr1:131018029-131020959	Il10	ENSMUST00000016673.5	TSS	5.017273682543627E-6	0.036081890930468576E0	6.104714635249148E0	6.104714635249148E0	45.2262861131278E0	7.408419363615676E0	9.402109517297994E-6	0.0013950945804119483E0	18.906067909508955E0	18.906067909508955E0	45.2262861131278E0	2.3921571809429967E0	0.12848887220514105E0	0.8620384897188644E0	3.096961781037838E0	3.096961781037838E0	7.408419363615676E0	2.3921571809429967E0
chr16:49964941-49968135	.	.	Intergenic	5.76073063903824E-6	0.03858957765113E0	2.294731635347522E0	2.294731635347522E0	98.22415359798563E0	42.804200754878366E0	1.1392684889031898E-11	1.683511091828134E-8	13.139491588514604E0	13.139491588514604E0	98.22415359798563E0	7.4754911890079985E0	1.0729953499598418E-5	0.0016077245601489579E0	5.725938225680458E0	5.725938225680458E0	42.804200754878366E0	7.4754911890079985E0
chr2:174759857-174763670	Edn3	ENSMUST00000029030.8	TSS	6.751405864675904E-6	0.03858957765113E0	6.572767040077354E0	6.572767040077354E0	43.28339076730007E0	6.585261656678261E0	5.028350756736084E-6	8.48862724853508E-4	10.339356607550231E0	10.339356607550231E0	43.28339076730007E0	4.186275066254386E0	0.468613923718019E0	0.8659354711340131E0	1.5730599524532287E0	1.5730599524532287E0	6.585261656678261E0	4.186275066254386E0
chr5:121170272-121182402	Gm42930	ENSMUST00000200872.1	TTS	6.902519854092444E-6	0.03858957765113E0	1.5041726752739581E0	1.5041726752739581E0	303.84724431384484E0	202.00290120182157E0	3.3263943822799817E-31	3.5882814119968846E-26	17.222792335620387E0	17.222792335620387E0	303.84724431384484E0	17.642159203500604E0	9.425282195370745E-23	2.0334669325224567E-18	11.45001010770493E0	11.45001010770493E0	202.00290120182157E0	17.642159203500604E0
chr9:15529797-15536585	Smco4	ENSMUST00000045620.9	5' UTR Exon	6.9089115725961326E-6	0.03858957765113E0	0.5829162333934791E0	-1.7155123544569084E0	109.88152567127018E0	188.50311481563787E0	1.2323943120884347E-12	2.890045035389472E-9	6.024140893023527E0	6.024140893023527E0	109.88152567127018E0	18.24019849843194E0	1.6959162756183847E-21	2.613479662854029E-17	10.334488126970935E0	10.334488126970935E0	188.50311481563787E0	18.24019849843194E0
chr13:41674758-41677574	.	.	Intergenic	7.154631400096409E-6	0.03858957765113E0	5.56622950531616E0	5.56622950531616E0	44.902470222157504E0	8.066945529154399E0	1.4547750474621668E-5	0.00195674499619559E0	21.452231163142358E0	21.452231163142358E0	44.902470222157504E0	2.093137533372548E0	0.08200055783472089E0	0.7407824796885654E0	3.853996882926565E0	3.853996882926565E0	8.066945529154399E0	2.093137533372548E0
chr5:121185722-121188583	Gm42930	ENSMUST00000200872.1	TSS	7.733855586674148E-6	0.03972734303339526E0	2.4628635906930136E0	2.4628635906930136E0	85.27151796072712E0	34.622915488686466E0	8.771461683854431E-10	6.065409527066852E-7	17.8231427788326E0	17.8231427788326E0	85.27151796072712E0	4.784314361325692E0	4.9580989116466016E-5	0.005321840834786606E0	7.236755964148802E0	7.236755964148802E0	34.622915488686466E0	4.784314361325692E0
chr9:61717935-61724105	.	.	Intergenic	1.129666096632653E-5	0.05539112311002463E0	1.6888220620368595E0	1.6888220620368595E0	188.78466442189247E0	111.78481656865759E0	3.1997777219853944E-20	4.930994602910435E-16	16.398580553341034E0	16.398580553341034E0	188.78466442189247E0	11.512256430232899E0	2.0904945475520894E-13	6.632585833179016E-10	9.710070067158519E0	9.710070067158519E0	111.78481656865759E0	11.512256430232899E0
chr14:27233579-27237045	Arhgef3	ENSMUST00000049206.5	TSS	1.211507258781009E-5	0.056821270663688604E0	2.4174694817466493E0	2.4174694817466493E0	83.97625439700491E0	34.73725522951839E0	0.09874511745303868E0	0.7489756753629336E0	1.3154032040343224E0	1.3154032040343224E0	83.97625439700491E0	63.84069473105354E0	0.003896189670211159E0	0.130688329693622E0	0.5441240164421554E0	-1.8378163245553192E0	34.73725522951839E0	63.84069473105354E0
chr11:117091820-117094537	.	.	Intergenic	1.7634242941764898E-5	0.0792607787023752E0	0.41686415462988075E0	-2.3988630082331386E0	34.10860718956864E0	81.8218760494111E0	5.3673017957215006E-5	0.005410659645721133E0	7.604540920062393E0	7.604540920062393E0	34.10860718956864E0	4.485294713791715E0	2.134698449472348E-9	1.3990309466737943E-6	18.242251907732868E0	18.242251907732868E0	81.8218760494111E0	4.485294713791715E0
chr9:61819001-61822157	.	.	Intergenic	2.1890720322871675E-5	0.09445670693556546E0	2.324533344892421E0	2.324533344892421E0	84.19213165760782E0	36.218939101303455E0	3.07307904591739E-9	1.7822701931196055E-6	21.658502616602686E0	21.658502616602686E0	84.19213165760782E0	3.8872554187134307E0	2.895662580916157E-5	0.0035335272578186495E0	9.317355100193256E0	9.317355100193256E0	36.218939101303455E0	3.8872554187134307E0
chr9:61755271-61758121	.	.	Intergenic	2.5115459138520175E-5	0.10420307398652258E0	2.070471778604995E0	2.070471778604995E0	102.94121799721576E0	49.71872549094759E0	2.4191839167105374E-8	9.998644699130874E-6	49.18034116532839E0	49.18034116532839E0	102.94121799721576E0	2.093137533372546E0	7.149492679263463E-6	0.0011720930452738412E0	23.753205271150442E0	23.753205271150442E0	49.71872549094759E0	2.093137533372546E0
chr1:131020959-131022773	Il10	ENSMUST00000016673.5	CDS Exon 2	2.908805196127477E-5	0.1161214368667109E0	3.1998933453720735E0	3.1998933453720735E0	54.26074749463494E0	16.95704876323797E0	2.2746860738933696E-5	0.0027789038601257017E0	40.324921731816445E0	40.324921731816445E0	54.26074749463494E0	1.3455884144177546E0	0.004668076748144849E0	0.14750738187844112E0	12.601958059051364E0	12.601958059051364E0	16.95704876323797E0	1.3455884144177546E0
chr2:132689496-132692226	1110034G24Rik	ENSMUST00000110132.2	TSS	3.0966754310737476E-5	0.1161214368667109E0	4.303882349554733E0	4.303882349554733E0	43.221841899270075E0	10.042524025718704E0	0.5652239139890106E0	0.8680136059037894E0	0.8867801045050582E0	-1.1276752770159786E0	43.221841899270075E0	48.74020253690021E0	5.1616673484444625E-6	9.098113429391332E-4	0.20604190181843648E0	-4.853381720778316E0	10.042524025718704E0	48.74020253690021E0
chr7:110252465-110255233	Swap70	ENSMUST00000210513.1	Intron 2	3.121746562285851E-5	0.1161214368667109E0	0.12274494076421795E0	-8.146975295062552E0	4.425483845742384E0	36.05430755996162E0	0.8311985746939758E0	0.965352639348457E0	0.8705868703555663E0	-1.1486504495428225E0	4.425483845742384E0	5.083334008856488E0	3.5516714066448105E-5	0.0041419399962053585E0	7.092649724992623E0	7.092649724992623E0	36.05430755996162E0	5.083334008856488E0
chr3:37257024-37261619	Gm24169	ENSMUST00000180244.1	TSS	3.4740857220623616E-5	0.12449317953178553E0	1.696033885233832E0	1.696033885233832E0	165.57785890771748E0	97.62650401580235E0	4.966344871341544E-16	3.3483407519139153E-12	25.169805312898177E0	25.169805312898177E0	165.57785890771748E0	6.578432246469054E0	2.1480257442673498E-11	3.174164124813039E-8	14.84039059126936E0	14.84039059126936E0	97.62650401580235E0	6.578432246469054E0
chr6:99171541-99173581	Foxp1	ENSMUST00000177227.7	5' UTR Exon	3.5776223572954784E-5	0.12449317953178553E0	2.4944373441357155E0	2.4944373441357155E0	71.45537328061587E0	28.645888199438456E0	4.221580272648803E-5	0.004567648232211076E0	2.4635616387378683E0	2.4635616387378683E0	71.45537328061587E0	29.00490580670995E0	0.9622873140167957E0	0.9998571342969699E0	0.9876221764116729E0	-1.0125329542855137E0	28.645888199438456E0	29.00490580670995E0
chr4:141951051-141953048	Fhad1	ENSMUST00000129192.7	TSS	4.464576519316464E-5	0.1505022696463203E0	2.35297355501643E0	2.35297355501643E0	76.31261164476471E0	32.43241365040835E0	1.9315146150415722E-7	5.690472843450298E-5	34.02791410837414E0	34.02791410837414E0	76.31261164476471E0	2.2426473571585888E0	1.0927894173101097E-4	0.009872903920728095E0	14.461664490800679E0	14.461664490800679E0	32.43241365040835E0	2.2426473571585888E0
chr9:123933556-123935680	.	.	Intergenic	5.384134850280508E-5	0.17600084203160885E0	7.1894055162539985E0	7.1894055162539985E0	34.32448445022557E0	4.774314701351018E0	4.7015729038230694E-5	0.00492400751314666E0	9.565838656986278E0	9.565838656986278E0	34.32448445022557E0	3.5882357711686006E0	0.6827160284300225E0	0.9156102341385708E0	1.3305465431543089E0	1.3305465431543089E0	4.774314701351018E0	3.5882357711686006E0
chr19:40659670-40661213	Entpd1	ENSMUST00000156598.1	TSS	6.018284533166233E-5	0.18741668285697538E0	3.085353459136527E0	3.085353459136527E0	51.810542562775744E0	16.792417221874977E0	5.79747164614939E-7	1.4066342967221815E-4	9.90102976889859E0	9.90102976889859E0	51.810542562775744E0	5.232843832620781E0	0.019865649955480433E0	0.36328564258197704E0	3.209042302618226E0	3.209042302618226E0	16.792417221874977E0	5.232843832620781E0
chr4:145283277-145285650	Tnfrsf8	ENSMUST00000123027.1	CDS Exon 11	6.0808394130080173E-5	0.18741668285697538E0	2.1387533329702886E0	2.1387533329702886E0	87.32235193664725E0	40.828622258825185E0	8.712066820667321E-10	6.063205059005457E-7	19.468587352385562E0	19.468587352385562E0	87.32235193664725E0	4.485294713791717E0	9.008900376450039E-6	0.0013922881236515688E0	9.102773588830697E0	9.102773588830697E0	40.828622258825185E0	4.485294713791717E0
chr14:20172383-20174900	Kcnk5	ENSMUST00000024011.9	Intron 1	6.530942843453552E-5	0.19569788815329586E0	2.405232356131666E0	2.405232356131666E0	70.48392560777918E0	29.304414364830205E0	2.6769614039856365E-8	1.0938327936823582E-5	18.132054114187174E0	18.132054114187174E0	70.48392560777918E0	3.8872554187134276E0	1.8248451504714E-4	0.014733478760712602E0	7.538587308607867E0	7.538587308607867E0	29.304414364830205E0	3.8872554187134276E0
chr1:53048544-53051143	.	.	Intergenic	7.158951397684857E-5	0.20871826057363746E0	2.081152716940413E0	2.081152716940413E0	90.45257221566757E0	43.46272692022601E0	4.5289836198268295E-8	1.6905019031888565E-5	40.33294486845676E0	40.33294486845676E0	90.45257221566757E0	2.2426473571585874E0	1.5005411239595999E-5	0.0020678034535291274E0	19.380098606003237E0	19.380098606003237E0	43.46272692022601E0	2.2426473571585874E0
chr13:41672541-41674508	.	.	Intergenic	7.952713757567733E-5	0.22575870820265895E0	5.2451008800620915E0	5.2451008800620915E0	35.40387075350671E0	6.749893198067068E0	1.505387980332143E-4	0.011853337051267829E0	23.679962860409795E0	23.679962860409795E0	35.40387075350671E0	1.4950982382112579E0	0.0953933965237681E0	0.7868207456601425E0	4.514682062726975E0	4.514682062726975E0	6.749893198067068E0	1.4950982382112579E0
chr1:131002625-131004169	.	.	Intergenic	9.148767889225643E-5	0.25305257397806097E0	3.3413820368000127E0	3.3413820368000127E0	45.65804063442089E0	13.664417935922962E0	3.8962136647650644E-5	0.00427885565188244E0	30.538488687570357E0	30.538488687570357E0	45.65804063442089E0	1.4950982382112585E0	0.0102132892436552E0	0.243370477265479E0	9.139478321017304E0	9.139478321017304E0	13.664417935922962E0	1.4950982382112585E0
chr13:41658037-41660675	.	.	Intergenic	9.955579966620262E-5	0.26282153521462037E0	5.546339781905247E0	5.546339781905247E0	33.784791298582924E0	6.091367032507584E0	2.4594911872036153E-4	0.01713906284478137E0	25.107819699236835E0	25.107819699236835E0	33.784791298582924E0	1.3455884144177535E0	0.11290649884401123E0	0.8304730666914814E0	4.526916973451623E0	4.526916973451623E0	6.091367032507584E0	1.3455884144177535E0
chr2:174723910-174726342	.	.	Intergenic	9.989230802702655E-5	0.26282153521462037E0	5.139210190196498E0	5.139210190196498E0	34.68911990624432E0	6.749893198067071E0	0.001849954922806323E0	0.0742135319404561E0	58.00475014681218E0	58.00475014681218E0	34.68911990624432E0	0.5980392953757213E0	0.07243841161240651E0	0.700067082589601E0	11.286705155095897E0	11.286705155095897E0	6.749893198067071E0	0.5980392953757213E0
chr12:73711318-73720248	Prkch	ENSMUST00000221153.1	3' UTR Exon	1.0425771243682937E-4	0.26777600508804983E0	0.7167197977126805E0	-1.3952453988174627E0	233.0395028429793E0	325.14729408437586E0	0.06172981518136177E0	0.6215214068563598E0	1.1989924915922343E0	1.1989924915922343E0	233.0395028429793E0	194.3627708072702E0	1.389329335771337E-8	6.9065033842240295E-6	1.6728887571107502E0	1.6728887571107502E0	325.14729408437586E0	194.3627708072702E0
chr18:80615593-80620498	Nfatc1	ENSMUST00000078049.10	3' UTR Exon	1.1176763423280216E-4	0.27527158809902985E0	1.6498144337669112E0	1.6498144337669112E0	157.80627752610673E0	95.6509255200285E0	5.029984970036296E-17	4.173842835944041E-13	17.024048831591763E0	17.024048831591763E0	157.80627752610673E0	9.269609074033166E0	1.1686375980049125E-11	1.8538888766115283E-8	10.318765846121185E0	10.318765846121185E0	95.6509255200285E0	9.269609074033166E0
chr14:119137361-119139327	Hs6st3	ENSMUST00000065904.4	TSS	1.1227971667013352E-4	0.27527158809902985E0	5.0851892678916695E0	5.0851892678916695E0	34.324484450225626E0	6.749893198067067E0	6.800824774964933E-5	0.006435310271489405E0	14.348757984496144E0	14.348757984496144E0	34.324484450225626E0	2.392157180942998E0	0.16802051797948156E0	0.8620384897188644E0	2.821676289434389E0	2.821676289434389E0	6.749893198067067E0	2.392157180942998E0
chr2:127322469-127325139	.	.	Intergenic	1.258040814754825E-4	0.3015747484667716E0	2.164502247061486E0	2.164502247061486E0	78.03962972978283E0	36.05430755996162E0	3.463356415726043E-5	0.0038916942357668277E0	2.3618548111106548E0	2.3618548111106548E0	78.03962972978283E0	33.0416710471229E0	0.7171197419254056E0	0.9277191092009268E0	1.0911768811130103E0	1.0911768811130103E0	36.05430755996162E0	33.0416710471229E0
chr15:58684030-58686223	.	.	Intergenic	1.3838201728066745E-4	0.32451485543733566E0	2.326217057296085E0	2.326217057296085E0	67.78545984988845E0	29.139782823482495E0	5.8115876406322865E-8	2.1038165575087008E-5	18.891027282695102E0	18.891027282695102E0	67.78545984988845E0	3.5882357711685957E0	1.8148488496683323E-4	0.014697686933954356E0	8.120922002288724E0	8.120922002288724E0	29.139782823482495E0	3.5882357711685957E0
chr11:99170497-99172000	.	.	Intergenic	1.6956001970419959E-4	0.38646258997096644E0	2.835221424030543E0	2.835221424030543E0	49.94405543442961E0	17.615574928687323E0	0.005446487572602329E0	0.15527261091549174E0	0.60736727031021E0	-1.6464502598061543E0	49.94405543442961E0	82.2304030457896E0	4.410624764818956E-9	2.6286592555542277E-6	0.21422216450621284E0	-4.668051050203062E0	17.615574928687323E0	82.2304030457896E0
chr17:44734034-44736908	Runx2	ENSMUST00000162130.7	TSS	1.719633672801015E-4	0.38646258997096644E0	1.7963698735662614E0	1.7963698735662614E0	115.04252589824468E0	64.04166958659542E0	2.1317046743899722E-13	6.051404693170249E-10	13.266632089661577E0	13.266632089661577E0	115.04252589824468E0	8.67156977903194E0	3.2889203669529894E-8	1.4191428269772793E-5	7.385245257606032E0	7.385245257606032E0	64.04166958659542E0	8.67156977903194E0
chr13:30167329-30170055	Mboat1	ENSMUST00000220870.1	Intron 1	1.8014731641191088E-4	0.38843787235834293E0	5.043366230862352E0	5.043366230862352E0	32.38158910430514E0	6.420630115288752E0	0.8913575915978071E0	0.9856468500933814E0	0.9668974387488528E0	-1.0342358557635454E0	32.38158910430514E0	33.49020051827453E0	1.2619407650001473E-4	0.011058435105025254E0	0.19171668177338086E0	-5.216030189704891E0	6.420630115288752E0	33.49020051827453E0
chr17:84855134-84856782	.	.	Intergenic	1.843974508744872E-4	0.38843787235834293E0	0.3461849693432092E0	-2.8886291680924945E0	16.730487705756666E0	48.32817478326158E0	2.3326284694794157E-5	0.0028389282328104234E0	0.3065815441084174E0	-3.26177494769994E0	16.730487705756666E0	54.571085661438936E0	0.5385197959249677E0	0.875173998899523E0	0.8856003907104101E0	-1.1291774602739515E0	48.32817478326158E0	54.571085661438936E0
chr6:65537355-65539295	Tnip3	ENSMUST00000212402.1	CDS Exon 2	1.8681831493006922E-4	0.38843787235834293E0	2.441621298014601E0	2.441621298014601E0	60.29518166383359E0	24.694731207031364E0	3.933469649728524E-5	0.004309624577134141E0	57.61225021619407E0	57.61225021619407E0	60.29518166383359E0	1.0465687668433643E0	0.0015383898925306816E0	0.06941724866511176E0	23.59589927522395E0	23.59589927522395E0	24.694731207031364E0	1.0465687668433643E0
chr7:127921959-127923413	Kat8	ENSMUST00000033070.8	CDS Exon 6	1.872458294720072E-4	0.38843787235834293E0	0.3266267367751816E0	-3.0615987223614938E0	14.787592359589993E0	45.273673874923304E0	0.009713655432778362E0	0.2237542499466368E0	0.44552775681993034E0	-2.244529066242155E0	14.787592359589993E0	33.19118087084015E0	0.17429150705790156E0	0.8620384897188644E0	1.3640272110564808E0	1.3640272110564808E0	45.273673874923304E0	33.19118087084015E0
chr3:89860887-89863229	.	.	Intergenic	2.0296597513034682E-4	0.41236168307058546E0	2.2971593299483044E0	2.2971593299483044E0	65.80416934199592E0	28.64588819943838E0	0.04044148551892866E0	0.5052433895426849E0	1.489745546232718E0	1.489745546232718E0	65.80416934199592E0	44.17141538593761E0	0.07103649394559293E0	0.6961296123303858E0	0.6485164206116445E0	-1.5419810018948414E0	28.64588819943838E0	44.17141538593761E0
chr5:139283666-139286233	Adap1	ENSMUST00000156815.1	Intron 3	2.0708381566629795E-4	0.41236168307058546E0	0.15383675774713654E0	-6.50039700943069E0	4.5334224761079245E0	29.46904590617783E0	0.4979704077664605E0	0.8602291146233343E0	1.6845502042400249E0	1.6845502042400249E0	4.5334224761079245E0	2.6911768285072584E0	1.711002651023961E-4	0.014003868662663715E0	10.950245109877715E0	10.950245109877715E0	29.46904590617783E0	2.6911768285072584E0
chr4:135152747-135154293	Runx3	ENSMUST00000127109.1	TSS	2.1024623927101498E-4	0.41236168307058546E0	2.622550440338027E0	2.622550440338027E0	53.53756064790531E0	20.414311131802187E0	0.9363750613230469E0	0.9998888456104917E0	0.9847475527182217E0	-1.0154886876739897E0	53.53756064790531E0	54.366787203608E0	1.610322795422291E-4	0.013382923798966778E0	0.3754923213569517E0	-2.663170305017707E0	20.414311131802187E0	54.366787203608E0
chr9:15512675-15517722	Smco4	ENSMUST00000045620.9	5' UTR Exon	2.1585817656088763E-4	0.415808376431297E0	0.4968503765317485E0	-2.0126783579806755E0	41.880188573081966E0	84.29134916919168E0	1.130153031281368E-5	0.0015978112443435781E0	6.089492041335118E0	6.089492041335118E0	41.880188573081966E0	6.877451893984207E0	2.638613399293867E-10	2.314106855463637E-7	12.25618884269076E0	12.25618884269076E0	84.29134916919168E0	6.877451893984207E0
chr14:121107394-121108650	Farp1	ENSMUST00000026635.7	Intron 2	2.3813579108314593E-4	0.44663850328292903E0	3.346964842987918E0	3.346964842987918E0	40.224166621284375E0	12.0181025222169E0	7.728943659061968E-5	0.007083639246677925E0	26.9040291756405E0	26.9040291756405E0	40.224166621284375E0	1.4950982382112572E0	0.01624717072309699E0	0.32208109898040116E0	8.03833635480396E0	8.03833635480396E0	12.0181025222169E0	1.4950982382112572E0
chr11:68198360-68201312	Stx8	ENSMUST00000129992.7	Intron 6	2.4014380976157041E-4	0.44663850328292903E0	0.5226599644425377E0	-1.9132898404923495E0	48.7882609137758E0	93.34608394161722E0	0.02917315014254796E0	0.42636434430660836E0	1.6649053039023727E0	1.6649053039023727E0	48.7882609137758E0	29.303925454151035E0	4.472632358732228E-8	1.8275616304300065E-5	3.185446403338237E0	3.185446403338237E0	93.34608394161722E0	29.303925454151035E0
chr6:124910408-124912538	Lag3	ENSMUST00000139571.1	TSS	2.735942404920594E-4	0.5002276526203377E0	2.0639219809808647E0	2.0639219809808647E0	77.28405931758806E0	37.445242615643515E0	2.7966431828522028E-9	1.6575950003506357E-6	15.20341948471984E0	15.20341948471984E0	77.28405931758806E0	5.083334008856508E0	2.3951894065840417E-5	0.003043301140829686E0	7.366276256961283E0	7.366276256961283E0	37.445242615643515E0	5.083334008856508E0
chr12:119237238-119239455	Itgb8	ENSMUST00000151023.7	TSS	2.835870795040717E-4	0.5098564837890455E0	0.4839899955653061E0	-2.066158410634063E0	37.130888838745015E0	76.71829826849145E0	6.102590832132483E-5	0.005910267988773033E0	19.10391000068478E0	19.10391000068478E0	37.130888838745015E0	1.9436277095847945E0	4.1872260131062365E-7	1.1671540871106178E-4	39.47170432391104E0	39.47170432391104E0	76.71829826849145E0	1.9436277095847945E0
chr2:73344829-73347717	Gpr155	ENSMUST00000131430.1	TTS	3.033638662398789E-4	0.5306758988193248E0	1.8039294696685322E0	1.8039294696685322E0	105.13222593773591E0	58.27956564014319E0	5.078072165266522E-7	1.2592801808822886E-4	78.13104275517082E0	78.13104275517082E0	105.13222593773591E0	1.3455884144177521E0	1.5494676509958558E-5	0.0021157686571629864E0	43.311583999748734E0	43.311583999748734E0	58.27956564014319E0	1.3455884144177521E0
chr6:99260857-99262209	Foxp1	ENSMUST00000177235.7	TTS	3.0899698977547693E-4	0.5306758988193248E0	2.514264897782535E0	2.514264897782535E0	53.81054972411251E0	21.40210037994442E0	0.06735927494717592E0	0.6444565025611271E0	1.4811240219370965E0	1.4811240219370965E0	53.81054972411251E0	36.330887168878725E0	0.0521357235042208E0	0.6070196331970653E0	0.589088295049332E0	-1.6975383968820108E0	21.40210037994442E0	36.330887168878725E0
chr2:26492127-26496616	Notch1	ENSMUST00000132820.1	Intron 2	3.099253902794718E-4	0.5306758988193248E0	1.6441962635513354E0	1.6441962635513354E0	139.13289448391544E0	84.62061225184837E0	0.10386963367233332E0	0.7633148005946541E0	1.2285517240296202E0	1.2285517240296202E0	139.13289448391544E0	113.24952117405597E0	0.04255755708331265E0	0.549595774056045E0	0.7472050334040077E0	-1.3383207490510949E0	84.62061225184837E0	113.24952117405597E0
chr9:13296286-13301468	Maml2	ENSMUST00000159294.8	TSS	3.2096202329358255E-4	0.5409865052929473E0	1.7483669603439849E0	1.7483669603439849E0	113.98319362293824E0	65.19409037591997E0	0.8776956710687799E0	0.9791173137798994E0	0.979921969798163E0	-1.0204894173420487E0	113.98319362293824E0	116.31864284705816E0	1.8251581643273832E-4	0.014733478760712602E0	0.5604784304579669E0	-1.7841899806615218E0	65.19409037591997E0	116.31864284705816E0
chr12:55488537-55493740	Nfkbia	ENSMUST00000219869.1	TSS	3.9726263371235864E-4	0.6536589736520972E0	1.4387808480935267E0	1.4387808480935267E0	231.18385964733048E0	160.6803843362687E0	0.5814726836373758E0	0.8686979309477694E0	1.0533233825604256E0	1.0533233825604256E0	231.18385964733048E0	219.4804211840121E0	0.0026691106689232624E0	0.10119481379803995E0	0.7320943866858833E0	-1.3659440888857215E0	160.6803843362687E0	219.4804211840121E0
chr2:33166925-33174821	Ralgps1	ENSMUST00000091039.4	CDS Exon 11	4.07937052222346E-4	0.6536589736520972E0	1.4277117910449633E0	1.4277117910449633E0	239.2772277995678E0	167.59490907085478E0	2.1196336955937756E-22	5.7162811411196834E-18	25.403355706222314E0	25.403355706222314E0	239.2772277995678E0	9.419118897782434E0	8.301742292418956E-18	7.462782052584251E-14	17.793055899348722E0	17.793055899348722E0	167.59490907085478E0	9.419118897782434E0
chr13:45881855-45883923	Atxn1	ENSMUST00000180110.8	5' UTR Exon	4.10201092765352E-4	0.6536589736520972E0	5.765089329286565E0	5.765089329286565E0	27.524350739414714E0	4.774314701351015E0	3.309850845556435E-4	0.02157362781043561E0	6.574902581363764E0	6.574902581363764E0	27.524350739414714E0	4.186275066254384E0	0.8443738392905187E0	0.9677799761370617E0	1.1404684655905262E0	1.1404684655905262E0	4.774314701351015E0	4.186275066254384E0
chr9:123929250-123931417	.	.	Intergenic	4.1956624995300465E-4	0.6536589736520972E0	6.921225160633907E0	6.921225160633907E0	26.337025805753708E0	3.8052548782189213E0	0.30874559800010715E0	0.8565483502551655E0	0.7681766332495641E0	-1.3017839344706044E0	26.337025805753708E0	34.2851170756679E0	4.7361879616923715E-5	0.005171121497891105E0	0.11098853388251968E0	-9.009939720966948E0	3.8052548782189213E0	34.2851170756679E0
chr11:46371035-46375672	Itk	ENSMUST00000101306.3	Intron 1	4.28845265248627E-4	0.6536589736520972E0	1.6464985568710009E0	1.6464985568710009E0	132.00894488389486E0	80.17556063624139E0	0.9048403328863294E0	0.9895617959489363E0	1.014879261064974E0	1.014879261064974E0	132.00894488389486E0	130.07354662599954E0	6.548965894727459E-4	0.03790946494741899E0	0.6163863653750455E0	-1.622359052980579E0	80.17556063624139E0	130.07354662599954E0
chr16:49935521-49937570	.	.	Intergenic	4.3503956306315987E-4	0.6536589736520972E0	2.070897976731118E0	2.070897976731118E0	71.7150347292995E0	34.629921674123516E0	2.1798101904401407E-8	9.149520026200361E-6	18.44875805795009E0	18.44875805795009E0	71.7150347292995E0	3.8872554187134276E0	4.343732731106865E-5	0.004860700009364013E0	8.90857891853812E0	8.90857891853812E0	34.629921674123516E0	3.8872554187134276E0
chr5:32134822-32137015	Fosl2	ENSMUST00000201110.1	TSS	4.420235468653828E-4	0.6536589736520972E0	1.680440541288212E0	1.680440541288212E0	122.83416130801457E0	73.09640435944905E0	0.01988124538538344E0	0.342262225262907E0	1.3831299657205929E0	1.3831299657205929E0	122.83416130801457E0	88.8088352883162E0	0.21761655805886312E0	0.8620384897188644E0	0.8230758135960567E0	-1.214954908747656E0	73.09640435944905E0	88.8088352883162E0
chr16:45285557-45288788	.	.	Intergenic	4.4601578411346054E-4	0.6536589736520972E0	4.261644465199889E0	4.261644465199889E0	30.870448279686652E0	7.243787822229487E0	1.1322410620674369E-4	0.009556982792519611E0	9.38535113518653E0	9.38535113518653E0	30.870448279686652E0	3.289216123619558E0	0.2350670067827621E0	0.8620384897188644E0	2.202283933309373E0	2.202283933309373E0	7.243787822229487E0	3.289216123619558E0
chr2:33181695-33184575	Gm13528	ENSMUST00000139288.1	TTS	4.477911418483053E-4	0.6536589736520972E0	4.087272760433304E0	4.087272760433304E0	31.62601869199737E0	7.737682446386231E0	6.024100608368161E-4	0.0332232940311074E0	30.218767933794716E0	30.218767933794716E0	31.62601869199737E0	1.0465687668433654E0	0.05475227220347276E0	0.6200831348456926E0	7.393381774352426E0	7.393381774352426E0	7.737682446386231E0	1.0465687668433654E0
chr16:27398323-27402279	Ccdc50	ENSMUST00000039443.13	Intron 1	4.5396837041688034E-4	0.6536589736520972E0	3.444699189332984E0	3.444699189332984E0	35.72768664448993E0	10.371787108472617E0	6.621650061027492E-5	0.00629891761052221E0	17.068962777101454E0	17.068962777101454E0	35.72768664448993E0	2.0931375333725453E0	0.03467957145492315E0	0.49523291124661784E0	4.9551388492667225E0	4.9551388492667225E0	10.371787108472617E0	2.0931375333725453E0
chr1:171993414-171996189	.	.	Intergenic	4.5446425911866074E-4	0.6536589736520972E0	5.5510650980125655E0	5.5510650980125655E0	27.416412109082245E0	4.938946242748635E0	4.534740883540311E-4	0.027026304051389168E0	5.556827945334229E0	5.556827945334229E0	27.416412109082245E0	4.933824185091486E0	0.9986993402165651E0	0.9998571342969699E0	1.0010381516375526E0	1.0010381516375526E0	4.938946242748635E0	4.933824185091486E0
chr2:167937186-167946835	Ptpn1	ENSMUST00000029053.7	Intron 1	4.720342325310624E-4	0.6613755347650654E0	1.3988869717535424E0	1.3988869717535424E0	260.24003767667836E0	186.0336416961983E0	0.9182763940734737E0	0.9942876877828037E0	1.0090560354718743E0	1.0090560354718743E0	260.24003767667836E0	257.9044458665567E0	6.841585516219377E-4	0.039090167075801534E0	0.7213277811909246E0	-1.386332297293448E0	186.0336416961983E0	257.9044458665567E0
chr1:60901438-60905617	Rpl18-ps1	ENSMUST00000121555.1	TTS	4.7209140542035576E-4	0.6613755347650654E0	1.8643300750416147E0	1.8643300750416147E0	90.23669495504633E0	48.40167316028097E0	1.0166146607805584E-9	6.985049254928737E-7	22.353713811584285E0	22.353713811584285E0	90.23669495504633E0	4.036765242484374E0	1.629002388009733E-6	3.6083239137941255E-4	11.990212522364269E0	11.990212522364269E0	48.40167316028097E0	4.036765242484374E0
chr2:28523625-28525693	Ralgds	ENSMUST00000028170.14	Intron 1	5.092076057381773E-4	0.7042275904332616E0	0.40873610514934167E0	-2.44656634782637E0	21.263910180003965E0	52.02356706960027E0	0.01287168079861868E0	0.26553964864972135E0	2.9025340251148783E0	2.9025340251148783E0	21.263910180003965E0	7.325981365252855E0	6.792425408105078E-7	1.736301673100756E-4	7.101242069267082E0	7.101242069267082E0	52.02356706960027E0	7.325981365252855E0
chr4:102568355-102573325	Pde4b	ENSMUST00000097950.8	TSS	5.264083540985767E-4	0.7188006124262754E0	1.520622497839488E0	1.520622497839488E0	172.48593124687667E0	113.43113198176799E0	0.5353034541011622E0	0.863612532886662E0	0.9364255194721307E0	-1.0678905894872521E0	172.48593124687667E0	184.19610279748477E0	4.869635497403972E-5	0.005258280180294882E0	0.6158172201204515E0	-1.6238584556053886E0	113.43113198176799E0	184.19610279748477E0
chr7:98491844-98493895	Lrrc32	ENSMUST00000165205.1	TSS	5.608771306777374E-4	0.7562937339699946E0	0.03962644898971397E0	-25.23567025295592E0	1.187324934502572E0	29.962940530219395E0	0.341238310333147E0	0.8565483502551655E0	0.36097504386425133E0	-2.770274613155975E0	1.187324934502572E0	3.289216123619556E0	1.4273980386853642E-4	0.012210761984703116E0	9.109447176504545E0	9.109447176504545E0	29.962940530219395E0	3.289216123619556E0
chr6:54039435-54040334	Chn2	ENSMUST00000133315.3	TSS	6.279718963942216E-4	0.8363112639473317E0	2.9544163910620926E0	2.9544163910620926E0	39.3976000755997E0	13.335154853184566E0	1.4471699282984082E-5	0.0019489458386433732E0	11.457033994072587E0	11.457033994072587E0	39.3976000755997E0	3.438725947394626E0	0.025036447468506563E0	0.41245520735647884E0	3.877934751761197E0	3.877934751761197E0	13.335154853184566E0	3.438725947394626E0
chr6:99258186-99260379	Foxp1	ENSMUST00000177235.7	TTS	7.120979132555242E-4	0.9367821731294289E0	5.26695546705864E0	5.26695546705864E0	26.01320991475367E0	4.938946242748639E0	0.23130115300986634E0	0.8565483502551655E0	0.7341348992383308E0	-1.362147475944143E0	26.01320991475367E0	35.43382822658687E0	4.088153207965404E-5	0.004622655670889435E0	0.1393850591351805E0	-7.1743700953641305E0	4.938946242748639E0	35.43382822658687E0
chr1:131000329-131002263	.	.	Intergenic	7.567775572082153E-4	0.9835646437195398E0	4.51858352854564E0	4.51858352854564E0	27.52435073941469E0	6.0913670325075815E0	7.866434566510722E-4	0.040216656532482374E0	23.012159029626048E0	23.012159029626048E0	27.52435073941469E0	1.196078590625921E0	0.10360470334889574E0	0.8080498247426106E0	5.092781594995277E0	5.092781594995277E0	6.0913670325075815E0	1.196078590625921E0
chr2:127313027-127321709	.	.	Intergenic	8.144740429777079E-4	0.9999999999998793E0	1.3233289649590003E0	1.3233289649590003E0	331.803349558392E0	250.73383742391826E0	0.5641162006079834E0	0.8680136059037894E0	1.0463340731966777E0	1.0463340731966777E0	331.803349558392E0	317.1103360370292E0	0.005452213521693969E0	0.16283129269814328E0	0.790683269922302E0	-1.264728922490376E0	250.73383742391826E0	317.1103360370292E0
chr13:51752494-51757517	Sema4d	ENSMUST00000146922.7	TSS	8.256564212991029E-4	0.9999999999998793E0	0.6191661778505788E0	-1.6150752992863355E0	78.79520014200185E0	127.26018145167036E0	4.7214413734413985E-6	8.008113919453522E-4	0.5286093921778071E0	-1.8917560202252939E0	78.79520014200185E0	149.06129423348895E0	0.19015011989026614E0	0.8620384897188644E0	0.8537439722771397E0	-1.1713113444687175E0	127.26018145167036E0	149.06129423348895E0
chr6:99056452-99058118	Foxp1	ENSMUST00000175886.7	5' UTR Exon	8.289079535800839E-4	0.9999999999998793E0	2.7427200038339405E0	2.7427200038339405E0	41.08997818776981E0	14.98147026686346E0	0.015126887107567936E0	0.29261851376517967E0	1.9085506462702362E0	1.9085506462702362E0	41.08997818776981E0	21.529414620497203E0	0.28114893009413505E0	0.8620384897188644E0	0.6958605485074482E0	-1.4370695423744035E0	14.98147026686346E0	21.529414620497203E0
chr4:63859063-63863760	Tnfsf8	ENSMUST00000030047.2	TSS	8.342142458687768E-4	0.9999999999998793E0	1.4747498498824607E0	1.4747498498824607E0	183.0639170161214E0	124.13218216683445E0	5.543056704988404E-9	2.9601294848376936E-6	2.1481181550926447E0	2.1481181550926447E0	183.0639170161214E0	85.22059951968804E0	0.007507264730966469E0	0.20030451850693692E0	1.4565983209042892E0	1.4565983209042892E0	124.13218216683445E0	85.22059951968804E0
chr1:82830714-82835110	.	.	Intergenic	8.437514701603432E-4	0.9999999999998793E0	1.4627042114748336E0	1.4627042114748336E0	189.75611209456957E0	129.7296545712683E0	1.7499139761509898E-10	1.6705174367197853E-7	2.3287857868083344E0	2.3287857868083344E0	189.75611209456957E0	81.48285392734022E0	0.0010020521669474721E0	0.051205292944161374E0	1.592109852791247E0	1.592109852791247E0	129.7296545712683E0	81.48285392734022E0
chr5:121182574-121185152	Gm42930	ENSMUST00000200872.1	TSS	8.705776438569437E-4	0.9999999999998793E0	1.7613256009283715E0	1.7613256009283715E0	95.52568784024851E0	54.23511007271919E0	3.679902190615157E-9	2.067510880251192E-6	31.946291357391914E0	31.946291357391914E0	95.52568784024851E0	2.9901964760659214E0	1.070196037363826E-6	2.520638802151703E-4	18.13764095664847E0	18.13764095664847E0	54.23511007271919E0	2.9901964760659214E0
chr13:104620497-104623122	.	.	Intergenic	9.413486807986387E-4	0.9999999999998793E0	1.706481908306789E0	1.706481908306789E0	103.66713559107467E0	60.749038760062554E0	1.3680358039562919E-11	1.9165470945477542E-8	17.77897675553029E0	17.77897675553029E0	103.66713559107467E0	5.830883127670899E0	6.473180521434608E-8	2.4993454841623972E-5	10.418497066383203E0	10.418497066383203E0	60.749038760062554E0	5.830883127670899E0
chr11:120850244-120852985	Ccdc57	ENSMUST00000056781.4	Intron 18	9.544209689712332E-4	0.9999999999998793E0	0.43609989014569883E0	-2.293052629905284E0	22.75926768112917E0	52.188198610931565E0	0.010364555952581955E0	0.23254071220317662E0	0.5160200046292478E0	-1.9379093659721276E0	22.75926768112917E0	44.105398001926964E0	0.41067046315542377E0	0.8620384897188644E0	1.1832610286988332E0	1.1832610286988332E0	52.188198610931565E0	44.105398001926964E0
chr9:75433975-75435171	.	.	Intergenic	9.683711514026643E-4	0.9999999999998793E0	2.981566238530693E0	2.981566238530693E0	36.32362857699518E0	12.18273406358913E0	0.0020055890933864534E0	0.07847258334090565E0	2.6697961614926955E0	2.6697961614926955E0	36.32362857699518E0	13.605393962618656E0	0.7794719335144304E0	0.9477812603339452E0	0.8954341268662753E0	-1.1167767343195538E0	12.18273406358913E0	13.605393962618656E0
chr16:23609360-23610878	Rtp4	ENSMUST00000211349.1	TSS	0.0010028084772642767E0	0.9999999999998793E0	0.439832127273952E0	-2.2735947148698035E0	23.09886689572206E0	52.51746169359475E0	0.0016703410279043822E0	0.06943533630178397E0	0.4544038787232876E0	-2.2006854404712444E0	23.09886689572206E0	50.83334006879875E0	0.8684309710313998E0	0.9723517202739163E0	1.0331302570816059E0	1.0331302570816059E0	52.51746169359475E0	50.83334006879875E0
chr7:47090731-47091692	Ptpn5	ENSMUST00000208324.1	TSS	0.0010489978035598964E0	0.9999999999998793E0	0.1920909212942852E0	-5.20586810278238E0	4.703748715790662E0	24.487095403038193E0	0.1439875232571101E0	0.8441438993381263E0	15.730567377800119E0	15.730567377800119E0	4.703748715790662E0	0.29901964772287E0	0.01664886061959056E0	0.32707385569424374E0	81.89125895075868E0	81.89125895075868E0	24.487095403038193E0	0.29901964772287E0
chr15:73590217-73592916	Slc45a4	ENSMUST00000132607.1	5' UTR Exon	0.0010674897172785183E0	0.9999999999998793E0	0.38521898503824314E0	-2.595926054632857E0	16.298733184389757E0	42.310306130866515E0	0.02182180555084262E0	0.36136850721760244E0	3.2063077413353382E0	3.2063077413353382E0	16.298733184389757E0	5.083334008856488E0	6.362696556210008E-6	0.0010791873673082425E0	8.32333780490343E0	8.32333780490343E0	42.310306130866515E0	5.083334008856488E0
chr12:110559924-110561766	Ppp2r5c	ENSMUST00000221715.1	CDS Exon 9	0.0010962477103154179E0	0.9999999999998793E0	2.4051711707495396E0	2.4051711707495396E0	47.12007741956707E0	19.591153425010795E0	2.4086422795945416E-6	4.681576011291927E-4	12.606550184511503E0	12.606550184511503E0	47.12007741956707E0	3.737745594941519E0	0.0033365169384534806E0	0.11769787171412437E0	5.24143576050882E0	5.24143576050882E0	19.591153425010795E0	3.737745594941519E0
chr4:63935044-63936120	.	.	Intergenic	0.0011060733767199338E0	0.9999999999998793E0	3.0724621183344425E0	3.0724621183344425E0	34.39604386200705E0	11.194944815349873E0	4.322485507168248E-4	0.026092863968369358E0	32.86553636198369E0	32.86553636198369E0	34.39604386200705E0	1.046568766843365E0	0.020421226506768243E0	0.3694068538997067E0	10.696807672863951E0	10.696807672863951E0	11.194944815349873E0	1.046568766843365E0
chr8:70683287-70686219	.	.	Intergenic	0.0011828508571799312E0	0.9999999999998793E0	0.4864970565574953E0	-2.0555108947135383E0	30.114877867372805E0	61.9014595493524E0	1.5511230720068156E-4	0.012124949213521103E0	7.193716941853444E0	7.193716941853444E0	30.114877867372805E0	4.186275066254383E0	9.62458141440977E-8	3.4840015802571306E-5	14.786763547465108E0	14.786763547465108E0	61.9014595493524E0	4.186275066254383E0
chr13:36727839-36730065	AC156802.1	ENSMUST00000223623.1	TTS	0.0012166881368371658E0	0.9999999999998793E0	3.8026981382515275E0	3.8026981382515275E0	28.171982521407912E0	7.408419363615682E0	4.6807367004048257E-4	0.02764520208504783E0	18.842897276845832E0	18.842897276845832E0	28.171982521407912E0	1.4950982382112579E0	0.07425476646543078E0	0.7086061945263149E0	4.955138849256585E0	4.955138849256585E0	7.408419363615682E0	1.4950982382112579E0
chr7:128373559-128377489	Rgs10	ENSMUST00000129144.1	TSS	0.0012260324070571375E0	0.9999999999998793E0	0.5726603012912924E0	-1.7462359408275705E0	52.88992886606685E0	92.35829469373954E0	8.107096188602562E-7	1.857012566004328E-4	0.4427478635429049E0	-2.2586218530743833E0	52.88992886606685E0	119.45834914444823E0	0.06332561045926437E0	0.6613538171238479E0	0.7731422320432413E0	-1.2934230708846735E0	92.35829469373954E0	119.45834914444823E0
chr12:55392334-55393643	Psma6	ENSMUST00000163070.7	Intron 1	0.0012375639345812161E0	0.9999999999998793E0	2.6366501738858448E0	2.6366501738858448E0	40.36904774853061E0	15.310733349595438E0	1.9048775060265803E-5	0.002392140293452914E0	15.882901919673298E0	15.882901919673298E0	40.36904774853061E0	2.541667004725858E0	0.008020655345305964E0	0.20895875543286657E0	6.023894287145944E0	6.023894287145944E0	15.310733349595438E0	2.541667004725858E0
chr13:112388218-112389390	.	.	Intergenic	0.0013697255542086016E0	0.9999999999998793E0	2.384400714127603E0	2.384400714127603E0	45.92806508761024E0	19.261890342292673E0	1.4896287057206396E-5	0.0019961579797789135E0	23.234474054965098E0	23.234474054965098E0	45.92806508761024E0	1.976720668561707E0	0.002301718872932778E0	0.09155358406337669E0	9.74436633796516E0	9.74436633796516E0	19.261890342292673E0	1.976720668561707E0
chr6:49585485-49587066	.	.	Intergenic	0.0013781485357787023E0	0.9999999999998793E0	0.16873026737933658E0	-5.926618949472869E0	3.777852063539581E0	22.38988962807886E0	0.22088847829166378E0	0.8565483502551655E0	4.2113755095046805E0	4.2113755095046805E0	3.777852063539581E0	0.8970589430966966E0	0.002809630290313395E0	0.10447543892001959E0	24.959217897976394E0	24.959217897976394E0	22.38988962807886E0	0.8970589430966966E0
chr12:25956899-25961019	.	.	Intergenic	0.0014056065426622238E0	0.9999999999998793E0	1.6823715279788543E0	1.6823715279788543E0	101.09456749116258E0	60.090512594809695E0	5.100673695944486E-4	0.029534053396993394E0	1.7794037131970935E0	1.7794037131970935E0	101.09456749116258E0	56.81373301706996E0	0.7618730090784434E0	0.942411318162877E0	1.057675836522751E0	1.057675836522751E0	60.090512594809695E0	56.81373301706996E0
chr16:95262321-95263748	Kcnj15	ENSMUST00000113862.7	5' UTR Exon	0.0014445317720631207E0	0.9999999999998793E0	3.0237615150931703E0	3.0237615150931703E0	33.35303677726777E0	11.030313273975269E0	0.21166590976833408E0	0.8565483502551655E0	0.7511197881402294E0	-1.3313455666984855E0	33.35303677726777E0	44.40441764934698E0	3.480135852483762E-5	0.004085013001251152E0	0.24840576361296976E0	-4.0256714878727875E0	11.030313273975269E0	44.40441764934698E0
chr12:85598637-85600043	Jdp2	ENSMUST00000171754.2	TSS	0.0014455106746612647E0	0.9999999999998793E0	0.5766309198081522E0	-1.7342115478869997E0	52.78199023566246E0	91.53513698714468E0	6.848406272097399E-4	0.036284780441550236E0	2.3535572852196296E0	2.3535572852196296E0	52.78199023566246E0	22.42647356286335E0	2.3896191987875923E-9	1.507458431759146E-6	4.081566222641459E0	4.081566222641459E0	91.53513698714468E0	22.42647356286335E0
chr15:60132142-60134354	AC140209.1	ENSMUST00000227875.1	Intron 3	0.0014543113053028052E0	0.9999999999998793E0	3.7816362202188194E0	3.7816362202188194E0	27.393370400123057E0	7.243787822229494E0	0.0688284428718236E0	0.6515518923548516E0	0.6406335917704714E0	-1.5609546749435577E0	27.393370400123057E0	42.75980958853256E0	9.93298588924763E-6	0.0015074582999818637E0	0.16940645648179295E0	-5.902962736886451E0	7.243787822229494E0	42.75980958853256E0
chr18:50061653-50066771	Tnfaip8	ENSMUST00000145726.1	5' UTR Exon	0.001481547175565731E0	0.9999999999998793E0	1.5533567994145239E0	1.5533567994145239E0	132.98039255662317E0	85.60840149973585E0	2.2187918716999543E-14	8.253370192272041E-11	18.151887907789412E0	18.151887907789412E0	132.98039255662317E0	7.325981365252816E0	1.7071609339488705E-10	1.7213409471311838E-7	11.685588214266705E0	11.685588214266705E0	85.60840149973585E0	7.325981365252816E0
chr16:24159804-24165191	.	.	Intergenic	0.0015043640383542284E0	0.9999999999998793E0	0.5959578501363483E0	-1.6779710171972926E0	60.01387846705921E0	100.70154869732602E0	2.0924321513546447E-7	6.035212124681272E-5	5.575059008143953E0	5.575059008143953E0	60.01387846705921E0	10.764707311508621E0	3.129543673464375E-12	6.251727123844861E-9	9.35478743483024E0	9.35478743483024E0	100.70154869732602E0	10.764707311508621E0
chr6:124907136-124909485	Lag3	ENSMUST00000139571.1	TTS	0.0015160760911125805E0	0.9999999999998793E0	1.9107997015646732E0	1.9107997015646732E0	69.83629382588722E0	36.548202183986746E0	8.432190153809748E-9	4.172502974595959E-6	11.976966832772526E0	11.976966832772526E0	69.83629382588722E0	5.830883127670894E0	3.8589571747319505E-5	0.0044097170265874975E0	6.268038886004164E0	6.268038886004164E0	36.548202183986746E0	5.830883127670894E0
chr13:45871560-45873258	Atxn1	ENSMUST00000222610.1	TSS	0.00162097094048971E0	0.9999999999998793E0	2.121426152451316E0	2.121426152451316E0	54.832824211746114E0	25.847151996493764E0	0.029310054223377624E0	0.4274386209596342E0	1.6085554581966617E0	1.6085554581966617E0	54.832824211746114E0	34.088239813141875E0	0.2886453951035672E0	0.8620384897188644E0	0.7582424947189275E0	-1.31883929872684E0	25.847151996493764E0	34.088239813141875E0
chr14:121960594-121962771	Gpr183	ENSMUST00000227267.1	5' UTR Exon	0.0016246542882060698E0	0.9999999999998793E0	2.1492756092896546E0	2.1492756092896546E0	53.42962201758489E0	24.859362748383685E0	0.29200622784158714E0	0.8565483502551655E0	1.2408517130087493E0	1.2408517130087493E0	53.42962201758489E0	43.05882923595412E0	0.029199502167132577E0	0.4492067737129339E0	0.5773348507029568E0	-1.7320970642641973E0	24.859362748383685E0	43.05882923595412E0
chr11:108203242-108206432	Prkca	ENSMUST00000134725.1	Intron 2	0.0016446798941695206E0	0.9999999999998793E0	1.6899624606018553E0	1.6899624606018553E0	96.82095140396396E0	57.29177639217063E0	6.745906195800937E-9	3.4652435193315925E-6	35.9771793433837E0	35.9771793433837E0	96.82095140396396E0	2.6911768285072517E0	9.450811218333339E-7	2.3013258658132556E-4	21.28874468050075E0	21.28874468050075E0	57.29177639217063E0	2.6911768285072517E0
chr19:47914859-47916161	Cfap43	ENSMUST00000095998.5	5' UTR Exon	0.0016610908029338805E0	0.9999999999998793E0	0.3642215260411817E0	-2.7455818190354084E0	13.22824676436371E0	36.31923381395097E0	0.8007073072143244E0	0.9538496333926694E0	1.1059680252904767E0	1.1059680252904767E0	13.22824676436371E0	11.960785901463453E0	8.634652374684901E-4	0.046165859613376554E0	3.0365257026720256E0	3.0365257026720256E0	36.31923381395097E0	11.960785901463453E0
chr14:57411229-57413613	.	.	Intergenic	0.001789904293791579E0	0.9999999999998793E0	3.8538698541486505E0	3.8538698541486505E0	26.013209914753705E0	6.7498931980670696E0	0.0017153286328235495E0	0.07069009813372298E0	28.99832849885515E0	28.99832849885515E0	26.013209914753705E0	0.8970589430966927E0	0.07251931739984831E0	0.7004724503826877E0	7.524470103119531E0	7.524470103119531E0	6.7498931980670696E0	0.8970589430966927E0
chr7:30590306-30592728	Zbtb32	ENSMUST00000108151.2	TTS	0.001793257973257346E0	0.9999999999998793E0	3.1430953864787585E0	3.1430953864787585E0	30.802265244127288E0	9.799977874243064E0	1.178812611517957E-4	0.009842264151878992E0	8.240867245168726E0	8.240867245168726E0	30.802265244127288E0	3.7377455949415226E0	0.1128483092458745E0	0.8304730666914814E0	2.621895371238177E0	2.621895371238177E0	9.799977874243064E0	3.7377455949415226E0
chr8:13673963-13678490	Rasa3	ENSMUST00000117551.3	TSS	0.0018143176250222564E0	0.9999999999998793E0	1.489128761409574E0	1.489128761409574E0	152.7331619019694E0	102.56545025521889E0	0.04053333302093039E0	0.505661181099436E0	0.8005951206781837E0	-1.249070815161727E0	152.7331619019694E0	190.77453503912093E0	4.016432749545851E-7	1.1253627272513236E-4	0.5376265245997661E0	-1.8600272758946295E0	102.56545025521889E0	190.77453503912093E0
chr19:40663744-40666469	Entpd1	ENSMUST00000127828.7	5' UTR Exon	0.0018882611503766148E0	0.9999999999998793E0	4.075585143465124E0	4.075585143465124E0	24.825884981081128E0	6.09136703250758E0	6.776631794043522E-4	0.035989404677584505E0	13.837376672757784E0	13.837376672757784E0	24.825884981081128E0	1.7941178857952802E0	0.15014722652330306E0	0.8620384897188644E0	3.3951877302686015E0	3.3951877302686015E0	6.09136703250758E0	1.7941178857952802E0
chr13:112396455-112398818	.	.	Intergenic	0.0019725518544135095E0	0.9999999999998793E0	1.7736278127309417E0	1.7736278127309417E0	80.8826373302048E0	45.6029369575942E0	5.03042295633625E-10	3.876048682634717E-7	11.270529934175855E0	11.270529934175855E0	80.8826373302048E0	7.176471541497154E0	4.1369929235674886E-6	7.667866626185493E-4	6.354506764765978E0	6.354506764765978E0	45.6029369575942E0	7.176471541497154E0
chr7:81212262-81214096	Pde8a	ENSMUST00000026672.7	TSS	0.001975181161276442E0	0.9999999999998793E0	2.0231103397779946E0	2.0231103397779946E0	58.286860381963436E0	28.810519740786617E0	0.058615225643309496E0	0.6068062101158936E0	1.4767160881653631E0	1.4767160881653631E0	58.286860381963436E0	39.47059346687124E0	0.19888332548579324E0	0.8620384897188644E0	0.7299236522746505E0	-1.3700062970746523E0	28.810519740786617E0	39.47059346687124E0
chr13:45861046-45862608	Atxn1	ENSMUST00000180110.8	5' UTR Exon	0.001984073327092233E0	0.9999999999998793E0	6.025621844215858E0	6.025621844215858E0	20.832155658654667E0	3.4572623701322978E0	0.0016253596179049191E0	0.06793197135306367E0	11.611363904005888E0	11.611363904005888E0	20.832155658654667E0	1.7941178857952795E0	0.47590301212669056E0	0.8675908474809488E0	1.9269984416881254E0	1.9269984416881254E0	3.4572623701322978E0	1.7941178857952795E0
chr8:46991482-46993095	Enpp6	ENSMUST00000119686.1	Intron 1	0.002005118268266332E0	0.9999999999998793E0	4.115947218550558E0	4.115947218550558E0	24.39413045974331E0	5.926735491115886E0	6.277901987570757E-4	0.03408234127353902E0	7.769558082856506E0	7.769558082856506E0	24.39413045974331E0	3.1397062998433394E0	0.36271242402209314E0	0.8620384897188644E0	1.8876719428857438E0	1.8876719428857438E0	5.926735491115886E0	3.1397062998433394E0
chr19:60895045-60896380	Grk5	ENSMUST00000003313.8	Intron 1	0.0020140553948182413E0	0.9999999999998793E0	9.229360201534911E0	9.229360201534911E0	19.752769355274918E0	2.140210038826948E0	0.0034032145241422534E0	0.11344714473510449E0	18.873837994279867E0	18.873837994279867E0	19.752769355274918E0	1.0465687668433643E0	0.5486667287531406E0	0.8779027527044185E0	2.04497793803096E0	2.04497793803096E0	2.140210038826948E0	1.0465687668433643E0
chr12:69537607-69539718	.	.	Intergenic	0.002023237893366956E0	0.9999999999998793E0	1.92235493452336E0	1.92235493452336E0	65.19493272229626E0	33.914097522506204E0	3.663674330662597E-5	0.004078550475454762E0	2.658889346557258E0	2.658889346557258E0	65.19493272229626E0	24.519611095027688E0	0.2211063431684534E0	0.8620384897188644E0	1.3831417387114926E0	1.3831417387114926E0	33.914097522506204E0	24.519611095027688E0
chr16:97461905-97463019	Mx1	ENSMUST00000023655.12	TSS	0.002034088023779499E0	0.9999999999998793E0	0.27755715298780875E0	-3.6028615700778692E0	7.402535230536396E0	26.6703097032471E0	0.7941909918552135E0	0.9515173191509873E0	0.8769029242262079E0	-1.140377084364743E0	7.402535230536396E0	8.441681543106386E0	0.0035807202940184965E0	0.12293540428919708E0	3.15935984638351E0	3.15935984638351E0	26.6703097032471E0	8.441681543106386E0
chr10:117909663-117911066	.	.	Intergenic	0.0020485924119922868E0	0.9999999999998793E0	2.3029959749692224E0	2.3029959749692224E0	45.11834748280441E0	19.591153425010823E0	5.5045066437985836E-6	9.121161984431408E-4	15.088756823820729E0	15.088756823820729E0	45.11834748280441E0	2.990196476065924E0	0.0024654415389213074E0	0.09618610312045504E0	6.551794700389079E0	6.551794700389079E0	19.591153425010823E0	2.990196476065924E0
chr14:27274144-27278893	Arhgef3	ENSMUST00000049206.5	Intron 2	0.002050314787685058E0	0.9999999999998793E0	2.4820566667715664E0	2.4820566667715664E0	40.04523185755404E0	16.133891056420254E0	5.9592379663895627E-5	0.0058123044950121276E0	4.320056168251173E0	4.320056168251173E0	40.04523185755404E0	9.269609074033172E0	0.1787455621506275E0	0.8620384897188644E0	1.740514721555616E0	1.740514721555616E0	16.133891056420254E0	9.269609074033172E0
chr9:13465372-13467613	Maml2	ENSMUST00000159294.8	Intron 1	0.0020529737598803757E0	0.9999999999998793E0	1.6348366382621888E0	1.6348366382621888E0	103.62108511343355E0	63.38314342133993E0	0.9828182169284055E0	0.9998888456104917E0	1.0029986745164745E0	1.0029986745164745E0	103.62108511343355E0	103.31128818628517E0	0.0021990570224386893E0	0.08865431109592482E0	0.6135161465323226E0	-1.6299489518770405E0	63.38314342133993E0	103.31128818628517E0
chr16:97534474-97537473	Mx2	ENSMUST00000024112.7	TSS	0.0020675632682451055E0	0.9999999999998793E0	0.614596132295909E0	-1.6270847593270095E0	64.65523957075831E0	105.19955491621741E0	0.024235434189490607E0	0.3831670808035938E0	0.6943446614465997E0	-1.440206939758991E0	64.65523957075831E0	93.11692472158624E0	0.39119384797516604E0	0.8620384897188644E0	1.1297576163598344E0	1.1297576163598344E0	105.19955491621741E0	93.11692472158624E0
chr6:54100684-54102057	Chn2	ENSMUST00000204410.1	Intron 1	0.0021473856392018194E0	0.9999999999998793E0	7.09631295501588E0	7.09631295501588E0	19.86070798561334E0	2.7987362044926747E0	0.012060539354042377E0	0.254699796738178E0	44.2796053441514E0	44.2796053441514E0	19.86070798561334E0	0.4485294715535808E0	0.254957433993865E0	0.8620384897188644E0	6.239804476612505E0	6.239804476612505E0	2.7987362044926747E0	0.4485294715535808E0
chr19:16327096-16330016	Gnaq	ENSMUST00000025541.5	Intron 3	0.00215541201729217E0	0.9999999999998793E0	1.5877306256783892E0	1.5877306256783892E0	113.96627550753531E0	71.7793520288374E0	1.6015905750733377E-10	1.542574822365055E-7	33.14200586234056E0	33.14200586234056E0	113.96627550753531E0	3.438725947394626E0	3.7170523332532045E-8	1.572429750372639E-5	20.87382162083067E0	20.87382162083067E0	71.7793520288374E0	3.438725947394626E0
chr12:16005865-16008294	Gm36235	ENSMUST00000223158.1	CDS Exon 3	0.00225798721096072E0	0.9999999999998793E0	4.462565668239106E0	4.462565668239106E0	22.775051004714786E0	5.103577784145335E0	0.12296301180124039E0	0.8072104305693705E0	0.6594435865509249E0	-1.5164299424462988E0	22.775051004714786E0	34.53676928429117E0	5.5354644588628715E-5	0.005810233045663801E0	0.1477722986228091E0	-6.767168199450658E0	5.103577784145335E0	34.53676928429117E0
chr10:128524090-128526672	Esyt1	ENSMUST00000217948.1	TSS	0.002266939651820361E0	0.9999999999998793E0	1.6842344640014355E0	1.6842344640014355E0	92.05633445138041E0	54.65767173097222E0	0.2748421569897319E0	0.8565483502551655E0	0.8563574063318596E0	-1.167736733058014E0	92.05633445138041E0	107.49756324955085E0	4.6756522491568475E-5	0.005120574975363417E0	0.5084549833384301E0	-1.9667424506967517E0	54.65767173097222E0	107.49756324955085E0
chr2:4881448-4882772	Sephs1	ENSMUST00000027973.13	TSS	0.002308469595800814E0	0.9999999999998793E0	1.927376894048023E0	1.927376894048023E0	63.14409874632305E0	32.76167673345042E0	0.11447740319172262E0	0.7892261081677442E0	0.7678923659311794E0	-1.3022658439732722E0	63.14409874632305E0	82.23040304581203E0	8.42591218036041E-6	0.001319847073072805E0	0.398413184417913E0	-2.5099570975820327E0	32.76167673345042E0	82.23040304581203E0
chr16:93573289-93576879	.	.	Intergenic	0.002320820913878722E0	0.9999999999998793E0	0.6422572508478026E0	-1.5570085019358897E0	77.71581383886856E0	121.00418288198522E0	0.11060769400576412E0	0.7796489941312013E0	0.7852025122201858E0	-1.2735568015090366E0	77.71581383886856E0	98.97550329930115E0	0.13814504183129142E0	0.8620384897188644E0	1.2225669872682485E0	1.2225669872682485E0	121.00418288198522E0	98.97550329930115E0
chr13:41670386-41671660	.	.	Intergenic	0.0023577342616148034E0	0.9999999999998793E0	2.7811208698748233E0	2.7811208698748233E0	33.423795740832645E0	12.01810252221689E0	7.209883368303489E-4	0.03755440601588616E0	37.25930831863956E0	37.25930831863956E0	33.423795740832645E0	0.8970589430966934E0	0.017743157722963445E0	0.339423240476901E0	13.397227255468612E0	13.397227255468612E0	12.01810252221689E0	0.8970589430966934E0
chr13:52902849-52905148	Auh	ENSMUST00000021913.15	Intron 3	0.002403120266469255E0	0.9999999999998793E0	4.251710562019273E0	4.251710562019273E0	23.09886689572199E0	5.4328408669360595E0	0.0017223046292855844E0	0.07077720658092337E0	4.8280412095081235E0	4.8280412095081235E0	23.09886689572199E0	4.784314361325694E0	0.8393273853556167E0	0.9677799761370617E0	1.1355526532396722E0	1.1355526532396722E0	5.4328408669360595E0	4.784314361325694E0
chr1:60936025-60938095	.	.	Intergenic	0.002442975992265174E0	0.9999999999998793E0	1.92386591656075E0	1.92386591656075E0	62.71234422500416E0	32.59704519175305E0	2.2487706414130368E-7	6.333724161909883E-5	19.973952413362134E0	19.973952413362134E0	62.71234422500416E0	3.1397062998433394E0	7.496171866990881E-5	0.007459728300810953E0	10.382195682882674E0	10.382195682882674E0	32.59704519175305E0	3.1397062998433394E0
chr11:79678170-79679049	Rab11fip4	ENSMUST00000155381.1	Intron 1	0.0025203820390915267E0	0.9999999999998793E0	2.7645645445298075E0	2.7645645445298075E0	33.224820125445085E0	12.0181025222169E0	7.364783246129712E-4	0.03810365770310554E0	37.03749946547686E0	37.03749946547686E0	33.224820125445085E0	0.8970589430966951E0	0.017743157722963445E0	0.339423240476901E0	13.3972272554686E0	13.3972272554686E0	12.0181025222169E0	0.8970589430966951E0
chr17:73149982-73153339	Lclat1	ENSMUST00000067545.7	5' UTR Exon	0.0025896585538198553E0	0.9999999999998793E0	1.8043360246148028E0	1.8043360246148028E0	73.07445273533817E0	40.49935917614815E0	4.516557045171557E-9	2.4731703458568088E-6	12.862110765552979E0	12.862110765552979E0	73.07445273533817E0	5.681373303909383E0	1.1657423960356888E-5	0.0017016526317666827E0	7.128445361666398E0	7.128445361666398E0	40.49935917614815E0	5.681373303909383E0
chr2:32771895-32773688	Ttc16	ENSMUST00000123674.2	TTS	0.002691954082311319E0	0.9999999999998793E0	0.32219905421275674E0	-3.10367143206967E0	9.282722211859388E0	28.810519740786564E0	0.05625051377622515E0	0.5940967542628994E0	4.139180501218215E0	4.139180501218215E0	9.282722211859388E0	2.2426473571585874E0	2.3088377178918232E-4	0.017613949868609948E0	12.846656273810794E0	12.846656273810794E0	28.810519740786564E0	2.2426473571585874E0
chrX:12078350-12080613	Bcor	ENSMUST00000115512.8	TSS	0.0027046229457438516E0	0.9999999999998793E0	1.6752467309205545E0	1.6752467309205545E0	90.41429563840752E0	53.97073396390066E0	0.3115931554398028E0	0.8565483502551655E0	1.1697063048240668E0	1.1697063048240668E0	90.41429563840752E0	77.29657886387692E0	0.042869068598871005E0	0.5520123920947677E0	0.6982292716854362E0	-1.4321943243458237E0	53.97073396390066E0	77.29657886387692E0
chr14:20180393-20181942	Kcnk5	ENSMUST00000024011.9	TSS	0.002727363288716162E0	0.9999999999998793E0	2.4569156757121697E0	2.4569156757121697E0	38.42615240266475E0	15.63999643232624E0	1.6537622583895236E-5	0.002149300578964418E0	9.17907968170044E0	9.17907968170044E0	38.42615240266475E0	4.18627506625438E0	0.016615138028819854E0	0.326661174968354E0	3.7360173865306803E0	3.7360173865306803E0	15.63999643232624E0	4.18627506625438E0
chr14:70993710-70995017	.	.	Intergenic	0.002733466033674224E0	0.9999999999998793E0	0.3638788737182694E0	-2.7481672397783745E0	11.981187970604571E0	32.92630827444222E0	0.017695256001794873E0	0.3193898124352757E0	6.678038308109087E0	6.678038308109087E0	11.981187970604571E0	1.794117885795281E0	1.4747121089068928E-4	0.0124672115457769E0	18.352366104330393E0	18.352366104330393E0	32.92630827444222E0	1.794117885795281E0
chr4:156007276-156008638	Sdf4	ENSMUST00000149971.1	TSS	0.0027558841228597143E0	0.9999999999998793E0	2.0592851038970723E0	2.0592851038970723E0	52.548608523070286E0	25.51788891379112E0	2.4064101709403385E-6	4.681576011291927E-4	20.6748596198337E0	20.6748596198337E0	52.548608523070286E0	2.541667004725857E0	4.537970167771686E-4	0.0290346652377245E0	10.039823811043835E0	10.039823811043835E0	25.51788891379112E0	2.541667004725857E0
chr10:96721704-96724079	.	.	Intergenic	0.002775371139676458E0	0.9999999999998793E0	4.081513624297317E0	4.081513624297317E0	22.9909282653864E0	5.632941693130958E0	4.219416091048677E-4	0.025737114458274132E0	0.4167354164782481E0	-2.399604066414154E0	22.9909282653864E0	55.16912495625731E0	2.4932671668185117E-7	7.773300840642003E-5	0.10210315457417939E0	-9.794016689988611E0	5.632941693130958E0	55.16912495625731E0
chr12:73793287-73795896	Gm8075	ENSMUST00000222997.1	TSS	0.002782218054631556E0	0.9999999999998793E0	0.4902151978327866E0	-2.039920435802364E0	26.229087175420414E0	53.505250941581814E0	4.649494408756656E-4	0.027542828685107455E0	6.497550786301879E0	6.497550786301879E0	26.229087175420414E0	4.03676524248437E0	5.539915560284829E-7	1.4647238020456014E-4	13.254486631640917E0	13.254486631640917E0	53.505250941581814E0	4.03676524248437E0
chr2:31060169-31063614	Fnbp1	ENSMUST00000149196.1	Intron 6	0.0028046009162583244E0	0.9999999999998793E0	1.5431638908208867E0	1.5431638908208867E0	120.6753887019086E0	78.19998214040329E0	0.002408070102865431E0	0.08942022244626596E0	1.5551834255699986E0	1.5551834255699986E0	120.6753887019086E0	77.59559851126836E0	0.9613807791540351E0	0.9998571342969699E0	1.0077888906166137E0	1.0077888906166137E0	78.19998214040329E0	77.59559851126836E0
chr9:45006721-45010908	Cd3e	ENSMUST00000102832.2	TSS	0.0028350177228653006E0	0.9999999999998793E0	1.4385137642484758E0	1.4385137642484758E0	164.35636834107697E0	114.25428968831714E0	4.022853028341709E-5	0.004378983095119124E0	1.6912330240938214E0	1.6912330240938214E0	164.35636834107697E0	97.18138541502326E0	0.24085659405067636E0	0.8620384897188644E0	1.1756808075989276E0	1.1756808075989276E0	114.25428968831714E0	97.18138541502326E0
chr11:88597814-88600158	Msi2	ENSMUST00000144699.7	Intron 5	0.0028549866430477673E0	0.9999999999998793E0	1.7574282195285442E0	1.7574282195285442E0	77.17612068730163E0	43.91423776500259E0	2.2990081856556988E-4	0.016377054322726597E0	2.089855516449129E0	2.089855516449129E0	77.17612068730163E0	36.92892646398421E0	0.4377929076995103E0	0.8644800785043375E0	1.1891555474224507E0	1.1891555474224507E0	43.91423776500259E0	36.92892646398421E0
chr15:44589317-44591570	Pkhd1l1	ENSMUST00000209939.1	TSS	0.0028653029299294894E0	0.9999999999998793E0	4.866848412811435E0	4.866848412811435E0	20.832155658654685E0	4.280420077152262E0	0.004703738921407749E0	0.14036384828764575E0	27.86727335417881E0	27.86727335417881E0	20.832155658654685E0	0.7475491194954249E0	0.1638965466222692E0	0.8620384897188644E0	5.72593822335237E0	5.72593822335237E0	4.280420077152262E0	0.7475491194954249E0
chr10:96724079-96725993	.	.	Intergenic	0.0029070372514223746E0	0.9999999999998793E0	2.056317958985869E0	2.056317958985869E0	52.134358453738265E0	25.353257372439515E0	0.9153442757977962E0	0.9942876877828037E0	0.9794996974989391E0	-1.0209293607271208E0	52.134358453738265E0	53.22549724809357E0	0.0021172881484505567E0	0.08623408634678612E0	0.4763366935636777E0	-2.099355379319141E0	25.353257372439515E0	53.22549724809357E0
chr4:137874658-137876465	Ece1	ENSMUST00000102518.9	5' UTR Exon	0.0029386294659021245E0	0.9999999999998793E0	1.9320384893912776E0	1.9320384893912776E0	59.798001206422576E0	30.950729778299067E0	1.135553882918514E-7	3.667533054253559E-5	12.901946721126407E0	12.901946721126407E0	59.798001206422576E0	4.634804537559112E0	1.3772712232524586E-4	0.011860122903720757E0	6.677893215880697E0	6.677893215880697E0	30.950729778299067E0	4.634804537559112E0
chr2:27197531-27199760	Sardh	ENSMUST00000127805.7	TTS	0.0030664037387281885E0	0.9999999999998793E0	0.49962745601754777E0	-2.001491287069857E0	27.308473478749782E0	54.657671730895956E0	0.25967690248644515E0	0.8565483502551655E0	0.7516599677792178E0	-1.3303887966183747E0	27.308473478749782E0	36.330887168878725E0	0.05639396076770062E0	0.6277567715563165E0	1.5044408763493138E0	1.5044408763493138E0	54.657671730895956E0	36.330887168878725E0
chr13:45851642-45852640	Atxn1	ENSMUST00000221082.1	CDS Exon 3	0.0030673348479636105E0	0.9999999999998793E0	6.672076854513615E0	6.672076854513615E0	18.673383051885178E0	2.7987362044927226E0	0.006366849566837182E0	0.17110392708605562E0	24.979473007057013E0	24.979473007057013E0	18.673383051885178E0	0.7475491194954239E0	0.31059030321643655E0	0.8620384897188644E0	3.7438826847683218E0	3.7438826847683218E0	2.7987362044927226E0	0.7475491194954239E0
chr2:71273931-71275563	Slc25a12	ENSMUST00000147553.1	TTS	0.003076800048126574E0	0.9999999999998793E0	2.2633750540002024E0	2.2633750540002024E0	42.85163624600306E0	18.93262725957358E0	5.5057998757826244E-5	0.005499325462965732E0	28.661418461218236E0	28.661418461218236E0	42.85163624600306E0	1.4950982382112599E0	0.002804945926791222E0	0.10440922427907191E0	12.663132612760371E0	12.663132612760371E0	18.93262725957358E0	1.4950982382112599E0
chr11:69268565-69270099	.	.	Intergenic	0.0030891747517939323E0	0.9999999999998793E0	3.9712906665193004E0	3.9712906665193004E0	22.882989635050546E0	5.762103949723403E0	0.0010495785013781816E0	0.04994674278328574E0	6.654496457441747E0	6.654496457441747E0	22.882989635050546E0	3.438725947394625E0	0.44873900989821247E0	0.8644800785043375E0	1.6756508188996864E0	1.6756508188996864E0	5.762103949723403E0	3.438725947394625E0
chr4:116014994-116018539	Faah	ENSMUST00000125761.7	TSS	0.003130991375618853E0	0.9999999999998793E0	1.5674313098259938E0	1.5674313098259938E0	110.96091197435007E0	70.79156278093504E0	0.9585891709309863E0	0.9998888456104917E0	1.007007720551995E0	1.007007720551995E0	110.96091197435007E0	110.1887400759216E0	0.003675947462426941E0	0.1254065403587544E0	0.6424573212486017E0	-1.5565236272139011E0	70.79156278093504E0	110.1887400759216E0
chr2:44425870-44428625	Gm22867	ENSMUST00000157499.1	TSS	0.0031356220943965897E0	0.9999999999998793E0	3.181982699663317E0	3.181982699663317E0	27.240445262391443E0	8.560840153302449E0	5.495714616235613E-4	0.031169254616045444E0	18.21983637341584E0	18.21983637341584E0	27.240445262391443E0	1.4950982382112592E0	0.0489904997455591E0	0.5893556573048634E0	5.72593822566781E0	5.72593822566781E0	8.560840153302449E0	1.4950982382112592E0
chr4:156011160-156014901	Tnfrsf4	ENSMUST00000143576.1	TSS	0.0031745465354407307E0	0.9999999999998793E0	1.5026571968884153E0	1.5026571968884153E0	131.36131310207125E0	87.41934845424755E0	2.879256685046339E-10	2.5251549299675104E-7	3.00894950834501E0	3.00894950834501E0	131.36131310207125E0	43.656868530945516E0	1.7926546682584416E-4	0.014572647854487029E0	2.002419124319044E0	2.002419124319044E0	87.41934845424755E0	43.656868530945516E0
chr2:158704520-158708635	Ppp1r16b	ENSMUST00000045503.10	Intron 2	0.0031825218171561134E0	0.9999999999998793E0	1.635368811646485E0	1.635368811646485E0	94.77011742809462E0	57.95030255754988E0	0.8084863896550802E0	0.9565603199352659E0	1.0361663585618714E0	1.0361663585618714E0	94.77011742809462E0	91.4622605192752E0	0.006569510678642183E0	0.18421440744402603E0	0.6335979695727851E0	-1.5782878860458913E0	57.95030255754988E0	91.4622605192752E0
chr14:121101484-121102417	Farp1	ENSMUST00000153607.1	TSS	0.003206220530251588E0	0.9999999999998793E0	3.6551796760161928E0	3.6551796760161928E0	24.070314568739104E0	6.585261656678261E0	0.9995187158665415E0	0.9998888456104917E0	1000000.0E0	1000000.0E0	24.070314568739104E0	2.0611536302015335E-10	0.9995431949411437E0	0.9998571342969699E0	1000000.0E0	1000000.0E0	6.585261656678261E0	2.0611536302015335E-10
chr14:73115125-73120821	.	.	Intergenic	0.0032610570674703066E0	0.9999999999998793E0	1.494805453704507E0	1.494805453704507E0	133.62802433845064E0	89.39492695004994E0	0.6647041397532711E0	0.9052495148319469E0	1.0552233865815053E0	1.0552233865815053E0	133.62802433845064E0	126.63482068128828E0	0.011706312085073932E0	0.2654603749323482E0	0.705926904378355E0	-1.4165772600501862E0	89.39492695004994E0	126.63482068128828E0
chr10:128641714-128643526	Ikzf4	ENSMUST00000223145.1	TTS	0.003335162669714252E0	0.9999999999998793E0	0.12631550292502963E0	-7.916684625746348E0	2.266711238319492E0	17.944838011410393E0	0.3775159505287349E0	0.8565483502551655E0	0.48906296262349636E0	-2.0447265003173976E0	2.266711238319492E0	4.6348045375591305E0	0.009376107513731618E0	0.23070695745688968E0	3.871757237223395E0	3.871757237223395E0	17.944838011410393E0	4.6348045375591305E0
chr9:104274552-104275972	.	.	Intergenic	0.0033856786270923906E0	0.9999999999998793E0	2.404004570345179E0	2.404004570345179E0	37.99439788135895E0	15.804627973691213E0	1.4004006442385527E-4	0.011290390037066172E0	28.236270076536975E0	28.236270076536975E0	37.99439788135895E0	1.345588414417757E0	0.006084960411140735E0	0.17494076157979985E0	11.745514307604942E0	11.745514307604942E0	15.804627973691213E0	1.345588414417757E0
chr12:15813088-15818390	Trib2	ENSMUST00000221518.1	TSS	0.003395008347344969E0	0.9999999999998793E0	1.3768389813272528E0	1.3768389813272528E0	199.47058882127766E0	144.87575637130124E0	0.003211739110723073E0	0.10905254425276363E0	1.3796936523299692E0	1.3796936523299692E0	199.47058882127766E0	144.57599952309707E0	0.98594284283987E0	0.9998571342969699E0	1.00207335138054E0	1.00207335138054E0	144.87575637130124E0	144.57599952309707E0
chr7:30593286-30595091	Zbtb32	ENSMUST00000108151.2	TSS	0.0034185964855749456E0	0.9999999999998793E0	2.3132874167622717E0	2.3132874167622717E0	40.369047748530576E0	17.45094338732538E0	1.3076860420642161E-5	0.0017969938396890852E0	12.857587268766139E0	12.857587268766139E0	40.369047748530576E0	3.1397062998433407E0	0.005142754427815003E0	0.15658039751388309E0	5.558145164149946E0	5.558145164149946E0	17.45094338732538E0	3.1397062998433407E0
chr16:52146619-52148610	Cblb	ENSMUST00000114471.2	Intron 9	0.0034318964039102367E0	0.9999999999998793E0	1.9448126861915582E0	1.9448126861915582E0	56.99159681813597E0	29.30441436483023E0	0.8410321302267375E0	0.9667727085600194E0	1.0386638862336153E0	1.0386638862336153E0	56.99159681813597E0	54.87010530884817E0	0.006119018780982252E0	0.1755523704683241E0	0.534068855889451E0	-1.8724177397211754E0	29.30441436483023E0	54.87010530884817E0
chr12:35711491-35713728	.	.	Intergenic	0.0034728708553179214E0	0.9999999999998793E0	4.613746144598988E0	4.613746144598988E0	20.50833976764177E0	4.445051618552864E0	0.007047206952169382E0	0.18191035069427322E0	34.29262914029309E0	34.29262914029309E0	20.50833976764177E0	0.5980392953757202E0	0.14530247251905493E0	0.8620384897188644E0	7.4327082733923815E0	7.4327082733923815E0	4.445051618552864E0	0.5980392953757202E0
chr10:111233516-111235622	Osbpl8	ENSMUST00000217693.1	TSS	0.0035538875021591475E0	0.9999999999998793E0	2.0940151283950024E0	2.0940151283950024E0	48.140629131843156E0	22.989628145017964E0	1.7245132838361634E-6	3.513129858690614E-4	11.925545886392845E0	11.925545886392845E0	48.140629131843156E0	4.036765242484376E0	0.0012664116625248404E0	0.06031418334284419E0	5.69506195283957E0	5.69506195283957E0	22.989628145017964E0	4.036765242484376E0
chr8:72320694-72323009	Klf2	ENSMUST00000067912.7	TTS	0.0035598726455953757E0	0.9999999999998793E0	2.9510719157275247E0	2.9510719157275247E0	28.664531578910907E0	9.713260942962911E0	0.10408145551932281E0	0.7643528389431486E0	0.6750823905694207E0	-1.4813006737688963E0	28.664531578910907E0	42.460789941110534E0	3.366675113934993E-5	0.003982163865849885E0	0.22875836639955052E0	-4.37142481710765E0	9.713260942962911E0	42.460789941110534E0
chr2:131501040-131502674	Smox	ENSMUST00000110188.7	5' UTR Exon	0.0035605276455424016E0	0.9999999999998793E0	0.3258558183004718E0	-3.068841935109778E0	8.958906320801747E0	27.493467409996455E0	0.16069148538320485E0	0.8565483502551655E0	2.3613605604687224E0	2.3613605604687224E0	8.958906320801747E0	3.79395949554753E0	2.990392626137261E-4	0.02137724478192874E0	7.246642311880743E0	7.246642311880743E0	27.493467409996455E0	3.79395949554753E0
chr8:46942528-46944818	.	.	Intergenic	0.0036206749950650915E0	0.9999999999998793E0	1.7014816871948355E0	1.7014816871948355E0	80.95397274823598E0	47.578515453611224E0	1.4228407103569645E-9	9.246150358333543E-7	15.92536957185833E0	15.92536957185833E0	80.95397274823598E0	5.083334008856504E0	1.6475414874170218E-6	3.641910714592959E-4	9.359706714277863E0	9.359706714277863E0	47.578515453611224E0	5.083334008856504E0
chr17:80166535-80169284	Galm	ENSMUST00000133955.1	Intron 2	0.0036801674745419854E0	0.9999999999998793E0	1.606433926134375E0	1.606433926134375E0	97.85378653751648E0	60.91367030138978E0	2.7170493385717033E-10	2.402428387702831E-7	23.374906089262307E0	23.374906089262307E0	97.85378653751648E0	4.18627506625438E0	1.1637117300823813E-7	4.143005790731905E-5	14.550804554725925E0	14.550804554725925E0	60.91367030138978E0	4.18627506625438E0
chr6:49587351-49588464	.	.	Intergenic	0.0037071902715999252E0	0.9999999999998793E0	0.041300006969189465E0	-24.213070974685735E0	0.8635090434308436E0	20.908205755874E0	0.8175366901414348E0	0.9607957894077321E0	0.7219500877270615E0	-1.3851373065807526E0	0.8635090434308436E0	1.1960785906259208E0	0.0023412351700708325E0	0.09271514739392471E0	17.480628714315934E0	17.480628714315934E0	20.908205755874E0	1.1960785906259208E0
chr11:11722899-11730206	Ikzf1	ENSMUST00000048122.12	Intron 3	0.003717690876999515E0	0.9999999999998793E0	1.4017668696257868E0	1.4017668696257868E0	177.2352309800205E0	126.43702374513595E0	0.03193934908096605E0	0.44646093800253145E0	0.8053274754581521E0	-1.2417308864708712E0	177.2352309800205E0	220.07846047869046E0	6.823631776062505E-7	1.7401551550335476E-4	0.5745088522980578E0	-1.7406172176459267E0	126.43702374513595E0	220.07846047869046E0
chr4:102517764-102519561	Pde4b	ENSMUST00000173119.7	3' UTR Exon	0.003739464213786846E0	0.9999999999998793E0	4.26164446519987E0	4.26164446519987E0	21.048032919329486E0	4.938946242748652E0	0.1611327987690167E0	0.8565483502551655E0	0.6735897946910339E0	-1.4845830620974385E0	21.048032919329486E0	31.247553162505856E0	1.391800881904154E-4	0.01194413178469744E0	0.15805865557098805E0	-6.326765189717024E0	4.938946242748652E0	31.247553162505856E0
chr13:107902630-107904807	.	.	Intergenic	0.0037622268418485054E0	0.9999999999998793E0	1.9708388040616855E0	1.9708388040616855E0	54.18519242982631E0	27.49346740999644E0	0.19283862427558549E0	0.8565483502551655E0	1.3083716388312585E0	1.3083716388312585E0	54.18519242982631E0	41.41422117513097E0	0.09585329739287392E0	0.7872877084741072E0	0.6638653735327548E0	-1.5063295057528114E0	27.49346740999644E0	41.41422117513097E0
chr11:103807748-103809751	Wnt3	ENSMUST00000000127.5	CDS Exon 2	0.0037819975079236056E0	0.9999999999998793E0	3.806340569417823E0	3.806340569417823E0	22.559173744042837E0	5.926735491115879E0	0.0014884540123837615E0	0.06376938641511581E0	16.76528535941977E0	16.76528535941977E0	22.559173744042837E0	1.345588414417754E0	0.12051795558598093E0	0.8504371965020296E0	4.404567866081413E0	4.404567866081413E0	5.926735491115879E0	1.345588414417754E0
chr10:95000296-95001930	AC159379.1	ENSMUST00000218192.1	TSS	0.0037824280828801723E0	0.9999999999998793E0	4.44896949660492E0	4.44896949660492E0	20.50833976764176E0	4.609683159952435E0	0.0022065202965715768E0	0.08366395920986493E0	15.241168508808736E0	15.241168508808736E0	20.50833976764176E0	1.3455884144177546E0	0.20888257640501642E0	0.8620384897188644E0	3.4257750070976027E0	3.4257750070976027E0	4.609683159952435E0	1.3455884144177546E0
chr9:61748462-61750175	.	.	Intergenic	0.003809606171235589E0	0.9999999999998793E0	2.117651994654569E0	2.117651994654569E0	46.36809749519377E0	21.895995004012608E0	0.013345762723421617E0	0.2711582842463415E0	1.8460364236055475E0	1.8460364236055475E0	46.36809749519377E0	25.11765038992616E0	0.6387205590929803E0	0.898654026568547E0	0.8717373904047312E0	-1.1471344593074284E0	21.895995004012608E0	25.11765038992616E0
chr13:45866153-45868108	Atxn1	ENSMUST00000180110.8	5' UTR Exon	0.0038304035586737713E0	0.9999999999998793E0	4.340773142259072E0	4.340773142259072E0	20.72421702831712E0	4.774314701351013E0	0.0020378799122283482E0	0.07941915454183837E0	6.026713772878286E0	6.026713772878286E0	20.72421702831712E0	3.4387259473946257E0	0.6426824546160009E0	0.9009066598331948E0	1.3883963928466896E0	1.3883963928466896E0	4.774314701351013E0	3.4387259473946257E0
chr1:192536832-192538034	Hhat	ENSMUST00000128619.7	Intron 11	0.0038587742790242604E0	0.9999999999998793E0	2.217686254181688E0	2.217686254181688E0	42.35172833537989E0	19.097258800933233E0	3.0303320590444955E-4	0.020291186232483355E0	47.21175644175567E0	47.21175644175567E0	42.35172833537989E0	0.8970589430966942E0	0.0046441601681308205E0	0.1470896079848246E0	21.288744678257707E0	21.288744678257707E0	19.097258800933233E0	0.8970589430966942E0
chr8:13686571-13687675	.	.	Intergenic	0.003874822029162125E0	0.9999999999998793E0	2.817192855797801E0	2.817192855797801E0	29.68312334604912E0	10.53641864984893E0	0.005021784759251261E0	0.14716516906675123E0	0.5289937133591599E0	-1.8903816335545953E0	29.68312334604912E0	56.11243119990687E0	6.323257410239045E-7	1.6357523899633488E-4	0.18777334049761182E0	-5.325569632781382E0	10.53641864984893E0	56.11243119990687E0
chr7:130645769-130646793	Tacc2	ENSMUST00000209108.1	TSS	0.0038875154928521374E0	0.9999999999998793E0	2.31419133128002E0	2.31419133128002E0	39.241855251977896E0	16.95704876323797E0	0.36930994571373477E0	0.8565483502551655E0	1.2391861135369504E0	1.2391861135369504E0	39.241855251977896E0	31.667442705576903E0	0.03792632639744205E0	0.5172874709155729E0	0.5354726278624227E0	-1.8675090900387292E0	16.95704876323797E0	31.667442705576903E0
chr9:123935680-123936512	.	.	Intergenic	0.0038978045380946296E0	0.9999999999998793E0	3.23721069967714E0	3.23721069967714E0	25.58145539341931E0	7.902313987770601E0	6.463522517563279E-4	0.03484455594888074E0	15.554742789140406E0	15.554742789140406E0	25.58145539341931E0	1.6446080620040264E0	0.06704539833043231E0	0.6786640611511519E0	4.804983126582321E0	4.804983126582321E0	7.902313987770601E0	1.6446080620040264E0
chr12:31290089-31292060	Lamb1	ENSMUST00000169088.7	Intron 13	0.0039187082359233615E0	0.9999999999998793E0	11.801476978523553E0	11.801476978523553E0	17.48605811814428E0	1.4816838731258455E0	0.015418068618951779E0	0.29576841002477566E0	38.985304706015114E0	38.985304706015114E0	17.48605811814428E0	0.4485294715535806E0	0.48319786963907574E0	0.8680120346620784E0	3.303425899737886E0	3.303425899737886E0	1.4816838731258455E0	0.4485294715535806E0
chr2:33876970-33880832	Mvb12b	ENSMUST00000148660.2	5' UTR Exon	0.003940540997587961E0	0.9999999999998793E0	0.55047268029126E0	-1.8166205804634867E0	36.15944116580009E0	65.68798499985105E0	8.739211463680014E-5	0.007797559621352805E0	4.837065585599131E0	4.837065585599131E0	36.15944116580009E0	7.475491189007992E0	1.8036272755410066E-8	8.608968367010398E-6	8.787112891851049E0	8.787112891851049E0	65.68798499985105E0	7.475491189007992E0
chr1:138591759-138593441	Nek7	ENSMUST00000187407.6	5' UTR Exon	0.003966730069641853E0	0.9999999999998793E0	2.270448760903476E0	2.270448760903476E0	40.3690477485306E0	17.78020647004894E0	1.698094997971257E-5	0.002185902168450518E0	15.000518479836431E0	15.000518479836431E0	40.3690477485306E0	2.6911768285072495E0	0.0038946281397690637E0	0.130688329693622E0	6.6068517987022535E0	6.6068517987022535E0	17.78020647004894E0	2.6911768285072495E0
chr2:70844446-70845756	.	.	Intergenic	0.003978156566277491E0	0.9999999999998793E0	2.344401151255652E0	2.344401151255652E0	38.210275142011966E0	16.298522597784384E0	0.0059627239986965175E0	0.16445697338974416E0	2.2223507041232855E0	2.2223507041232855E0	38.210275142011966E0	17.193629732300003E0	0.8770970449516058E0	0.9767525527792186E0	0.9479396062115919E0	-1.054919525935271E0	16.298522597784384E0	17.193629732300003E0
chr14:59053076-59055756	AC129308.2	ENSMUST00000224109.1	Intron 2	0.004070341185508557E0	0.9999999999998793E0	3.12392037736918E0	3.12392037736918E0	26.229087175420435E0	8.396208611920306E0	5.710071253323116E-4	0.031981439060733356E0	15.948533745760168E0	15.948533745760168E0	26.229087175420435E0	1.6446080620040258E0	0.05590029227657947E0	0.6267507755348111E0	5.105294571941453E0	5.105294571941453E0	8.396208611920306E0	1.6446080620040258E0
chr4:141424859-141427705	Hspb7	ENSMUST00000102486.4	TTS	0.004147632564693538E0	0.9999999999998793E0	1.8479981657886073E0	1.8479981657886073E0	62.06471244309913E0	33.58483443981877E0	4.495005093351371E-8	1.6851515570273897E-5	9.883840481108258E0	9.883840481108258E0	62.06471244309913E0	6.279412598951609E0	1.1498219642420621E-4	0.010276283740570337E0	5.348403837235666E0	5.348403837235666E0	33.58483443981877E0	6.279412598951609E0
chr15:53490202-53492589	Samd12	ENSMUST00000132059.1	3' UTR Exon	0.004151961046456698E0	0.9999999999998793E0	2.078941134926326E0	2.078941134926326E0	47.231781121131704E0	22.719152710788766E0	7.864672411023265E-4	0.040216656532482374E0	78.97772184260597E0	78.97772184260597E0	47.231781121131704E0	0.5980392953757202E0	0.0054952345770752555E0	0.16343739716924152E0	37.989397831317056E0	37.989397831317056E0	22.719152710788766E0	0.5980392953757202E0
chr2:73403568-73404774	D230022J07Rik	ENSMUST00000144735.1	Intron 2	0.004160522136145631E0	0.9999999999998793E0	5.0170530157492195E0	5.0170530157492195E0	18.99719894290318E0	3.7865254529438612E0	0.0024579631290319896E0	0.0905250449361797E0	9.075943954955575E0	9.075943954955575E0	18.99719894290318E0	2.093137533372546E0	0.49130300397247934E0	0.8692466617758743E0	1.8090189452782215E0	1.8090189452782215E0	3.7865254529438612E0	2.093137533372546E0
chr8:4311936-4314894	Elavl1	ENSMUST00000209010.1	TSS	0.0041751437745031076E0	0.9999999999998793E0	1.5351871719656383E0	1.5351871719656383E0	113.22762321079264E0	73.75493052473666E0	2.3950111465215808E-4	0.016853035708331538E0	1.7777597225659465E0	1.7777597225659465E0	113.22762321079264E0	63.69118490735321E0	0.39109415332172764E0	0.8620384897188644E0	1.1580084533208552E0	1.1580084533208552E0	73.75493052473666E0	63.69118490735321E0
chr10:26373193-26376443	L3mbtl3	ENSMUST00000040219.12	TSS	0.004207154923919544E0	0.9999999999998793E0	1.6840007109560378E0	1.6840007109560378E0	80.9539727482595E0	48.07241007772524E0	0.527613208268337E0	0.863612532886662E0	1.10728541040262E0	1.10728541040262E0	80.9539727482595E0	73.11030380037593E0	0.023955039468573906E0	0.4025708011518107E0	0.6575326264405161E0	-1.5208370806075358E0	48.07241007772524E0	73.11030380037593E0
chr4:63851913-63855291	Tnfsf8	ENSMUST00000030047.2	Intron 1	0.004243487855691945E0	0.9999999999998793E0	1.8581890055737527E0	1.8581890055737527E0	60.87738750960365E0	32.76167673309775E0	7.930634956905434E-8	2.750808310952604E-5	7.020342228786149E0	7.020342228786149E0	60.87738750960365E0	8.671569779031932E0	5.00553156224908E-4	0.03122971117492742E0	3.77805605766055E0	3.77805605766055E0	32.76167673309775E0	8.671569779031932E0
chr9:95405526-95407974	Gm37805	ENSMUST00000192612.1	TSS	0.004252134911016634E0	0.9999999999998793E0	1.689996554095749E0	1.689996554095749E0	79.85107369049368E0	47.24925237094278E0	5.669531964650425E-10	4.2313030880506856E-7	10.270880749877382E0	10.270880749877382E0	79.85107369049368E0	7.774510836516817E0	3.1250548424077873E-6	6.140419690620314E-4	6.077456622610056E0	6.077456622610056E0	47.24925237094278E0	7.774510836516817E0
chr6:32795584-32797265	Chchd3	ENSMUST00000124436.7	3' UTR Exon	0.004252333821901832E0	0.9999999999998793E0	6.993467839742706E0	6.993467839742706E0	17.270180857462666E0	2.469473121663493E0	0.0043524628232174825E0	0.13346026780242737E0	12.834668218316663E0	12.834668218316663E0	17.270180857462666E0	1.3455884144177546E0	0.5709481100349906E0	0.8802935339883478E0	1.8352366111386675E0	1.8352366111386675E0	2.469473121663493E0	1.3455884144177546E0
chr5:150222924-150223875	Fry	ENSMUST00000200960.3	5' UTR Exon	0.004273359795246314E0	0.9999999999998793E0	0.1209428601755355E0	-8.268367380667266E0	2.0508339775620357E0	16.957048763238046E0	0.7040517395071024E0	0.9172058313379831E0	1.5241168514738184E0	1.5241168514738184E0	2.0508339775620357E0	1.3455884144177546E0	0.00466807674814486E0	0.14750738187844112E0	12.601958059051416E0	12.601958059051416E0	16.957048763238046E0	1.3455884144177546E0
chr6:15792269-15794060	Mdfic	ENSMUST00000189359.6	Intron 4	0.00433555838276087E0	0.9999999999998793E0	1.8267836945380111E0	1.8267836945380111E0	63.359976006908035E0	34.68389618122337E0	4.9312635197401525E-5	0.005095625017271967E0	2.6486543834286094E0	2.6486543834286094E0	63.359976006908035E0	23.92157180012679E0	0.16217865890272518E0	0.8620384897188644E0	1.4499003857697814E0	1.4499003857697814E0	34.68389618122337E0	23.92157180012679E0
chr19:11484044-11487178	BE692007	ENSMUST00000186054.1	TSS	0.0043452888086198006E0	0.9999999999998793E0	1.5494077484971154E0	1.5494077484971154E0	108.15450758636224E0	69.80377353299623E0	7.195411152213907E-4	0.037525471722641854E0	1.707685753341249E0	1.707685753341249E0	108.15450758636224E0	63.3339637428887E0	0.575144647120432E0	0.8847216405680413E0	1.1021538745999295E0	1.1021538745999295E0	69.80377353299623E0	63.3339637428887E0
chr2:65825624-65827403	.	.	Intergenic	0.004397328623991076E0	0.9999999999998793E0	3.733491946091867E0	3.733491946091867E0	22.127419222697966E0	5.92673549111588E0	0.0039665006743931875E0	0.1254039646098524E0	29.599953562427302E0	29.599953562427302E0	22.127419222697966E0	0.7475491194954239E0	0.09162439888336976E0	0.7737738538576506E0	7.928222154975277E0	7.928222154975277E0	5.92673549111588E0	0.7475491194954239E0
chrX:166349209-166352693	Gpm6b	ENSMUST00000112228.7	Intron 1	0.004489498206302343E0	0.9999999999998793E0	3.1208350239105735E0	3.1208350239105735E0	25.689394023753035E0	8.23157707053763E0	4.3499245204573877E-4	0.026185234810005568E0	10.107301222381745E0	10.107301222381745E0	25.689394023753035E0	2.54166700472586E0	0.1014958141823267E0	0.8035122532871076E0	3.238652842890988E0	3.238652842890988E0	8.23157707053763E0	2.54166700472586E0
chr2:73347947-73349283	Gpr155	ENSMUST00000131430.1	TTS	0.004540649955360429E0	0.9999999999998793E0	2.055892220278078E0	2.055892220278078E0	47.38505871958649E0	23.048415793497785E0	1.142970022643404E-4	0.0096063700174165E0	45.276584034232414E0	45.276584034232414E0	47.38505871958649E0	1.0465687668433625E0	0.001976590041413151E0	0.0821976474700702E0	22.02283932379896E0	22.02283932379896E0	23.048415793497785E0	1.0465687668433625E0
chr6:49582748-49584740	.	.	Intergenic	0.004548661370433538E0	0.9999999999998793E0	0.15610419295164354E0	-6.40597783500774E0	2.6984657598245216E0	17.286311845963205E0	0.45887914126609985E0	0.8565483502551655E0	2.2560940233972295E0	2.2560940233972295E0	2.6984657598245216E0	1.196078590625921E0	0.0047302739952115955E0	0.14867973388271094E0	14.45248830757609E0	14.45248830757609E0	17.286311845963205E0	1.196078590625921E0
chr2:132692349-132693757	1110034G24Rik	ENSMUST00000110132.2	Intron 2	0.0045539851003423785E0	0.9999999999998793E0	4.33189135197693E0	4.33189135197693E0	19.968646615951663E0	4.60968315995244E0	0.7420562926943873E0	0.9326758611821785E0	1.1130063850222243E0	1.1130063850222243E0	19.968646615951663E0	17.94117885096673E0	0.009257854774540584E0	0.22873558979219588E0	0.25693312564598036E0	-3.8920633432758174E0	4.60968315995244E0	17.94117885096673E0
chr15:44596426-44598991	Pkhd1l1	ENSMUST00000038336.11	TTS	0.004569454432306218E0	0.9999999999998793E0	3.4540908236991923E0	3.4540908236991923E0	23.31474415639305E0	6.749893198067067E0	0.0012954686866660289E0	0.05808233318234603E0	17.3268020938494E0	17.3268020938494E0	23.31474415639305E0	1.3455884144177552E0	0.08760424448578474E0	0.7599624178057952E0	5.016313402926993E0	5.016313402926993E0	6.749893198067067E0	1.3455884144177552E0
chr15:60186208-60188060	AC140209.1	ENSMUST00000226854.1	TSS	0.004710185111630148E0	0.9999999999998793E0	1.9742166824390048E0	1.9742166824390048E0	51.352897000405484E0	26.011783537844803E0	0.06876183405257116E0	0.6515518923548516E0	1.4933698644779139E0	1.4933698644779139E0	51.352897000405484E0	34.387259460574825E0	0.28273534066685124E0	0.8620384897188644E0	0.7564366554906026E0	-1.3219877602988837E0	26.011783537844803E0	34.387259460574825E0
chr2:61562504-61564898	.	.	Intergenic	0.004723873215655941E0	0.9999999999998793E0	1.8616031624202223E0	1.8616031624202223E0	59.15036942451224E0	31.773887485027885E0	2.4032339402009443E-5	0.0029095853516419357E0	49.453580967082004E0	49.453580967082004E0	59.15036942451224E0	1.1960785906259195E0	4.2996665276822716E-4	0.02787677000723499E0	26.565049934051824E0	26.565049934051824E0	31.773887485027885E0	1.1960785906259195E0
chr12:107917922-107931777	Bcl11b	ENSMUST00000109891.2	Intron 2	0.0047760438708099985E0	0.9999999999998793E0	1.3124124928464342E0	1.3124124928464342E0	249.12235875661662E0	189.82016714600604E0	1.7260656745487984E-6	3.513129858690614E-4	0.6755106457578648E0	-1.4803615698433383E0	249.12235875661662E0	368.7911660920204E0	1.0548018986857822E-13	4.0637373291761205E-10	0.5147090944652463E0	-1.9428450181921568E0	189.82016714600604E0	368.7911660920204E0
chr1:92191343-92193958	Hdac4	ENSMUST00000212408.1	Intron 1	0.004793236994253581E0	0.9999999999998793E0	3.038628154354553E0	3.038628154354553E0	26.013209914753727E0	8.560840153302436E0	4.289149541430952E-4	0.02601646488012052E0	11.59933140255818E0	11.59933140255818E0	26.013209914753727E0	2.2426473571585888E0	0.07414795058796152E0	0.7084015475843746E0	3.8172921507146507E0	3.8172921507146507E0	8.560840153302436E0	2.2426473571585888E0
chr14:121106098-121107394	Farp1	ENSMUST00000026635.7	Intron 2	0.004810784092352737E0	0.9999999999998793E0	4.903029083592136E0	4.903029083592136E0	18.565444421545642E0	3.786525452943862E0	0.0030451138559906507E0	0.1053513685013725E0	12.41754150132464E0	12.41754150132464E0	18.565444421545642E0	1.4950982382112572E0	0.336015613842889E0	0.8620384897188644E0	2.5326265232404257E0	2.5326265232404257E0	3.786525452943862E0	1.4950982382112572E0
chr15:101486797-101488434	Krt83	ENSMUST00000159029.1	TSS	0.004853562695951681E0	0.9999999999998793E0	0.17769617477657848E0	-5.627583155671883E0	3.1302202813179423E0	17.615574928687355E0	0.8051549186123803E0	0.9554278334129558E0	1.2315619140893581E0	1.2315619140893581E0	3.1302202813179423E0	2.541667004725857E0	0.003911378129071051E0	0.13099660083533632E0	6.930717082896296E0	6.930717082896296E0	17.615574928687355E0	2.541667004725857E0
chr12:55485639-55486929	.	.	Intergenic	0.004941460795554685E0	0.9999999999998793E0	8.304743059451692E0	8.304743059451692E0	16.406671814731663E0	1.9755784974056605E0	0.005027172011478975E0	0.14724304273534386E0	7.838315234019325E0	7.838315234019325E0	16.406671814731663E0	2.093137533372546E0	0.9535313296898222E0	0.9998571342969699E0	0.943835971553446E0	-1.059506132568898E0	1.9755784974056605E0	2.093137533372546E0
chr2:59469779-59471504	.	.	Intergenic	0.005011104268684249E0	0.9999999999998793E0	2.1126100770161007E0	2.1126100770161007E0	43.82308391892032E0	20.74357421451717E0	2.3518509199425743E-6	4.604377754754361E-4	0.4266546369807089E0	-2.343816082901766E0	43.82308391892032E0	102.7132488915192E0	3.034295166880716E-11	4.1432724371762465E-8	0.20195616863824004E0	-4.9515694754106745E0	20.74357421451717E0	102.7132488915192E0
chr7:101726724-101728051	Clpb	ENSMUST00000150355.7	Intron 5	0.005031256764904654E0	0.9999999999998793E0	0.3583135777247669E0	-2.7908515394527824E0	10.146231254670663E0	28.316625116741562E0	0.07584204439353874E0	0.6770925146788218E0	3.084695828228348E0	3.084695828228348E0	10.146231254670663E0	3.289216123619556E0	2.194704999693296E-4	0.016937221535308803E0	8.608928100954662E0	8.608928100954662E0	28.316625116741562E0	3.289216123619556E0
chr5:105144984-105146513	.	.	Intergenic	0.005175342983543891E0	0.9999999999998793E0	4.846017117513428E0	4.846017117513428E0	18.34956716086625E0	3.786525452943863E0	0.42238221784060637E0	0.8565483502551655E0	0.77895090703365E0	-1.2837779518200123E0	18.34956716086625E0	23.556769746560633E0	9.617869589183256E-4	0.04974441712601277E0	0.16074043655738107E0	-6.221209929606109E0	3.786525452943863E0	23.556769746560633E0
chr10:81245969-81250287	Zfr2	ENSMUST00000137999.1	TSS	0.005192940195114008E0	0.9999999999998793E0	0.6953051825400823E0	-1.4382173829724805E0	100.2749875738694E0	144.21723020608843E0	0.24716970288335097E0	0.8565483502551655E0	0.8543842438135705E0	-1.170433569252716E0	100.2749875738694E0	117.3652116128557E0	0.09745910344523548E0	0.7914782704169153E0	1.228790271190475E0	1.228790271190475E0	144.21723020608843E0	117.3652116128557E0
chr17:84113964-84120912	.	.	Intergenic	0.0051931815394535615E0	0.9999999999998793E0	1.3130204845905933E0	1.3130204845905933E0	243.61748861170014E0	185.53974707230967E0	0.05961442913845829E0	0.6111753767775053E0	0.8486673686183082E0	-1.1783179570437265E0	243.61748861170014E0	287.0588614810618E0	3.6088997594724648E-6	6.878142115787513E-4	0.6463473941024821E0	-1.5471556149593515E0	185.53974707230967E0	287.0588614810618E0
chr6:124882664-124889240	Cd4	ENSMUST00000130378.1	TSS	0.005216157944280231E0	0.9999999999998793E0	1.3270661068843854E0	1.3270661068843854E0	226.7790622859437E0	170.8875398968356E0	0.002915231310554821E0	0.10221346741541838E0	1.3543010124638122E0	1.3543010124638122E0	226.7790622859437E0	167.45100254586376E0	0.851797242034871E0	0.9677799761370617E0	1.020522644228604E0	1.020522644228604E0	170.8875398968356E0	167.45100254586376E0
chr14:54208384-54222586	Traj9	ENSMUST00000103731.1	TSS	0.00524875249685211E0	0.9999999999998793E0	1.2415800442401017E0	1.2415800442401017E0	373.0359063276281E0	300.4525628921021E0	0.34947759160101727E0	0.8565483502551655E0	1.072221531026671E0	1.072221531026671E0	373.0359063276281E0	347.90935971080495E0	0.06259339410327067E0	0.6588093669725941E0	0.8635943659056753E0	-1.1579510467871943E0	300.4525628921021E0	347.90935971080495E0
chr5:74348111-74349109	Scfd2	ENSMUST00000113542.8	Intron 5	0.005268493908510134E0	0.9999999999998793E0	2.611050359708079E0	2.611050359708079E0	30.52014842300144E0	11.688839439471268E0	0.04021256407037955E0	0.5040797431757608E0	204.13473594130306E0	204.13473594130306E0	30.52014842300144E0	0.14950982390266598E0	0.09397245724177204E0	0.7830288027222057E0	78.18107957294467E0	78.18107957294467E0	11.688839439471268E0	0.14950982390266598E0
chr16:91445229-91447592	.	.	Intergenic	0.005294569519519971E0	0.9999999999998793E0	0.4839797632186755E0	-2.066202093553594E0	21.911541962024955E0	45.27367387492339E0	1.947640515677077E-7	5.693708004000903E-5	0.2837211944279898E0	-3.5245868819074286E0	21.911541962024955E0	77.22913336171733E0	0.004329832152480679E0	0.1402197489596362E0	0.5862253259126389E0	-1.705828724549207E0	45.27367387492339E0	77.22913336171733E0
chr15:100181254-100182802	Dip2b	ENSMUST00000100203.9	CDS Exon 21	0.005296431815062136E0	0.9999999999998793E0	0.3401120103486578E0	-2.940207842042607E0	8.95890632080176E0	26.341046620546415E0	3.6438848961892507E-6	6.540379291291565E-4	0.18551658602921067E0	-5.390353614218322E0	8.95890632080176E0	48.29167306577713E0	0.012337518686506349E0	0.2740702539681836E0	0.5454573210720571E0	-1.833324004221947E0	26.341046620546415E0	48.29167306577713E0
chr13:45873304-45875626	Atxn1	ENSMUST00000180110.8	5' UTR Exon	0.005309366565760921E0	0.9999999999998793E0	3.1926701011750183E0	3.1926701011750183E0	24.178253199073925E0	7.573050905001256E0	8.238534340171908E-4	0.0416260147483543E0	6.219877675822033E0	6.219877675822033E0	24.178253199073925E0	3.887255418713435E0	0.28514201705277237E0	0.8620384897188644E0	1.9481742487370972E0	1.9481742487370972E0	7.573050905001256E0	3.887255418713435E0
chr4:63899910-63901839	.	.	Intergenic	0.005322991810258807E0	0.9999999999998793E0	3.1570644237307217E0	3.1570644237307217E0	24.428361973611647E0	7.737682446386224E0	0.001276470122519087E0	0.05746939128818926E0	20.423709750400267E0	20.423709750400267E0	24.428361973611647E0	1.1960785906259217E0	0.057394484765817814E0	0.6333826347972457E0	6.469209052840755E0	6.469209052840755E0	7.737682446386224E0	1.1960785906259217E0
chr19:40678475-40679274	Entpd1	ENSMUST00000127828.7	5' UTR Exon	0.005342399985474995E0	0.9999999999998793E0	2.373360496752503E0	2.373360496752503E0	35.042278977128596E0	14.764836199590137E0	8.835256652114442E-5	0.007837875335802148E0	5.2084691888476415E0	5.2084691888476415E0	35.042278977128596E0	6.727942070226894E0	0.0910806170959826E0	0.7733894370273088E0	2.194554597152203E0	2.194554597152203E0	14.764836199590137E0	6.727942070226894E0
chr8:15026065-15029123	Gm37844	ENSMUST00000192473.1	TSS	0.005389079171802628E0	0.9999999999998793E0	1.5273032807734945E0	1.5273032807734945E0	109.12595525912869E0	71.45008894622582E0	9.540488911256354E-4	0.04669515246478932E0	0.6649218848766982E0	-1.5039360603771343E0	109.12595525912869E0	164.11845923730542E0	4.446197731181357E-9	2.635300482723772E-6	0.4353568104299181E0	-2.296966479087562E0	71.45008894622582E0	164.11845923730542E0
chr11:107457990-107459300	Pitpnc1	ENSMUST00000103064.9	Intron 1	0.0054644885472472995E0	0.9999999999998793E0	2.5181276572459326E0	2.5181276572459326E0	31.841895952656973E0	12.6450681962178E0	0.636166006900457E0	0.8941735268137255E0	0.8911099407727282E0	-1.122195987548795E0	31.841895952656973E0	35.73284787401787E0	0.0015003175785281743E0	0.06817344488145313E0	0.3538779847830797E0	-2.825832753097033E0	12.6450681962178E0	35.73284787401787E0
chr11:99150713-99153055	Ccr7	ENSMUST00000103134.3	Intron 1	0.005464649252112527E0	0.9999999999998793E0	3.114278647811029E0	3.114278647811029E0	24.610007720412405E0	7.902313987770601E0	0.025825658012835314E0	0.3967082790199427E0	0.5695661591256568E0	-1.755722287881541E0	24.610007720412405E0	43.20833905966486E0	1.1292544651140501E-5	0.0016641539196072122E0	0.18288863121673288E0	-5.467808432635412E0	7.902313987770601E0	43.20833905966486E0
chr6:15789447-15790415	Mdfic	ENSMUST00000189359.6	Intron 4	0.005502446091885045E0	0.9999999999998793E0	3.215022415829366E0	3.215022415829366E0	23.81823431988874E0	7.408419363615682E0	7.179785219752681E-4	0.03750629399566009E0	10.620588316687561E0	10.620588316687561E0	23.81823431988874E0	2.2426473571585888E0	0.11691545135433755E0	0.8407814859107419E0	3.3034258997375647E0	3.3034258997375647E0	7.408419363615682E0	2.2426473571585888E0
chr14:31661247-31663201	Btd	ENSMUST00000090147.6	CDS Exon 2	0.005534268913104174E0	0.9999999999998793E0	1.68592528319574E0	1.68592528319574E0	75.7729184932238E0	44.944410792388815E0	0.13976689116761998E0	0.8386709343771624E0	1.2928800037484374E0	1.2928800037484374E0	75.7729184932238E0	58.60785090150357E0	0.18064813087121748E0	0.8620384897188644E0	0.7668667269155194E0	-1.3040075477289073E0	44.944410792388815E0	58.60785090150357E0
chr2:145832059-145832665	Rin2	ENSMUST00000147976.7	3' UTR Exon	0.0055906869743980216E0	0.9999999999998793E0	0.2086119669342503E0	-4.793588856363053E0	3.777852063539597E0	18.10946955277158E0	0.07552505178052481E0	0.6757194099338907E0	0.34614045301854046E0	-2.8890006680219966E0	3.777852063539597E0	10.914217135254173E0	0.1863655365239006E0	0.8620384897188644E0	1.6592550183261348E0	1.6592550183261348E0	18.10946955277158E0	10.914217135254173E0
chr14:59049342-59051081	AC129308.2	ENSMUST00000224109.1	TTS	0.00567963072028112E0	0.9999999999998793E0	5.088996687229062E0	5.088996687229062E0	17.5939967484849E0	3.457262370132287E0	0.06638543044096637E0	0.6405214280070075E0	117.67786416455793E0	117.67786416455793E0	17.5939967484849E0	0.14950982390266598E0	0.2344279188349729E0	0.8620384897188644E0	23.12398128689549E0	23.12398128689549E0	3.457262370132287E0	0.14950982390266598E0
chr2:18897485-18898673	Pip4k2a	ENSMUST00000152981.1	Intron 1	0.005705250055173045E0	0.9999999999998793E0	1.96691283034908E0	1.96691283034908E0	49.54383132602874E0	25.188625831087737E0	1.957327052727158E-6	3.924586266892876E-4	5.917412323332685E0	5.917412323332685E0	49.54383132602874E0	8.37255013152872E0	0.0057630004407199596E0	0.1688604898817982E0	3.008477158737373E0	3.008477158737373E0	25.188625831087737E0	8.37255013152872E0
chr3:37227318-37232118	Gm43822	ENSMUST00000200285.1	TSS	0.005759573956574032E0	0.9999999999998793E0	1.4451251130306668E0	1.4451251130306668E0	137.51381502936596E0	95.15703089608398E0	7.096563255940055E-13	1.7802966700186548E-9	29.669819711919633E0	29.669819711919633E0	137.51381502936596E0	4.634804537559114E0	2.1216360862209068E-10	1.9901499959035466E-7	20.530969564079545E0	20.530969564079545E0	95.15703089608398E0	4.634804537559114E0
chr1:73928416-73930086	Tns1	ENSMUST00000191527.6	TSS	0.005913389425653339E0	0.9999999999998793E0	0.21052583819020204E0	-4.750010775858012E0	3.7778520635395716E0	17.944838011410393E0	0.5677340066589242E0	0.8680136059037894E0	0.6829257585798274E0	-1.4642880099874132E0	3.7778520635395716E0	5.5318634801472015E0	0.01553035439640755E0	0.31349391997390225E0	3.2439047123651874E0	3.2439047123651874E0	17.944838011410393E0	5.5318634801472015E0
chr9:15506846-15512589	Smco4	ENSMUST00000045620.9	5' UTR Exon	0.005931527474991142E0	0.9999999999998793E0	0.6310950259016049E0	-1.584547427816222E0	58.28686038196364E0	92.3582946937237E0	2.783369138501401E-7	7.582080279736404E-5	5.73313304685816E0	5.73313304685816E0	58.28686038196364E0	10.166668016522955E0	2.4394605637405542E-11	3.462525386741905E-8	9.084421222727276E0	9.084421222727276E0	92.3582946937237E0	10.166668016522955E0
chr19:57610126-57611770	Atrnl1	ENSMUST00000077282.5	TSS	0.005953177983061704E0	0.9999999999998793E0	0.535015854070145E0	-1.8691034899105847E0	29.683123346049065E0	55.48082943754666E0	0.009608216568612715E0	0.22221233805292712E0	0.5530258331712935E0	-1.808233793104311E0	29.683123346049065E0	53.67402671920944E0	0.8627071046200978E0	0.9677799761370617E0	1.0336625147911735E0	1.0336625147911735E0	55.48082943754666E0	53.67402671920944E0
chr5:140213063-140217104	Mad1l1	ENSMUST00000132832.1	Intron 2	0.005966110746009254E0	0.9999999999998793E0	0.5549062253969844E0	-1.8021062915352803E0	33.89272992923014E0	61.07830184277174E0	4.0932561293871544E-5	0.004446644697335151E0	0.4305056349105225E0	-2.3228499673595278E0	33.89272992923014E0	78.72772660983753E0	0.1365737743796055E0	0.8620384897188644E0	0.7758169132136431E0	-1.288963907550984E0	61.07830184277174E0	78.72772660983753E0
chr14:7104892-7106042	.	.	Intergenic	0.0059700742399433635E0	0.9999999999998793E0	0.19356919925300278E0	-5.166111157452067E0	3.346097542060788E0	17.286311845963173E0	0.5005807364263032E0	0.8602291146233343E0	1.865037726089866E0	1.865037726089866E0	3.346097542060788E0	1.7941178857952806E0	0.0038753072511986193E0	0.13023084707431423E0	9.63499220582189E0	9.63499220582189E0	17.286311845963173E0	1.7941178857952806E0
chr2:174726426-174728707	.	.	Intergenic	0.005994670225767293E0	0.9999999999998793E0	4.731993185355667E0	4.731993185355667E0	17.917812639506135E0	3.786525452943862E0	0.0032953646736337866E0	0.11101838645811912E0	9.986976207844716E0	9.986976207844716E0	17.917812639506135E0	1.794117885795281E0	0.40987709761260416E0	0.8620384897188644E0	2.110522102768851E0	2.110522102768851E0	3.786525452943862E0	1.794117885795281E0
chr3:52395557-52398494	.	.	Intergenic	0.0060386021768621114E0	0.9999999999998793E0	0.5674427032943286E0	-1.762292464409939E0	36.80707294801264E0	64.86482729326958E0	4.658687143804438E-6	7.93912414318509E-4	0.40826696502283416E0	-2.4493777005545145E0	36.80707294801264E0	90.15442370154547E0	0.04317486517392801E0	0.553576678298422E0	0.7194857959272567E0	-1.3898815037915002E0	64.86482729326958E0	90.15442370154547E0
chr10:19405892-19407546	.	.	Intergenic	0.006107647897695776E0	0.9999999999998793E0	5.0265550100956125E0	5.0265550100956125E0	17.378119487803538E0	3.4572623701322986E0	0.007733173186703351E0	0.1927450534124886E0	23.246792798757212E0	23.246792798757212E0	17.378119487803538E0	0.7475491194954249E0	0.22989064717191993E0	0.8620384897188644E0	4.6247962574898835E0	4.6247962574898835E0	3.4572623701322986E0	0.7475491194954249E0
chr14:31666106-31667778	Btd	ENSMUST00000128014.1	TTS	0.006146413001236503E0	0.9999999999998793E0	4.144566320571027E0	4.144566320571027E0	19.1051375732423E0	4.6096831599524375E0	0.0036550641102496956E0	0.11893898363950692E0	5.324381894509741E0	5.324381894509741E0	19.1051375732423E0	3.5882357711686015E0	0.7219767637834512E0	0.9287381926771259E0	1.2846656278807385E0	1.2846656278807385E0	4.6096831599524375E0	3.5882357711686015E0
chr1:165792647-165794634	Cd247	ENSMUST00000005907.11	Intron 1	0.006197830671271555E0	0.9999999999998793E0	2.051995573631945E0	2.051995573631945E0	44.254838440215764E0	21.56673192130068E0	0.20882063164653158E0	0.8565483502551655E0	1.3346542474054597E0	1.3346542474054597E0	44.254838440215764E0	33.15827940175986E0	0.11997040126441869E0	0.8487943264640019E0	0.6504177029208588E0	-1.5374735274105502E0	21.56673192130068E0	33.15827940175986E0
chr5:122223985-122225103	Hvcn1	ENSMUST00000145854.7	Intron 3	0.006240521767204281E0	0.9999999999998793E0	2.434101264500384E0	2.434101264500384E0	32.45911729044497E0	13.33515485318456E0	7.748474205071927E-5	0.007095510678469643E0	10.338265490649423E0	10.338265490649423E0	32.45911729044497E0	3.139706299843338E0	0.021135192170504722E0	0.3764421654153456E0	4.247261870911284E0	4.247261870911284E0	13.33515485318456E0	3.139706299843338E0
chr8:94826995-94828845	Ciapin1	ENSMUST00000160898.1	TSS	0.006250634629990089E0	0.9999999999998793E0	0.21654086213746457E0	-4.618066032106123E0	3.885790693907938E0	17.94483801141033E0	0.5549799871342629E0	0.8680136059037894E0	1.6243876969556592E0	1.6243876969556592E0	3.885790693907938E0	2.3921571809429976E0	0.003416093984073761E0	0.11929566408028126E0	7.501529646282023E0	7.501529646282023E0	17.94483801141033E0	2.3921571809429976E0
chr9:123941427-123942169	.	.	Intergenic	0.006325544845148458E0	0.9999999999998793E0	6.46895775184718E0	6.46895775184718E0	15.9749172933633E0	2.469473121663492E0	0.074964129886765E0	0.673266637521855E0	2.226012769783885E0	2.226012769783885E0	15.9749172933633E0	7.1764715414971505E0	0.14817917449312623E0	0.8620384897188644E0	0.3441068646874773E0	-2.9060739631225143E0	2.469473121663492E0	7.1764715414971505E0
chr18:65414801-65416973	.	.	Intergenic	0.006326181156446053E0	0.9999999999998793E0	1.7974065214195192E0	1.7974065214195192E0	60.66151024896765E0	33.74946598116248E0	0.1496591756373737E0	0.8550119836130965E0	1.3259344745394783E0	1.3259344745394783E0	60.66151024896765E0	45.75000606273286E0	0.1800073588749627E0	0.8620384897188644E0	0.7376931477317157E0	-1.355577184192146E0	33.74946598116248E0	45.75000606273286E0
chr10:95922870-95924372	.	.	Intergenic	0.006331774289117027E0	0.9999999999998793E0	2.1023751464651763E0	2.1023751464651763E0	41.88018857308208E0	19.920416507728053E0	0.0011043264013710504E0	0.05179434865004318E0	70.0291584464708E0	70.0291584464708E0	41.88018857308208E0	0.5980392953757204E0	0.00755541814328736E0	0.20089367053754928E0	33.30954447602473E0	33.30954447602473E0	19.920416507728053E0	0.5980392953757204E0
chr15:80734408-80736846	Tnrc6b	ENSMUST00000067689.8	5' UTR Exon	0.006341120189538542E0	0.9999999999998793E0	1.7747957632295046E0	1.7747957632295046E0	62.820282855321544E0	35.3957813945931E0	2.849893790607503E-4	0.019251912702350684E0	2.2960379831766855E0	2.2960379831766855E0	62.820282855321544E0	27.360297745774435E0	0.31175840640161995E0	0.8620384897188644E0	1.293691381705072E0	1.293691381705072E0	35.3957813945931E0	27.360297745774435E0
chr15:5241916-5245241	Ptger4	ENSMUST00000133966.1	TSS	0.0063576133824526275E0	0.9999999999998793E0	1.5569230847694289E0	1.5569230847694289E0	97.14476729490575E0	62.395354173383794E0	0.013643271394758625E0	0.27473224102422944E0	1.4834590839997965E0	1.4834590839997965E0	97.14476729490575E0	65.48530279175469E0	0.784687411881475E0	0.9508179086825141E0	0.9528146242493978E0	-1.0495220943819723E0	62.395354173383794E0	65.48530279175469E0
chr13:51791002-51793757	Sema4d	ENSMUST00000021900.13	TSS	0.006414857093549173E0	0.9999999999998793E0	0.7037191666742021E0	-1.4210214064880882E0	102.53111840017725E0	145.69891407781657E0	0.013135886158549352E0	0.2686270042807951E0	0.7249279238143072E0	-1.3794474831902785E0	102.53111840017725E0	141.43629322580895E0	0.8013924455005941E0	0.9545174889535161E0	1.0301380979010963E0	1.0301380979010963E0	145.69891407781657E0	141.43629322580895E0
chr7:92180295-92182372	Dlg2	ENSMUST00000129818.1	TSS	0.006424047608077653E0	0.9999999999998793E0	3.5513703877759117E0	3.5513703877759117E0	21.048032919329476E0	5.926735491115885E0	0.003424157947366278E0	0.1138989177478392E0	23.463377831863074E0	23.463377831863074E0	21.048032919329476E0	0.8970589430966934E0	0.0955945666906623E0	0.7868207456601425E0	6.606851798006148E0	6.606851798006148E0	5.926735491115885E0	0.8970589430966934E0
chr14:27227529-27232837	Arhgef3	ENSMUST00000225949.1	Intron 4	0.00645133857461476E0	0.9999999999998793E0	1.4077803010121153E0	1.4077803010121153E0	152.7331619019687E0	108.4921857424501E0	0.09589276185468158E0	0.7424861623215234E0	0.8332458189057591E0	-1.2001260340114601E0	152.7331619019687E0	183.29904385543998E0	1.4957980291166639E-5	0.002066020752815645E0	0.5918862611635508E0	-1.6895137894131296E0	108.4921857424501E0	183.29904385543998E0
chr15:77796896-77808461	Myh9	ENSMUST00000134878.1	TTS	0.006464457759974776E0	0.9999999999998793E0	1.218124207369797E0	1.218124207369797E0	422.5412897612682E0	346.8786575333147E0	0.12812836712366593E0	0.8182185358082227E0	0.9029320873853247E0	-1.1075030049001369E0	422.5412897612682E0	467.96574810498396E0	2.3799062139514322E-5	0.003027448384641307E0	0.7412479629929999E0	-1.3490762200036477E0	346.8786575333147E0	467.96574810498396E0
chr5:88752762-88754344	Mob1b	ENSMUST00000006424.7	CDS Exon 5	0.006490388812091653E0	0.9999999999998793E0	0.17218765525289748E0	-5.80761726809781E0	2.806404390198845E0	16.298522597784316E0	0.2541584494024933E0	0.8565483502551655E0	6.256900757219487E0	6.256900757219487E0	2.806404390198845E0	0.44852947155357903E0	0.01760899427394139E0	0.3376350940833415E0	36.33768488240216E0	36.33768488240216E0	16.298522597784316E0	0.44852947155357903E0
chr2:102980765-102982293	.	.	Intergenic	0.006527740256741181E0	0.9999999999998793E0	2.2643154575645124E0	2.2643154575645124E0	36.15944116580017E0	15.969259515055866E0	7.183286872425871E-5	0.006708941167006054E0	18.60409840191294E0	18.60409840191294E0	36.15944116580017E0	1.9436277095847936E0	0.005566437916352469E0	0.16492728010979416E0	8.216213133978878E0	8.216213133978878E0	15.969259515055866E0	1.9436277095847936E0
chr17:8238353-8240119	Ccr6	ENSMUST00000164411.8	5' UTR Exon	0.006550081238810634E0	0.9999999999998793E0	0.16725449244624058E0	-5.9789126460768935E0	2.698465759824517E0	16.133891056420296E0	0.3546328572448397E0	0.8565483502551655E0	0.5013542275550207E0	-1.9945977216084327E0	2.698465759824517E0	5.382353656384351E0	0.02742586747882561E0	0.434563837036333E0	2.9975531312928254E0	2.9975531312928254E0	16.133891056420296E0	5.382353656384351E0
chr10:96726248-96727787	.	.	Intergenic	0.006563456764584126E0	0.9999999999998793E0	2.132247532001528E0	2.132247532001528E0	40.3690477485306E0	18.932627259573565E0	0.014747541722763767E0	0.28752242332544653E0	1.928638090932819E0	1.928638090932819E0	40.3690477485306E0	20.93137532558294E0	0.7516725522615946E0	0.937997261034357E0	0.9045094727451356E0	-1.1055716165857898E0	18.932627259573565E0	20.93137532558294E0
chr18:78141173-78143417	Slc14a1	ENSMUST00000160639.1	TSS	0.006572874710098545E0	0.9999999999998793E0	0.6021149420378465E0	-1.6608124631744217E0	45.98185652551827E0	76.36724039747884E0	0.001481114055893413E0	0.0636224649148308E0	0.557157132874346E0	-1.7948258058566884E0	45.98185652551827E0	82.52942269319995E0	0.625034440704414E0	0.896125467039406E0	0.925333510224241E0	-1.080691436061431E0	76.36724039747884E0	82.52942269319995E0
chr16:93584505-93586768	Setd4	ENSMUST00000140619.1	CDS Exon 4	0.006585090362121811E0	0.9999999999998793E0	0.6038030128571713E0	-1.6561692782353648E0	46.52154967712845E0	77.04756135116047E0	0.0530100955867161E0	0.5772506149367495E0	0.691467750607742E0	-1.4461990441652326E0	46.52154967712845E0	67.27942067614855E0	0.4165255434438289E0	0.8620384897188644E0	1.145187645447055E0	1.145187645447055E0	77.04756135116047E0	67.27942067614855E0
chr1:92972078-92974009	Gpr35	ENSMUST00000027489.8	TSS	0.00661451098708663E0	0.9999999999998793E0	0.11984773523924355E0	-8.343920709087833E0	1.8349567168009724E0	15.310733349595452E0	0.9828970070165548E0	0.9998888456104917E0	1.0227626240889902E0	1.0227626240889902E0	1.8349567168009724E0	1.7941178857952806E0	0.006587871263265966E0	0.18458530825514013E0	8.533850239617141E0	8.533850239617141E0	15.310733349595452E0	1.7941178857952806E0
chr8:117853824-117856055	.	.	Intergenic	0.00661998820001641E0	0.9999999999998793E0	3.7152797902603334E0	3.7152797902603334E0	20.18452387662796E0	5.432840866936056E0	0.002135670274536768E0	0.08191606758221884E0	13.500466632063457E0	13.500466632063457E0	20.18452387662796E0	1.4950982382112585E0	0.16238671802296128E0	0.8620384897188644E0	3.633768489645154E0	3.633768489645154E0	5.432840866936056E0	1.4950982382112585E0
chr9:120776025-120776576	.	.	Intergenic	0.006668630375959445E0	0.9999999999998793E0	0.19732782448057537E0	-5.067709040183729E0	3.346097542060789E0	16.957048763238017E0	0.44234800815928826E0	0.8565483502551655E0	0.5889592820380816E0	-1.6979102469351028E0	3.346097542060789E0	5.681373303909375E0	0.024087526015911825E0	0.40341463963895186E0	2.9846742778845043E0	2.9846742778845043E0	16.957048763238017E0	5.681373303909375E0
chr16:97401179-97402562	Bace2	ENSMUST00000047275.6	Intron 2	0.006706749390332692E0	0.9999999999998793E0	0.13949736391688122E0	-7.168594243801229E0	2.1587726079409264E0	15.47536489096109E0	0.33828464783286705E0	0.8565483502551655E0	4.813000582689772E0	4.813000582689772E0	2.1587726079409264E0	0.44852947155358214E0	0.019395790803144394E0	0.3584516260592077E0	34.50244827248185E0	34.50244827248185E0	15.47536489096109E0	0.44852947155358214E0
chr14:121915568-121917567	Gpr18	ENSMUST00000055475.8	TSS	0.0067142871163620365E0	0.9999999999998793E0	1.9254167790828218E0	1.9254167790828218E0	50.08352447763675E0	26.011783537844824E0	0.0018003591499923463E0	0.0729242932854569E0	0.5749223553652747E0	-1.7393653084939684E0	50.08352447763675E0	87.11354500350988E0	6.336317415806895E-8	2.458696289911285E-5	0.2985963151516425E0	-3.3490031499288557E0	26.011783537844824E0	87.11354500350988E0
chr13:45916850-45917962	Atxn1	ENSMUST00000180110.8	5' UTR Exon	0.006783601267957834E0	0.9999999999998793E0	2.7780038486018572E0	2.7780038486018572E0	26.526129226474104E0	9.548629401584325E0	6.231662632890294E-4	0.03393846979570217E0	17.74206439986851E0	17.74206439986851E0	26.526129226474104E0	1.4950982382112585E0	0.03501867593417536E0	0.4978346901749223E0	6.386623405434778E0	6.386623405434778E0	9.548629401584325E0	1.4950982382112585E0
chr6:124899999-124902568	.	.	Intergenic	0.006829320845399085E0	0.9999999999998793E0	1.6746998131468231E0	1.6746998131468231E0	73.614145886942E0	43.95662154438191E0	0.08842680493367648E0	0.7184108445150653E0	1.35639107359221E0	1.35639107359221E0	73.614145886942E0	54.27206601410709E0	0.29886305572278227E0	0.8620384897188644E0	0.8099308681736226E0	-1.2346732780477665E0	43.95662154438191E0	54.27206601410709E0
chrX:7583117-7584391	Foxp3	ENSMUST00000115738.7	5' UTR Exon	0.0069288327409053685E0	0.9999999999998793E0	0.12115042801336227E0	-8.254201131585809E0	1.8349567168009764E0	15.146101808229602E0	0.5632566052572293E0	0.8680136059037894E0	0.5844357852492555E0	-1.71105196710963E0	1.8349567168009764E0	3.1397062998433394E0	0.011160645842375671E0	0.2576358546874793E0	4.824050519943646E0	4.824050519943646E0	15.146101808229602E0	3.1397062998433394E0
chr2:98666430-98667171	Gm10800	ENSMUST00000099683.1	TTS	0.006970871550080502E0	0.9999999999998793E0	0.6587157210839527E0	-1.5181055620692419E0	69.29660067434716E0	105.19955491621761E0	0.04184614367960516E0	0.5136628421882166E0	0.7253395246656178E0	-1.3786647025212102E0	69.29660067434716E0	95.53677735442993E0	0.4954026095654937E0	0.8692466617758743E0	1.1011419667835345E0	1.1011419667835345E0	105.19955491621761E0	95.53677735442993E0
chr18:75366515-75369553	Smad7	ENSMUST00000174411.1	TSS	0.0070443203809026625E0	0.9999999999998793E0	1.5531949801760445E0	1.5531949801760445E0	95.63362647057228E0	61.572196466751926E0	4.149128643024314E-17	3.7298246175746823E-13	0.36599772795254415E0	-2.7322573984111225E0	95.63362647057228E0	261.2956834611069E0	1.967082601042254E-24	5.3048775355557767E-20	0.23564184318382272E0	-4.2437284757610145E0	61.572196466751926E0	261.2956834611069E0
chr4:156030069-156034163	Gm16008	ENSMUST00000126009.1	TSS	0.007081584168270915E0	0.9999999999998793E0	1.4708972541558418E0	1.4708972541558418E0	120.35157281099188E0	81.82187604943384E0	0.7319733878517205E0	0.9288666258982042E0	0.9572621745448654E0	-1.0446458938748462E0	120.35157281099188E0	125.72477635838226E0	0.002494053374000397E0	0.09702164428905331E0	0.6508015239271385E0	-1.536566776865686E0	81.82187604943384E0	125.72477635838226E0
chr2:145831052-145832031	Rin2	ENSMUST00000147976.7	3' UTR Exon	0.007225289298630936E0	0.9999999999998793E0	0.17573791618534382E0	-5.690291666741625E0	2.806404390198894E0	15.96925951505588E0	0.9608074973886355E0	0.9998888456104917E0	1.0428167931854426E0	1.0428167931854426E0	2.806404390198894E0	2.691176828507244E0	0.006886460762147614E0	0.18950094124588482E0	5.9339317082013485E0	5.9339317082013485E0	15.96925951505588E0	2.691176828507244E0
chr5:121117546-121119401	.	.	Intergenic	0.007234726099516153E0	0.9999999999998793E0	2.1151439421755147E0	2.1151439421755147E0	40.04523185755404E0	18.932627259573565E0	3.1502741271031E-5	0.0036441083414036493E0	19.131677311730016E0	19.131677311730016E0	40.04523185755404E0	2.0931375333725453E0	0.002500486418858259E0	0.09720179151765657E0	9.045094723932728E0	9.045094723932728E0	18.932627259573565E0	2.0931375333725453E0
chr12:107968732-107980333	Bcl11b	ENSMUST00000109891.2	Intron 2	0.007319643886592479E0	0.9999999999998793E0	1.250460041753403E0	1.250460041753403E0	324.03176817771094E0	259.13004602958085E0	0.0038308102918860483E0	0.12309830164331954E0	1.2741294314354052E0	1.2741294314354052E0	324.03176817771094E0	254.31621009858011E0	0.8317637766861431E0	0.9677799761370617E0	1.0189285454086263E0	1.0189285454086263E0	259.13004602958085E0	254.31621009858011E0
chr3:138858845-138861249	Tspan5	ENSMUST00000121826.2	TSS	0.007368036483203925E0	0.9999999999998793E0	0.32549384909281515E0	-3.072254676354416E0	7.555704126194721E0	23.21304733485209E0	0.20804666505761316E0	0.8565483502551655E0	2.2971139147524866E0	2.2971139147524866E0	7.555704126194721E0	3.289216123619558E0	9.111063129150688E-4	0.047873244662974775E0	7.057318966717126E0	7.057318966717126E0	23.21304733485209E0	3.289216123619558E0
chr17:65938448-65940638	Twsg1	ENSMUST00000024906.4	Intron 2	0.007368785646771634E0	0.9999999999998793E0	2.088123144803281E0	2.088123144803281E0	40.90874090015718E0	19.59115342501083E0	2.733453197628573E-5	0.0032367266387243365E0	19.544220218651077E0	19.544220218651077E0	40.90874090015718E0	2.093137533372547E0	0.002102423027384009E0	0.08592684433228709E0	9.359706714276333E0	9.359706714276333E0	19.59115342501083E0	2.093137533372547E0
chr2:58155990-58160907	Cytip	ENSMUST00000151169.1	TSS	0.00744450927854822E0	0.9999999999998793E0	1.346194154880417E0	1.346194154880417E0	190.15512400146537E0	141.25386246262292E0	0.38805428072239334E0	0.8565483502551655E0	0.9169841778004031E0	-1.0905313572571442E0	190.15512400146537E0	207.37012546671858E0	4.3275860576346434E-4	0.028037819266980294E0	0.6811678497310509E0	-1.4680669388533754E0	141.25386246262292E0	207.37012546671858E0
chr3:89895229-89899910	Il6ra	ENSMUST00000029559.6	Intron 1	0.007453824311534634E0	0.9999999999998793E0	1.5320342130698406E0	1.5320342130698406E0	99.62735579201637E0	65.02945883459505E0	0.060514257204470186E0	0.6147869580909148E0	1.3327198616354294E0	1.3327198616354294E0	99.62735579201637E0	74.75491186104182E0	0.41112465088765965E0	0.8620384897188644E0	0.8699021537939212E0	-1.149554574199731E0	65.02945883459505E0	74.75491186104182E0
chr13:45854132-45857615	Atxn1	ENSMUST00000180110.8	5' UTR Exon	0.007483198396801305E0	0.9999999999998793E0	2.970439784402014E0	2.970439784402014E0	23.962375938404175E0	8.066945529154395E0	7.190144914443336E-4	0.037525471722641854E0	11.448065670006425E0	11.448065670006425E0	23.962375938404175E0	2.093137533372546E0	0.08200055783472082E0	0.7407824796885654E0	3.853996882926567E0	3.853996882926567E0	8.066945529154395E0	2.093137533372546E0
chr3:146185487-146186840	Mcoln2	ENSMUST00000011152.13	Intron 11	0.007493017457138103E0	0.9999999999998793E0	2.4651974139435073E0	2.4651974139435073E0	30.43869375836485E0	12.347365604960991E0	0.005048699046605985E0	0.14755305127459425E0	67.86330818559978E0	67.86330818559978E0	30.43869375836485E0	0.4485294715535806E0	0.02918407539687639E0	0.44920643343482797E0	27.528549154625605E0	27.528549154625605E0	12.347365604960991E0	0.4485294715535806E0
chr11:70594263-70596866	Mink1	ENSMUST00000072873.13	Intron 1	0.007512792001820551E0	0.9999999999998793E0	1.6368175058621075E0	1.6368175058621075E0	77.60787520852875E0	47.413883912277E0	1.8825196552449985E-5	0.0023723486304935014E0	2.4718195852452554E0	2.4718195852452554E0	77.60787520852875E0	31.39706298622456E0	0.07321878757098331E0	0.7034494363773319E0	1.510137554365509E0	1.510137554365509E0	47.413883912277E0	31.39706298622456E0
chr1:171975880-171977721	.	.	Intergenic	0.007537223256276385E0	0.9999999999998793E0	3.58672339615501E0	3.58672339615501E0	20.076585246289863E0	5.5974724083301455E0	0.0020372552072968624E0	0.07941915454183837E0	12.207519657799592E0	12.207519657799592E0	20.076585246289863E0	1.644608062004028E0	0.1673095360288851E0	0.8620384897188644E0	3.4035297148606802E0	3.4035297148606802E0	5.5974724083301455E0	1.644608062004028E0
chr17:47599394-47601863	Ccnd3	ENSMUST00000182209.7	TTS	0.007564784041192293E0	0.9999999999998793E0	1.704115937071847E0	1.704115937071847E0	67.89339848024444E0	39.840833010988966E0	0.012976951008957531E0	0.2669455827973447E0	0.676760961441774E0	-1.4776266022638131E0	67.89339848024444E0	100.32109171250674E0	8.175017496666412E-7	2.0272727871675767E-4	0.3971331684184825E0	-2.5180470419590875E0	39.840833010988966E0	100.32109171250674E0
chr15:72809284-72811086	Peg13	ENSMUST00000202826.1	TSS	0.007575782515979895E0	0.9999999999998793E0	2.089150350857971E0	2.089150350857971E0	40.58492500918135E0	19.426521883651862E0	0.7036184382741387E0	0.9172058313379831E0	1.0901736262320305E0	1.0901736262320305E0	40.58492500918135E0	37.227946111166816E0	0.020135213851514996E0	0.36610361097268396E0	0.5218263136419639E0	-1.916346442977809E0	19.426521883651862E0	37.227946111166816E0
chr1:52948050-52950400	1700019D03Rik	ENSMUST00000114492.7	5' UTR Exon	0.00758991551764353E0	0.9999999999998793E0	3.2001359538763325E0	3.2001359538763325E0	22.127419222697977E0	6.914524739455203E0	0.001149838298660907E0	0.05346401154803794E0	11.384597530473E0	11.384597530473E0	22.127419222697977E0	1.9436277095847971E0	0.11802004152693303E0	0.8445040413663385E0	3.5575355842875394E0	3.5575355842875394E0	6.914524739455203E0	1.9436277095847971E0
chr15:73109321-73111496	Ago2	ENSMUST00000044113.10	Intron 16	0.007593949851092086E0	0.9999999999998793E0	0.2825105150207648E0	-3.5396912568953374E0	5.720747410101917E0	20.249679590444398E0	0.5566365005748904E0	0.8680136059037894E0	1.4716674861553898E0	1.4716674861553898E0	5.720747410101917E0	3.8872554187134343E0	0.0028785372578017344E0	0.1064871226374648E0	5.2092485338013725E0	5.2092485338013725E0	20.249679590444398E0	3.8872554187134343E0
chr1:85957892-85960860	Gpr55	ENSMUST00000086975.5	5' UTR Exon	0.007619758491084257E0	0.9999999999998793E0	1.8940642070148872E0	1.8940642070148872E0	50.51527899892248E0	26.670309703247266E0	1.3844957462200654E-6	2.888775814932246E-4	6.143138925289069E0	6.143138925289069E0	50.51527899892248E0	8.223040307776445E0	0.0031805879414666762E0	0.11425279996648553E0	3.2433636106617922E0	3.2433636106617922E0	26.670309703247266E0	8.223040307776445E0
chr10:6991229-6992263	Oprm1	ENSMUST00000129954.7	3' UTR Exon	0.007629253450491937E0	0.9999999999998793E0	2.435225408915783E0	2.435225408915783E0	30.8704482796866E0	12.67662868770362E0	0.016523566051884826E0	0.30822617659250245E0	2.1508096356820463E0	2.1508096356820463E0	30.8704482796866E0	14.352943081314226E0	0.7472842792684242E0	0.9356381017834772E0	0.8832076192238957E0	-1.132236609189053E0	12.67662868770362E0	14.352943081314226E0
chr1:171965810-171967011	.	.	Intergenic	0.0076458564202009985E0	0.9999999999998793E0	2.1177675016768522E0	2.1177675016768522E0	39.39760007559964E0	18.603364176853475E0	0.018312787683189693E0	0.3261441878403041E0	1.8957682154224809E0	1.8957682154224809E0	39.39760007559964E0	20.78186550185393E0	0.7286281946552708E0	0.9295915344107447E0	0.8951729658337887E0	-1.1171025468453155E0	18.603364176853475E0	20.78186550185393E0
chr9:123940289-123940891	.	.	Intergenic	0.007700477640083953E0	0.9999999999998793E0	6.58016331466226E0	6.58016331466226E0	15.16623401244415E0	2.3048415802461872E0	0.04591929341490092E0	0.5372507525537534E0	2.6694662014214403E0	2.6694662014214403E0	15.16623401244415E0	5.68137330390938E0	0.24799682919638166E0	0.8620384897188644E0	0.4056838825676557E0	-2.4649734509312937E0	2.3048415802461872E0	5.68137330390938E0
chr16:90330278-90332097	.	.	Intergenic	0.0077225021083949874E0	0.9999999999998793E0	1.9715627424767743E0	1.9715627424767743E0	45.76597926474408E0	23.213047334852046E0	5.4816130594433584E-6	9.111217959342579E-4	16.110886157716294E0	16.110886157716294E0	45.76597926474408E0	2.8406866522872494E0	8.322157858125053E-4	0.04495423808860911E0	8.171632487575314E0	8.171632487575314E0	23.213047334852046E0	2.8406866522872494E0
chr6:48505326-48507672	Zfp862-ps	ENSMUST00000203457.1	TSS	0.007883598507379696E0	0.9999999999998793E0	3.184525534591764E0	3.184525534591764E0	22.019480592361532E0	6.914524739455195E0	0.001240227504287463E0	0.056347867341551415E0	12.273151483912072E0	12.273151483912072E0	22.019480592361532E0	1.7941178857952802E0	0.10735785518686203E0	0.8172713356383702E0	3.853996882925108E0	3.853996882925108E0	6.914524739455195E0	1.7941178857952802E0
chr15:36360624-36361741	AC147366.2	ENSMUST00000228118.1	Intron 1	0.007967576539212366E0	0.9999999999998793E0	2.0804232658061417E0	2.0804232658061417E0	40.41538810044151E0	19.426521883651873E0	1.0059884300293071E-5	0.0014625200796839818E0	9.654260042831513E0	9.654260042831513E0	40.41538810044151E0	4.18627506625438E0	0.004395187572749321E0	0.14152897583139926E0	4.6405268588892605E0	4.6405268588892605E0	19.426521883651873E0	4.18627506625438E0
chr6:99376138-99377177	Foxp1	ENSMUST00000177227.7	5' UTR Exon	0.007994417693757798E0	0.9999999999998793E0	5.592203144123244E0	5.592203144123244E0	15.65110140233578E0	2.798736204492727E0	0.04515147052489992E0	0.5328348410935734E0	0.5340957281243255E0	-1.8723235317980722E0	15.65110140233578E0	29.303925454151084E0	1.7425590873821129E-4	0.014251332557480716E0	0.09550721144413328E0	-10.470413541337113E0	2.798736204492727E0	29.303925454151084E0
chr10:68799735-68801550	.	.	Intergenic	0.008070856615306418E0	0.9999999999998793E0	3.7434792573543065E0	3.7434792573543065E0	19.10513757324229E0	5.103577784145329E0	0.005980677211137091E0	0.1646219935690205E0	25.557033076485652E0	25.557033076485652E0	19.10513757324229E0	0.7475491194954246E0	0.12087474260428833E0	0.8505068885886371E0	6.82708018917888E0	6.82708018917888E0	5.103577784145329E0	0.7475491194954246E0
chr19:30124264-30126326	Gldc	ENSMUST00000025778.7	CDS Exon 16	0.008075716670437761E0	0.9999999999998793E0	3.442097452785594E0	3.442097452785594E0	20.400401137303945E0	5.926735491115879E0	0.0071370455934934E0	0.1834387506484586E0	34.11214161853245E0	34.11214161853245E0	20.400401137303945E0	0.5980392953757208E0	0.09094502096780199E0	0.7725231523095873E0	9.91027769737502E0	9.91027769737502E0	5.926735491115879E0	0.5980392953757208E0
chr8:88287869-88297326	Adcy7	ENSMUST00000171456.8	TSS	0.008108034159733005E0	0.9999999999998793E0	1.256843204846269E0	1.256843204846269E0	302.7181577529706E0	240.85594494660745E0	0.4340436264095965E0	0.8565483502551655E0	1.0667742751992475E0	1.0667742751992475E0	302.7181577529706E0	283.7696453604772E0	0.061281687429156566E0	0.6521537733608886E0	0.8487727594706058E0	-1.1781716470539385E0	240.85594494660745E0	283.7696453604772E0
chr1:60862248-60864811	.	.	Intergenic	0.008115310729470256E0	0.9999999999998793E0	3.099377793039323E0	3.099377793039323E0	22.45123511370676E0	7.243787822229489E0	0.0023086588589659365E0	0.0868044465295338E0	4.550473278222515E0	4.550473278222515E0	22.45123511370676E0	4.933824185091481E0	0.5106051263057512E0	0.8721782434142846E0	1.4681892889734531E0	1.4681892889734531E0	7.243787822229489E0	4.933824185091481E0
chr9:15714823-15717091	Slc36a4	ENSMUST00000115588.7	Intron 1	0.008124989889084932E0	0.9999999999998793E0	0.2994250503845405E0	-3.3397339291276302E0	6.26044056190299E0	20.90820575587426E0	0.34461685472951337E0	0.8565483502551655E0	1.9033229579982165E0	1.9033229579982165E0	6.26044056190299E0	3.2892161236195503E0	0.0018214994975840491E0	0.07786143730953729E0	6.356592260914207E0	6.356592260914207E0	20.90820575587426E0	3.2892161236195503E0
chr6:146745210-146747969	Stk38l	ENSMUST00000001675.13	5' UTR Exon	0.008136103407010263E0	0.9999999999998793E0	3.2949992710669167E0	3.2949992710669167E0	21.15597154966673E0	6.420630115288752E0	0.0038923420775527915E0	0.12422444287924624E0	4.161829915722134E0	4.161829915722134E0	21.15597154966673E0	5.083334008856506E0	0.6940363535600662E0	0.9158026677352563E0	1.263074608928377E0	1.263074608928377E0	6.420630115288752E0	5.083334008856506E0
chr10:81297615-81298534	Pip5k1c	ENSMUST00000160291.7	Intron 1	0.008139227949655247E0	0.9999999999998793E0	0.3022079610086032E0	-3.3089796730124266E0	6.368379192262308E0	21.072837297231274E0	0.0025662616411933677E0	0.09339433239951844E0	0.26131935691877695E0	-3.8267352705556332E0	6.368379192262308E0	24.37010127130277E0	0.625058500508236E0	0.896125467039406E0	0.8647004402089122E0	-1.1564698634343233E0	21.072837297231274E0	24.37010127130277E0
chr9:32725813-32733366	Ets1	ENSMUST00000183879.1	TTS	0.008201401493460986E0	0.9999999999998793E0	1.3119211687067773E0	1.3119211687067773E0	219.22335816534402E0	167.10101444696014E0	0.2694169104175612E0	0.8565483502551655E0	1.114568435508568E0	1.114568435508568E0	219.22335816534402E0	196.68900641826832E0	0.12124954177846532E0	0.8510386542359729E0	0.8495696708722604E0	-1.177066501177345E0	167.10101444696014E0	196.68900641826832E0
chr3:133543166-133545392	Tet2	ENSMUST00000196398.4	TSS	0.008283378703367705E0	0.9999999999998793E0	1.4375907231750653E0	1.4375907231750653E0	128.98666323538174E0	89.72419003268303E0	3.582136335471233E-7	9.44781889770876E-5	2.2408580637859146E0	2.2408580637859146E0	128.98666323538174E0	57.56128213558498E0	0.008576336326297215E0	0.2179621260510749E0	1.5587594074318674E0	1.5587594074318674E0	89.72419003268303E0	57.56128213558498E0
chr14:7990013-7992327	Dnase1l3	ENSMUST00000026315.7	Intron 1	0.008294489212151177E0	0.9999999999998793E0	0.43046913806563397E0	-2.3230469075985867E0	14.032021947180466E0	32.597045191753075E0	0.011434981391684682E0	0.24611447479353585E0	5.865844459956846E0	5.865844459956846E0	14.032021947180466E0	2.3921571809429967E0	9.650592066823896E-5	0.008961121966274029E0	13.626631833157054E0	13.626631833157054E0	32.597045191753075E0	2.3921571809429967E0
chr14:79498887-79499691	Elf1	ENSMUST00000040131.12	5' UTR Exon	0.008347519154067267E0	0.9999999999998793E0	3.02163420292588E0	3.02163420292588E0	22.882989635050585E0	7.573050905001256E0	0.009308912282759763E0	0.21773206736299738E0	2.9433349719662543E0	2.9433349719662543E0	22.882989635050585E0	7.774510836516824E0	0.9589886447774896E0	0.9998571342969699E0	0.9740871244825705E0	-1.0266022154139387E0	7.573050905001256E0	7.774510836516824E0
chr14:20797001-20798414	.	.	Intergenic	0.008379703158746473E0	0.9999999999998793E0	4.475439337998997E0	4.475439337998997E0	16.94636496643943E0	3.7865254529438612E0	0.004310074764632962E0	0.13268855453346218E0	8.096154550883606E0	8.096154550883606E0	16.94636496643943E0	2.093137533372547E0	0.49130300397247995E0	0.8692466617758743E0	1.8090189452782206E0	1.8090189452782206E0	3.7865254529438612E0	2.093137533372547E0
chr2:170217923-170221733	.	.	Intergenic	0.008400443354101323E0	0.9999999999998793E0	1.461249005615738E0	1.461249005615738E0	118.84043198671299E0	81.32798142547666E0	0.5142606647855468E0	0.8608625051195867E0	1.0903526014135811E0	1.0903526014135811E0	118.84043198671299E0	108.9926614864247E0	0.045700815338315756E0	0.5699946875928009E0	0.7461785070328453E0	-1.3401618923285095E0	81.32798142547666E0	108.9926614864247E0
chr3:58414153-58417529	Tsc22d2	ENSMUST00000099090.6	TSS	0.008444786765577016E0	0.9999999999998793E0	0.7680685036018837E0	-1.3019672012463284E0	176.14248410927118E0	229.33173705632365E0	0.19671042988924195E0	0.8565483502551655E0	0.8752846809118758E0	-1.1424854356621381E0	176.14248410927118E0	201.24022269619192E0	0.17611286025727194E0	0.8620384897188644E0	1.1395919463006206E0	1.1395919463006206E0	229.33173705632365E0	201.24022269619192E0
chr2:65818078-65818902	.	.	Intergenic	0.008456515659120728E0	0.9999999999998793E0	2.846833483150268E0	2.846833483150268E0	24.37128639231865E0	8.560840153302436E0	8.194876415839273E-4	0.04146369153873499E0	14.81890242142019E0	14.81890242142019E0	24.37128639231865E0	1.6446080620040273E0	0.05266750938178664E0	0.609746166136736E0	5.2053983870604865E0	5.2053983870604865E0	8.560840153302436E0	1.6446080620040273E0
chr12:111159612-111162087	4930595D18Rik	ENSMUST00000121608.1	TTS	0.008483727547952654E0	0.9999999999998793E0	1.7149647531295047E0	1.7149647531295047E0	64.65523957075854E0	37.70062297360588E0	0.05775835223692441E0	0.601946611284808E0	0.7329628855802245E0	-1.364325560916205E0	64.65523957075854E0	88.21079599354675E0	1.2513233988448023E-5	0.001807014846098867E0	0.4273923905682015E0	-2.3397702487649323E0	37.70062297360588E0	88.21079599354675E0
chr13:51747737-51749215	Sema4d	ENSMUST00000139865.7	TSS	0.008564225118427998E0	0.9999999999998793E0	0.4120127059195887E0	-2.4271096149038835E0	12.412942491993576E0	30.127572071566583E0	0.17064400113179626E0	0.8565483502551655E0	0.610472500590799E0	-1.6380754235976667E0	12.412942491993576E0	20.333336030665855E0	0.17071098379939328E0	0.8620384897188644E0	1.4816836758183451E0	1.4816836758183451E0	30.127572071566583E0	20.333336030665855E0
chr13:36731017-36732704	Nrn1	ENSMUST00000223611.1	TSS	0.008589083462635295E0	0.9999999999998793E0	2.217308853003217E0	2.217308853003217E0	35.04374152448781E0	15.804627973691206E0	3.992525096144745E-5	0.004360643191078596E0	10.19090851105449E0	10.19090851105449E0	35.04374152448781E0	3.438725947394626E0	0.010373496251134715E0	0.24543098093963836E0	4.596070816770289E0	4.596070816770289E0	15.804627973691206E0	3.438725947394626E0
chr15:58394979-58396466	.	.	Intergenic	0.008606832163056514E0	0.9999999999998793E0	0.0728486233868084E0	-13.727095358964357E0	1.079386304096805E0	14.816838725496941E0	0.5345060390753147E0	0.863612532886662E0	3.6097504371925804E0	3.6097504371925804E0	1.079386304096805E0	0.299019647722871E0	0.03459845635806435E0	0.49463231329080054E0	49.55138847340583E0	49.55138847340583E0	14.816838725496941E0	0.299019647722871E0
chr11:19992122-19994167	Spred2	ENSMUST00000093299.12	Intron 1	0.008727204370769424E0	0.9999999999998793E0	0.46872337927565827E0	-2.1334544940884967E0	17.593996748484912E0	37.535991432033526E0	0.022627770752159243E0	0.36883129561010486E0	2.9419466064136754E0	2.9419466064136754E0	17.593996748484912E0	5.980392951431753E0	3.0240527493940883E-5	0.0036530083117064785E0	6.276509208821657E0	6.276509208821657E0	37.535991432033526E0	5.980392951431753E0
chr12:85623378-85624164	Jdp2	ENSMUST00000050687.13	Intron 2	0.008765268743339303E0	0.9999999999998793E0	0.3348940311667544E0	-2.9860191790102943E0	7.663642756550606E0	22.88378425214343E0	0.08758926777193095E0	0.7152548888994329E0	3.9429581697966816E0	3.9429581697966816E0	7.663642756550606E0	1.9436277095848014E0	9.655758660639396E-4	0.04984401681984429E0	11.77374871704822E0	11.77374871704822E0	22.88378425214343E0	1.9436277095848014E0
chr4:8928139-8929168	.	.	Intergenic	0.00877929710870483E0	0.9999999999998793E0	3.8433928864542133E0	3.8433928864542133E0	18.349567160866258E0	4.774314701351013E0	0.05992054778735432E0	0.612741421126673E0	2.1916341941945316E0	2.1916341941945316E0	18.349567160866258E0	8.372550131528715E0	0.32735816368878384E0	0.8620384897188644E0	0.5702342328620118E0	-1.7536653227235923E0	4.774314701351013E0	8.372550131528715E0
chr8:35612318-35614372	Mfhas1	ENSMUST00000037666.5	Intron 1	0.008779297108704877E0	0.9999999999998793E0	3.84339288645421E0	3.84339288645421E0	18.34956716086625E0	4.774314701351015E0	0.004094799844416264E0	0.12799720185937863E0	5.578705220705845E0	5.578705220705845E0	18.34956716086625E0	3.2892161236195543E0	0.6030814280936011E0	0.8899039646769143E0	1.4515053197833694E0	1.4515053197833694E0	4.774314701351015E0	3.2892161236195543E0
chr13:24866132-24867435	D130043K22Rik	ENSMUST00000141572.7	CDS Exon 8	0.00892973426938444E0	0.9999999999998793E0	0.15470100919502142E0	-6.464081942344445E0	2.266711238319485E0	14.652207184130202E0	0.9909585933876427E0	0.9998888456104917E0	1.0107301226312182E0	1.0107301226312182E0	2.266711238319485E0	2.2426473571585963E0	0.00885629559432265E0	0.222379493126849E0	6.533442334284044E0	6.533442334284044E0	14.652207184130202E0	2.2426473571585963E0
chr19:7456213-7457484	Rtn3	ENSMUST00000088171.10	CDS Exon 2	0.00893452336139279E0	0.9999999999998793E0	4.196080704207786E0	4.196080704207786E0	17.270180857462666E0	4.115788535750589E0	0.0038915641412337527E0	0.12422444287924624E0	9.626001164247516E0	9.626001164247516E0	17.270180857462666E0	1.794117885795281E0	0.35334573242583217E0	0.8620384897188644E0	2.2940457638468823E0	2.2940457638468823E0	4.115788535750589E0	1.794117885795281E0
chr9:61744935-61746180	.	.	Intergenic	0.008940187889726352E0	0.9999999999998793E0	2.1854587003489776E0	2.1854587003489776E0	35.61974801416221E0	16.298522597784345E0	3.8748504814667345E-5	0.004260874067148461E0	11.912176440333997E0	11.912176440333997E0	35.61974801416221E0	2.9901964760659214E0	0.007030654055682404E0	0.1920531134334337E0	5.450652734106502E0	5.450652734106502E0	16.298522597784345E0	2.9901964760659214E0
chr2:131491402-131492619	Smox	ENSMUST00000183947.7	TSS	0.008953935790435649E0	0.9999999999998793E0	0.5769610970218892E0	-1.7332191115860645E0	35.61974801416212E0	61.73682800802555E0	0.6448234491893817E0	0.9012806749903622E0	0.8990321845684652E0	-1.112307231225542E0	35.61974801416212E0	39.62010329058417E0	0.029340442157896444E0	0.4501552434787033E0	1.558219764225034E0	1.558219764225034E0	61.73682800802555E0	39.62010329058417E0
chr5:73556564-73557884	Dcun1d4	ENSMUST00000130087.7	TTS	0.00897944103963249E0	0.9999999999998793E0	0.18329653623502348E0	-5.455640464028171E0	2.8064043901989004E0	15.310733349595425E0	0.5339885739661849E0	0.863612532886662E0	1.8770702275433746E0	1.8770702275433746E0	2.8064043901989004E0	1.4950982382112559E0	0.006627366615690047E0	0.1850191301589933E0	10.2406202872082E0	10.2406202872082E0	15.310733349595425E0	1.4950982382112559E0
chr8:34689282-34693140	.	.	Intergenic	0.009142774259373477E0	0.9999999999998793E0	0.5509692548561744E0	-1.8149833065749577E0	29.661162077481666E0	53.834514024243425E0	2.879365257192757E-4	0.01941171167539882E0	5.361875285594064E0	5.361875285594064E0	29.661162077481666E0	5.531863480147204E0	3.4705542719153863E-7	1.0021329395085789E-4	9.731714135290062E0	9.731714135290062E0	53.834514024243425E0	5.531863480147204E0
chr10:59863412-59864230	Micu1	ENSMUST00000179709.7	TTS	0.009180804573380753E0	0.9999999999998793E0	0.09148431773865877E0	-10.93083519359764E0	1.2952635648848423E0	14.158312560027975E0	0.39651625989639744E0	0.8565483502551655E0	0.41254290726157294E0	-2.4239902865811476E0	1.2952635648848423E0	3.1397062998433283E0	0.01575869133840276E0	0.31610448398671254E0	4.509438529563888E0	4.509438529563888E0	14.158312560027975E0	3.1397062998433283E0
chr2:83744273-83746525	Dnmt3l-ps1	ENSMUST00000118734.1	TSS	0.009266613158748115E0	0.9999999999998793E0	2.7682476869981913E0	2.7682476869981913E0	24.61000772041235E0	8.890103236065102E0	6.082556511394955E-4	0.03344259014035209E0	7.482028177987504E0	7.482028177987504E0	24.61000772041235E0	3.289216123619556E0	0.12340780888814487E0	0.8568173114623728E0	2.7028030089680315E0	2.7028030089680315E0	8.890103236065102E0	3.289216123619556E0
chr1:80757167-80759011	Dock10	ENSMUST00000191505.1	TSS	0.009272256514442915E0	0.9999999999998793E0	1.5851491586912534E0	1.5851491586912534E0	82.46511357263454E0	52.02356706968838E0	0.017326085293818325E0	0.315680113948886E0	0.7098711286417461E0	-1.4087063970517875E0	82.46511357263454E0	116.16913302337244E0	1.4699897848431863E-6	3.29671950229499E-4	0.44782607664999613E0	-2.2330097601296273E0	52.02356706968838E0	116.16913302337244E0
chr3:142559572-142561230	Gbp3	ENSMUST00000106222.8	TSS	0.009299981790292412E0	0.9999999999998793E0	1.7705543583152195E0	1.7705543583152195E0	57.423351339412505E0	32.43241365040835E0	0.008441566851666863E0	0.20422383955512524E0	1.7864067281996632E0	1.7864067281996632E0	57.423351339412505E0	32.14461210481649E0	0.9714307521250517E0	0.9998571342969699E0	1.0089533370212524E0	1.0089533370212524E0	32.43241365040835E0	32.14461210481649E0
chr9:15521880-15524971	Smco4	ENSMUST00000045620.9	5' UTR Exon	0.009311066969291647E0	0.9999999999998793E0	0.5320157039492668E0	-1.8796437634768772E0	26.013209914753705E0	48.89556778428168E0	4.015484259149942E-4	0.02499171885066926E0	8.285236716584503E0	8.285236716584503E0	26.013209914753705E0	3.1397062998433394E0	2.4101601999351358E-6	4.952213547573389E-4	15.573293523257696E0	15.573293523257696E0	48.89556778428168E0	3.1397062998433394E0
chr7:68258920-68260282	Pgpep1l	ENSMUST00000207874.1	CDS Exon 2	0.009332410238607331E0	0.9999999999998793E0	0.23552030663106982E0	-4.245918385145648E0	3.9937293242758045E0	16.957048763237946E0	0.7051237042753098E0	0.9172058313379831E0	1.3356076619855393E0	1.3356076619855393E0	3.9937293242758045E0	2.9901964760659223E0	0.005662927394681203E0	0.16708888589891835E0	5.670881127365796E0	5.670881127365796E0	16.957048763237946E0	2.9901964760659223E0
chr2:65333791-65334823	Slc38a11	ENSMUST00000112420.7	CDS Exon 9	0.009406224022017932E0	0.9999999999998793E0	0.15645897520830207E0	-6.39145180817302E0	2.2667112383194823E0	14.48757564276316E0	0.9337672524995717E0	0.9983823463298334E0	1.0829251313778983E0	1.0829251313778983E0	2.2667112383194823E0	2.0931375333725537E0	0.008889391893046935E0	0.2228589102597322E0	6.9214637890612725E0	6.9214637890612725E0	14.48757564276316E0	2.0931375333725537E0
chr11:114872527-114874479	Gprc5c	ENSMUST00000053361.11	TTS	0.009412702857561461E0	0.9999999999998793E0	0.46490666910484296E0	-2.150969358915533E0	16.838426336098173E0	36.21893910130352E0	7.5041261537792874E-6	0.0011564180008380473E0	0.28952240022725123E0	-3.453964181061923E0	16.838426336098173E0	58.15932143033283E0	0.025257936295926032E0	0.4143788548999735E0	0.6227538116084971E0	-1.605770982624935E0	36.21893910130352E0	58.15932143033283E0
chr8:120488364-120490044	Gse1	ENSMUST00000034279.15	TSS	0.009441384180855491E0	0.9999999999998793E0	1.9620919655696205E0	1.9620919655696205E0	43.931022549244204E0	22.389889628078908E0	0.7979574956750303E0	0.9526982725209785E0	1.0569557037713362E0	1.0569557037713362E0	43.931022549244204E0	41.56373099884262E0	0.018287146509742704E0	0.345600798080847E0	0.538688156477155E0	-1.8563615850396158E0	22.389889628078908E0	41.56373099884262E0
chr1:88699052-88702884	Arl4c	ENSMUST00000159814.1	TSS	0.009452433765006058E0	0.9999999999998793E0	1.3882645163743845E0	1.3882645163743845E0	149.47309113475018E0	107.6690280358938E0	0.022541904247157036E0	0.3680434140840882E0	1.3294605229895249E0	1.3294605229895249E0	149.47309113475018E0	112.4313874312219E0	0.7482262429776656E0	0.9359175077214398E0	0.9576420828370422E0	-1.0442314701098674E0	107.6690280358938E0	112.4313874312219E0
chr8:126883685-126885647	Gm31718	ENSMUST00000212639.1	Intron 1	0.009462481986792018E0	0.9999999999998793E0	0.4467334697499301E0	-2.238471186320054E0	15.003469620277187E0	33.584834439818756E0	0.013740502490425025E0	0.2760479667622036E0	4.363089658728004E0	4.363089658728004E0	15.003469620277187E0	3.438725947394634E0	5.700663814230246E-5	0.005958795616593598E0	9.766650484393638E0	9.766650484393638E0	33.584834439818756E0	3.438725947394634E0
chr8:72363427-72365897	Eps15l1	ENSMUST00000163643.2	Intron 21	0.00948333625942974E0	0.9999999999998793E0	3.4710226414595557E0	3.4710226414595557E0	19.42895346425909E0	5.597472408330148E0	1.1261934602276575E-4	0.009520835982377594E0	0.35997511299038515E0	-2.7779698204489756E0	19.42895346425909E0	53.97304636661933E0	3.3418132535877016E-7	9.722536301263709E-5	0.1037086617329055E0	-9.64239614406973E0	5.597472408330148E0	53.97304636661933E0
chr17:44736908-44739065	Runx2	ENSMUST00000162816.7	TSS	0.00948333625942974E0	0.9999999999998793E0	3.471022641459557E0	3.471022641459557E0	19.428953464259074E0	5.59747240833014E0	0.0022029061758282267E0	0.08358473471330875E0	8.663401047980793E0	8.663401047980793E0	19.428953464259074E0	2.2426473571585888E0	0.24712206653255728E0	0.8620384897188644E0	2.495921791030972E0	2.495921791030972E0	5.59747240833014E0	2.2426473571585888E0
chr19:6296471-6298775	Ehd1	ENSMUST00000148547.1	TSS	0.009492701477010245E0	0.9999999999998793E0	0.45362347669102443E0	-2.204471442471501E0	15.651101402335739E0	34.502406084674796E0	0.009384423124453877E0	0.2187159744820556E0	4.984893460613392E0	4.984893460613392E0	15.651101402335739E0	3.1397062998433407E0	4.7835186813217536E-5	0.005201739019256265E0	10.989055277685155E0	10.989055277685155E0	34.502406084674796E0	3.1397062998433407E0
chr8:81729290-81732022	Inpp4b	ENSMUST00000042529.13	5' UTR Exon	0.009602241922510668E0	0.9999999999998793E0	2.6915649255982683E0	2.6915649255982683E0	25.257639502417693E0	9.383997860205268E0	5.105680075823608E-4	0.029534053396993394E0	11.262421361876028E0	11.262421361876028E0	25.257639502417693E0	2.2426473571585874E0	0.05414236167888777E0	0.61731122063469E0	4.184339472833883E0	4.184339472833883E0	9.383997860205268E0	2.2426473571585874E0
chr2:18956481-18957952	Pip4k2a	ENSMUST00000006912.11	Intron 1	0.009621044794035638E0	0.9999999999998793E0	4.500058141533326E0	4.500058141533326E0	16.298733184389757E0	3.6218939115387108E0	0.010379631111458783E0	0.232546074470572E0	0.4638913329403871E0	-2.155677265323054E0	16.298733184389757E0	35.134808579155425E0	3.8370105443842006E-5	0.004398616774222708E0	0.1030856309741641E0	-9.700673028335304E0	3.6218939115387108E0	35.134808579155425E0
chr12:73601812-73608853	Prkch	ENSMUST00000221153.1	3' UTR Exon	0.009654195102086371E0	0.9999999999998793E0	1.3175459307267943E0	1.3175459307267943E0	204.11194992401113E0	154.91828039073934E0	0.021971134928129774E0	0.36300999205117834E0	1.2735145667784136E0	1.2735145667784136E0	204.11194992401113E0	160.27453100936992E0	0.7628938071262713E0	0.942411318162877E0	0.9665807749684356E0	-1.03457468418266E0	154.91828039073934E0	160.27453100936992E0
chr8:15029123-15030422	Gm37844	ENSMUST00000192473.1	TSS	0.009680274928137163E0	0.9999999999998793E0	4.969042939051516E0	4.969042939051516E0	15.543162771992959E0	3.1279992873154394E0	0.05528700067196406E0	0.5904340781592693E0	0.5463288033619903E0	-1.830399557640407E0	15.543162771992959E0	28.450198262188753E0	2.1046561067401495E-4	0.016416165452088224E0	0.1099464846778468E0	-9.095333997536082E0	3.1279992873154394E0	28.450198262188753E0
chr16:78575801-78577844	D16Ertd472e	ENSMUST00000114218.1	TSS	0.009681799815983912E0	0.9999999999998793E0	1.5866583181926086E0	1.5866583181926086E0	81.23755541072332E0	51.200409363033174E0	0.3652131833487392E0	0.8565483502551655E0	1.1590677614341802E0	1.1590677614341802E0	81.23755541072332E0	70.0887024156409E0	0.08763111287169989E0	0.7600678179408965E0	0.7305087353366005E0	-1.3689090241189579E0	51.200409363033174E0	70.0887024156409E0
chr1:176997440-176998637	Sdccag8	ENSMUST00000139589.1	TSS	0.009699330277728062E0	0.9999999999998793E0	3.8635787734594738E0	3.8635787734594738E0	17.809874009165824E0	4.609683159952437E0	0.004248073693694351E0	0.13128796080477995E0	14.890220549676188E0	14.890220549676188E0	17.809874009165824E0	1.196078590625921E0	0.1886060421148585E0	0.8620384897188644E0	3.853996882880529E0	3.853996882880529E0	4.609683159952437E0	1.196078590625921E0
chr10:13391753-13393119	Phactr2	ENSMUST00000105545.11	Intron 1	0.009699331034383397E0	0.9999999999998793E0	3.8635787734594773E0	3.8635787734594773E0	17.80987400916584E0	4.609683159952437E0	0.009836278859449944E0	0.22513662410469842E0	29.780441096227175E0	29.780441096227175E0	17.80987400916584E0	0.5980392953757202E0	0.1373109938539977E0	0.8620384897188644E0	7.707993764952163E0	7.707993764952163E0	4.609683159952437E0	0.5980392953757202E0
chr16:49969547-49971734	.	.	Intergenic	0.009734873518323849E0	0.9999999999998793E0	1.5452988431700707E0	1.5452988431700707E0	89.80494043380305E0	58.11493409881456E0	1.4325363413776625E-8	6.520337246980278E-6	33.37013736240303E0	33.37013736240303E0	89.80494043380305E0	2.6911768285072495E0	8.342712608850757E-7	2.0500078297370334E-4	21.594617448846698E0	21.594617448846698E0	58.11493409881456E0	2.6911768285072495E0
chr10:94998467-95000164	AC159379.1	ENSMUST00000218192.1	TSS	0.00977520544626353E0	0.9999999999998793E0	3.637731255751733E0	3.637731255751733E0	18.565444421545642E0	5.1035777841453305E0	0.005066258009806418E0	0.14786592269801077E0	20.69590249828709E0	20.69590249828709E0	18.565444421545642E0	0.8970589430966939E0	0.12886457599201706E0	0.8620384897188644E0	5.689233492871177E0	5.689233492871177E0	5.1035777841453305E0	0.8970589430966939E0
chr12:106616422-106617949	.	.	Intergenic	0.009819705681399829E0	0.9999999999998793E0	7.688841062317782E0	7.688841062317782E0	13.924083316835697E0	1.8109469559822475E0	0.011821800571281854E0	0.2508145869980185E0	15.52192687446941E0	15.52192687446941E0	13.924083316835697E0	0.8970589430966939E0	0.5863754303662053E0	0.8860756100958483E0	2.0187602720182074E0	2.0187602720182074E0	1.8109469559822475E0	0.8970589430966939E0
chr6:38808264-38809879	Hipk2	ENSMUST00000162359.7	Intron 2	0.009852486692754564E0	0.9999999999998793E0	0.2259341011142515E0	-4.426069349727401E0	3.6908527303081153E0	16.335970143974443E0	0.9431292257604161E0	0.9998888456104917E0	0.9494752293713896E0	-1.0532133636198817E0	3.6908527303081153E0	3.8872554187134343E0	0.010959656426771883E0	0.25394714304727906E0	4.202443211046101E0	4.202443211046101E0	16.335970143974443E0	3.8872554187134343E0
chrX:166285502-166288745	Gpm6b	ENSMUST00000060210.13	Intron 1	0.009925789917615778E0	0.9999999999998793E0	2.50512280870048E0	2.50512280870048E0	27.632289369747088E0	11.030313273975258E0	2.982755390946633E-4	0.019997437681018405E0	12.321281489728698E0	12.321281489728698E0	27.632289369747088E0	2.2426473571585874E0	0.029653308452444866E0	0.45398684965804503E0	4.9184341170564405E0	4.9184341170564405E0	11.030313273975258E0	2.2426473571585874E0
chr8:107448078-107449798	Wwp2	ENSMUST00000212205.1	5' UTR Exon	0.009945376234417517E0	0.9999999999998793E0	0.19739626978909136E0	-5.065951859518181E0	3.0222816509455717E0	15.310733349595397E0	0.37533000968888264E0	0.8565483502551655E0	0.5319632224951548E0	-1.8798292019315455E0	3.0222816509455717E0	5.681373303909368E0	0.04359035861535159E0	0.5558839998715951E0	2.6949000761946134E0	2.6949000761946134E0	15.310733349595397E0	5.681373303909368E0
chr16:45350028-45352555	.	.	Intergenic	0.009971386838029558E0	0.9999999999998793E0	2.8957327778247786E0	2.8957327778247786E0	22.882989635050578E0	7.902313987770604E0	9.65751228448493E-4	0.047087205502609066E0	11.773339885105338E0	11.773339885105338E0	22.882989635050578E0	1.943627709584793E0	0.07980826729842853E0	0.7325695386558394E0	4.065754953379798E0	4.065754953379798E0	7.902313987770604E0	1.943627709584793E0
chr15:5757759-5758953	.	.	Intergenic	0.00999040091449355E0	0.9999999999998793E0	4.470256431991763E0	4.470256431991763E0	16.19079455404774E0	3.621893911538713E0	0.009331492149971634E0	0.21793510388563972E0	21.658502607796628E0	21.658502607796628E0	16.19079455404774E0	0.7475491194954252E0	0.21418449462316727E0	0.8620384897188644E0	4.845024650665618E0	4.845024650665618E0	3.621893911538713E0	0.7475491194954252E0
chr2:132688044-132689496	1110034G24Rik	ENSMUST00000110132.2	TSS	0.010063617750230352E0	0.9999999999998793E0	2.345109675271066E0	2.345109675271066E0	30.500242626398418E0	13.005891770444792E0	0.9092485218612018E0	0.9923850196156604E0	0.9714361703125014E0	-1.02940371231834E0	30.500242626398418E0	31.397062986224604E0	0.007527219617853911E0	0.20048981773747038E0	0.41423912090602555E0	-2.4140646055176918E0	13.005891770444792E0	31.397062986224604E0
chr9:92383418-92384888	.	.	Intergenic	0.010078528843844302E0	0.9999999999998793E0	3.8401631445333653E0	3.8401631445333653E0	17.701935378825443E0	4.609683159952435E0	0.0058577688801738845E0	0.16278335463167357E0	19.733302382246418E0	19.733302382246418E0	17.701935378825443E0	0.8970589430966939E0	0.15608066619030495E0	0.8620384897188644E0	5.138662509778421E0	5.138662509778421E0	4.609683159952435E0	0.8970589430966939E0
chr4:83327416-83329088	.	.	Intergenic	0.010099258350819528E0	0.9999999999998793E0	1.7722704148769721E0	1.7722704148769721E0	56.020149145262344E0	31.609255943682367E0	0.0022535060862027023E0	0.08502709410176429E0	2.0363700837870904E0	2.0363700837870904E0	56.020149145262344E0	27.509807569496513E0	0.5942171013204317E0	0.8899039646769143E0	1.1490177044615686E0	1.1490177044615686E0	31.609255943682367E0	27.509807569496513E0
chr10:7823628-7827490	.	.	Intergenic	0.010143746938642366E0	0.9999999999998793E0	1.4089472615450331E0	1.4089472615450331E0	135.4629810536098E0	96.1448201439867E0	0.20603526043409395E0	0.8565483502551655E0	1.173731036143401E0	1.173731036143401E0	135.4629810536098E0	115.41228516774056E0	0.18589161752459676E0	0.8620384897188644E0	0.8330553372567706E0	-1.200400447937797E0	96.1448201439867E0	115.41228516774056E0
chr10:13375059-13377015	Phactr2	ENSMUST00000105546.7	Intron 1	0.010161398474123565E0	0.9999999999998793E0	3.33282451779468E0	3.33282451779468E0	19.75276935527491E0	5.926735491115883E0	0.0034032145241422607E0	0.11344714473510449E0	18.87383799427986E0	18.87383799427986E0	19.75276935527491E0	1.0465687668433643E0	0.10197777350422416E0	0.804139741438204E0	5.663015827418547E0	5.663015827418547E0	5.926735491115883E0	1.0465687668433643E0
chr16:5368364-5369800	.	.	Intergenic	0.010228709972064041E0	0.9999999999998793E0	0.171359829987405E0	-5.8356733901609275E0	2.482588499073569E0	14.487575642763185E0	0.782167597912864E0	0.9475626407312826E0	0.7907072388259505E0	-1.264690584450459E0	2.482588499073569E0	3.13970629984334E0	0.014034450663438496E0	0.29606007372819726E0	4.614309193024221E0	4.614309193024221E0	14.487575642763185E0	3.13970629984334E0
chr12:79550120-79551686	Rad51b	ENSMUST00000221257.1	Intron 1	0.010234374650871266E0	0.9999999999998793E0	3.752960112670373E0	3.752960112670373E0	17.917812639506135E0	4.7743147013510185E0	0.004738492824295528E0	0.14096950811782447E0	17.12053063990186E0	17.12053063990186E0	17.917812639506135E0	1.046568766843365E0	0.15967282557047935E0	0.8620384897188644E0	4.561873861142627E0	4.561873861142627E0	4.7743147013510185E0	1.046568766843365E0
chr18:20955802-20958999	Rnf125	ENSMUST00000050004.1	5' UTR Exon	0.010240668790441861E0	0.9999999999998793E0	0.6603758746940959E0	-1.51428911672951E0	63.575853267591E0	96.2722226899053E0	0.05198601540690307E0	0.5713559359394808E0	1.4663055226373172E0	1.4663055226373172E0	63.575853267591E0	43.357848883527765E0	1.2933408542064922E-5	0.0018577437811693332E0	2.2204104947300656E0	2.2204104947300656E0	96.2722226899053E0	43.357848883527765E0
chr15:100187055-100190626	Dip2b	ENSMUST00000100203.9	CDS Exon 24	0.01024509729416204E0	0.9999999999998793E0	0.6122278141334302E0	-1.633378910455803E0	44.14689980989193E0	72.10861511148276E0	3.935192670165881E-6	6.970460409011562E-4	8.684634874076034E0	8.684634874076034E0	44.14689980989193E0	5.083334008856504E0	7.515102597864697E-9	4.115109962129231E-6	14.185299448324782E0	14.185299448324782E0	72.10861511148276E0	5.083334008856504E0
chr16:97460433-97461828	Mx1	ENSMUST00000113768.7	CDS Exon 2	0.010282308970131843E0	0.9999999999998793E0	0.11848872477618073E0	-8.439621591750186E0	1.6190794560362807E0	13.664417935922938E0	0.9887256052922238E0	0.9998888456104917E0	0.984477392177782E0	-1.0157673583421556E0	1.6190794560362807E0	1.6446080620040273E0	0.010310791471213157E0	0.24477464973023258E0	8.308616655613523E0	8.308616655613523E0	13.664417935922938E0	1.6446080620040273E0
chr2:44343928-44345183	Arhgap15	ENSMUST00000112822.7	3' UTR Exon	0.01037474126577052E0	0.9999999999998793E0	4.440454722450165E0	4.440454722450165E0	16.082855923705573E0	3.621893911538711E0	0.00949696186269445E0	0.22055237180074022E0	21.514112590435623E0	21.514112590435623E0	16.082855923705573E0	0.7475491194954242E0	0.214184494623167E0	0.8620384897188644E0	4.845024650665622E0	4.845024650665622E0	3.621893911538711E0	0.7475491194954242E0
chr1:130849353-130851406	Pigr	ENSMUST00000027675.13	TTS	0.010446648201172182E0	0.9999999999998793E0	1.929447824062977E0	1.929447824062977E0	44.47071570086314E0	23.048415793497828E0	1.4995848271997898E-4	0.011820085726120455E0	42.491919412992424E0	42.491919412992424E0	44.47071570086314E0	1.0465687668433654E0	0.0019765900414131627E0	0.0821976474700702E0	22.022839323798937E0	22.022839323798937E0	23.048415793497828E0	1.0465687668433654E0
chr12:73708398-73709331	Prkch	ENSMUST00000221153.1	3' UTR Exon	0.010449779608610509E0	0.9999999999998793E0	0.3617310953400494E0	-2.764484482761812E0	8.635090429742089E0	23.87157350026703E0	0.8005304002396847E0	0.9538496333926694E0	0.888553953980849E0	-1.125424061780218E0	8.635090429742089E0	9.71813854527983E0	0.018188948556194396E0	0.3442878483246812E0	2.45639361787671E0	2.45639361787671E0	23.87157350026703E0	9.71813854527983E0
chr9:61822157-61823816	.	.	Intergenic	0.010473076374728305E0	0.9999999999998793E0	3.8167475156072266E0	3.8167475156072266E0	17.593996748484926E0	4.609683159952435E0	0.005035787122097532E0	0.1472954078693132E0	16.811123459714462E0	16.811123459714462E0	17.593996748484926E0	1.046568766843365E0	0.17091427808847087E0	0.8620384897188644E0	4.404567865956911E0	4.404567865956911E0	4.609683159952435E0	1.046568766843365E0
chr13:45863639-45865587	Atxn1	ENSMUST00000180110.8	5' UTR Exon	0.010510634528445285E0	0.9999999999998793E0	4.304403439759842E0	4.304403439759842E0	16.298733184389757E0	3.786525452943863E0	0.006584082705250858E0	0.1743755618110628E0	5.737603326036136E0	5.737603326036136E0	16.298733184389757E0	2.8406866522872463E0	0.7142545526144847E0	0.9266208387585164E0	1.332961328168685E0	1.332961328168685E0	3.786525452943863E0	2.8406866522872463E0
chr4:87979280-87980796	Mllt3	ENSMUST00000142454.1	3' UTR Exon	0.010533419804901394E0	0.9999999999998793E0	3.102285276897214E0	3.102285276897214E0	20.940094288992135E0	6.749893198067074E0	0.0014994082490973853E0	0.06396360577425178E0	8.23872452609138E0	8.23872452609138E0	20.940094288992135E0	2.541667004725857E0	0.18445444767928287E0	0.8620384897188644E0	2.6556953312596177E0	2.6556953312596177E0	6.749893198067074E0	2.541667004725857E0
chr6:33804716-33807638	Exoc4	ENSMUST00000143190.1	Intron 2	0.01055887847180513E0	0.9999999999998793E0	3.3146123619627987E0	3.3146123619627987E0	19.644830724936384E0	5.926735491115888E0	0.002156773193724492E0	0.08244422208598233E0	7.729112699818545E0	7.729112699818545E0	19.644830724936384E0	2.541667004725857E0	0.25881489408524827E0	0.8620384897188644E0	2.3318300470108766E0	2.3318300470108766E0	5.926735491115888E0	2.541667004725857E0
chr9:107295251-107297726	Gm17040	ENSMUST00000168672.1	TSS	0.010618726641405757E0	0.9999999999998793E0	1.47896133717645E0	1.47896133717645E0	105.67191908928632E0	71.45008894622575E0	0.5512033033384993E0	0.8680136059037894E0	1.0873679011469455E0	1.0873679011469455E0	105.67191908928632E0	97.18138541502334E0	0.04841820778391128E0	0.5863684816525625E0	0.7352240209489772E0	-1.3601296632137616E0	71.45008894622575E0	97.18138541502334E0
chr7:106549709-106552077	.	.	Intergenic	0.010669053898332457E0	0.9999999999998793E0	1.777584322645325E0	1.777584322645325E0	54.7248855814264E0	30.786098236952924E0	0.9654045020014579E0	0.9998888456104917E0	1.0083435107718188E0	1.0083435107718188E0	54.7248855814264E0	54.272066014029484E0	0.011980932411395643E0	0.2692539837530171E0	0.5672549526490227E0	-1.76287574983718E0	30.786098236952924E0	54.272066014029484E0
chr1:130998804-130999654	.	.	Intergenic	0.01071970982136967E0	0.9999999999998793E0	3.260468114894966E0	3.260468114894966E0	19.86070798561334E0	6.091367032507582E0	0.059649223461520066E0	0.611473979137561E0	132.83881598672136E0	132.83881598672136E0	19.86070798561334E0	0.14950982390266584E0	0.15671783462991867E0	0.8620384897188644E0	40.7422527396808E0	40.7422527396808E0	6.091367032507582E0	0.14950982390266584E0
chr11:108337485-108340512	Prkca	ENSMUST00000134725.1	Intron 2	0.010736921699155619E0	0.9999999999998793E0	2.5303514014351824E0	2.5303514014351824E0	26.66084169675304E0	10.53641864984893E0	4.673298115771308E-4	0.02764520208504783E0	14.860139296217463E0	14.860139296217463E0	26.66084169675304E0	1.7941178857952802E0	0.028384184913276645E0	0.44343043868934034E0	5.872757154515765E0	5.872757154515765E0	10.53641864984893E0	1.7941178857952802E0
chr7:68274937-68289499	Gm16157	ENSMUST00000135564.7	TSS	0.010780303253698534E0	0.9999999999998793E0	1.2002422518455749E0	1.2002422518455749E0	429.37987133566276E0	357.74433925769466E0	0.4957737376211157E0	0.8602291146233343E0	0.9550773024527281E0	-1.0470356665705551E0	429.37987133566276E0	449.57603979591494E0	0.001260272761114654E0	0.060183922736852476E0	0.7957371113907511E0	-1.2566964462072756E0	357.74433925769466E0	449.57603979591494E0
chr18:11995658-11997205	Tmem241	ENSMUST00000211298.1	3' UTR Exon	0.010817613297292819E0	0.9999999999998793E0	4.865521211171951E0	4.865521211171951E0	15.219346880963897E0	3.1279992873154145E0	0.014080860829299576E0	0.2803710247632638E0	25.448740573815098E0	25.448740573815098E0	15.219346880963897E0	0.5980392953757208E0	0.24107885637930498E0	0.8620384897188644E0	5.230424340845756E0	5.230424340845756E0	3.1279992873154145E0	0.5980392953757208E0
chr10:96407104-96409088	Gm20091	ENSMUST00000179683.2	TSS	0.010908284690551549E0	0.9999999999998793E0	1.7253621319233299E0	1.7253621319233299E0	59.36624668514913E0	34.40799214653634E0	1.1443257786823581E-4	0.0096063700174165E0	2.5783931695698548E0	2.5783931695698548E0	59.36624668514913E0	23.024512857770645E0	0.1356925284379237E0	0.8620384897188644E0	1.4944069548435128E0	1.4944069548435128E0	34.40799214653634E0	23.024512857770645E0
chr12:118375582-118377507	.	.	Intergenic	0.01091361569603708E0	0.9999999999998793E0	1.5520705263815566E0	1.5520705263815566E0	85.5742454998981E0	55.135539297562005E0	1.5916181791132342E-4	0.012357063452099755E0	2.036887435769142E0	2.036887435769142E0	85.5742454998981E0	42.01226047014459E0	0.18439131246759463E0	0.8620384897188644E0	1.3123678345454253E0	1.3123678345454253E0	55.135539297562005E0	42.01226047014459E0
chr1:69547817-69550955	Ikzf2	ENSMUST00000190771.6	CDS Exon 6	0.010914550560497905E0	0.9999999999998793E0	1.5586482556824197E0	1.5586482556824197E0	84.16567404412314E0	53.999145565574096E0	1.7228695274150598E-9	1.086848564507864E-6	19.4118657126616E0	19.4118657126616E0	84.16567404412314E0	4.3357848900234846E0	4.364837306517198E-7	1.213526017437963E-4	12.454295343347075E0	12.454295343347075E0	53.999145565574096E0	4.3357848900234846E0
chr9:90237306-90238194	Tbc1d2b	ENSMUST00000128874.2	TTS	0.010923413704019882E0	0.9999999999998793E0	0.28518154199879253E0	-3.5065383018520673E0	5.2889928886548665E0	18.546056142291498E0	0.09024627764477693E0	0.7257103657765802E0	0.4161829917340437E0	-2.402789205376843E0	5.2889928886548665E0	12.708335020174799E0	0.2992636839353843E0	0.8620384897188644E0	1.4593616010948067E0	1.4593616010948067E0	18.546056142291498E0	12.708335020174799E0
chr16:93552455-93553775	.	.	Intergenic	0.010953119650483612E0	0.9999999999998793E0	0.39338256617673323E0	-2.542054696828467E0	10.362108515371496E0	26.341046620546365E0	0.07385732741136314E0	0.6700237946744876E0	0.5058920322415995E0	-1.976706364733629E0	10.362108515371496E0	20.48284585439537E0	0.39318518698006216E0	0.8620384897188644E0	1.2860052166478564E0	1.2860052166478564E0	26.341046620546365E0	20.48284585439537E0
chr2:72840908-72842158	.	.	Intergenic	0.010955797149424797E0	0.9999999999998793E0	2.395800731380046E0	2.395800731380046E0	28.792978812527608E0	12.018102522216894E0	2.3175448786694273E-4	0.01642910420808242E0	12.838834746184999E0	12.838834746184999E0	28.792978812527608E0	2.2426473571585857E0	0.02100726085857996E0	0.37487377429578006E0	5.358890903580901E0	5.358890903580901E0	12.018102522216894E0	2.2426473571585857E0
chr19:47917378-47920321	Cfap43	ENSMUST00000026048.9	TSS	0.011028090074415861E0	0.9999999999998793E0	0.7275370658539603E0	-1.3745004164512653E0	110.31328019250752E0	151.6256495647067E0	0.11343453318471118E0	0.7878304485407918E0	0.816186935340122E0	-1.2252095159833443E0	110.31328019250752E0	135.15688063119717E0	0.33107585769189063E0	0.8620384897188644E0	1.1218492825270796E0	1.1218492825270796E0	151.6256495647067E0	135.15688063119717E0
chr4:135403831-135407070	Gm12990	ENSMUST00000120372.1	TSS	0.01105234682288369E0	0.9999999999998793E0	1.4818023657408403E0	1.4818023657408403E0	103.62108511343327E0	69.92908603005705E0	0.008402969159949798E0	0.20365164955993362E0	1.5066784435716247E0	1.5066784435716247E0	103.62108511343327E0	68.7745189131375E0	0.92190660364201E0	0.9998571342969699E0	1.0167877163688746E0	1.0167877163688746E0	69.92908603005705E0	68.7745189131375E0
chr7:75608420-75614370	Akap13	ENSMUST00000208708.1	TSS	0.01117756521894103E0	0.9999999999998793E0	1.290940595198717E0	1.290940595198717E0	226.1314305041794E0	175.16795997059072E0	1.8143502563361412E-5	0.00230258123766763E0	1.5808577228851701E0	1.5808577228851701E0	226.1314305041794E0	143.0435055796638E0	0.07221563952679291E0	0.6989159952156587E0	1.224578209690451E0	1.224578209690451E0	175.16795997059072E0	143.0435055796638E0
chr11:21219444-21221224	.	.	Intergenic	0.011187465373543752E0	0.9999999999998793E0	3.563570822498638E0	3.563570822498638E0	18.186960881932553E0	5.1035777841453305E0	0.00450741104910191E0	0.13658088542128383E0	17.377702696773223E0	17.377702696773223E0	18.186960881932553E0	1.0465687668433639E0	0.1397962802527594E0	0.8620384897188644E0	4.876485851511336E0	4.876485851511336E0	5.1035777841453305E0	1.0465687668433639E0
chr11:55020442-55022069	Anxa6	ENSMUST00000108883.9	CDS Exon 2	0.011229906679562866E0	0.9999999999998793E0	3.334385559723126E0	3.334385559723126E0	19.213076203581334E0	5.762103949723412E0	0.795878485286207E0	0.9517067401372262E0	1.0890433524581817E0	1.0890433524581817E0	19.213076203581334E0	17.64215920350067E0	0.019698115102028912E0	0.36150596321264256E0	0.3266099054689439E0	-3.061756496834375E0	5.762103949723412E0	17.64215920350067E0
chr6:121245016-121246228	Usp18	ENSMUST00000032198.10	TSS	0.011309594874624455E0	0.9999999999998793E0	0.46335927264728083E0	-2.158152558999767E0	15.866978663020818E0	34.24336060519309E0	0.013000888492361525E0	0.2672097697153163E0	0.4695870039381283E0	-2.1295308252009413E0	15.866978663020818E0	33.78922016570845E0	0.9560915538288995E0	0.9998571342969699E0	1.0134403942221055E0	1.0134403942221055E0	34.24336060519309E0	33.78922016570845E0
chr12:102694644-102696827	Itpk1	ENSMUST00000179210.1	TSS	0.011344004412963089E0	0.9999999999998793E0	0.595227635536851E0	-1.680029521979561E0	37.99439788135905E0	63.83171011052088E0	0.09089632327704025E0	0.7272966167164812E0	1.5495514074064516E0	1.5495514074064516E0	37.99439788135905E0	24.51961109502772E0	5.65401778629256E-5	0.005927267839268584E0	2.6032921102678164E0	2.6032921102678164E0	63.83171011052088E0	24.51961109502772E0
chr4:135154293-135155626	Runx3	ENSMUST00000127109.1	TSS	0.01134420474789885E0	0.9999999999998793E0	4.655027031148897E0	4.655027031148897E0	15.32728551130705E0	3.2926308287245662E0	0.0742294182396354E0	0.6712507363370098E0	0.5652473263549307E0	-1.7691370721709154E0	15.32728551130705E0	27.116069013801447E0	3.0302531075750085E-4	0.021578700928940153E0	0.12142729195181992E0	-8.23538089276323E0	3.2926308287245662E0	27.116069013801447E0
chr2:31462466-31465301	.	.	Intergenic	0.011355352921145683E0	0.9999999999998793E0	0.577629735944417E0	-1.7312128129363236E0	33.56891403792542E0	58.11493409881451E0	1.635452423056312E-4	0.012619539287006692E0	4.777159088994914E0	4.777159088994914E0	33.56891403792542E0	7.026961717740934E0	1.2279258511493005E-7	4.3572383335864633E-5	8.27027902430321E0	8.27027902430321E0	58.11493409881451E0	7.026961717740934E0
chr19:8991772-8994167	Ahnak	ENSMUST00000092955.9	5' UTR Exon	0.01140951179767742E0	0.9999999999998793E0	1.6986974444344387E0	1.6986974444344387E0	61.525019291510816E0	36.218939101303505E0	7.411915235028732E-8	2.5959270524293976E-5	12.859735929739932E0	12.859735929739932E0	61.525019291510816E0	4.784314361325697E0	3.166863908905424E-5	0.003783157369273033E0	7.5703510191724765E0	7.5703510191724765E0	36.218939101303505E0	4.784314361325697E0
chr9:61758219-61759968	.	.	Intergenic	0.011490821272821392E0	0.9999999999998793E0	1.9618303682560092E0	1.9618303682560092E0	41.664311312432375E0	21.237468838587873E0	7.385766912963548E-6	0.001143077237018819E0	9.854397113586197E0	9.854397113586197E0	41.664311312432375E0	4.227991913882793E0	0.0024397097081803594E0	0.09535904648295054E0	5.023062785161376E0	5.023062785161376E0	21.237468838587873E0	4.227991913882793E0
chr2:65831977-65833156	.	.	Intergenic	0.011527777188914679E0	0.9999999999998793E0	8.064342602509647E0	8.064342602509647E0	13.27645153476406E0	1.6463154145549805E0	0.04024292862213932E0	0.5043128995418257E0	44.39993035865179E0	44.39993035865179E0	13.27645153476406E0	0.299019647722871E0	0.390843894011513E0	0.8620384897188644E0	5.505709832421355E0	5.505709832421355E0	1.6463154145549805E0	0.299019647722871E0
chr3:106460543-106464237	.	.	Intergenic	0.011530119361412749E0	0.9999999999998793E0	1.4069130439319426E0	1.4069130439319426E0	131.79306762328724E0	93.67534702426325E0	0.0014164598997325772E0	0.0619477164861854E0	1.5601788617471641E0	1.5601788617471641E0	131.79306762328724E0	84.47305040122065E0	0.4907322901137456E0	0.8692466617758743E0	1.1089376621222338E0	1.1089376621222338E0	93.67534702426325E0	84.47305040122065E0
chr2:32060935-32067762	Gm16534	ENSMUST00000156387.1	TSS	0.011575532963265994E0	0.9999999999998793E0	1.40510119593111E0	1.40510119593111E0	132.5486380354139E0	94.33387318952403E0	2.4385010418989386E-5	0.0029390885239415E0	0.6265404294252557E0	-1.596066196266584E0	132.5486380354139E0	211.55640052949929E0	6.896037345301336E-11	8.174683918128473E-8	0.4459041322002932E0	-2.242634521159395E0	94.33387318952403E0	211.55640052949929E0
chr19:21912867-21914242	.	.	Intergenic	0.011601513138388222E0	0.9999999999998793E0	1.9556874619201743E0	1.9556874619201743E0	41.85581937181424E0	21.402100379944383E0	3.1673672790565434E-4	0.020923050244560103E0	46.65893996589099E0	46.65893996589099E0	41.85581937181424E0	0.8970589430966934E0	0.003247162595354757E0	0.11569163889682103E0	23.858075932071127E0	23.858075932071127E0	21.402100379944383E0	0.8970589430966934E0
chr5:107281896-107283745	Tgfbr3	ENSMUST00000031224.14	5' UTR Exon	0.01166769061166548E0	0.9999999999998793E0	3.6060068552708606E0	3.6060068552708606E0	17.80987400916584E0	4.938946242748635E0	0.02094483743933108E0	0.3538024505313125E0	2.9780441107807167E0	2.9780441107807167E0	17.80987400916584E0	5.980392951431753E0	0.7530011727107777E0	0.9388928893979482E0	0.8258564751278112E0	-1.21086415148012E0	4.938946242748635E0	5.980392951431753E0
chr7:141058645-141060947	B4galnt4	ENSMUST00000210203.1	TSS	0.011698664311631133E0	0.9999999999998793E0	0.5456312998123031E0	-1.8327394347501684E0	26.768780327086013E0	49.06019932561505E0	5.225388965106868E-4	0.030042348812033336E0	5.595113177234581E0	5.595113177234581E0	26.768780327086013E0	4.784314361325689E0	1.1759296652253876E-6	2.7338590684667724E-4	10.254384561808129E0	10.254384561808129E0	49.06019932561505E0	4.784314361325689E0
chr19:9055027-9056987	Ahnak	ENSMUST00000092955.9	Intron 5	0.011719459494656541E0	0.9999999999998793E0	1.7681273703068288E0	1.7681273703068288E0	54.14265338344099E0	30.621466695606564E0	0.0015606927620419129E0	0.06577680534245046E0	2.142807221928753E0	2.142807221928753E0	54.14265338344099E0	25.267160213650424E0	0.47454231320186635E0	0.866318462651048E0	1.2119077267362843E0	1.2119077267362843E0	30.621466695606564E0	25.267160213650424E0
chr7:30935476-30937162	Gm44662	ENSMUST00000206970.1	Intron 2	0.01173541589297946E0	0.9999999999998793E0	0.2185458701198785E0	-4.575698453837046E0	3.346097542060786E0	15.310733349595479E0	0.5469415538152315E0	0.8652201351308899E0	1.7215732856451162E0	1.7215732856451162E0	3.346097542060786E0	1.943627709584794E0	0.006717422875031342E0	0.1862798349095774E0	7.877400221293521E0	7.877400221293521E0	15.310733349595479E0	1.943627709584794E0
chr11:116751644-116753988	BC018473	ENSMUST00000156293.7	TSS	0.011974406136998628E0	0.9999999999998793E0	0.5278846935565306E0	-1.8943530892374911E0	23.638560047399E0	44.77977925091623E0	3.246948503017293E-4	0.02133645334142647E0	0.41497918426980696E0	-2.4097594238602342E0	23.638560047399E0	56.96324284070577E0	0.22822333907426806E0	0.8620384897188644E0	0.7861170996907628E0	-1.2720751150094216E0	44.77977925091623E0	56.96324284070577E0
chr17:12118697-12120051	Agpat4	ENSMUST00000024594.8	TSS	0.011983259264364813E0	0.9999999999998793E0	1.9884091454312052E0	1.9884091454312052E0	39.93729322722843E0	20.085048049086318E0	0.0024611532934194686E0	0.09061160041673665E0	2.428377567001281E0	2.428377567001281E0	39.93729322722843E0	16.44608061362781E0	0.5477958367404707E0	0.8779027527044185E0	1.2212665449568048E0	1.2212665449568048E0	20.085048049086318E0	16.44608061362781E0
chr14:59051960-59052763	AC129308.2	ENSMUST00000224109.1	Intron 2	0.01200808913542416E0	0.9999999999998793E0	7.316357891076463E0	7.316357891076463E0	13.249536051714907E0	1.8109469559813303E0	0.025744406701213682E0	0.3957711819980082E0	29.539945292384512E0	29.539945292384512E0	13.249536051714907E0	0.4485294715535806E0	0.40271423405060286E0	0.8620384897188644E0	4.037520543987259E0	4.037520543987259E0	1.8109469559813303E0	0.4485294715535806E0
chr2:71809147-71810448	Itga6	ENSMUST00000152009.1	Intron 1	0.012054963266025403E0	0.9999999999998793E0	1.977487630510452E0	1.977487630510452E0	40.369047748530576E0	20.41431113180215E0	0.8531755719623271E0	0.9710337173270728E0	1.0425070762882065E0	1.0425070762882065E0	40.369047748530576E0	38.72304434830555E0	0.019252304554875158E0	0.3571459757950211E0	0.5271876598384095E0	-1.8968577532837436E0	20.41431113180215E0	38.72304434830555E0
chr10:96663350-96664728	.	.	Intergenic	0.01215837289857357E0	0.9999999999998793E0	2.006861108870513E0	2.006861108870513E0	38.96584555429586E0	19.41631405485073E0	0.18379053565836687E0	0.8565483502551655E0	0.7542541094042751E0	-1.3258131278725414E0	38.96584555429586E0	51.661429574539355E0	2.3681921946733006E-4	0.01797106182953371E0	0.37583772293478696E0	-2.660722803957371E0	19.41631405485073E0	51.661429574539355E0
chr9:123928096-123929250	.	.	Intergenic	0.012159836299749349E0	0.9999999999998793E0	2.147025617615444E0	2.147025617615444E0	33.89272992891159E0	15.785899176440175E0	0.5224684287503516E0	0.863612532886662E0	0.8608322655809154E0	-1.1616664941400285E0	33.89272992891159E0	39.37204875335355E0	0.0021562300099860357E0	0.08734472394563411E0	0.400941776622574E0	-2.4941277220441624E0	15.785899176440175E0	39.37204875335355E0
chr4:63902300-63903869	.	.	Intergenic	0.012162157257917052E0	0.9999999999998793E0	3.5004510565196982E0	3.5004510565196982E0	18.02575126984632E0	5.149551008940064E0	0.003206400394322046E0	0.1089055509246543E0	10.047138715110693E0	10.047138715110693E0	18.02575126984632E0	1.7941178857952818E0	0.22389603191318275E0	0.8620384897188644E0	2.870241164034443E0	2.870241164034443E0	5.149551008940064E0	1.7941178857952818E0
chr2:11142448-11145157	.	.	Intergenic	0.01218482007121505E0	0.9999999999998793E0	2.7964951123709327E0	2.7964951123709327E0	22.559173744042816E0	8.066945529154395E0	0.003588667301785216E0	0.11740734024978475E0	3.8689120069971206E0	3.8689120069971206E0	22.559173744042816E0	5.830883127670886E0	0.5503884346590772E0	0.8786340291477234E0	1.3834860607773307E0	1.3834860607773307E0	8.066945529154395E0	5.830883127670886E0
chr19:30924781-30925770	Prkg1	ENSMUST00000073581.5	Intron 4	0.01233665201050294E0	0.9999999999998793E0	2.7667907145316044E0	2.7667907145316044E0	22.775051004714776E0	8.231577070537627E0	0.05273952862699965E0	0.5763520587154628E0	152.33146832907664E0	152.33146832907664E0	22.775051004714776E0	0.1495098239026659E0	0.12453573969859257E0	0.8594487779736597E0	55.05709829406637E0	55.05709829406637E0	8.231577070537627E0	0.1495098239026659E0
chr1:161787664-161788977	Fasl	ENSMUST00000000834.3	TSS	0.012399513012602625E0	0.9999999999998793E0	1.977573604495505E0	1.977573604495505E0	40.04523185755401E0	20.24967959044431E0	0.1829926120944477E0	0.8565483502551655E0	0.7566200070914504E0	-1.3216674032241564E0	40.04523185755401E0	52.92647760068267E0	2.3624019371702831E-4	0.01794964390568538E0	0.38260017496768234E0	-2.613694570538209E0	20.24967959044431E0	52.92647760068267E0
chr6:48507672-48508813	Zfp862-ps	ENSMUST00000203457.1	TSS	0.012401883382148399E0	0.9999999999998793E0	2.3766863365958453E0	2.3766863365958453E0	28.171982521407926E0	11.85347098084427E0	0.003198380334891289E0	0.10877013930193191E0	47.10724318492948E0	47.10724318492948E0	28.171982521407926E0	0.5980392953757202E0	0.02422538636585785E0	0.4049690226939693E0	19.820555392430002E0	19.820555392430002E0	11.85347098084427E0	0.5980392953757202E0
chr9:14901406-14906106	Izumo1r	ENSMUST00000121116.7	TSS	0.01240703590668478E0	0.9999999999998793E0	1.3084461475714584E0	1.3084461475714584E0	199.68646608187095E0	152.61343881251744E0	1.8542203779013728E-13	5.405954454739318E-10	2.7369009463589236E0	2.7369009463589236E0	199.68646608187095E0	72.9607939766789E0	2.164908656698555E-7	6.909325193019032E-5	2.0917184489699854E0	2.0917184489699854E0	152.61343881251744E0	72.9607939766789E0
chr17:8241520-8242854	Ccr6	ENSMUST00000177568.7	TSS	0.012416932803349453E0	0.9999999999998793E0	0.12448815387773406E0	-8.032892840407523E0	1.619079456036282E0	13.005891770444759E0	0.4005914212605096E0	0.8565483502551655E0	0.45121880480807774E0	-2.2162196906339973E0	1.619079456036282E0	3.5882357711685895E0	0.030810320548408324E0	0.4638711574448452E0	3.6245923066000474E0	3.6245923066000474E0	13.005891770444759E0	3.5882357711685895E0
chr14:31668880-31670733	.	.	Intergenic	0.012421331503153398E0	0.9999999999998793E0	1.7021952976675878E0	1.7021952976675878E0	59.69006257610418E0	35.066518311908006E0	1.09298033650819E-4	0.009305688069467086E0	2.579067251047985E0	2.579067251047985E0	59.69006257610418E0	23.14405045151481E0	0.12079039593488991E0	0.8505068885886371E0	1.515141802225585E0	1.515141802225585E0	35.066518311908006E0	23.14405045151481E0
chr10:78457291-78459063	Pdxk	ENSMUST00000041616.14	Intron 1	0.012510059802147708E0	0.9999999999998793E0	0.5739260979957138E0	-1.742384609259341E0	31.84189595265682E0	55.48082943754657E0	0.22754595391015314E0	0.8565483502551655E0	1.391995266853853E0	1.391995266853853E0	31.84189595265682E0	22.87500303404403E0	3.630352584408642E-4	0.024692120071747377E0	2.425391129128003E0	2.425391129128003E0	55.48082943754657E0	22.87500303404403E0
chr8:81558806-81560565	Inpp4b	ENSMUST00000213285.1	5' UTR Exon	0.012684970855307147E0	0.9999999999998793E0	2.152810266424091E0	2.152810266424091E0	33.31552441391979E0	15.475364890961009E0	8.715163631847781E-5	0.007795752616717788E0	6.189768740744518E0	6.189768740744518E0	33.31552441391979E0	5.382353656384346E0	0.03481671221476774E0	0.4963371477129166E0	2.875204023913351E0	2.875204023913351E0	15.475364890961009E0	5.382353656384346E0
chr2:70091048-70093229	Myo3b	ENSMUST00000112243.7	5' UTR Exon	0.012788737499819926E0	0.9999999999998793E0	1.522850299695987E0	1.522850299695987E0	88.40173823976001E0	58.05018277726183E0	4.499028009083721E-8	1.6851515570273897E-5	3.3787264092500977E0	3.3787264092500977E0	88.40173823976001E0	26.16421915599275E0	7.137586723496165E-4	0.04020641736938391E0	2.2186858484544456E0	2.2186858484544456E0	58.05018277726183E0	26.16421915599275E0
chr12:80138408-80139592	.	.	Intergenic	0.012810790289759965E0	0.9999999999998793E0	0.17378346299362826E0	-5.754287449299274E0	2.3746498686969337E0	13.664417935922938E0	0.8359550342088671E0	0.9667727085600194E0	1.2217616866576866E0	1.2217616866576866E0	2.3746498686969337E0	1.9436277095847938E0	0.010960832627516907E0	0.25394714304727906E0	7.030367939569039E0	7.030367939569039E0	13.664417935922938E0	1.9436277095847938E0
chr6:41550278-41556287	.	.	Intergenic	0.012838038340359037E0	0.9999999999998793E0	1.3263382367565077E0	1.3263382367565077E0	180.5813285192675E0	136.15028468218625E0	0.055556382594631346E0	0.592476809534877E0	1.2375230496957026E0	1.2375230496957026E0	180.5813285192675E0	145.9215879362175E0	0.5607821141182496E0	0.8786340291477234E0	0.9330373017986737E0	-1.0717685113684503E0	136.15028468218625E0	145.9215879362175E0
chr14:121109453-121110732	Farp1	ENSMUST00000026635.7	Intron 2	0.012912807855257764E0	0.9999999999998793E0	4.880857763450388E0	4.880857763450388E0	14.463776468558155E0	2.9633677459048484E0	0.008797580058589952E0	0.21000693818549984E0	12.09266396198021E0	12.09266396198021E0	14.463776468558155E0	1.196078590625921E0	0.4023014325841011E0	0.8620384897188644E0	2.4775694248937987E0	2.4775694248937987E0	2.9633677459048484E0	1.196078590625921E0
chr13:45837322-45838759	Atxn1	ENSMUST00000180110.8	5' UTR Exon	0.013002257321470359E0	0.9999999999998793E0	3.013971541648191E0	3.013971541648191E0	20.343986008138835E0	6.749893198067067E0	0.003073187288158906E0	0.106084458347381E0	19.438747507724585E0	19.438747507724585E0	20.343986008138835E0	1.0465687668433639E0	0.07601239258687825E0	0.715810731140625E0	6.449545803307255E0	6.449545803307255E0	6.749893198067067E0	1.0465687668433639E0
chr1:52856033-52857614	Hibch	ENSMUST00000159352.7	Intron 2	0.013042283636082725E0	0.9999999999998793E0	4.692984998038408E0	4.692984998038408E0	14.679653729246153E0	3.127999287315432E0	0.008367403391336434E0	0.202880850985308E0	12.273151483770084E0	12.273151483770084E0	14.679653729246153E0	1.196078590625921E0	0.3712039170947126E0	0.8620384897188644E0	2.6152121706973412E0	2.6152121706973412E0	3.127999287315432E0	1.196078590625921E0
chr13:45849165-45850411	Atxn1	ENSMUST00000180110.8	5' UTR Exon	0.013142366804175735E0	0.9999999999998793E0	7.152410290615518E0	7.152410290615518E0	12.95263564372627E0	1.8109469559822466E0	0.03428836892511566E0	0.4652565057935851E0	3.4653604197288654E0	3.4653604197288654E0	12.95263564372627E0	3.7377455949415217E0	0.42350933532228485E0	0.8620384897188644E0	0.4845024654521945E0	-2.063972985290555E0	1.8109469559822466E0	3.7377455949415217E0
chr8:128539830-128548176	.	.	Intergenic	0.013210098353334738E0	0.9999999999998793E0	1.3386647810556387E0	1.3386647810556387E0	168.81601781670327E0	126.10776066251553E0	5.606650757395784E-16	3.3600346508475298E-12	26.884046104071693E0	26.884046104071693E0	168.81601781670327E0	6.279412598951592E0	2.2035919772534538E-13	6.79165935320748E-10	20.082732051015476E0	20.082732051015476E0	126.10776066251553E0	6.279412598951592E0
chr13:45826800-45828822	Atxn1	ENSMUST00000180110.8	5' UTR Exon	0.013217836783988482E0	0.9999999999998793E0	4.133367541519541E0	4.133367541519541E0	15.651101402335746E0	3.786525452943864E0	0.006716091936876939E0	0.1763324795662882E0	13.085345331819168E0	13.085345331819168E0	15.651101402335746E0	1.196078590625921E0	0.27190464889468907E0	0.8620384897188644E0	3.16578315389989E0	3.16578315389989E0	3.786525452943864E0	1.196078590625921E0
chr2:11170798-11180375	Prkcq	ENSMUST00000114853.7	TSS	0.013221644553235393E0	0.9999999999998793E0	1.2544599979789566E0	1.2544599979789566E0	269.3068826211358E0	214.67952988139314E0	0.005841383457214125E0	0.1626373345009019E0	1.2893811513760185E0	1.2893811513760185E0	269.3068826211358E0	208.8652237034281E0	0.7775526647376789E0	0.9474613728284411E0	1.0278375982122372E0	1.0278375982122372E0	214.67952988139314E0	208.8652237034281E0
chr12:80135463-80136933	.	.	Intergenic	0.013223608721151619E0	0.9999999999998793E0	0.20347374114855185E0	-4.914639079987826E0	2.9143430205725736E0	14.322944101395736E0	0.5574453025554436E0	0.8680136059037894E0	1.7720593057420124E0	1.7720593057420124E0	2.9143430205725736E0	1.6446080620040275E0	0.008569900017238181E0	0.2179621260510749E0	8.70903191605579E0	8.70903191605579E0	14.322944101395736E0	1.6446080620040275E0
chr15:59596448-59597209	Nsmce2	ENSMUST00000227173.1	Intron 7	0.013286867811300075E0	0.9999999999998793E0	0.2582814828616608E0	-3.8717448456636516E0	4.209606585010029E0	16.298522597784345E0	0.4744526324791991E0	0.8585542164272054E0	0.6399103049620226E0	-1.5627190127206156E0	4.209606585010029E0	6.578432246469075E0	0.04951444268009059E0	0.5919253138710984E0	2.4775694249237663E0	2.4775694249237663E0	16.298522597784345E0	6.578432246469075E0
chr9:41143260-41144816	Ubash3b	ENSMUST00000124819.1	Intron 1	0.013353966133911382E0	0.9999999999998793E0	2.09804035234948E0	2.09804035234948E0	34.540361710882244E0	16.463154139148177E0	4.484637033299874E-5	0.004761528058003517E0	8.556445479505967E0	8.556445479505967E0	34.540361710882244E0	4.036765242484376E0	0.011376842031274146E0	0.26056349903176984E0	4.078303579778185E0	4.078303579778185E0	16.463154139148177E0	4.036765242484376E0
chr2:32423284-32424118	Slc25a25	ENSMUST00000113307.8	TSS	0.013387427658584986E0	0.9999999999998793E0	0.27371278878051136E0	-3.6534646570785334E0	4.64136110647299E0	16.957048763237985E0	0.1448435000173447E0	0.846683801743309E0	0.44348362529784546E0	-2.2548746852341974E0	4.64136110647299E0	10.46568766401653E0	0.21958152717447632E0	0.8620384897188644E0	1.6202517510187378E0	1.6202517510187378E0	16.957048763237985E0	10.46568766401653E0
chr13:24414154-24417553	Cmah	ENSMUST00000144621.7	TSS	0.013523671438866453E0	0.9999999999998793E0	1.3820246524536133E0	1.3820246524536133E0	138.7901577100583E0	100.42524021814921E0	0.5570983053123515E0	0.8680136059037894E0	1.0744227544696874E0	1.0744227544696874E0	138.7901577100583E0	129.17648768390262E0	0.05843487074472973E0	0.639045499984411E0	0.777426620112878E0	-1.2862950330345075E0	100.42524021814921E0	129.17648768390262E0
chr9:32740035-32753227	Ets1	ENSMUST00000184364.1	CDS Exon 3	0.013636133539070347E0	0.9999999999998793E0	1.2098116890512378E0	1.2098116890512378E0	370.6612564613578E0	306.37929837827807E0	0.3995725204019877E0	0.8565483502551655E0	0.9408639851335387E0	-1.062852883945885E0	370.6612564613578E0	393.95838539695944E0	9.648460655073815E-4	0.04984401681984429E0	0.7776945731706278E0	-1.2858518427395504E0	306.37929837827807E0	393.95838539695944E0
chr1:94074760-94079136	.	.	Intergenic	0.013686195347681302E0	0.9999999999998793E0	0.5736829089711819E0	-1.7431232207934462E0	30.978386910016855E0	53.999145565574096E0	2.656187967163866E-4	0.018250379909673105E0	4.933325597236424E0	4.933325597236424E0	30.978386910016855E0	6.279412598951606E0	3.3438033314813124E-7	9.722536301263709E-5	8.599394404277504E0	8.599394404277504E0	53.999145565574096E0	6.279412598951606E0
chr2:174723203-174723910	.	.	Intergenic	0.013708604035657672E0	0.9999999999998793E0	3.730379517116751E0	3.730379517116751E0	16.581729510376245E0	4.445051618552859E0	0.011597860712708286E0	0.24808566897917528E0	27.726822699767105E0	27.726822699767105E0	16.581729510376245E0	0.5980392953757202E0	0.14530247251905518E0	0.8620384897188644E0	7.432708273392368E0	7.432708273392368E0	4.445051618552859E0	0.5980392953757202E0
chr10:96689714-96692069	.	.	Intergenic	0.013743990205413944E0	0.9999999999998793E0	1.4653204932225286E0	1.4653204932225286E0	102.52613783349555E0	69.96840507431952E0	0.029657559917350272E0	0.42966021500998197E0	1.3941972158947964E0	1.3941972158947964E0	102.52613783349555E0	73.5377582630548E0	0.7657596045766354E0	0.942411318162877E0	0.9514623062622171E0	-1.0510137852212573E0	69.96840507431952E0	73.5377582630548E0
chr1:59762443-59764138	Bmpr2	ENSMUST00000087435.6	TSS	0.01377477290518209E0	0.9999999999998793E0	1.4273486105358224E0	1.4273486105358224E0	116.31836788708941E0	81.49261296679572E0	2.626750204925611E-7	7.228454715712766E-5	2.4168190665429834E0	2.4168190665429834E0	116.31836788708941E0	48.12870334289076E0	0.0037696413393061884E0	0.12787500635062152E0	1.6932226988582115E0	1.6932226988582115E0	81.49261296679572E0	48.12870334289076E0
chr19:12475299-12476743	Dtx4	ENSMUST00000045521.7	Intron 7	0.013785510316231375E0	0.9999999999998793E0	0.47333837229542597E0	-2.112653565673453E0	15.974917293363363E0	33.749465981162615E0	0.5455319656766011E0	0.8638816311726913E0	0.8156382669293356E0	-1.2260336972230814E0	15.974917293363363E0	19.585786912015227E0	0.055408242211357484E0	0.6240103706338447E0	1.7231610929279764E0	1.7231610929279764E0	33.749465981162615E0	19.585786912015227E0
chr2:167776349-167779157	Gm14321	ENSMUST00000139927.1	TSS	0.013857749570027599E0	0.9999999999998793E0	0.7635060088179398E0	-1.3097473869893967E0	146.68859860508263E0	192.1250087241434E0	0.6382753131831E0	0.8966208469669243E0	1.0572523373194225E0	1.0572523373194225E0	146.68859860508263E0	138.7451163995529E0	0.003482217879610811E0	0.12105616800749501E0	1.3847334861925455E0	1.3847334861925455E0	192.1250087241434E0	138.7451163995529E0
chr2:68861251-68862474	Cers6	ENSMUST00000141983.1	TSS	0.013860391421829262E0	0.9999999999998793E0	0.4590043138842308E0	-2.1786287617597817E0	14.571715098902175E0	31.74635762263756E0	0.15893571480758953E0	0.8565483502551655E0	0.6247644989299488E0	-1.6006031099922087E0	14.571715098902175E0	23.323532505223245E0	0.258255882545902E0	0.8620384897188644E0	1.361129906695225E0	1.361129906695225E0	31.74635762263756E0	23.323532505223245E0
chr10:95903367-95904778	.	.	Intergenic	0.013877953151521977E0	0.9999999999998793E0	4.212793326116742E0	4.212793326116742E0	15.258290498433146E0	3.621893911538711E0	0.009098554344448385E0	0.2148146974827491E0	17.00923959997628E0	17.00923959997628E0	15.258290498433146E0	0.8970589430966934E0	0.23665244475584032E0	0.8620384897188644E0	4.037520543561773E0	4.037520543561773E0	3.621893911538711E0	0.8970589430966934E0
chr2:9569020-9570308	.	.	Intergenic	0.013938280930290876E0	0.9999999999998793E0	3.572094565101596E0	3.572094565101596E0	17.054303596780624E0	4.7743147013510185E0	0.008131898212835248E0	0.1992305827647472E0	22.81362274667893E0	22.81362274667893E0	17.054303596780624E0	0.7475491194954246E0	0.13603841786670415E0	0.8620384897188644E0	6.386623402852178E0	6.386623402852178E0	4.7743147013510185E0	0.7475491194954246E0
chr13:30748715-30750075	Irf4	ENSMUST00000110307.2	TSS	0.014018247770178018E0	0.9999999999998793E0	1.731293064250811E0	1.731293064250811E0	54.72488558142616E0	31.609255943682452E0	1.767593238494409E-5	0.0022506061838922908E0	3.3580614159248277E0	3.3580614159248277E0	54.72488558142616E0	16.296570789892666E0	0.029826309048262205E0	0.45566540659441845E0	1.9396262165342724E0	1.9396262165342724E0	31.609255943682452E0	16.296570789892666E0
chr6:54150540-54152707	9530036M11Rik	ENSMUST00000138767.1	TSS	0.014026170013572115E0	0.9999999999998793E0	3.13642856706624E0	3.13642856706624E0	19.10513757324229E0	6.0913670325075815E0	0.0024500507590818938E0	0.09044980339987717E0	7.986572841217309E0	7.986572841217309E0	19.10513757324229E0	2.392157180942996E0	0.22058915653551542E0	0.8620384897188644E0	2.5463907978263975E0	2.5463907978263975E0	6.0913670325075815E0	2.392157180942996E0
chr14:79531816-79537288	Elf1	ENSMUST00000227104.1	CDS Exon 2	0.014036736696583424E0	0.9999999999998793E0	1.4119860001581162E0	1.4119860001581162E0	122.27260900271952E0	86.59619074766128E0	0.9860846539891116E0	0.9998888456104917E0	1.0022343673733947E0	1.0022343673733947E0	122.27260900271952E0	122.00001614708687E0	0.014715654479243669E0	0.3045121418836471E0	0.7098047482490357E0	-1.4088381381877555E0	86.59619074766128E0	122.00001614708687E0
chr11:117095815-117096522	Gm11730	ENSMUST00000147186.1	TTS	0.014069386721890745E0	0.9999999999998793E0	0.2568477236390381E0	-3.8933574564412097E0	4.101667954643151E0	15.96925951505588E0	0.1921982423790459E0	0.8565483502551655E0	4.572350553113025E0	4.572350553113025E0	4.101667954643151E0	0.8970589430966934E0	0.007965498450132594E0	0.2082180951516023E0	17.801795119425684E0	17.801795119425684E0	15.96925951505588E0	0.8970589430966934E0
chr6:49657438-49658399	.	.	Intergenic	0.01407358556824968E0	0.9999999999998793E0	0.19513024118219724E0	-5.124782268199417E0	2.698465759824458E0	13.829049477291647E0	0.2537054741087062E0	0.8565483502551655E0	9.024376091585038E0	9.024376091585038E0	2.698465759824458E0	0.29901964772287104E0	0.038059689626083026E0	0.5181891832682638E0	46.24796257571775E0	46.24796257571775E0	13.829049477291647E0	0.29901964772287104E0
chr14:121928635-121931386	Ubac2	ENSMUST00000226998.1	Intron 3	0.014127311872973034E0	0.9999999999998793E0	1.7214856462711887E0	1.7214856462711887E0	55.54852373839409E0	32.26778210943237E0	0.20340401042259826E0	0.8565483502551655E0	0.7955837639447184E0	-1.2569386723551659E0	55.54852373839409E0	69.82108767902648E0	2.8795094548641684E-4	0.020875088939822744E0	0.46214951932244497E0	-2.1638018827025824E0	32.26778210943237E0	69.82108767902648E0
chr6:49658791-49659896	.	.	Intergenic	0.014202112239042549E0	0.9999999999998793E0	0.18389835413063194E0	-5.437786568169345E0	2.482588499073568E0	13.499786394553944E0	0.4086229676223465E0	0.8565483502551655E0	2.767475335013712E0	2.767475335013712E0	2.482588499073568E0	0.8970589430966934E0	0.012895312763280636E0	0.2814763402900388E0	15.048940204477523E0	15.048940204477523E0	13.499786394553944E0	0.8970589430966934E0
chr10:94093034-94094563	Fgd6	ENSMUST00000020208.4	Intron 5	0.014208381209915176E0	0.9999999999998793E0	2.294731635347516E0	2.294731635347516E0	28.71167567306702E0	12.511997146332494E0	0.01302527091840002E0	0.26744237673088256E0	96.0193615761222E0	96.0193615761222E0	28.71167567306702E0	0.2990196477228709E0	0.04360994485672191E0	0.5560023143279947E0	41.84339471207095E0	41.84339471207095E0	12.511997146332494E0	0.2990196477228709E0
chr6:15726963-15728543	Mdfic	ENSMUST00000128849.2	TSS	0.014264392532975683E0	0.9999999999998793E0	3.629422484197222E0	3.629422484197222E0	16.730487705756666E0	4.609683159952435E0	0.00855725639032796E0	0.20618649063968014E0	22.380452694599242E0	22.380452694599242E0	16.730487705756666E0	0.7475491194954246E0	0.14457267494984577E0	0.8620384897188644E0	6.166395009686918E0	6.166395009686918E0	4.609683159952435E0	0.7475491194954246E0
chr10:96397974-96401727	.	.	Intergenic	0.014264923968274128E0	0.9999999999998793E0	1.3706199173172442E0	1.3706199173172442E0	143.23456243541472E0	104.503488257906E0	4.904525876381956E-4	0.02864460854699246E0	1.5993785745617362E0	1.5993785745617362E0	143.23456243541472E0	89.55638440677752E0	0.28376310800899596E0	0.8620384897188644E0	1.1669016000382135E0	1.1669016000382135E0	104.503488257906E0	89.55638440677752E0
chr16:57029982-57031938	.	.	Intergenic	0.014301164219017318E0	0.9999999999998793E0	1.9168641578294514E0	1.9168641578294514E0	41.340495421457575E0	21.56673192130068E0	5.849681058225746E-4	0.03252694045329824E0	55.30137664981974E0	55.30137664981974E0	41.340495421457575E0	0.7475491194954246E0	0.0042662150706359E0	0.1387426645507104E0	28.849919502089225E0	28.849919502089225E0	21.56673192130068E0	0.7475491194954246E0
chr3:79252286-79253795	4921511C10Rik	ENSMUST00000200412.1	TTS	0.014306576739878648E0	0.9999999999998793E0	0.49022445171578216E0	-2.0398819285737524E0	17.593996748484894E0	35.889676018619696E0	0.6737351628457656E0	0.9084956276614575E0	0.8716878835608877E0	-1.1471996099279838E0	17.593996748484894E0	20.183826206936082E0	0.03857374221574927E0	0.5218945558810385E0	1.778140361032556E0	1.778140361032556E0	35.889676018619696E0	20.183826206936082E0
chr10:75589028-75593305	Ggt5	ENSMUST00000189972.1	TSS	0.01431139598199484E0	0.9999999999998793E0	1.370035194807842E0	1.370035194807842E0	143.45043969601875E0	104.70566029228087E0	0.1322108110948997E0	0.8257759727427547E0	0.843120972268423E0	-1.1860694169538837E0	143.45043969601875E0	170.1421793720352E0	9.290668834114253E-5	0.00874530819495992E0	0.6154009586495894E0	-1.6249568447120377E0	104.70566029228087E0	170.1421793720352E0
chr13:36733763-36734487	Nrn1	ENSMUST00000037623.14	TSS	0.014337133311334476E0	0.9999999999998793E0	2.7899472769261973E0	2.7899472769261973E0	21.587726071014878E0	7.737682446386224E0	0.0013125686098060274E0	0.0586296950913482E0	7.599474603660702E0	7.599474603660702E0	21.587726071014878E0	2.840686652287248E0	0.1486179556990235E0	0.8620384897188644E0	2.723877496363789E0	2.723877496363789E0	7.737682446386224E0	2.840686652287248E0
chr11:55025239-55027029	Anxa6	ENSMUST00000108883.9	5' UTR Exon	0.014372808851856171E0	0.9999999999998793E0	3.7825246733305136E0	3.7825246733305136E0	16.19079455404774E0	4.2804200771522645E0	0.18119357396412425E0	0.8565483502551655E0	0.6523645370305257E0	-1.532885286119113E0	16.19079455404774E0	24.818630742477247E0	7.849817922170566E-4	0.04296212119321692E0	0.17246801894780994E0	-5.798176416130849E0	4.2804200771522645E0	24.818630742477247E0
chr13:45850841-45851394	Atxn1	ENSMUST00000180110.8	5' UTR Exon	0.014467323302168024E0	0.9999999999998793E0	8.377591682750184E0	8.377591682750184E0	12.41294249199356E0	1.4816838731293547E0	0.01720588537763358E0	0.3148647439682283E0	5.930304289175559E0	5.930304289175559E0	12.41294249199356E0	2.093137533372546E0	0.7476088622320756E0	0.9356381017834772E0	0.7078769787009681E0	-1.4126748433535863E0	1.4816838731293547E0	2.093137533372546E0
chr7:122288675-122290384	Prkcb	ENSMUST00000064921.4	TSS	0.014504893655872311E0	0.9999999999998793E0	0.5960341911390573E0	-1.6777561000132217E0	35.61974801443682E0	59.761249512155224E0	0.04464455206854721E0	0.5303316556866416E0	0.6491649289516495E0	-1.5404405805084413E0	35.61974801443682E0	54.870105308923456E0	0.6478905974784954E0	0.9036357837399485E0	1.0891404194632797E0	1.0891404194632797E0	59.761249512155224E0	54.870105308923456E0
chr9:90250141-90250647	Tbc1d2b	ENSMUST00000144348.7	3' UTR Exon	0.014505976557413766E0	0.9999999999998793E0	0.15220882527410626E0	-6.569921278868971E0	1.9428953471819637E0	12.764669484066303E0	0.5246953163122685E0	0.863612532886662E0	0.5650044164333629E0	-1.769897669672359E0	1.9428953471819637E0	3.438725947394626E0	0.03087462295281222E0	0.46405715504928413E0	3.7120345381804967E0	3.7120345381804967E0	12.764669484066303E0	3.438725947394626E0
chr4:40843657-40846070	B4galt1	ENSMUST00000030121.12	Intron 1	0.014571250107813651E0	0.9999999999998793E0	1.539702283574392E0	1.539702283574392E0	81.36822281756056E0	52.846724776341595E0	0.9277295152664953E0	0.994682204909381E0	0.9859298679459267E0	-1.0142709258655351E0	81.36822281756056E0	82.52942269320032E0	0.011403534254077054E0	0.2609532139563118E0	0.640337991612968E0	-1.5616752607182776E0	52.846724776341595E0	82.52942269320032E0
chr19:43885866-43887237	Dnmbp	ENSMUST00000212032.1	Intron 3	0.01479646539234673E0	0.9999999999998793E0	0.12238568727936455E0	-8.170890095320892E0	1.5111408256527428E0	12.347365604961034E0	0.9926176637323043E0	0.9998888456104917E0	1.0107301226310572E0	1.0107301226310572E0	1.5111408256527428E0	1.4950982382112583E0	0.014765490865183696E0	0.30500093278864254E0	8.258564748048578E0	8.258564748048578E0	12.347365604961034E0	1.4950982382112583E0
chr15:101485419-101486069	Krt83	ENSMUST00000159029.1	TTS	0.014823672579646245E0	0.9999999999998793E0	0.20826135858652356E0	-4.801658871271328E0	2.9143430205725767E0	13.993681018659991E0	0.5070185916590306E0	0.860232237318076E0	1.9492652362826095E0	1.9492652362826095E0	2.9143430205725767E0	1.4950982382112559E0	0.009344662229426858E0	0.2304651506845447E0	9.359706714257193E0	9.359706714257193E0	13.993681018659991E0	1.4950982382112559E0
chr8:122564094-122565274	Gm20388	ENSMUST00000127664.1	Intron 1	0.014873214275135292E0	0.9999999999998793E0	2.111843249402074E0	2.111843249402074E0	33.02922088628073E0	15.639996432326262E0	0.0630010213317858E0	0.6247677085489249E0	1.7019228046077899E0	1.7019228046077899E0	33.02922088628073E0	19.407002947993494E0	0.5253775819723667E0	0.875173998899523E0	0.8058944739812745E0	-1.240857249038831E0	15.639996432326262E0	19.407002947993494E0
chr17:65960499-65963527	.	.	Intergenic	0.014877976706310098E0	0.9999999999998793E0	1.5898611645151222E0	1.5898611645151222E0	71.45537328061575E0	44.94441079225198E0	4.804725412598672E-9	2.6176774971376593E-6	10.862067222622718E0	10.862067222622718E0	71.45537328061575E0	6.5784322464690455E0	4.163669403232844E-6	7.679538813708945E-4	6.832085382710411E0	6.832085382710411E0	44.94441079225198E0	6.5784322464690455E0
chr2:45023663-45025089	Zeb2	ENSMUST00000202432.3	TSS	0.014985012025551199E0	0.9999999999998793E0	4.277254884483675E0	4.277254884483675E0	14.787592359589974E0	3.457262370132297E0	0.007769357085011318E0	0.19342346107348854E0	10.98968466222167E0	10.98968466222167E0	14.787592359589974E0	1.3455884144177546E0	0.35303935439520073E0	0.8620384897188644E0	2.5693312554480325E0	2.5693312554480325E0	3.457262370132297E0	1.3455884144177546E0
chr2:163120188-163124273	Gm11454	ENSMUST00000144092.1	TSS	0.015066073245734344E0	0.9999999999998793E0	0.6686792263526222E0	-1.4954853696511556E0	60.8773875096037E0	91.04124236319636E0	1.2036503644518993E-7	3.8414608214354954E-5	6.0843656415474285E0	6.0843656415474285E0	60.8773875096037E0	10.005543896622365E0	3.374616747486492E-11	4.439390639044029E-8	9.099079800542347E0	9.099079800542347E0	91.04124236319636E0	10.005543896622365E0
chrX:169996096-169998910	Mid1	ENSMUST00000171433.7	3' UTR Exon	0.015127581444280894E0	0.9999999999998793E0	0.7530032726858433E0	-1.3280154765239711E0	128.55490871416455E0	170.72290835553684E0	0.26392722039796945E0	0.8565483502551655E0	0.8738237340907397E0	-1.144395558265024E0	128.55490871416455E0	147.11766652565558E0	0.18589579797541958E0	0.8620384897188644E0	1.1604514426264694E0	1.1604514426264694E0	170.72290835553684E0	147.11766652565558E0
chr10:94298119-94299295	Gm4792	ENSMUST00000065826.4	TSS	0.015189547217085451E0	0.9999999999998793E0	5.6665822007074045E0	5.6665822007074045E0	13.060574274072357E0	2.304841580246008E0	0.019706669503467413E0	0.3404031320012074E0	21.838990138377113E0	21.838990138377113E0	13.060574274072357E0	0.5980392953757204E0	0.35255576426087176E0	0.8620384897188644E0	3.8539968829272038E0	3.8539968829272038E0	2.304841580246008E0	0.5980392953757204E0
chr17:83148785-83150385	.	.	Intergenic	0.0151972862910281E0	0.9999999999998793E0	4.1424376270323116E0	4.1424376270323116E0	15.003469620277201E0	3.621893911538712E0	0.008445827815638102E0	0.20423151400052209E0	14.335866018178923E0	14.335866018178923E0	15.003469620277201E0	1.0465687668433639E0	0.2632792950438726E0	0.8620384897188644E0	3.4607318948213823E0	3.4607318948213823E0	3.621893911538712E0	1.0465687668433639E0
chr2:169155138-169157276	.	.	Intergenic	0.015286528314486483E0	0.9999999999998793E0	3.184525534591762E0	3.184525534591762E0	18.34956716086625E0	5.762103949723412E0	0.0034349154863144815E0	0.11408086153177405E0	6.459553413288879E0	6.459553413288879E0	18.34956716086625E0	2.840686652287247E0	0.32927850803141956E0	0.8620384897188644E0	2.0284194122867847E0	2.0284194122867847E0	5.762103949723412E0	2.840686652287247E0
chr11:100830835-100831826	Stat5b	ENSMUST00000004143.2	5' UTR Exon	0.015345496583692208E0	0.9999999999998793E0	0.31305219231488124E0	-3.1943555245706676E0	5.72074741010192E0	18.274101094132405E0	0.2580245617857908E0	0.8565483502551655E0	0.5545413716861866E0	-1.803291965321385E0	5.72074741010192E0	10.316177840269914E0	0.14204799839699372E0	0.8620384897188644E0	1.7714022942487662E0	1.7714022942487662E0	18.274101094132405E0	10.316177840269914E0
chr14:30177519-30178847	Cacna1d	ENSMUST00000112249.8	CDS Exon 7	0.01535940329407868E0	0.9999999999998793E0	7.474268753633555E0	7.474268753633555E0	12.305003861646547E0	1.6463154145567178E0	0.015979727887472876E0	0.3026494156574268E0	6.858525829918973E0	6.858525829918973E0	12.305003861646547E0	1.7941178857952802E0	0.9365076361554721E0	0.9998571342969699E0	0.9176183056817105E0	-1.0897777363509407E0	1.6463154145567178E0	1.7941178857952802E0
chr1:83006698-83007421	.	.	Intergenic	0.015416293553929216E0	0.9999999999998793E0	2.151080698326773E0	2.151080698326773E0	31.51808006166744E0	14.65220718413024E0	3.403010389903663E-4	0.021962497342102733E0	23.423269496048338E0	23.423269496048338E0	31.51808006166744E0	1.3455884144177546E0	0.008032587468587407E0	0.20919083750425246E0	10.889070556147997E0	10.889070556147997E0	14.65220718413024E0	1.3455884144177546E0
chr15:78605476-78607892	Cyth4	ENSMUST00000043069.5	CDS Exon 4	0.015512562079935368E0	0.9999999999998793E0	0.5350605784884516E0	-1.8689472560751985E0	22.990928265386266E0	42.96883229621539E0	0.6865770636916713E0	0.9124221109694434E0	1.1307012401070036E0	1.1307012401070036E0	22.990928265386266E0	20.333336030665826E0	0.00544200412704562E0	0.16272167968241044E0	2.1132209801388084E0	2.1132209801388084E0	42.96883229621539E0	20.333336030665826E0
chr10:85388005-85390159	Btbd11	ENSMUST00000105307.7	CDS Exon 1	0.015514613036250567E0	0.9999999999998793E0	3.1324908036430923E0	3.1324908036430923E0	18.56544442154563E0	5.926735491115885E0	0.0027584095925219138E0	0.09833374685198823E0	8.869672501468289E0	8.869672501468289E0	18.56544442154563E0	2.093137533372546E0	0.19550383148798794E0	0.8620384897188644E0	2.831507914134287E0	2.831507914134287E0	5.926735491115885E0	2.093137533372546E0
chr17:84892606-84894156	.	.	Intergenic	0.015521953015690206E0	0.9999999999998793E0	0.12403954791799339E0	-8.061944894068244E0	1.511140825652739E0	12.182734063589168E0	0.6127354156092184E0	0.8880918855573511E0	0.5945471310140134E0	-1.6819524438617302E0	1.511140825652739E0	2.541667004725857E0	0.02304791676250075E0	0.39364280001919627E0	4.793206207161348E0	4.793206207161348E0	12.182734063589168E0	2.541667004725857E0
chr14:25857123-25859029	Anxa11os	ENSMUST00000184083.1	TTS	0.015525408768233424E0	0.9999999999998793E0	0.5459673190877906E0	-1.831611462881722E0	24.71794635074678E0	45.273673874923226E0	0.21706725782731456E0	0.8565483502551655E0	0.7219500876347562E0	-1.38513730675785E0	24.71794635074678E0	34.237749636858425E0	0.21734651287833762E0	0.8620384897188644E0	1.3223320561402832E0	1.3223320561402832E0	45.273673874923226E0	34.237749636858425E0
chr10:40478344-40480108	Cdk19	ENSMUST00000216736.1	TTS	0.01554554212705321E0	0.9999999999998793E0	0.45717433365324844E0	-2.1873493903497803E0	13.924083316835667E0	30.456835154260038E0	0.006838603639778847E0	0.1784826606906681E0	0.42140977969841753E0	-2.3729871687260116E0	13.924083316835667E0	33.041671047122954E0	0.7457205266561653E0	0.9356381017834772E0	0.9217704247107688E0	-1.084868827630023E0	30.456835154260038E0	33.041671047122954E0
chr2:131504458-131505830	Smox	ENSMUST00000110188.7	5' UTR Exon	0.015563964849933382E0	0.9999999999998793E0	0.41471111190016213E0	-2.411317110405136E0	10.68592440642133E0	25.7671523616996E0	0.04717781883165773E0	0.5452466199279502E0	3.761739929258752E0	3.761739929258752E0	10.68592440642133E0	2.8406866522872525E0	4.202747963594616E-4	0.02752659569379733E0	9.070747856315833E0	9.070747856315833E0	25.7671523616996E0	2.8406866522872525E0
chr5:65921126-65922089	.	.	Intergenic	0.015567697755873838E0	0.9999999999998793E0	0.3562125599297843E0	-2.8073125781896E0	7.44776549583862E0	20.90820575587426E0	0.2585701931461921E0	0.8565483502551655E0	0.5930304291482511E0	-1.686254112518754E0	7.44776549583862E0	12.558825196433151E0	0.1533648994522684E0	0.8620384897188644E0	1.6648217829970615E0	1.6648217829970615E0	20.90820575587426E0	12.558825196433151E0
chr3:37283349-37284231	.	.	Intergenic	0.015581484687951291E0	0.9999999999998793E0	4.69873620514286E0	4.69873620514286E0	13.924083316835697E0	2.963367745904848E0	0.19303232139548684E0	0.8565483502551655E0	1.7909915632806621E0	1.7909915632806621E0	13.924083316835697E0	7.774510836516814E0	0.15771524102055953E0	0.8620384897188644E0	0.38116452703184023E0	-2.6235389945310046E0	2.963367745904848E0	7.774510836516814E0
chr6:94915696-94916781	.	.	Intergenic	0.015616373994112191E0	0.9999999999998793E0	2.3415628932037635E0	2.3415628932037635E0	26.9846575877517E0	11.524207898097863E0	8.534110949829084E-4	0.04283853655146174E0	22.560940225199044E0	22.560940225199044E0	26.9846575877517E0	1.1960785906259201E0	0.018365046336872328E0	0.3467692356900803E0	9.634992205710436E0	9.634992205710436E0	11.524207898097863E0	1.1960785906259201E0
chr13:51396971-51398678	Gm32834	ENSMUST00000222417.1	Intron 1	0.015746518156026994E0	0.9999999999998793E0	2.0344110594054206E0	2.0344110594054206E0	35.08005486252298E0	17.24334652052841E0	2.0574177384264795E-4	0.015006073272297492E0	26.070419815335864E0	26.070419815335864E0	35.08005486252298E0	1.345588414417754E0	0.004378510529605471E0	0.1412286705231443E0	12.81472576292189E0	12.81472576292189E0	17.24334652052841E0	1.345588414417754E0
chr11:21332628-21333815	Ugp2	ENSMUST00000102875.10	CDS Exon 4	0.015845253939251156E0	0.9999999999998793E0	2.050474486525974E0	2.050474486525974E0	34.43242308055398E0	16.79241722187496E0	0.0018872239171799266E0	0.07534437661656189E0	57.5755194462961E0	57.5755194462961E0	34.43242308055398E0	0.59803929537572E0	0.01126738178220947E0	0.25900039800665253E0	28.079120137624194E0	28.079120137624194E0	16.79241722187496E0	0.59803929537572E0
chr7:132315461-132317899	Chst15	ENSMUST00000077472.9	TSS	0.015875629235590275E0	0.9999999999998793E0	1.4012405314753253E0	1.4012405314753253E0	122.72622267770932E0	87.58397999556469E0	1.1055726482787094E-6	2.3900087833220282E-4	2.1948054799079917E0	2.1948054799079917E0	122.72622267770932E0	55.91667407484974E0	0.008756184734562198E0	0.22062364639554252E0	1.5663302842069124E0	1.5663302842069124E0	87.58397999556469E0	55.91667407484974E0
chr18:32052140-32053572	.	.	Intergenic	0.016004494205174052E0	0.9999999999998793E0	0.10777604555214948E0	-9.278499641333854E0	1.295263564884852E0	12.01810252221691E0	0.7204909068923985E0	0.9259951573339874E0	0.6664154655222279E0	-1.5005654156245654E0	1.295263564884852E0	1.943627709584794E0	0.018449428490762098E0	0.34755533755788026E0	6.183335657827325E0	6.183335657827325E0	12.01810252221691E0	1.943627709584794E0
chr11:29799602-29800768	Eml6	ENSMUST00000058902.5	Intron 21	0.016017679657215986E0	0.9999999999998793E0	4.859431697767259E0	4.859431697767259E0	13.600267425800533E0	2.7987362044926747E0	0.01805150012812615E0	0.32282739853873227E0	22.741427747245442E0	22.741427747245442E0	13.600267425800533E0	0.598039295375721E0	0.27867271173231706E0	0.8620384897188644E0	4.679853357686731E0	4.679853357686731E0	2.7987362044926747E0	0.598039295375721E0
chr13:36734874-36735257	Nrn1	ENSMUST00000224960.1	TSS	0.01603084261183731E0	0.9999999999998793E0	3.990837626318377E0	3.990837626318377E0	15.111408250620597E0	3.7865254529438612E0	0.008256114529522213E0	0.2013137076498982E0	14.43900174491091E0	14.43900174491091E0	15.111408250620597E0	1.0465687668433643E0	0.24425512159493618E0	0.8620384897188644E0	3.6180378900133707E0	3.6180378900133707E0	3.7865254529438612E0	1.0465687668433643E0
chr1:60974625-60976224	.	.	Intergenic	0.016048875003779266E0	0.9999999999998793E0	2.748098067779315E0	2.748098067779315E0	21.263910180003908E0	7.737682446386224E0	0.0020663596428254E0	0.08012380077300714E0	5.4701602775157045E0	5.4701602775157045E0	21.263910180003908E0	3.8872554187134343E0	0.2681597251842668E0	0.8620384897188644E0	1.9905258628328484E0	1.9905258628328484E0	7.737682446386224E0	3.8872554187134343E0
chr13:36812339-36813758	.	.	Intergenic	0.016060708685214923E0	0.9999999999998793E0	3.4896358573492137E0	3.4896358573492137E0	16.660619776104E0	4.774314701351013E0	0.0048122932411261195E0	0.14245787837541105E0	7.428996682390955E0	7.428996682390955E0	16.660619776104E0	2.2426473571585888E0	0.35063582305032026E0	0.8620384897188644E0	2.1288744688777204E0	2.1288744688777204E0	4.774314701351013E0	2.2426473571585888E0
chr14:121962870-121964680	Gpr183	ENSMUST00000227267.1	5' UTR Exon	0.016087175280678524E0	0.9999999999998793E0	1.9669128303490706E0	1.9669128303490706E0	37.56264336005231E0	19.09725880093325E0	0.26118507246895445E0	0.8565483502551655E0	1.3223085814274684E0	1.3223085814274684E0	37.56264336005231E0	28.40686651182617E0	0.17963543828981374E0	0.8620384897188644E0	0.6722761481975774E0	-1.4874839791372558E0	19.09725880093325E0	28.40686651182617E0
chr4:40836623-40840634	B4galt1	ENSMUST00000030121.12	Intron 1	0.016111488294605986E0	0.9999999999998793E0	1.399841651698218E0	1.399841651698218E0	122.83416130801413E0	87.74861153688194E0	0.22469060453420994E0	0.8565483502551655E0	1.1753636618894006E0	1.1753636618894006E0	122.83416130801413E0	104.50736677579248E0	0.22739001575115458E0	0.8620384897188644E0	0.8396404410909677E0	-1.1909859876457032E0	87.74861153688194E0	104.50736677579248E0
chr9:45245892-45249101	BC049352	ENSMUST00000171799.3	TTS	0.016143874075888652E0	0.9999999999998793E0	1.4999073787558277E0	1.4999073787558277E0	88.02927617903148E0	58.68980806804998E0	4.107166607453562E-5	0.004452787773325006E0	2.180688519768197E0	2.180688519768197E0	88.02927617903148E0	40.36765240933576E0	0.06722078147803144E0	0.6793148499811035E0	1.4538821200926932E0	1.4538821200926932E0	58.68980806804998E0	40.36765240933576E0
chr3:146195222-146197301	Mcoln2	ENSMUST00000098524.4	TTS	0.016149851598985795E0	0.9999999999998793E0	3.706874179876548E0	3.706874179876548E0	15.86697866302089E0	4.280420077152258E0	0.005729718896953342E0	0.1601541052478892E0	8.163589449139133E0	8.163589449139133E0	15.86697866302089E0	1.9436277095847945E0	0.3613641650968999E0	0.8620384897188644E0	2.20228393330874E0	2.20228393330874E0	4.280420077152258E0	1.9436277095847945E0
chr9:90243673-90246227	Tbc1d2b	ENSMUST00000144348.7	3' UTR Exon	0.01616750926118829E0	0.9999999999998793E0	0.6196674670388252E0	-1.6137687601685002E0	40.908740900157234E0	66.01724808250115E0	0.06224521652872024E0	0.6223866771031272E0	1.6001115975251379E0	1.6001115975251379E0	40.908740900157234E0	25.56617986109844E0	4.65542582854761E-5	0.005103605187021507E0	2.58221010886938E0	2.58221010886938E0	66.01724808250115E0	25.56617986109844E0
chr13:41654388-41655721	Gm5082	ENSMUST00000067176.8	TSS	0.016182995319597316E0	0.9999999999998793E0	4.662311893481211E0	4.662311893481211E0	13.816144686490773E0	2.9633677459048466E0	0.010255767881052022E0	0.23078988206732948E0	11.551201396607759E0	11.551201396607759E0	13.816144686490773E0	1.1960785906259206E0	0.4023014325841012E0	0.8620384897188644E0	2.477569424893798E0	2.477569424893798E0	2.9633677459048466E0	1.1960785906259206E0
chr2:135886347-135887072	Plcb4	ENSMUST00000127044.1	TSS	0.01623343367811746E0	0.9999999999998793E0	0.26742700035803385E0	-3.7393382069169916E0	4.2096065850100235E0	15.741142739417342E0	0.2494492461438704E0	0.8565483502551655E0	3.1284503789604616E0	3.1284503789604616E0	4.2096065850100235E0	1.3455884144177521E0	0.006176659204821456E0	0.17654869062048356E0	11.698334030490795E0	11.698334030490795E0	15.741142739417342E0	1.3455884144177521E0
chr8:25273951-25276033	.	.	Intergenic	0.016242282785421402E0	0.9999999999998793E0	0.5574061912977544E0	-1.7940238476214225E0	26.33702580575378E0	47.24925237094309E0	2.1432906441703874E-14	8.253370192272041E-11	0.1961646118281101E0	-5.097759431126412E0	26.33702580575378E0	134.25982168910102E0	6.685854924405815E-10	5.079036818735412E-7	0.3519239916790289E0	-2.8415226686563804E0	47.24925237094309E0	134.25982168910102E0
chr2:29704472-29707825	Rapgef1	ENSMUST00000095087.10	CDS Exon 11	0.01626252308716365E0	0.9999999999998793E0	0.5938621419664166E0	-1.6838924883959867E0	33.89272992891161E0	57.071713338528106E0	4.33278482919E-4	0.02612579641583079E0	3.7162676631899574E0	3.7162676631899574E0	33.89272992891161E0	9.120099250283518E0	2.7174662476257076E-7	8.304284320966798E-5	6.257795202914475E0	6.257795202914475E0	57.071713338528106E0	9.120099250283518E0
chr15:101483970-101484878	.	.	Intergenic	0.016372400357624675E0	0.9999999999998793E0	0.16390940259790363E0	-6.100931271485153E0	2.050833977562033E0	12.511997146332488E0	0.6393128905070055E0	0.8966240807753907E0	1.714631457861652E0	1.714631457861652E0	2.050833977562033E0	1.196078590625921E0	0.014171002112435082E0	0.29765375619363915E0	10.46084868034033E0	10.46084868034033E0	12.511997146332488E0	1.196078590625921E0
chr9:32911423-32913652	Gm27162	ENSMUST00000185169.1	CDS Exon 2	0.016375477429907748E0	0.9999999999998793E0	3.4149109414784715E0	3.4149109414784715E0	16.866061563736345E0	4.9389462427486475E0	0.0021599633426844754E0	0.08250769322429263E0	0.41171187064543785E0	-2.4288830886326083E0	16.866061563736345E0	40.96569170399565E0	8.943208149113694E-6	0.0013861073170536517E0	0.12056298910893087E0	-8.294419434943519E0	4.9389462427486475E0	40.96569170399565E0
chr3:142495399-142497971	Gbp5	ENSMUST00000197459.1	TSS	0.016426083131983408E0	0.9999999999998793E0	1.559110743015233E0	1.559110743015233E0	74.69353219008428E0	47.9077785363926E0	7.282758516182758E-4	0.03778802354094193E0	1.9591743551227125E0	1.9591743551227125E0	74.69353219008428E0	38.12500505367521E0	0.29261176904381475E0	0.8620384897188644E0	1.2565973032382414E0	1.2565973032382414E0	47.9077785363926E0	38.12500505367521E0
chr18:12642539-12645301	Ttc39c	ENSMUST00000025294.7	TSS	0.01645989854283286E0	0.9999999999998793E0	0.7064186172268616E0	-1.4155912310545133E0	81.27778863917429E0	115.05612487711726E0	2.0454762960733853E-8	8.72140966349108E-6	27.181420782793527E0	27.181420782793527E0	81.27778863917429E0	2.990196476065924E0	4.6431502331605034E-10	3.6559893803045476E-7	38.477780907725425E0	38.477780907725425E0	115.05612487711726E0	2.990196476065924E0
chr9:57420465-57422132	Ppcdc	ENSMUST00000217255.1	TSS	0.016469329111066945E0	0.9999999999998793E0	0.5865191874829772E0	-1.7049740594019758E0	32.05777321331644E0	54.65767173089605E0	0.9338983835876725E0	0.9984699490960375E0	1.02104369530939E0	1.02104369530939E0	32.05777321331644E0	31.397062986224604E0	0.013301612567758017E0	0.2865899961414126E0	1.7408530140184446E0	1.7408530140184446E0	54.65767173089605E0	31.397062986224604E0
chr14:20798414-20799544	.	.	Intergenic	0.016565735186161827E0	0.9999999999998793E0	2.5978093984522053E0	2.5978093984522053E0	22.667112374378863E0	8.72547169468403E0	0.001160365480529435E0	0.05388381639309158E0	13.782683484329993E0	13.782683484329993E0	22.667112374378863E0	1.6446080620040273E0	0.04964662377044682E0	0.5929506472530347E0	5.305502202179198E0	5.305502202179198E0	8.72547169468403E0	1.6446080620040273E0
chr5:105061811-105063418	Gbp8	ENSMUST00000031235.12	5' UTR Exon	0.01663218159134044E0	0.9999999999998793E0	4.820864779537414E0	4.820864779537414E0	13.492328795455187E0	2.798736204492722E0	0.28169122549023123E0	0.8565483502551655E0	0.6836648557210231E0	-1.4627049959228282E0	13.492328795455187E0	19.735296735745735E0	0.0022286957683739046E0	0.08944051288013326E0	0.14181373819545798E0	-7.05150299769778E0	2.798736204492722E0	19.735296735745735E0
chr6:134366457-134367856	4933406J09Rik	ENSMUST00000203352.1	Intron 3	0.016632515932669432E0	0.9999999999998793E0	2.0672655257576773E0	2.0672655257576773E0	33.35303677726774E0	16.133891056420268E0	0.2924756862606576E0	0.8565483502551655E0	1.3200152488544783E0	1.3200152488544783E0	33.35303677726774E0	25.267160213650424E0	0.15924682239883067E0	0.8620384897188644E0	0.6385320281344493E0	-1.56609215503508E0	16.133891056420268E0	25.267160213650424E0
chr1:130996384-130997752	.	.	Intergenic	0.016775939682641603E0	0.9999999999998793E0	3.286999906413397E0	3.286999906413397E0	17.316603560019875E0	5.268209325541129E0	0.004059157236533739E0	0.12725180720040802E0	11.582251331348994E0	11.582251331348994E0	17.316603560019875E0	1.4950982382112579E0	0.1740848111173157E0	0.8620384897188644E0	3.5236542930075534E0	3.5236542930075534E0	5.268209325541129E0	1.4950982382112579E0
chr9:61824941-61825620	.	.	Intergenic	0.016877043110511553E0	0.9999999999998793E0	2.811415182143474E0	2.811415182143474E0	20.365295059642005E0	7.243787822229493E0	0.01148206196124232E0	0.2468421921708398E0	45.40458621169822E0	45.40458621169822E0	20.365295059642005E0	0.4485294715535808E0	0.07061159401862506E0	0.6942926334491979E0	16.150082172168158E0	16.150082172168158E0	7.243787822229493E0	0.4485294715535808E0
chr19:41365043-41366897	Pik3ap1	ENSMUST00000059672.7	Intron 2	0.01692216525219222E0	0.9999999999998793E0	3.8518709589964217E0	3.8518709589964217E0	15.219346880963897E0	3.951156994347804E0	0.009166226880668794E0	0.21593981050412425E0	16.96582704858381E0	16.96582704858381E0	15.219346880963897E0	0.8970589430966939E0	0.20490380169798686E0	0.8620384897188644E0	4.404567865639025E0	4.404567865639025E0	3.951156994347804E0	0.8970589430966939E0
chr6:99094488-99097193	Foxp1	ENSMUST00000175886.7	TSS	0.01699786379451974E0	0.9999999999998793E0	1.4313707100983109E0	1.4313707100983109E0	107.69148617429744E0	75.23661439663024E0	0.04392874643305101E0	0.5261158725405254E0	1.3463496412017932E0	1.3463496412017932E0	107.69148617429744E0	79.98775569039309E0	0.7029922012549578E0	0.9213987063166112E0	0.9406016426794997E0	-1.0631493233961316E0	75.23661439663024E0	79.98775569039309E0
chr1:59739533-59740525	.	.	Intergenic	0.01701102432460379E0	0.9999999999998793E0	6.228557294892977E0	6.228557294892977E0	12.305003861646552E0	1.9755784974051498E0	0.04459956751199629E0	0.529913993415748E0	41.15115496708339E0	41.15115496708339E0	12.305003861646552E0	0.2990196477228711E0	0.3359447715904155E0	0.8620384897188644E0	6.606851798702202E0	6.606851798702202E0	1.9755784974051498E0	0.2990196477228711E0
chr1:165836110-165838647	Cd247	ENSMUST00000005907.11	Intron 1	0.017049219527539988E0	0.9999999999998793E0	1.8051321213854925E0	1.8051321213854925E0	45.765979264744246E0	25.353257372439582E0	0.056092047522578126E0	0.5934505022448814E0	0.6925494053377547E0	-1.4439403056194993E0	45.765979264744246E0	66.08334208651047E0	4.1198098020813926E-5	0.00465357322282645E0	0.3836557984499231E0	-2.6065030270369434E0	25.353257372439582E0	66.08334208651047E0
chr12:118378047-118378952	.	.	Intergenic	0.017194899611436946E0	0.9999999999998793E0	6.67558293798559E0	6.67558293798559E0	12.089126600952028E0	1.8109469559822466E0	0.29205562113046624E0	0.8565483502551655E0	1.6355039785208325E0	1.6355039785208325E0	12.089126600952028E0	7.391682783850862E0	0.08982664150946042E0	0.7688541854756823E0	0.24499792658023042E0	-4.0816671959569675E0	1.8109469559822466E0	7.391682783850862E0
chr5:148738281-148742270	2210417A02Rik	ENSMUST00000150265.1	TSS	0.017209445272359746E0	0.9999999999998793E0	0.6074026906915385E0	-1.6463542478902795E0	36.69913431743664E0	60.41977567740773E0	4.3522400814758975E-5	0.004648407864446034E0	5.844357850217364E0	5.844357850217364E0	36.69913431743664E0	6.279412598951606E0	6.688893309703744E-8	2.558691446800255E-5	9.621883372896257E0	9.621883372896257E0	60.41977567740773E0	6.279412598951606E0
chr1:37113298-37114733	Vwa3b	ENSMUST00000194048.1	CDS Exon 2	0.01732004388181991E0	0.9999999999998793E0	3.21858463121263E0	3.21858463121263E0	17.486058118144285E0	5.432840866936055E0	0.004149378601374342E0	0.12925380244471685E0	12.99510157101837E0	12.99510157101837E0	17.486058118144285E0	1.3455884144177552E0	0.1472403098171257E0	0.8620384897188644E0	4.037520543967288E0	4.037520543967288E0	5.432840866936055E0	1.3455884144177552E0
chr3:115714596-115715968	S1pr1	ENSMUST00000055676.3	TSS	0.017405269515481686E0	0.9999999999998793E0	1.9475896057763713E0	1.9475896057763713E0	37.514257418253415E0	19.261890342292638E0	0.0058254344801592734E0	0.16225331620919733E0	0.5689682539416568E0	-1.7575673037507327E0	37.514257418253415E0	65.93383226281058E0	2.026993405894889E-6	4.338449596708321E-4	0.2921397055386563E0	-3.4230198122373294E0	19.261890342292638E0	65.93383226281058E0
chr5:77372418-77373902	Igfbp7	ENSMUST00000046746.9	Intron 1	0.017465194465123086E0	0.9999999999998793E0	3.3204872509408303E0	3.3204872509408303E0	16.94636496643943E0	5.103577784145333E0	0.004244271920808472E0	0.13126439992357306E0	8.718935670072115E0	8.718935670072115E0	16.94636496643943E0	1.9436277095847945E0	0.25206893210888737E0	0.8620384897188644E0	2.6258000742516576E0	2.6258000742516576E0	5.103577784145333E0	1.9436277095847945E0
chr18:89159688-89160312	.	.	Intergenic	0.017500217074057103E0	0.9999999999998793E0	4.768924845967724E0	4.768924845967724E0	13.346962622914752E0	2.798736204492723E0	0.0457155604226784E0	0.536615547954668E0	2.9757158614069454E0	2.9757158614069454E0	13.346962622914752E0	4.485294713791721E0	0.5358171661877434E0	0.875173998899523E0	0.6239804479038933E0	-1.6026143180595651E0	2.798736204492723E0	4.485294713791721E0
chr19:8994419-8997156	Ahnak	ENSMUST00000092955.9	5' UTR Exon	0.01754213922362373E0	0.9999999999998793E0	1.7372544584803378E0	1.7372544584803378E0	50.62321762924381E0	29.13978282348255E0	7.669163638885829E-7	1.7677258316613908E-4	9.151205160959018E0	9.151205160959018E0	50.62321762924381E0	5.531863480147204E0	3.4019707387868424E-4	0.023464244853270654E0	5.267625082950732E0	5.267625082950732E0	29.13978282348255E0	5.531863480147204E0
chr9:69289151-69290852	Rora	ENSMUST00000113624.2	TSS	0.01766803810036101E0	0.9999999999998793E0	0.6514704220380313E0	-1.5349891049107711E0	50.62321762924365E0	77.70608751641586E0	0.015961576836745373E0	0.3025519553874949E0	1.7543761194296912E0	1.7543761194296912E0	50.62321762924365E0	28.855395982989176E0	5.521461489258394E-6	9.622239341369478E-4	2.692948229240214E0	2.692948229240214E0	77.70608751641586E0	28.855395982989176E0
chr11:69267603-69268565	.	.	Intergenic	0.017709673851256803E0	0.9999999999998793E0	2.4863431236744207E0	2.4863431236744207E0	23.63856004739897E0	9.507360356789743E0	7.296050024018412E-4	0.03780244016527081E0	9.300415830809678E0	9.300415830809678E0	23.63856004739897E0	2.5416670047258556E0	0.06172764650278161E0	0.6533948004312198E0	3.7406002985883697E0	3.7406002985883697E0	9.507360356789743E0	2.5416670047258556E0
chr15:59598909-59600387	Nsmce2	ENSMUST00000227173.1	Intron 7	0.017800926262557738E0	0.9999999999998793E0	0.26368034328844986E0	-3.7924707906878834E0	3.993729324275792E0	15.146101808229602E0	0.026502209118887666E0	0.40220495276896023E0	0.2841718430499145E0	-3.5189974814793703E0	3.993729324275792E0	14.05392343383682E0	0.8398628609030941E0	0.9677799761370617E0	1.0777134143027425E0	1.0777134143027425E0	15.146101808229602E0	14.05392343383682E0
chr10:42859706-42861144	Scml4	ENSMUST00000105494.7	TSS	0.017869569871880406E0	0.9999999999998793E0	1.9849579021840797E0	1.9849579021840797E0	35.619748014162276E0	17.944838011410376E0	0.030957155507350065E0	0.4396894320005758E0	0.6302738860447983E0	-1.586611824068057E0	35.619748014162276E0	56.51471336959455E0	2.2999443017244364E-5	0.0029430829378400965E0	0.3175250645624767E0	-3.1493576778825867E0	17.944838011410376E0	56.51471336959455E0
chr7:129773695-129774952	.	.	Intergenic	0.017881844342012045E0	0.9999999999998793E0	0.44979789542445897E0	-2.223220717954525E0	12.736758383033639E0	28.31662511674136E0	0.9809051048464295E0	0.9998888456104917E0	0.9905826783296571E0	-1.009506850741851E0	12.736758383033639E0	12.857844843916157E0	0.0188923257121249E0	0.3527733861076769E0	2.2022839333093764E0	2.2022839333093764E0	28.31662511674136E0	12.857844843916157E0
chr3:89876541-89879681	Il6ra	ENSMUST00000029559.6	CDS Exon 9	0.017978689525949484E0	0.9999999999998793E0	1.5830033552772496E0	1.5830033552772496E0	68.5410302621384E0	43.29809537904234E0	0.1551617317531772E0	0.8565483502551655E0	0.7945204603826855E0	-1.2586208283652558E0	68.5410302621384E0	86.2671682855407E0	2.1466476409190454E-4	0.016671369400205915E0	0.5019069970597326E0	-1.9924009943240315E0	43.29809537904234E0	86.2671682855407E0
chr17:8149888-8151408	.	.	Intergenic	0.01809393953431543E0	0.9999999999998793E0	0.4103310214059135E0	-2.4370567854550917E0	9.930353993969058E0	24.200836582973366E0	0.030902077597368537E0	0.43913842927953317E0	6.641940803735919E0	6.641940803735919E0	9.930353993969058E0	1.495098238211261E0	9.540641849731252E-4	0.04943216418136739E0	16.186786904335662E0	16.186786904335662E0	24.200836582973366E0	1.495098238211261E0
chr11:115127733-115129424	Cd300lf	ENSMUST00000127927.7	TSS	0.018099178151006153E0	0.9999999999998793E0	1.9166818894382724E0	1.9166818894382724E0	38.496647844181254E0	20.085048049086318E0	1.8524848078519165E-5	0.002345458845978988E0	11.703897341296718E0	11.703897341296718E0	38.496647844181254E0	3.289216123619559E0	0.0023522928933070925E0	0.0930505651924151E0	6.106332723124343E0	6.106332723124343E0	20.085048049086318E0	3.289216123619559E0
chr13:41682265-41683664	.	.	Intergenic	0.018218686607265538E0	0.9999999999998793E0	5.432425911460265E0	5.432425911460265E0	12.520881122340421E0	2.304841580246189E0	0.014724439207472776E0	0.28720582510392056E0	11.963744303306123E0	11.963744303306123E0	12.520881122340421E0	1.046568766843365E0	0.5029906828802806E0	0.8692466617758743E0	2.202283933236414E0	2.202283933236414E0	2.304841580246189E0	1.046568766843365E0
chr15:66799235-66803286	Sla	ENSMUST00000168589.7	TSS	0.018230316955736476E0	0.9999999999998793E0	1.335352307697143E0	1.335352307697143E0	155.64750492009577E0	116.55913126665043E0	4.8232330807891956E-8	1.781837746999907E-5	2.1824990066548273E0	2.1824990066548273E0	155.64750492009577E0	71.31618591600679E0	0.001084175587990793E0	0.05355003351800861E0	1.6343993971288486E0	1.6343993971288486E0	116.55913126665043E0	71.31618591600679E0
chr8:61927392-61929046	Ddx60	ENSMUST00000154398.7	TSS	0.018407779072736608E0	0.9999999999998793E0	0.6528476629618809E0	-1.5317509071919415E0	50.515278999018946E0	77.3768244338013E0	0.009563693430518013E0	0.22148766295508251E0	0.6280160613783751E0	-1.5923159637114874E0	50.515278999018946E0	80.43628516147753E0	0.8075980232333859E0	0.9562900281037875E0	0.9619641717474361E0	-1.0395397556059398E0	77.3768244338013E0	80.43628516147753E0
chr16:24192907-24193990	.	.	Intergenic	0.018444204664951915E0	0.9999999999998793E0	0.1616640683161323E0	-6.1856664280185685E0	1.9428953471819563E0	12.01810252221691E0	0.8836131540467833E0	0.9831666384663148E0	0.866340105135203E0	-1.1542810890001887E0	1.9428953471819563E0	2.2426473571585883E0	0.021007260858580165E0	0.37487377429578006E0	5.358890903580903E0	5.358890903580903E0	12.01810252221691E0	2.2426473571585883E0
chr18:89197263-89198690	Cd226	ENSMUST00000037142.11	TSS	0.018469036459128854E0	0.9999999999998793E0	2.088063258284282E0	2.088063258284282E0	31.626018691997356E0	15.146101808229602E0	0.9015241503096268E0	0.9884246680660478E0	1.0318603690937815E0	1.0318603690937815E0	31.626018691997356E0	30.649513867629697E0	0.024821723168569777E0	0.4108262109556632E0	0.49417102906242394E0	-2.023590905151341E0	15.146101808229602E0	30.649513867629697E0
chr7:127188158-127190279	Gm25735	ENSMUST00000175164.2	TSS	0.01856232081991321E0	0.9999999999998793E0	1.5408587605362507E0	1.5408587605362507E0	75.34116397196834E0	48.895567784388014E0	0.016474397902262336E0	0.30770923056236643E0	1.5553122256259475E0	1.5553122256259475E0	75.34116397196834E0	48.44118288959422E0	0.9632658659607359E0	0.9998571342969699E0	1.009380136233036E0	1.009380136233036E0	48.895567784388014E0	48.44118288959422E0
chr9:89216914-89218472	Mthfs	ENSMUST00000147644.1	TSS	0.018735699478323608E0	0.9999999999998793E0	0.24395818059440363E0	-4.099063198305144E0	3.454036172431328E0	14.158312560028017E0	0.43348723376925363E0	0.8565483502551655E0	2.1002184363747025E0	2.1002184363747025E0	3.454036172431328E0	1.6446080620040275E0	0.008971291722986706E0	0.2240679770652666E0	8.608928100945514E0	8.608928100945514E0	14.158312560028017E0	1.6446080620040275E0
chr9:124120922-124122686	Ccr5	ENSMUST00000168179.7	TSS	0.018842367280319808E0	0.9999999999998793E0	9.92822666460263E0	9.92822666460263E0	11.441494818864566E0	1.1524207902763977E0	0.027710913255590063E0	0.4128241051816436E0	4.782919329052735E0	4.782919329052735E0	11.441494818864566E0	2.392157180942998E0	0.5195262121595605E0	0.8721782434142846E0	0.4817496105427775E0	-2.0757671166009253E0	1.1524207902763977E0	2.392157180942998E0
chr1:171974122-171975395	.	.	Intergenic	0.018879835254899054E0	0.9999999999998793E0	3.6060068552708575E0	3.6060068552708575E0	15.435224141650075E0	4.280420077152264E0	0.007046768855640431E0	0.18191035069427322E0	12.904857810031238E0	12.904857810031238E0	15.435224141650075E0	1.196078590625921E0	0.21766292134880724E0	0.8620384897188644E0	3.578711391290996E0	3.578711391290996E0	4.280420077152264E0	1.196078590625921E0
chr4:122932380-122934710	.	.	Intergenic	0.018890329771069615E0	0.9999999999998793E0	1.492367144048583E0	1.492367144048583E0	85.70327248199382E0	57.427740099860976E0	0.8591335340400788E0	0.9739308488777131E0	1.0276748620392222E0	1.0276748620392222E0	85.70327248199382E0	83.39531854650237E0	0.029587445227476934E0	0.453171443848306E0	0.6886206696103508E0	-1.452178309672058E0	57.427740099860976E0	83.39531854650237E0
chr15:39005783-39006980	Fzd6	ENSMUST00000022906.7	TSS	0.018907328979566415E0	0.9999999999998793E0	2.739108237666266E0	2.739108237666266E0	20.292462506965997E0	7.408419363615682E0	0.00209063342018936E0	0.08061395064613222E0	6.463172210718728E0	6.463172210718728E0	20.292462506965997E0	3.13970629984334E0	0.20237078381848606E0	0.8620384897188644E0	2.359589928518262E0	2.359589928518262E0	7.408419363615682E0	3.13970629984334E0
chr18:50008113-50010447	Tnfaip8	ENSMUST00000087655.5	Intron 1	0.018935382703025312E0	0.9999999999998793E0	1.708201773424926E0	1.708201773424926E0	52.026419823417534E0	30.456835154259984E0	7.521866265719715E-7	1.7412151924506072E-4	12.888146002614368E0	12.888146002614368E0	52.026419823417534E0	4.0367652424843685E0	1.3610483641059384E-4	0.011773886943159576E0	7.544861621805823E0	7.544861621805823E0	30.456835154259984E0	4.0367652424843685E0
chr2:72995058-72997589	.	.	Intergenic	0.01900197409220078E0	0.9999999999998793E0	1.6346839068786765E0	1.6346839068786765E0	60.01387846711667E0	36.71283372557897E0	0.788671448538763E0	0.9478089077037319E0	1.0507964625638686E0	1.0507964625638686E0	60.01387846711667E0	57.11275266447612E0	0.03670935172686156E0	0.5093180577275546E0	0.6428132424514392E0	-1.5556617909525163E0	36.71283372557897E0	57.11275266447612E0
chr2:35444607-35447389	Ggta1	ENSMUST00000130913.7	TSS	0.019066797765369077E0	0.9999999999998793E0	1.7332948313791077E0	1.7332948313791077E0	49.651769956350314E0	28.64588819943838E0	0.6896308533729377E0	0.9142030303008035E0	1.0852844453893034E0	1.0852844453893034E0	49.651769956350314E0	45.75000606273288E0	0.04941469363563643E0	0.5914247472048162E0	0.626139549799378E0	-1.5970880617913545E0	28.64588819943838E0	45.75000606273288E0
chr15:50665966-50667439	Trps1	ENSMUST00000165201.8	Intron 4	0.019139248215599206E0	0.9999999999998793E0	2.8848054843253945E0	2.8848054843253945E0	18.99719894290319E0	6.585261656678265E0	0.02429194598347528E0	0.3834423601222459E0	63.53160766382022E0	63.53160766382022E0	18.99719894290319E0	0.29901964772287126E0	0.09819074414085036E0	0.7939532375913328E0	22.022839324529688E0	22.022839324529688E0	6.585261656678265E0	0.29901964772287126E0
chr17:84143007-84147713	.	.	Intergenic	0.01913958316548981E0	0.9999999999998793E0	1.3525102901367947E0	1.3525102901367947E0	141.61548298087797E0	104.70566029228124E0	0.14302472227776505E0	0.8441099352794085E0	0.8460128204535803E0	-1.1820151844316746E0	141.61548298087797E0	167.39165123402316E0	1.6625558014884425E-4	0.013711382413911526E0	0.6255130379584863E0	-1.5986877000417814E0	104.70566029228124E0	167.39165123402316E0
chr5:65909755-65911147	Gm43769	ENSMUST00000201871.1	TSS	0.019268941961016334E0	0.9999999999998793E0	0.17064540544323098E0	-5.860105037124321E0	2.0508339775620215E0	12.01810252221691E0	0.003128950005969523E0	0.10745916077489664E0	0.11336406338307063E0	-8.821137582382534E0	2.0508339775620215E0	18.090688674699408E0	0.27176327555515E0	0.8620384897188644E0	0.664325318860013E0	-1.50528659921619E0	12.01810252221691E0	18.090688674699408E0
chr1:128590569-128593606	Cxcr4	ENSMUST00000052172.6	TSS	0.019327101150839313E0	0.9999999999998793E0	0.7060712725553463E0	-1.416287616943959E0	77.06818205698823E0	109.15071190769505E0	0.002113269966200522E0	0.08125498955289844E0	0.6387513786642235E0	-1.5655543508825465E0	77.06818205698823E0	120.65442773392611E0	0.4481314416084321E0	0.8644800785043375E0	0.9046556679080215E0	-1.1053929527821986E0	109.15071190769505E0	120.65442773392611E0
chr11:86827000-86828765	.	.	Intergenic	0.01934436650596806E0	0.9999999999998793E0	1.9984338692916142E0	1.9984338692916142E0	34.21654581989718E0	17.121680304600687E0	0.4467140954487148E0	0.8565483502551655E0	0.8383083434961299E0	-1.1928785008026304E0	34.21654581989718E0	40.81618188028345E0	0.0025524161563114864E0	0.09854573658904402E0	0.41948265408116087E0	-2.38388879795378E0	17.121680304600687E0	40.81618188028345E0
chr10:95193469-95195081	Cradd	ENSMUST00000220279.1	Intron 1	0.019355032120686195E0	0.9999999999998793E0	2.950369245321596E0	2.950369245321596E0	18.457505791206007E0	6.255998573898537E0	0.0030432732922240783E0	0.10532146931411229E0	7.261968525730149E0	7.261968525730149E0	18.457505791206007E0	2.5416670047258587E0	0.2259304129054207E0	0.8620384897188644E0	2.4613761607112266E0	2.4613761607112266E0	6.255998573898537E0	2.5416670047258587E0
chr19:3333049-3334716	Cpt1a	ENSMUST00000025835.4	5' UTR Exon	0.01943264452022652E0	0.9999999999998793E0	0.3247550780068833E0	-3.0792436137944073E0	5.7207474101019296E0	17.615574928687263E0	0.392982009794702E0	0.8565483502551655E0	1.8220645066028578E0	1.8220645066028578E0	5.7207474101019296E0	3.1397062998433345E0	0.004873536603339461E0	0.1512001765924756E0	5.610580495878308E0	5.610580495878308E0	17.615574928687263E0	3.1397062998433345E0
chr1:69767803-69768486	.	.	Intergenic	0.019665830556212658E0	0.9999999999998793E0	0.06286935991072756E0	-15.905999383801065E0	0.7555704129132748E0	12.018102522216868E0	0.994779868100386E0	0.9998888456104917E0	1.0107301226312324E0	1.0107301226312324E0	0.7555704129132748E0	0.7475491191914805E0	0.019809821112643084E0	0.3628089699293968E0	16.076672707761556E0	16.076672707761556E0	12.018102522216868E0	0.7475491191914805E0
chr1:165815997-165818952	Cd247	ENSMUST00000005907.11	Intron 1	0.01971441958854056E0	0.9999999999998793E0	1.6421293846360514E0	1.6421293846360514E0	58.39479901234456E0	35.560412936211314E0	0.31964874446643016E0	0.8565483502551655E0	0.8381437712462909E0	-1.1931127263679768E0	58.39479901234456E0	69.67157785532845E0	0.0011012583225408048E0	0.05420219413462397E0	0.5104005683645023E0	-1.959245467152087E0	35.560412936211314E0	69.67157785532845E0
chr1:165843670-165846662	Gm37856	ENSMUST00000191634.1	TSS	0.019745509637851662E0	0.9999999999998793E0	1.43807306000051E0	1.43807306000051E0	100.38292620417879E0	69.80377353299642E0	0.018955529909972936E0	0.33183866893516883E0	0.7345881635650064E0	-1.3613069875056683E0	100.38292620417879E0	136.65197886801442E0	4.9757506252663705E-6	8.82811097367367E-4	0.5108142166050631E0	-1.9576589051223525E0	69.80377353299642E0	136.65197886801442E0
chr6:99337963-99339326	Foxp1	ENSMUST00000177227.7	5' UTR Exon	0.019783692680910146E0	0.9999999999998793E0	3.742598024007618E0	3.742598024007618E0	14.78759235958998E0	3.951156994347806E0	0.037814693108694605E0	0.48911083809522937E0	2.9090341759613083E0	2.9090341759613083E0	14.78759235958998E0	5.083334008856506E0	0.7071580106391019E0	0.9234840770696998E0	0.7772766824811925E0	-1.2865431609344549E0	3.951156994347806E0	5.083334008856506E0
chr14:121035100-121036839	Farp1	ENSMUST00000026635.7	TSS	0.019787959883964645E0	0.9999999999998793E0	1.6023674372278103E0	1.6023674372278103E0	63.57585326754232E0	39.67620146945339E0	3.4915650821901255E-8	1.3597314083433048E-5	11.19022635315928E0	11.19022635315928E0	63.57585326754232E0	5.6813733039093774E0	1.4739632765466808E-5	0.0020384723144989754E0	6.983558260843735E0	6.983558260843735E0	39.67620146945339E0	5.6813733039093774E0
chr2:26489538-26491206	Notch1	ENSMUST00000132820.1	Intron 2	0.019826979855252638E0	0.9999999999998793E0	2.119386693140113E0	2.119386693140113E0	30.006939237041983E0	14.158312560028056E0	0.026086956462882248E0	0.39883417745109817E0	2.027294185125937E0	2.027294185125937E0	30.006939237041983E0	14.801472552528399E0	0.904875613705403E0	0.9935836717212897E0	0.956547567127672E0	-1.0454263168561573E0	14.158312560028056E0	14.801472552528399E0
chr8:111561617-111562792	Znrf1	ENSMUST00000173692.1	TSS	0.0198332302344468E0	0.9999999999998793E0	0.23697744952433922E0	-4.219810796374079E0	3.238158911689659E0	13.664417935922962E0	0.0053009484849571116E0	0.15235053212481287E0	0.18511540712838154E0	-5.402035495114021E0	3.238158911689659E0	17.492649379767325E0	0.49391658611711914E0	0.8692466617758743E0	0.7811519935755277E0	-1.2801605938720715E0	13.664417935922962E0	17.492649379767325E0
chr3:115672908-115675471	.	.	Intergenic	0.01984086511631058E0	0.9999999999998793E0	1.6302824254406918E0	1.6302824254406918E0	59.74518480027605E0	36.64713786270864E0	0.18167444969511068E0	0.8565483502551655E0	0.7934175338481055E0	-1.2603704321354754E0	59.74518480027605E0	75.30106438473776E0	3.496775793837188E-4	0.023964910750228652E0	0.4866748984511882E0	-2.054759765055556E0	36.64713786270864E0	75.30106438473776E0
chr12:39851397-39852875	.	.	Intergenic	0.019845717978300523E0	0.9999999999998793E0	4.313405329140885E0	4.313405329140885E0	13.492328795455192E0	3.127999287315413E0	0.08338111537747982E0	0.7016593384128934E0	90.24376086643628E0	90.24376086643628E0	13.492328795455192E0	0.14950982390266604E0	0.2507050674329378E0	0.8620384897188644E0	20.921697355163797E0	20.921697355163797E0	3.127999287315413E0	0.14950982390266604E0
chr9:123926729-123928096	.	.	Intergenic	0.01993287709316513E0	0.9999999999998793E0	3.1962333490551846E0	3.1962333490551846E0	16.83842633609808E0	5.26820932554113E0	0.2489531916267136E0	0.8565483502551655E0	0.6937454007339009E0	-1.4414509976457037E0	16.83842633609808E0	24.271766440952273E0	0.0014819199700820836E0	0.06767957363787663E0	0.2170509236877132E0	-4.607213749704065E0	5.26820932554113E0	24.271766440952273E0
chr4:130908705-130923220	Laptm5	ENSMUST00000139023.1	TSS	0.019949084512292437E0	0.9999999999998793E0	1.19741987190964E0	1.19741987190964E0	366.667527140809E0	306.2146668369961E0	0.7538683055799489E0	0.9360199294006186E0	1.0235661300295076E0	1.0235661300295076E0	366.667527140809E0	358.2255375431763E0	0.04383643295393737E0	0.5570637896829371E0	0.8548097071390077E0	-1.1698510108722733E0	306.2146668369961E0	358.2255375431763E0
chr4:101355659-101358114	E130102H24Rik	ENSMUST00000189920.1	TSS	0.020043342138854087E0	0.9999999999998793E0	1.3993067230740068E0	1.3993067230740068E0	114.95464129569612E0	82.15113913207173E0	0.5917924157219445E0	0.879756789987984E0	1.074698577916804E0	1.074698577916804E0	114.95464129569612E0	106.9645421123793E0	0.07200094318582348E0	0.6979987105312725E0	0.7680221642585254E0	-1.3020457566682777E0	82.15113913207173E0	106.9645421123793E0
chr15:78474876-78476774	.	.	Intergenic	0.02005794833122362E0	0.9999999999998793E0	1.648817763418857E0	1.648817763418857E0	57.27540347435663E0	34.7372552292225E0	1.3499272036511149E-4	0.010957163072946328E0	2.6060400934424237E0	2.6060400934424237E0	57.27540347435663E0	21.977944091680968E0	0.09304869723636755E0	0.7795466074074772E0	1.5805507141303154E0	1.5805507141303154E0	34.7372552292225E0	21.977944091680968E0
chr1:94024868-94027162	Neu4	ENSMUST00000190212.6	TTS	0.020072517882414244E0	0.9999999999998793E0	0.5484906078031798E0	-1.8231852756881475E0	23.20680552605758E0	42.310306130866515E0	9.127764771889173E-4	0.045125543961411586E0	7.055421308259925E0	7.055421308259925E0	23.20680552605758E0	3.2892161236195636E0	8.111011063517741E-6	0.0012905001422637895E0	12.863340242995902E0	12.863340242995902E0	42.310306130866515E0	3.2892161236195636E0
chr1:40058408-40059804	.	.	Intergenic	0.020079603916590028E0	0.9999999999998793E0	0.4219310494086857E0	-2.3700554898755324E0	10.321684233399468E0	24.462964382130135E0	0.03052812106473913E0	0.4357184445113263E0	5.753069135044137E0	5.753069135044137E0	10.321684233399468E0	1.7941178857952802E0	7.308822377294604E-4	0.040842682375192625E0	13.635093087144837E0	13.635093087144837E0	24.462964382130135E0	1.7941178857952802E0
chr2:174721969-174723203	.	.	Intergenic	0.020110063136435256E0	0.9999999999998793E0	4.62803018838782E0	4.62803018838782E0	12.95263564372627E0	2.798736204492723E0	0.014465702374783349E0	0.28428834255328916E0	14.439001743868804E0	14.439001743868804E0	12.95263564372627E0	0.8970589430966939E0	0.34835361460711445E0	0.8620384897188644E0	3.119902238342713E0	3.119902238342713E0	2.798736204492723E0	0.8970589430966939E0
chr4:8690501-8691175	Chd7	ENSMUST00000039267.9	TSS	0.02018999626248084E0	0.9999999999998793E0	2.1968117325566574E0	2.1968117325566574E0	27.848166630411615E0	12.67662868770362E0	0.03750028846533913E0	0.48740017223823745E0	0.6067202691050063E0	-1.64820602000842E0	27.848166630411615E0	45.899515886442025E0	5.011187231323926E-5	0.005362815478220297E0	0.27618218717309156E0	-3.62079832242501E0	12.67662868770362E0	45.899515886442025E0
chr16:23986074-23989526	Bcl6	ENSMUST00000023151.5	TSS	0.02033611126467858E0	0.9999999999998793E0	0.767053151826755E0	-1.3036906212020336E0	135.24710379300285E0	176.32038075967577E0	0.006677370961452078E0	0.17578512262449558E0	0.7354499673199556E0	-1.3597118015302767E0	135.24710379300285E0	183.89708315013624E0	0.6897634124788088E0	0.9158026677352563E0	0.9587992247583681E0	-1.042971222939834E0	176.32038075967577E0	183.89708315013624E0
chr13:45914981-45916850	Atxn1	ENSMUST00000180110.8	5' UTR Exon	0.020375642991147424E0	0.9999999999998793E0	3.722055992771874E0	3.722055992771874E0	14.706427569194751E0	3.951156994347804E0	0.008995905730842104E0	0.21332498107345138E0	14.052041332698973E0	14.052041332698973E0	14.706427569194751E0	1.0465687668433643E0	0.22688637697580893E0	0.8620384897188644E0	3.775343885204208E0	3.775343885204208E0	3.951156994347804E0	1.0465687668433643E0
chr11:19988713-19990153	Spred2	ENSMUST00000093299.12	Intron 1	0.02042963958899823E0	0.9999999999998793E0	0.493383858233092E0	-2.0268194496293486E0	16.08285592370561E0	32.59704519175311E0	0.9700405465432931E0	0.9998888456104917E0	0.9868858995587201E0	-1.0132883653998337E0	16.08285592370561E0	16.296570789892687E0	0.022307064020411483E0	0.3871810003336843E0	2.00023953579057E0	2.00023953579057E0	32.59704519175311E0	16.296570789892687E0
chr4:106794277-106795654	Acot11	ENSMUST00000148688.1	5' UTR Exon	0.020468638834357247E0	0.9999999999998793E0	0.6289449848892102E0	-1.5899641845083663E0	40.692863639506676E0	64.7001957518984E0	0.006494664989575474E0	0.17294470412749324E0	2.1263686170988545E0	2.1263686170988545E0	40.692863639506676E0	19.137257440822584E0	2.854382577044882E-6	5.681011286597095E-4	3.3808499442497633E0	3.3808499442497633E0	64.7001957518984E0	19.137257440822584E0
chr3:84665524-84666858	Tmem154	ENSMUST00000134890.7	TSS	0.020553760087903283E0	0.9999999999998793E0	1.701791610999371E0	1.701791610999371E0	51.27084941117094E0	30.127572071566583E0	0.17114967967989256E0	0.8565483502551655E0	1.3395558265262246E0	1.3395558265262246E0	51.27084941117094E0	38.27451487716493E0	0.32575423808128534E0	0.8620384897188644E0	0.7871444528625777E0	-1.270414847444251E0	30.127572071566583E0	38.27451487716493E0
chr10:118440966-118441455	AC153498.1	ENSMUST00000219775.1	TSS	0.020554008146961657E0	0.9999999999998793E0	3.410202519267862E0	3.410202519267862E0	15.719953125096433E0	4.609683159952435E0	0.03185080663989985E0	0.44586582723409246E0	52.57163950532631E0	52.57163950532631E0	15.719953125096433E0	0.2990196477228709E0	0.14719599637816208E0	0.8620384897188644E0	15.415987528099343E0	15.415987528099343E0	4.609683159952435E0	0.2990196477228709E0
chr12:33169895-33172387	Atxn7l1	ENSMUST00000125192.8	Intron 2	0.020561331581190157E0	0.9999999999998793E0	1.628710624277598E0	1.628710624277598E0	59.25830805483072E0	36.38357064264519E0	1.963517563883149E-7	5.7246089234801874E-5	15.244253765666741E0	15.244253765666741E0	59.25830805483072E0	3.8872554187134343E0	2.7780663603332277E-5	0.003417084977060733E0	9.359706714277875E0	9.359706714277875E0	36.38357064264519E0	3.8872554187134343E0
chr9:15505417-15506625	Smco4	ENSMUST00000045620.9	TSS	0.020689315565978403E0	0.9999999999998793E0	0.38416266228350476E0	-2.603064009541924E0	8.095397277971479E0	21.07283729723122E0	0.09760459100511279E0	0.7452120064445455E0	3.3841410349048378E0	3.3841410349048378E0	8.095397277971479E0	2.392157180942999E0	0.001427789379293266E0	0.06598968453834725E0	8.809135731174743E0	8.809135731174743E0	21.07283729723122E0	2.392157180942999E0
chr5:122230625-122236961	Hvcn1	ENSMUST00000145854.7	TTS	0.0206907080618633E0	0.9999999999998793E0	1.2724804738523996E0	1.2724804738523996E0	209.49042171942804E0	164.6315413274685E0	0.6655995170065021E0	0.9052495148319469E0	1.0436114693780842E0	1.0436114693780842E0	209.49042171942804E0	200.7360285569389E0	0.059331020591108716E0	0.6426114908254367E0	0.8201394762613363E0	-1.2193047999086333E0	164.6315413274685E0	200.7360285569389E0
chr10:42861449-42862656	Gm34006	ENSMUST00000216467.1	TTS	0.020698982548314336E0	0.9999999999998793E0	2.3860909744439827E0	2.3860909744439827E0	23.962375938404186E0	10.042524025718677E0	0.9952951515024672E0	0.9998888456104917E0	1.0017057465378243E0	1.0017057465378243E0	23.962375938404186E0	23.921571800126802E0	0.020981590257477607E0	0.37472633871604005E0	0.4198103749046057E0	-2.38202783870511E0	10.042524025718677E0	23.921571800126802E0
chr11:118239498-118241313	Cyth1	ENSMUST00000100181.10	Intron 1	0.020785281762278802E0	0.9999999999998793E0	1.7470343635767356E0	1.7470343635767356E0	47.169181458941424E0	26.999572785947432E0	0.8606574875295077E0	0.974849114863662E0	0.9648079152322314E0	-1.036475742178481E0	47.169181458941424E0	48.88971236060775E0	0.013278035920657176E0	0.2864110315674968E0	0.5522546867692759E0	-1.8107587385995072E0	26.999572785947432E0	48.88971236060775E0
chr3:89801168-89802230	.	.	Intergenic	0.020795487209018502E0	0.9999999999998793E0	1.9669128303490726E0	1.9669128303490726E0	34.648300341210486E0	17.615574928687295E0	0.0017702235320299275E0	0.072196341425582E0	2.8261704643578978E0	2.8261704643578978E0	34.648300341210486E0	12.259805548948915E0	0.3298011382204612E0	0.8620384897188644E0	1.4368559809823043E0	1.4368559809823043E0	17.615574928687295E0	12.259805548948915E0
chr7:98579359-98580545	.	.	Intergenic	0.020899962397362984E0	0.9999999999998793E0	0.04047145744113275E0	-24.708771643683388E0	0.5396931521115707E0	13.335154853184484E0	0.26337399459000366E0	0.8565483502551655E0	0.18998686520987196E0	-5.263521764493216E0	0.5396931521115707E0	2.8406866522872E0	0.0179641491833894E0	0.3415816434564651E0	4.694342067769982E0	4.694342067769982E0	13.335154853184484E0	2.8406866522872E0
chr1:106560125-106561998	Bcl2	ENSMUST00000112751.1	Intron 1	0.020962992837710293E0	0.9999999999998793E0	1.9490318046216386E0	1.9490318046216386E0	35.2959321231789E0	18.10946955277152E0	3.8684595313125514E-5	0.004260874067148461E0	7.869255952044415E0	7.869255952044415E0	35.2959321231789E0	4.485294713791728E0	0.00814256650218634E0	0.21073970160516964E0	4.037520543987252E0	4.037520543987252E0	18.10946955277152E0	4.485294713791728E0
chr6:54055867-54057741	Chn2	ENSMUST00000133315.3	Intron 1	0.021064212373184635E0	0.9999999999998793E0	3.791295745035297E0	3.791295745035297E0	14.355837838213919E0	3.786525452943863E0	0.009702248520219225E0	0.2236522485453269E0	13.717051657784182E0	13.717051657784182E0	14.355837838213919E0	1.0465687668433643E0	0.24425512159493581E0	0.8620384897188644E0	3.618037890013372E0	3.618037890013372E0	3.786525452943863E0	1.0465687668433643E0
chr1:53837801-53839422	Hecw2	ENSMUST00000152870.1	TTS	0.02107484158648787E0	0.9999999999998793E0	3.395266194932415E0	3.395266194932415E0	15.651101402335746E0	4.609683159952438E0	0.018019938181199822E0	0.32254712808791935E0	3.6097504371926905E0	3.6097504371926905E0	15.651101402335746E0	4.335784890023488E0	0.9270454584036527E0	0.9998571342969699E0	1.0631715541421767E0	1.0631715541421767E0	4.609683159952438E0	4.335784890023488E0
chr5:140206767-140208102	Gm16120	ENSMUST00000127990.7	TSS	0.021133061572670253E0	0.9999999999998793E0	0.5250902984846333E0	-1.9044343475511096E0	19.536892094597786E0	37.20672834935177E0	0.8136618973954163E0	0.9601819220423549E0	1.0799418665537572E0	1.0799418665537572E0	19.536892094597786E0	18.090688674699397E0	0.011877695159635075E0	0.267826632515743E0	2.0566783840234324E0	2.0566783840234324E0	37.20672834935177E0	18.090688674699397E0
chr17:34836210-34838454	Dxo	ENSMUST00000173644.1	TSS	0.021207549974778556E0	0.9999999999998793E0	0.7338858174761234E0	-1.3626097904971908E0	96.17331962212063E0	131.04670690171716E0	0.4044504566071584E0	0.8565483502551655E0	0.88970612456419E0	-1.1239666361629643E0	96.17331962212063E0	108.09560254430055E0	0.1383828157267202E0	0.8620384897188644E0	1.2123222759964785E0	1.2123222759964785E0	131.04670690171716E0	108.09560254430055E0
chr3:142561230-142562631	Gbp3	ENSMUST00000142060.1	TSS	0.021231664910666106E0	0.9999999999998793E0	2.1745161183243242E0	2.1745161183243242E0	27.923527347719336E0	12.841260229074376E0	3.083531790778768E-4	0.020532705238683828E0	6.440247396029856E0	6.440247396029856E0	27.923527347719336E0	4.335784890023484E0	0.05061196764740158E0	0.5985214398674124E0	2.9616921860265135E0	2.9616921860265135E0	12.841260229074376E0	4.335784890023484E0
chr14:54222705-54237540	Trac	ENSMUST00000103740.1	TTS	0.021293885762580466E0	0.9999999999998793E0	1.1402230839473373E0	1.1402230839473373E0	659.0732765675809E0	578.0213414781393E0	0.08374723799553951E0	0.7022250233036562E0	1.1026081127520198E0	1.1026081127520198E0	659.0732765675809E0	597.7402750307976E0	0.5652607303529007E0	0.8798268675078365E0	0.9670108667988914E0	-1.0341145423839062E0	578.0213414781393E0	597.7402750307976E0
chr3:103777625-103781360	Gm15886	ENSMUST00000152867.1	TTS	0.021329587856365174E0	0.9999999999998793E0	0.6230477194603985E0	-1.6050134985905538E0	38.42615240288352E0	61.674493305525885E0	0.7630694265045606E0	0.9407371618709406E0	0.934597204316786E0	-1.0699796611643249E0	38.42615240288352E0	41.115201527886015E0	0.04401069451244285E0	0.5580973277995698E0	1.5000411286734352E0	1.5000411286734352E0	61.674493305525885E0	41.115201527886015E0
chr16:38016062-38017995	.	.	Intergenic	0.02140660311910202E0	0.9999999999998793E0	3.3234044371919906E0	3.3234044371919906E0	15.866978663020918E0	4.774314701351015E0	0.005657625986721363E0	0.15909934516829866E0	9.647878439612105E0	9.647878439612105E0	15.866978663020918E0	1.6446080620040286E0	0.2385125942461527E0	0.8620384897188644E0	2.9030106392238517E0	2.9030106392238517E0	4.774314701351015E0	1.6446080620040286E0
chr17:84180062-84184269	Zfp36l2	ENSMUST00000060366.6	TTS	0.021418273395977464E0	0.9999999999998793E0	1.393720668292222E0	1.393720668292222E0	114.95464129569591E0	82.4804022147093E0	0.8513518373519238E0	0.9704466322817088E0	0.9757320346344014E0	-1.0248715472119265E0	114.95464129569591E0	117.81374108391189E0	0.013013847774754023E0	0.28308989735955653E0	0.7000915296965512E0	-1.42838465769389E0	82.4804022147093E0	117.81374108391189E0
chr1:57374168-57376055	4930558J18Rik	ENSMUST00000181949.2	CDS Exon 2	0.02142264338740705E0	0.9999999999998793E0	0.28505983057835427E0	-3.5080354814324863E0	4.317545215376436E0	15.146101808229602E0	0.23766867461853622E0	0.8565483502551655E0	3.2086670553303374E0	3.2086670553303374E0	4.317545215376436E0	1.3455884144177548E0	0.007119729632294333E0	0.19375040227661117E0	11.256117878202321E0	11.256117878202321E0	15.146101808229602E0	1.3455884144177548E0
chr10:93103483-93104731	.	.	Intergenic	0.021507153952159637E0	0.9999999999998793E0	2.389756870919648E0	2.389756870919648E0	23.60576143465951E0	9.877892484341022E0	0.002366106865512487E0	0.0883791710191927E0	26.314615796785002E0	26.314615796785002E0	23.60576143465951E0	0.8970589430966934E0	0.029596173022302958E0	0.453176433276776E0	11.011419662393678E0	11.011419662393678E0	9.877892484341022E0	0.8970589430966934E0
chr19:7457484-7458249	Rtn3	ENSMUST00000088171.10	CDS Exon 2	0.02157661075252813E0	0.9999999999998793E0	3.448168171396177E0	3.448168171396177E0	15.327285511307043E0	4.445051618552863E0	0.010767109049938451E0	0.238000090338004E0	20.5033824689039E0	20.5033824689039E0	15.327285511307043E0	0.7475491194954249E0	0.15383238391256113E0	0.8620384897188644E0	5.94616661652033E0	5.94616661652033E0	4.445051618552863E0	0.7475491194954249E0
chr8:128532316-128536854	.	.	Intergenic	0.021592285860732963E0	0.9999999999998793E0	1.4266188739416723E0	1.4266188739416723E0	101.46231250725351E0	71.12082586354582E0	1.013400560262078E-8	4.837104364475714E-6	42.414567619363766E0	42.414567619363766E0	101.46231250725351E0	2.392157180943001E0	2.467761211799083E-7	7.716081310156594E-5	29.730833086607475E0	29.730833086607475E0	71.12082586354582E0	2.392157180943001E0
chr6:88044174-88045900	Rab7	ENSMUST00000113600.9	TSS	0.021639480306424482E0	0.9999999999998793E0	0.7036620211708341E0	-1.4211368098793857E0	72.75063684442655E0	103.38860796178206E0	0.35623741966622596E0	0.8565483502551655E0	0.8627559557646859E0	-1.1590763220100528E0	72.75063684442655E0	84.32354057752697E0	0.16479844153659826E0	0.8620384897188644E0	1.226094246679866E0	1.226094246679866E0	103.38860796178206E0	84.32354057752697E0
chr9:32709432-32719721	Gm27240	ENSMUST00000183616.1	TSS	0.0216990596752411E0	0.9999999999998793E0	1.2433949090104695E0	1.2433949090104695E0	249.12235875661597E0	200.35658578888257E0	0.15608073950222248E0	0.8565483502551655E0	0.8839579852541409E0	-1.1312754867104873E0	249.12235875661597E0	281.82601765285534E0	2.224463878206869E-4	0.017127736754733017E0	0.7109229568565799E0	-1.4066221808641606E0	200.35658578888257E0	281.82601765285534E0
chr2:30657187-30659627	Gm14486	ENSMUST00000144704.1	TTS	0.021753907077986506E0	0.9999999999998793E0	0.7214625768220593E0	-1.3860732796493183E0	85.04325516393088E0	117.87618359712351E0	0.09812750921401225E0	0.7470752206537613E0	1.3136578014918756E0	1.3136578014918756E0	85.04325516393088E0	64.7377536732551E0	1.0712112777202548E-4	0.009710485223656895E0	1.8208259772507571E0	1.8208259772507571E0	117.87618359712351E0	64.7377536732551E0
chr16:45305117-45306986	.	.	Intergenic	0.021813036569846428E0	0.9999999999998793E0	3.055361348117689E0	3.055361348117689E0	17.102300843567143E0	5.59747240833014E0	0.006498680625643409E0	0.17300892772212031E0	19.064857415644422E0	19.064857415644422E0	17.102300843567143E0	0.8970589430966934E0	0.10741265498318257E0	0.8172713356383702E0	6.239804475954923E0	6.239804475954923E0	5.59747240833014E0	0.8970589430966934E0
chr14:27267046-27269468	Arhgef3	ENSMUST00000049206.5	Intron 2	0.021829927712838777E0	0.9999999999998793E0	1.7121507876011124E0	1.7121507876011124E0	49.32795406538519E0	28.810519740786617E0	1.604348439176409E-6	3.3090990282844503E-4	6.4692390181746315E0	6.4692390181746315E0	49.32795406538519E0	7.625001012762646E0	0.001098632038482902E0	0.05411540360149136E0	3.7784283166079415E0	3.7784283166079415E0	28.810519740786617E0	7.625001012762646E0
chr10:95941472-95943308	Eea1	ENSMUST00000219207.1	Intron 1	0.021931879626120775E0	0.9999999999998793E0	1.6635497589265236E0	1.6635497589265236E0	53.99764049517862E0	32.45928786045024E0	1.5185776268022187E-5	0.002017407935172854E0	36.116449819231704E0	36.116449819231704E0	53.99764049517862E0	1.4950982382112579E0	2.337545019641017E-4	0.017795200698922754E0	21.71047161374805E0	21.71047161374805E0	32.45928786045024E0	1.4950982382112579E0
chr9:123937846-123938636	.	.	Intergenic	0.02195944375120416E0	0.9999999999998793E0	8.277424825662038E0	8.277424825662038E0	10.901801667120287E0	1.3170523317012848E0	0.22259429071716133E0	0.8565483502551655E0	1.8696656112664947E0	1.8696656112664947E0	10.901801667120287E0	5.830883127670892E0	0.12304994645306837E0	0.8551196207045192E0	0.22587527529939924E0	-4.427222052854138E0	1.3170523317012848E0	5.830883127670892E0
chr2:65833156-65833758	.	.	Intergenic	0.022089624981271316E0	0.9999999999998793E0	3.5051395306646933E0	3.5051395306646933E0	15.003469620277194E0	4.280420077152257E0	0.03400062168817254E0	0.46274906174214436E0	50.17553105467594E0	50.17553105467594E0	15.003469620277194E0	0.2990196477228714E0	0.1594437465556515E0	0.8620384897188644E0	14.314845561985646E0	14.314845561985646E0	4.280420077152257E0	0.2990196477228714E0
chr2:151572324-151572723	Sdcbp2	ENSMUST00000028950.8	TSS	0.02216780533060673E0	0.9999999999998793E0	3.3651170005951485E0	3.3651170005951485E0	15.51212316891309E0	4.609683159952431E0	0.01062012690062297E0	0.23594979445327785E0	4.71605470297983E0	4.71605470297983E0	15.51212316891309E0	3.2892161236195556E0	0.6400636600574665E0	0.90016801430686E0	1.4014534122129356E0	1.4014534122129356E0	4.609683159952431E0	3.2892161236195556E0
chr10:13377015-13377673	Phactr2	ENSMUST00000105546.7	Intron 1	0.02225771113712579E0	0.9999999999998793E0	3.6606433227656687E0	3.6606433227656687E0	14.463776468558143E0	3.9511569943477998E0	0.01577039157340832E0	0.29998226947598144E0	24.18532792142232E0	24.18532792142232E0	14.463776468558143E0	0.5980392953757204E0	0.1735878648190697E0	0.8620384897188644E0	6.606851798702409E0	6.606851798702409E0	3.9511569943477998E0	0.5980392953757204E0
chr1:85952402-85954452	Gpr55	ENSMUST00000086975.5	5' UTR Exon	0.022263085576195458E0	0.9999999999998793E0	3.300796243745505E0	3.300796243745505E0	15.75904003267838E0	4.774314701351017E0	0.005920080061072518E0	0.16395640055437194E0	10.540471274671933E0	10.540471274671933E0	15.75904003267838E0	1.4950982382112579E0	0.2153905580537761E0	0.8620384897188644E0	3.1933117030911813E0	3.1933117030911813E0	4.774314701351017E0	1.4950982382112579E0
chrX:166320503-166323348	Gpm6b	ENSMUST00000060210.13	Intron 1	0.022270907315907258E0	0.9999999999998793E0	2.9237893422150596E0	2.9237893422150596E0	17.809874009165856E0	6.091367032507587E0	0.0034520133224704565E0	0.11440216071731361E0	7.9414509607657555E0	7.9414509607657555E0	17.809874009165856E0	2.2426473571585888E0	0.2007968996031373E0	0.8620384897188644E0	2.7161501843184506E0	2.7161501843184506E0	6.091367032507587E0	2.2426473571585888E0
chr15:100041169-100042538	Dip2b	ENSMUST00000100203.9	Intron 1	0.022539980793588932E0	0.9999999999998793E0	2.004331531314177E0	2.004331531314177E0	32.3376665671709E0	16.133891056420246E0	0.22903104985274572E0	0.8565483502551655E0	1.3864823675371163E0	1.3864823675371163E0	32.3376665671709E0	23.32353250522331E0	0.25507331749731366E0	0.8620384897188644E0	0.6917430304696366E0	-1.4456235277442293E0	16.133891056420246E0	23.32353250522331E0
chr9:66877479-66878217	Rab8b	ENSMUST00000041139.8	Intron 1	0.022567067015709458E0	0.9999999999998793E0	0.27129832151821903E0	-3.685979310169986E0	3.8857906939079387E0	14.322944101395736E0	0.4303835439728102E0	0.8565483502551655E0	1.9992463961825473E0	1.9992463961825473E0	3.8857906939079387E0	1.9436277095847942E0	0.00897961234783524E0	0.22412256427534263E0	7.369180852260776E0	7.369180852260776E0	14.322944101395736E0	1.9436277095847942E0
chr6:13061271-13062739	.	.	Intergenic	0.02259996318072756E0	0.9999999999998793E0	1.9732782440384466E0	1.9732782440384466E0	33.46097540759661E0	16.957048763238006E0	6.09137529734047E-5	0.005910267988773033E0	7.993018824139373E0	7.993018824139373E0	33.46097540759661E0	4.186275066254386E0	0.010373037841984411E0	0.24543098093963836E0	4.050629376920066E0	4.050629376920066E0	16.957048763238006E0	4.186275066254386E0
chr10:118441455-118442521	AC153498.1	ENSMUST00000219775.1	TSS	0.02261453064137097E0	0.9999999999998793E0	3.5666685986745112E0	3.5666685986745112E0	14.67965372924616E0	4.1157885357505855E0	0.02137865711206704E0	0.3575472680077531E0	32.72840395169565E0	32.72840395169565E0	14.67965372924616E0	0.4485294715535804E0	0.15863434490625108E0	0.8620384897188644E0	9.176183053244298E0	9.176183053244298E0	4.1157885357505855E0	0.4485294715535804E0
chr2:30692010-30693139	.	.	Intergenic	0.022641136043564047E0	0.9999999999998793E0	0.49761213497303786E0	-2.009597294194168E0	15.974917293363285E0	32.10315056771848E0	0.30198179750473825E0	0.8565483502551655E0	1.5049100416435213E0	1.5049100416435213E0	15.974917293363285E0	10.615197487762778E0	0.0017743101802878706E0	0.07652945305005736E0	3.0242631476924533E0	3.0242631476924533E0	32.10315056771848E0	10.615197487762778E0
chr16:94568576-94571719	Dyrk1a	ENSMUST00000023614.4	TSS	0.022649386570135484E0	0.9999999999998793E0	0.8137037168457583E0	-1.2289485463780365E0	221.70594666211719E0	272.4652008737754E0	0.19783473144647465E0	0.8565483502551655E0	0.8879553772155502E0	-1.1261827178025536E0	221.70594666211719E0	249.6814055649311E0	0.3188820119795363E0	0.8620384897188644E0	1.0912514700776115E0	1.0912514700776115E0	272.4652008737754E0	249.6814055649311E0
chr18:89160312-89161285	.	.	Intergenic	0.022690669770591615E0	0.9999999999998793E0	6.710237747874209E0	6.710237747874209E0	11.047167839665654E0	1.6463154145567163E0	0.029476419697290968E0	0.428647859531662E0	4.925949594528456E0	4.925949594528456E0	11.047167839665654E0	2.242647357158587E0	0.7632685857299992E0	0.942411318162877E0	0.7340946445733592E0	-1.3622221703867348E0	1.6463154145567163E0	2.242647357158587E0
chr2:126673934-126676879	Gabpb1	ENSMUST00000130263.1	TSS	0.0226967210755707E0	0.9999999999998793E0	0.810963228594444E0	-1.2331015325234822E0	214.15024254148867E0	264.0689922681851E0	0.10490773004151134E0	0.7671826698371603E0	0.8597532856093093E0	-1.1631243715356057E0	214.15024254148867E0	249.08336627026657E0	0.5083321693898273E0	0.8721782434142846E0	1.0601630940769384E0	1.0601630940769384E0	264.0689922681851E0	249.08336627026657E0
chr2:18958403-18959087	Pip4k2a	ENSMUST00000006912.11	Intron 1	0.02271686223033549E0	0.9999999999998793E0	2.618896978496171E0	2.618896978496171E0	20.264193179403726E0	7.737682446386217E0	0.7126678987019018E0	0.9227694094956911E0	0.8935295506839261E0	-1.1191571663573736E0	20.264193179403726E0	22.678817017179888E0	0.00979964963452706E0	0.23712822005951942E0	0.34118545250948007E0	-2.930957321435662E0	7.737682446386217E0	22.678817017179888E0
chr3:37279448-37280799	.	.	Intergenic	0.02279737344095159E0	0.9999999999998793E0	3.348434937079133E0	3.348434937079133E0	15.435224141650075E0	4.609683159952437E0	0.011802273908662808E0	0.25054884047263E0	4.488646195648324E0	4.488646195648324E0	15.435224141650075E0	3.438725947394628E0	0.6808712865609005E0	0.9137550173573534E0	1.3405206551702649E0	1.3405206551702649E0	4.609683159952437E0	3.438725947394628E0
chr2:26496693-26499429	Notch1	ENSMUST00000131393.1	TTS	0.02285601263407939E0	0.9999999999998793E0	1.482375196876179E0	1.482375196876179E0	82.97554260091421E0	55.97472406160683E0	0.9351954994867802E0	0.9992704159845619E0	1.0127443130968887E0	1.0127443130968887E0	82.97554260091421E0	81.93138339842346E0	0.028021320996296464E0	0.4404618546640211E0	0.6831902714178253E0	-1.4637210771820555E0	55.97472406160683E0	81.93138339842346E0
chr2:12423591-12424813	.	.	Intergenic	0.022861860862739353E0	0.9999999999998793E0	4.334493088524178E0	4.334493088524178E0	12.844697013380035E0	2.963367745904848E0	0.016835986534930316E0	0.31146430723418594E0	17.182412069523743E0	17.182412069523743E0	12.844697013380035E0	0.7475491194954249E0	0.2872667758163645E0	0.8620384897188644E0	3.964111077951693E0	3.964111077951693E0	2.963367745904848E0	0.7475491194954249E0
chr16:45360083-45360602	.	.	Intergenic	0.02286186908080746E0	0.9999999999998793E0	4.334493088524227E0	4.334493088524227E0	12.84469701338004E0	2.9633677459048156E0	0.04209126950384738E0	0.5157913796647198E0	42.95603018462652E0	42.95603018462652E0	12.84469701338004E0	0.2990196477228711E0	0.23196144067725874E0	0.8620384897188644E0	9.910277697374722E0	9.910277697374722E0	2.9633677459048156E0	0.2990196477228711E0
chr4:134090683-134100820	Cd52	ENSMUST00000000696.6	TSS	0.022939120092676624E0	0.9999999999998793E0	1.2232044965838533E0	1.2232044965838533E0	283.33890455888354E0	231.63657863438866E0	0.5652778704368576E0	0.8680136059037894E0	1.0501286809235626E0	1.0501286809235626E0	283.33890455888354E0	269.81350924507063E0	0.08853343892521294E0	0.7634797071851862E0	0.8585062300345901E0	-1.164813911670401E0	231.63657863438866E0	269.81350924507063E0
chr8:120487185-120488204	Gse1	ENSMUST00000034279.15	TSS	0.022960352978237227E0	0.9999999999998793E0	1.9368377106240078E0	1.9368377106240078E0	34.75623897153872E0	17.94483801141036E0	0.015007490676202937E0	0.29097932721782355E0	2.057238302453831E0	2.057238302453831E0	34.75623897153872E0	16.894610084831783E0	0.8587998866212424E0	0.9677799761370617E0	1.0621634900897468E0	1.0621634900897468E0	17.94483801141036E0	16.894610084831783E0
chr1:97768455-97769170	Ppip5k2	ENSMUST00000112845.7	5' UTR Exon	0.023073097127515617E0	0.9999999999998793E0	3.0275030817873954E0	3.0275030817873954E0	16.946364966439422E0	5.597472408330143E0	0.005078276225554014E0	0.14815940378574194E0	14.16827046253808E0	14.16827046253808E0	16.946364966439422E0	1.1960785906259217E0	0.12551642199401256E0	0.860155154025425E0	4.679853357630055E0	4.679853357630055E0	5.597472408330143E0	1.1960785906259217E0
chr1:69760107-69760865	.	.	Intergenic	0.02307621740071763E0	0.9999999999998793E0	0.13907464463263908E0	-7.190383284037618E0	1.5111408256527388E0	10.865681732600255E0	0.7726880312652614E0	0.9441162047698859E0	1.443900175055487E0	1.443900175055487E0	1.5111408256527388E0	1.0465687668433643E0	0.02223360366885534E0	0.3864177569332311E0	10.38219568253796E0	10.38219568253796E0	10.865681732600255E0	1.0465687668433643E0
chr11:83063485-83066300	Slfn2	ENSMUST00000038038.7	TSS	0.02324007589323001E0	0.9999999999998793E0	1.462161684002868E0	1.462161684002868E0	87.86204508822235E0	60.09051259480959E0	0.9849855990836165E0	0.9998888456104917E0	1.0028453435189024E0	1.0028453435189024E0	87.86204508822235E0	87.6127566987763E0	0.024373375346491654E0	0.40687544394182823E0	0.6858648769768579E0	-1.4580131357765116E0	60.09051259480959E0	87.6127566987763E0
chr5:99251932-99253509	Rasgef1b	ENSMUST00000031276.14	TSS	0.023300654785596047E0	0.9999999999998793E0	1.6375103596166607E0	1.6375103596166607E0	55.804271884623354E0	34.07872906384976E0	1.8702322640992157E-4	0.013952113763843341E0	2.574125484324395E0	2.574125484324395E0	55.804271884623354E0	21.678924444225277E0	0.09966033346938662E0	0.7998151215686338E0	1.5719750835206898E0	1.5719750835206898E0	34.07872906384976E0	21.678924444225277E0
chr8:117321266-117322138	Cmip	ENSMUST00000211913.1	Intron 1	0.023302269275050656E0	0.9999999999998793E0	0.3516601728010099E0	-2.84365440656784E0	6.368379192262258E0	18.10946955277151E0	0.09332935281662323E0	0.7351971184997942E0	5.32438189444526E0	5.32438189444526E0	6.368379192262258E0	1.196078590625921E0	0.003998419281054833E0	0.13293182072721904E0	15.140702036389287E0	15.140702036389287E0	18.10946955277151E0	1.196078590625921E0
chr1:171996428-171997853	.	.	Intergenic	0.023414717278695426E0	0.9999999999998793E0	7.2848623329981885E0	7.2848623329981885E0	10.793863036770894E0	1.4816838731293536E0	0.0277918787262847E0	0.41368750294473705E0	5.5534622106600455E0	5.5534622106600455E0	10.793863036770894E0	1.9436277095847945E0	0.8034906262401061E0	0.9545174889535161E0	0.7623290539760194E0	-1.311769497416344E0	1.4816838731293536E0	1.9436277095847945E0
chr3:146191848-146192482	Mcoln2	ENSMUST00000169984.1	TSS	0.023481997784512376E0	0.9999999999998793E0	2.015222970033603E0	2.015222970033603E0	31.518080061667455E0	15.639996432326248E0	1.2199471414710691E-4	0.010081145684533594E0	6.587794547207399E0	6.587794547207399E0	31.518080061667455E0	4.784314361325693E0	0.02338153971606523E0	0.39732779360288356E0	3.2690152132880614E0	3.2690152132880614E0	15.639996432326248E0	4.784314361325693E0
chr9:95277511-95278547	.	.	Intergenic	0.023504250514949015E0	0.9999999999998793E0	5.396401866960289E0	5.396401866960289E0	11.549433449212897E0	2.1402100388269485E0	0.018667655447372124E0	0.32876545416407316E0	11.035522762682872E0	11.035522762682872E0	11.549433449212897E0	1.046568766843365E0	0.5486667287531408E0	0.8779027527044185E0	2.0449779380309594E0	2.0449779380309594E0	2.1402100388269485E0	1.046568766843365E0
chr10:68540632-68541066	Cabcoco1	ENSMUST00000020103.8	Intron 1	0.023523891376811108E0	0.9999999999998793E0	3.540443094276904E0	3.540443094276904E0	14.57171509890222E0	4.115788535750588E0	0.00908301162245808E0	0.2145886361693869E0	6.49755078630125E0	6.49755078630125E0	14.57171509890222E0	2.2426473571585905E0	0.46444429917218566E0	0.8659354711340131E0	1.8352366111474818E0	1.8352366111474818E0	4.115788535750588E0	2.2426473571585905E0
chr6:15722286-15723687	Mdfic	ENSMUST00000189359.6	Intron 2	0.02354126626108301E0	0.9999999999998793E0	6.139152166270027E0	6.139152166270027E0	11.117678927818526E0	1.8109469559822475E0	0.020693786073665083E0	0.3510458853789076E0	8.262317666155905E0	8.262317666155905E0	11.117678927818526E0	1.3455884144177546E0	0.7941175526410651E0	0.9526298058177018E0	1.3458401815728005E0	1.3458401815728005E0	1.8109469559822475E0	1.3455884144177546E0
chr3:37286820-37288269	.	.	Intergenic	0.023557792800131958E0	0.9999999999998793E0	10.818020563250853E0	10.818020563250853E0	10.685924406421325E0	0.9877892488688493E0	0.02313484193513622E0	0.373596527555232E0	8.934132330576425E0	8.934132330576425E0	10.685924406421325E0	1.196078590625921E0	0.8880818344113445E0	0.9835128403122494E0	0.8258564751601551E0	-1.2108641514326977E0	0.9877892488688493E0	1.196078590625921E0
chr2:172398717-172400769	Cass4	ENSMUST00000109136.2	Intron 1	0.02362067474261732E0	0.9999999999998793E0	0.6334991974284411E0	-1.5785339650930785E0	40.153170487879706E0	63.38314342129112E0	1.0777485933411865E-5	0.001541909469621934E0	8.66340104798164E0	8.66340104798164E0	40.153170487879706E0	4.634804537559116E0	5.468074873032863E-8	2.160650698822982E-5	13.675472807461988E0	13.675472807461988E0	63.38314342129112E0	4.634804537559116E0
chr10:67702431-67703482	.	.	Intergenic	0.02365095477661437E0	0.9999999999998793E0	0.2126392249824938E0	-4.702801188643949E0	2.590527129449419E0	12.182734063589125E0	0.48450649319869243E0	0.8585542164272054E0	2.1658502624762876E0	2.1658502624762876E0	2.590527129449419E0	1.196078590625921E0	0.01542762699831122E0	0.3127065778257847E0	10.185563188798298E0	10.185563188798298E0	12.182734063589125E0	1.196078590625921E0
chr16:24910601-24914176	Lpp	ENSMUST00000078988.8	Intron 9	0.023657745303587694E0	0.9999999999998793E0	0.6026004225897962E0	-1.659474441956578E0	31.982310381217324E0	53.07382667235268E0	9.759519468939864E-4	0.047401559823185495E0	3.395467317940627E0	3.395467317940627E0	31.982310381217324E0	9.419118897782472E0	1.0098343985058541E-6	2.4100412847350003E-4	5.6346912326213205E0	5.6346912326213205E0	53.07382667235268E0	9.419118897782472E0
chr13:5845029-5845898	.	.	Intergenic	0.02371213774848234E0	0.9999999999998793E0	2.055313406978716E0	2.055313406978716E0	30.114877867372712E0	14.652207184130226E0	0.025250805369706465E0	0.39215089658023977E0	2.034586610251052E0	2.034586610251052E0	30.114877867372712E0	14.801472552528386E0	0.978058230762657E0	0.9998571342969699E0	0.9899155055101146E0	-1.0101872275297765E0	14.652207184130226E0	14.801472552528386E0
chr1:40022294-40023383	Map4k4	ENSMUST00000191657.1	TSS	0.023825801931344277E0	0.9999999999998793E0	0.35827366554527007E0	-2.791162444155818E0	6.584256452979841E0	18.377729334247928E0	0.11154901547572722E0	0.7825915027583987E0	4.003541393903083E0	4.003541393903083E0	6.584256452979841E0	1.6446080620040247E0	0.003023019543155291E0	0.11043081177744352E0	11.174534382285517E0	11.174534382285517E0	18.377729334247928E0	1.6446080620040247E0
chr2:18942471-18944785	Pip4k2a	ENSMUST00000006912.11	Intron 1	0.02392081134862332E0	0.9999999999998793E0	1.7428341535094625E0	1.7428341535094625E0	45.33422474345112E0	26.011783537844803E0	0.9801096269574916E0	0.9998888456104917E0	1.0052572666290713E0	1.0052572666290713E0	45.33422474345112E0	45.097137069668086E0	0.025421196701380676E0	0.41517952335625097E0	0.5767945645343434E0	-1.733719527692356E0	26.011783537844803E0	45.097137069668086E0
chr9:95278744-95280400	.	.	Intergenic	0.02402241222233114E0	0.9999999999998793E0	1.5982466109975335E0	1.5982466109975335E0	60.18589248302638E0	37.657450401513316E0	8.477397574269449E-7	1.925225912692986E-4	4.328545897060912E0	4.328545897060912E0	60.18589248302638E0	13.904413610097718E0	0.0014990241154662258E0	0.0681433748030713E0	2.7083091353212896E0	2.7083091353212896E0	37.657450401513316E0	13.904413610097718E0
chr11:103809751-103810356	Wnt3	ENSMUST00000000127.5	Intron 2	0.02405027896705388E0	0.9999999999998793E0	2.698787371730136E0	2.698787371730136E0	19.10513757324229E0	7.0791562808426765E0	0.0038151183888576064E0	0.12263059176437323E0	18.255023633914437E0	18.255023633914437E0	19.10513757324229E0	1.0465687668433634E0	0.06794831672097362E0	0.6829992285147833E0	6.764157793658093E0	6.764157793658093E0	7.0791562808426765E0	1.0465687668433634E0
chr1:138597577-138599484	Nek7	ENSMUST00000187407.6	5' UTR Exon	0.024057484104953758E0	0.9999999999998793E0	2.8883494714062783E0	2.8883494714062783E0	17.5939967484849E0	6.0913670325075815E0	0.003579460881198356E0	0.11732822353008515E0	9.8064886860464E0	9.8064886860464E0	17.5939967484849E0	1.7941178857952802E0	0.15014722652330298E0	0.8620384897188644E0	3.3951877302686024E0	3.3951877302686024E0	6.0913670325075815E0	1.7941178857952802E0
chr13:41656123-41657571	Gm5082	ENSMUST00000221920.1	TTS	0.02408396795903797E0	0.9999999999998793E0	3.6060068552708544E0	3.6060068552708544E0	14.247899207869576E0	3.951156994347807E0	0.012986278299726409E0	0.26708652031008334E0	19.05948229527249E0	19.05948229527249E0	14.247899207869576E0	0.7475491194954242E0	0.18680869436227926E0	0.8620384897188644E0	5.285481437012103E0	5.285481437012103E0	3.951156994347807E0	0.7475491194954242E0
chr12:100879632-100881084	Gpr68	ENSMUST00000135684.1	TTS	0.02415602570698271E0	0.9999999999998793E0	1.8553942792432823E0	1.8553942792432823E0	37.994397881358914E0	20.47780264626817E0	2.3136428269397607E-5	0.0028201083917567546E0	12.706321536217768E0	12.706321536217768E0	37.994397881358914E0	2.9901964760659228E0	0.0018851062622107927E0	0.07952759789732688E0	6.848313416919668E0	6.848313416919668E0	20.47780264626817E0	2.9901964760659228E0
chr14:62870067-62870951	Wdfy2	ENSMUST00000224948.1	Intron 1	0.02424883200818175E0	0.9999999999998793E0	0.2993128221048065E0	-3.3409861728203647E0	4.533422476107923E0	15.146101808229629E0	0.5367648996476196E0	0.863612532886662E0	1.5958896671893499E0	1.5958896671893499E0	4.533422476107923E0	2.8406866522872467E0	0.009638539082132955E0	0.2345338619205052E0	5.331845311426512E0	5.331845311426512E0	15.146101808229629E0	2.8406866522872467E0
chr4:155308551-155310014	Prkcz	ENSMUST00000123652.7	5' UTR Exon	0.024269903577322654E0	0.9999999999998793E0	3.784817112526079E0	3.784817112526079E0	13.708206056145729E0	3.6218939115387108E0	0.011963460493002166E0	0.2529542209766701E0	6.112510739768686E0	6.112510739768686E0	13.708206056145729E0	2.2426473571585883E0	0.5726705387270694E0	0.88158641876383E0	1.615008217844652E0	1.615008217844652E0	3.6218939115387108E0	2.2426473571585883E0
chr7:63935133-63940412	Klf13	ENSMUST00000063694.9	TSS	0.02430577776096363E0	0.9999999999998793E0	0.8404028686434922E0	-1.1899055052181295E0	308.81242130711826E0	367.4576001930804E0	1.9614762850785378E-4	0.014447945961075992E0	0.7552099454140194E0	-1.3241351045129344E0	308.81242130711826E0	408.9093677623933E0	0.137025329794874E0	0.8620384897188644E0	0.8986284716436248E0	-1.1128069403042204E0	367.4576001930804E0	408.9093677623933E0
chr12:16008294-16009163	Gm36235	ENSMUST00000223158.1	Intron 2	0.024335283604809868E0	0.9999999999998793E0	2.6672530046543583E0	2.6672530046543583E0	19.321014833920252E0	7.243787822229487E0	0.44597137286606703E0	0.8565483502551655E0	0.7928163538931181E0	-1.2613261508664753E0	19.321014833920252E0	24.370101271302705E0	0.004146264951572283E0	0.13661271811880174E0	0.29724077637541435E0	-3.364275965747723E0	7.243787822229487E0	24.370101271302705E0
chr4:141766329-141766981	Dnajc16	ENSMUST00000038014.10	CDS Exon 13	0.02439431898153529E0	0.9999999999998793E0	5.345968204660729E0	5.345968204660729E0	11.441494818864566E0	2.1402100388269476E0	0.020235381924688527E0	0.3458804237619911E0	12.75445154068465E0	12.75445154068465E0	11.441494818864566E0	0.8970589430966934E0	0.48935746795154766E0	0.868406617166513E0	2.3858075941351555E0	2.3858075941351555E0	2.1402100388269476E0	0.8970589430966934E0
chr2:98662138-98662749	Gm10801	ENSMUST00000099684.3	TSS	0.024408917834949615E0	0.9999999999998793E0	0.6628298734688027E0	-1.5086827556016404E0	49.80634869500993E0	75.14197939564374E0	0.09351843555898665E0	0.7351971184997942E0	0.7314664225882525E0	-1.3671167522106575E0	49.80634869500993E0	68.0910936673935E0	0.5559251306886723E0	0.8786340291477234E0	1.1035507780605187E0	1.1035507780605187E0	75.14197939564374E0	68.0910936673935E0
chr17:80171788-80174154	Galm	ENSMUST00000133955.1	Intron 2	0.024470417620095358E0	0.9999999999998793E0	1.629637713658293E0	1.629637713658293E0	55.804271884623354E0	34.243360605193104E0	9.804417465605554E-7	2.171728799316772E-4	19.644641847312236E0	19.644641847312236E0	55.804271884623354E0	2.8406866522872467E0	5.53699217685833E-5	0.005810233045663801E0	12.0546067893906E0	12.0546067893906E0	34.243360605193104E0	2.8406866522872467E0
chr6:18514030-18515166	Cttnbp2	ENSMUST00000139557.1	TSS	0.024472489997382465E0	0.9999999999998793E0	3.9993894212304615E0	3.9993894212304615E0	13.168512904418293E0	3.29263082872456E0	0.01277807991703756E0	0.26419185798866623E0	6.775223896777744E0	6.775223896777744E0	13.168512904418293E0	1.9436277095847945E0	0.5600596086053486E0	0.8786340291477234E0	1.6940645641587118E0	1.6940645641587118E0	3.29263082872456E0	1.9436277095847945E0
chr10:118881337-118883684	Gm10744	ENSMUST00000220184.1	TSS	0.02451503723196517E0	0.9999999999998793E0	1.5022376310123529E0	1.5022376310123529E0	76.42055027510654E0	50.87114628037042E0	0.47482959826038307E0	0.8585542164272054E0	0.8936025559913704E0	-1.11906573374848E0	76.42055027510654E0	85.51961916707468E0	0.0033499130272327026E0	0.11790054420446112E0	0.5948476709301808E0	-1.6811026568134169E0	50.87114628037042E0	85.51961916707468E0
chr12:86831790-86837413	.	.	Intergenic	0.024560713799735436E0	0.9999999999998793E0	0.7402625148024818E0	-1.3508721298238664E0	97.25270592521488E0	131.37596998432917E0	0.0221957055795572E0	0.36454283617289496E0	0.736667076961223E0	-1.3574653072932679E0	97.25270592521488E0	132.01717433387364E0	0.9684848149545671E0	0.9998571342969699E0	0.9951430232257292E0	-1.0048806821340384E0	131.37596998432917E0	132.01717433387364E0
chr13:45852807-45854050	Atxn1	ENSMUST00000180110.8	5' UTR Exon	0.024613146359654028E0	0.9999999999998793E0	6.556376099823634E0	6.556376099823634E0	10.7938630367709E0	1.6463154145567174E0	0.03226193340007937E0	0.448825321339536E0	4.813000582689297E0	4.813000582689297E0	10.7938630367709E0	2.2426473571585888E0	0.7632685857299992E0	0.942411318162877E0	0.7340946445733592E0	-1.3622221703867348E0	1.6463154145567174E0	2.2426473571585888E0
chr1:40086034-40087916	Il1r2	ENSMUST00000194913.1	TSS	0.02462076583345108E0	0.9999999999998793E0	0.4805525666201065E0	-2.0809377984043413E0	13.924083316835727E0	28.975151282134764E0	0.01580317307945192E0	0.3004468962988574E0	4.656578063778284E0	4.656578063778284E0	13.924083316835727E0	2.990196476065928E0	1.8483304117301625E-4	0.014857298547285232E0	9.690049304136734E0	9.690049304136734E0	28.975151282134764E0	2.990196476065928E0
chr16:23177667-23181675	Gm6630	ENSMUST00000119199.1	TSS	0.024639332171295582E0	0.9999999999998793E0	1.4374232161785638E0	1.4374232161785638E0	93.47485386437498E0	65.02945883459493E0	0.3557561093009891E0	0.8565483502551655E0	0.8773284013685095E0	-1.1398240367462629E0	93.47485386437498E0	106.54488526595888E0	0.001704546473917644E0	0.07450346101333793E0	0.6103480112843284E0	-1.6384095327774464E0	65.02945883459493E0	106.54488526595888E0
chrY:90770421-90773233	.	.	Intergenic	0.02465438711537123E0	0.9999999999998793E0	0.7693837063403909E0	-1.2997415876618263E0	129.9581109081192E0	168.91196140125055E0	0.598205899079288E0	0.8851240284943289E0	0.9376784309319042E0	-1.066463690549177E0	129.9581109081192E0	138.59560657587204E0	0.08435017712797016E0	0.7496380505293726E0	1.2187396525356833E0	1.2187396525356833E0	168.91196140125055E0	138.59560657587204E0
chr6:50388676-50395300	Osbpl3	ENSMUST00000146341.3	5' UTR Exon	0.024658094083501968E0	0.9999999999998793E0	0.7320993690590845E0	-1.365934792820856E0	89.91287906411401E0	122.81512983636723E0	5.842061281156616E-11	6.564590381064663E-8	11.565085052270277E0	11.565085052270277E0	89.91287906411401E0	7.774510836516824E0	8.551273743720123E-14	3.5478905867550803E-10	15.797152054828377E0	15.797152054828377E0	122.81512983636723E0	7.774510836516824E0
chr2:29683670-29684510	Rapgef1	ENSMUST00000095087.10	Intron 3	0.02471694177025424E0	0.9999999999998793E0	0.3603053534104597E0	-2.7754236525617215E0	6.584256452979857E0	18.27410109413244E0	0.304006769101012E0	0.8565483502551655E0	2.0017706971879767E0	2.0017706971879767E0	6.584256452979857E0	3.2892161236195583E0	0.004196715907792687E0	0.1375189353345445E0	5.555761739980477E0	5.555761739980477E0	18.27410109413244E0	3.2892161236195583E0
chrX:42481597-42482858	.	.	Intergenic	0.024759289211231734E0	0.9999999999998793E0	0.15894245100482363E0	-6.29158537368756E0	1.7270180864178173E0	10.865681732600217E0	0.4211309663437455E0	0.8565483502551655E0	3.850400466296919E0	3.850400466296919E0	1.7270180864178173E0	0.4485294715535805E0	0.036447321102029175E0	0.5076413000954413E0	24.225123256593452E0	24.225123256593452E0	10.865681732600217E0	0.4485294715535805E0
chr4:145314307-145315723	Tnfrsf8	ENSMUST00000123027.1	TSS	0.0247937762037869E0	0.9999999999998793E0	0.4613746146393013E0	-2.1674361099857897E0	12.305003861646547E0	26.670309703247312E0	0.033544748847753346E0	0.4594429523176357E0	3.741014089431653E0	3.741014089431653E0	12.305003861646547E0	3.2892161236195623E0	3.4204102603573863E-4	0.02356129731899951E0	8.108409025399773E0	8.108409025399773E0	26.670309703247312E0	3.2892161236195623E0
chrX:166306532-166308498	Gpm6b	ENSMUST00000060210.13	Intron 1	0.024832773649147634E0	0.9999999999998793E0	2.461733668079453E0	2.461733668079453E0	21.479787440677963E0	8.72547169468403E0	0.0025409209814553162E0	0.0929456659995013E0	20.524009621904543E0	20.524009621904543E0	21.479787440677963E0	1.0465687668433634E0	0.04035840917043193E0	0.5342617732200965E0	8.337217745377208E0	8.337217745377208E0	8.72547169468403E0	1.0465687668433634E0
chr13:45930585-45932294	Atxn1	ENSMUST00000180110.8	5' UTR Exon	0.025013990900747022E0	0.9999999999998793E0	3.16525389977011E0	3.16525389977011E0	15.759040032678373E0	4.978760166387581E0	0.005819669595936379E0	0.16213461217005293E0	9.58224661350333E0	9.58224661350333E0	15.759040032678373E0	1.644608062004028E0	0.2181048670711745E0	0.8620384897188644E0	3.027323215429663E0	3.027323215429663E0	4.978760166387581E0	1.644608062004028E0
chr19:29521703-29523255	Ric1	ENSMUST00000043610.12	TSS	0.025100296097919632E0	0.9999999999998793E0	0.7517333449718551E0	-1.3302589364815791E0	107.91786478847105E0	143.55870404087435E0	0.7591945318062294E0	0.9391810978157499E0	1.0430797641640825E0	1.0430797641640825E0	107.91786478847105E0	103.46079800997362E0	0.011089954896615538E0	0.25622332502947265E0	1.3875661777423687E0	1.3875661777423687E0	143.55870404087435E0	103.46079800997362E0
chr11:108200854-108202059	Prkca	ENSMUST00000134725.1	Intron 2	0.025248110547264987E0	0.9999999999998793E0	2.355850395600555E0	2.355850395600555E0	22.882989635050585E0	9.713260942962908E0	0.0020284409242973048E0	0.07922302962589542E0	21.864774069332977E0	21.864774069332977E0	22.882989635050585E0	1.0465687668433643E0	0.030345114317108242E0	0.4590987150505969E0	9.281053716383886E0	9.281053716383886E0	9.713260942962908E0	1.0465687668433643E0
chr14:73237663-73239734	Lpar6	ENSMUST00000044405.7	TSS	0.025318180153319093E0	0.9999999999998793E0	1.5354284268690193E0	1.5354284268690193E0	68.97278478340063E0	44.92087262188249E0	0.40398165239302514E0	0.8565483502551655E0	1.1591108189987962E0	1.1591108189987962E0	68.97278478340063E0	59.50490984371725E0	0.15489133831341098E0	0.8620384897188644E0	0.7549103551263577E0	-1.324660594743887E0	44.92087262188249E0	59.50490984371725E0
chr12:16303335-16305753	.	.	Intergenic	0.025351412707711258E0	0.9999999999998793E0	1.7693234136333125E0	1.7693234136333125E0	42.52782035502976E0	24.036205041620242E0	2.1062996847930806E-5	0.0026146474786845294E0	20.317738169124173E0	20.317738169124173E0	42.52782035502976E0	2.0931375333725444E0	7.068461585646187E-4	0.039936824695322615E0	11.483337649051746E0	11.483337649051746E0	24.036205041620242E0	2.0931375333725444E0
chr11:98940629-98946168	Gm22061	ENSMUST00000082557.1	TSS	0.025396496950665846E0	0.9999999999998793E0	1.2548829495145384E0	1.2548829495145384E0	218.57572638357615E0	174.18017072280242E0	1.7884143661236657E-6	3.619542643843493E-4	0.6595603131899604E0	-1.5161615700670414E0	218.57572638357615E0	331.39611649226686E0	6.326177606837641E-12	1.1765926844524084E-8	0.5255950871315263E0	-1.9026053029863224E0	174.18017072280242E0	331.39611649226686E0
chr6:140707323-140709814	.	.	Intergenic	0.025487650374844985E0	0.9999999999998793E0	1.6407413560046076E0	1.6407413560046076E0	53.753437908625905E0	32.76167673345034E0	0.0012378932675986293E0	0.05627691523032314E0	0.5752498298502052E0	-1.73837513391425E0	53.753437908625905E0	93.44363982275887E0	2.447260556237301E-7	7.696598775014179E-5	0.35060360229536985E0	-2.8522239744631577E0	32.76167673345034E0	93.44363982275887E0
chr1:82835283-82837393	.	.	Intergenic	0.0255592643295111E0	0.9999999999998793E0	1.5163261809204693E0	1.5163261809204693E0	72.39418374797013E0	47.743146994945405E0	4.178224386088084E-8	1.5908904880159352E-5	22.009555172770266E0	22.009555172770266E0	72.39418374797013E0	3.2892161236195547E0	2.6983439726429644E-6	5.420455481581275E-4	14.515053192189564E0	14.515053192189564E0	47.743146994945405E0	3.2892161236195547E0
chr4:63937922-63938890	.	.	Intergenic	0.02556059335230459E0	0.9999999999998793E0	2.622550440338024E0	2.622550440338024E0	19.428953464259045E0	7.408419363615678E0	0.0057104354521546885E0	0.15979294514404221E0	25.990203128555706E0	25.990203128555706E0	19.428953464259045E0	0.7475491194954246E0	0.05876018266051763E0	0.6392543425608725E0	9.910277693345638E0	9.910277693345638E0	7.408419363615678E0	0.7475491194954246E0
chr11:118768645-118770380	Rbfox3	ENSMUST00000017576.10	5' UTR Exon	0.02560783079208826E0	0.9999999999998793E0	0.2905666682135889E0	-3.4415509739917E0	4.209606585010034E0	14.48757564276316E0	0.6941381558958883E0	0.9142030303008035E0	1.3407644483243795E0	1.3407644483243795E0	4.209606585010034E0	3.13970629984334E0	0.014034450663438613E0	0.29606007372819726E0	4.614309193024213E0	4.614309193024213E0	14.48757564276316E0	3.13970629984334E0
chr15:100018339-100019558	.	.	Intergenic	0.025721883008245825E0	0.9999999999998793E0	0.4085126648732346E0	-2.4479045228874594E0	8.74302906009554E0	21.402100379944365E0	0.11957353797353139E0	0.802136885094521E0	2.7846646230992285E0	2.7846646230992285E0	8.74302906009554E0	3.1397062998433443E0	0.0014938370156623649E0	0.06800931369297228E0	6.816593125609303E0	6.816593125609303E0	21.402100379944365E0	3.1397062998433443E0
chr7:137154368-137156061	.	.	Intergenic	0.025752135856138038E0	0.9999999999998793E0	0.3026019739955095E0	-3.3046711057305913E0	4.533422476107918E0	14.981470266863472E0	0.1609147093002735E0	0.8565483502551655E0	5.0536506112500295E0	5.0536506112500295E0	4.533422476107918E0	0.8970589430966951E0	0.00959345426872898E0	0.23402865045920426E0	16.700653153455715E0	16.700653153455715E0	14.981470266863472E0	0.8970589430966951E0
chr19:47147776-47149190	.	.	Intergenic	0.025865553410674372E0	0.9999999999998793E0	3.4042722060580313E0	3.4042722060580313E0	14.57171509890222E0	4.280420077152263E0	0.008001714870652528E0	0.19686764142509533E0	8.860296526301802E0	8.860296526301802E0	14.57171509890222E0	1.6446080620040273E0	0.2971150271141546E0	0.8620384897188644E0	2.6026991938349022E0	2.6026991938349022E0	4.280420077152263E0	1.6446080620040273E0
chr5:64486580-64488741	.	.	Intergenic	0.025916523714623763E0	0.9999999999998793E0	1.5306158025873127E0	1.5306158025873127E0	69.29660067434698E0	45.27367387505723E0	0.41936664703181326E0	0.8565483502551655E0	1.1529650652355232E0	1.1529650652355232E0	69.29660067434698E0	60.10294913852514E0	0.14993242579606428E0	0.8620384897188644E0	0.7532687584216636E0	-1.3275474242358283E0	45.27367387505723E0	60.10294913852514E0
chr8:47172032-47173612	.	.	Intergenic	0.02592933375281612E0	0.9999999999998793E0	2.9696527044380745E0	2.9696527044380745E0	16.62254907541511E0	5.597472408330143E0	0.016969501913253925E0	0.3128077716829188E0	37.06010447393622E0	37.06010447393622E0	16.62254907541511E0	0.4485294715535808E0	0.1038392057802811E0	0.8080498247426106E0	12.479608951764222E0	12.479608951764222E0	5.597472408330143E0	0.4485294715535808E0
chr15:12229504-12230171	Mtmr12	ENSMUST00000173071.1	Intron 1	0.02595677634076801E0	0.9999999999998793E0	0.3209892467177333E0	-3.1153691602615114E0	5.073115627929156E0	15.804627973691206E0	0.6031101105231471E0	0.8880918855573511E0	0.7376446547545717E0	-1.355666300236011E0	5.073115627929156E0	6.877451893984207E0	0.0685420731699838E0	0.6849549270663685E0	2.298035408654143E0	2.298035408654143E0	15.804627973691206E0	6.877451893984207E0
chr2:11266697-11267621	Prkcq	ENSMUST00000195628.1	Intron 5	0.025974122673695706E0	0.9999999999998793E0	3.523078304890418E0	3.523078304890418E0	14.139960577525104E0	4.0135243539427705E0	0.8279634880713196E0	0.963651722109486E0	1.0870742698116838E0	1.0870742698116838E0	14.139960577525104E0	13.007354667657252E0	0.03946945948668937E0	0.5281182092790427E0	0.308558077832873E0	-3.2408809616115084E0	4.0135243539427705E0	13.007354667657252E0
chr12:76536342-76538288	Plekhg3	ENSMUST00000217730.1	5' UTR Exon	0.025991008556857542E0	0.9999999999998793E0	0.32443922984703794E0	-3.0822413198042233E0	5.181054258292212E0	15.96925951505588E0	0.6685320845734851E0	0.9052495148319469E0	1.3328309308800126E0	1.3328309308800126E0	5.181054258292212E0	3.887255418713444E0	0.012480972167987586E0	0.2758369003641313E0	4.108106567471501E0	4.108106567471501E0	15.96925951505588E0	3.887255418713444E0
chr3:89868319-89876404	Il6ra	ENSMUST00000029559.6	TTS	0.02603348855596448E0	0.9999999999998793E0	1.2541011348960738E0	1.2541011348960738E0	217.8201559715128E0	173.68627609890757E0	0.008738561289097977E0	0.20943230880667987E0	0.78851325136103E0	-1.2682095047533175E0	217.8201559715128E0	276.2415921299226E0	1.65540053622157E-6	3.6486312469642576E-4	0.6287477376586327E0	-1.590462979197123E0	173.68627609890757E0	276.2415921299226E0
chr13:112389390-112390756	.	.	Intergenic	0.026066279346918977E0	0.9999999999998793E0	3.5513703877759077E0	3.5513703877759077E0	14.032021947180459E0	3.951156994347806E0	0.010779365616346548E0	0.23813280916079277E0	6.256900757218864E0	6.256900757218864E0	14.032021947180459E0	2.2426473571585888E0	0.49814905223488215E0	0.8692466617758743E0	1.7618271467137312E0	1.7618271467137312E0	3.951156994347806E0	2.2426473571585888E0
chr1:138579165-138580617	Nek7	ENSMUST00000187407.6	5' UTR Exon	0.026078761581326635E0	0.9999999999998793E0	4.071854630748591E0	4.071854630748591E0	12.736758383033655E0	3.1279992873154367E0	0.015469917550763216E0	0.29626573324144E0	6.0850078793015046E0	6.0850078793015046E0	12.736758383033655E0	2.0931375333725457E0	0.6528078572977742E0	0.9067821669732761E0	1.4944069548432783E0	1.4944069548432783E0	3.1279992873154367E0	2.0931375333725457E0
chr11:80502614-80506330	Myo1d	ENSMUST00000041065.13	Intron 21	0.026101783932647123E0	0.9999999999998793E0	0.7121040072820528E0	-1.404289246758748E0	73.50620725659634E0	103.2239764204581E0	3.793339992585287E-9	2.0984562308725775E-6	6.924619851993765E0	6.924619851993765E0	73.50620725659634E0	10.615197487762758E0	1.7131291747029528E-12	3.771436397198605E-9	9.724169196046997E0	9.724169196046997E0	103.2239764204581E0	10.615197487762758E0
chr2:135885042-135885992	Plcb4	ENSMUST00000134310.7	Intron 3	0.02610290069510712E0	0.9999999999998793E0	0.3375559973881E0	-2.962471435073526E0	5.612808779740698E0	16.627785680511714E0	0.10682222679490393E0	0.7734764474074887E0	6.256900756560103E0	6.256900756560103E0	5.612808779740698E0	0.8970589430966919E0	0.007068351712576788E0	0.19269701165681846E0	18.53588976339924E0	18.53588976339924E0	16.627785680511714E0	0.8970589430966919E0
chr14:73048862-73049720	Cysltr2	ENSMUST00000226727.1	TSS	0.026200926763455576E0	0.9999999999998793E0	0.3609014368646395E0	-2.7708396195027127E0	6.4763178226211995E0	17.94483801141036E0	0.14112562978434998E0	0.8429267025884101E0	3.332077326683461E0	3.332077326683461E0	6.4763178226211995E0	1.943627709584794E0	0.0032458644132337153E0	0.11569163889682103E0	9.232651872021215E0	9.232651872021215E0	17.94483801141036E0	1.943627709584794E0
chr1:58728466-58729995	Cflar	ENSMUST00000123032.1	TSS	0.02625761038278864E0	0.9999999999998793E0	2.086846539495844E0	2.086846539495844E0	28.171982521407937E0	13.499786394553926E0	3.804179556644404E-4	0.023970108721606414E0	5.542028611994594E0	5.542028611994594E0	28.171982521407937E0	5.083334008856506E0	0.06053387778935139E0	0.6494252609418899E0	2.6556953312597096E0	2.6556953312597096E0	13.499786394553926E0	5.083334008856506E0
chr2:172394448-172395513	Cass4	ENSMUST00000109136.2	Intron 1	0.026287482975550718E0	0.9999999999998793E0	0.4212900529610519E0	-2.3736615497362568E0	9.390660842211542E0	22.290250567771427E0	0.03379496240695697E0	0.46099696253485956E0	7.851207199768785E0	7.851207199768785E0	9.390660842211542E0	1.1960785906259221E0	0.0018304337741996972E0	0.07804521048389088E0	18.63610864910363E0	18.63610864910363E0	22.290250567771427E0	1.1960785906259221E0
chr3:27153262-27154864	1700125G22Rik	ENSMUST00000181124.1	TSS	0.026296031760645596E0	0.9999999999998793E0	0.5612257943784632E0	-1.781814039939955E0	23.098866895722022E0	41.15788534150175E0	0.2696906903941065E0	0.8565483502551655E0	1.4305307290370055E0	1.4305307290370055E0	23.098866895722022E0	16.14706096615733E0	0.001440881992292044E0	0.06642250004840575E0	2.5489397375636758E0	2.5489397375636758E0	41.15788534150175E0	16.14706096615733E0
chr13:36726466-36727256	AC156802.1	ENSMUST00000223623.1	TSS	0.02638596838169216E0	0.9999999999998793E0	2.1071196867767323E0	2.1071196867767323E0	27.578975565672092E0	13.08847130931596E0	2.632976547526885E-4	0.018148695150886112E0	9.223131585639669E0	9.223131585639669E0	27.578975565672092E0	2.990196476065928E0	0.021257838955041186E0	0.37772143989411266E0	4.377127527932845E0	4.377127527932845E0	13.08847130931596E0	2.990196476065928E0
chr8:128506792-128508706	.	.	Intergenic	0.02645266120351068E0	0.9999999999998793E0	3.1470605283087356E0	3.1470605283087356E0	15.543162771992971E0	4.938946242748638E0	0.006473197031791468E0	0.17266103846708905E0	11.551201396690532E0	11.551201396690532E0	15.543162771992971E0	1.3455884144177552E0	0.18116912703236357E0	0.8620384897188644E0	3.670473221847523E0	3.670473221847523E0	4.938946242748638E0	1.3455884144177552E0
chr1:59739042-59739533	.	.	Intergenic	0.026496391940266675E0	0.9999999999998793E0	3.718652733582786E0	3.718652733582786E0	13.468565694890247E0	3.6218939115387028E0	0.0394617754371673E0	0.49879210177315764E0	45.04241041502664E0	45.04241041502664E0	13.468565694890247E0	0.2990196477228711E0	0.1899013418330035E0	0.8620384897188644E0	12.11256162971419E0	12.11256162971419E0	3.6218939115387028E0	0.2990196477228711E0
chr17:31820176-31821507	.	.	Intergenic	0.026497150657115203E0	0.9999999999998793E0	0.45936393076759713E0	-2.176923204068286E0	11.87324934025691E0	25.84715199649374E0	7.455460804715229E-6	0.0011505621221560027E0	0.23565136396094485E0	-4.243557020810339E0	11.87324934025691E0	50.384810597678936E0	0.005801134953882623E0	0.16968162442521156E0	0.512994922276922E0	-1.949337033515871E0	25.84715199649374E0	50.384810597678936E0
chr5:113824152-113826791	Selplg	ENSMUST00000199109.1	5' UTR Exon	0.02664670709056288E0	0.9999999999998793E0	1.620699666742414E0	1.620699666742414E0	55.23138483729409E0	34.078729064163056E0	4.729385633310124E-8	1.753171877739048E-5	0.4169485629173289E0	-2.398377375384494E0	55.23138483729409E0	132.46570380492037E0	1.57825250966875E-12	3.546892353656189E-9	0.25726454535243426E0	-3.887049413008196E0	34.078729064163056E0	132.46570380492037E0
chr5:120906997-120907906	Oas1a	ENSMUST00000080322.7	TSS	0.02688051433354723E0	0.9999999999998793E0	0.3702676859823089E0	-2.70074877678572E0	6.800133713696245E0	18.36545280924447E0	0.19804462820625543E0	0.8565483502551655E0	2.526825306187021E0	2.526825306187021E0	6.800133713696245E0	2.6911768285072486E0	0.0032583557558255355E0	0.11588810103797165E0	6.824320354835801E0	6.824320354835801E0	18.36545280924447E0	2.6911768285072486E0
chr13:43267945-43269879	Gfod1	ENSMUST00000222779.1	Intron 1	0.026900485932713963E0	0.9999999999998793E0	1.5935228013260059E0	1.5935228013260059E0	58.5027376426009E0	36.71283372532822E0	5.841430298435094E-4	0.03251458258942667E0	2.248833031166429E0	2.248833031166429E0	58.5027376426009E0	26.014709332269366E0	0.17891720236183004E0	0.8620384897188644E0	1.4112336700140875E0	1.4112336700140875E0	36.71283372532822E0	26.014709332269366E0
chr4:141623329-141627484	Slc25a34	ENSMUST00000038661.7	TSS	0.02701131356109E0	0.9999999999998793E0	1.3121999560207456E0	1.3121999560207456E0	153.16491642317033E0	116.72376280795181E0	1.7173029143608527E-15	9.262530864042413E-12	22.270590733923637E0	22.270590733923637E0	153.16491642317033E0	6.87745189398421E0	5.384075880445451E-13	1.4519910436282304E-9	16.971949001933623E0	16.971949001933623E0	116.72376280795181E0	6.87745189398421E0
chr8:15010488-15012515	Kbtbd11	ENSMUST00000184598.1	TSS	0.02702690078593868E0	0.9999999999998793E0	1.5542007092962977E0	1.5542007092962977E0	64.22348504949159E0	41.32251688301592E0	0.010307892385627314E0	0.23155836637125682E0	0.6618802806613785E0	-1.510847247180046E0	64.22348504949159E0	97.0318755913332E0	4.3240354676851815E-6	7.919298438125698E-4	0.4258653832175003E0	-2.348159863205586E0	41.32251688301592E0	97.0318755913332E0
chr7:145340918-145341252	.	.	Intergenic	0.02706369382015023E0	0.9999999999998793E0	0.5817293705501898E0	-1.719012397559052E0	26.337025805753708E0	45.273673874923304E0	0.17950286356326942E0	0.8565483502551655E0	0.7103057313845345E0	-1.407844475717225E0	26.337025805753708E0	37.078436287452355E0	0.36728376763782367E0	0.8620384897188644E0	1.2210243583072646E0	1.2210243583072646E0	45.273673874923304E0	37.078436287452355E0
chr6:129208316-129210605	2310001H17Rik	ENSMUST00000181238.1	TTS	0.02713286897273118E0	0.9999999999998793E0	1.5986780082749534E0	1.5986780082749534E0	57.63922860011534E0	36.0543075602264E0	0.18098577176435704E0	0.8565483502551655E0	1.3068520229067633E0	1.3068520229067633E0	57.63922860011534E0	44.10539800207171E0	0.36933526876865275E0	0.8620384897188644E0	0.8174579347075127E0	-1.223304536590988E0	36.0543075602264E0	44.10539800207171E0
chr13:36814693-36815549	.	.	Intergenic	0.0273282918457844E0	0.9999999999998793E0	3.6954119838986488E0	3.6954119838986488E0	13.384390165109703E0	3.6218939115387108E0	0.011081004826044726E0	0.24179473390177708E0	9.946867869623581E0	9.946867869623581E0	13.384390165109703E0	1.3455884144177546E0	0.326711878528141E0	0.8620384897188644E0	2.691680362829171E0	2.691680362829171E0	3.6218939115387108E0	1.3455884144177546E0
chr3:30792526-30794163	Sec62	ENSMUST00000191730.1	TSS	0.027467438317862778E0	0.9999999999998793E0	0.7555228360637664E0	-1.323586729965631E0	108.58626210759166E0	143.72333558217815E0	0.033676642559545014E0	0.4603726350051704E0	0.7629010379767229E0	-1.31078600004541E0	108.58626210759166E0	142.33335216789254E0	0.9345013684305926E0	0.9998571342969699E0	1.0097656901429963E0	1.0097656901429963E0	143.72333558217815E0	142.33335216789254E0
chr3:37641666-37643839	Gm43820	ENSMUST00000199414.1	TSS	0.027479376508121166E0	0.9999999999998793E0	1.7247027578602885E0	1.7247027578602885E0	44.578654331186854E0	25.847151996493764E0	6.828184137150838E-6	0.0010816104367501799E0	15.692915054637668E0	15.692915054637668E0	44.578654331186854E0	2.8406866522872494E0	4.116273257190575E-4	0.027155307608204726E0	9.098909932808777E0	9.098909932808777E0	25.847151996493764E0	2.8406866522872494E0
chr5:77407855-77408409	Igfbp7	ENSMUST00000046746.9	TSS	0.027547292240366394E0	0.9999999999998793E0	3.901043779741213E0	3.901043779741213E0	12.84469701338004E0	3.292630828724545E0	0.04209126950384724E0	0.5157913796647198E0	42.95603018462652E0	42.95603018462652E0	12.84469701338004E0	0.2990196477228711E0	0.209115907526322E0	0.8620384897188644E0	11.011419663553774E0	11.011419663553774E0	3.292630828724545E0	0.2990196477228711E0
chr2:34249452-34250227	Pbx3	ENSMUST00000143776.7	Intron 2	0.027712148835903342E0	0.9999999999998793E0	2.7570402064859247E0	2.7570402064859247E0	17.70193537882545E0	6.420630115288753E0	0.003559244894707007E0	0.11692486908105824E0	10.763619483449974E0	10.763619483449974E0	17.70193537882545E0	1.6446080620040273E0	0.11912940372598185E0	0.8450418043994546E0	3.9040487904850307E0	3.9040487904850307E0	6.420630115288753E0	1.6446080620040273E0
chr1:176996497-176997440	Sdccag8	ENSMUST00000139589.1	TSS	0.02774259669639618E0	0.9999999999998793E0	2.2331302490663862E0	2.2331302490663862E0	24.264482553797674E0	10.865681732600246E0	6.451332254425147E-4	0.03481363503159599E0	10.819571109271735E0	10.819571109271735E0	24.264482553797674E0	2.2426473571585888E0	0.03144385980323598E0	0.4690187345899443E0	4.84502465263507E0	4.84502465263507E0	10.865681732600246E0	2.2426473571585888E0
chr2:72867566-72868547	.	.	Intergenic	0.027785815290234904E0	0.9999999999998793E0	4.676881618145711E0	4.676881618145711E0	11.549433449212902E0	2.469473121663494E0	0.01866400280191328E0	0.32876545416407316E0	7.724865934582797E0	7.724865934582797E0	11.549433449212902E0	1.4950982382112579E0	0.6282004971015731E0	0.896125467039406E0	1.6517129500587082E0	1.6517129500587082E0	2.469473121663494E0	1.4950982382112579E0
chr12:55393643-55394989	Psma6	ENSMUST00000163070.7	Intron 1	0.027984735606722322E0	0.9999999999998793E0	3.7777214673969173E0	3.7777214673969173E0	13.060574274072334E0	3.457262370132299E0	0.013926505639857815E0	0.2782541105553588E0	6.2397114694267755E0	6.2397114694267755E0	13.060574274072334E0	2.0931375333725444E0	0.5666547373069312E0	0.8798268675078365E0	1.6517129500620173E0	1.6517129500620173E0	3.457262370132299E0	2.0931375333725444E0
chr11:103773308-103774629	Wnt3	ENSMUST00000000127.5	TSS	0.02806553612772467E0	0.9999999999998793E0	1.8512120756416093E0	1.8512120756416093E0	36.26737979612752E0	19.59115342501083E0	8.438651821603942E-5	0.007636767516374849E0	4.851504587344749E0	4.851504587344749E0	36.26737979612752E0	7.475491189007992E0	0.025021840044786817E0	0.41245520735647884E0	2.620717880561184E0	2.620717880561184E0	19.59115342501083E0	7.475491189007992E0
chr5:105138577-105141624	Gbp4	ENSMUST00000196677.4	TSS	0.028091590652338846E0	0.9999999999998793E0	1.4845807032300427E0	1.4845807032300427E0	76.74436616604739E0	51.694303987026494E0	0.9837083749909399E0	0.9998888456104917E0	0.996711674330797E0	-1.0032991744291657E0	76.74436616604739E0	76.99755921648494E0	0.02670680117330081E0	0.4283929759059447E0	0.6713758788338177E0	-1.489478593924172E0	51.694303987026494E0	76.99755921648494E0
chr15:38600671-38602744	.	.	Intergenic	0.028120908696506755E0	0.9999999999998793E0	1.7054622496689062E0	1.7054622496689062E0	45.765979264744104E0	26.83494124459746E0	0.009043700049890323E0	0.21398623178773463E0	1.9373850449753716E0	1.9373850449753716E0	45.765979264744104E0	23.622552152675407E0	0.651320395729509E0	0.9066373907383563E0	1.1359882315492413E0	1.1359882315492413E0	26.83494124459746E0	23.622552152675407E0
chr5:103403156-103406349	.	.	Intergenic	0.02816263614792732E0	0.9999999999998793E0	1.455104553580164E0	1.455104553580164E0	84.08419302729567E0	57.78567101615722E0	1.0465441208347362E-9	7.145180629544652E-7	17.482848172425797E0	17.482848172425797E0	84.08419302729567E0	4.809524866772823E0	1.6211065977786587E-7	5.4648010006930386E-5	12.014839847357154E0	12.014839847357154E0	57.78567101615722E0	4.809524866772823E0
chr2:163227733-163229951	Tox2	ENSMUST00000099110.9	Intron 1	0.02824984911657949E0	0.9999999999998793E0	0.5564655347552231E0	-1.7970564887542908E0	21.803603331688365E0	39.18230684543525E0	0.005987336376144841E0	0.16476324921017155E0	3.472236134846219E0	3.472236134846219E0	21.803603331688365E0	6.279412598951604E0	2.0507905231807633E-5	0.0026717986244816244E0	6.239804476612516E0	6.239804476612516E0	39.18230684543525E0	6.279412598951604E0
chr1:131022773-131023769	Il10	ENSMUST00000016673.5	Intron 4	0.028321779191246583E0	0.9999999999998793E0	3.878097063647819E0	3.878097063647819E0	12.769141948552942E0	3.292630828724545E0	0.027498748106129414E0	0.4105137634171739E0	28.46890284449806E0	28.46890284449806E0	12.769141948552942E0	0.4485294715535806E0	0.21039554886910872E0	0.8620384897188644E0	7.340946442872066E0	7.340946442872066E0	3.292630828724545E0	0.4485294715535806E0
chr11:97110195-97111436	Tbx21	ENSMUST00000001484.2	Intron 1	0.02833645596900769E0	0.9999999999998793E0	6.2941210558740766E0	6.2941210558740766E0	10.362108515371496E0	1.6463154145567178E0	0.025902617804600778E0	0.39729746771444696E0	7.700800931654315E0	7.700800931654315E0	10.362108515371496E0	1.3455884144177546E0	0.8622073839796958E0	0.9677799761370617E0	1.2234910741774556E0	1.2234910741774556E0	1.6463154145567178E0	1.3455884144177546E0
chr10:95908258-95909636	.	.	Intergenic	0.028435170968124705E0	0.9999999999998793E0	3.665610274356088E0	3.665610274356088E0	13.27645153476406E0	3.621893911538711E0	0.0116954907916185E0	0.24928426756851657E0	11.099982592127452E0	11.099982592127452E0	13.27645153476406E0	1.196078590625921E0	0.29344640581803744E0	0.8620384897188644E0	3.028140408100888E0	3.028140408100888E0	3.621893911538711E0	1.196078590625921E0
chr6:87446639-87448432	.	.	Intergenic	0.028439436730004868E0	0.9999999999998793E0	3.2781880502989993E0	3.2781880502989993E0	14.571715098902208E0	4.445051618552859E0	0.008114500968414848E0	0.19898512456599565E0	8.121938482566879E0	8.121938482566879E0	14.571715098902208E0	1.7941178857952795E0	0.3050124530978099E0	0.8620384897188644E0	2.4775694249224314E0	2.4775694249224314E0	4.445051618552859E0	1.7941178857952795E0
chr14:7657859-7659066	.	.	Intergenic	0.028499931154175644E0	0.9999999999998793E0	0.2655747282381997E0	-3.7654185194273393E0	3.4540361724313047E0	13.005891770444759E0	0.2105452549959495E0	0.8565483502551655E0	5.775600699049874E0	5.775600699049874E0	3.4540361724313047E0	0.5980392953757203E0	0.019885599891654417E0	0.36339476827247785E0	21.74755383301989E0	21.74755383301989E0	13.005891770444759E0	0.5980392953757203E0
chr12:106474214-106475732	.	.	Intergenic	0.028502459709186797E0	0.9999999999998793E0	4.280927924315097E0	4.280927924315097E0	11.981187970604545E0	2.7987362044927226E0	0.04512840154039694E0	0.5328348410935734E0	3.339019154447189E0	3.339019154447189E0	11.981187970604545E0	3.5882357711686024E0	0.7553505461165977E0	0.9402484359708735E0	0.7799755598504725E0	-1.282091454495969E0	2.7987362044927226E0	3.5882357711686024E0
chr15:66557783-66559104	Tmem71	ENSMUST00000048372.6	CDS Exon 3	0.028589422794929785E0	0.9999999999998793E0	4.1264711190224475E0	4.1264711190224475E0	12.22825141851899E0	2.9633677459048444E0	0.5834112238033409E0	0.8710994082153971E0	0.8097915787484331E0	-1.234885649892213E0	12.22825141851899E0	15.1004922000032E0	0.010379391831567015E0	0.24543098093963836E0	0.19624312285027481E0	-5.095719969575482E0	2.9633677459048444E0	15.1004922000032E0
chr15:86220894-86221683	Tbc1d22a	ENSMUST00000063414.8	Intron 1	0.02861231208882718E0	0.9999999999998793E0	2.5788412663397144E0	2.5788412663397144E0	19.105137573242317E0	7.408419363615678E0	0.0024515128556179366E0	0.09047281774686064E0	10.648763787767248E0	10.648763787767248E0	19.105137573242317E0	1.7941178857952802E0	0.08833066530573436E0	0.7631382661386547E0	4.1292823745145055E0	4.1292823745145055E0	7.408419363615678E0	1.7941178857952802E0
chr15:81352985-81354653	Slc25a17	ENSMUST00000023040.7	Intron 1	0.02861781219907239E0	0.9999999999998793E0	3.1033513543117768E0	3.1033513543117768E0	15.327285511307029E0	4.938946242748632E0	0.008980178804021697E0	0.21310776928254535E0	17.086152063092385E0	17.086152063092385E0	15.327285511307029E0	0.8970589430966927E0	0.1372115655351344E0	0.8620384897188644E0	5.5057098318413065E0	5.5057098318413065E0	4.938946242748632E0	0.8970589430966927E0
chr6:49656814-49657438	.	.	Intergenic	0.0286523402977871E0	0.9999999999998793E0	0.3114293655375996E0	-3.211000986608206E0	4.614398683554464E0	14.816838725496993E0	0.15578786662416202E0	0.8565483502551655E0	5.143919158339053E0	5.143919158339053E0	4.614398683554464E0	0.8970589430966934E0	0.009903692734653245E0	0.23830940137525083E0	16.517129492459556E0	16.517129492459556E0	14.816838725496993E0	0.8970589430966934E0
chr9:14057905-14059716	.	.	Intergenic	0.02866072431580316E0	0.9999999999998793E0	3.868261899244682E0	3.868261899244682E0	12.736758383033655E0	3.2926308287245596E0	0.031194617656434647E0	0.4413049910091136E0	3.7039178398859436E0	3.7039178398859436E0	12.736758383033655E0	3.438725947394628E0	0.9550986020454583E0	0.9998571342969699E0	0.9575147537474575E0	-1.0443703306776908E0	3.2926308287245596E0	3.438725947394628E0
chr5:92372105-92373677	Art3	ENSMUST00000125462.7	5' UTR Exon	0.02867232244692277E0	0.9999999999998793E0	3.4093155722883757E0	3.4093155722883757E0	14.032021947180452E0	4.115788535750588E0	0.01647873750542629E0	0.30770923056236643E0	4.46921482683925E0	4.46921482683925E0	14.032021947180452E0	3.1397062998433394E0	0.7179009998398196E0	0.9277553163499707E0	1.3108832937513781E0	1.3108832937513781E0	4.115788535750588E0	3.1397062998433394E0
chr11:11713479-11720092	Ikzf1	ENSMUST00000048122.12	Intron 3	0.028680509825668127E0	0.9999999999998793E0	1.3573273999560407E0	1.3573273999560407E0	120.8912659625194E0	89.0656638674167E0	0.0026404795487679172E0	0.09524968953751572E0	0.7000728122555545E0	-1.4284228475865453E0	120.8912659625194E0	172.68384637452436E0	3.87754270882774E-7	1.092120534280352E-4	0.5157729905682501E0	-1.9388374697524495E0	89.0656638674167E0	172.68384637452436E0
chr6:108278407-108279661	Itpr1	ENSMUST00000032192.8	Intron 4	0.028682981223739756E0	0.9999999999998793E0	0.18156118441302135E0	-5.507785175740906E0	1.9428953471819603E0	10.701050191224784E0	0.6098907950201502E0	0.8880918855573511E0	1.8564430821321705E0	1.8564430821321705E0	1.9428953471819603E0	1.0465687668433643E0	0.0232134550938645E0	0.3951562318668842E0	10.224889687374327E0	10.224889687374327E0	10.701050191224784E0	1.0465687668433643E0
chr1:192536077-192536832	Hhat	ENSMUST00000128619.7	Intron 11	0.028691180786421338E0	0.9999999999998793E0	4.2744460621195755E0	4.2744460621195755E0	11.963046948205198E0	2.7987362044926742E0	0.9995319201832891E0	0.9998888456104917E0	1000000.0E0	1000000.0E0	11.963046948205198E0	2.0611536302015335E-10	0.9995593551013194E0	0.9998571342969699E0	1000000.0E0	1000000.0E0	2.7987362044926742E0	2.0611536302015335E-10
chr10:8130275-8131132	.	.	Intergenic	0.02873191232710949E0	0.9999999999998793E0	2.6537712789081738E0	2.6537712789081738E0	18.34956716086624E0	6.914524739455203E0	0.003197361849666417E0	0.10877013930193191E0	12.27315148389161E0	12.27315148389161E0	18.34956716086624E0	1.4950982382112585E0	0.08951953141986646E0	0.7671995243390228E0	4.624796259360032E0	4.624796259360032E0	6.914524739455203E0	1.4950982382112585E0
chr11:109471813-109474632	Arsg	ENSMUST00000152252.7	TSS	0.028740433156042244E0	0.9999999999998793E0	0.7003405671445653E0	-1.427876731569626E0	64.10576975124347E0	91.53513698716053E0	0.1381028634221994E0	0.8342238876661954E0	0.7810072141608884E0	-1.2803979039737767E0	64.10576975124347E0	82.08089322211768E0	0.4732761044462973E0	0.8659354711340131E0	1.1151820282883482E0	1.1151820282883482E0	91.53513698716053E0	82.08089322211768E0
chr8:15017323-15019441	5830468F06Rik	ENSMUST00000184288.1	TSS	0.028784934267706078E0	0.9999999999998793E0	1.6196196408711039E0	1.6196196408711039E0	53.861376538945514E0	33.25557135746789E0	0.033737202043036735E0	0.46055849101347784E0	0.6867811422072877E0	-1.4560679356833228E0	53.861376538945514E0	78.42582335012456E0	3.386813623139237E-5	0.004001596341389912E0	0.424038536503488E0	-2.358276227075353E0	33.25557135746789E0	78.42582335012456E0
chr13:30757434-30759223	Irf4	ENSMUST00000110307.2	CDS Exon 7	0.028895360674551705E0	0.9999999999998793E0	3.5632478807096053E0	3.5632478807096053E0	13.492328795455197E0	3.786525452943863E0	0.021716022775103743E0	0.361062349694631E0	4.101989133084943E0	4.101989133084943E0	13.492328795455197E0	3.289216123619556E0	0.851816108201291E0	0.9677799761370617E0	1.1511938743560128E0	1.1511938743560128E0	3.786525452943863E0	3.289216123619556E0
chr13:113600964-113601804	Snx18	ENSMUST00000224883.1	Intron 3	0.02896761891960606E0	0.9999999999998793E0	0.4071298063902235E0	-2.4562190837030626E0	8.311274538680408E0	20.414311131802187E0	0.6198360820817177E0	0.8880918855573511E0	0.7941450963854497E0	-1.2592157334364948E0	8.311274538680408E0	10.465687664016516E0	0.0788488264008362E0	0.7284067429592878E0	1.9505943409711497E0	1.9505943409711497E0	20.414311131802187E0	10.465687664016516E0
chr12:73695580-73701047	Prkch	ENSMUST00000119092.1	CDS Exon 5	0.028980023002319052E0	0.9999999999998793E0	0.7456107511439913E0	-1.3411823776222365E0	96.60507414335876E0	129.5650230299623E0	0.06310093077021643E0	0.6252307068040376E0	1.3350110090203093E0	1.3350110090203093E0	96.60507414335876E0	72.36275468188977E0	7.219262782011752E-5	0.007251057114375734E0	1.7904932392297195E0	1.7904932392297195E0	129.5650230299623E0	72.36275468188977E0
chr9:21134167-21137156	Cdc37	ENSMUST00000019615.10	TTS	0.029034056861413898E0	0.9999999999998793E0	1.4272457641525642E0	1.4272457641525642E0	91.4032016467939E0	64.04166958664268E0	0.005525794055958164E0	0.15645895880207422E0	1.5962205766085942E0	1.5962205766085942E0	91.4032016467939E0	57.2622624881791E0	0.5384130885309911E0	0.875173998899523E0	1.1183922325783604E0	1.1183922325783604E0	64.04166958664268E0	57.2622624881791E0
chr1:131009138-131010468	.	.	Intergenic	0.029129652525647743E0	0.9999999999998793E0	3.328621712602709E0	3.328621712602709E0	14.247899207869583E0	4.280420077152263E0	0.00925437838031547E0	0.2169740402129477E0	11.91217644018985E0	11.91217644018985E0	14.247899207869583E0	1.1960785906259217E0	0.21766292134880733E0	0.8620384897188644E0	3.578711391290993E0	3.578711391290993E0	4.280420077152263E0	1.1960785906259217E0
chr5:92490580-92492267	Scarb2	ENSMUST00000031377.8	Intron 1	0.029144422950151884E0	0.9999999999998793E0	0.48493906085161864E0	-2.0621147701401172E0	13.492328795455162E0	27.82273049269491E0	0.04210572875694175E0	0.515909958904768E0	0.5069874211220877E0	-1.9724355247054342E0	13.492328795455162E0	26.612748627161842E0	0.8697438962702706E0	0.9725732972628143E0	1.0454662493711047E0	1.0454662493711047E0	27.82273049269491E0	26.612748627161842E0
chr17:80146012-80148225	Galm	ENSMUST00000133955.1	Intron 1	0.02914958748704572E0	0.9999999999998793E0	2.7045051415845354E0	2.7045051415845354E0	17.80987400916584E0	6.585261656678257E0	0.003452013322470459E0	0.11440216071731361E0	7.941450960765748E0	7.941450960765748E0	17.80987400916584E0	2.2426473571585888E0	0.1635509883614921E0	0.8620384897188644E0	2.9363785776029077E0	2.9363785776029077E0	6.585261656678257E0	2.2426473571585888E0
chr14:74633692-74635402	.	.	Intergenic	0.02935893961228015E0	0.9999999999998793E0	3.9683329028654644E0	3.9683329028654644E0	12.41294249199356E0	3.127999287315434E0	0.014489442685689493E0	0.2845993537569896E0	8.30242600435705E0	8.30242600435705E0	12.41294249199356E0	1.4950982382112579E0	0.4578063374032577E0	0.8644800785043375E0	2.0921697366574294E0	2.0921697366574294E0	3.127999287315434E0	1.4950982382112579E0
chr7:101577199-101578203	Art2b	ENSMUST00000209526.1	TTS	0.029373208395854222E0	0.9999999999998793E0	0.34119916454924365E0	-2.930839532743565E0	5.5048701493791095E0	16.133891056420268E0	0.39558796641348204E0	0.8565483502551655E0	1.840972723177588E0	1.840972723177588E0	5.5048701493791095E0	2.9901964760659228E0	0.0074254585693266815E0	0.19880839055815766E0	5.395595635791451E0	5.395595635791451E0	16.133891056420268E0	2.9901964760659228E0
chr6:99375829-99376138	Foxp1	ENSMUST00000177227.7	5' UTR Exon	0.029442695143421786E0	0.9999999999998793E0	5.093799893161692E0	5.093799893161692E0	10.901801667120292E0	2.140210038826949E0	0.8845779508699919E0	0.9840496462490187E0	0.9405900883458732E0	-1.0631623832636865E0	10.901801667120292E0	11.59038544228364E0	0.023176018995397934E0	0.3948613273650872E0	0.18465391418469218E0	-5.415536434282096E0	2.140210038826949E0	11.59038544228364E0
chr14:58967153-58968836	.	.	Intergenic	0.029578331256119948E0	0.9999999999998793E0	2.6154516206033978E0	2.6154516206033978E0	18.51519076723468E0	7.07915628084267E0	0.008983249132196653E0	0.21311854709422687E0	30.959823059122634E0	30.959823059122634E0	18.51519076723468E0	0.5980392953757204E0	0.06648640642872003E0	0.6759090316738322E0	11.837276138176106E0	11.837276138176106E0	7.07915628084267E0	0.5980392953757204E0
chr12:15971040-15972823	.	.	Intergenic	0.029621362908399184E0	0.9999999999998793E0	1.8633911024529812E0	1.8633911024529812E0	34.97211623219496E0	18.767995718213648E0	0.16464667398714633E0	0.8565483502551655E0	1.443900175100502E0	1.443900175100502E0	34.97211623219496E0	24.22059144757756E0	0.40689499929215683E0	0.8620384897188644E0	0.7748776803751728E0	-1.2905262666951893E0	18.767995718213648E0	24.22059144757756E0
chr4:101291930-101293706	Gm12796	ENSMUST00000131864.1	TTS	0.029673061681340773E0	0.9999999999998793E0	1.543752301168366E0	1.543752301168366E0	63.7917305282246E0	41.32251688301599E0	0.1932793390092194E0	0.8565483502551655E0	0.8035263687092554E0	-1.2445142299515946E0	63.7917305282246E0	79.38971639561305E0	6.643618132673282E-4	0.03830395611041502E0	0.5205021350258836E0	-1.9212217063245511E0	41.32251688301599E0	79.38971639561305E0
chr3:115799962-115802062	.	.	Intergenic	0.02974757711676398E0	0.9999999999998793E0	1.763550916687238E0	1.763550916687238E0	40.560453693120486E0	22.999309693485756E0	2.871552568357639E-4	0.019384417409664807E0	0.49807703543199355E0	-2.0077215548247014E0	40.560453693120486E0	81.43409715314716E0	8.608575122753956E-8	3.147907878701144E-5	0.2824284973680329E0	-3.5407191884638287E0	22.999309693485756E0	81.43409715314716E0
chr4:132777782-132779743	Rpa2	ENSMUST00000102561.10	TTS	0.029920570111632395E0	0.9999999999998793E0	2.7234177649490565E0	2.7234177649490565E0	17.486058118144285E0	6.420630115288748E0	0.0039078213350993785E0	0.1244016283088376E0	7.309744634443801E0	7.309744634443801E0	17.486058118144285E0	2.392157180942998E0	0.19243342820751763E0	0.8620384897188644E0	2.6840335436309877E0	2.6840335436309877E0	6.420630115288748E0	2.392157180942998E0
chr12:85622124-85623378	Jdp2	ENSMUST00000050687.13	Intron 2	0.029965978255732464E0	0.9999999999998793E0	0.23085831350478211E0	-4.331661203005737E0	2.6984657598245207E0	11.688839439471273E0	0.6166824508234181E0	0.8880918855573511E0	1.6407956534861636E0	1.6407956534861636E0	2.6984657598245207E0	1.6446080620040333E0	0.01853491235993316E0	0.3482090910837809E0	7.1073708742664605E0	7.1073708742664605E0	11.688839439471273E0	1.6446080620040333E0
chr5:77383035-77384587	Igfbp7	ENSMUST00000046746.9	Intron 1	0.03006869043254192E0	0.9999999999998793E0	3.5347418976687233E0	3.5347418976687233E0	13.384390165109696E0	3.786525452943859E0	0.011484810494798922E0	0.2468421921708398E0	7.460150902612949E0	7.460150902612949E0	13.384390165109696E0	1.7941178857952802E0	0.40987709761260444E0	0.8620384897188644E0	2.1105221027688503E0	2.1105221027688503E0	3.786525452943859E0	1.7941178857952802E0
chr2:45059596-45060695	Zeb2	ENSMUST00000076836.12	Intron 2	0.03048848269075562E0	0.9999999999998793E0	8.429626413574786E0	8.429626413574786E0	9.714476733266647E0	1.1524207902763972E0	0.03262527734378273E0	0.4521889429404953E0	12.995101565798988E0	12.995101565798988E0	9.714476733266647E0	0.7475491194954246E0	0.7707079999352094E0	0.942411318162877E0	1.541598752807374E0	1.541598752807374E0	1.1524207902763972E0	0.7475491194954246E0
chr1:40085489-40086034	Il1r2	ENSMUST00000194913.1	TSS	0.03049354428451462E0	0.9999999999998793E0	0.4298665208868267E0	-2.3263035184432876E0	9.390660842211524E0	21.845527357744277E0	0.1560274851683008E0	0.8565483502551655E0	2.3262836152523403E0	2.3262836152523403E0	9.390660842211524E0	4.036765242484368E0	0.0018286715366572324E0	0.07800090339020388E0	5.411641759058491E0	5.411641759058491E0	21.845527357744277E0	4.036765242484368E0
chr12:76361680-76363631	Zbtb25	ENSMUST00000176187.7	5' UTR Exon	0.030566224273849456E0	0.9999999999998793E0	1.6499012386934324E0	1.6499012386934324E0	49.43589269570698E0	29.96294053021961E0	0.05817329230705785E0	0.6046261715794351E0	0.7035173194429011E0	-1.4214291139155986E0	49.43589269570698E0	70.26961715008538E0	9.364800454282115E-5	0.00878442712525891E0	0.4263996552908955E0	-2.345217655764254E0	29.96294053021961E0	70.26961715008538E0
chr1:60973554-60974625	.	.	Intergenic	0.030667900370050197E0	0.9999999999998793E0	1.8391190589065805E0	1.8391190589065805E0	35.727686644489914E0	19.426521883651873E0	3.7833867075979005E-5	0.004181591266646663E0	11.948273944692533E0	11.948273944692533E0	35.727686644489914E0	2.990196476065924E0	0.0025930176388148105E0	0.09946250042722839E0	6.496737602075743E0	6.496737602075743E0	19.426521883651873E0	2.990196476065924E0
chr5:92374649-92376417	Art3	ENSMUST00000120781.7	TSS	0.030749125832303003E0	0.9999999999998793E0	1.6575108121398223E0	1.6575108121398223E0	48.57238365313174E0	29.304414364830293E0	0.431568788764722E0	0.8565483502551655E0	1.181372870576805E0	1.181372870576805E0	48.57238365313174E0	41.115201527707576E0	0.16129366688297708E0	0.8620384897188644E0	0.7127391640068217E0	-1.4030378159357453E0	29.304414364830293E0	41.115201527707576E0
chr13:41671660-41672477	.	.	Intergenic	0.030802329450241122E0	0.9999999999998793E0	4.560810137855738E0	4.560810137855738E0	11.262798048444596E0	2.4694731216633787E0	0.050177525667510534E0	0.5617851817676558E0	37.66574582711992E0	37.66574582711992E0	11.262798048444596E0	0.299019647722871E0	0.275556906531466E0	0.8620384897188644E0	8.258564748066545E0	8.258564748066545E0	2.4694731216633787E0	0.299019647722871E0
chr14:56295976-56298305	.	.	Intergenic	0.03081186374224381E0	0.9999999999998793E0	1.7265123733444205E0	1.7265123733444205E0	42.63575898535436E0	24.69473120703143E0	0.20629645860755152E0	0.8565483502551655E0	0.7728191994917352E0	-1.2939637118975256E0	42.63575898535436E0	55.16912495625741E0	9.006860223532653E-4	0.047487636016282406E0	0.4476186857524282E0	-2.234044359249753E0	24.69473120703143E0	55.16912495625741E0
chr8:116635824-116636742	Cdyl2	ENSMUST00000109102.3	Intron 1	0.030844472432725853E0	0.9999999999998793E0	0.4021978617758279E0	-2.48633842951002E0	7.879520017261529E0	19.591153425010795E0	0.19354618593659828E0	0.8565483502551655E0	0.5606633659530593E0	-1.7836014634202504E0	7.879520017261529E0	14.05392343383682E0	0.34198857540099065E0	0.8620384897188644E0	1.3939988727875312E0	1.3939988727875312E0	19.591153425010795E0	14.05392343383682E0
chr4:8926923-8927780	.	.	Intergenic	0.03088646222284665E0	0.9999999999998793E0	2.1374155801592254E0	2.1374155801592254E0	25.3357935534218E0	11.85347098084427E0	0.6098863521415528E0	0.8880918855573511E0	1.1606784638061642E0	1.1606784638061642E0	25.3357935534218E0	21.82843426795324E0	0.0905844783906437E0	0.771663822332812E0	0.5430289151909804E0	-1.8415225635789676E0	11.85347098084427E0	21.82843426795324E0
chr13:94400197-94401409	Ap3b1	ENSMUST00000022196.4	Intron 3	0.030910717637051784E0	0.9999999999998793E0	0.24962585387207592E0	-4.005995310535676E0	3.0222816509455774E0	12.107246120806003E0	0.8259868384341028E0	0.963651722109486E0	0.8422751022186331E0	-1.187260548680478E0	3.0222816509455774E0	3.5882357711685873E0	0.04304469553503348E0	0.5531158251115712E0	3.3741501096688014E0	3.3741501096688014E0	12.107246120806003E0	3.5882357711685873E0
chr4:63841696-63842744	Tnfsf8	ENSMUST00000030047.2	Intron 2	0.03096323457363371E0	0.9999999999998793E0	2.1790308806431518E0	2.1790308806431518E0	24.39413045974334E0	11.194944815349883E0	0.015258534904306094E0	0.29387322544763633E0	2.5101649195556845E0	2.5101649195556845E0	24.39413045974334E0	9.71813854527983E0	0.7469493306033846E0	0.9356381017834772E0	1.1519639037032816E0	1.1519639037032816E0	11.194944815349883E0	9.71813854527983E0
chr10:44448923-44450567	Prdm1	ENSMUST00000167340.1	CDS Exon 3	0.031032377770459616E0	0.9999999999998793E0	3.8026981382515115E0	3.8026981382515115E0	12.520881122340416E0	3.29263082872456E0	0.06210652911233236E0	0.6223064424500016E0	2.7915403382168553E0	2.7915403382168553E0	12.520881122340416E0	4.485294713791721E0	0.6701453063776744E0	0.9114020100718497E0	0.734094644572659E0	-1.362222170388034E0	3.29263082872456E0	4.485294713791721E0
chr4:106787874-106789027	Acot11	ENSMUST00000148688.1	5' UTR Exon	0.031069033621792228E0	0.9999999999998793E0	0.49352565777695556E0	-2.026237104884101E0	13.924083316835679E0	28.21349426807014E0	0.02613548541420239E0	0.3991292969119976E0	3.5819831261420254E0	3.5819831261420254E0	13.924083316835679E0	3.887255418713435E0	2.487475047044387E-4	0.018621193320598136E0	7.257947119257719E0	7.257947119257719E0	28.21349426807014E0	3.887255418713435E0
chr11:75563780-75564585	Slc43a2	ENSMUST00000108433.7	Intron 9	0.031152712893330547E0	0.9999999999998793E0	0.34147792203657407E0	-2.9284470106764173E0	5.396931519017183E0	15.804627973691206E0	0.3510924758447533E0	0.8565483502551655E0	2.005416909750509E0	2.005416909750509E0	5.396931519017183E0	2.6911768285072495E0	0.0072628748524931125E0	0.1956224966199724E0	5.872757154518816E0	5.872757154518816E0	15.804627973691206E0	2.6911768285072495E0
chr2:65827513-65829247	.	.	Intergenic	0.03126146390785083E0	0.9999999999998793E0	3.161109905664876E0	3.161109905664876E0	14.571715098902214E0	4.609683159952437E0	0.009259673759147822E0	0.21700386431035262E0	13.92332311124961E0	13.92332311124961E0	14.571715098902214E0	1.0465687668433639E0	0.1709142780884705E0	0.8620384897188644E0	4.404567865956915E0	4.404567865956915E0	4.609683159952437E0	1.0465687668433639E0
chr17:26604682-26606375	Ergic1	ENSMUST00000001619.14	CDS Exon 2	0.031317961047356895E0	0.9999999999998793E0	0.5183313044495612E0	-1.9292680017888248E0	16.298733184389743E0	31.444624402336807E0	0.030402351790126843E0	0.43501696440593624E0	0.5166562238815536E0	-1.935522991452931E0	16.298733184389743E0	31.546572809943193E0	0.9897513335558453E0	0.9998571342969699E0	0.9967683206597248E0	-1.0032421569519148E0	31.444624402336807E0	31.546572809943193E0
chr12:103337499-103338600	Asb2	ENSMUST00000149431.1	TSS	0.03131796104735801E0	0.9999999999998793E0	0.5183313044495635E0	-1.9292680017888162E0	16.29873318438977E0	31.444624402336725E0	0.0131128057066621E0	0.26837233296748647E0	3.893373685779533E0	3.893373685779533E0	16.29873318438977E0	4.186275066254379E0	1.0637145776343664E-4	0.009655637745947814E0	7.511361270981037E0	7.511361270981037E0	31.444624402336725E0	4.186275066254379E0
chr13:30170055-30171280	Mboat1	ENSMUST00000220870.1	Intron 1	0.031471141477097044E0	0.9999999999998793E0	8.335963897884135E0	8.335963897884135E0	9.606538102915154E0	1.1524207902763977E0	0.03649049453293708E0	0.4807862494421367E0	5.841232525158101E0	5.841232525158101E0	9.606538102915154E0	1.6446080620040273E0	0.7697140783959759E0	0.942411318162877E0	0.7007267061989969E0	-1.4270898927548703E0	1.1524207902763977E0	1.6446080620040273E0
chr6:98995618-98997721	Foxp1	ENSMUST00000177230.7	Intron 6	0.03151794840796484E0	0.9999999999998793E0	2.764309923574965E0	2.764309923574965E0	16.838426336098113E0	6.091367032507589E0	0.013918249090470165E0	0.27819219643066295E0	3.63303914968676E0	3.63303914968676E0	16.838426336098113E0	4.634804537559117E0	0.6575065523702386E0	0.9067821669732761E0	1.3142662183798495E0	1.3142662183798495E0	6.091367032507589E0	4.634804537559117E0
chr2:44424791-44425629	.	.	Intergenic	0.03156487535650461E0	0.9999999999998793E0	5.299737347553464E0	5.299737347553464E0	10.470047145721622E0	1.9755784974051493E0	0.05521494156109527E0	0.5903497013851261E0	35.014579227332845E0	35.014579227332845E0	10.470047145721622E0	0.299019647722871E0	0.3359447715904155E0	0.8620384897188644E0	6.606851798702204E0	6.606851798702204E0	1.9755784974051493E0	0.299019647722871E0
chr5:147048645-147049882	Lnx2	ENSMUST00000016664.7	5' UTR Exon	0.03159066996134342E0	0.9999999999998793E0	0.4338053361275773E0	-2.3051814182984396E0	9.498599472563443E0	21.895995004012608E0	0.1625256793087677E0	0.8565483502551655E0	2.268985989270456E0	2.268985989270456E0	9.498599472563443E0	4.186275066254382E0	0.0019251965089323178E0	0.08077663283082688E0	5.230424340845758E0	5.230424340845758E0	21.895995004012608E0	4.186275066254382E0
chr11:97112363-97114174	Tbx21	ENSMUST00000001484.2	Intron 1	0.031596724651831574E0	0.9999999999998793E0	1.8335628079742667E0	1.8335628079742667E0	35.619748014162234E0	19.426521883651855E0	5.73776319077695E-4	0.032119861374088315E0	39.70725478885598E0	39.70725478885598E0	35.619748014162234E0	0.8970589430966927E0	0.004404507255818478E0	0.14175919179332855E0	21.655792000234147E0	21.655792000234147E0	19.426521883651855E0	0.8970589430966927E0
chr8:34215205-34217006	Gm29243	ENSMUST00000188318.1	TSS	0.03166935106009313E0	0.9999999999998793E0	1.619738239956471E0	1.619738239956471E0	51.99870059822066E0	32.10315056809307E0	0.0047222875316081945E0	0.14068139268079835E0	0.6083999878751373E0	-1.6436555225659066E0	51.99870059822066E0	85.4679514045165E0	2.2445679059092403E-6	4.71146192801793E-4	0.3756162402460088E0	-2.6622917032156352E0	32.10315056809307E0	85.4679514045165E0
chr17:73153339-73155057	Lclat1	ENSMUST00000067545.7	5' UTR Exon	0.031686238310511296E0	0.9999999999998793E0	2.562947021249386E0	2.562947021249386E0	18.56544442154565E0	7.243787822229491E0	0.0032137917494125664E0	0.10908790351931459E0	6.535548159314664E0	6.535548159314664E0	18.56544442154565E0	2.8406866522872467E0	0.1811673616335106E0	0.8620384897188644E0	2.5500129753476966E0	2.5500129753476966E0	7.243787822229491E0	2.8406866522872467E0
chr10:117951538-117952794	.	.	Intergenic	0.03169737484866763E0	0.9999999999998793E0	1.8164386247730102E0	1.8164386247730102E0	36.483257056782215E0	20.085048049086335E0	0.23071937381367183E0	0.8565483502551655E0	0.768092428248219E0	-1.3019266473967077E0	36.483257056782215E0	47.49852454604875E0	0.001221749336904879E0	0.05885938840516517E0	0.4228562516634456E0	-2.3648698489526114E0	20.085048049086335E0	47.49852454604875E0
chr6:115575637-115579558	Tsen2	ENSMUST00000143520.1	TTS	0.03178329134215298E0	0.9999999999998793E0	1.310305342201122E0	1.310305342201122E0	145.8250895626625E0	111.29092194472594E0	4.145234902198682E-12	7.212240719433523E-9	40.63977365544482E0	40.63977365544482E0	145.8250895626625E0	3.5882357711686024E0	1.5261049630780376E-10	1.582937698866511E-7	31.0154987135868E0	31.0154987135868E0	111.29092194472594E0	3.5882357711686024E0
chr10:28517296-28518936	Ptprk	ENSMUST00000218276.1	Intron 13	0.03178675186509144E0	0.9999999999998793E0	3.8993184176097975E0	3.8993184176097975E0	12.197065231299403E0	3.1279992873154367E0	0.15177157433886826E0	0.8565483502551655E0	0.5954770796013227E0	-1.6793257612358634E0	12.197065231299403E0	20.48284585439535E0	0.0019647154108896584E0	0.08192491129451106E0	0.15271311953188424E0	-6.548225869953595E0	3.1279992873154367E0	20.48284585439535E0
chr16:27391089-27392354	Ccdc50	ENSMUST00000149077.1	TTS	0.03179756827899381E0	0.9999999999998793E0	3.4147792190379147E0	3.4147792190379147E0	13.492328795455192E0	3.951156994347805E0	0.01291524513294791E0	0.2662855959913016E0	15.040626816426327E0	15.040626816426327E0	13.492328795455192E0	0.8970589430966939E0	0.20490380169798686E0	0.8620384897188644E0	4.404567865639026E0	4.404567865639026E0	3.951156994347805E0	0.8970589430966939E0
chr9:59659271-59660412	Pkm	ENSMUST00000216620.1	5' UTR Exon	0.03182763018690462E0	0.9999999999998793E0	1.7611287629731571E0	1.7611287629731571E0	39.72141596657709E0	22.554521169433944E0	1.223191052494074E-5	0.0017025714632992676E0	8.302426004375386E0	8.302426004375386E0	39.72141596657709E0	4.784314361325698E0	0.0020664438134394415E0	0.08495178867650642E0	4.714264044134478E0	4.714264044134478E0	22.554521169433944E0	4.784314361325698E0
chr10:96692219-96695333	.	.	Intergenic	0.03184293844339138E0	0.9999999999998793E0	1.44389707306543E0	1.44389707306543E0	83.43656124544448E0	57.785671016221784E0	0.06334793517154931E0	0.6261013126785112E0	0.7634301200225694E0	-1.309877582470072E0	83.43656124544448E0	109.2916811337989E0	8.931072593000972E-5	0.00852733262862579E0	0.5287289061413415E0	-1.891328407402558E0	57.785671016221784E0	109.2916811337989E0
chr3:100819006-100820286	.	.	Intergenic	0.031847225715830214E0	0.9999999999998793E0	0.20861196693426864E0	-4.793588856362632E0	2.266711238319483E0	10.865681732600217E0	1.5000692813826354E-4	0.011820085726120455E0	0.07359685362221911E0	-13.58753738486039E0	2.266711238319483E0	30.799023691349166E0	0.0031502195547041915E0	0.11357741778897235E0	0.3527930573868213E0	-2.834522899648635E0	10.865681732600217E0	30.799023691349166E0
chr19:53193146-53196726	Add3	ENSMUST00000025999.6	5' UTR Exon	0.03186739593147949E0	0.9999999999998793E0	1.410025576402914E0	1.410025576402914E0	94.01454701592515E0	66.67577424784282E0	0.3941108742683287E0	0.8565483502551655E0	1.1371040258256175E0	1.1371040258256175E0	94.01454701592515E0	82.67893251689436E0	0.1912323188882092E0	0.8620384897188644E0	0.8064421276147766E0	-1.2400145847510617E0	66.67577424784282E0	82.67893251689436E0
chr8:117297581-117299298	Cmip	ENSMUST00000211913.1	Intron 1	0.031869584230686726E0	0.9999999999998793E0	0.2988910290071153E0	-3.345700951018488E0	4.101667954643152E0	13.72295437661165E0	0.6617456322675741E0	0.9052495148319469E0	0.7513497706279932E0	-1.3309380518798586E0	4.101667954643152E0	5.459065957010802E0	0.06850860304902674E0	0.6849549270663685E0	2.5137916421375994E0	2.5137916421375994E0	13.72295437661165E0	5.459065957010802E0
chr19:29453361-29455692	Pdcd1lg2	ENSMUST00000112576.2	CDS Exon 5	0.031899020311832865E0	0.9999999999998793E0	1.363206912207272E0	1.363206912207272E0	113.33556184109938E0	83.13892837998394E0	1.3128458305146792E-6	2.770485571191715E-4	2.276419194798828E0	2.276419194798828E0	113.33556184109938E0	49.786771302952E0	0.004219165735339146E0	0.13787763264714925E0	1.6698999795364187E0	1.6698999795364187E0	83.13892837998394E0	49.786771302952E0
chr9:44977871-44983479	Cd3g	ENSMUST00000002101.11	TSS	0.03197071505361653E0	0.9999999999998793E0	1.354333300457591E0	1.354333300457591E0	117.72603677975826E0	86.92545383029565E0	0.7114186681959728E0	0.9220909800221583E0	1.0500303829384803E0	1.0500303829384803E0	117.72603677975826E0	112.11679080209592E0	0.07495337511677506E0	0.7114787583743023E0	0.7753116478666695E0	-1.2898039165948016E0	86.92545383029565E0	112.11679080209592E0
chr9:90250647-90251437	Tbc1d2b	ENSMUST00000144348.7	3' UTR Exon	0.03218182589910898E0	0.9999999999998793E0	0.2724727731263245E0	-3.6700914683184784E0	3.4540361724313255E0	12.67662868770362E0	0.9493966106674079E0	0.9998888456104917E0	1.050109218311382E0	1.050109218311382E0	3.4540361724313255E0	3.2892161236195556E0	0.029243688546900144E0	0.449672422572525E0	3.853996882927189E0	3.853996882927189E0	12.67662868770362E0	3.2892161236195556E0
chr14:121109069-121109453	Farp1	ENSMUST00000026635.7	Intron 2	0.03222635790076467E0	0.9999999999998793E0	3.887420485053003E0	3.887420485053003E0	12.159848506741225E0	3.127999287315437E0	0.016058721098472863E0	0.30322114844312326E0	11.618776416782893E0	11.618776416782893E0	12.159848506741225E0	1.0465687668433634E0	0.33226457421144806E0	0.8620384897188644E0	2.988813909237934E0	2.988813909237934E0	3.127999287315437E0	1.0465687668433634E0
chr8:111563078-111564307	Znrf1	ENSMUST00000173781.1	5' UTR Exon	0.032343882642414626E0	0.9999999999998793E0	0.41577019189022396E0	-2.405174828560174E0	8.419213169034604E0	20.249679590444362E0	0.0054605077058616615E0	0.15550193974509371E0	0.33124768731129506E0	-3.0188890015109293E0	8.419213169034604E0	25.41667003737454E0	0.4454853787400565E0	0.8644800785043375E0	0.7967085995398981E0	-1.2551640594534856E0	20.249679590444362E0	25.41667003737454E0
chr1:38722955-38724957	Gm38135	ENSMUST00000195068.1	TTS	0.03234486234671129E0	0.9999999999998793E0	2.7864598428306255E0	2.7864598428306255E0	16.514610445073448E0	5.92673549111588E0	0.008768582157824036E0	0.20955708755840127E0	4.602431807231847E0	4.602431807231847E0	16.514610445073448E0	3.5882357711685975E0	0.453126359555791E0	0.8644800785043375E0	1.651712950062279E0	1.651712950062279E0	5.92673549111588E0	3.5882357711685975E0
chr5:112286274-112288740	Tpst2	ENSMUST00000151947.1	TSS	0.03244981120913301E0	0.9999999999998793E0	1.5047601782007967E0	1.5047601782007967E0	68.62148354298644E0	45.60293695772531E0	0.022620995618129528E0	0.3688218375259843E0	0.6985942455509512E0	-1.4314460881528492E0	68.62148354298644E0	98.22795418085305E0	1.8525054652092306E-5	0.0024519671416995746E0	0.464256202198441E0	-2.1539830706937146E0	45.60293695772531E0	98.22795418085305E0
chr9:15537520-15541631	Smco4	ENSMUST00000045620.9	5' UTR Exon	0.03246892784872968E0	0.9999999999998793E0	0.6845627989199762E0	-1.4607863611310519E0	53.64549927822557E0	78.3646136816976E0	1.2391219394674785E-6	2.6312559247278607E-4	5.200133238185996E0	5.200133238185996E0	53.64549927822557E0	10.316177840269946E0	9.269891070948735E-10	6.619260432076426E-7	7.596283710406356E0	7.596283710406356E0	78.3646136816976E0	10.316177840269946E0
chr6:101377266-101378269	Pdzrn3	ENSMUST00000075994.10	TSS	0.03249272580437244E0	0.9999999999998793E0	8.242301382325591E0	8.242301382325591E0	9.49859947256344E0	1.1524207902579E0	0.11121227765477808E0	0.7812452479456808E0	63.531607653736756E0	63.531607653736756E0	9.49859947256344E0	0.14950982390266584E0	0.457512745952921E0	0.8644800785043375E0	7.7079937637285365E0	7.7079937637285365E0	1.1524207902579E0	0.14950982390266584E0
chr2:165955901-165957171	.	.	Intergenic	0.03250679448460078E0	0.9999999999998793E0	2.005031296047015E0	2.005031296047015E0	28.387859782071796E0	14.158312560028062E0	0.5373847018457689E0	0.863612532886662E0	1.1867054564500379E0	1.1867054564500379E0	28.387859782071796E0	23.92157180012677E0	0.11778358958334735E0	0.8445040413663385E0	0.59186380720823E0	-1.6895778856911574E0	14.158312560028062E0	23.92157180012677E0
chr15:78613779-78616010	Cyth4	ENSMUST00000043069.5	CDS Exon 9	0.0325509662277787E0	0.9999999999998793E0	0.6002316150155662E0	-1.6660235398864591E0	28.064043891075933E0	46.75535774693929E0	0.031062613464139664E0	0.440707206518798E0	0.5977930662134343E0	-1.6728196704157872E0	28.064043891075933E0	46.946084652403826E0	0.9842801136985198E0	0.9998571342969699E0	0.9959373202924864E0	-1.004079252403475E0	46.75535774693929E0	46.946084652403826E0
chr5:110594129-110599353	Galnt9	ENSMUST00000040001.13	CDS Exon 5	0.03258980013090029E0	0.9999999999998793E0	1.2472481099657229E0	1.2472481099657229E0	210.26445185086084E0	168.58269831865246E0	3.8132657374394363E-7	9.888183050355874E-5	1.7961159265593394E0	1.7961159265593394E0	210.26445185086084E0	117.06619196548515E0	0.002435807452774325E0	0.09535904648295054E0	1.440063057388558E0	1.440063057388558E0	168.58269831865246E0	117.06619196548515E0
chr11:88566331-88567978	Msi2	ENSMUST00000148013.7	Intron 1	0.0326242027542089E0	0.9999999999998793E0	1.7260663613648155E0	1.7260663613648155E0	41.772249942757234E0	24.200836582973302E0	3.1911907170312345E-4	0.021041767495006747E0	46.56578061476906E0	46.56578061476906E0	41.772249942757234E0	0.8970589430966934E0	0.002180478914466184E0	0.08809543143828114E0	26.97797816878206E0	26.97797816878206E0	24.200836582973302E0	0.8970589430966934E0
chr14:101455693-101458842	Tbc1d4	ENSMUST00000161304.1	CDS Exon 3	0.03266388318867489E0	0.9999999999998793E0	2.26194975484805E0	2.26194975484805E0	22.34329648337057E0	9.877892484341022E0	0.0010314630367488772E0	0.049364979407015105E0	9.962911204942763E0	9.962911204942763E0	22.34329648337057E0	2.2426473571585874E0	0.045028098893129496E0	0.5652642979051039E0	4.404567866102772E0	4.404567866102772E0	9.877892484341022E0	2.2426473571585874E0
chr1:43499701-43501149	Nck2	ENSMUST00000086421.8	5' UTR Exon	0.03270244791826496E0	0.9999999999998793E0	0.5378774569608055E0	-1.859159529849694E0	18.24162853052638E0	33.91409752250619E0	0.3387906656752982E0	0.8565483502551655E0	0.7439607610344835E0	-1.3441569130736033E0	18.24162853052638E0	24.51961109502771E0	0.2211063431684554E0	0.8620384897188644E0	1.3831417387114908E0	1.3831417387114908E0	33.91409752250619E0	24.51961109502771E0
chr2:33160989-33162350	Ralgps1	ENSMUST00000091039.4	Intron 11	0.032757594128525705E0	0.9999999999998793E0	2.746589988170416E0	2.746589988170416E0	16.730487705756673E0	6.091367032507587E0	0.005315083299958916E0	0.15264369734798766E0	13.9877829407526E0	13.9877829407526E0	16.730487705756673E0	1.196078590625921E0	0.10360470334889557E0	0.8080498247426106E0	5.092781594995281E0	5.092781594995281E0	6.091367032507587E0	1.196078590625921E0
chr7:121934226-121935622	Cog7	ENSMUST00000148634.1	Intron 13	0.03289735660588876E0	0.9999999999998793E0	0.46893286032921466E0	-2.1325014401804756E0	11.657372079561087E0	24.859362748383685E0	0.3966092937429268E0	0.8565483502551655E0	0.7219500876347594E0	-1.3851373067578439E0	11.657372079561087E0	16.14706096615733E0	0.17700986337923028E0	0.8620384897188644E0	1.539559601619545E0	1.539559601619545E0	24.859362748383685E0	16.14706096615733E0
chr13:59655710-59657427	Golm1	ENSMUST00000225333.1	Intron 3	0.03290017644513659E0	0.9999999999998793E0	1.8968932797657367E0	1.8968932797657367E0	32.16571184364603E0	16.957048763237985E0	0.025915333828394303E0	0.39737950335044475E0	0.6077432941282889E0	-1.6454315656980485E0	32.16571184364603E0	52.92647760068276E0	4.527071975696995E-5	0.005008706002403713E0	0.32038876441343295E0	-3.121208079287043E0	16.957048763237985E0	52.92647760068276E0
chr10:8517933-8519026	Ust	ENSMUST00000061601.8	TSS	0.03292322811988643E0	0.9999999999998793E0	1.9741976926824676E0	1.9741976926824676E0	29.2513688247244E0	14.816838725496993E0	0.5192889738765805E0	0.863612532886662E0	1.1929784983684446E0	1.1929784983684446E0	29.2513688247244E0	24.5196110950277E0	0.12582355125840747E0	0.8606825583321617E0	0.6042852257351538E0	-1.6548476736022009E0	14.816838725496993E0	24.5196110950277E0
chr14:63123852-63125215	Ctsb	ENSMUST00000225639.1	TTS	0.03295916472287849E0	0.9999999999998793E0	1.8912623368866353E0	1.8912623368866353E0	32.38158910430503E0	17.12168030460072E0	8.10395421073725E-5	0.0073771970681422725E0	10.829251309568845E0	10.829251309568845E0	32.38158910430503E0	2.9901964760659214E0	0.005367703606344051E0	0.16150172874460827E0	5.72593822568041E0	5.72593822568041E0	17.12168030460072E0	2.9901964760659214E0
chr10:93376577-93377335	.	.	Intergenic	0.03296043770811937E0	0.9999999999998793E0	0.4856574890897961E0	-2.0590643045043295E0	12.952635643726257E0	26.670309703247195E0	0.2176769789305889E0	0.8565483502551655E0	1.7680410306748364E0	1.7680410306748364E0	12.952635643726257E0	7.325981365252829E0	0.0019510178073146767E0	0.08160610466400005E0	3.6405101751616002E0	3.6405101751616002E0	26.670309703247195E0	7.325981365252829E0
chr11:115462159-115462908	Slc16a5	ENSMUST00000146500.1	TSS	0.03300928444274697E0	0.9999999999998793E0	0.2690218246072996E0	-3.7171705361070027E0	3.3460975420607935E0	12.438015194288443E0	5.087728780284768E-5	0.005191174782185994E0	0.09815988036938096E0	-10.18746147852815E0	3.3460975420607935E0	34.08823981314205E0	0.002339042249612333E0	0.09266232265605259E0	0.3648770151368511E0	-2.740649475070221E0	12.438015194288443E0	34.08823981314205E0
chr5:115710432-115713663	Bicdl1	ENSMUST00000141950.1	Intron 2	0.03308684003491727E0	0.9999999999998793E0	1.465257903937579E0	1.465257903937579E0	76.71039817423242E0	52.35283015234998E0	0.4026857709063169E0	0.8565483502551655E0	1.1504020550432947E0	1.1504020550432947E0	76.71039817423242E0	66.68138138135147E0	0.19016121111447257E0	0.8620384897188644E0	0.7851191602187069E0	-1.2736920083843513E0	52.35283015234998E0	66.68138138135147E0
chr12:73323853-73325134	Slc38a6	ENSMUST00000058139.13	3' UTR Exon	0.03309247774562822E0	0.9999999999998793E0	3.3874609852902053E0	3.3874609852902053E0	13.384390165109696E0	3.9511569943478033E0	0.01634488137453931E0	0.3065318825653132E0	4.973433935418428E0	4.973433935418428E0	13.384390165109696E0	2.69117682850725E0	0.6270462372340287E0	0.896125467039406E0	1.4681892889734203E0	1.4681892889734203E0	3.9511569943478033E0	2.69117682850725E0
chr2:34544812-34546235	Mapkap1	ENSMUST00000113126.2	Intron 6	0.033092477745628346E0	0.9999999999998793E0	3.3874609852902022E0	3.3874609852902022E0	13.384390165109696E0	3.951156994347807E0	0.011389162218484256E0	0.24547114805085957E0	11.190226353023757E0	11.190226353023757E0	13.384390165109696E0	1.196078590625921E0	0.25220784348156383E0	0.8620384897188644E0	3.303425899697881E0	3.303425899697881E0	3.951156994347807E0	1.196078590625921E0
chr6:115559417-115560837	Tsen2	ENSMUST00000123359.2	TTS	0.03311630855033559E0	0.9999999999998793E0	0.4984379493268149E0	-2.0062677838848137E0	14.03202194718044E0	28.151993575392776E0	0.04582855506645892E0	0.5366547677685761E0	2.8440457991148023E0	2.8440457991148023E0	14.03202194718044E0	4.933824185091481E0	3.5960208657579513E-4	0.024489492351761837E0	5.705917462656969E0	5.705917462656969E0	28.151993575392776E0	4.933824185091481E0
chr4:63905546-63907561	.	.	Intergenic	0.033164464822731506E0	0.9999999999998793E0	2.7088185469132853E0	2.7088185469132853E0	16.946364966439422E0	6.2559985738985375E0	0.0042917718749873246E0	0.13235171740151735E0	10.30419670069568E0	10.30419670069568E0	16.946364966439422E0	1.644608062004028E0	0.12735095427640797E0	0.8620384897188644E0	3.803944975361075E0	3.803944975361075E0	6.2559985738985375E0	1.644608062004028E0
chr6:134220025-134221335	Etv6	ENSMUST00000111963.7	5' UTR Exon	0.033201295702058986E0	0.9999999999998793E0	1.9528130968005581E0	1.9528130968005581E0	29.899000606711073E0	15.310733349595452E0	1.6153656092439124E-4	0.012500310930126868E0	11.763539657680669E0	11.763539657680669E0	29.899000606711073E0	2.541667004725858E0	0.008020655345305945E0	0.20895875543286657E0	6.023894287145948E0	6.023894287145948E0	15.310733349595452E0	2.541667004725858E0
chr5:75066127-75066886	.	.	Intergenic	0.0332394726520272E0	0.9999999999998793E0	2.3192159357399658E0	2.3192159357399658E0	21.263910180003908E0	9.168577126570785E0	0.0013568782171477025E0	0.06009001453001997E0	8.889010450233709E0	8.889010450233709E0	21.263910180003908E0	2.3921571809429967E0	0.0642262201000853E0	0.6669227380279563E0	3.832765338169166E0	3.832765338169166E0	9.168577126570785E0	2.3921571809429967E0
chr18:21373480-21374143	.	.	Intergenic	0.03335839667735932E0	0.9999999999998793E0	0.1150241421808247E0	-8.693827061348054E0	1.0793863040968072E0	9.383997860205284E0	0.5345060390753146E0	0.863612532886662E0	3.609750437192586E0	3.609750437192586E0	1.0793863040968072E0	0.2990196477228712E0	0.06357379103530002E0	0.6625782412052958E0	31.382546035577885E0	31.382546035577885E0	9.383997860205284E0	0.2990196477228712E0
chr2:78977231-78982827	Gm37004	ENSMUST00000193021.1	Intron 1	0.03337105709646006E0	0.9999999999998793E0	1.3662468808786967E0	1.3662468808786967E0	109.989464301577E0	80.5048237188565E0	2.4282548233530283E-11	3.118370625709062E-8	23.73119802793279E0	23.73119802793279E0	109.989464301577E0	4.6348045375591225E0	2.291789968661822E-9	1.4628536052630575E-6	17.369626500204824E0	17.369626500204824E0	80.5048237188565E0	4.6348045375591225E0
chr3:84678661-84680359	Gm37240	ENSMUST00000154148.7	5' UTR Exon	0.033698307695980007E0	0.9999999999998793E0	1.7788617329040295E0	1.7788617329040295E0	37.778520620705805E0	21.237468838587912E0	0.0010630248587927E0	0.05038298795806016E0	2.8391295574577056E0	2.8391295574577056E0	37.778520620705805E0	13.306374315138521E0	0.18115708685960713E0	0.8620384897188644E0	1.596037232653696E0	1.596037232653696E0	21.237468838587912E0	13.306374315138521E0
chr6:99260379-99260755	Foxp1	ENSMUST00000177235.7	TTS	0.03376266819643317E0	0.9999999999998793E0	4.458335748174934E0	4.458335748174934E0	11.0097402974695E0	2.469473121663493E0	0.11816289813906668E0	0.7979583267156364E0	2.3754486749656327E0	2.3754486749656327E0	11.0097402974695E0	4.634804537559114E0	0.4242192949233923E0	0.8620384897188644E0	0.5328106291541742E0	-1.8768394346551966E0	2.469473121663493E0	4.634804537559114E0
chr1:69768486-69768897	.	.	Intergenic	0.03376983690458988E0	0.9999999999998793E0	0.2314015095364683E0	-4.321492984221015E0	2.5905271294494177E0	11.194944815349864E0	0.4339112375282955E0	0.8565483502551655E0	2.4752574427219947E0	2.4752574427219947E0	2.5905271294494177E0	1.0465687668433643E0	0.02042122650676841E0	0.3694068538997067E0	10.696807672863951E0	10.696807672863951E0	11.194944815349864E0	1.0465687668433643E0
chr8:121897768-121899254	Slc7a5	ENSMUST00000045557.9	Intron 1	0.03376983690459001E0	0.9999999999998793E0	0.23140150953646865E0	-4.321492984221008E0	2.590527129449426E0	11.194944815349883E0	0.6501921714349347E0	0.904339224116021E0	0.6930720841341681E0	-1.4428513611960965E0	2.590527129449426E0	3.7377455949415217E0	0.06631515844134815E0	0.6753153107281775E0	2.9951061491452395E0	2.9951061491452395E0	11.194944815349883E0	3.7377455949415217E0
chr13:51780312-51781371	Sema4d	ENSMUST00000110040.8	5' UTR Exon	0.03379807603317055E0	0.9999999999998793E0	0.23754985882261415E0	-4.2096425775892845E0	2.6984657598245065E0	11.359576356724062E0	0.42546124210712705E0	0.8565483502551655E0	0.5469318845974388E0	-1.828381244834602E0	2.6984657598245065E0	4.933824185091481E0	0.12193939802140424E0	0.853211953218067E0	2.302387748442527E0	2.302387748442527E0	11.359576356724062E0	4.933824185091481E0
chr11:84072283-84073438	.	.	Intergenic	0.033840420538921424E0	0.9999999999998793E0	3.1142786478110267E0	3.1142786478110267E0	14.355837838213912E0	4.609683159952429E0	0.036148760686904195E0	0.47939072892524154E0	48.00968079368082E0	48.00968079368082E0	14.355837838213912E0	0.2990196477228707E0	0.14719599637816239E0	0.8620384897188644E0	15.415987528099329E0	15.415987528099329E0	4.609683159952429E0	0.2990196477228707E0
chr14:31665628-31666106	Btd	ENSMUST00000128014.1	CDS Exon 2	0.033894940459086705E0	0.9999999999998793E0	3.4492239485458414E0	3.4492239485458414E0	13.060574274072362E0	3.786525452943863E0	0.014787034104753016E0	0.28792811010505936E0	5.823730704866582E0	5.823730704866582E0	13.060574274072362E0	2.2426473571585883E0	0.5341876711639625E0	0.875173998899523E0	1.6884176822794614E0	1.6884176822794614E0	3.786525452943863E0	2.2426473571585883E0
chr11:97103041-97104425	Tbx21	ENSMUST00000001484.2	Intron 1	0.03389494045908681E0	0.9999999999998793E0	3.4492239485458387E0	3.4492239485458387E0	13.060574274072357E0	3.7865254529438648E0	0.014137764418418167E0	0.28109536917973943E0	14.559326758380648E0	14.559326758380648E0	13.060574274072357E0	0.8970589430966939E0	0.22005155265695622E0	0.8620384897188644E0	4.221044204601075E0	4.221044204601075E0	3.7865254529438648E0	0.8970589430966939E0
chr2:163204300-163205241	Tox2	ENSMUST00000128999.7	TSS	0.033898475856325196E0	0.9999999999998793E0	0.5825683717211557E0	-1.7165367166184684E0	24.39413045974334E0	41.8734206041304E0	6.708161794164219E-4	0.035717153860902115E0	7.093944336630167E0	7.093944336630167E0	24.39413045974334E0	3.43872594739463E0	8.368395764271805E-6	0.001317845191648602E0	12.177015919473327E0	12.177015919473327E0	41.8734206041304E0	3.43872594739463E0
chr9:114422176-114422892	Glb1	ENSMUST00000217583.1	Intron 3	0.033918567107390676E0	0.9999999999998793E0	0.1469532575042505E0	-6.804884879609258E0	1.4032021952636744E0	9.548629401584297E0	0.5807651773522536E0	0.8680136059037894E0	2.346337784345935E0	2.346337784345935E0	1.4032021952636744E0	0.5980392953757214E0	0.03767415035407612E0	0.5156081731978246E0	15.966558511151545E0	15.966558511151545E0	9.548629401584297E0	0.5980392953757214E0
chr10:116933715-116934764	Rab3ip	ENSMUST00000020375.6	Intron 3	0.033939849838067936E0	0.9999999999998793E0	3.7291740066797683E0	3.7291740066797683E0	12.278793300072094E0	3.29263082872456E0	0.4536616940442546E0	0.8565483502551655E0	1.3919830511673845E0	1.3919830511673845E0	12.278793300072094E0	8.82107960278288E0	0.12703304605236862E0	0.8620384897188644E0	0.37326846338466313E0	-2.6790369347904788E0	3.29263082872456E0	8.82107960278288E0
chr9:52168236-52168682	Zc3h12c	ENSMUST00000165519.1	TSS	0.03395431191782209E0	0.9999999999998793E0	0.21660586364883336E0	-4.6166801911753605E0	2.338223710268939E0	10.794831085735165E0	0.7295178505769869E0	0.926925570431842E0	1.4217513365583956E0	1.4217513365583956E0	2.338223710268939E0	1.6446080620040275E0	0.0245909040559967E0	0.40829530448399753E0	6.563771232266237E0	6.563771232266237E0	10.794831085735165E0	1.6446080620040275E0
chr1:165799981-165801319	Cd247	ENSMUST00000005907.11	Intron 1	0.03405635842508733E0	0.9999999999998793E0	2.834668490622251E0	2.834668490622251E0	15.866978663020896E0	5.59747240833014E0	0.5952131509959465E0	0.8823308729739933E0	1.2198466996886081E0	1.2198466996886081E0	15.866978663020896E0	13.00735466765724E0	0.09530962944839978E0	0.7868207456601425E0	0.4303313434089903E0	-2.3237907610405966E0	5.59747240833014E0	13.00735466765724E0
chr1:134195320-134196548	Mybph	ENSMUST00000191577.1	Intron 3	0.03406963923965741E0	0.9999999999998793E0	0.26579903121809406E0	-3.762240951057032E0	3.2381589116896694E0	12.182734063589146E0	0.3918886992290253E0	0.8565483502551655E0	2.4065002916146856E0	2.4065002916146856E0	3.2381589116896694E0	1.3455884144177548E0	0.015299077379002796E0	0.3114469473684032E0	9.053833945843461E0	9.053833945843461E0	12.182734063589146E0	1.3455884144177548E0
chr17:26233787-26235474	Fam234a	ENSMUST00000114988.7	5' UTR Exon	0.03406963923965815E0	0.9999999999998793E0	0.2657990312180951E0	-3.7622409510570174E0	3.2381589116896765E0	12.182734063589125E0	5.673935181654834E-4	0.03184233299295185E0	0.130472907441568E0	-7.664426428512354E0	3.2381589116896765E0	24.81863074247716E0	0.041943797600083405E0	0.5454405961048007E0	0.490870515380139E0	-2.0371971195409486E0	12.182734063589125E0	24.81863074247716E0
chr17:73162367-73165183	Lclat1	ENSMUST00000131335.1	TSS	0.03412441068746809E0	0.9999999999998793E0	1.4087125477594298E0	1.4087125477594298E0	92.07165167034232E0	65.35872191724503E0	0.8086626373650205E0	0.9565603199352659E0	0.9652404776210952E0	-1.0360112564534925E0	92.07165167034232E0	95.38726753073965E0	0.01855430433155193E0	0.34851270610438817E0	0.6851933555616574E0	-1.4594420565860473E0	65.35872191724503E0	95.38726753073965E0
chr15:5553249-5554529	5430437J10Rik	ENSMUST00000211750.1	Intron 3	0.03415840885713002E0	0.9999999999998793E0	3.6216172745550903E0	3.6216172745550903E0	12.52088112234041E0	3.457262370132299E0	0.016604263452131774E0	0.30904048086880304E0	5.981872152550941E0	5.981872152550941E0	12.52088112234041E0	2.093137533372548E0	0.5666547373069326E0	0.8798268675078365E0	1.6517129500620145E0	1.6517129500620145E0	3.457262370132299E0	2.093137533372548E0
chr6:101518178-101520683	Gm44169	ENSMUST00000205133.1	TSS	0.03416194909351201E0	0.9999999999998793E0	2.533145311704977E0	2.533145311704977E0	18.34956716086624E0	7.243787822229491E0	0.0029186040766287203E0	0.10228673734833332E0	9.440885757276098E0	9.440885757276098E0	18.34956716086624E0	1.9436277095847936E0	0.10340218577742882E0	0.8080498247426106E0	3.7269420406529092E0	3.7269420406529092E0	7.243787822229491E0	1.9436277095847936E0
chr8:72351282-72353539	Eps15l1	ENSMUST00000163643.2	Intron 22	0.03416194909351235E0	0.9999999999998793E0	2.5331453117049705E0	2.5331453117049705E0	18.349567160866233E0	7.243787822229507E0	3.6136867735700584E-7	9.484652878961627E-5	0.26313476836298466E0	-3.8003339741882267E0	18.349567160866233E0	69.73448349308855E0	6.610917473686337E-9	3.706366758253451E-6	0.1038766971429199E0	-9.626798189628026E0	7.243787822229507E0	69.73448349308855E0
chr9:56101708-56103938	Pstpip1	ENSMUST00000138646.7	Intron 1	0.03429964423563545E0	0.9999999999998793E0	2.2207080342195713E0	2.2207080342195713E0	22.667112374378853E0	10.207155567095882E0	0.0029391337130671162E0	0.1027725027648911E0	4.0975545502391295E0	4.0975545502391295E0	22.667112374378853E0	5.531863480147207E0	0.2459505159486055E0	0.8620384897188644E0	1.8451568090440773E0	1.8451568090440773E0	10.207155567095882E0	5.531863480147207E0
chr1:160043933-160048785	4930523C07Rik	ENSMUST00000060298.14	TSS	0.03432490615545302E0	0.9999999999998793E0	1.2957517671596765E0	1.2957517671596765E0	153.1649164231733E0	118.205446679741E0	0.00466384332850443E0	0.13963015030593662E0	0.7396730500718703E0	-1.3519486750299134E0	153.1649164231733E0	207.0711058193766E0	1.1559552628836654E-6	2.693225962700856E-4	0.5708447164176006E0	-1.7517898847791935E0	118.205446679741E0	207.0711058193766E0
chr10:13423938-13425950	Phactr2	ENSMUST00000105545.11	Intron 1	0.03443950546189664E0	0.9999999999998793E0	1.6478412719569848E0	1.6478412719569848E0	47.47516349539955E0	28.810519740786564E0	1.6564719201638175E-5	0.002149300578964418E0	26.46156301727923E0	26.46156301727923E0	47.47516349539955E0	1.7941178857952786E0	3.087554935788088E-4	0.021912092999228184E0	16.0583203416512E0	16.0583203416512E0	28.810519740786564E0	1.7941178857952786E0
chr4:155172380-155174365	Ski	ENSMUST00000084103.9	Intron 2	0.03451408557857786E0	0.9999999999998793E0	2.5059926430089057E0	2.5059926430089057E0	18.56544442154565E0	7.408419363615695E0	0.7949338126372558E0	0.9517067401372262E0	0.919817889393326E0	-1.08717172337185E0	18.56544442154565E0	20.183826206936082E0	0.01963923262817205E0	0.36115631457531594E0	0.36704732232929277E0	-2.724444340457169E0	7.408419363615695E0	20.183826206936082E0
chr10:14049095-14050829	Hivep2	ENSMUST00000191138.6	5' UTR Exon	0.0345625412483784E0	0.9999999999998793E0	1.6135334108012422E0	1.6135334108012422E0	51.00259055569943E0	31.609255943682477E0	6.994612163193367E-7	1.633181380692983E-4	9.475889882338366E0	9.475889882338366E0	51.00259055569943E0	5.382353656384356E0	1.467827786813806E-4	0.01242849190321552E0	5.872757154518955E0	5.872757154518955E0	31.609255943682477E0	5.382353656384356E0
chr16:10586358-10587261	Clec16a	ENSMUST00000115827.7	Intron 9	0.03460996966321418E0	0.9999999999998793E0	0.30383206332048474E0	-3.2912918704869907E0	4.10166795464314E0	13.499786394553968E0	0.0371808758629003E0	0.48551175668304614E0	0.3082483520681299E0	-3.244137375887665E0	4.10166795464314E0	13.306374315138521E0	0.9702010821301326E0	0.9998571342969699E0	1.0145352952528477E0	1.0145352952528477E0	13.499786394553968E0	13.306374315138521E0
chr8:34148963-34150354	.	.	Intergenic	0.0346806480501828E0	0.9999999999998793E0	1.7773925837052231E0	1.7773925837052231E0	37.45470472972557E0	21.07283729723121E0	0.42883057078647624E0	0.8565483502551655E0	1.212004837862891E0	1.212004837862891E0	37.45470472972557E0	30.903098370274545E0	0.17534588528966852E0	0.8620384897188644E0	0.6819004698085875E0	-1.4664896774168588E0	21.07283729723121E0	30.903098370274545E0
chr14:21112169-21113813	Adk	ENSMUST00000045376.10	Intron 3	0.03469062225665135E0	0.9999999999998793E0	1.5296678534098518E0	1.5296678534098518E0	62.45423096833873E0	40.82862225882513E0	6.581054104007621E-5	0.006282460613819593E0	2.6107912761822636E0	2.6107912761822636E0	62.45423096833873E0	23.921571800126813E0	0.03786975803400458E0	0.5172142613865262E0	1.706770048388237E0	1.706770048388237E0	40.82862225882513E0	23.921571800126813E0
chr19:30919017-30920377	Prkg1	ENSMUST00000073581.5	Intron 4	0.03471564741272704E0	0.9999999999998793E0	3.5166017266426906E0	3.5166017266426906E0	12.73675838303365E0	3.6218939115387028E0	0.020798875750705985E0	0.3520535264170576E0	21.297527573053102E0	21.297527573053102E0	12.73675838303365E0	0.5980392953757202E0	0.19692261694746016E0	0.8620384897188644E0	6.0562808155662005E0	6.0562808155662005E0	3.6218939115387028E0	0.5980392953757202E0
chr3:115681247-115682279	.	.	Intergenic	0.034731948752241656E0	0.9999999999998793E0	4.088093333161567E0	4.088093333161567E0	11.441494818864626E0	2.798736204492727E0	0.002561959651083684E0	0.09333427190793256E0	0.35429032082631384E0	-2.8225439455068737E0	11.441494818864626E0	32.29412192853462E0	8.678781836524424E-5	0.008344084073541883E0	0.08666395112665393E0	-11.538823086182198E0	2.798736204492727E0	32.29412192853462E0
chr12:15970467-15971040	.	.	Intergenic	0.03474009172970025E0	0.9999999999998793E0	3.0456233709097784E0	3.0456233709097784E0	14.540764434512795E0	4.774314701351017E0	0.008070003617632165E0	0.19818713687068726E0	8.841477048819911E0	8.841477048819911E0	14.540764434512795E0	1.6446080620040264E0	0.23851259424615212E0	0.8620384897188644E0	2.903010639223856E0	2.903010639223856E0	4.774314701351017E0	1.6446080620040264E0
chrX:42360589-42361307	.	.	Intergenic	0.0347815328402701E0	0.9999999999998793E0	0.31624872968314793E0	-3.1620680374017875E0	4.42548384574241E0	13.993681018660016E0	0.08739728528593017E0	0.7143360627101943E0	0.3844149817685116E0	-2.601355429487875E0	4.42548384574241E0	11.512256430232899E0	0.6237395032116946E0	0.896125467039406E0	1.2155463269486013E0	1.2155463269486013E0	13.993681018660016E0	11.512256430232899E0
chr2:26501553-26504290	Notch1	ENSMUST00000028288.4	TSS	0.03481672014486725E0	0.9999999999998793E0	1.3567154507216614E0	1.3567154507216614E0	112.79586868956584E0	83.13892837998394E0	0.09192249138799596E0	0.7301576783235297E0	1.2700973762731622E0	1.2700973762731622E0	112.79586868956584E0	88.8088352883162E0	0.6655143241768673E0	0.9068302031393283E0	0.9361560492272528E0	-1.068197979199565E0	83.13892837998394E0	88.8088352883162E0
chr14:31664421-31665628	Btd	ENSMUST00000128014.1	Intron 1	0.03482094937605267E0	0.9999999999998793E0	2.0509689341956543E0	2.0509689341956543E0	26.337025805753708E0	12.84126022907437E0	0.007901407672074853E0	0.19540315218013082E0	2.710089559131241E0	2.710089559131241E0	26.337025805753708E0	9.718138545279821E0	0.5121977970563928E0	0.8721782434142846E0	1.3213703600996178E0	1.3213703600996178E0	12.84126022907437E0	9.718138545279821E0
chr13:104287418-104288834	Adamts6	ENSMUST00000223562.1	TSS	0.03490061078903705E0	0.9999999999998793E0	1.8320323859518215E0	1.8320323859518215E0	34.383575975172526E0	18.767995718213648E0	0.2471667521710119E0	0.8565483502551655E0	1.353614657406453E0	1.353614657406453E0	34.383575975172526E0	25.401302938793528E0	0.320083465258344E0	0.8620384897188644E0	0.7388595680873787E0	-1.3534371661297053E0	18.767995718213648E0	25.401302938793528E0
chr1:171983975-171985165	.	.	Intergenic	0.03498501137828494E0	0.9999999999998793E0	3.704352496761398E0	3.704352496761398E0	12.197065231299375E0	3.29263082872456E0	0.045449093664311E0	0.5347959233115268E0	3.263214395277804E0	3.263214395277804E0	12.197065231299375E0	3.7377455949415226E0	0.8667713900711665E0	0.9708966414805933E0	0.8809135734600668E0	-1.1351851420249817E0	3.29263082872456E0	3.7377455949415226E0
chr18:80614541-80615533	Nfatc1	ENSMUST00000078049.10	3' UTR Exon	0.035097584674645806E0	0.9999999999998793E0	2.0324765913494525E0	2.0324765913494525E0	26.768780327085967E0	13.170523311814858E0	3.24775026064189E-4	0.02133645334142647E0	9.423348508196938E0	9.423348508196938E0	26.768780327085967E0	2.8406866522872454E0	0.019038567649528704E0	0.354644691427667E0	4.636387227436825E0	4.636387227436825E0	13.170523311814858E0	2.8406866522872454E0
chr8:125336785-125338016	.	.	Intergenic	0.03519884638482074E0	0.9999999999998793E0	0.4670295306072443E0	-2.14119222546757E0	11.225617558167382E0	24.036205041620242E0	0.7166181994173737E0	0.9235482004916233E0	1.1731688923102939E0	1.1731688923102939E0	11.225617558167382E0	9.568628721531338E0	0.015970541626956603E0	0.31844551514319586E0	2.5119801113752023E0	2.5119801113752023E0	24.036205041620242E0	9.568628721531338E0
chr1:171983245-171983600	.	.	Intergenic	0.03527100201595996E0	0.9999999999998793E0	3.9338256602376416E0	3.9338256602376416E0	11.657372079561068E0	2.963367745904847E0	0.035825633664545935E0	0.4769956282764211E0	3.8985304721173994E0	3.8985304721173994E0	11.657372079561068E0	2.9901964760659228E0	0.9912271564849353E0	0.9998571342969699E0	0.9910277701228606E0	-1.0090534595978347E0	2.963367745904847E0	2.9901964760659228E0
chr18:80696300-80698645	Nfatc1	ENSMUST00000170905.7	CDS Exon 2	0.03527858262285233E0	0.9999999999998793E0	1.3972667495372395E0	1.3972667495372395E0	94.94089289042898E0	67.94757903018333E0	7.12357024767786E-8	2.5277660964728742E-5	3.038346471336352E0	3.038346471336352E0	94.94089289042898E0	31.247553162912084E0	3.260111269547242E-4	0.0227918329863817E0	2.1744927891131893E0	2.1744927891131893E0	67.94757903018333E0	31.247553162912084E0
chr14:75178244-75180132	Lcp1	ENSMUST00000124499.7	5' UTR Exon	0.03535798884623623E0	0.9999999999998793E0	1.6198105662229383E0	1.6198105662229383E0	49.8676472169936E0	30.786098236952856E0	0.528295820174101E0	0.863612532886662E0	1.1395356137848243E0	1.1395356137848243E0	49.8676472169936E0	43.761376664099586E0	0.13489677592408872E0	0.8620384897188644E0	0.7034993088370727E0	-1.4214655045689542E0	30.786098236952856E0	43.761376664099586E0
chr2:6597818-6598755	Celf2	ENSMUST00000150624.8	Intron 7	0.035473041202230944E0	0.9999999999998793E0	2.3577737132308907E0	2.3577737132308907E0	20.184523876627985E0	8.560840153302433E0	0.0023536877659323338E0	0.08803722620472214E0	15.000518479762603E0	15.000518479762603E0	20.184523876627985E0	1.3455884144177546E0	0.04600987151027986E0	0.5716023113472788E0	6.362153583944736E0	6.362153583944736E0	8.560840153302433E0	1.3455884144177546E0
chr7:75384467-75385606	.	.	Intergenic	0.03559679131800124E0	0.9999999999998793E0	0.48221088755490066E0	-2.073781463273469E0	12.305003861646576E0	25.51788891379112E0	0.29697296717502214E0	0.8565483502551655E0	0.6801843800924849E0	-1.4701895975088837E0	12.305003861646576E0	18.09068867469944E0	0.2630658273720484E0	0.8620384897188644E0	1.4105537590439508E0	1.4105537590439508E0	25.51788891379112E0	18.09068867469944E0
chr6:129228183-129233150	2310001H17Rik	ENSMUST00000203780.2	TTS	0.03561781422991995E0	0.9999999999998793E0	1.2729898124362116E0	1.2729898124362116E0	172.27005398627878E0	135.32712697566154E0	0.016370310785515877E0	0.30663561996283284E0	1.3213673620956625E0	1.3213673620956625E0	172.27005398627878E0	130.3725662733654E0	0.761176018453568E0	0.9420644864460961E0	1.038003092551752E0	1.038003092551752E0	135.32712697566154E0	130.3725662733654E0
chr1:85731961-85734010	A630001G21Rik	ENSMUST00000162038.7	5' UTR Exon	0.035638574073888166E0	0.9999999999998793E0	0.4966951592944969E0	-2.0133073199674314E0	13.492328795455197E0	27.164204327297305E0	0.001550465680294542E0	0.06551248896608426E0	0.3653593561324863E0	-2.7370313178387056E0	13.492328795455197E0	36.92892646373786E0	0.2243981340202618E0	0.8620384897188644E0	0.7355806661201223E0	-1.3594702064079227E0	27.164204327297305E0	36.92892646373786E0
chr10:96720124-96721365	.	.	Intergenic	0.03565457581522105E0	0.9999999999998793E0	3.200529398857004E0	3.200529398857004E0	13.699610296383586E0	4.2804200771522645E0	0.060277517543990466E0	0.6135418616741728E0	0.5333614268390925E0	-1.8749012389710846E0	13.699610296383586E0	25.68541631811061E0	5.988126616028694E-4	0.035513270623439695E0	0.16664787613873205E0	-6.000676535280377E0	4.2804200771522645E0	25.68541631811061E0
chr18:80684144-80687151	Nfatc1	ENSMUST00000170905.7	Intron 2	0.0357297911426372E0	0.9999999999998793E0	1.3293930126553504E0	1.3293930126553504E0	126.7199519989894E0	95.32166243741344E0	5.728958543095198E-7	1.3981899206319193E-4	2.218768069951714E0	2.218768069951714E0	126.7199519989894E0	57.11275266447617E0	0.0022054082052766115E0	0.08880328455685103E0	1.6690083736185073E0	1.6690083736185073E0	95.32166243741344E0	57.11275266447617E0
chr5:100643324-100644447	.	.	Intergenic	0.03574963050746072E0	0.9999999999998793E0	2.1958656465393522E0	2.1958656465393522E0	22.775051004714726E0	10.371787108472608E0	0.0756604574709382E0	0.676254911654861E0	0.6224198647294731E0	-1.6066325267986705E0	22.775051004714726E0	36.591137743673414E0	3.3867523713101917E-4	0.023389189407832543E0	0.2834507956852444E0	-3.527949172209916E0	10.371787108472608E0	36.591137743673414E0
chr6:99521359-99523595	Foxp1	ENSMUST00000177227.7	TSS	0.035846760714705335E0	0.9999999999998793E0	1.5448285320466224E0	1.5448285320466224E0	59.25830805489061E0	38.35914913895584E0	0.1255442302585088E0	0.8137397004050358E0	1.357365061877632E0	1.357365061877632E0	59.25830805489061E0	43.656868530945594E0	0.5588373520532927E0	0.8786340291477234E0	0.8786509529827011E0	-1.1381083655635527E0	38.35914913895584E0	43.656868530945594E0
chr15:100057877-100058539	Dip2b	ENSMUST00000100203.9	Intron 1	0.03584838372049826E0	0.9999999999998793E0	3.3328245177946796E0	3.3328245177946796E0	13.168512904418293E0	3.9511569943478033E0	0.013450722142075634E0	0.27248105064028233E0	6.291279332801733E0	6.291279332801733E0	13.168512904418293E0	2.0931375333725457E0	0.45737091166210625E0	0.8644800785043375E0	1.887671942885446E0	1.887671942885446E0	3.9511569943478033E0	2.0931375333725457E0
chr17:70985456-70988295	Myl12b	ENSMUST00000038446.8	5' UTR Exon	0.035949783600537986E0	0.9999999999998793E0	1.5582418536922291E0	1.5582418536922291E0	57.20747407884071E0	36.71283372557894E0	0.4396744336515654E0	0.8565483502551655E0	0.8696216964422423E0	-1.149925311306233E0	57.20747407884071E0	65.78432243915417E0	0.0046380229545359775E0	0.14707056253297354E0	0.5580787695964446E0	-1.7918617486974382E0	36.71283372557894E0	65.78432243915417E0
chr7:126354339-126355655	.	.	Intergenic	0.03595744325446816E0	0.9999999999998793E0	0.24705185317388204E0	-4.04773324770882E0	2.8064043901988946E0	11.359576356724062E0	0.27837024788377407E0	0.8565483502551655E0	0.4578220068279952E0	-2.184254983565485E0	2.8064043901988946E0	6.129902775191993E0	0.2183643148283326E0	0.8620384897188644E0	1.8531413585704501E0	1.8531413585704501E0	11.359576356724062E0	6.129902775191993E0
chr6:99378547-99379434	Foxp1	ENSMUST00000177227.7	5' UTR Exon	0.03606642989548758E0	0.9999999999998793E0	4.589463270157469E0	4.589463270157469E0	10.577985776071584E0	2.304841580246189E0	1.769223108600542E-5	0.0022506061838922908E0	0.23121277320853045E0	-4.325020569249007E0	10.577985776071584E0	45.75000606273302E0	9.590326876793944E-6	0.0014674288385537492E0	0.05037904425817473E0	-19.849523045243867E0	2.304841580246189E0	45.75000606273302E0
chr12:76533331-76534559	Plekhg3	ENSMUST00000219063.1	TSS	0.03613176164375323E0	0.9999999999998793E0	0.5266025486680934E0	-1.8989653630223486E0	16.298733184389764E0	30.95072977829911E0	0.009451075277108197E0	0.2198653964562201E0	4.542269299957865E0	4.542269299957865E0	16.298733184389764E0	3.5882357711685997E0	1.1170416941367913E-4	0.010041553222634841E0	8.625612070139757E0	8.625612070139757E0	30.95072977829911E0	3.5882357711685997E0
chr12:76525753-76526933	.	.	Intergenic	0.036146218516397564E0	0.9999999999998793E0	0.2640762597197483E0	-3.7867849274344194E0	3.130220281317934E0	11.85347098084428E0	0.2966962460719766E0	0.8565483502551655E0	3.4894254222718666E0	3.4894254222718666E0	3.130220281317934E0	0.8970589430966934E0	0.0184135045550392E0	0.34738019882227394E0	13.213703594465589E0	13.213703594465589E0	11.85347098084428E0	0.8970589430966934E0
chr14:74887931-74890131	Lrch1	ENSMUST00000227433.1	Intron 1	0.03618358876305599E0	0.9999999999998793E0	2.4657675336043554E0	2.4657675336043554E0	18.673383051885178E0	7.573050905001256E0	0.0031090450800514333E0	0.10704820297490847E0	6.57354553232749E0	6.57354553232749E0	18.673383051885178E0	2.8406866522872494E0	0.15873980337069218E0	0.8620384897188644E0	2.6659226560253053E0	2.6659226560253053E0	7.573050905001256E0	2.8406866522872494E0
chr11:11505694-11507061	Spata48	ENSMUST00000109678.2	Intron 4	0.036189208387357945E0	0.9999999999998793E0	2.058313899800677E0	2.058313899800677E0	25.753617640562602E0	12.511997146332504E0	0.45301386826044154E0	0.8565483502551655E0	1.248215087134601E0	1.248215087134601E0	25.753617640562602E0	20.63235567812478E0	0.16274915909971188E0	0.8620384897188644E0	0.6064260107534984E0	-1.6490057851533722E0	12.511997146332504E0	20.63235567812478E0
chr14:59051081-59051960	AC129308.2	ENSMUST00000224109.1	Intron 2	0.03623988115987856E0	0.9999999999998793E0	2.1918121841910936E0	2.1918121841910936E0	22.733009356186408E0	10.371787108472628E0	0.018628641673051418E0	0.3285151975146437E0	76.0251359042974E0	76.0251359042974E0	22.733009356186408E0	0.2990196477228711E0	0.05589599267571643E0	0.6267507755348111E0	34.68597193347345E0	34.68597193347345E0	10.371787108472628E0	0.2990196477228711E0
chr2:4300220-4301963	Gm13187	ENSMUST00000132211.1	TSS	0.03625560211761755E0	0.9999999999998793E0	2.9722238323202705E0	2.9722238323202705E0	14.679653729246173E0	4.938946242748643E0	0.009047594886429948E0	0.21398623178773463E0	14.026458837982116E0	14.026458837982116E0	14.679653729246173E0	1.0465687668433659E0	0.1493279417457805E0	0.8620384897188644E0	4.719179856327423E0	4.719179856327423E0	4.938946242748643E0	1.0465687668433659E0
chr12:79692378-79693497	Rad51b	ENSMUST00000221257.1	Intron 2	0.03626541130016461E0	0.9999999999998793E0	0.1857639896070797E0	-5.3831746514228005E0	1.8349567168009782E0	9.87789248434103E0	0.4019624024837746E0	0.8565483502551655E0	0.47204428810296545E0	-2.1184452925355033E0	1.8349567168009782E0	3.8872554187134343E0	0.11933060142799028E0	0.8460433761315591E0	2.541096846064805E0	2.541096846064805E0	9.87789248434103E0	3.8872554187134343E0
chr2:151562815-151564531	.	.	Intergenic	0.03627550759999253E0	0.9999999999998793E0	1.6951682946197286E0	1.6951682946197286E0	42.4198817247053E0	25.023994289735818E0	0.020319472114958204E0	0.3469329559127709E0	1.8187588743345497E0	1.8187588743345497E0	42.4198817247053E0	23.32353250522335E0	0.8068391897341898E0	0.955853144374849E0	1.0729075573835847E0	1.0729075573835847E0	25.023994289735818E0	23.32353250522335E0
chr15:77794848-77796744	Myh9	ENSMUST00000124844.7	TTS	0.03641387297920536E0	0.9999999999998793E0	1.6506641008124017E0	1.6506641008124017E0	46.19773378603635E0	27.987362034043976E0	0.0038955715827150763E0	0.12425398975228368E0	2.1164016263805094E0	2.1164016263805094E0	46.19773378603635E0	21.82843426795327E0	0.38409985061408847E0	0.8620384897188644E0	1.282151605126014E0	1.282151605126014E0	27.987362034043976E0	21.82843426795327E0
chr18:65395569-65396624	.	.	Intergenic	0.03645184704590112E0	0.9999999999998793E0	2.2553665190993777E0	2.2553665190993777E0	21.53565905562121E0	9.548629401584321E0	0.042337107309136146E0	0.5175053554613546E0	2.182451000505477E0	2.182451000505477E0	21.53565905562121E0	9.867648369027915E0	0.9422869920766325E0	0.9998571342969699E0	0.9676702132551751E0	-1.0334099224115516E0	9.548629401584321E0	9.867648369027915E0
chr3:55414574-55415628	Dclk1	ENSMUST00000197870.4	Intron 2	0.03645245329545078E0	0.9999999999998793E0	3.571036095578172E0	3.571036095578172E0	12.346008715626576E0	3.4572623701322978E0	0.016496533171903336E0	0.30793052826660816E0	13.762761979728468E0	13.762761979728468E0	12.346008715626576E0	0.8970589430966934E0	0.254877835734653E0	0.8620384897188644E0	3.8539968825210646E0	3.8539968825210646E0	3.4572623701322978E0	0.8970589430966934E0
chr7:129772025-129772881	.	.	Intergenic	0.036498100508773036E0	0.9999999999998793E0	0.17780002993436114E0	-5.624296015974645E0	1.7270180864190714E0	9.713260942962938E0	0.0737126789625008E0	0.6689607520159657E0	0.22213848854737983E0	-4.501696246063682E0	1.7270180864190714E0	7.774510836516817E0	0.6436121340840095E0	0.9009066598331948E0	1.2493726161316576E0	1.2493726161316576E0	9.713260942962938E0	7.774510836516817E0
chr3:146221047-146221341	Lpar3	ENSMUST00000039164.3	TSS	0.03653307253534333E0	0.9999999999998793E0	4.370917400186322E0	4.370917400186322E0	10.7938630367709E0	2.4694731216633796E0	0.036863369673681534E0	0.48276827446995846E0	24.065002906908163E0	24.065002906908163E0	10.7938630367709E0	0.4485294715535806E0	0.29328717699031137E0	0.8620384897188644E0	5.505709832421525E0	5.505709832421525E0	2.4694731216633796E0	0.4485294715535806E0
chr6:121225735-121226870	Gm15856	ENSMUST00000124853.1	TSS	0.03654530042252693E0	0.9999999999998793E0	0.4125995306130781E0	-2.423657628776525E0	7.879520017261519E0	19.097258800933215E0	0.9026781807833921E0	0.9891273779796242E0	0.9411135070531759E0	-1.0625710846837275E0	7.879520017261519E0	8.372550131528715E0	0.046659499059120584E0	0.5758924647602427E0	2.2809369309140592E0	2.2809369309140592E0	19.097258800933215E0	8.372550131528715E0
chr8:107291003-107292704	Nfat5	ENSMUST00000149972.1	TSS	0.036660155134328576E0	0.9999999999998793E0	1.9985098236023173E0	1.9985098236023173E0	27.308473478749722E0	13.66441793592295E0	2.832894456505446E-4	0.019180581946992046E0	9.613335373249159E0	9.613335373249159E0	27.308473478749722E0	2.8406866522872467E0	0.016005818830518537E0	0.3187953646057113E0	4.810251748435795E0	4.810251748435795E0	13.66441793592295E0	2.8406866522872467E0
chr19:3340075-3341219	Cpt1a	ENSMUST00000025835.4	5' UTR Exon	0.03672172163334038E0	0.9999999999998793E0	0.3032323947745607E0	-3.297800687632513E0	3.993729324275794E0	13.170523311814845E0	0.7943645721752057E0	0.951595603241841E0	1.2141887836427634E0	1.2141887836427634E0	3.993729324275794E0	3.289216123619556E0	0.02440702163824788E0	0.40705198351901417E0	4.00415260561279E0	4.00415260561279E0	13.170523311814845E0	3.289216123619556E0
chr4:133158053-133160155	Wasf2	ENSMUST00000138831.1	5' UTR Exon	0.03672373671635426E0	0.9999999999998793E0	1.4905142791832557E0	1.4905142791832557E0	68.21721437115221E0	45.76756849892951E0	1.2215174887114723E-4	0.010081145684533594E0	2.3398587451003174E0	2.3398587451003174E0	68.21721437115221E0	29.15441563043051E0	0.05702358058967007E0	0.6309677617139685E0	1.5698331628077187E0	1.5698331628077187E0	45.76756849892951E0	29.15441563043051E0
chr7:25125250-25126801	Pou2f2	ENSMUST00000108418.10	Intron 1	0.03677537592847559E0	0.9999999999998793E0	2.6934301819566544E0	2.6934301819566544E0	16.40667181473167E0	6.091367032507584E0	0.005667037997218269E0	0.15929416303707158E0	6.455083134110747E0	6.455083134110747E0	16.40667181473167E0	2.5416670047258587E0	0.24180145702855185E0	0.8620384897188644E0	2.396603103861197E0	2.396603103861197E0	6.091367032507584E0	2.5416670047258587E0
chr8:123033402-123035739	Ankrd11	ENSMUST00000098334.12	5' UTR Exon	0.036778696575491E0	0.9999999999998793E0	1.5686283008885349E0	1.5686283008885349E0	55.264578733098865E0	35.2311498535343E0	0.3462050744022355E0	0.8565483502551655E0	0.8420010133476953E0	-1.1876470267228298E0	55.264578733098865E0	65.63481261545459E0	0.002892514753267216E0	0.10682103525477385E0	0.5367753551754432E0	-1.8629767375835529E0	35.2311498535343E0	65.63481261545459E0
chr7:114316318-114319621	4933406I18Rik	ENSMUST00000163996.1	TTS	0.036826483007220065E0	0.9999999999998793E0	1.3940255982890115E0	1.3940255982890115E0	94.55424016747479E0	67.82819503711269E0	0.5898766684588646E0	0.8778732666059144E0	0.9259564813199034E0	-1.0799643613645336E0	94.55424016747479E0	102.11520959677561E0	0.009005960889833532E0	0.2246762301269687E0	0.6642320502983567E0	-1.5054979649820037E0	67.82819503711269E0	102.11520959677561E0
chr6:70761910-70765669	Rpia	ENSMUST00000066134.5	TTS	0.03686125959353336E0	0.9999999999998793E0	0.6563136057033876E0	-1.523661845968095E0	40.692863639506626E0	62.00216373069865E0	5.192347859950651E-5	0.005269182885197146E0	4.320240999302705E0	4.320240999302705E0	40.692863639506626E0	9.419118897782447E0	7.117708968547156E-8	2.66871166753161E-5	6.582586376024607E0	6.582586376024607E0	62.00216373069865E0	9.419118897782447E0
chr2:169633485-169634595	Tshz2	ENSMUST00000109157.1	TSS	0.03700788809789098E0	0.9999999999998793E0	0.394596709899296E0	-2.534232990070311E0	7.01601097441149E0	17.78020647004894E0	0.06660390012098412E0	0.6410959683903753E0	7.821125945405392E0	7.821125945405392E0	7.01601097441149E0	0.8970589430966937E0	0.005779995366710737E0	0.16924686215884563E0	19.820555390341195E0	19.820555390341195E0	17.78020647004894E0	0.8970589430966937E0
chr3:37281740-37283349	.	.	Intergenic	0.03701334255493421E0	0.9999999999998793E0	3.559175597418049E0	3.559175597418049E0	12.305003861646552E0	3.4572623701322955E0	0.08634150941406735E0	0.710606366447218E0	2.494009393125224E0	2.494009393125224E0	12.305003861646552E0	4.9338241850914795E0	0.6121163726330426E0	0.8899039646769143E0	0.7007267061884965E0	-1.4270898927762552E0	3.4572623701322955E0	4.9338241850914795E0
chr2:93192048-93193123	Trp53i11	ENSMUST00000090554.10	5' UTR Exon	0.03712016929871239E0	0.9999999999998793E0	0.40446659103832705E0	-2.472392089128668E0	7.447765495838601E0	18.41379649359681E0	0.1612146898430998E0	0.8565483502551655E0	0.5299420856319068E0	-1.886998649687527E0	7.447765495838601E0	14.053923433836795E0	0.44556671521619406E0	0.8644800785043375E0	1.3102246202126737E0	1.3102246202126737E0	18.41379649359681E0	14.053923433836795E0
chr12:55390643-55392334	Psma6	ENSMUST00000163070.7	Intron 1	0.03731416345889666E0	0.9999999999998793E0	3.3055062840468588E0	3.3055062840468588E0	13.060574274072362E0	3.9511569943478033E0	0.0329434245635199E0	0.4543219174048303E0	3.494238423221711E0	3.494238423221711E0	13.060574274072362E0	3.7377455949415226E0	0.938660510442283E0	0.9998571342969699E0	1.057096288119529E0	1.057096288119529E0	3.9511569943478033E0	3.7377455949415226E0
chr18:80661196-80662349	Nfatc1	ENSMUST00000170905.7	Intron 6	0.03732492760959248E0	0.9999999999998793E0	2.262020591859392E0	2.262020591859392E0	21.226796393748767E0	9.383997860205259E0	0.0018181922438876151E0	0.07340338769644039E0	15.032010612176512E0	15.032010612176512E0	21.226796393748767E0	1.4121062671785396E0	0.03588565438577862E0	0.5033276811282145E0	6.645390703459567E0	6.645390703459567E0	9.383997860205259E0	1.4121062671785396E0
chr12:73754218-73758068	Prkch	ENSMUST00000221153.1	3' UTR Exon	0.03746987060944522E0	0.9999999999998793E0	0.6847124488244642E0	-1.4604670934738098E0	50.83909488988629E0	74.24882514867146E0	1.8872459613283221E-6	3.812413550306556E-4	5.484491792895677E0	5.484491792895677E0	50.83909488988629E0	9.269609074033182E0	2.337672010559105E-9	1.4833628987943667E-6	8.009919787951315E0	8.009919787951315E0	74.24882514867146E0	9.269609074033182E0
chr9:123936512-123937006	.	.	Intergenic	0.0375567685639008E0	0.9999999999998793E0	3.1082079292003324E0	3.1082079292003324E0	13.816144686490778E0	4.445051618552863E0	0.021017277063258285E0	0.3544156211731844E0	4.017809182193967E0	4.017809182193967E0	13.816144686490778E0	3.438725947394626E0	0.7207776260304534E0	0.9281084391263625E0	1.292644917493552E0	1.292644917493552E0	4.445051618552863E0	3.438725947394626E0
chr5:139371460-139372914	3110082I17Rik	ENSMUST00000196267.1	Intron 2	0.03768847090999769E0	0.9999999999998793E0	0.6482501442115972E0	-1.5426143887961667E0	37.886459251260575E0	58.44419718153421E0	0.003465780285588763E0	0.1148231316791513E0	0.5532848925165278E0	-1.8073871409205844E0	37.886459251260575E0	68.47549926574007E0	0.3737440804808083E0	0.8620384897188644E0	0.8535052362995363E0	-1.1716389747479552E0	58.44419718153421E0	68.47549926574007E0
chr12:84201162-84202560	Elmsan1	ENSMUST00000046266.12	5' UTR Exon	0.03769115474951622E0	0.9999999999998793E0	0.6015018351761804E0	-1.6625053183870988E0	26.768780327086084E0	44.50323966051655E0	4.377842848908455E-4	0.02630925023065851E0	6.173917988570024E0	6.173917988570024E0	26.768780327086084E0	4.335784890023483E0	3.685600728313083E-6	6.975079027447395E-4	10.264171491283443E0	10.264171491283443E0	44.50323966051655E0	4.335784890023483E0
chr1:58721455-58723026	Cflar	ENSMUST00000123553.1	TTS	0.03770340397386912E0	0.9999999999998793E0	1.6245243006741084E0	1.6245243006741084E0	48.14062913184305E0	29.633677447525248E0	0.23211987272609172E0	0.8565483502551655E0	1.2983457219886667E0	1.2983457219886667E0	48.14062913184305E0	37.078436287452305E0	0.3630475791891817E0	0.8620384897188644E0	0.7992159436765018E0	-1.2512262898558608E0	29.633677447525248E0	37.078436287452305E0
chr6:99339597-99340929	Foxp1	ENSMUST00000177227.7	5' UTR Exon	0.03776409418675344E0	0.9999999999998793E0	5.042716436494508E0	5.042716436494508E0	9.962282160452643E0	1.97557849740566E0	0.05191704816886963E0	0.571066354351022E0	3.919585902452697E0	3.919585902452697E0	9.962282160452643E0	2.5416670047258574E0	0.7905142107309618E0	0.9519227659753683E0	0.7772766824813641E0	-1.2865431609341709E0	1.97557849740566E0	2.5416670047258574E0
chr16:45360793-45361721	.	.	Intergenic	0.03787509283205497E0	0.9999999999998793E0	1.9906105752890157E0	1.9906105752890157E0	27.200534848417135E0	13.66441793592295E0	5.534105528347339E-4	0.03130469667852189E0	18.19314219844173E0	18.19314219844173E0	27.200534848417135E0	1.4950982382112585E0	0.01021328924365524E0	0.243370477265479E0	9.139478321017295E0	9.139478321017295E0	13.66441793592295E0	1.4950982382112585E0
chr10:13377673-13378483	Phactr2	ENSMUST00000105546.7	Intron 1	0.037894372138228834E0	0.9999999999998793E0	5.769610967969348E0	5.769610967969348E0	9.498599472563443E0	1.6463154145567178E0	0.0343257386511419E0	0.46529535128356964E0	12.706321531051692E0	12.706321531051692E0	9.498599472563443E0	0.7475491194954242E0	0.5713384368203916E0	0.8802935339883478E0	2.2022839324162895E0	2.2022839324162895E0	1.6463154145567178E0	0.7475491194954242E0
chr1:171999214-172000447	.	.	Intergenic	0.03789449101192174E0	0.9999999999998793E0	5.76961096797543E0	5.76961096797543E0	9.498599472563436E0	1.646315414554981E0	0.038068197131907434E0	0.49127056217373494E0	15.882901919673877E0	15.882901919673877E0	9.498599472563436E0	0.59803929537572E0	0.5024114658636692E0	0.8692466617758743E0	2.752854916532999E0	2.752854916532999E0	1.646315414554981E0	0.59803929537572E0
chr13:95063829-95065124	Pde8b	ENSMUST00000162412.7	Intron 8	0.03794661048039943E0	0.9999999999998793E0	0.43176135311401675E0	-2.3160942793690165E0	8.743029060095546E0	20.249679590444362E0	0.04000323855094668E0	0.5024307851852173E0	9.746326177758364E0	9.746326177758364E0	8.743029060095546E0	0.8970589430966927E0	0.003868916962528113E0	0.130097156950996E0	22.573410305170636E0	22.573410305170636E0	20.249679590444362E0	0.8970589430966927E0
chr13:45850526-45850776	Atxn1	ENSMUST00000180110.8	5' UTR Exon	0.03796016095982574E0	0.9999999999998793E0	5.364307718222246E0	5.364307718222246E0	9.714476733266647E0	1.8109469559822462E0	0.030656609594723758E0	0.4365127305717576E0	8.121938482472927E0	8.121938482472927E0	9.714476733266647E0	1.1960785906259206E0	0.7248009661267204E0	0.9287381926771259E0	1.514070204228435E0	1.514070204228435E0	1.8109469559822462E0	1.1960785906259206E0
chr18:75277988-75280015	Dym	ENSMUST00000039608.7	Intron 16	0.03797122656921439E0	0.9999999999998793E0	0.6671400244525396E0	-1.498935700673345E0	43.82308391906792E0	65.68798499989487E0	0.03186795352052739E0	0.44599010769588104E0	0.6586780574944998E0	-1.5181923682167753E0	43.82308391906792E0	66.53187155765221E0	0.9414964407970686E0	0.9998571342969699E0	0.987316055628676E0	-1.0128468936557984E0	65.68798499989487E0	66.53187155765221E0
chr3:37272656-37273741	.	.	Intergenic	0.03810715239485096E0	0.9999999999998793E0	2.188983633736039E0	2.188983633736039E0	22.34329648337056E0	10.207155567095873E0	0.20941051331339264E0	0.8565483502551655E0	1.5249353889951394E0	1.5249353889951394E0	22.34329648337056E0	14.651962728790588E0	0.37527407948529795E0	0.8620384897188644E0	0.6966408361822524E0	-1.435459921471477E0	10.207155567095873E0	14.651962728790588E0
chr1:130999866-131000329	.	.	Intergenic	0.03812152281584433E0	0.9999999999998793E0	3.0440317610300265E0	3.0440317610300265E0	14.032021947180459E0	4.609683159952432E0	0.03730479432505547E0	0.4864186570488172E0	46.926755663177126E0	46.926755663177126E0	14.032021947180459E0	0.2990196477228709E0	0.14719599637816244E0	0.8620384897188644E0	15.415987528099329E0	15.415987528099329E0	4.609683159952432E0	0.2990196477228709E0
chr12:69544625-69545558	.	.	Intergenic	0.038197116072461804E0	0.9999999999998793E0	5.026555010094333E0	5.026555010094333E0	9.930353993969053E0	1.97557849740566E0	0.029202935168577023E0	0.42668403432749685E0	11.069901337462795E0	11.069901337462795E0	9.930353993969053E0	0.8970589430966939E0	0.5351867084082199E0	0.875173998899523E0	2.202283933077865E0	2.202283933077865E0	1.97557849740566E0	0.8970589430966939E0
chr19:56509549-56511081	.	.	Intergenic	0.0382148109574462E0	0.9999999999998793E0	3.8609770369120917E0	3.8609770369120917E0	11.441494818864566E0	2.9633677459048484E0	0.023857211131451915E0	0.3797475190177236E0	5.466193518793568E0	5.466193518793568E0	11.441494818864566E0	2.093137533372546E0	0.7001966682462147E0	0.9183162073309322E0	1.4157539572328786E0	1.4157539572328786E0	2.9633677459048484E0	2.093137533372546E0
chr2:25094733-25095984	Noxa1	ENSMUST00000044018.7	TSS	0.03826951762329299E0	0.9999999999998793E0	0.19669128311144737E0	-5.084109393060339E0	1.9428953471819632E0	9.877892484341048E0	0.8096971814488354E0	0.9565603199352659E0	1.2995101576110821E0	1.2995101576110821E0	1.9428953471819632E0	1.4950982382112583E0	0.03143313632343252E0	0.4690187345899443E0	6.606851798687824E0	6.606851798687824E0	9.877892484341048E0	1.4950982382112583E0
chr12:80137083-80138228	.	.	Intergenic	0.03828484635421666E0	0.9999999999998793E0	0.10927293507907901E0	-9.151396906071176E0	0.971447673760854E0	8.890103236065118E0	0.9566117121440477E0	0.9998888456104917E0	1.0829251313267851E0	1.0829251313267851E0	0.971447673760854E0	0.8970589430966934E0	0.038419000011623176E0	0.5201271069595702E0	9.910277696330661E0	9.910277696330661E0	8.890103236065118E0	0.8970589430966934E0
chr5:139323725-139324547	Adap1	ENSMUST00000110865.1	Intron 1	0.03842563509576186E0	0.9999999999998793E0	0.1889125318032742E0	-5.293455073914097E0	1.8349567168009873E0	9.713260942962938E0	0.5785509785784999E0	0.8680136059037894E0	2.0455252477240973E0	2.0455252477240973E0	1.8349567168009873E0	0.8970589430966966E0	0.030874253139730377E0	0.46405715504928413E0	10.827896001384511E0	10.827896001384511E0	9.713260942962938E0	0.8970589430966966E0
chr1:60940277-60941318	.	.	Intergenic	0.038464553775910036E0	0.9999999999998793E0	2.0257521030417416E0	2.0257521030417416E0	26.013209914753705E0	12.841260229074383E0	0.0055101485382769355E0	0.15617347694943454E0	2.9489825606547155E0	2.9489825606547155E0	26.013209914753705E0	8.821079602782868E0	0.39050519725051824E0	0.8620384897188644E0	1.4557470068656029E0	1.4557470068656029E0	12.841260229074383E0	8.821079602782868E0
chr4:32748613-32749231	Mdn1	ENSMUST00000071642.10	CDS Exon 78	0.03850868254728176E0	0.9999999999998793E0	0.273182337639555E0	-3.6605587632075616E0	3.2381589116896694E0	11.85347098084428E0	0.31513524476477606E0	0.8565483502551655E0	3.0940718032858188E0	3.0940718032858188E0	3.2381589116896694E0	1.046568766843366E0	0.01730828530474569E0	0.33425689631121724E0	11.326031653511325E0	11.326031653511325E0	11.85347098084428E0	1.046568766843366E0
chr12:107962867-107968634	Bcl11b	ENSMUST00000066060.10	CDS Exon 3	0.038527858248069174E0	0.9999999999998793E0	1.3521701215526465E0	1.3521701215526465E0	110.63709608342904E0	81.82187604943421E0	0.1163286628097575E0	0.7929872476918103E0	0.8176782760332626E0	-1.2229748903825846E0	110.63709608342904E0	135.3063904548791E0	3.2867217310309014E-4	0.022933281584184763E0	0.6047155332010687E0	-1.6536701061844539E0	81.82187604943421E0	135.3063904548791E0
chr5:77406543-77407583	Igfbp7	ENSMUST00000046746.9	CDS Exon 1	0.038533353826723335E0	0.9999999999998793E0	3.527954758849453E0	3.527954758849453E0	12.197065231299375E0	3.457262370132297E0	0.017048727688175155E0	0.31348308662347235E0	13.596726642281137E0	13.596726642281137E0	12.197065231299375E0	0.8970589430966939E0	0.25487783573465334E0	0.8620384897188644E0	3.853996882521062E0	3.853996882521062E0	3.457262370132297E0	0.8970589430966939E0
chr12:103334193-103337068	Asb2	ENSMUST00000127447.1	TSS	0.038662538405513994E0	0.9999999999998793E0	0.6461903824263541E0	-1.5475315436375585E0	36.91501157809091E0	57.127144850841376E0	4.3210172395470364E-5	0.004624217189302157E0	5.742021625223864E0	5.742021625223864E0	36.91501157809091E0	6.42892242271061E0	1.5142094709640027E-7	5.185470420993646E-5	8.885959589282928E0	8.885959589282928E0	57.127144850841376E0	6.42892242271061E0
[truncated: 106,956 more rows]

## Sheet: H3K4me3
Region.ID	Gene.IDs	Transcript.IDs	Gene.section	P.value..Tet.vs..TFH.	FDR.step.up..Tet.vs..TFH.	Ratio..Tet.vs..TFH.	Fold.change..Tet.vs..TFH.	LSMean.Tet...Tet.vs..TFH.	LSMean.TFH...Tet.vs..TFH.	P.value..Tet.vs..Th0.	FDR.step.up..Tet.vs..Th0.	Ratio..Tet.vs..Th0.	Fold.change..Tet.vs..Th0.	LSMean.Tet...Tet.vs..Th0.	LSMean.Th0...Tet.vs..Th0.	P.value..TFH.vs..Th0.	FDR.step.up..TFH.vs..Th0.	Ratio..TFH.vs..Th0.	Fold.change..TFH.vs..Th0.	LSMean.TFH...TFH.vs..Th0.	LSMean.Th0...TFH.vs..Th0.
[truncated: 32,772 more rows]

[truncated: 1 more sheets: H3K27me3]
