# Supplementary material for: T-follicular helper cells are epigenetically poised to transdifferentiate into T-regulatory type 1 cells
Source: eLife. 2024 Nov 22;13:RP97665. doi: 10.7554/eLife.97665 (PMC11584177; doi:10.7554/eLife.97665)
Supplement: Figure 3—source data 3. — Only genes associated with OCR shared by TFH and TR1 at the single-cell level are included. [file elife-97665-fig3-data3.xlsx]

## Sheet: H3K27Ac
gene	status	fold	DE_sig	c
1110034G24Rik	Deposition only TFH	0		1
1500012K07Rik	No differential deposition	0		1
1600020E01Rik	Deposition only Tet+	0		1
1700020N01Rik	No differential deposition	0		1
1700025M24Rik	No differential deposition	0		1
1700027F09Rik	No differential deposition	0		1
1700057G04Rik	No differential deposition	0		1
1700061F12Rik	No differential deposition	0		1
1700129C05Rik	No differential deposition	0		1
2700097O09Rik	Tet+ & TFH	0		4
4930517O19Rik	No differential deposition	0		1
6430710C18Rik	No differential deposition	0		1
8030474K03Rik	No differential deposition	0		1
A130057D12Rik	No differential deposition	0		1
A330017A19Rik	No differential deposition	0		1
A430093F15Rik	Tet+ & TFH	-0.331877	2.06218	4
A630001G21Rik	No differential deposition	0		1
Abcc4	No differential deposition	0		1
Abr	No differential deposition	0		1
Acot7	Deposition only Tet+	0		1
Acoxl	No differential deposition	0		1
Adap1	Deposition only TFH	0		1
Adat2	No differential deposition	0		1
Adck3	No differential deposition	0		1
Adcy7	No differential deposition	0		1
Adh4	No differential deposition	0		1
Adora2a	Deposition only TFH	0		1
Adprm	Deposition only Tet+	0		1
Aebp2	No differential deposition	0		1
Agfg1	No differential deposition	0		1
Akap11	No differential deposition	0		1
Alcam	No differential deposition	0		1
Alpk2	Tet+ & TFH	-0.240242	12.7243	6
Amd1	No differential deposition	-0.321243	15.4843	1
Amz2	No differential deposition	-0.174627	1.89732	1
Angptl2	Tet+ & TFH	-0.360356	3.39947	4
Ankrd12	Tet+ & TFH	-3.34975	114.567	1
Ankrd46	No differential deposition	0		1
Ankrd54	No differential deposition	0		1
Ankrd55	Tet+ & TFH	-0.270148	21.1747	1
Ankrd6	Tet+ & TFH	-0.183113	12.8863	1
Anxa2	No differential deposition	0		1
Arf6	No differential deposition	0		1
Arhgap15	No differential deposition	30.9662	24.0804	1
Arhgap26	Tet+ & TFH	0		1
Arhgap31	No differential deposition	0.216215	4.14993	1
Arhgef3	Tet+ & TFH	0		2
Arid5b	Deposition only Tet+	-13.8367	93.0304	1
Asap1	Tet+ & TFH	-6.77694	84.9385	4
Ascc1	Tet+ & TFH	0		4
Atf3	No differential deposition	0		1
Atf7ip	No differential deposition	0		1
Atp2b1	No differential deposition	0		1
Atp6v1g3	Tet+ & TFH	0		1
Atp8b5	Deposition only Tet+	0		1
Atxn1	No differential deposition	9.82661	59.4636	1
Atxn7l1	Tet+ & TFH	0		6
AU019990	No differential deposition	0		1
AU020206	No differential deposition	0		1
Auh	No differential deposition	0		1
Aven	Tet+ & TFH	0		1
Axin2	No differential deposition	0		1
Bach2	Tet+ & TFH	17.1435	21.7503	256
Bcl2l15	Tet+ & TFH	-0.0735145	1.98967	1
Bhlhe40	Tet+ & TFH	0		4
Btd	No differential deposition	0		1
Btg1	No differential deposition	-6.04553	14.5452	1
Bub1b	No differential deposition	0		1
C1qtnf6	Tet+ & TFH	0		1
C230024C17Rik	No differential deposition	0		1
C2cd2	Tet+ & TFH	0		1
C9	No differential deposition	0		1
Cacna1s	Tet+ & TFH	0		1
Calcoco1	No differential deposition	0		1
Camk1d	No differential deposition	-0.564362	16.7107	1
Camk2d	No differential deposition	-9.64142	63.3413	1
Car5b	No differential deposition	0		1
Casp3	No differential deposition	0		1
Casp4	No differential deposition	-5.87885	70.5091	1
Cbr4	No differential deposition	0		1
Ccdc67	No differential deposition	0		1
Ccnd3	Deposition only TFH	-0.245348	11.7418	3
Ccr1	No differential deposition	0		1
Ccr5	No differential deposition	0.155281	9.72882	1
Cd200	Deposition only Tet+	0.271389	9.96424	1
Cd40lg	No differential deposition	-3.51583	95.0406	1
Cd44	Tet+ & TFH	-9.71047	129.047	16
Cd47	No differential deposition	0.226746	3.74104	1
Cd52	No differential deposition	-9.17311	2.03487	1
Cd82	Tet+ & TFH	0		16
Cd83	Tet+ & TFH	-0.878512	21.916	4
Cd86	No differential deposition	0		1
Cdk6	Deposition only Tet+	-0.409532	12.956	2
Cdk8	No differential deposition	0		1
Cebpa	Tet+ & TFH	-0.182651	14.8659	1
Celf2	Tet+ & TFH	-3.73723	64.5236	1
Cers4	No differential deposition	-0.583589	39.5532	1
Chn1	No differential deposition	-0.559144	13.4121	1
Chrna1	No differential deposition	0		1
Chst2	No differential deposition	0.0579856	7.05513	1
Cited2	No differential deposition	0		1
Cmah	No differential deposition	0.306782	2.53535	1
Cnot2	No differential deposition	-0.299299	1.56181	1
Commd1	No differential deposition	0		1
Cox7c	No differential deposition	0		1
Cpd	Deposition only Tet+	0		1
Cpm	No differential deposition	-0.449996	10.2974	1
Csf1	No differential deposition	-0.0732305	2.63292	1
Cspg5	No differential deposition	0		1
Csrnp3	No differential deposition	0		1
Ctla4	Tet+ & TFH	0		9
Cubn	No differential deposition	0		1
Cx3cr1	Tet+ & TFH	0		1
Cxcr5	Tet+ & TFH	-0.668374	77.5427	2
D430001F17Rik	No differential deposition	0		1
Dapp1	No differential deposition	0		1
Dars	No differential deposition	0		1
Dcbld2	No differential deposition	0		1
Dclk1	No differential deposition	0		1
Dhrs3	Tet+ & TFH	-0.363028	38.5913	1
Dhx35	No differential deposition	0		1
Dio3	No differential deposition	0		1
Dleu2	Deposition only Tet+	0		1
Dlg2	No differential deposition	0.146231	12.9754	1
Dnajc5b	No differential deposition	0		1
Dock8	No differential deposition	0		1
Dus2	Tet+ & TFH	-0.1035	1.7494	1
Dusp14	No differential deposition	0		1
Dusp4	Deposition only TFH	-0.0817526	2.19669	1
Dynll2	No differential deposition	0		1
E130308A19Rik	Tet+ & TFH	0		1
Ece1	Tet+ & TFH	-0.21071	2.22642	2
Eea1	Tet+ & TFH	-6.83146	12.6652	2
Egln3	Deposition only TFH	-0.28649	15.2372	1
Egr2	No differential deposition	-0.226828	24.3886	1
Egr4	No differential deposition	0		1
Ehbp1l1	Deposition only Tet+	0		1
Elf1	No differential deposition	0		1
Elk3	Deposition only Tet+	0		1
Enpp6	No differential deposition	0		1
Epm2a	No differential deposition	0		1
Eps8l3	No differential deposition	0		1
Ercc6l2	No differential deposition	0		1
Ets1	Tet+ & TFH	-3.36879	4.20811	2
Etv6	No differential deposition	0		1
Ezh2	Tet+ & TFH	0		1
F13a1	No differential deposition	0		1
Fam107b	No differential deposition	0		1
Fam110a	Deposition only TFH	0		1
Fam129a	No differential deposition	0.128454	2.05423	1
Fam43a	No differential deposition	-0.0988121	5.23544	1
Fam53b	No differential deposition	0.0604015	4.70912	1
Fam76b	No differential deposition	0		1
Farp1	Tet+ & TFH	-2.95783	4.24965	2
Fbxw10	Tet+ & TFH	0		1
Fbxw11	No differential deposition	-0.979988	17.8759	1
Fer1l6	No differential deposition	0		1
Fgd6	No differential deposition	0		1
Fhad1	Tet+ & TFH	0		1
Filip1l	No differential deposition	-0.110266	6.62872	1
Fosb	No differential deposition	-8.64043	99.3369	1
Foxp1	Tet+ & TFH	0		120
Fryl	No differential deposition	0		1
Fyn	Tet+ & TFH	-11.7427	122.443	48
Gabpb1	No differential deposition	-3.96761	30.4898	1
Galm	Tet+ & TFH	0		30
Galnt2	Tet+ & TFH	-0.113943	4.48811	1
Gbp6	No differential deposition	0		1
Gdi2	No differential deposition	0		1
Gem	Tet+ & TFH	-0.42121	21.7403	1
Gfod1	No differential deposition	0		1
Gm10113	No differential deposition	0		1
Gm10804	Tet+ & TFH	0		1
Gm11454	Tet+ & TFH	0		1
Gm12148	Tet+ & TFH	0		9
Gm12610	No differential deposition	0		1
Gm13049	No differential deposition	0		1
Gm13218	No differential deposition	0		1
Gm13481	Deposition only Tet+	0		1
Gm13982	No differential deposition	0		1
Gm14005	Tet+ & TFH	0		1
Gm14488	Deposition only TFH	0		1
Gm16998	No differential deposition	0		1
Gm20388	Tet+ & TFH	0		1
Gm20546	No differential deposition	0		1
Gm21060	No differential deposition	0		1
Gm21954	No differential deposition	0		1
Gm24601	No differential deposition	0		1
Gm26486	No differential deposition	0		1
Gm26544	No differential deposition	0		1
Gm26561	No differential deposition	0		1
Gm26612	No differential deposition	0		1
Gm26667	No differential deposition	0		1
Gm26686	Tet+ & TFH	0		1
Gm26917	No differential deposition	-6.82592	2.0554	1
Gm26969	No differential deposition	0		1
Gm27007	No differential deposition	0		1
Gm27162	Deposition only TFH	0		1
Gm27977	No differential deposition	0		1
Gm28053	Tet+ & TFH	0		1
Gm28502	No differential deposition	0		1
Gm28556	No differential deposition	0		1
Gm29094	No differential deposition	0		1
Gm29113	No differential deposition	0		1
Gm29150	No differential deposition	0		1
Gm29296	No differential deposition	0		1
Gm29395	No differential deposition	0		1
Gm3443	No differential deposition	0		1
Gm5148	No differential deposition	0		1
Gm8225	No differential deposition	0		1
Gna13	Tet+ & TFH	-4.76665	154.568	1
Gna14	Deposition only TFH	-0.195722	7.46226	1
Gnaq	Tet+ & TFH	-5.22585	15.9768	1
Gnptab	No differential deposition	-0.100802	3.13738	1
Gphn	No differential deposition	-0.217014	5.20659	1
Gpr15	No differential deposition	0		1
Gpr155	Tet+ & TFH	0		2
Gpr68	Deposition only Tet+	0.191722	1.84661	4
Gpr89	Tet+ & TFH	0		1
Grb2	No differential deposition	-0.408421	1.64327	1
Grhl1	No differential deposition	0		1
Gsx2	No differential deposition	0		1
Gtdc1	No differential deposition	-6.71583	58.3204	1
Gtpbp4	No differential deposition	0		1
Gtsf1l	No differential deposition	0		1
Gucd1	No differential deposition	0		1
Gypc	No differential deposition	0		1
Gzmk	Deposition only TFH	0		1
H2afz	No differential deposition	4.11129	1.33855	1
Hdac4	No differential deposition	0		1
Heg1	No differential deposition	-1.25913	25.8456	1
Hiat1	No differential deposition	0		1
Hif1a	Tet+ & TFH	-6.45511	104.984	1
Hivep1	No differential deposition	0		1
Hivep2	Tet+ & TFH	-19.7552	66.239	10
Hlcs	Tet+ & TFH	0		1
Hmces	No differential deposition	-0.218038	12.7402	1
Hsbp1l1	No differential deposition	0		1
Hsd17b2	No differential deposition	0		1
Hspb7	Deposition only Tet+	0		1
Hvcn1	Deposition only Tet+	0		1
Ica1	Tet+ & TFH	0		2
Ica1l	No differential deposition	0		1
Icos	No differential deposition	0		1
Id2	No differential deposition	2.51887	17.2729	1
Ifitm3	No differential deposition	0		1
Ifng	No differential deposition	0.490039	3.51742	1
Ikzf2	Tet+ & TFH	-5.99361	41.4	9
Ikzf3	Tet+ & TFH	-1.42118	27.9657	2
Il10	Deposition only Tet+	3.72632	27.6138	2
Il1rapl1	No differential deposition	0		1
Il21	No differential deposition	-1.97622	7.49572	1
Il2rb	Tet+ & TFH	0		4
Inpp4b	Deposition only Tet+	1.5571	9.47073	4
Ipmk	No differential deposition	-0.788108	7.7757	1
Iqgap1	Tet+ & TFH	1.01504	6.59048	4
Irf2bp2	No differential deposition	0		1
Ispd	Deposition only TFH	0		1
Itga4	No differential deposition	7.17703	194.968	1
Itgav	No differential deposition	0		1
Itpkb	No differential deposition	-4.14153	28.2786	1
Itpr1	Deposition only Tet+	-1.22524	11.7339	1
Jak2	Tet+ & TFH	0.912841	6.12728	1
Jarid2	Tet+ & TFH	-18.7191	96.3778	4
Jdp2	Deposition only TFH	-0.0757862	5.79397	1
Jmjd1c	Tet+ & TFH	-0.62386	31.0806	1
Kcnip1	No differential deposition	0		1
Kcnk5	Deposition only Tet+	0		2
Kcnma1	No differential deposition	0		1
Kdm2b	Tet+ & TFH	-1.86535	10.9182	1
Kdm7a	No differential deposition	0		1
Kif13a	Tet+ & TFH	-0.12446	3.70582	1
Kif20b	No differential deposition	0		1
Kmt2a	No differential deposition	0		1
Ksr1	Tet+ & TFH	-0.709189	27.2989	12
Ksr2	No differential deposition	0		1
Lag3	Tet+ & TFH	0		4
Lars2	No differential deposition	0		1
Ldlrad4	No differential deposition	-6.81083	27.3684	1
Lmnb1	Tet+ & TFH	0		2
Lnx2	Tet+ & TFH	-1.49299	53.9489	4
Lonrf2	No differential deposition	0		1
Lpin1	No differential deposition	0		1
Lrig1	Tet+ & TFH	-1.36824	35.1551	2
Lrrc8d	Deposition only TFH	-0.153215	2.52298	1
Lsm4	No differential deposition	0		1
Maf	Tet+ & TFH	-5.16487	29.576	1
Mafg	Tet+ & TFH	-0.0917367	5.16578	2
Malt1	No differential deposition	-20.5667	169.355	1
Maml2	No differential deposition	0		1
Map2k3	Tet+ & TFH	-0.160708	9.11649	1
Map3k7	No differential deposition	0		1
Mapre2	Tet+ & TFH	-9.11775	25.8149	9
Matn2	Tet+ & TFH	0		1
Max	No differential deposition	-0.227586	16.2738	1
Mbnl1	No differential deposition	0		1
Mchr1	No differential deposition	0		1
Mcoln2	Deposition only Tet+	0		1
Mcoln3	No differential deposition	0		1
Mcu	Deposition only Tet+	0		2
Mdfic	Tet+ & TFH	0		2
Mdm1	No differential deposition	0		1
Mfap5	No differential deposition	0		1
Mfhas1	No differential deposition	0		1
Mlf1	No differential deposition	0		1
Mllt3	Deposition only Tet+	0		1
Mmd	No differential deposition	-0.19953	3.51742	1
Mmp10	No differential deposition	0		1
Mphosph6	No differential deposition	0		1
Mpp2	Tet+ & TFH	0		1
Msi2	Tet+ & TFH	-1.36471	35.3762	9
Mstn	No differential deposition	0		1
Mybpc1	No differential deposition	0		1
Myo1d	Tet+ & TFH	-0.15784	16.1121	2
Myo1e	Tet+ & TFH	0		4
Myo3b	Deposition only Tet+	0.239686	13.4131	1
n-R5-8s1	No differential deposition	0		1
N4bp1	Tet+ & TFH	0		1
Nampt	No differential deposition	-1.86518	27.2866	1
Ncoa2	No differential deposition	0		1
Ndufaf6	No differential deposition	0		1
Neb	No differential deposition	0.543033	15.3949	1
Neil2	Tet+ & TFH	0		4
Nek6	No differential deposition	0		1
Nek7	Tet+ & TFH	-7.16181	13.5092	6
Nf2	Tet+ & TFH	0		1
Nfatc1	Tet+ & TFH	-1.71932	24.3092	77
Nfia	Tet+ & TFH	-11.3534	93.8914	6
Nfil3	Deposition only Tet+	0		1
Nfkb1	Deposition only Tet+	-37.9458	39.0817	1
Nfkbil1	No differential deposition	0		1
Nfkbiz	Tet+ & TFH	-9.06514	110.571	1
Ngly1	No differential deposition	0		1
Nlrc5	No differential deposition	0		1
Nod2	Deposition only TFH	0		2
Nol10	Tet+ & TFH	-0.401045	23.2566	15
Nop58	No differential deposition	0		1
Npas2	No differential deposition	0		1
Nr3c2	No differential deposition	0		1
Nrip1	No differential deposition	-2.14695	34.6342	1
Nrn1	Deposition only Tet+	1.38885	46.2264	1
Nrp1	Deposition only Tet+	0		1
Nt5e	Tet+ & TFH	0		1
Odc1	No differential deposition	-3.76592	27.7914	1
Osbpl3	Tet+ & TFH	-0.631822	42.2777	3
Osbpl8	Deposition only Tet+	-6.58315	41.8771	1
Ostf1	No differential deposition	0		1
Pbx3	Tet+ & TFH	-8.07618	44.0412	1
Pcyox1l	No differential deposition	0		1
Pdcd1	Tet+ & TFH	-1.40536	90.184	9
Pde4b	Deposition only TFH	0		3
Pdhx	No differential deposition	0		1
Peak1	Tet+ & TFH	-0.865289	20.6479	1
Pear1	No differential deposition	-0.138703	8.43799	1
Pgap1	No differential deposition	0		1
Phactr2	Tet+ & TFH	-9.06827	63.0959	3
Pip4k2a	Tet+ & TFH	0		1
Pipox	No differential deposition	-0.0620078	6.21679	1
Pkdcc	No differential deposition	0		1
Plagl1	Tet+ & TFH	-6.59745	14.7657	1
Plcb4	Tet+ & TFH	-3.59096	60.7126	1
Plcl2	No differential deposition	-0.614879	2.89488	1
Plekhm2	No differential deposition	0		1
Plxnc1	Tet+ & TFH	0		1
Pm20d1	No differential deposition	0		1
Polk	Tet+ & TFH	0		1
Pou2af1	No differential deposition	-0.497861	53.7629	1
Pou2f2	Tet+ & TFH	0.328751	23.063	2
Ppp1r16b	Deposition only Tet+	-3.78795	56.9122	1
Ppp2r5c	Deposition only Tet+	0		1
Ppp4r4	No differential deposition	0		1
Prkca	Tet+ & TFH	-33.6976	85.7482	35
Prkch	Tet+ & TFH	-9.14679	26.1594	8
Prkg1	No differential deposition	0		1
Prr13	No differential deposition	0		1
Prrc2b	Tet+ & TFH	0		1
Prune2	No differential deposition	0		1
Psma6	Deposition only Tet+	0		1
Ptger2	No differential deposition	-0.210712	7.26966	1
Ptger4	No differential deposition	-1.51839	1.86273	1
Ptk2b	Deposition only Tet+	-1.49088	14.8146	1
Ptplad1	No differential deposition	0		1
Ptpn11	Tet+ & TFH	-0.401142	10.7659	1
Ptpn13	Tet+ & TFH	-13.099	67.4315	4
Ptpn22	Tet+ & TFH	3.20991	81.9305	6
Ptpn5	Tet+ & TFH	-0.473665	8.81543	1
Rab11fip1	No differential deposition	0		1
Rab8b	Tet+ & TFH	-7.55579	11.103	2
Rabgef1	Tet+ & TFH	-0.17477	7.53618	1
Rad51b	Tet+ & TFH	0		2
Raet1e	No differential deposition	-6.64171	23.561	1
Raf1	No differential deposition	-7.75111	63.6267	1
Ralgps1	Tet+ & TFH	-0.191935	7.56048	6
Rap1b	No differential deposition	-0.948005	13.7762	1
Rapgef1	Tet+ & TFH	-1.22136	53.3615	12
Rasl11a	No differential deposition	0		1
Rbm20	Tet+ & TFH	0		1
Rbpj	No differential deposition	0		1
Rcl1	No differential deposition	0		1
Reps1	No differential deposition	-0.375097	2.04113	1
Rgs16	Tet+ & TFH	-2.22163	31.6434	1
Rgs8	No differential deposition	0		1
Rnf157	No differential deposition	-0.309763	7.31138	1
Rnf19a	No differential deposition	-0.58016	25.5113	1
Rnf216	No differential deposition	-0.176432	4.18166	1
Rora	Deposition only TFH	1.97751	48.6999	1
RP23-132G24.2	No differential deposition	0		1
RP23-242C19.8	No differential deposition	0		1
RP23-415L22.2	No differential deposition	0		1
RP24-559D1.1	No differential deposition	0		1
RP24-68C1.3	No differential deposition	0		1
RP24-92E18.1	No differential deposition	0		1
RP24-92E18.2	No differential deposition	0		1
Rpa2	No differential deposition	0		1
Rpl7a-ps3	No differential deposition	0		1
Rplp1	No differential deposition	0		1
Rps29	No differential deposition	0		1
Rps6ka1	No differential deposition	0		1
Rreb1	No differential deposition	0		1
Rtkn2	No differential deposition	0		1
Rtn3	No differential deposition	0		1
Runx2	Tet+ & TFH	1.9908	36.4706	1
S100a10	No differential deposition	3.73627	92.2648	1
Samd12	No differential deposition	0		1
Samd9l	No differential deposition	0		1
Scaf4	No differential deposition	0		1
Scfd2	Deposition only Tet+	0		1
Sdcbp2	No differential deposition	0		1
Sdf4	Deposition only Tet+	0		1
Secisbp2l	No differential deposition	0		1
Serpina12	No differential deposition	0		1
Setbp1	No differential deposition	-4.40693	25.861	1
Sgms1	No differential deposition	0		1
Sh3kbp1	No differential deposition	-1.67097	53.8056	1
Sik3	Tet+ & TFH	-4.03708	51.0173	1
Sipa1l2	No differential deposition	0		1
Slamf6	No differential deposition	3.59855	36.3101	1
Slc12a8	No differential deposition	0		1
Slc19a3	No differential deposition	0		1
Slc1a4	No differential deposition	0		1
Slc22a15	Tet+ & TFH	-0.735974	8.04119	9
Slc25a12	Deposition only Tet+	0		1
Slc25a19	No differential deposition	0		1
Slc36a3	Tet+ & TFH	-0.154208	4.4786	2
Slc38a1	Tet+ & TFH	-3.23794	102.001	1
Slc7a1	Tet+ & TFH	-0.588291	27.9689	1
Slc9a9	No differential deposition	-28.6596	Inf	1
Slc9b2	No differential deposition	0		1
Slco3a1	No differential deposition	-2.1716	73.2412	1
Smad3	No differential deposition	-0.384861	27.8146	1
Smco4	Tet+ & TFH	-0.547421	46.371	63
Smyd3	No differential deposition	-0.0922989	44.2287	1
Sntb1	Deposition only Tet+	-5.76336	54.9246	1
Socs3	No differential deposition	0		1
Socs5	No differential deposition	0		1
Sorl1	No differential deposition	0		1
Sp4	No differential deposition	0		1
Spcs2	No differential deposition	0		1
Specc1l	Tet+ & TFH	0		2
Spry1	No differential deposition	-0.324134	6.63117	1
Spty2d1	No differential deposition	0		1
Sspn	No differential deposition	0		1
Sspo	No differential deposition	0		1
St6gal1	Tet+ & TFH	-5.6772	20.4852	3
Stard13	No differential deposition	0		1
Stat3	No differential deposition	-12.713	34.7391	1
Stat4	Tet+ & TFH	-0.81899	60.7951	2
Stim1	No differential deposition	-1.64125	49.4587	1
Stim2	No differential deposition	-1.01509	20.9254	1
Stk32c	No differential deposition	0		1
Stk39	Tet+ & TFH	-7.58476	125.242	1
Stx11	Tet+ & TFH	-5.34144	56.7613	4
Stx6	Deposition only Tet+	0		1
Susd1	Tet+ & TFH	0		16
Synpo	Tet+ & TFH	0		1
Tank	Tet+ & TFH	-9.37227	100.255	1
Tatdn1	Tet+ & TFH	0		1
Tbc1d31	No differential deposition	-0.0866336	3.17146	1
Tbc1d4	Tet+ & TFH	-1.76956	38.8883	2
Tbl1xr1	No differential deposition	-0.888247	25.0478	1
Tbx21	No differential deposition	0.175484	6.33607	1
Tead1	No differential deposition	0		1
Tfap2a	No differential deposition	0		1
Tg	No differential deposition	0		1
Tgfb1	No differential deposition	-0.165797	4.61023	1
Tiam1	Tet+ & TFH	0		2
Tigit	Tet+ & TFH	-0.243755	26.8791	9
Tjp2	Tet+ & TFH	-0.347775	3.94261	1
Tm2d1	No differential deposition	0		1
Tmed1	No differential deposition	0		1
Tmem192	No differential deposition	0		1
Tmem2	Deposition only Tet+	0		1
Tmem26	No differential deposition	0		1
Tmem65	No differential deposition	0		1
Tmprss13	No differential deposition	0		1
Tmprss6	No differential deposition	0		1
Tnc	No differential deposition	-0.213008	20.569	1
Tnfaip8	Tet+ & TFH	-7.45474	73.4234	30
Tnfrsf8	Tet+ & TFH	-0.144315	8.39715	1
Tnfsf4	No differential deposition	0		1
Tnfsf8	Deposition only Tet+	-38.0782	2.28067	2
Tnfsf9	No differential deposition	0		1
Tnip3	Deposition only Tet+	0.099803	2.9263	1
Tnr	No differential deposition	0		1
Tnrc6a	Deposition only TFH	0		1
Tomm20	No differential deposition	0		1
Tox	Tet+ & TFH	-45.2428	260.399	2
Tox2	Deposition only TFH	-5.87803	181.237	3
Tprg	No differential deposition	0		1
Trerf1	No differential deposition	-11.5314	161.695	1
Trib1	Tet+ & TFH	-0.365856	25.2065	4
Trp53inp1	No differential deposition	-1.14645	12.2874	1
Trpm6	No differential deposition	-0.219774	7.7484	1
Trps1	No differential deposition	-3.53868	8.94877	1
Tsen2	Tet+ & TFH	0		1
Tspan14	No differential deposition	-0.259728	6.54601	1
Ttc39b	Deposition only Tet+	1.09272	12.7431	2
Ttc39c	Tet+ & TFH	-0.137555	9.35214	1
Ttyh1	No differential deposition	0		1
Txndc16	No differential deposition	0		1
Ube2e3	No differential deposition	0		1
Ube2z	No differential deposition	0		1
Ubl3	No differential deposition	-1.17453	22.6248	1
Ubr2	Tet+ & TFH	-0.156286	1.68093	1
Ugp2	No differential deposition	0		1
Usp6nl	Tet+ & TFH	-0.926822	35.526	1
Utrn	No differential deposition	-8.76078	110.175	1
Vangl2	No differential deposition	0		1
Vcpkmt	No differential deposition	0		1
Vdac1	No differential deposition	0		1
Vmp1	Tet+ & TFH	0		4
Vps13d	Tet+ & TFH	0		1
Wisp1	Deposition only Tet+	0		1
Wwox	Tet+ & TFH	-1.20617	16.7237	99
Xkr6	Tet+ & TFH	0		1
Yam1	No differential deposition	0		1
Ythdc1	No differential deposition	-2.31941	15.6928	1
Zan	Tet+ & TFH	0		1
Zap70	Deposition only Tet+	-0.728081	21.4267	1
Zbtb1	No differential deposition	0		1
Zbtb32	Deposition only Tet+	0.126554	23.5812	2
Zc3h12d	No differential deposition	0.112072	2.03854	1
Zc3h7a	No differential deposition	0		1
Zfp41	No differential deposition	0		1
Zfp831	No differential deposition	-0.586318	12.3752	1

## Sheet: H3K4me3
gene	status	fold	DE_sig	c
1110034G24Rik	No differential deposition	0		1
1500012K07Rik	No differential deposition	0		1
1600020E01Rik	No differential deposition	0		1
1700020N01Rik	No differential deposition	0		1
1700025M24Rik	No differential deposition	0		1
1700027F09Rik	No differential deposition	0		1
1700057G04Rik	No differential deposition	0		1
1700061F12Rik	No differential deposition	0		1
1700129C05Rik	No differential deposition	0		1
2700097O09Rik	No differential deposition	0		1
4930517O19Rik	No differential deposition	0		1
6430710C18Rik	No differential deposition	0		1
8030474K03Rik	No differential deposition	0		1
A130057D12Rik	No differential deposition	0		1
A330017A19Rik	No differential deposition	0		1
A430093F15Rik	No differential deposition	-0.331877	2.06218	1
A630001G21Rik	No differential deposition	0		1
Abcc4	No differential deposition	0		1
Abr	Tet+ & TFH	0		2
Acot7	No differential deposition	0		1
Acoxl	No differential deposition	0		1
Adap1	Deposition only TFH	0		1
Adat2	No differential deposition	0		1
Adck3	No differential deposition	0		1
Adcy7	No differential deposition	0		1
Adh4	No differential deposition	0		1
Adora2a	No differential deposition	0		1
Adprm	No differential deposition	0		1
Aebp2	No differential deposition	0		1
Agfg1	No differential deposition	0		1
Akap11	No differential deposition	0		1
Alcam	Deposition only Tet+	0		1
Alpk2	No differential deposition	-0.240242	12.7243	1
Amd1	No differential deposition	-0.321243	15.4843	1
Amz2	No differential deposition	-0.174627	1.89732	1
Angptl2	Tet+ & TFH	-0.360356	3.39947	2
Ankrd12	No differential deposition	-3.34975	114.567	1
Ankrd46	No differential deposition	0		1
Ankrd54	No differential deposition	0		1
Ankrd55	No differential deposition	-0.270148	21.1747	1
Ankrd6	No differential deposition	-0.183113	12.8863	1
Anxa2	No differential deposition	0		1
Arf6	No differential deposition	0		1
Arhgap15	No differential deposition	30.9662	24.0804	1
Arhgap26	No differential deposition	0		1
Arhgap31	No differential deposition	0.216215	4.14993	1
Arhgef3	No differential deposition	0		1
Arid5b	No differential deposition	-13.8367	93.0304	1
Asap1	Deposition only Tet+	-6.77694	84.9385	1
Ascc1	No differential deposition	0		1
Atf3	No differential deposition	0		1
Atf7ip	No differential deposition	0		1
Atp2b1	No differential deposition	0		1
Atp6v1g3	No differential deposition	0		1
Atp8b5	No differential deposition	0		1
Atxn1	No differential deposition	9.82661	59.4636	1
Atxn7l1	No differential deposition	0		1
AU019990	No differential deposition	0		1
AU020206	No differential deposition	0		1
Auh	No differential deposition	0		1
Aven	No differential deposition	0		1
Axin2	No differential deposition	0		1
Bach2	Tet+ & TFH	17.1435	21.7503	1
Bcl2l15	No differential deposition	-0.0735145	1.98967	1
Bhlhe40	Tet+ & TFH	0		1
Btd	No differential deposition	0		1
Btg1	No differential deposition	-6.04553	14.5452	1
Bub1b	No differential deposition	0		1
C1qtnf6	No differential deposition	0		1
C230024C17Rik	No differential deposition	0		1
C2cd2	No differential deposition	0		1
C9	No differential deposition	0		1
Cacna1s	No differential deposition	0		1
Calcoco1	No differential deposition	0		1
Camk1d	No differential deposition	-0.564362	16.7107	1
Camk2d	No differential deposition	-9.64142	63.3413	1
Car5b	No differential deposition	0		1
Casp3	No differential deposition	0		1
Casp4	No differential deposition	-5.87885	70.5091	1
Cbr4	No differential deposition	0		1
Ccdc67	No differential deposition	0		1
Ccnd3	Deposition only TFH	-0.245348	11.7418	1
Ccr1	No differential deposition	0		1
Ccr5	No differential deposition	0.155281	9.72882	1
Cd200	No differential deposition	0.271389	9.96424	1
Cd40lg	No differential deposition	-3.51583	95.0406	1
Cd44	Tet+ & TFH	-9.71047	129.047	1
Cd47	No differential deposition	0.226746	3.74104	1
Cd52	Deposition only TFH	-9.17311	2.03487	1
Cd82	No differential deposition	0		1
Cd83	Tet+ & TFH	-0.878512	21.916	4
Cd86	No differential deposition	0		1
Cdk6	No differential deposition	-0.409532	12.956	1
Cdk8	No differential deposition	0		1
Cebpa	Tet+ & TFH	-0.182651	14.8659	4
Celf2	No differential deposition	-3.73723	64.5236	1
Cers4	No differential deposition	-0.583589	39.5532	1
Chn1	Deposition only TFH	-0.559144	13.4121	1
Chrna1	No differential deposition	0		1
Chst2	No differential deposition	0.0579856	7.05513	1
Cited2	No differential deposition	0		1
Cmah	Deposition only TFH	0.306782	2.53535	2
Cnot2	No differential deposition	-0.299299	1.56181	1
Commd1	No differential deposition	0		1
Cox7c	No differential deposition	0		1
Cpd	No differential deposition	0		1
Cpm	No differential deposition	-0.449996	10.2974	1
Csf1	No differential deposition	-0.0732305	2.63292	1
Cspg5	No differential deposition	0		1
Csrnp3	No differential deposition	0		1
Ctla4	Tet+ & TFH	0		1
Cubn	No differential deposition	0		1
Cx3cr1	No differential deposition	0		1
Cxcr5	Tet+ & TFH	-0.668374	77.5427	1
D430001F17Rik	No differential deposition	0		1
Dapp1	No differential deposition	0		1
Dars	No differential deposition	0		1
Dcbld2	No differential deposition	0		1
Dclk1	No differential deposition	0		1
Dhrs3	Tet+ & TFH	-0.363028	38.5913	1
Dhx35	No differential deposition	0		1
Dio3	No differential deposition	0		1
Dleu2	No differential deposition	0		1
Dlg2	No differential deposition	0.146231	12.9754	1
Dnajc5b	No differential deposition	0		1
Dock8	No differential deposition	0		1
Dus2	No differential deposition	-0.1035	1.7494	1
Dusp14	No differential deposition	0		1
Dusp4	Tet+ & TFH	-0.0817526	2.19669	4
Dynll2	No differential deposition	0		1
E130308A19Rik	No differential deposition	0		1
Ece1	No differential deposition	-0.21071	2.22642	1
Eea1	No differential deposition	-6.83146	12.6652	1
Egln3	No differential deposition	-0.28649	15.2372	1
Egr2	Deposition only TFH	-0.226828	24.3886	1
Egr4	Deposition only Tet+	0		1
Ehbp1l1	No differential deposition	0		1
Elf1	No differential deposition	0		1
Elk3	No differential deposition	0		1
Enpp6	No differential deposition	0		1
Epm2a	No differential deposition	0		1
Eps8l3	No differential deposition	0		1
Ercc6l2	No differential deposition	0		1
Ets1	Deposition only TFH	-3.36879	4.20811	1
Etv6	No differential deposition	0		1
Ezh2	No differential deposition	0		1
F13a1	No differential deposition	0		1
Fam107b	No differential deposition	0		1
Fam110a	No differential deposition	0		1
Fam129a	Deposition only Tet+	0.128454	2.05423	1
Fam43a	Tet+ & TFH	-0.0988121	5.23544	4
Fam53b	No differential deposition	0.0604015	4.70912	1
Fam76b	No differential deposition	0		1
Farp1	Tet+ & TFH	-2.95783	4.24965	1
Fbxw10	No differential deposition	0		1
Fbxw11	No differential deposition	-0.979988	17.8759	1
Fer1l6	No differential deposition	0		1
Fgd6	No differential deposition	0		1
Fhad1	No differential deposition	0		1
Filip1l	No differential deposition	-0.110266	6.62872	1
Fosb	No differential deposition	-8.64043	99.3369	1
Foxp1	Tet+ & TFH	0		1
Fryl	No differential deposition	0		1
Fyn	No differential deposition	-11.7427	122.443	1
Gabpb1	No differential deposition	-3.96761	30.4898	1
Galm	No differential deposition	0		1
Galnt2	No differential deposition	-0.113943	4.48811	1
Gbp6	No differential deposition	0		1
Gdi2	No differential deposition	0		1
Gem	Tet+ & TFH	-0.42121	21.7403	1
Gfod1	No differential deposition	0		1
Gm10113	No differential deposition	0		1
Gm10804	No differential deposition	0		1
Gm11454	No differential deposition	0		1
Gm12148	No differential deposition	0		1
Gm12610	No differential deposition	0		1
Gm13049	No differential deposition	0		1
Gm13218	No differential deposition	0		1
Gm13481	No differential deposition	0		1
Gm13982	No differential deposition	0		1
Gm14005	Tet+ & TFH	0		1
Gm14488	No differential deposition	0		1
Gm16998	No differential deposition	0		1
Gm20388	No differential deposition	0		1
Gm20546	No differential deposition	0		1
Gm21060	No differential deposition	0		1
Gm21954	No differential deposition	0		1
Gm24601	No differential deposition	0		1
Gm26486	No differential deposition	0		1
Gm26544	No differential deposition	0		1
Gm26561	No differential deposition	0		1
Gm26612	No differential deposition	0		1
Gm26667	No differential deposition	0		1
Gm26686	No differential deposition	0		1
Gm26917	No differential deposition	-6.82592	2.0554	1
Gm26969	No differential deposition	0		1
Gm27007	No differential deposition	0		1
Gm27162	No differential deposition	0		1
Gm27977	No differential deposition	0		1
Gm28053	No differential deposition	0		1
Gm28502	No differential deposition	0		1
Gm28556	No differential deposition	0		1
Gm29094	No differential deposition	0		1
Gm29113	No differential deposition	0		1
Gm29150	No differential deposition	0		1
Gm29296	No differential deposition	0		1
Gm29395	No differential deposition	0		1
Gm3443	No differential deposition	0		1
Gm5148	No differential deposition	0		1
Gm8225	No differential deposition	0		1
Gna13	Deposition only Tet+	-4.76665	154.568	1
Gna14	Tet+ & TFH	-0.195722	7.46226	1
Gnaq	Deposition only TFH	-5.22585	15.9768	1
Gnptab	No differential deposition	-0.100802	3.13738	1
Gphn	No differential deposition	-0.217014	5.20659	1
Gpr15	No differential deposition	0		1
Gpr155	No differential deposition	0		1
Gpr68	Tet+ & TFH	0.191722	1.84661	1
Gpr89	No differential deposition	0		1
Grb2	No differential deposition	-0.408421	1.64327	1
Grhl1	No differential deposition	0		1
Gsx2	No differential deposition	0		1
Gtdc1	No differential deposition	-6.71583	58.3204	1
Gtpbp4	No differential deposition	0		1
Gtsf1l	No differential deposition	0		1
Gucd1	No differential deposition	0		1
Gypc	No differential deposition	0		1
Gzmk	No differential deposition	0		1
H2afz	No differential deposition	4.11129	1.33855	1
Hdac4	No differential deposition	0		1
Heg1	No differential deposition	-1.25913	25.8456	1
Hiat1	No differential deposition	0		1
Hif1a	No differential deposition	-6.45511	104.984	1
Hivep1	No differential deposition	0		1
Hivep2	No differential deposition	-19.7552	66.239	1
Hlcs	No differential deposition	0		1
Hmces	No differential deposition	-0.218038	12.7402	1
Hsbp1l1	No differential deposition	0		1
Hsd17b2	No differential deposition	0		1
Hspb7	No differential deposition	0		1
Hvcn1	No differential deposition	0		1
Ica1	No differential deposition	0		1
Ica1l	Tet+ & TFH	0		1
Icos	Tet+ & TFH	0		1
Id2	No differential deposition	2.51887	17.2729	1
Ifitm3	No differential deposition	0		1
Ifng	No differential deposition	0.490039	3.51742	1
Ikzf2	Deposition only TFH	-5.99361	41.4	1
Ikzf3	No differential deposition	-1.42118	27.9657	1
Il10	No differential deposition	3.72632	27.6138	1
Il1rapl1	No differential deposition	0		1
Il21	No differential deposition	-1.97622	7.49572	1
Il2rb	Tet+ & TFH	0		1
Inpp4b	No differential deposition	1.5571	9.47073	1
Ipmk	No differential deposition	-0.788108	7.7757	1
Iqgap1	No differential deposition	1.01504	6.59048	1
Irf2bp2	No differential deposition	0		1
Ispd	Deposition only TFH	0		1
Itga4	No differential deposition	7.17703	194.968	1
Itgav	No differential deposition	0		1
Itpkb	No differential deposition	-4.14153	28.2786	1
Itpr1	No differential deposition	-1.22524	11.7339	1
Jak2	No differential deposition	0.912841	6.12728	1
Jarid2	No differential deposition	-18.7191	96.3778	1
Jdp2	Tet+ & TFH	-0.0757862	5.79397	1
Jmjd1c	No differential deposition	-0.62386	31.0806	1
Kcnip1	No differential deposition	0		1
Kcnk5	No differential deposition	0		1
Kcnma1	No differential deposition	0		1
Kdm2b	No differential deposition	-1.86535	10.9182	1
Kdm7a	No differential deposition	0		1
Kif13a	Tet+ & TFH	-0.12446	3.70582	1
Kif20b	No differential deposition	0		1
Kmt2a	No differential deposition	0		1
Ksr1	No differential deposition	-0.709189	27.2989	1
Ksr2	Deposition only TFH	0		1
Lag3	No differential deposition	0		1
Lars2	No differential deposition	0		1
Ldlrad4	No differential deposition	-6.81083	27.3684	1
Lmnb1	No differential deposition	0		1
Lnx2	No differential deposition	-1.49299	53.9489	1
Lonrf2	No differential deposition	0		1
Lpin1	No differential deposition	0		1
Lrig1	Deposition only TFH	-1.36824	35.1551	1
Lrrc8d	No differential deposition	-0.153215	2.52298	1
Lsm4	No differential deposition	0		1
Maf	Tet+ & TFH	-5.16487	29.576	1
Mafg	Deposition only TFH	-0.0917367	5.16578	1
Malt1	Deposition only TFH	-20.5667	169.355	1
Maml2	No differential deposition	0		1
Map2k3	No differential deposition	-0.160708	9.11649	1
Map3k7	No differential deposition	0		1
Mapre2	No differential deposition	-9.11775	25.8149	1
Matn2	No differential deposition	0		1
Max	No differential deposition	-0.227586	16.2738	1
Mbnl1	No differential deposition	0		1
Mchr1	No differential deposition	0		1
Mcoln2	No differential deposition	0		1
Mcoln3	No differential deposition	0		1
Mcu	No differential deposition	0		1
Mdfic	Tet+ & TFH	0		1
Mdm1	No differential deposition	0		1
Mfap5	No differential deposition	0		1
Mfhas1	No differential deposition	0		1
Mlf1	No differential deposition	0		1
Mllt3	No differential deposition	0		1
Mmd	No differential deposition	-0.19953	3.51742	1
Mmp10	No differential deposition	0		1
Mphosph6	No differential deposition	0		1
Mpp2	Tet+ & TFH	0		1
Msi2	No differential deposition	-1.36471	35.3762	1
Mstn	No differential deposition	0		1
Mybpc1	No differential deposition	0		1
Myo1d	No differential deposition	-0.15784	16.1121	1
Myo1e	Tet+ & TFH	0		4
Myo3b	No differential deposition	0.239686	13.4131	1
n-R5-8s1	No differential deposition	0		1
N4bp1	No differential deposition	0		1
Nampt	No differential deposition	-1.86518	27.2866	1
Ncoa2	No differential deposition	0		1
Ndufaf6	No differential deposition	0		1
Neb	No differential deposition	0.543033	15.3949	1
Neil2	No differential deposition	0		1
Nek6	Deposition only TFH	0		1
Nek7	No differential deposition	-7.16181	13.5092	1
Nf2	No differential deposition	0		1
Nfatc1	Tet+ & TFH	-1.71932	24.3092	4
Nfia	Deposition only TFH	-11.3534	93.8914	1
Nfil3	No differential deposition	0		1
Nfkb1	No differential deposition	-37.9458	39.0817	1
Nfkbil1	No differential deposition	0		1
Nfkbiz	No differential deposition	-9.06514	110.571	1
Ngly1	No differential deposition	0		1
Nlrc5	No differential deposition	0		1
Nod2	No differential deposition	0		1
Nol10	No differential deposition	-0.401045	23.2566	1
Nop58	No differential deposition	0		1
Npas2	No differential deposition	0		1
Nr3c2	Tet+ & TFH	0		1
Nrip1	No differential deposition	-2.14695	34.6342	1
Nrn1	No differential deposition	1.38885	46.2264	1
Nrp1	Tet+ & TFH	0		1
Nt5e	Tet+ & TFH	0		4
Odc1	No differential deposition	-3.76592	27.7914	1
Osbpl3	Tet+ & TFH	-0.631822	42.2777	1
Osbpl8	No differential deposition	-6.58315	41.8771	1
Ostf1	No differential deposition	0		1
Pbx3	No differential deposition	-8.07618	44.0412	1
Pcyox1l	No differential deposition	0		1
Pdcd1	Tet+ & TFH	-1.40536	90.184	6
Pde4b	No differential deposition	0		1
Pdhx	No differential deposition	0		1
Peak1	No differential deposition	-0.865289	20.6479	1
Pear1	Deposition only TFH	-0.138703	8.43799	1
Pgap1	No differential deposition	0		1
Phactr2	No differential deposition	-9.06827	63.0959	1
Pip4k2a	No differential deposition	0		1
Pipox	No differential deposition	-0.0620078	6.21679	1
Pkdcc	Tet+ & TFH	0		1
Plagl1	No differential deposition	-6.59745	14.7657	1
Plcb4	Deposition only TFH	-3.59096	60.7126	1
Plcl2	No differential deposition	-0.614879	2.89488	1
Plekhm2	No differential deposition	0		1
Plxnc1	Tet+ & TFH	0		1
Pm20d1	No differential deposition	0		1
Polk	No differential deposition	0		1
Pou2af1	No differential deposition	-0.497861	53.7629	1
Pou2f2	No differential deposition	0.328751	23.063	1
Ppp1r16b	No differential deposition	-3.78795	56.9122	1
Ppp2r5c	No differential deposition	0		1
Ppp4r4	No differential deposition	0		1
Prkca	No differential deposition	-33.6976	85.7482	1
Prkch	No differential deposition	-9.14679	26.1594	1
Prkg1	No differential deposition	0		1
Prr13	Deposition only TFH	0		1
Prrc2b	No differential deposition	0		1
Prune2	No differential deposition	0		1
Psma6	No differential deposition	0		1
Ptger2	No differential deposition	-0.210712	7.26966	1
Ptger4	No differential deposition	-1.51839	1.86273	1
Ptk2b	No differential deposition	-1.49088	14.8146	1
Ptplad1	No differential deposition	0		1
Ptpn11	Deposition only Tet+	-0.401142	10.7659	1
Ptpn13	Tet+ & TFH	-13.099	67.4315	1
Ptpn22	No differential deposition	3.20991	81.9305	1
Ptpn5	No differential deposition	-0.473665	8.81543	1
Rab11fip1	No differential deposition	0		1
Rab8b	No differential deposition	-7.55579	11.103	1
Rabgef1	No differential deposition	-0.17477	7.53618	1
Rad51b	No differential deposition	0		1
Raet1e	No differential deposition	-6.64171	23.561	1
Raf1	No differential deposition	-7.75111	63.6267	1
Ralgps1	No differential deposition	-0.191935	7.56048	1
Rap1b	No differential deposition	-0.948005	13.7762	1
Rapgef1	No differential deposition	-1.22136	53.3615	1
Rasl11a	Tet+ & TFH	0		1
Rbm20	No differential deposition	0		1
Rbpj	No differential deposition	0		1
Rcl1	No differential deposition	0		1
Reps1	No differential deposition	-0.375097	2.04113	1
Rgs16	Tet+ & TFH	-2.22163	31.6434	4
Rgs8	No differential deposition	0		1
Rnf157	No differential deposition	-0.309763	7.31138	1
Rnf19a	No differential deposition	-0.58016	25.5113	1
Rnf216	Tet+ & TFH	-0.176432	4.18166	1
Rora	Deposition only TFH	1.97751	48.6999	1
RP23-132G24.2	No differential deposition	0		1
RP23-242C19.8	No differential deposition	0		1
RP23-415L22.2	No differential deposition	0		1
RP24-559D1.1	No differential deposition	0		1
RP24-68C1.3	No differential deposition	0		1
RP24-92E18.1	No differential deposition	0		1
RP24-92E18.2	No differential deposition	0		1
Rpa2	No differential deposition	0		1
Rpl7a-ps3	No differential deposition	0		1
Rplp1	No differential deposition	0		1
Rps29	No differential deposition	0		1
Rps6ka1	No differential deposition	0		1
Rreb1	No differential deposition	0		1
Rtkn2	No differential deposition	0		1
Rtn3	No differential deposition	0		1
Runx2	Tet+ & TFH	1.9908	36.4706	4
S100a10	No differential deposition	3.73627	92.2648	1
Samd12	No differential deposition	0		1
Samd9l	No differential deposition	0		1
Scaf4	No differential deposition	0		1
Scfd2	No differential deposition	0		1
Sdcbp2	No differential deposition	0		1
Sdf4	No differential deposition	0		1
Secisbp2l	No differential deposition	0		1
Serpina12	No differential deposition	0		1
Setbp1	Tet+ & TFH	-4.40693	25.861	1
Sgms1	Deposition only TFH	0		1
Sh3kbp1	No differential deposition	-1.67097	53.8056	1
Sik3	No differential deposition	-4.03708	51.0173	1
Sipa1l2	No differential deposition	0		1
Slamf6	Deposition only Tet+	3.59855	36.3101	1
Slc12a8	No differential deposition	0		1
Slc19a3	No differential deposition	0		1
Slc1a4	No differential deposition	0		1
Slc22a15	No differential deposition	-0.735974	8.04119	1
Slc25a12	No differential deposition	0		1
Slc25a19	No differential deposition	0		1
Slc36a3	No differential deposition	-0.154208	4.4786	1
Slc38a1	No differential deposition	-3.23794	102.001	1
Slc7a1	No differential deposition	-0.588291	27.9689	1
Slc9a9	No differential deposition	-28.6596	Inf	1
Slc9b2	No differential deposition	0		1
Slco3a1	No differential deposition	-2.1716	73.2412	1
Smad3	No differential deposition	-0.384861	27.8146	1
Smco4	No differential deposition	-0.547421	46.371	1
Smyd3	No differential deposition	-0.0922989	44.2287	1
Sntb1	No differential deposition	-5.76336	54.9246	1
Socs3	Deposition only TFH	0		1
Socs5	No differential deposition	0		1
Sorl1	No differential deposition	0		1
Sp4	No differential deposition	0		1
Spcs2	No differential deposition	0		1
Specc1l	No differential deposition	0		1
Spry1	Tet+ & TFH	-0.324134	6.63117	1
Spty2d1	No differential deposition	0		1
Sspn	No differential deposition	0		1
Sspo	No differential deposition	0		1
St6gal1	No differential deposition	-5.6772	20.4852	1
Stard13	No differential deposition	0		1
Stat3	No differential deposition	-12.713	34.7391	1
Stat4	No differential deposition	-0.81899	60.7951	1
Stim1	No differential deposition	-1.64125	49.4587	1
Stim2	No differential deposition	-1.01509	20.9254	1
Stk32c	Tet+ & TFH	0		1
Stk39	No differential deposition	-7.58476	125.242	1
Stx11	No differential deposition	-5.34144	56.7613	1
Stx6	No differential deposition	0		1
Susd1	No differential deposition	0		1
Synpo	Deposition only Tet+	0		1
Tank	No differential deposition	-9.37227	100.255	1
Tatdn1	No differential deposition	0		1
Tbc1d31	No differential deposition	-0.0866336	3.17146	1
Tbc1d4	Tet+ & TFH	-1.76956	38.8883	4
Tbl1xr1	No differential deposition	-0.888247	25.0478	1
Tbx21	Tet+ & TFH	0.175484	6.33607	2
Tead1	No differential deposition	0		1
Tfap2a	No differential deposition	0		1
Tg	No differential deposition	0		1
Tgfb1	No differential deposition	-0.165797	4.61023	1
Tiam1	Tet+ & TFH	0		1
Tigit	No differential deposition	-0.243755	26.8791	1
Tjp2	Tet+ & TFH	-0.347775	3.94261	6
Tm2d1	No differential deposition	0		1
Tmed1	No differential deposition	0		1
Tmem192	No differential deposition	0		1
Tmem2	No differential deposition	0		1
Tmem26	Deposition only Tet+	0		1
Tmem65	No differential deposition	0		1
Tmprss13	No differential deposition	0		1
Tmprss6	No differential deposition	0		1
Tnc	No differential deposition	-0.213008	20.569	1
Tnfaip8	No differential deposition	-7.45474	73.4234	1
Tnfrsf8	No differential deposition	-0.144315	8.39715	1
Tnfsf4	No differential deposition	0		1
Tnfsf8	Deposition only Tet+	-38.0782	2.28067	1
Tnfsf9	No differential deposition	0		1
Tnip3	No differential deposition	0.099803	2.9263	1
Tnr	No differential deposition	0		1
Tnrc6a	No differential deposition	0		1
Tomm20	No differential deposition	0		1
Tox	No differential deposition	-45.2428	260.399	1
Tox2	Tet+ & TFH	-5.87803	181.237	2
Tprg	No differential deposition	0		1
Trerf1	No differential deposition	-11.5314	161.695	1
Trib1	Tet+ & TFH	-0.365856	25.2065	1
Trp53inp1	No differential deposition	-1.14645	12.2874	1
Trpm6	No differential deposition	-0.219774	7.7484	1
Trps1	No differential deposition	-3.53868	8.94877	1
Tsen2	No differential deposition	0		1
Tspan14	No differential deposition	-0.259728	6.54601	1
Ttc39b	No differential deposition	1.09272	12.7431	1
Ttc39c	Tet+ & TFH	-0.137555	9.35214	4
Ttyh1	No differential deposition	0		1
Txndc16	No differential deposition	0		1
Ube2e3	No differential deposition	0		1
Ube2z	No differential deposition	0		1
Ubl3	No differential deposition	-1.17453	22.6248	1
Ubr2	No differential deposition	-0.156286	1.68093	1
Ugp2	No differential deposition	0		1
Usp6nl	No differential deposition	-0.926822	35.526	1
Utrn	Tet+ & TFH	-8.76078	110.175	1
Vangl2	No differential deposition	0		1
Vcpkmt	No differential deposition	0		1
Vdac1	No differential deposition	0		1
Vmp1	Tet+ & TFH	0		1
Vps13d	No differential deposition	0		1
Wisp1	No differential deposition	0		1
Wwox	No differential deposition	-1.20617	16.7237	1
Xkr6	Tet+ & TFH	0		1
Yam1	No differential deposition	0		1
Ythdc1	No differential deposition	-2.31941	15.6928	1
Zan	No differential deposition	0		1
Zap70	No differential deposition	-0.728081	21.4267	1
Zbtb1	No differential deposition	0		1
Zbtb32	No differential deposition	0.126554	23.5812	1
Zc3h12d	No differential deposition	0.112072	2.03854	1
Zc3h7a	No differential deposition	0		1
Zfp41	No differential deposition	0		1
Zfp831	No differential deposition	-0.586318	12.3752	1

## Sheet: H3K27me3
gene	status	fold	DE_sig	c
1110034G24Rik	No differential deposition	0		1
1500012K07Rik	No differential deposition	0		1
1600020E01Rik	No differential deposition	0		1
1700020N01Rik	No differential deposition	0		1
1700025M24Rik	No differential deposition	0		1
1700027F09Rik	No differential deposition	0		1
1700057G04Rik	No differential deposition	0		1
1700061F12Rik	No differential deposition	0		1
1700129C05Rik	No differential deposition	0		1
2700097O09Rik	No differential deposition	0		1
4930517O19Rik	No differential deposition	0		1
6430710C18Rik	No differential deposition	0		1
8030474K03Rik	No differential deposition	0		1
A130057D12Rik	No differential deposition	0		1
A330017A19Rik	No differential deposition	0		1
A430093F15Rik	No differential deposition	-0.331877	2.06218	1
A630001G21Rik	No differential deposition	0		1
Abcc4	No differential deposition	0		1
Abr	No differential deposition	0		1
Acot7	No differential deposition	0		1
Acoxl	Tet+ & TFH	0		1
Adap1	No differential deposition	0		1
Adat2	No differential deposition	0		1
Adck3	No differential deposition	0		1
Adcy7	No differential deposition	0		1
Adh4	No differential deposition	0		1
Adora2a	No differential deposition	0		1
Adprm	No differential deposition	0		1
Aebp2	No differential deposition	0		1
Agfg1	No differential deposition	0		1
Akap11	No differential deposition	0		1
Alcam	No differential deposition	0		1
Alpk2	No differential deposition	-0.240242	12.7243	1
Amd1	No differential deposition	-0.321243	15.4843	1
Amz2	No differential deposition	-0.174627	1.89732	1
Angptl2	No differential deposition	-0.360356	3.39947	1
Ankrd12	No differential deposition	-3.34975	114.567	1
Ankrd46	No differential deposition	0		1
Ankrd54	No differential deposition	0		1
Ankrd55	No differential deposition	-0.270148	21.1747	1
Ankrd6	No differential deposition	-0.183113	12.8863	1
Anxa2	No differential deposition	0		1
Arf6	No differential deposition	0		1
Arhgap15	No differential deposition	30.9662	24.0804	1
Arhgap26	No differential deposition	0		1
Arhgap31	No differential deposition	0.216215	4.14993	1
Arhgef3	No differential deposition	0		1
Arid5b	No differential deposition	-13.8367	93.0304	1
Asap1	No differential deposition	-6.77694	84.9385	1
Ascc1	No differential deposition	0		1
Atf3	No differential deposition	0		1
Atf7ip	No differential deposition	0		1
Atp2b1	No differential deposition	0		1
Atp6v1g3	No differential deposition	0		1
Atp8b5	No differential deposition	0		1
Atxn1	No differential deposition	9.82661	59.4636	1
Atxn7l1	No differential deposition	0		1
AU019990	No differential deposition	0		1
AU020206	No differential deposition	0		1
Auh	No differential deposition	0		1
Aven	No differential deposition	0		1
Axin2	No differential deposition	0		1
Bach2	Tet+ & TFH	17.1435	21.7503	4
Bcl2l15	No differential deposition	-0.0735145	1.98967	1
Bhlhe40	No differential deposition	0		1
Btd	No differential deposition	0		1
Btg1	No differential deposition	-6.04553	14.5452	1
Bub1b	No differential deposition	0		1
C1qtnf6	No differential deposition	0		1
C230024C17Rik	No differential deposition	0		1
C2cd2	No differential deposition	0		1
C9	No differential deposition	0		1
Cacna1s	No differential deposition	0		1
Calcoco1	No differential deposition	0		1
Camk1d	No differential deposition	-0.564362	16.7107	1
Camk2d	No differential deposition	-9.64142	63.3413	1
Car5b	No differential deposition	0		1
Casp3	No differential deposition	0		1
Casp4	No differential deposition	-5.87885	70.5091	1
Cbr4	No differential deposition	0		1
Ccdc67	No differential deposition	0		1
Ccnd3	No differential deposition	-0.245348	11.7418	1
Ccr1	No differential deposition	0		1
Ccr5	No differential deposition	0.155281	9.72882	1
Cd200	No differential deposition	0.271389	9.96424	1
Cd40lg	No differential deposition	-3.51583	95.0406	1
Cd44	No differential deposition	-9.71047	129.047	1
Cd47	No differential deposition	0.226746	3.74104	1
Cd52	No differential deposition	-9.17311	2.03487	1
Cd82	No differential deposition	0		1
Cd83	Deposition only TFH	-0.878512	21.916	1
Cd86	No differential deposition	0		1
Cdk6	No differential deposition	-0.409532	12.956	1
Cdk8	Deposition only TFH	0		1
Cebpa	Deposition only TFH	-0.182651	14.8659	1
Celf2	No differential deposition	-3.73723	64.5236	1
Cers4	No differential deposition	-0.583589	39.5532	1
Chn1	No differential deposition	-0.559144	13.4121	1
Chrna1	No differential deposition	0		1
Chst2	No differential deposition	0.0579856	7.05513	1
Cited2	No differential deposition	0		1
Cmah	No differential deposition	0.306782	2.53535	1
Cnot2	No differential deposition	-0.299299	1.56181	1
Commd1	No differential deposition	0		1
Cox7c	No differential deposition	0		1
Cpd	No differential deposition	0		1
Cpm	No differential deposition	-0.449996	10.2974	1
Csf1	No differential deposition	-0.0732305	2.63292	1
Cspg5	No differential deposition	0		1
Csrnp3	No differential deposition	0		1
Ctla4	No differential deposition	0		1
Cubn	No differential deposition	0		1
Cx3cr1	No differential deposition	0		1
Cxcr5	No differential deposition	-0.668374	77.5427	1
D430001F17Rik	No differential deposition	0		1
Dapp1	No differential deposition	0		1
Dars	No differential deposition	0		1
Dcbld2	No differential deposition	0		1
Dclk1	No differential deposition	0		1
Dhrs3	No differential deposition	-0.363028	38.5913	1
Dhx35	No differential deposition	0		1
Dio3	No differential deposition	0		1
Dleu2	No differential deposition	0		1
Dlg2	No differential deposition	0.146231	12.9754	1
Dnajc5b	No differential deposition	0		1
Dock8	No differential deposition	0		1
Dus2	No differential deposition	-0.1035	1.7494	1
Dusp14	No differential deposition	0		1
Dusp4	No differential deposition	-0.0817526	2.19669	1
Dynll2	No differential deposition	0		1
E130308A19Rik	No differential deposition	0		1
Ece1	No differential deposition	-0.21071	2.22642	1
Eea1	No differential deposition	-6.83146	12.6652	1
Egln3	No differential deposition	-0.28649	15.2372	1
Egr2	No differential deposition	-0.226828	24.3886	1
Egr4	Deposition only TFH	0		1
Ehbp1l1	No differential deposition	0		1
Elf1	No differential deposition	0		1
Elk3	No differential deposition	0		1
Enpp6	No differential deposition	0		1
Epm2a	No differential deposition	0		1
Eps8l3	No differential deposition	0		1
Ercc6l2	No differential deposition	0		1
Ets1	No differential deposition	-3.36879	4.20811	1
Etv6	No differential deposition	0		1
Ezh2	No differential deposition	0		1
F13a1	No differential deposition	0		1
Fam107b	No differential deposition	0		1
Fam110a	No differential deposition	0		1
Fam129a	No differential deposition	0.128454	2.05423	1
Fam43a	No differential deposition	-0.0988121	5.23544	1
Fam53b	No differential deposition	0.0604015	4.70912	1
Fam76b	No differential deposition	0		1
Farp1	No differential deposition	-2.95783	4.24965	1
Fbxw10	No differential deposition	0		1
Fbxw11	No differential deposition	-0.979988	17.8759	1
Fer1l6	No differential deposition	0		1
Fgd6	No differential deposition	0		1
Fhad1	No differential deposition	0		1
Filip1l	No differential deposition	-0.110266	6.62872	1
Fosb	No differential deposition	-8.64043	99.3369	1
Foxp1	Deposition only TFH	0		1
Fryl	No differential deposition	0		1
Fyn	No differential deposition	-11.7427	122.443	1
Gabpb1	No differential deposition	-3.96761	30.4898	1
Galm	No differential deposition	0		1
Galnt2	No differential deposition	-0.113943	4.48811	1
Gbp6	No differential deposition	0		1
Gdi2	No differential deposition	0		1
Gem	No differential deposition	-0.42121	21.7403	1
Gfod1	No differential deposition	0		1
Gm10113	No differential deposition	0		1
Gm10804	No differential deposition	0		1
Gm11454	No differential deposition	0		1
Gm12148	No differential deposition	0		1
Gm12610	No differential deposition	0		1
Gm13049	No differential deposition	0		1
Gm13218	No differential deposition	0		1
Gm13481	No differential deposition	0		1
Gm13982	No differential deposition	0		1
Gm14005	No differential deposition	0		1
Gm14488	No differential deposition	0		1
Gm16998	No differential deposition	0		1
Gm20388	No differential deposition	0		1
Gm20546	No differential deposition	0		1
Gm21060	No differential deposition	0		1
Gm21954	No differential deposition	0		1
Gm24601	No differential deposition	0		1
Gm26486	No differential deposition	0		1
Gm26544	No differential deposition	0		1
Gm26561	No differential deposition	0		1
Gm26612	No differential deposition	0		1
Gm26667	No differential deposition	0		1
Gm26686	No differential deposition	0		1
Gm26917	No differential deposition	-6.82592	2.0554	1
Gm26969	No differential deposition	0		1
Gm27007	No differential deposition	0		1
Gm27162	No differential deposition	0		1
Gm27977	No differential deposition	0		1
Gm28053	No differential deposition	0		1
Gm28502	No differential deposition	0		1
Gm28556	No differential deposition	0		1
Gm29094	No differential deposition	0		1
Gm29113	No differential deposition	0		1
Gm29150	No differential deposition	0		1
Gm29296	No differential deposition	0		1
Gm29395	No differential deposition	0		1
Gm3443	No differential deposition	0		1
Gm5148	No differential deposition	0		1
Gm8225	No differential deposition	0		1
Gna13	No differential deposition	-4.76665	154.568	1
Gna14	Deposition only TFH	-0.195722	7.46226	1
Gnaq	No differential deposition	-5.22585	15.9768	1
Gnptab	No differential deposition	-0.100802	3.13738	1
Gphn	No differential deposition	-0.217014	5.20659	1
Gpr15	No differential deposition	0		1
Gpr155	No differential deposition	0		1
Gpr68	No differential deposition	0.191722	1.84661	1
Gpr89	No differential deposition	0		1
Grb2	No differential deposition	-0.408421	1.64327	1
Grhl1	No differential deposition	0		1
Gsx2	No differential deposition	0		1
Gtdc1	No differential deposition	-6.71583	58.3204	1
Gtpbp4	No differential deposition	0		1
Gtsf1l	No differential deposition	0		1
Gucd1	No differential deposition	0		1
Gypc	No differential deposition	0		1
Gzmk	No differential deposition	0		1
H2afz	No differential deposition	4.11129	1.33855	1
Hdac4	No differential deposition	0		1
Heg1	No differential deposition	-1.25913	25.8456	1
Hiat1	No differential deposition	0		1
Hif1a	No differential deposition	-6.45511	104.984	1
Hivep1	No differential deposition	0		1
Hivep2	No differential deposition	-19.7552	66.239	1
Hlcs	No differential deposition	0		1
Hmces	No differential deposition	-0.218038	12.7402	1
Hsbp1l1	No differential deposition	0		1
Hsd17b2	No differential deposition	0		1
Hspb7	No differential deposition	0		1
Hvcn1	No differential deposition	0		1
Ica1	No differential deposition	0		1
Ica1l	No differential deposition	0		1
Icos	No differential deposition	0		1
Id2	No differential deposition	2.51887	17.2729	1
Ifitm3	No differential deposition	0		1
Ifng	No differential deposition	0.490039	3.51742	1
Ikzf2	No differential deposition	-5.99361	41.4	1
Ikzf3	No differential deposition	-1.42118	27.9657	1
Il10	No differential deposition	3.72632	27.6138	1
Il1rapl1	No differential deposition	0		1
Il21	No differential deposition	-1.97622	7.49572	1
Il2rb	No differential deposition	0		1
Inpp4b	No differential deposition	1.5571	9.47073	1
Ipmk	No differential deposition	-0.788108	7.7757	1
Iqgap1	No differential deposition	1.01504	6.59048	1
Irf2bp2	No differential deposition	0		1
Ispd	No differential deposition	0		1
Itga4	No differential deposition	7.17703	194.968	1
Itgav	No differential deposition	0		1
Itpkb	No differential deposition	-4.14153	28.2786	1
Itpr1	No differential deposition	-1.22524	11.7339	1
Jak2	No differential deposition	0.912841	6.12728	1
Jarid2	No differential deposition	-18.7191	96.3778	1
Jdp2	Deposition only TFH	-0.0757862	5.79397	1
Jmjd1c	No differential deposition	-0.62386	31.0806	1
Kcnip1	No differential deposition	0		1
Kcnk5	No differential deposition	0		1
Kcnma1	Deposition only TFH	0		1
Kdm2b	No differential deposition	-1.86535	10.9182	1
Kdm7a	No differential deposition	0		1
Kif13a	No differential deposition	-0.12446	3.70582	1
Kif20b	No differential deposition	0		1
Kmt2a	No differential deposition	0		1
Ksr1	No differential deposition	-0.709189	27.2989	1
Ksr2	No differential deposition	0		1
Lag3	No differential deposition	0		1
Lars2	No differential deposition	0		1
Ldlrad4	No differential deposition	-6.81083	27.3684	1
Lmnb1	No differential deposition	0		1
Lnx2	No differential deposition	-1.49299	53.9489	1
Lonrf2	No differential deposition	0		1
Lpin1	No differential deposition	0		1
Lrig1	No differential deposition	-1.36824	35.1551	1
Lrrc8d	No differential deposition	-0.153215	2.52298	1
Lsm4	No differential deposition	0		1
Maf	No differential deposition	-5.16487	29.576	1
Mafg	No differential deposition	-0.0917367	5.16578	1
Malt1	No differential deposition	-20.5667	169.355	1
Maml2	No differential deposition	0		1
Map2k3	No differential deposition	-0.160708	9.11649	1
Map3k7	No differential deposition	0		1
Mapre2	No differential deposition	-9.11775	25.8149	1
Matn2	No differential deposition	0		1
Max	No differential deposition	-0.227586	16.2738	1
Mbnl1	No differential deposition	0		1
Mchr1	No differential deposition	0		1
Mcoln2	No differential deposition	0		1
Mcoln3	No differential deposition	0		1
Mcu	No differential deposition	0		1
Mdfic	No differential deposition	0		1
Mdm1	No differential deposition	0		1
Mfap5	No differential deposition	0		1
Mfhas1	No differential deposition	0		1
Mlf1	No differential deposition	0		1
Mllt3	No differential deposition	0		1
Mmd	No differential deposition	-0.19953	3.51742	1
Mmp10	No differential deposition	0		1
Mphosph6	No differential deposition	0		1
Mpp2	No differential deposition	0		1
Msi2	No differential deposition	-1.36471	35.3762	1
Mstn	No differential deposition	0		1
Mybpc1	No differential deposition	0		1
Myo1d	No differential deposition	-0.15784	16.1121	1
Myo1e	No differential deposition	0		1
Myo3b	No differential deposition	0.239686	13.4131	1
n-R5-8s1	No differential deposition	0		1
N4bp1	No differential deposition	0		1
Nampt	No differential deposition	-1.86518	27.2866	1
Ncoa2	No differential deposition	0		1
Ndufaf6	No differential deposition	0		1
Neb	No differential deposition	0.543033	15.3949	1
Neil2	No differential deposition	0		1
Nek6	No differential deposition	0		1
Nek7	No differential deposition	-7.16181	13.5092	1
Nf2	No differential deposition	0		1
Nfatc1	No differential deposition	-1.71932	24.3092	1
Nfia	No differential deposition	-11.3534	93.8914	1
Nfil3	No differential deposition	0		1
Nfkb1	No differential deposition	-37.9458	39.0817	1
Nfkbil1	No differential deposition	0		1
Nfkbiz	No differential deposition	-9.06514	110.571	1
Ngly1	No differential deposition	0		1
Nlrc5	No differential deposition	0		1
Nod2	No differential deposition	0		1
Nol10	No differential deposition	-0.401045	23.2566	1
Nop58	No differential deposition	0		1
Npas2	Deposition only TFH	0		2
Nr3c2	No differential deposition	0		1
Nrip1	No differential deposition	-2.14695	34.6342	1
Nrn1	No differential deposition	1.38885	46.2264	1
Nrp1	No differential deposition	0		1
Nt5e	No differential deposition	0		1
Odc1	No differential deposition	-3.76592	27.7914	1
Osbpl3	No differential deposition	-0.631822	42.2777	1
Osbpl8	No differential deposition	-6.58315	41.8771	1
Ostf1	No differential deposition	0		1
Pbx3	No differential deposition	-8.07618	44.0412	1
Pcyox1l	No differential deposition	0		1
Pdcd1	No differential deposition	-1.40536	90.184	1
Pde4b	No differential deposition	0		1
Pdhx	No differential deposition	0		1
Peak1	No differential deposition	-0.865289	20.6479	1
Pear1	No differential deposition	-0.138703	8.43799	1
Pgap1	No differential deposition	0		1
Phactr2	No differential deposition	-9.06827	63.0959	1
Pip4k2a	No differential deposition	0		1
Pipox	No differential deposition	-0.0620078	6.21679	1
Pkdcc	No differential deposition	0		1
Plagl1	No differential deposition	-6.59745	14.7657	1
Plcb4	No differential deposition	-3.59096	60.7126	1
Plcl2	No differential deposition	-0.614879	2.89488	1
Plekhm2	No differential deposition	0		1
Plxnc1	Deposition only TFH	0		1
Pm20d1	No differential deposition	0		1
Polk	No differential deposition	0		1
Pou2af1	No differential deposition	-0.497861	53.7629	1
Pou2f2	No differential deposition	0.328751	23.063	1
Ppp1r16b	No differential deposition	-3.78795	56.9122	1
Ppp2r5c	No differential deposition	0		1
Ppp4r4	No differential deposition	0		1
Prkca	No differential deposition	-33.6976	85.7482	1
Prkch	No differential deposition	-9.14679	26.1594	1
Prkg1	No differential deposition	0		1
Prr13	No differential deposition	0		1
Prrc2b	No differential deposition	0		1
Prune2	No differential deposition	0		1
Psma6	No differential deposition	0		1
Ptger2	No differential deposition	-0.210712	7.26966	1
Ptger4	No differential deposition	-1.51839	1.86273	1
Ptk2b	No differential deposition	-1.49088	14.8146	1
Ptplad1	No differential deposition	0		1
Ptpn11	No differential deposition	-0.401142	10.7659	1
Ptpn13	No differential deposition	-13.099	67.4315	1
Ptpn22	No differential deposition	3.20991	81.9305	1
Ptpn5	No differential deposition	-0.473665	8.81543	1
Rab11fip1	No differential deposition	0		1
Rab8b	No differential deposition	-7.55579	11.103	1
Rabgef1	No differential deposition	-0.17477	7.53618	1
Rad51b	No differential deposition	0		1
Raet1e	No differential deposition	-6.64171	23.561	1
Raf1	No differential deposition	-7.75111	63.6267	1
Ralgps1	No differential deposition	-0.191935	7.56048	1
Rap1b	No differential deposition	-0.948005	13.7762	1
Rapgef1	No differential deposition	-1.22136	53.3615	1
Rasl11a	No differential deposition	0		1
Rbm20	No differential deposition	0		1
Rbpj	No differential deposition	0		1
Rcl1	No differential deposition	0		1
Reps1	No differential deposition	-0.375097	2.04113	1
Rgs16	No differential deposition	-2.22163	31.6434	1
Rgs8	No differential deposition	0		1
Rnf157	No differential deposition	-0.309763	7.31138	1
Rnf19a	No differential deposition	-0.58016	25.5113	1
Rnf216	No differential deposition	-0.176432	4.18166	1
Rora	No differential deposition	1.97751	48.6999	1
RP23-132G24.2	No differential deposition	0		1
RP23-242C19.8	No differential deposition	0		1
RP23-415L22.2	No differential deposition	0		1
RP24-559D1.1	No differential deposition	0		1
RP24-68C1.3	No differential deposition	0		1
RP24-92E18.1	No differential deposition	0		1
RP24-92E18.2	No differential deposition	0		1
Rpa2	No differential deposition	0		1
Rpl7a-ps3	No differential deposition	0		1
Rplp1	No differential deposition	0		1
Rps29	No differential deposition	0		1
Rps6ka1	No differential deposition	0		1
Rreb1	No differential deposition	0		1
Rtkn2	No differential deposition	0		1
Rtn3	No differential deposition	0		1
Runx2	Tet+ & TFH	1.9908	36.4706	1
S100a10	No differential deposition	3.73627	92.2648	1
Samd12	No differential deposition	0		1
Samd9l	No differential deposition	0		1
Scaf4	No differential deposition	0		1
Scfd2	No differential deposition	0		1
Sdcbp2	No differential deposition	0		1
Sdf4	No differential deposition	0		1
Secisbp2l	No differential deposition	0		1
Serpina12	No differential deposition	0		1
Setbp1	No differential deposition	-4.40693	25.861	1
Sgms1	Tet+ & TFH	0		1
Sh3kbp1	No differential deposition	-1.67097	53.8056	1
Sik3	No differential deposition	-4.03708	51.0173	1
Sipa1l2	No differential deposition	0		1
Slamf6	No differential deposition	3.59855	36.3101	1
Slc12a8	No differential deposition	0		1
Slc19a3	No differential deposition	0		1
Slc1a4	No differential deposition	0		1
Slc22a15	No differential deposition	-0.735974	8.04119	1
Slc25a12	No differential deposition	0		1
Slc25a19	No differential deposition	0		1
Slc36a3	No differential deposition	-0.154208	4.4786	1
Slc38a1	No differential deposition	-3.23794	102.001	1
Slc7a1	No differential deposition	-0.588291	27.9689	1
Slc9a9	No differential deposition	-28.6596	Inf	1
Slc9b2	No differential deposition	0		1
Slco3a1	No differential deposition	-2.1716	73.2412	1
Smad3	No differential deposition	-0.384861	27.8146	1
Smco4	No differential deposition	-0.547421	46.371	1
Smyd3	No differential deposition	-0.0922989	44.2287	1
Sntb1	No differential deposition	-5.76336	54.9246	1
Socs3	No differential deposition	0		1
Socs5	No differential deposition	0		1
Sorl1	No differential deposition	0		1
Sp4	No differential deposition	0		1
Spcs2	No differential deposition	0		1
Specc1l	No differential deposition	0		1
Spry1	No differential deposition	-0.324134	6.63117	1
Spty2d1	No differential deposition	0		1
Sspn	No differential deposition	0		1
Sspo	No differential deposition	0		1
St6gal1	No differential deposition	-5.6772	20.4852	1
Stard13	No differential deposition	0		1
Stat3	No differential deposition	-12.713	34.7391	1
Stat4	No differential deposition	-0.81899	60.7951	1
Stim1	No differential deposition	-1.64125	49.4587	1
Stim2	No differential deposition	-1.01509	20.9254	1
Stk32c	No differential deposition	0		1
Stk39	No differential deposition	-7.58476	125.242	1
Stx11	Deposition only TFH	-5.34144	56.7613	1
Stx6	No differential deposition	0		1
Susd1	No differential deposition	0		1
Synpo	No differential deposition	0		1
Tank	No differential deposition	-9.37227	100.255	1
Tatdn1	No differential deposition	0		1
Tbc1d31	No differential deposition	-0.0866336	3.17146	1
Tbc1d4	No differential deposition	-1.76956	38.8883	1
Tbl1xr1	No differential deposition	-0.888247	25.0478	1
Tbx21	No differential deposition	0.175484	6.33607	1
Tead1	No differential deposition	0		1
Tfap2a	No differential deposition	0		1
Tg	No differential deposition	0		1
Tgfb1	No differential deposition	-0.165797	4.61023	1
Tiam1	No differential deposition	0		1
Tigit	No differential deposition	-0.243755	26.8791	1
Tjp2	Deposition only TFH	-0.347775	3.94261	1
Tm2d1	No differential deposition	0		1
Tmed1	No differential deposition	0		1
Tmem192	No differential deposition	0		1
Tmem2	No differential deposition	0		1
Tmem26	No differential deposition	0		1
Tmem65	No differential deposition	0		1
Tmprss13	No differential deposition	0		1
Tmprss6	No differential deposition	0		1
Tnc	No differential deposition	-0.213008	20.569	1
Tnfaip8	No differential deposition	-7.45474	73.4234	1
Tnfrsf8	No differential deposition	-0.144315	8.39715	1
Tnfsf4	No differential deposition	0		1
Tnfsf8	No differential deposition	-38.0782	2.28067	1
Tnfsf9	No differential deposition	0		1
Tnip3	No differential deposition	0.099803	2.9263	1
Tnr	No differential deposition	0		1
Tnrc6a	No differential deposition	0		1
Tomm20	No differential deposition	0		1
Tox	No differential deposition	-45.2428	260.399	1
Tox2	Deposition only TFH	-5.87803	181.237	1
Tprg	No differential deposition	0		1
Trerf1	No differential deposition	-11.5314	161.695	1
Trib1	No differential deposition	-0.365856	25.2065	1
Trp53inp1	No differential deposition	-1.14645	12.2874	1
Trpm6	No differential deposition	-0.219774	7.7484	1
Trps1	No differential deposition	-3.53868	8.94877	1
Tsen2	No differential deposition	0		1
Tspan14	No differential deposition	-0.259728	6.54601	1
Ttc39b	No differential deposition	1.09272	12.7431	1
Ttc39c	Deposition only TFH	-0.137555	9.35214	1
Ttyh1	No differential deposition	0		1
Txndc16	No differential deposition	0		1
Ube2e3	No differential deposition	0		1
Ube2z	No differential deposition	0		1
Ubl3	No differential deposition	-1.17453	22.6248	1
Ubr2	No differential deposition	-0.156286	1.68093	1
Ugp2	No differential deposition	0		1
Usp6nl	No differential deposition	-0.926822	35.526	1
Utrn	Deposition only TFH	-8.76078	110.175	1
Vangl2	No differential deposition	0		1
Vcpkmt	No differential deposition	0		1
Vdac1	No differential deposition	0		1
Vmp1	No differential deposition	0		1
Vps13d	No differential deposition	0		1
Wisp1	No differential deposition	0		1
Wwox	No differential deposition	-1.20617	16.7237	1
Xkr6	No differential deposition	0		1
Yam1	No differential deposition	0		1
Ythdc1	No differential deposition	-2.31941	15.6928	1
Zan	No differential deposition	0		1
Zap70	No differential deposition	-0.728081	21.4267	1
Zbtb1	No differential deposition	0		1
Zbtb32	No differential deposition	0.126554	23.5812	1
Zc3h12d	No differential deposition	0.112072	2.03854	1
Zc3h7a	No differential deposition	0		1
Zfp41	No differential deposition	0		1
Zfp831	No differential deposition	-0.586318	12.3752	1
