# Supplementary material for: T-follicular helper cells are epigenetically poised to transdifferentiate into T-regulatory type 1 cells
Source: eLife. 2024 Nov 22;13:RP97665. doi: 10.7554/eLife.97665 (PMC11584177; doi:10.7554/eLife.97665)
Supplement: Figure 4—source data 2. [file elife-97665-fig4-data2.xlsx]

## Sheet: Sheet1
Comparison	Direction	Annotation	Number	Relevant genes
Tet_Tcon	Hypermethylated	Distal Intergenic	949	Cd28, Ctla4, Icos, Myb, Ifng, Itk, Tcf7, Ccr7, Stat3, E2f1, Il21, S1pr1, Lef1, Bach2, Nfia, Id3, Tgfbr3, Selplg, Il21r, Tgfbr2, Sh2d1a
Tet_Tcon	Hypermethylated	gene_body	3436	Stat1, Cd28, Ctla4, Egr2, Itk, Havcr2, Tcf7, Tbx21, Ccr7, Jdp2, Irf4, Gzmb, Il7r, Bcl6, Cblb, Entpd1, Tox2, Lef1, Bach2, Tgfbr1, Nfia, Id3, Tnfrsf18, Tgfbr3, Selplg, Foxp1, Il21r, Maf, Cbfa2t3, Rora, Tgfbr2
Tet_Tcon	Hypermethylated	promoter	182	Itk, Id2, Bach2, Tgfbr3, Selplg, Cbfa2t3
Tet_Tcon	Hypomethylated	Distal Intergenic	1299	Ctla4, Icos, Cxcr4, Il10, Tnfsf4, Fasl, Prdm1, Egr2, Ifng, Tbx21, Batf, Irf4, Serpinb6b, Myc, Vdr, Tox2, Il21, S1pr1, Bach2, Rbpj, Ascl2, Maf
Tet_Tcon	Hypomethylated	gene_body	3300	Stat4, Stat1, Cd28, Ctla4, Icos, Pdcd1, Cxcr4, Il10, Elk4, Fasl, Myb, Prdm1, Ifng, Irf1, Tbx21, Stat3, Grhl1, Ahr, Batf, Irf4, Nfil3, Myc, Vdr, Bcl6, Tigit, Cblb, Runx2, Cd226, Entpd1, Il21, Lef1, Tnfrsf4, Rbpj, Tgfbr3, Foxp1, Lag3, Il21r, Hmgb2, Maf, Cxcr5, Rora, Nt5e, Tgfbr2, Cxcr3
Tet_Tcon	Hypomethylated	promoter	171	Pdcd1, Il21, Lag3
Tet_TFH	Hypermethylated	Distal Intergenic	77	Nfil3
Tet_TFH	Hypermethylated	gene_body	284	Il4, Batf, Tox2, Lef1, Tnfrsf18, Tgfbr3, Maf, Cxcr5
Tet_TFH	Hypermethylated	promoter	14
Tet_TFH	Hypomethylated	Distal Intergenic	115	Il10, Tnfsf4, Fasl, Ifng, Id2, Maf
Tet_TFH	Hypomethylated	gene_body	354	Fasl, Myb, Tbx21, Irf4, Cd226, Entpd1, Il21, Lef1, Rbpj, Foxp1, Lag3, Klf2, Rora, Tgfbr2
Tet_TFH	Hypomethylated	promoter	14	Ifng
TFH_Tcon	Hypermethylated	Distal Intergenic	1390	Cd28, Icos, Cxcr4, Myb, Ifng, Itk, Tcf7, Ccr7, Sox4, S1pr1, Lef1, Bach2, Tgfbr1, Nfia, Id3, Tgfbr3, Selplg, Lag3, Cebpa, Il21r, Maf, Tgfbr2, Sh2d1a
TFH_Tcon	Hypermethylated	gene_body	4745	Stat1, Cd28, Ctla4, Sell, Myb, Itk, Havcr2, Tcf7, Irf1, Tbx21, Ccr7, Id2, Jdp2, Gzmb, Il7r, Bcl6, Cblb, Runx2, Entpd1, Tox2, Lef1, Bach2, Tgfbr1, Nfia, Tnfrsf18, Tgfbr3, Selplg, Foxp1, Il21r, Klf2, Maf, Cbfa2t3, Tgfbr2
TFH_Tcon	Hypermethylated	promoter	282	Ifng, Itk, Bach2, Id3, Tgfbr3, Selplg, Cbfa2t3
TFH_Tcon	Hypomethylated	Distal Intergenic	1159	Ctla4, Icos, Pdcd1, Cxcr4, Il10, Tnfsf4, Fasl, Prdm1, Egr2, Ifng, Batf, Serpinb6b, Nfil3, Myc, Vdr, Tox2, Il21, S1pr1, Bach2, Rbpj, Ascl2, Maf, Sh2d1a
TFH_Tcon	Hypomethylated	gene_body	2846	Stat4, Stat1, Cd28, Ctla4, Icos, Pdcd1, Cxcr4, Il10, Elk4, Prdm1, Egr2, Il4, Irf1, Tbx21, Stat3, Grhl1, Batf, Irf4, Nfil3, Itga2, Vdr, Bcl6, Tigit, Cblb, Entpd1, Tox2, Il21, Lef1, Tnfrsf4, Rbpj, Foxp1, Lag3, Cebpa, Il21r, Hmgb2, Maf, Cxcr5, Rora, Nt5e, Cxcr3
TFH_Tcon	Hypomethylated	promoter	150	Pdcd1, Il21, Il17rc
