# Supplementary material for: T-follicular helper cells are epigenetically poised to transdifferentiate into T-regulatory type 1 cells
Source: eLife. 2024 Nov 22;13:RP97665. doi: 10.7554/eLife.97665 (PMC11584177; doi:10.7554/eLife.97665)
Supplement: Figure 4—source data 3. [file elife-97665-fig4-data3.xlsx]

## Sheet: Sheet1
gene	type.x	ms.x	type.y	ms.y	status
Axin2	0	0	Distal Intergenic	undetermined	undetermined
Jarid2	Distal Intergenic	hypomethylated	Distal Intergenic	undetermined	undetermined
Jarid2	Distal Intergenic	hypomethylated	gene_body	hypomethylated	Shared
Jarid2	gene_body	hypomethylated	Distal Intergenic	undetermined	undetermined
Jarid2	gene_body	hypomethylated	gene_body	hypomethylated	Shared
Filip1l	gene_body	hypermethylated	gene_body	hypomethylated	undetermined
Gnaq	0	0	gene_body	hypermethylated	Only TFH
Camk1d	gene_body	hypermethylated	gene_body	hypermethylated	Shared
Gm5148	Distal Intergenic	undetermined	Distal Intergenic	hypermethylated	undetermined
Cebpa	0	0	Distal Intergenic	hypermethylated	Only TFH
Cebpa	0	0	gene_body	hypomethylated	Only TFH
Maf	Distal Intergenic	hypomethylated	Distal Intergenic	hypomethylated	Shared
Maf	Distal Intergenic	hypomethylated	gene_body	hypomethylated	Shared
Maf	gene_body	hypomethylated	Distal Intergenic	hypomethylated	Shared
Maf	gene_body	hypomethylated	gene_body	hypomethylated	Shared
Fam43a	Distal Intergenic	hypomethylated	Distal Intergenic	hypomethylated	Shared
Fam43a	gene_body	hypermethylated	Distal Intergenic	hypomethylated	undetermined
Cd47	Distal Intergenic	hypomethylated	Distal Intergenic	hypomethylated	Shared
Cd47	Distal Intergenic	hypomethylated	gene_body	hypermethylated	undetermined
Cd47	gene_body	hypermethylated	Distal Intergenic	hypomethylated	undetermined
Cd47	gene_body	hypermethylated	gene_body	hypermethylated	Shared
Cd44	Distal Intergenic	undetermined	Distal Intergenic	hypomethylated	undetermined
Cd44	Distal Intergenic	undetermined	gene_body	hypomethylated	undetermined
Cd44	gene_body	hypomethylated	Distal Intergenic	hypomethylated	Shared
Cd44	gene_body	hypomethylated	gene_body	hypomethylated	Shared
Cxcr5	gene_body	hypomethylated	gene_body	hypomethylated	Shared
Gphn	gene_body	hypomethylated	gene_body	hypomethylated	Shared
Eea1	Distal Intergenic	hypomethylated	Distal Intergenic	hypomethylated	Shared
Eea1	Distal Intergenic	hypomethylated	gene_body	hypomethylated	Shared
Eea1	gene_body	hypomethylated	Distal Intergenic	hypomethylated	Shared
Eea1	gene_body	hypomethylated	gene_body	hypomethylated	Shared
Dio3	0	0	gene_body	hypermethylated	Only TFH
Cited2	Distal Intergenic	hypomethylated	Distal Intergenic	undetermined	undetermined
Cited2	Distal Intergenic	hypomethylated	gene_body	hypomethylated	Shared
Cited2	gene_body	hypomethylated	Distal Intergenic	undetermined	undetermined
Cited2	gene_body	hypomethylated	gene_body	hypomethylated	Shared
Ptpn22	gene_body	hypomethylated	gene_body	hypomethylated	Shared
Jak2	gene_body	hypomethylated	Distal Intergenic	undetermined	undetermined
Jak2	gene_body	hypomethylated	gene_body	hypomethylated	Shared
Jak2	gene_body	hypomethylated	promoter	hypomethylated	Shared
Jak2	promoter	hypomethylated	Distal Intergenic	undetermined	undetermined
Jak2	promoter	hypomethylated	gene_body	hypomethylated	Shared
Jak2	promoter	hypomethylated	promoter	hypomethylated	Shared
Tomm20	gene_body	hypomethylated	gene_body	hypomethylated	Shared
Lnx2	gene_body	hypomethylated	gene_body	hypomethylated	Shared
Angptl2	gene_body	hypomethylated	gene_body	hypomethylated	Shared
Ctla4	Distal Intergenic	hypomethylated	Distal Intergenic	hypomethylated	Shared
Ctla4	Distal Intergenic	hypomethylated	gene_body	hypomethylated	Shared
Ctla4	gene_body	hypomethylated	Distal Intergenic	hypomethylated	Shared
Ctla4	gene_body	hypomethylated	gene_body	hypomethylated	Shared
Eps8l3	Distal Intergenic	hypermethylated	Distal Intergenic	hypermethylated	Shared
Eps8l3	Distal Intergenic	hypermethylated	gene_body	hypomethylated	undetermined
Eps8l3	gene_body	hypomethylated	Distal Intergenic	hypermethylated	undetermined
Eps8l3	gene_body	hypomethylated	gene_body	hypomethylated	Shared
Osbpl3	gene_body	hypomethylated	Distal Intergenic	hypomethylated	Shared
Osbpl3	gene_body	hypomethylated	gene_body	hypomethylated	Shared
Plcb4	gene_body	hypomethylated	gene_body	hypomethylated	Shared
Ptpn13	Distal Intergenic	hypomethylated	Distal Intergenic	hypomethylated	Shared
Ptpn13	Distal Intergenic	hypomethylated	gene_body	hypomethylated	Shared
Ptpn13	gene_body	hypomethylated	Distal Intergenic	hypomethylated	Shared
Ptpn13	gene_body	hypomethylated	gene_body	hypomethylated	Shared
Tsen2	Distal Intergenic	hypomethylated	Distal Intergenic	hypomethylated	Shared
Tigit	gene_body	hypomethylated	gene_body	hypomethylated	Shared
N4bp1	gene_body	hypomethylated	gene_body	hypomethylated	Shared
Usp6nl	gene_body	hypomethylated	gene_body	hypomethylated	Shared
Il10	Distal Intergenic	hypomethylated	Distal Intergenic	hypomethylated	Shared
Il10	Distal Intergenic	hypomethylated	gene_body	hypomethylated	Shared
Il10	gene_body	hypomethylated	Distal Intergenic	hypomethylated	Shared
Il10	gene_body	hypomethylated	gene_body	hypomethylated	Shared
Cd83	Distal Intergenic	hypomethylated	Distal Intergenic	hypomethylated	Shared
Cd83	Distal Intergenic	hypomethylated	gene_body	hypomethylated	Shared
Cd83	gene_body	hypomethylated	Distal Intergenic	hypomethylated	Shared
Cd83	gene_body	hypomethylated	gene_body	hypomethylated	Shared
Fyn	gene_body	hypomethylated	gene_body	hypomethylated	Shared
Mmp10	gene_body	hypomethylated	gene_body	hypomethylated	Shared
Mmp10	gene_body	hypomethylated	promoter	hypomethylated	Shared
Mmp10	promoter	hypomethylated	gene_body	hypomethylated	Shared
Mmp10	promoter	hypomethylated	promoter	hypomethylated	Shared
Tead1	gene_body	hypomethylated	gene_body	hypomethylated	Shared
Plekhm2	gene_body	hypermethylated	gene_body	hypermethylated	Shared
Plcl2	Distal Intergenic	hypermethylated	Distal Intergenic	hypomethylated	undetermined
Plcl2	Distal Intergenic	hypermethylated	gene_body	undetermined	undetermined
Plcl2	gene_body	hypomethylated	Distal Intergenic	hypomethylated	Shared
Plcl2	gene_body	hypomethylated	gene_body	undetermined	undetermined
Jmjd1c	gene_body	hypermethylated	0	0	Only Tet
Rgs8	Distal Intergenic	hypomethylated	Distal Intergenic	hypomethylated	Shared
Slc38a1	gene_body	hypomethylated	Distal Intergenic	hypermethylated	undetermined
Slc38a1	gene_body	hypomethylated	gene_body	undetermined	undetermined
Ptpn11	Distal Intergenic	hypomethylated	Distal Intergenic	hypomethylated	Shared
Ptpn11	Distal Intergenic	hypomethylated	gene_body	hypomethylated	Shared
Ptpn11	gene_body	hypomethylated	Distal Intergenic	hypomethylated	Shared
Ptpn11	gene_body	hypomethylated	gene_body	hypomethylated	Shared
Ptpn11	promoter	hypomethylated	Distal Intergenic	hypomethylated	Shared
Ptpn11	promoter	hypomethylated	gene_body	hypomethylated	Shared
Akap11	Distal Intergenic	hypomethylated	Distal Intergenic	hypomethylated	Shared
Ets1	gene_body	hypomethylated	gene_body	hypomethylated	Shared
Ptger2	promoter	hypomethylated	promoter	hypomethylated	Shared
Trpm6	Distal Intergenic	hypomethylated	Distal Intergenic	hypomethylated	Shared
Trpm6	Distal Intergenic	hypomethylated	gene_body	hypomethylated	Shared
Trpm6	Distal Intergenic	hypomethylated	promoter	hypermethylated	undetermined
Trpm6	gene_body	undetermined	Distal Intergenic	hypomethylated	undetermined
Trpm6	gene_body	undetermined	gene_body	hypomethylated	undetermined
Trpm6	gene_body	undetermined	promoter	hypermethylated	undetermined
Trpm6	promoter	hypermethylated	Distal Intergenic	hypomethylated	undetermined
Trpm6	promoter	hypermethylated	gene_body	hypomethylated	undetermined
Trpm6	promoter	hypermethylated	promoter	hypermethylated	Shared
Vps13d	Distal Intergenic	hypermethylated	Distal Intergenic	hypermethylated	Shared
Vps13d	Distal Intergenic	hypermethylated	gene_body	hypermethylated	Shared
Vps13d	gene_body	hypermethylated	Distal Intergenic	hypermethylated	Shared
Vps13d	gene_body	hypermethylated	gene_body	hypermethylated	Shared
Ttc39c	gene_body	hypomethylated	gene_body	hypomethylated	Shared
Zfp41	gene_body	hypomethylated	gene_body	hypomethylated	Shared
Trib1	Distal Intergenic	hypermethylated	gene_body	hypomethylated	undetermined
Trib1	gene_body	hypomethylated	gene_body	hypomethylated	Shared
Ikzf2	Distal Intergenic	hypomethylated	Distal Intergenic	hypomethylated	Shared
Ikzf2	Distal Intergenic	hypomethylated	gene_body	hypomethylated	Shared
Ikzf2	gene_body	hypomethylated	Distal Intergenic	hypomethylated	Shared
Ikzf2	gene_body	hypomethylated	gene_body	hypomethylated	Shared
Il21	Distal Intergenic	hypomethylated	Distal Intergenic	hypomethylated	Shared
Il21	Distal Intergenic	hypomethylated	gene_body	hypomethylated	Shared
Il21	Distal Intergenic	hypomethylated	promoter	hypomethylated	Shared
Il21	gene_body	hypomethylated	Distal Intergenic	hypomethylated	Shared
Il21	gene_body	hypomethylated	gene_body	hypomethylated	Shared
Il21	gene_body	hypomethylated	promoter	hypomethylated	Shared
Il21	promoter	hypomethylated	Distal Intergenic	hypomethylated	Shared
Il21	promoter	hypomethylated	gene_body	hypomethylated	Shared
Il21	promoter	hypomethylated	promoter	hypomethylated	Shared
Stx11	Distal Intergenic	hypomethylated	Distal Intergenic	hypomethylated	Shared
Stx11	Distal Intergenic	hypomethylated	gene_body	hypomethylated	Shared
Stx11	gene_body	hypomethylated	Distal Intergenic	hypomethylated	Shared
Stx11	gene_body	hypomethylated	gene_body	hypomethylated	Shared
Smco4	Distal Intergenic	hypomethylated	Distal Intergenic	hypomethylated	Shared
Smco4	Distal Intergenic	hypomethylated	gene_body	hypomethylated	Shared
Smco4	gene_body	undetermined	Distal Intergenic	hypomethylated	undetermined
Smco4	gene_body	undetermined	gene_body	hypomethylated	undetermined
Ptpn5	gene_body	hypomethylated	gene_body	hypomethylated	Shared
Il1rapl1	0	0	gene_body	hypomethylated	Only TFH
Tox	Distal Intergenic	hypermethylated	Distal Intergenic	hypermethylated	Shared
Tox	Distal Intergenic	hypermethylated	gene_body	hypermethylated	Shared
Tox	gene_body	undetermined	Distal Intergenic	hypermethylated	undetermined
Tox	gene_body	undetermined	gene_body	hypermethylated	undetermined
Iqgap1	gene_body	hypomethylated	gene_body	hypomethylated	Shared
Tm2d1	gene_body	hypermethylated	Distal Intergenic	hypermethylated	Shared
Tm2d1	gene_body	hypermethylated	gene_body	hypermethylated	Shared
Stk39	gene_body	hypomethylated	gene_body	hypomethylated	Shared
Fhad1	gene_body	hypermethylated	gene_body	hypermethylated	Shared
Stat4	gene_body	hypomethylated	gene_body	hypomethylated	Shared
C230024C17Rik	gene_body	undetermined	gene_body	undetermined	undetermined
Rgs16	gene_body	hypomethylated	gene_body	hypomethylated	Shared
Sntb1	gene_body	hypomethylated	gene_body	hypomethylated	Shared
Ralgps1	gene_body	hypermethylated	gene_body	hypermethylated	Shared
Ralgps1	promoter	hypomethylated	gene_body	hypermethylated	undetermined
Vmp1	gene_body	hypomethylated	gene_body	hypomethylated	Shared
Ankrd6	gene_body	hypermethylated	gene_body	hypermethylated	Shared
Tnc	gene_body	hypermethylated	gene_body	hypermethylated	Shared
Spry1	Distal Intergenic	hypomethylated	Distal Intergenic	hypomethylated	Shared
Spry1	Distal Intergenic	hypomethylated	gene_body	hypomethylated	Shared
Spry1	gene_body	hypomethylated	Distal Intergenic	hypomethylated	Shared
Spry1	gene_body	hypomethylated	gene_body	hypomethylated	Shared
Synpo	gene_body	hypomethylated	gene_body	hypomethylated	Shared
Tbc1d31	gene_body	hypermethylated	gene_body	hypermethylated	Shared
Tmem65	Distal Intergenic	hypomethylated	Distal Intergenic	hypomethylated	Shared
Tmem65	gene_body	hypomethylated	Distal Intergenic	hypomethylated	Shared
Tmem65	promoter	hypomethylated	Distal Intergenic	hypomethylated	Shared
Galm	gene_body	hypomethylated	gene_body	hypomethylated	Shared
Phactr2	gene_body	hypomethylated	gene_body	hypomethylated	Shared
Egln3	gene_body	hypermethylated	gene_body	hypermethylated	Shared
Gtdc1	Distal Intergenic	hypomethylated	gene_body	hypomethylated	Shared
Gtdc1	gene_body	hypomethylated	gene_body	hypomethylated	Shared
Gm10804	gene_body	hypomethylated	gene_body	hypomethylated	Shared
2700097O09Rik	gene_body	hypomethylated	gene_body	hypomethylated	Shared
Nfkbiz	Distal Intergenic	hypomethylated	Distal Intergenic	hypomethylated	Shared
Nfkbiz	gene_body	hypomethylated	Distal Intergenic	hypomethylated	Shared
Ppp2r5c	Distal Intergenic	hypomethylated	Distal Intergenic	hypomethylated	Shared
Ppp2r5c	Distal Intergenic	hypomethylated	gene_body	hypomethylated	Shared
Ppp2r5c	gene_body	hypomethylated	Distal Intergenic	hypomethylated	Shared
Ppp2r5c	gene_body	hypomethylated	gene_body	hypomethylated	Shared
Lmnb1	gene_body	hypomethylated	gene_body	hypomethylated	Shared
Sik3	gene_body	hypomethylated	gene_body	hypomethylated	Shared
Nt5e	gene_body	hypomethylated	gene_body	hypomethylated	Shared
Fbxw11	gene_body	hypomethylated	gene_body	hypomethylated	Shared
Tnrc6a	gene_body	hypomethylated	gene_body	hypomethylated	Shared
Nfil3	gene_body	hypomethylated	Distal Intergenic	hypomethylated	Shared
Nfil3	gene_body	hypomethylated	gene_body	hypomethylated	Shared
Slc25a19	promoter	hypomethylated	Distal Intergenic	hypomethylated	Shared
Slc25a19	promoter	hypomethylated	promoter	hypomethylated	Shared
Ppp4r4	gene_body	hypomethylated	gene_body	hypomethylated	Shared
Cdk6	gene_body	hypomethylated	Distal Intergenic	hypermethylated	undetermined
Cdk6	gene_body	hypomethylated	gene_body	hypomethylated	Shared
Sipa1l2	Distal Intergenic	hypomethylated	Distal Intergenic	hypomethylated	Shared
Lpin1	Distal Intergenic	hypomethylated	Distal Intergenic	hypomethylated	Shared
Lpin1	Distal Intergenic	hypomethylated	gene_body	hypermethylated	undetermined
Serpina12	Distal Intergenic	hypomethylated	0	0	Only Tet
Atxn1	gene_body	hypomethylated	gene_body	hypomethylated	Shared
Tjp2	gene_body	hypomethylated	gene_body	hypomethylated	Shared
Plagl1	Distal Intergenic	hypomethylated	Distal Intergenic	hypomethylated	Shared
Plagl1	Distal Intergenic	hypomethylated	gene_body	hypomethylated	Shared
Plagl1	Distal Intergenic	hypomethylated	promoter	hypomethylated	Shared
Plagl1	gene_body	hypomethylated	Distal Intergenic	hypomethylated	Shared
Plagl1	gene_body	hypomethylated	gene_body	hypomethylated	Shared
Plagl1	gene_body	hypomethylated	promoter	hypomethylated	Shared
Plagl1	promoter	hypomethylated	Distal Intergenic	hypomethylated	Shared
Plagl1	promoter	hypomethylated	gene_body	hypomethylated	Shared
Plagl1	promoter	hypomethylated	promoter	hypomethylated	Shared
Prkch	Distal Intergenic	hypermethylated	Distal Intergenic	hypermethylated	Shared
Prkch	Distal Intergenic	hypermethylated	gene_body	hypomethylated	undetermined
Prkch	gene_body	hypomethylated	Distal Intergenic	hypermethylated	undetermined
Prkch	gene_body	hypomethylated	gene_body	hypomethylated	Shared
Ankrd12	gene_body	hypomethylated	gene_body	hypomethylated	Shared
Mcu	gene_body	hypomethylated	gene_body	hypermethylated	undetermined
Hlcs	gene_body	hypomethylated	gene_body	undetermined	undetermined
Tank	Distal Intergenic	undetermined	Distal Intergenic	undetermined	undetermined
Tank	Distal Intergenic	undetermined	gene_body	hypomethylated	undetermined
Tank	Distal Intergenic	undetermined	promoter	hypomethylated	undetermined
Tank	gene_body	hypomethylated	Distal Intergenic	undetermined	undetermined
Tank	gene_body	hypomethylated	gene_body	hypomethylated	Shared
Tank	gene_body	hypomethylated	promoter	hypomethylated	Shared
Cx3cr1	gene_body	hypomethylated	gene_body	hypomethylated	Shared
Cd82	gene_body	undetermined	0	0	undetermined
Prrc2b	gene_body	hypomethylated	gene_body	hypomethylated	Shared
Trerf1	gene_body	hypomethylated	Distal Intergenic	hypomethylated	Shared
Trerf1	gene_body	hypomethylated	gene_body	hypomethylated	Shared
Arid5b	gene_body	hypomethylated	gene_body	hypomethylated	Shared
Wwox	gene_body	undetermined	gene_body	hypomethylated	undetermined
Pkdcc	Distal Intergenic	hypomethylated	Distal Intergenic	undetermined	undetermined
Atp8b5	gene_body	hypermethylated	gene_body	hypermethylated	Shared
Ankrd46	Distal Intergenic	hypomethylated	Distal Intergenic	hypomethylated	Shared
Ankrd46	Distal Intergenic	hypomethylated	gene_body	hypomethylated	Shared
Ankrd46	gene_body	undetermined	Distal Intergenic	hypomethylated	undetermined
Ankrd46	gene_body	undetermined	gene_body	hypomethylated	undetermined
Nfatc1	gene_body	hypomethylated	gene_body	hypomethylated	Shared
Gnptab	gene_body	hypomethylated	gene_body	hypomethylated	Shared
Icos	Distal Intergenic	hypomethylated	Distal Intergenic	hypomethylated	Shared
Icos	Distal Intergenic	hypomethylated	gene_body	hypomethylated	Shared
Icos	gene_body	hypomethylated	Distal Intergenic	hypomethylated	Shared
Icos	gene_body	hypomethylated	gene_body	hypomethylated	Shared
Map2k3	gene_body	hypomethylated	0	0	Only Tet
Prune2	gene_body	hypomethylated	gene_body	hypomethylated	Shared
Calcoco1	Distal Intergenic	hypermethylated	Distal Intergenic	hypermethylated	Shared
Mdm1	Distal Intergenic	hypermethylated	Distal Intergenic	hypermethylated	Shared
Myo1d	gene_body	hypomethylated	gene_body	hypomethylated	Shared
Bcl2l15	gene_body	hypomethylated	gene_body	hypomethylated	Shared
Ksr2	gene_body	hypomethylated	gene_body	hypomethylated	Shared
Gsx2	Distal Intergenic	hypermethylated	Distal Intergenic	hypermethylated	Shared
Gpr155	gene_body	hypomethylated	gene_body	hypomethylated	Shared
1700027F09Rik	Distal Intergenic	hypermethylated	Distal Intergenic	hypermethylated	Shared
1700027F09Rik	Distal Intergenic	hypermethylated	gene_body	hypomethylated	undetermined
1700027F09Rik	gene_body	hypomethylated	Distal Intergenic	hypermethylated	undetermined
1700027F09Rik	gene_body	hypomethylated	gene_body	hypomethylated	Shared
Ankrd54	Distal Intergenic	hypomethylated	Distal Intergenic	hypomethylated	Shared
Cers4	gene_body	hypomethylated	gene_body	hypomethylated	Shared
Ksr1	gene_body	hypomethylated	gene_body	hypomethylated	Shared
Chrna1	gene_body	hypomethylated	gene_body	hypomethylated	Shared
Specc1l	gene_body	undetermined	gene_body	undetermined	undetermined
Scfd2	gene_body	hypermethylated	gene_body	undetermined	undetermined
Slc25a12	Distal Intergenic	hypermethylated	0	0	Only Tet
Slc7a1	gene_body	undetermined	gene_body	undetermined	undetermined
Cpm	gene_body	hypomethylated	gene_body	hypomethylated	Shared
Rnf157	gene_body	hypomethylated	gene_body	hypomethylated	Shared
Agfg1	Distal Intergenic	hypomethylated	Distal Intergenic	hypomethylated	Shared
Agfg1	Distal Intergenic	hypomethylated	gene_body	hypomethylated	Shared
Agfg1	gene_body	hypomethylated	Distal Intergenic	hypomethylated	Shared
Agfg1	gene_body	hypomethylated	gene_body	hypomethylated	Shared
Tbc1d4	Distal Intergenic	hypomethylated	gene_body	hypomethylated	Shared
Tbc1d4	gene_body	hypomethylated	gene_body	hypomethylated	Shared
Pdcd1	gene_body	hypomethylated	Distal Intergenic	hypomethylated	Shared
Pdcd1	gene_body	hypomethylated	gene_body	hypomethylated	Shared
Pdcd1	gene_body	hypomethylated	promoter	hypomethylated	Shared
Pdcd1	promoter	hypomethylated	Distal Intergenic	hypomethylated	Shared
Pdcd1	promoter	hypomethylated	gene_body	hypomethylated	Shared
Pdcd1	promoter	hypomethylated	promoter	hypomethylated	Shared
Tprg	Distal Intergenic	hypomethylated	Distal Intergenic	hypomethylated	Shared
Vcpkmt	Distal Intergenic	hypomethylated	Distal Intergenic	undetermined	undetermined
Mllt3	Distal Intergenic	hypermethylated	gene_body	hypermethylated	Shared
Mllt3	gene_body	hypermethylated	gene_body	hypermethylated	Shared
Ankrd55	gene_body	hypomethylated	Distal Intergenic	hypomethylated	Shared
Ankrd55	gene_body	hypomethylated	gene_body	hypomethylated	Shared
Raf1	Distal Intergenic	hypermethylated	promoter	hypomethylated	undetermined
Raf1	promoter	hypomethylated	promoter	hypomethylated	Shared
Tnr	gene_body	hypomethylated	gene_body	hypomethylated	Shared
Abr	Distal Intergenic	hypomethylated	gene_body	hypomethylated	Shared
Abr	gene_body	hypomethylated	gene_body	hypomethylated	Shared
Lsm4	Distal Intergenic	hypomethylated	Distal Intergenic	hypomethylated	Shared
Jdp2	gene_body	hypermethylated	gene_body	hypermethylated	Shared
Bub1b	gene_body	hypomethylated	gene_body	hypomethylated	Shared
Rora	gene_body	hypomethylated	gene_body	hypomethylated	Shared
Dhrs3	gene_body	hypermethylated	Distal Intergenic	hypermethylated	Shared
Dhrs3	gene_body	hypermethylated	gene_body	hypermethylated	Shared
Aven	gene_body	hypomethylated	gene_body	hypomethylated	Shared
Csrnp3	Distal Intergenic	hypomethylated	Distal Intergenic	hypomethylated	Shared
Peak1	gene_body	hypermethylated	gene_body	hypermethylated	Shared
Gucd1	gene_body	hypermethylated	gene_body	hypermethylated	Shared
Osbpl8	Distal Intergenic	hypomethylated	gene_body	hypomethylated	Shared
Tg	gene_body	hypomethylated	gene_body	hypomethylated	Shared
Myo1e	gene_body	hypomethylated	gene_body	hypomethylated	Shared
Gem	0	0	Distal Intergenic	hypermethylated	Only TFH
Arhgef3	gene_body	hypomethylated	gene_body	hypomethylated	Shared
Nek7	gene_body	hypomethylated	gene_body	hypomethylated	Shared
6430710C18Rik	Distal Intergenic	hypomethylated	Distal Intergenic	undetermined	undetermined
Nfia	Distal Intergenic	hypermethylated	Distal Intergenic	hypermethylated	Shared
Nfia	Distal Intergenic	hypermethylated	gene_body	hypermethylated	Shared
Nfia	gene_body	hypermethylated	Distal Intergenic	hypermethylated	Shared
Nfia	gene_body	hypermethylated	gene_body	hypermethylated	Shared
Gna13	gene_body	hypomethylated	gene_body	hypomethylated	Shared
Polk	gene_body	hypomethylated	gene_body	hypomethylated	Shared
Ikzf3	gene_body	hypermethylated	gene_body	hypermethylated	Shared
Casp4	0	0	gene_body	hypomethylated	Only TFH
Maml2	gene_body	hypomethylated	gene_body	hypermethylated	undetermined
Tnfsf8	Distal Intergenic	hypomethylated	Distal Intergenic	hypomethylated	Shared
Tnfsf8	Distal Intergenic	hypomethylated	gene_body	hypomethylated	Shared
Tnfsf8	gene_body	hypomethylated	Distal Intergenic	hypomethylated	Shared
Tnfsf8	gene_body	hypomethylated	gene_body	hypomethylated	Shared
Nfkb1	gene_body	hypomethylated	Distal Intergenic	hypomethylated	Shared
Nfkb1	gene_body	hypomethylated	gene_body	hypomethylated	Shared
Atxn7l1	gene_body	hypomethylated	gene_body	hypomethylated	Shared
Gna14	gene_body	hypomethylated	gene_body	hypomethylated	Shared
Ezh2	gene_body	hypomethylated	gene_body	hypomethylated	Shared
Rasl11a	Distal Intergenic	hypomethylated	Distal Intergenic	hypomethylated	Shared
Pbx3	gene_body	undetermined	gene_body	hypermethylated	undetermined
Dusp4	gene_body	hypomethylated	gene_body	hypomethylated	Shared
Lrrc8d	Distal Intergenic	undetermined	Distal Intergenic	undetermined	undetermined
Lrrc8d	Distal Intergenic	undetermined	gene_body	hypomethylated	undetermined
Lrrc8d	gene_body	hypomethylated	Distal Intergenic	undetermined	undetermined
Lrrc8d	gene_body	hypomethylated	gene_body	hypomethylated	Shared
Fer1l6	gene_body	hypomethylated	gene_body	hypomethylated	Shared
Dynll2	gene_body	hypomethylated	Distal Intergenic	hypomethylated	Shared
Dynll2	gene_body	hypomethylated	gene_body	hypomethylated	Shared
Ica1	gene_body	hypomethylated	gene_body	hypomethylated	Shared
Mchr1	gene_body	hypomethylated	gene_body	hypomethylated	Shared
Kif13a	gene_body	hypomethylated	gene_body	hypomethylated	Shared
Slamf6	promoter	hypomethylated	promoter	hypomethylated	Shared
Slc22a15	Distal Intergenic	hypomethylated	Distal Intergenic	hypomethylated	Shared
Slc22a15	Distal Intergenic	hypomethylated	gene_body	hypomethylated	Shared
Slc22a15	gene_body	hypomethylated	Distal Intergenic	hypomethylated	Shared
Slc22a15	gene_body	hypomethylated	gene_body	hypomethylated	Shared
Enpp6	Distal Intergenic	undetermined	Distal Intergenic	undetermined	undetermined
Enpp6	Distal Intergenic	undetermined	gene_body	hypomethylated	undetermined
Enpp6	gene_body	hypomethylated	Distal Intergenic	undetermined	undetermined
Enpp6	gene_body	hypomethylated	gene_body	hypomethylated	Shared
Dclk1	0	0	gene_body	undetermined	undetermined
Rad51b	gene_body	hypomethylated	gene_body	hypomethylated	Shared
Cd200	Distal Intergenic	hypomethylated	gene_body	hypomethylated	Shared
Cd200	gene_body	hypomethylated	gene_body	hypomethylated	Shared
Tox2	Distal Intergenic	hypomethylated	Distal Intergenic	hypomethylated	Shared
Tox2	Distal Intergenic	hypomethylated	gene_body	hypermethylated	undetermined
Tox2	gene_body	hypermethylated	Distal Intergenic	hypomethylated	undetermined
Tox2	gene_body	hypermethylated	gene_body	hypermethylated	Shared
Rnf19a	Distal Intergenic	hypomethylated	Distal Intergenic	hypomethylated	Shared
Rnf19a	Distal Intergenic	hypomethylated	gene_body	hypomethylated	Shared
Rnf19a	gene_body	hypomethylated	Distal Intergenic	hypomethylated	Shared
Rnf19a	gene_body	hypomethylated	gene_body	hypomethylated	Shared
Camk2d	gene_body	hypomethylated	gene_body	hypermethylated	undetermined
Myo3b	gene_body	hypomethylated	gene_body	hypomethylated	Shared
Il2rb	Distal Intergenic	hypomethylated	Distal Intergenic	hypomethylated	Shared
Il2rb	Distal Intergenic	hypomethylated	gene_body	hypomethylated	Shared
Il2rb	gene_body	hypomethylated	Distal Intergenic	hypomethylated	Shared
Il2rb	gene_body	hypomethylated	gene_body	hypomethylated	Shared
Dars	Distal Intergenic	hypomethylated	Distal Intergenic	hypermethylated	undetermined
Msi2	gene_body	hypomethylated	gene_body	hypermethylated	undetermined
Ptk2b	gene_body	undetermined	gene_body	undetermined	undetermined
Zap70	gene_body	hypomethylated	gene_body	hypomethylated	Shared
Gm12610	Distal Intergenic	hypomethylated	0	0	Only Tet
Tnfsf4	Distal Intergenic	hypomethylated	Distal Intergenic	hypomethylated	Shared
Odc1	Distal Intergenic	hypermethylated	0	0	Only Tet
Gfod1	Distal Intergenic	hypomethylated	Distal Intergenic	hypomethylated	Shared
Gfod1	Distal Intergenic	hypomethylated	gene_body	hypomethylated	Shared
Gfod1	gene_body	hypomethylated	Distal Intergenic	hypomethylated	Shared
Gfod1	gene_body	hypomethylated	gene_body	hypomethylated	Shared
Ifitm3	promoter	hypermethylated	gene_body	hypermethylated	Shared
Ndufaf6	0	0	gene_body	hypermethylated	Only TFH
Tiam1	gene_body	undetermined	gene_body	hypermethylated	undetermined
Adprm	gene_body	hypomethylated	gene_body	hypomethylated	Shared
Ccr1	Distal Intergenic	hypomethylated	Distal Intergenic	hypomethylated	Shared
Gpr15	0	0	gene_body	hypomethylated	Only TFH
Rapgef1	gene_body	hypomethylated	gene_body	hypomethylated	Shared
Tatdn1	gene_body	hypermethylated	gene_body	hypermethylated	Shared
Xkr6	gene_body	hypomethylated	0	0	Only Tet
Neil2	promoter	hypomethylated	0	0	Only Tet
Itgav	gene_body	hypomethylated	gene_body	hypomethylated	Shared
AU019990	promoter	hypermethylated	promoter	hypermethylated	Shared
Rab8b	gene_body	hypomethylated	gene_body	hypomethylated	Shared
Hspb7	0	0	gene_body	hypermethylated	Only TFH
Mphosph6	Distal Intergenic	hypomethylated	Distal Intergenic	hypomethylated	Shared
Mphosph6	gene_body	hypomethylated	Distal Intergenic	hypomethylated	Shared
Slco3a1	gene_body	hypomethylated	gene_body	undetermined	undetermined
Hivep2	gene_body	hypomethylated	Distal Intergenic	hypermethylated	undetermined
Hivep2	gene_body	hypomethylated	gene_body	hypomethylated	Shared
Ube2e3	Distal Intergenic	hypomethylated	Distal Intergenic	hypomethylated	Shared
Ube2e3	Distal Intergenic	hypomethylated	gene_body	hypomethylated	Shared
Ube2e3	gene_body	hypomethylated	Distal Intergenic	hypomethylated	Shared
Ube2e3	gene_body	hypomethylated	gene_body	hypomethylated	Shared
Fryl	gene_body	hypomethylated	gene_body	undetermined	undetermined
Tmprss6	gene_body	hypomethylated	0	0	Only Tet
Dleu2	Distal Intergenic	hypomethylated	Distal Intergenic	hypomethylated	Shared
Dleu2	Distal Intergenic	hypomethylated	gene_body	hypomethylated	Shared
Rplp1	Distal Intergenic	hypomethylated	Distal Intergenic	hypomethylated	Shared
Rplp1	Distal Intergenic	hypomethylated	gene_body	hypermethylated	undetermined
Rplp1	gene_body	hypermethylated	Distal Intergenic	hypomethylated	undetermined
Rplp1	gene_body	hypermethylated	gene_body	hypermethylated	Shared
Hmces	0	0	gene_body	hypomethylated	Only TFH
Tnip3	Distal Intergenic	hypomethylated	Distal Intergenic	hypomethylated	Shared
Tnip3	Distal Intergenic	hypomethylated	gene_body	hypomethylated	Shared
Tnip3	gene_body	hypomethylated	Distal Intergenic	hypomethylated	Shared
Tnip3	gene_body	hypomethylated	gene_body	hypomethylated	Shared
Stx6	gene_body	hypomethylated	gene_body	hypomethylated	Shared
Plxnc1	Distal Intergenic	hypomethylated	Distal Intergenic	hypomethylated	Shared
Plxnc1	Distal Intergenic	hypomethylated	gene_body	hypomethylated	Shared
Plxnc1	gene_body	hypomethylated	Distal Intergenic	hypomethylated	Shared
Plxnc1	gene_body	hypomethylated	gene_body	hypomethylated	Shared
Alpk2	gene_body	hypomethylated	gene_body	undetermined	undetermined
Ece1	Distal Intergenic	hypermethylated	Distal Intergenic	hypermethylated	Shared
Ece1	Distal Intergenic	hypermethylated	gene_body	hypermethylated	Shared
Ece1	gene_body	hypermethylated	Distal Intergenic	hypermethylated	Shared
Ece1	gene_body	hypermethylated	gene_body	hypermethylated	Shared
Gypc	Distal Intergenic	hypomethylated	Distal Intergenic	hypomethylated	Shared
Nrip1	Distal Intergenic	hypomethylated	Distal Intergenic	hypomethylated	Shared
Nrip1	Distal Intergenic	hypomethylated	gene_body	hypomethylated	Shared
Nrip1	gene_body	hypomethylated	Distal Intergenic	hypomethylated	Shared
Nrip1	gene_body	hypomethylated	gene_body	hypomethylated	Shared
Slc9a9	Distal Intergenic	hypomethylated	Distal Intergenic	hypomethylated	Shared
Slc9a9	Distal Intergenic	hypomethylated	gene_body	hypermethylated	undetermined
Slc9a9	gene_body	hypermethylated	Distal Intergenic	hypomethylated	undetermined
Slc9a9	gene_body	hypermethylated	gene_body	hypermethylated	Shared
A430093F15Rik	gene_body	hypomethylated	gene_body	hypomethylated	Shared
Atp6v1g3	Distal Intergenic	undetermined	Distal Intergenic	undetermined	undetermined
Atp6v1g3	Distal Intergenic	undetermined	gene_body	hypomethylated	undetermined
Atp6v1g3	gene_body	hypomethylated	Distal Intergenic	undetermined	undetermined
Atp6v1g3	gene_body	hypomethylated	gene_body	hypomethylated	Shared
Ercc6l2	Distal Intergenic	hypomethylated	Distal Intergenic	hypomethylated	Shared
Ercc6l2	Distal Intergenic	hypomethylated	gene_body	hypermethylated	undetermined
Ercc6l2	gene_body	hypermethylated	Distal Intergenic	hypomethylated	undetermined
Ercc6l2	gene_body	hypermethylated	gene_body	hypermethylated	Shared
Nf2	gene_body	hypomethylated	gene_body	hypomethylated	Shared
Auh	gene_body	hypomethylated	gene_body	hypomethylated	Shared
8030474K03Rik	Distal Intergenic	hypomethylated	0	0	Only Tet
Rbpj	Distal Intergenic	hypomethylated	Distal Intergenic	hypomethylated	Shared
Rbpj	Distal Intergenic	hypomethylated	gene_body	hypomethylated	Shared
Rbpj	gene_body	hypomethylated	Distal Intergenic	hypomethylated	Shared
Rbpj	gene_body	hypomethylated	gene_body	hypomethylated	Shared
Smyd3	gene_body	hypomethylated	gene_body	hypomethylated	Shared
Chst2	Distal Intergenic	hypomethylated	Distal Intergenic	hypomethylated	Shared
Chst2	Distal Intergenic	hypomethylated	gene_body	hypermethylated	undetermined
Chst2	gene_body	hypomethylated	Distal Intergenic	hypomethylated	Shared
Chst2	gene_body	hypomethylated	gene_body	hypermethylated	undetermined
Etv6	gene_body	undetermined	gene_body	hypermethylated	undetermined
Rab11fip1	gene_body	undetermined	gene_body	undetermined	undetermined
Farp1	Distal Intergenic	hypomethylated	Distal Intergenic	hypomethylated	Shared
Farp1	Distal Intergenic	hypomethylated	gene_body	hypomethylated	Shared
Farp1	gene_body	hypomethylated	Distal Intergenic	hypomethylated	Shared
Farp1	gene_body	hypomethylated	gene_body	hypomethylated	Shared
Trps1	Distal Intergenic	undetermined	Distal Intergenic	hypomethylated	undetermined
Smad3	gene_body	hypermethylated	gene_body	hypermethylated	Shared
Smad3	promoter	hypermethylated	gene_body	hypermethylated	Shared
Asap1	Distal Intergenic	undetermined	Distal Intergenic	undetermined	undetermined
Asap1	Distal Intergenic	undetermined	gene_body	hypomethylated	undetermined
Asap1	gene_body	hypomethylated	Distal Intergenic	undetermined	undetermined
Asap1	gene_body	hypomethylated	gene_body	hypomethylated	Shared
Socs5	gene_body	hypomethylated	gene_body	hypomethylated	Shared
Hsbp1l1	gene_body	hypomethylated	gene_body	hypomethylated	Shared
Mbnl1	gene_body	hypomethylated	gene_body	hypomethylated	Shared
Gzmk	Distal Intergenic	hypomethylated	Distal Intergenic	hypomethylated	Shared
Adora2a	gene_body	hypermethylated	gene_body	undetermined	undetermined
Rps6ka1	Distal Intergenic	hypermethylated	Distal Intergenic	hypermethylated	Shared
Rps6ka1	Distal Intergenic	hypermethylated	gene_body	hypermethylated	Shared
Rps6ka1	gene_body	hypermethylated	Distal Intergenic	hypermethylated	Shared
Rps6ka1	gene_body	hypermethylated	gene_body	hypermethylated	Shared
Lrig1	Distal Intergenic	hypermethylated	gene_body	hypomethylated	undetermined
Lrig1	gene_body	hypomethylated	gene_body	hypomethylated	Shared
Grhl1	gene_body	hypomethylated	gene_body	hypomethylated	Shared
Adh4	0	0	gene_body	hypomethylated	Only TFH
Irf2bp2	Distal Intergenic	undetermined	Distal Intergenic	hypermethylated	undetermined
Runx2	gene_body	hypomethylated	gene_body	hypermethylated	undetermined
Setbp1	Distal Intergenic	hypomethylated	Distal Intergenic	hypomethylated	Shared
Setbp1	Distal Intergenic	hypomethylated	gene_body	hypomethylated	Shared
Setbp1	gene_body	hypomethylated	Distal Intergenic	hypomethylated	Shared
Setbp1	gene_body	hypomethylated	gene_body	hypomethylated	Shared
Tmem26	Distal Intergenic	hypomethylated	gene_body	hypomethylated	Shared
Tmem26	gene_body	hypomethylated	gene_body	hypomethylated	Shared
Sdcbp2	promoter	hypomethylated	promoter	hypomethylated	Shared
Ppp1r16b	gene_body	hypomethylated	gene_body	hypomethylated	Shared
Dapp1	Distal Intergenic	hypomethylated	Distal Intergenic	hypomethylated	Shared
Dapp1	Distal Intergenic	hypomethylated	gene_body	hypomethylated	Shared
Dapp1	gene_body	hypomethylated	Distal Intergenic	hypomethylated	Shared
Dapp1	gene_body	hypomethylated	gene_body	hypomethylated	Shared
Id2	promoter	hypermethylated	gene_body	hypermethylated	Shared
Utrn	Distal Intergenic	hypomethylated	gene_body	hypermethylated	undetermined
Utrn	gene_body	hypermethylated	gene_body	hypermethylated	Shared
Atp2b1	Distal Intergenic	hypomethylated	Distal Intergenic	hypomethylated	Shared
Atp2b1	Distal Intergenic	hypomethylated	gene_body	hypomethylated	Shared
Atp2b1	gene_body	hypomethylated	Distal Intergenic	hypomethylated	Shared
Atp2b1	gene_body	hypomethylated	gene_body	hypomethylated	Shared
Ldlrad4	gene_body	hypomethylated	gene_body	hypomethylated	Shared
Celf2	gene_body	hypomethylated	0	0	Only Tet
Slc36a3	gene_body	hypomethylated	gene_body	hypomethylated	Shared
Cox7c	Distal Intergenic	hypomethylated	Distal Intergenic	hypermethylated	undetermined
Mstn	0	0	Distal Intergenic	hypomethylated	Only TFH
Prkg1	0	0	Distal Intergenic	hypomethylated	Only TFH
Hdac4	gene_body	undetermined	Distal Intergenic	hypermethylated	undetermined
Hdac4	gene_body	undetermined	gene_body	hypermethylated	undetermined
Amz2	Distal Intergenic	hypomethylated	Distal Intergenic	hypomethylated	Shared
Sorl1	gene_body	hypomethylated	gene_body	hypomethylated	Shared
Tmem192	gene_body	hypermethylated	0	0	Only Tet
Ifng	Distal Intergenic	hypomethylated	Distal Intergenic	undetermined	undetermined
Ifng	Distal Intergenic	hypomethylated	promoter	hypermethylated	undetermined
Ifng	gene_body	hypomethylated	Distal Intergenic	undetermined	undetermined
Ifng	gene_body	hypomethylated	promoter	hypermethylated	undetermined
E130308A19Rik	0	0	gene_body	hypermethylated	Only TFH
1700129C05Rik	Distal Intergenic	hypomethylated	Distal Intergenic	hypomethylated	Shared
1700129C05Rik	Distal Intergenic	hypomethylated	gene_body	hypomethylated	Shared
1700129C05Rik	gene_body	hypomethylated	Distal Intergenic	hypomethylated	Shared
1700129C05Rik	gene_body	hypomethylated	gene_body	hypomethylated	Shared
Itpr1	gene_body	hypomethylated	gene_body	hypomethylated	Shared
Hif1a	gene_body	undetermined	Distal Intergenic	hypermethylated	undetermined
Hif1a	gene_body	undetermined	gene_body	hypomethylated	undetermined
Zbtb1	gene_body	hypomethylated	gene_body	hypomethylated	Shared
Acot7	Distal Intergenic	hypermethylated	Distal Intergenic	hypermethylated	Shared
Acot7	Distal Intergenic	hypermethylated	gene_body	hypermethylated	Shared
Acot7	Distal Intergenic	hypermethylated	promoter	hypermethylated	Shared
Acot7	gene_body	hypermethylated	Distal Intergenic	hypermethylated	Shared
Acot7	gene_body	hypermethylated	gene_body	hypermethylated	Shared
Acot7	gene_body	hypermethylated	promoter	hypermethylated	Shared
Acot7	promoter	hypermethylated	Distal Intergenic	hypermethylated	Shared
Acot7	promoter	hypermethylated	gene_body	hypermethylated	Shared
Acot7	promoter	hypermethylated	promoter	hypermethylated	Shared
Egr2	Distal Intergenic	hypomethylated	Distal Intergenic	hypomethylated	Shared
Egr2	Distal Intergenic	hypomethylated	gene_body	hypomethylated	Shared
Egr2	gene_body	hypermethylated	Distal Intergenic	hypomethylated	undetermined
Egr2	gene_body	hypermethylated	gene_body	hypomethylated	undetermined
Max	Distal Intergenic	hypermethylated	Distal Intergenic	hypermethylated	Shared
Max	Distal Intergenic	hypermethylated	gene_body	hypomethylated	undetermined
Max	gene_body	hypomethylated	Distal Intergenic	hypermethylated	undetermined
Max	gene_body	hypomethylated	gene_body	hypomethylated	Shared
Vdac1	Distal Intergenic	undetermined	Distal Intergenic	undetermined	undetermined
Rtkn2	Distal Intergenic	hypomethylated	Distal Intergenic	hypomethylated	Shared
Rtkn2	Distal Intergenic	hypomethylated	gene_body	hypomethylated	Shared
Rtkn2	gene_body	hypomethylated	Distal Intergenic	hypomethylated	Shared
Rtkn2	gene_body	hypomethylated	gene_body	hypomethylated	Shared
Mmd	gene_body	hypomethylated	gene_body	undetermined	undetermined
Sspn	Distal Intergenic	undetermined	Distal Intergenic	undetermined	undetermined
Mybpc1	gene_body	hypomethylated	gene_body	hypomethylated	Shared
Cpd	gene_body	hypomethylated	Distal Intergenic	hypomethylated	Shared
Fbxw10	gene_body	hypomethylated	0	0	Only Tet
Zc3h12d	gene_body	hypomethylated	gene_body	hypomethylated	Shared
Inpp4b	gene_body	hypomethylated	gene_body	hypomethylated	Shared
Kcnk5	gene_body	hypermethylated	gene_body	hypermethylated	Shared
Ncoa2	gene_body	hypermethylated	gene_body	hypomethylated	undetermined
Tspan14	gene_body	hypomethylated	gene_body	undetermined	undetermined
Slc9b2	promoter	hypomethylated	gene_body	hypomethylated	Shared
1700020N01Rik	Distal Intergenic	hypomethylated	0	0	Only Tet
Heg1	gene_body	hypomethylated	gene_body	hypomethylated	Shared
Heg1	promoter	hypomethylated	gene_body	hypomethylated	Shared
Ipmk	gene_body	hypomethylated	gene_body	hypomethylated	Shared
Cbr4	Distal Intergenic	hypomethylated	Distal Intergenic	hypomethylated	Shared
Cbr4	Distal Intergenic	hypomethylated	gene_body	hypomethylated	Shared
Cbr4	gene_body	hypomethylated	Distal Intergenic	hypomethylated	Shared
Cbr4	gene_body	hypomethylated	gene_body	hypomethylated	Shared
Dnajc5b	Distal Intergenic	hypomethylated	Distal Intergenic	hypomethylated	Shared
Itga4	Distal Intergenic	hypermethylated	Distal Intergenic	hypermethylated	Shared
Itga4	Distal Intergenic	hypermethylated	gene_body	hypomethylated	undetermined
Itga4	gene_body	hypomethylated	Distal Intergenic	hypermethylated	undetermined
Itga4	gene_body	hypomethylated	gene_body	hypomethylated	Shared
Adap1	Distal Intergenic	hypomethylated	Distal Intergenic	hypomethylated	Shared
Adap1	Distal Intergenic	hypomethylated	gene_body	hypomethylated	Shared
Adap1	gene_body	hypomethylated	Distal Intergenic	hypomethylated	Shared
Adap1	gene_body	hypomethylated	gene_body	hypomethylated	Shared
Foxp1	gene_body	hypomethylated	gene_body	hypermethylated	undetermined
Cnot2	gene_body	hypomethylated	gene_body	hypomethylated	Shared
Cd86	gene_body	hypomethylated	gene_body	hypomethylated	Shared
Stat3	Distal Intergenic	hypermethylated	gene_body	hypomethylated	undetermined
Stat3	gene_body	hypomethylated	gene_body	hypomethylated	Shared
Fosb	0	0	gene_body	hypermethylated	Only TFH
Alcam	Distal Intergenic	hypomethylated	Distal Intergenic	hypomethylated	Shared
Alcam	Distal Intergenic	hypomethylated	gene_body	hypermethylated	undetermined
Alcam	gene_body	undetermined	Distal Intergenic	hypomethylated	undetermined
Alcam	gene_body	undetermined	gene_body	hypermethylated	undetermined
Fam107b	gene_body	undetermined	gene_body	hypomethylated	undetermined
Socs3	Distal Intergenic	hypermethylated	0	0	Only Tet
Amd1	Distal Intergenic	hypomethylated	Distal Intergenic	hypomethylated	Shared
Tbl1xr1	Distal Intergenic	hypomethylated	Distal Intergenic	hypomethylated	Shared
Tbl1xr1	gene_body	hypomethylated	Distal Intergenic	hypomethylated	Shared
Csf1	Distal Intergenic	hypomethylated	0	0	Only Tet
Itpkb	gene_body	hypomethylated	gene_body	hypermethylated	undetermined
Kmt2a	gene_body	hypomethylated	Distal Intergenic	hypomethylated	Shared
Lag3	gene_body	hypomethylated	Distal Intergenic	hypermethylated	undetermined
Lag3	gene_body	hypomethylated	gene_body	hypomethylated	Shared
Lag3	promoter	hypomethylated	Distal Intergenic	hypermethylated	undetermined
Lag3	promoter	hypomethylated	gene_body	hypomethylated	Shared
Reps1	gene_body	hypermethylated	gene_body	hypomethylated	undetermined
Malt1	gene_body	hypomethylated	gene_body	hypomethylated	Shared
1700061F12Rik	Distal Intergenic	hypomethylated	Distal Intergenic	hypomethylated	Shared
1700061F12Rik	Distal Intergenic	hypomethylated	gene_body	hypomethylated	Shared
Kdm7a	Distal Intergenic	hypomethylated	0	0	Only Tet
Dock8	Distal Intergenic	hypomethylated	Distal Intergenic	hypomethylated	Shared
Dock8	Distal Intergenic	hypomethylated	gene_body	hypomethylated	Shared
Dock8	gene_body	hypomethylated	Distal Intergenic	hypomethylated	Shared
Dock8	gene_body	hypomethylated	gene_body	hypomethylated	Shared
S100a10	Distal Intergenic	hypomethylated	Distal Intergenic	hypomethylated	Shared
Ptger4	Distal Intergenic	hypomethylated	gene_body	hypermethylated	undetermined
Ptger4	gene_body	hypomethylated	gene_body	hypermethylated	undetermined
Pgap1	gene_body	hypomethylated	gene_body	hypermethylated	undetermined
Hivep1	gene_body	undetermined	gene_body	hypermethylated	undetermined
Ehbp1l1	gene_body	hypomethylated	0	0	Only Tet
Btg1	Distal Intergenic	hypomethylated	Distal Intergenic	undetermined	undetermined
Btg1	Distal Intergenic	hypomethylated	gene_body	undetermined	undetermined
Btg1	gene_body	undetermined	Distal Intergenic	undetermined	undetermined
Btg1	gene_body	undetermined	gene_body	undetermined	undetermined
Aebp2	Distal Intergenic	hypermethylated	Distal Intergenic	hypermethylated	Shared
Aebp2	Distal Intergenic	hypermethylated	gene_body	hypomethylated	undetermined
Aebp2	Distal Intergenic	hypermethylated	promoter	hypomethylated	undetermined
Aebp2	gene_body	hypomethylated	Distal Intergenic	hypermethylated	undetermined
Aebp2	gene_body	hypomethylated	gene_body	hypomethylated	Shared
Aebp2	gene_body	hypomethylated	promoter	hypomethylated	Shared
Aebp2	promoter	hypomethylated	Distal Intergenic	hypermethylated	undetermined
Aebp2	promoter	hypomethylated	gene_body	hypomethylated	Shared
Aebp2	promoter	hypomethylated	promoter	hypomethylated	Shared
Tbx21	Distal Intergenic	hypomethylated	gene_body	hypomethylated	Shared
Tbx21	gene_body	hypomethylated	gene_body	hypomethylated	Shared
Pear1	Distal Intergenic	hypomethylated	0	0	Only Tet
Arhgap31	gene_body	hypomethylated	gene_body	hypermethylated	undetermined
Bach2	Distal Intergenic	undetermined	Distal Intergenic	hypermethylated	undetermined
Bach2	Distal Intergenic	undetermined	gene_body	hypermethylated	undetermined
Bach2	Distal Intergenic	undetermined	promoter	hypermethylated	undetermined
Bach2	gene_body	hypermethylated	Distal Intergenic	hypermethylated	Shared
Bach2	gene_body	hypermethylated	gene_body	hypermethylated	Shared
Bach2	gene_body	hypermethylated	promoter	hypermethylated	Shared
Bach2	promoter	hypermethylated	Distal Intergenic	hypermethylated	Shared
Bach2	promoter	hypermethylated	gene_body	hypermethylated	Shared
Bach2	promoter	hypermethylated	promoter	hypermethylated	Shared
Map3k7	Distal Intergenic	hypermethylated	Distal Intergenic	hypermethylated	Shared
Map3k7	Distal Intergenic	hypermethylated	gene_body	hypermethylated	Shared
Mfap5	gene_body	hypomethylated	gene_body	hypomethylated	Shared
Car5b	gene_body	hypomethylated	gene_body	hypomethylated	Shared
Gm16998	gene_body	undetermined	gene_body	hypermethylated	undetermined
Fgd6	gene_body	hypomethylated	0	0	Only Tet
Rps29	gene_body	hypomethylated	0	0	Only Tet
Rap1b	Distal Intergenic	hypomethylated	Distal Intergenic	undetermined	undetermined
Nek6	gene_body	hypermethylated	gene_body	hypermethylated	Shared
Dlg2	gene_body	hypomethylated	0	0	Only Tet
Scaf4	gene_body	hypomethylated	gene_body	hypomethylated	Shared
Ostf1	gene_body	hypomethylated	gene_body	hypomethylated	Shared
Mdfic	Distal Intergenic	hypomethylated	Distal Intergenic	hypomethylated	Shared
Mdfic	Distal Intergenic	hypomethylated	gene_body	hypomethylated	Shared
Mdfic	gene_body	hypomethylated	Distal Intergenic	hypomethylated	Shared
Mdfic	gene_body	hypomethylated	gene_body	hypomethylated	Shared
Stim2	gene_body	hypomethylated	gene_body	hypomethylated	Shared
Zfp831	Distal Intergenic	hypomethylated	Distal Intergenic	hypomethylated	Shared
Vangl2	Distal Intergenic	hypomethylated	Distal Intergenic	hypomethylated	Shared
Psma6	gene_body	hypomethylated	gene_body	undetermined	undetermined
Rtn3	gene_body	hypomethylated	gene_body	hypomethylated	Shared
Npas2	gene_body	hypomethylated	gene_body	hypomethylated	Shared
Zbtb32	0	0	gene_body	hypomethylated	Only TFH
Dusp14	Distal Intergenic	hypomethylated	Distal Intergenic	hypomethylated	Shared
Dusp14	Distal Intergenic	hypomethylated	gene_body	hypomethylated	Shared
Dusp14	gene_body	hypomethylated	Distal Intergenic	hypomethylated	Shared
Dusp14	gene_body	hypomethylated	gene_body	hypomethylated	Shared
Rpa2	gene_body	undetermined	gene_body	hypermethylated	undetermined
Susd1	gene_body	hypermethylated	gene_body	hypermethylated	Shared
Susd1	gene_body	hypermethylated	promoter	hypermethylated	Shared
Arhgap15	gene_body	hypomethylated	0	0	Only Tet
Atf7ip	Distal Intergenic	hypomethylated	Distal Intergenic	hypomethylated	Shared
Atf7ip	gene_body	hypomethylated	Distal Intergenic	hypomethylated	Shared
Fam53b	gene_body	hypomethylated	gene_body	hypomethylated	Shared
Rreb1	gene_body	hypermethylated	gene_body	hypermethylated	Shared
Pde4b	0	0	gene_body	hypermethylated	Only TFH
Nrn1	gene_body	hypomethylated	gene_body	hypomethylated	Shared
Elk3	gene_body	hypomethylated	gene_body	hypomethylated	Shared
Casp3	gene_body	hypomethylated	gene_body	hypomethylated	Shared
Ttc39b	Distal Intergenic	hypermethylated	Distal Intergenic	hypermethylated	Shared
Ttc39b	Distal Intergenic	hypermethylated	gene_body	hypermethylated	Shared
Ttc39b	gene_body	hypermethylated	Distal Intergenic	hypermethylated	Shared
Ttc39b	gene_body	hypermethylated	gene_body	hypermethylated	Shared
Hvcn1	Distal Intergenic	hypermethylated	gene_body	hypomethylated	undetermined
Hvcn1	gene_body	hypomethylated	gene_body	hypomethylated	Shared
Arf6	Distal Intergenic	hypomethylated	Distal Intergenic	hypomethylated	Shared
Arf6	Distal Intergenic	hypomethylated	gene_body	hypomethylated	Shared
Arf6	gene_body	hypomethylated	Distal Intergenic	hypomethylated	Shared
Arf6	gene_body	hypomethylated	gene_body	hypomethylated	Shared
Gpr68	gene_body	hypomethylated	gene_body	hypomethylated	Shared
Adcy7	gene_body	hypomethylated	Distal Intergenic	hypomethylated	Shared
Adcy7	gene_body	hypomethylated	gene_body	hypomethylated	Shared
Gm27162	Distal Intergenic	undetermined	Distal Intergenic	undetermined	undetermined
Gm27162	Distal Intergenic	undetermined	gene_body	hypermethylated	undetermined
Gm27162	Distal Intergenic	undetermined	promoter	hypermethylated	undetermined
Gm27162	gene_body	hypermethylated	Distal Intergenic	undetermined	undetermined
Gm27162	gene_body	hypermethylated	gene_body	hypermethylated	Shared
Gm27162	gene_body	hypermethylated	promoter	hypermethylated	Shared
F13a1	Distal Intergenic	undetermined	Distal Intergenic	hypomethylated	undetermined
F13a1	Distal Intergenic	undetermined	gene_body	hypomethylated	undetermined
F13a1	gene_body	hypomethylated	Distal Intergenic	hypomethylated	Shared
F13a1	gene_body	hypomethylated	gene_body	hypomethylated	Shared
Fam76b	Distal Intergenic	hypomethylated	Distal Intergenic	hypomethylated	Shared
Fam76b	Distal Intergenic	hypomethylated	gene_body	hypomethylated	Shared
Fam76b	gene_body	hypomethylated	Distal Intergenic	hypomethylated	Shared
Fam76b	gene_body	hypomethylated	gene_body	hypomethylated	Shared
Pip4k2a	gene_body	hypomethylated	gene_body	hypermethylated	undetermined
Abcc4	gene_body	hypomethylated	gene_body	hypermethylated	undetermined
