# Supplementary material for: T-follicular helper cells are epigenetically poised to transdifferentiate into T-regulatory type 1 cells
Source: eLife. 2024 Nov 22;13:RP97665. doi: 10.7554/eLife.97665 (PMC11584177; doi:10.7554/eLife.97665)
Supplement: Figure 5—source data 1. [file elife-97665-fig5-data1.xlsx]

## Sheet: UPREGULATED Tet vs TFH
assay

## Sheet: DOWNREGULATED Tet vs TFH
assay
