# Supplementary material for: T-follicular helper cells are epigenetically poised to transdifferentiate into T-regulatory type 1 cells
Source: eLife. 2024 Nov 22;13:RP97665. doi: 10.7554/eLife.97665 (PMC11584177; doi:10.7554/eLife.97665)
Supplement: Figure 6—source data 1. [file elife-97665-fig6-data1.xlsx]

## Sheet: Tet
seqnames	start	end	width	strand	annotation	geneChr	geneStart	geneEnd	geneLength	geneStrand	geneId	distanceToTSS	ENSEMBL	SYMBOL	GENENAME	flank_geneIds	flank_gene_distances	type	Region.ID	gene	sampletype
chr1	4858261	4858413	153	*	Promoter (<=1kb)	1	4857814	4897909	40096	1	21399	447	ENSMUSG00000033813	Tcea1	transcription elongation factor A (SII) 1	18777;21399	0;0	gene_body	chr1:4858261-4858413	Tcea1	Tet
chr1	7709271	7709544	274	*	Distal Intergenic	1	7088920	7173628	84709	1	319263	620351	ENSMUSG00000051285	Pcmtd1	protein-L-isoaspartate (D-aspartate) O-methyltransferase domain containing 1			Distal Intergenic	chr1:7709271-7709544	Pcmtd1	Tet
chr1	10232162	10232390	229	*	Promoter (<=1kb)	1	10137571	10232670	95100	2	211673	280	ENSMUSG00000067851	Arfgef1	ADP-ribosylation factor guanine nucleotide-exchange factor 1(brefeldin A-inhibited)	211673	0	gene_body	chr1:10232162-10232390	Arfgef1	Tet
chr1	13155423	13155726	304	*	Intron (ENSMUST00000081713.10/17978, intron 15 of 21)	1	13113457	13127163	13707	2	383491	-28260	ENSMUSG00000042414	Prdm14	PR domain containing 14	17978;383491	0;-28260	gene_body	chr1:13155423-13155726	Prdm14	Tet
chr1	13161437	13161708	272	*	Intron (ENSMUST00000081713.10/17978, intron 13 of 21)	1	13113457	13127163	13707	2	383491	-34274	ENSMUSG00000042414	Prdm14	PR domain containing 14	17978;383491	0;-34274	gene_body	chr1:13161437-13161708	Prdm14	Tet
chr1	13162286	13162757	472	*	Exon (ENSMUST00000081713.10/17978, exon 13 of 22)	1	13113457	13127163	13707	2	383491	-35123	ENSMUSG00000042414	Prdm14	PR domain containing 14	17978;383491	0;-35123	gene_body	chr1:13162286-13162757	Prdm14	Tet
chr1	13267230	13267769	540	*	Intron (ENSMUST00000081713.10/17978, intron 2 of 21)	1	13139105	13374083	234979	2	17978	106314	ENSMUSG00000005886	Ncoa2	nuclear receptor coactivator 2	17978	0	gene_body	chr1:13267230-13267769	Ncoa2	Tet
chr1	13268513	13268737	225	*	Intron (ENSMUST00000081713.10/17978, intron 2 of 21)	1	13139105	13374083	234979	2	17978	105346	ENSMUSG00000005886	Ncoa2	nuclear receptor coactivator 2	17978	0	gene_body	chr1:13268513-13268737	Ncoa2	Tet
chr1	13268462	13268611	150	*	Intron (ENSMUST00000081713.10/17978, intron 2 of 21)	1	13139105	13374083	234979	2	17978	105472	ENSMUSG00000005886	Ncoa2	nuclear receptor coactivator 2	17978	0	gene_body	chr1:13268462-13268611	Ncoa2	Tet
chr1	13383496	13383860	365	*	Intron (ENSMUST00000185813.1/ENSMUST00000185813.1, intron 1 of 1)	1	13139105	13374083	234979	2	17978	-9413	ENSMUSG00000005886	Ncoa2	nuclear receptor coactivator 2	17978	0	gene_body	chr1:13383496-13383860	Ncoa2	Tet
chr1	13383590	13383781	192	*	Intron (ENSMUST00000185813.1/ENSMUST00000185813.1, intron 1 of 1)	1	13139105	13374083	234979	2	17978	-9507	ENSMUSG00000005886	Ncoa2	nuclear receptor coactivator 2	17978	0	gene_body	chr1:13383590-13383781	Ncoa2	Tet
chr1	13426746	13427378	633	*	Distal Intergenic	1	13139105	13374083	234979	2	17978	-52663	ENSMUSG00000005886	Ncoa2	nuclear receptor coactivator 2			Distal Intergenic	chr1:13426746-13427378	Ncoa2	Tet
chr1	13426916	13427155	240	*	Distal Intergenic	1	13139105	13374083	234979	2	17978	-52833	ENSMUSG00000005886	Ncoa2	nuclear receptor coactivator 2			Distal Intergenic	chr1:13426916-13427155	Ncoa2	Tet
chr1	13513914	13514081	168	*	Distal Intergenic	1	13564698	13589910	25213	2	72265	75829	ENSMUSG00000025935	Tram1	translocating chain-associating membrane protein 1			Distal Intergenic	chr1:13513914-13514081	Tram1	Tet
chr1	13589285	13589434	150	*	Promoter (<=1kb)	1	13564698	13589910	25213	2	72265	476	ENSMUSG00000025935	Tram1	translocating chain-associating membrane protein 1	212442;72265	71112;0	gene_body	chr1:13589285-13589434	Tram1	Tet
chr1	16177599	16177896	298	*	Distal Intergenic	1	16105774	16133734	27961	1	98711	71825	ENSMUSG00000025921	Rdh10	retinol dehydrogenase 10 (all-trans)	98711	71825	Distal Intergenic	chr1:16177599-16177896	Rdh10	Tet
chr1	16747479	16747628	150	*	Distal Intergenic	1	16688051	16709611	21561	1	17087	59428	ENSMUSG00000025779	Ly96	lymphocyte antigen 96	17087	59428	Distal Intergenic	chr1:16747479-16747628	Ly96	Tet
chr1	20260046	20260211	166	*	Intron (ENSMUST00000088448.11/241035, intron 52 of 66)	1	20356452	20392300	35849	1	75028	-96241	ENSMUSG00000089914	4930486I03Rik	RIKEN cDNA 4930486I03 gene	241035	0	gene_body	chr1:20260046-20260211	4930486I03Rik	Tet
chr1	20912745	20912923	179	*	Intron (ENSMUST00000189400.6/74229, intron 1 of 2)	1	20890606	20939650	49045	1	74229	22139	ENSMUSG00000025931	Paqr8	progestin and adipoQ receptor family member VIII	71877;74229;77741	-38703;0;-22272	gene_body	chr1:20912745-20912923	Paqr8	Tet
chr1	23302199	23302476	278	*	Distal Intergenic	1	23291537	23291935	399	1	723964	10662	ENSMUSG00000065567	Mir30c-2	microRNA 30c-2	387225;723964	29930;10662	Distal Intergenic	chr1:23302199-23302476	Mir30c-2	Tet
chr1	23915624	23915950	327	*	Intron (ENSMUST00000027339.13/98366, intron 1 of 9)	1	23844846	23922317	77472	2	98366	6367	ENSMUSG00000026155	Smap1	small ArfGAP 1	98366	0	gene_body	chr1:23915624-23915950	Smap1	Tet
chr1	23915669	23915932	264	*	Intron (ENSMUST00000027339.13/98366, intron 1 of 9)	1	23844846	23922317	77472	2	98366	6385	ENSMUSG00000026155	Smap1	small ArfGAP 1	98366	0	gene_body	chr1:23915669-23915932	Smap1	Tet
chr1	23921670	23921859	190	*	Promoter (<=1kb)	1	23844846	23922317	77472	2	98366	458	ENSMUSG00000026155	Smap1	small ArfGAP 1	98366	0	gene_body	chr1:23921670-23921859	Smap1	Tet
chr1	23921840	23922035	196	*	Promoter (<=1kb)	1	23844846	23922317	77472	2	98366	282	ENSMUSG00000026155	Smap1	small ArfGAP 1	98366	0	gene_body	chr1:23921840-23922035	Smap1	Tet
chr1	24684008	24684324	317	*	Intron (ENSMUST00000191471.6/68421, intron 1 of 15)	1	24678630	24766301	87672	1	68421	5378	ENSMUSG00000073725	Lmbrd1	LMBR1 domain containing 1	68421	0	gene_body	chr1:24684008-24684324	Lmbrd1	Tet
chr1	24684003	24684308	306	*	Intron (ENSMUST00000191471.6/68421, intron 1 of 15)	1	24678630	24766301	87672	1	68421	5373	ENSMUSG00000073725	Lmbrd1	LMBR1 domain containing 1	68421	0	gene_body	chr1:24684003-24684308	Lmbrd1	Tet
chr1	24684015	24684326	312	*	Intron (ENSMUST00000191471.6/68421, intron 1 of 15)	1	24678630	24766301	87672	1	68421	5385	ENSMUSG00000073725	Lmbrd1	LMBR1 domain containing 1	68421	0	gene_body	chr1:24684015-24684326	Lmbrd1	Tet
chr1	24684015	24684326	312	*	Intron (ENSMUST00000191471.6/68421, intron 1 of 15)	1	24678630	24766301	87672	1	68421	5385	ENSMUSG00000073725	Lmbrd1	LMBR1 domain containing 1	68421	0	gene_body	chr1:24684015-24684326	Lmbrd1	Tet
chr1	25015470	25015619	150	*	Distal Intergenic	1	25276404	25277954	1551	2	100504323	262335	ENSMUSG00000104257	Gm20172	predicted gene, 20172			Distal Intergenic	chr1:25015470-25015619	Gm20172	Tet
chr1	33630968	33631122	155	*	Intron (ENSMUST00000027312.10/19076, intron 5 of 13)	1	33453810	33669795	215986	2	19076	38673	ENSMUSG00000026134	Prim2	DNA primase, p58 subunit	19076;67503	0;-38702	gene_body	chr1:33630968-33631122	Prim2	Tet
chr1	33630979	33631133	155	*	Intron (ENSMUST00000027312.10/19076, intron 5 of 13)	1	33453810	33669795	215986	2	19076	38662	ENSMUSG00000026134	Prim2	DNA primase, p58 subunit	19076;67503	0;-38691	gene_body	chr1:33630979-33631133	Prim2	Tet
chr1	34028721	34029077	357	*	Intron (ENSMUST00000183034.4/13518, intron 4 of 102)	1	34117359	34117431	73	1	102466987	-88282	ENSMUSG00000105982	Mir6896	microRNA 6896	13518	0	gene_body	chr1:34028721-34029077	Mir6896	Tet
chr1	34490362	34490609	248	*	Distal Intergenic	1	34498410	34503063	4654	1	21755	-7801	ENSMUSG00000026125	Prss39	protease, serine 39	12627;19253;21755;27993	-45039;30597;-7801;50511	Distal Intergenic	chr1:34490362-34490609	Prss39	Tet
chr1	34510573	34510885	313	*	Distal Intergenic	1	34498410	34503063	4654	1	21755	12163	ENSMUSG00000026125	Prss39	protease, serine 39	12627;19253;21755;21756	-24763;50808;12163;50058	Distal Intergenic	chr1:34510573-34510885	Prss39	Tet
chr1	34802054	34802248	195	*	Intron (ENSMUST00000159747.8/226970, intron 5 of 13)	1	34813219	34843065	29847	2	214469	40817	ENSMUSG00000037503	Fam168b	family with sequence similarity 168, member B	214469;226970;226971	0;0;0	gene_body	chr1:34802054-34802248	Fam168b	Tet
chr1	34802382	34802560	179	*	Intron (ENSMUST00000159747.8/226970, intron 5 of 13)	1	34813219	34843065	29847	2	214469	40505	ENSMUSG00000037503	Fam168b	family with sequence similarity 168, member B	214469;226970;226971	0;0;0	gene_body	chr1:34802382-34802560	Fam168b	Tet
chr1	34831448	34831718	271	*	Intron (ENSMUST00000167518.7/214469, intron 2 of 7)	1	34813219	34843065	29847	2	214469	11347	ENSMUSG00000037503	Fam168b	family with sequence similarity 168, member B	214469;226970;226971	0;0;0	gene_body	chr1:34831448-34831718	Fam168b	Tet
chr1	34831455	34831625	171	*	Intron (ENSMUST00000167518.7/214469, intron 2 of 7)	1	34813219	34843065	29847	2	214469	11440	ENSMUSG00000037503	Fam168b	family with sequence similarity 168, member B	214469;226970;226971	0;0;0	gene_body	chr1:34831455-34831625	Fam168b	Tet
chr1	34852507	34852825	319	*	Intron (ENSMUST00000156687.7/226971, intron 1 of 6)	1	34849976	34879580	29605	1	226971	2531	ENSMUSG00000026123	Plekhb2	pleckstrin homology domain containing, family B (evectins) member 2	214469;226970;226971	0;0;0	gene_body	chr1:34852507-34852825	Plekhb2	Tet
chr1	35580511	35580712	202	*	Distal Intergenic	1	36068400	36106446	38047	1	50785	-487688	ENSMUSG00000045216	Hs6st1	heparan sulfate 6-O-sulfotransferase 1			Distal Intergenic	chr1:35580511-35580712	Hs6st1	Tet
chr1	35653374	35653540	167	*	Distal Intergenic	1	36068400	36106446	38047	1	50785	-414860	ENSMUSG00000045216	Hs6st1	heparan sulfate 6-O-sulfotransferase 1			Distal Intergenic	chr1:35653374-35653540	Hs6st1	Tet
chr1	35653381	35653583	203	*	Distal Intergenic	1	36068400	36106446	38047	1	50785	-414817	ENSMUSG00000045216	Hs6st1	heparan sulfate 6-O-sulfotransferase 1			Distal Intergenic	chr1:35653381-35653583	Hs6st1	Tet
chr1	36064927	36065216	290	*	Distal Intergenic	1	36068400	36106446	38047	1	50785	-3184	ENSMUSG00000045216	Hs6st1	heparan sulfate 6-O-sulfotransferase 1	50785	-3184	Distal Intergenic	chr1:36064927-36065216	Hs6st1	Tet
chr1	36065000	36065149	150	*	Distal Intergenic	1	36068400	36106446	38047	1	50785	-3251	ENSMUSG00000045216	Hs6st1	heparan sulfate 6-O-sulfotransferase 1	50785	-3251	Distal Intergenic	chr1:36065000-36065149	Hs6st1	Tet
chr1	36160270	36160603	334	*	Intron (ENSMUST00000046875.13/320011, intron 31 of 40)	1	36144252	36144313	62	2	102465540	-15957	ENSMUSG00000098752	Mir6897	microRNA 6897	102465540;320011	-15957;0	gene_body	chr1:36160270-36160603	Mir6897	Tet
chr1	36160330	36160514	185	*	Intron (ENSMUST00000046875.13/320011, intron 31 of 40)	1	36144252	36144313	62	2	102465540	-16017	ENSMUSG00000098752	Mir6897	microRNA 6897	102465540;320011	-16017;0	gene_body	chr1:36160330-36160514	Mir6897	Tet
chr1	36160390	36160539	150	*	Intron (ENSMUST00000046875.13/320011, intron 31 of 40)	1	36144252	36144313	62	2	102465540	-16077	ENSMUSG00000098752	Mir6897	microRNA 6897	102465540;320011	-16077;0	gene_body	chr1:36160390-36160539	Mir6897	Tet
chr1	36262172	36262432	261	*	Distal Intergenic	1	36264597	36274679	10083	2	214854	12247	ENSMUSG00000047180	Neurl3	neuralized E3 ubiquitin protein ligase 3	214854;214855;320011	0;0;0	Distal Intergenic	chr1:36262172-36262432	Neurl3	Tet
chr1	36264141	36264523	383	*	Distal Intergenic	1	36264597	36274679	10083	2	214854	10156	ENSMUSG00000047180	Neurl3	neuralized E3 ubiquitin protein ligase 3	214854;214855;320011	0;0;0	Distal Intergenic	chr1:36264141-36264523	Neurl3	Tet
chr1	36264187	36264480	294	*	Distal Intergenic	1	36264597	36274679	10083	2	214854	10199	ENSMUSG00000047180	Neurl3	neuralized E3 ubiquitin protein ligase 3	214854;214855;320011	0;0;0	Distal Intergenic	chr1:36264187-36264480	Neurl3	Tet
chr1	36264287	36264460	174	*	Distal Intergenic	1	36264597	36274679	10083	2	214854	10219	ENSMUSG00000047180	Neurl3	neuralized E3 ubiquitin protein ligase 3	214854;214855;320011	0;0;0	Distal Intergenic	chr1:36264287-36264460	Neurl3	Tet
chr1	36264243	36264467	225	*	Distal Intergenic	1	36264597	36274679	10083	2	214854	10212	ENSMUSG00000047180	Neurl3	neuralized E3 ubiquitin protein ligase 3	214854;214855;320011	0;0;0	Distal Intergenic	chr1:36264243-36264467	Neurl3	Tet
chr1	36272631	36272849	219	*	Promoter (1-2kb)	1	36264597	36274679	10083	2	214854	1830	ENSMUSG00000047180	Neurl3	neuralized E3 ubiquitin protein ligase 3	214854;214855;320011	0;0;0	gene_body	chr1:36272631-36272849	Neurl3	Tet
chr1	36281961	36282110	150	*	Distal Intergenic	1	36264597	36274679	10083	2	214854	-7282	ENSMUSG00000047180	Neurl3	neuralized E3 ubiquitin protein ligase 3	214854;214855;320011	0;0;0	Distal Intergenic	chr1:36281961-36282110	Neurl3	Tet
chr1	36287342	36287986	645	*	Distal Intergenic	1	36264597	36274679	10083	2	214854	-12663	ENSMUSG00000047180	Neurl3	neuralized E3 ubiquitin protein ligase 3	214854;214855;226976;320011	0;0;81195;0	Distal Intergenic	chr1:36287342-36287986	Neurl3	Tet
chr1	36287455	36288021	567	*	Distal Intergenic	1	36264597	36274679	10083	2	214854	-12776	ENSMUSG00000047180	Neurl3	neuralized E3 ubiquitin protein ligase 3	214854;214855;226976;320011	0;0;81160;0	Distal Intergenic	chr1:36287455-36288021	Neurl3	Tet
chr1	36287560	36287900	341	*	Distal Intergenic	1	36264597	36274679	10083	2	214854	-12881	ENSMUSG00000047180	Neurl3	neuralized E3 ubiquitin protein ligase 3	214854;214855;226976;320011	0;0;81281;0	Distal Intergenic	chr1:36287560-36287900	Neurl3	Tet
chr1	36294488	36294732	245	*	Distal Intergenic	1	36307733	36324029	16297	1	214855	-13001	ENSMUSG00000037447	Arid5a	AT rich interactive domain 5A (MRF1-like)	214854;214855;226976	0;0;74449	Distal Intergenic	chr1:36294488-36294732	Arid5a	Tet
chr1	36296598	36296847	250	*	Distal Intergenic	1	36307733	36324029	16297	1	214855	-10886	ENSMUSG00000037447	Arid5a	AT rich interactive domain 5A (MRF1-like)	214854;214855;226976	0;0;72334	Distal Intergenic	chr1:36296598-36296847	Arid5a	Tet
chr1	36309585	36309951	367	*	Promoter (1-2kb)	1	36307733	36324029	16297	1	214855	1852	ENSMUSG00000037447	Arid5a	AT rich interactive domain 5A (MRF1-like)	102465541;214854;214855;226976	38807;0;0;59230	gene_body	chr1:36309585-36309951	Arid5a	Tet
chr1	36309609	36309908	300	*	Promoter (1-2kb)	1	36307733	36324029	16297	1	214855	1876	ENSMUSG00000037447	Arid5a	AT rich interactive domain 5A (MRF1-like)	102465541;214854;214855;226976	38850;0;0;59273	gene_body	chr1:36309609-36309908	Arid5a	Tet
chr1	36646361	36646665	305	*	Intron (ENSMUST00000170295.7/381337, intron 3 of 14)	1	36562692	36683183	120492	2	381337	36518	ENSMUSG00000046337	Fam178b	family with sequence similarity 178, member B	12859;381337	-44784;0	gene_body	chr1:36646361-36646665	Fam178b	Tet
chr1	36723231	36723548	318	*	Exon (ENSMUST00000192873.2/71166, exon 3 of 5)	1	36698114	36714422	16309	2	226977	-8809	ENSMUSG00000037351	Actr1b	ARP1 actin-related protein 1B, centractin beta	12859;22637;226977;381337;71166	31782;-38250;-8809;0;0	gene_body	chr1:36723231-36723548	Actr1b	Tet
chr1	36723212	36723627	416	*	Exon (ENSMUST00000192873.2/71166, exon 3 of 5)	1	36698114	36714422	16309	2	226977	-8790	ENSMUSG00000037351	Actr1b	ARP1 actin-related protein 1B, centractin beta	12859;22637;226977;381337;71166	31763;-38171;-8790;0;0	gene_body	chr1:36723212-36723627	Actr1b	Tet
chr1	36910532	36910689	158	*	Intron (ENSMUST00000027290.11/56030, intron 1 of 40)	1	36792191	36943666	151476	2	56030	32977	ENSMUSG00000026116	Tmem131	transmembrane protein 131	56030	0	gene_body	chr1:36910532-36910689	Tmem131	Tet
chr1	36919876	36920040	165	*	Intron (ENSMUST00000027290.11/56030, intron 1 of 40)	1	36792191	36943666	151476	2	56030	23626	ENSMUSG00000026116	Tmem131	transmembrane protein 131	56030	0	gene_body	chr1:36919876-36920040	Tmem131	Tet
chr1	36920281	36920851	571	*	Intron (ENSMUST00000027290.11/56030, intron 1 of 40)	1	36792191	36943666	151476	2	56030	22815	ENSMUSG00000026116	Tmem131	transmembrane protein 131	56030	0	gene_body	chr1:36920281-36920851	Tmem131	Tet
chr1	36919845	36920027	183	*	Intron (ENSMUST00000027290.11/56030, intron 1 of 40)	1	36792191	36943666	151476	2	56030	23639	ENSMUSG00000026116	Tmem131	transmembrane protein 131	56030	0	gene_body	chr1:36919845-36920027	Tmem131	Tet
chr1	36920366	36920827	462	*	Intron (ENSMUST00000027290.11/56030, intron 1 of 40)	1	36792191	36943666	151476	2	56030	22839	ENSMUSG00000026116	Tmem131	transmembrane protein 131	56030	0	gene_body	chr1:36920366-36920827	Tmem131	Tet
chr1	36920372	36920694	323	*	Intron (ENSMUST00000027290.11/56030, intron 1 of 40)	1	36792191	36943666	151476	2	56030	22972	ENSMUSG00000026116	Tmem131	transmembrane protein 131	56030	0	gene_body	chr1:36920372-36920694	Tmem131	Tet
chr1	36920414	36920841	428	*	Intron (ENSMUST00000027290.11/56030, intron 1 of 40)	1	36792191	36943666	151476	2	56030	22825	ENSMUSG00000026116	Tmem131	transmembrane protein 131	56030	0	gene_body	chr1:36920414-36920841	Tmem131	Tet
chr1	37419452	37419741	290	*	3' UTR	1	37417084	37430103	13020	2	76178	10362	ENSMUSG00000026112	Coa5	cytochrome C oxidase assembly factor 5	269180;269181;67387;76178	119587;121275;-10398;0	gene_body	chr1:37419452-37419741	Coa5	Tet
chr1	37419443	37419668	226	*	3' UTR	1	37417084	37430103	13020	2	76178	10435	ENSMUSG00000026112	Coa5	cytochrome C oxidase assembly factor 5	269180;269181;67387;76178	119578;121348;-10471;0	gene_body	chr1:37419443-37419668	Coa5	Tet
chr1	37419504	37419688	185	*	3' UTR	1	37417084	37430103	13020	2	76178	10415	ENSMUSG00000026112	Coa5	cytochrome C oxidase assembly factor 5	269180;269181;67387;76178	119639;121328;-10451;0	gene_body	chr1:37419504-37419688	Coa5	Tet
chr1	38395193	38395457	265	*	Intron (ENSMUST00000095027.8/16764, intron 5 of 21)	1	38132083	38159892	27810	1	329123	263110	ENSMUSG00000102716	Gm5099	predicted gene 5099	16764	0	gene_body	chr1:38395193-38395457	Gm5099	Tet
chr1	38557580	38558040	461	*	Intron (ENSMUST00000095027.8/16764, intron 1 of 21)	1	38177326	38664955	487630	2	16764	106915	ENSMUSG00000037138	Aff3	AF4/FMR2 family, member 3	16764	0	gene_body	chr1:38557580-38558040	Aff3	Tet
chr1	38557663	38557931	269	*	Intron (ENSMUST00000095027.8/16764, intron 1 of 21)	1	38177326	38664955	487630	2	16764	107024	ENSMUSG00000037138	Aff3	AF4/FMR2 family, member 3	16764	0	gene_body	chr1:38557663-38557931	Aff3	Tet
chr1	38557702	38557878	177	*	Intron (ENSMUST00000095027.8/16764, intron 1 of 21)	1	38177326	38664955	487630	2	16764	107077	ENSMUSG00000037138	Aff3	AF4/FMR2 family, member 3	16764	0	gene_body	chr1:38557702-38557878	Aff3	Tet
chr1	38657671	38657911	241	*	Intron (ENSMUST00000039827.13/16764, intron 1 of 22)	1	38177326	38664955	487630	2	16764	7044	ENSMUSG00000037138	Aff3	AF4/FMR2 family, member 3	16764	0	gene_body	chr1:38657671-38657911	Aff3	Tet
chr1	38723595	38724103	509	*	Distal Intergenic	1	38177326	38664955	487630	2	16764	-58640	ENSMUSG00000037138	Aff3	AF4/FMR2 family, member 3			Distal Intergenic	chr1:38723595-38724103	Aff3	Tet
chr1	38777586	38777848	263	*	Distal Intergenic	1	38793645	38836711	43067	2	381338	58863	ENSMUSG00000048814	Lonrf2	LON peptidase N-terminal domain and ring finger 2	381338	58863	Distal Intergenic	chr1:38777586-38777848	Lonrf2	Tet
chr1	38885956	38886224	269	*	Intron (ENSMUST00000195309.1/ENSMUST00000195309.1, intron 1 of 1)	1	38863867	38898161	34295	2	98388	11937	ENSMUSG00000026080	Chst10	carbohydrate sulfotransferase 10	381338;98388	-49245;0	gene_body	chr1:38885956-38886224	Chst10	Tet
chr1	39234802	39235237	436	*	Intron (ENSMUST00000173050.7/18143, intron 1 of 2)	1	39193731	39363236	169506	1	18143	41071	ENSMUSG00000026077	Npas2	neuronal PAS domain protein 2	102466631;18143	-47810;0	gene_body	chr1:39234802-39235237	Npas2	Tet
chr1	39576727	39577062	336	*	Promoter (<=1kb)	1	39551296	39577405	26110	2	67702	343	ENSMUSG00000048234	Rnf149	ring finger protein 149	100217461;263764;52846;67702	-27873;74412;41735;0	gene_body	chr1:39576727-39577062	Rnf149	Tet
chr1	39714004	39714200	197	*	Intron (ENSMUST00000151913.2/619289, intron 2 of 14)	1	39665301	39720997	55697	2	619289	6797	ENSMUSG00000057173	Rfx8	regulatory factor X 8	619289	0	gene_body	chr1:39714004-39714200	Rfx8	Tet
chr1	39842285	39842876	592	*	Exon (ENSMUST00000191299.6/73426, exon 5 of 5)	1	39839175	39847334	8160	2	73426	4458	ENSMUSG00000101634	1700066B17Rik	RIKEN cDNA 1700066B17 gene	100042065;73426	-36953;0	gene_body	chr1:39842285-39842876	1700066B17Rik	Tet
chr1	39896616	39896820	205	*	Distal Intergenic	1	39900913	40026310	125398	1	26921	-4093	ENSMUSG00000026074	Map4k4	mitogen-activated protein kinase kinase kinase kinase 4	26921;73426	0;0	Distal Intergenic	chr1:39896616-39896820	Map4k4	Tet
chr1	39896642	39896874	233	*	Distal Intergenic	1	39900913	40026310	125398	1	26921	-4039	ENSMUSG00000026074	Map4k4	mitogen-activated protein kinase kinase kinase kinase 4	26921;73426	0;0	Distal Intergenic	chr1:39896642-39896874	Map4k4	Tet
chr1	39918002	39918177	176	*	Intron (ENSMUST00000163854.8/26921, intron 2 of 30)	1	39900913	40026310	125398	1	26921	17089	ENSMUSG00000026074	Map4k4	mitogen-activated protein kinase kinase kinase kinase 4	26921	0	gene_body	chr1:39918002-39918177	Map4k4	Tet
chr1	39917927	39918211	285	*	Intron (ENSMUST00000163854.8/26921, intron 2 of 30)	1	39900913	40026310	125398	1	26921	17014	ENSMUSG00000026074	Map4k4	mitogen-activated protein kinase kinase kinase kinase 4	26921	0	gene_body	chr1:39917927-39918211	Map4k4	Tet
chr1	39922772	39922978	207	*	Intron (ENSMUST00000163854.8/26921, intron 2 of 30)	1	39900913	40026310	125398	1	26921	21859	ENSMUSG00000026074	Map4k4	mitogen-activated protein kinase kinase kinase kinase 4	26921	0	gene_body	chr1:39922772-39922978	Map4k4	Tet
chr1	39923490	39923670	181	*	Intron (ENSMUST00000163854.8/26921, intron 2 of 30)	1	39900913	40026310	125398	1	26921	22577	ENSMUSG00000026074	Map4k4	mitogen-activated protein kinase kinase kinase kinase 4	26921	0	gene_body	chr1:39923490-39923670	Map4k4	Tet
chr1	39922796	39922972	177	*	Intron (ENSMUST00000163854.8/26921, intron 2 of 30)	1	39900913	40026310	125398	1	26921	21883	ENSMUSG00000026074	Map4k4	mitogen-activated protein kinase kinase kinase kinase 4	26921	0	gene_body	chr1:39922796-39922972	Map4k4	Tet
chr1	39936270	39936811	542	*	Intron (ENSMUST00000163854.8/26921, intron 2 of 30)	1	39900913	40026310	125398	1	26921	35357	ENSMUSG00000026074	Map4k4	mitogen-activated protein kinase kinase kinase kinase 4	26921	0	gene_body	chr1:39936270-39936811	Map4k4	Tet
chr1	39936405	39936758	354	*	Intron (ENSMUST00000163854.8/26921, intron 2 of 30)	1	39900913	40026310	125398	1	26921	35492	ENSMUSG00000026074	Map4k4	mitogen-activated protein kinase kinase kinase kinase 4	26921	0	gene_body	chr1:39936405-39936758	Map4k4	Tet
chr1	39936401	39936803	403	*	Intron (ENSMUST00000163854.8/26921, intron 2 of 30)	1	39900913	40026310	125398	1	26921	35488	ENSMUSG00000026074	Map4k4	mitogen-activated protein kinase kinase kinase kinase 4	26921	0	gene_body	chr1:39936401-39936803	Map4k4	Tet
chr1	39936541	39936721	181	*	Intron (ENSMUST00000163854.8/26921, intron 2 of 30)	1	39900913	40026310	125398	1	26921	35628	ENSMUSG00000026074	Map4k4	mitogen-activated protein kinase kinase kinase kinase 4	26921	0	gene_body	chr1:39936541-39936721	Map4k4	Tet
chr1	40056062	40056305	244	*	Distal Intergenic	1	40074079	40125231	51153	1	16178	-17774	ENSMUSG00000026073	Il1r2	interleukin 1 receptor, type II	100047133;16178;26921	29546;-17774;0	Distal Intergenic	chr1:40056062-40056305	Il1r2	Tet
chr1	40681857	40682006	150	*	Promoter (1-2kb)	1	40680574	40769273	88700	1	226999	1283	ENSMUSG00000026062	Slc9a2	solute carrier family 9 (sodium/hydrogen exchanger), member 2	226999	0	gene_body	chr1:40681857-40682006	Slc9a2	Tet
chr1	43163440	43163602	163	*	Intron (ENSMUST00000008280.13/14200, intron 1 of 5)	1	43123074	43196984	73911	2	14200	33382	ENSMUSG00000008136	Fhl2	four and a half LIM domains 2	14200;98404	0;64730	gene_body	chr1:43163440-43163602	Fhl2	Tet
chr1	43241298	43241597	300	*	Distal Intergenic	1	43123074	43196984	73911	2	14200	-44314	ENSMUSG00000008136	Fhl2	four and a half LIM domains 2	14200	0	Distal Intergenic	chr1:43241298-43241597	Fhl2	Tet
chr1	43446098	43446411	314	*	Promoter (1-2kb)	1	43444579	43570515	125937	1	17974	1519	ENSMUSG00000066877	Nck2	non-catalytic region of tyrosine kinase adaptor protein 2	17974	0	gene_body	chr1:43446098-43446411	Nck2	Tet
chr1	43446065	43446235	171	*	Promoter (1-2kb)	1	43444579	43570515	125937	1	17974	1486	ENSMUSG00000066877	Nck2	non-catalytic region of tyrosine kinase adaptor protein 2	17974	0	gene_body	chr1:43446065-43446235	Nck2	Tet
chr1	43465049	43465293	245	*	Intron (ENSMUST00000187435.6/17974, intron 1 of 2)	1	43444579	43570515	125937	1	17974	20470	ENSMUSG00000066877	Nck2	non-catalytic region of tyrosine kinase adaptor protein 2	17974	0	gene_body	chr1:43465049-43465293	Nck2	Tet
chr1	43465051	43465256	206	*	Intron (ENSMUST00000187435.6/17974, intron 1 of 2)	1	43444579	43570515	125937	1	17974	20472	ENSMUSG00000066877	Nck2	non-catalytic region of tyrosine kinase adaptor protein 2	17974	0	gene_body	chr1:43465051-43465256	Nck2	Tet
chr1	43474810	43475033	224	*	Intron (ENSMUST00000187435.6/17974, intron 1 of 2)	1	43444579	43570515	125937	1	17974	30231	ENSMUSG00000066877	Nck2	non-catalytic region of tyrosine kinase adaptor protein 2	17974	0	gene_body	chr1:43474810-43475033	Nck2	Tet
chr1	43520300	43520534	235	*	Intron (ENSMUST00000187435.6/17974, intron 2 of 2)	1	43444579	43570515	125937	1	17974	75721	ENSMUSG00000066877	Nck2	non-catalytic region of tyrosine kinase adaptor protein 2	17974	0	gene_body	chr1:43520300-43520534	Nck2	Tet
chr1	43537077	43537331	255	*	Intron (ENSMUST00000086421.8/17974, intron 3 of 4)	1	43444579	43570515	125937	1	17974	92498	ENSMUSG00000066877	Nck2	non-catalytic region of tyrosine kinase adaptor protein 2	17974	0	gene_body	chr1:43537077-43537331	Nck2	Tet
chr1	43538821	43538970	150	*	Intron (ENSMUST00000086421.8/17974, intron 3 of 4)	1	43444579	43570515	125937	1	17974	94242	ENSMUSG00000066877	Nck2	non-catalytic region of tyrosine kinase adaptor protein 2	17974	0	gene_body	chr1:43538821-43538970	Nck2	Tet
chr1	43542397	43542604	208	*	Intron (ENSMUST00000086421.8/17974, intron 3 of 4)	1	43444579	43570515	125937	1	17974	97818	ENSMUSG00000066877	Nck2	non-catalytic region of tyrosine kinase adaptor protein 2	17974	0	gene_body	chr1:43542397-43542604	Nck2	Tet
chr1	43544697	43544877	181	*	Intron (ENSMUST00000086421.8/17974, intron 3 of 4)	1	43444579	43570515	125937	1	17974	100118	ENSMUSG00000066877	Nck2	non-catalytic region of tyrosine kinase adaptor protein 2	17974	0	gene_body	chr1:43544697-43544877	Nck2	Tet
chr1	43562401	43562586	186	*	Intron (ENSMUST00000086421.8/17974, intron 4 of 4)	1	43444579	43570515	125937	1	17974	117822	ENSMUSG00000066877	Nck2	non-catalytic region of tyrosine kinase adaptor protein 2	17974	0	gene_body	chr1:43562401-43562586	Nck2	Tet
chr1	44042254	44042503	250	*	Distal Intergenic	1	44009408	44020034	10627	2	433294	-22220	ENSMUSG00000047343	Mettl21c	methyltransferase like 21C	22019;433294;72050;75623	108607;-22220;76305;67542	Distal Intergenic	chr1:44042254-44042503	Mettl21c	Tet
chr1	44122353	44122516	164	*	Intron (ENSMUST00000155917.7/246229, intron 2 of 2)	1	44118957	44144770	25814	1	246229	3396	ENSMUSG00000041684	Bivm	basic, immunoglobulin-like variable motif containing	22592;246229;72050;75623	-25331;0;-3545;-12308	gene_body	chr1:44122353-44122516	Bivm	Tet
chr1	46852696	46853043	348	*	Intron (ENSMUST00000027131.5/227059, intron 1 of 9)	1	46807544	46892852	85309	2	227059	39809	ENSMUSG00000025986	Slc39a10	solute carrier family 39 (zinc transporter), member 10	100101919;227059	427104;0	gene_body	chr1:46852696-46853043	Slc39a10	Tet
chr1	46852751	46853109	359	*	Intron (ENSMUST00000027131.5/227059, intron 1 of 9)	1	46807544	46892852	85309	2	227059	39743	ENSMUSG00000025986	Slc39a10	solute carrier family 39 (zinc transporter), member 10	100101919;227059	427159;0	gene_body	chr1:46852751-46853109	Slc39a10	Tet
chr1	46852759	46853096	338	*	Intron (ENSMUST00000027131.5/227059, intron 1 of 9)	1	46807544	46892852	85309	2	227059	39756	ENSMUSG00000025986	Slc39a10	solute carrier family 39 (zinc transporter), member 10	100101919;227059	427167;0	gene_body	chr1:46852759-46853096	Slc39a10	Tet
chr1	46853215	46853708	494	*	5' UTR	1	46807544	46892852	85309	2	227059	39144	ENSMUSG00000025986	Slc39a10	solute carrier family 39 (zinc transporter), member 10	100101919;227059	427623;0	gene_body	chr1:46853215-46853708	Slc39a10	Tet
chr1	51584813	51585465	653	*	Intron (ENSMUST00000189410.1/100045066, intron 2 of 3)	1	51507086	51596718	89633	2	100045066	11253	ENSMUSG00000099413	Gm17767	predicted gene, 17767	100045066	0	gene_body	chr1:51584813-51585465	Gm17767	Tet
chr1	51584774	51585463	690	*	Intron (ENSMUST00000189410.1/100045066, intron 2 of 3)	1	51507086	51596718	89633	2	100045066	11255	ENSMUSG00000099413	Gm17767	predicted gene, 17767	100045066	0	gene_body	chr1:51584774-51585463	Gm17767	Tet
chr1	51584925	51585357	433	*	Intron (ENSMUST00000189410.1/100045066, intron 2 of 3)	1	51507086	51596718	89633	2	100045066	11361	ENSMUSG00000099413	Gm17767	predicted gene, 17767	100045066	0	gene_body	chr1:51584925-51585357	Gm17767	Tet
chr1	51584888	51585312	425	*	Intron (ENSMUST00000189410.1/100045066, intron 2 of 3)	1	51507086	51596718	89633	2	100045066	11406	ENSMUSG00000099413	Gm17767	predicted gene, 17767	100045066	0	gene_body	chr1:51584888-51585312	Gm17767	Tet
chr1	51593807	51594261	455	*	Intron (ENSMUST00000189410.1/100045066, intron 1 of 3)	1	51507086	51596718	89633	2	100045066	2457	ENSMUSG00000099413	Gm17767	predicted gene, 17767	100045066	0	gene_body	chr1:51593807-51594261	Gm17767	Tet
chr1	51593841	51594129	289	*	Intron (ENSMUST00000189410.1/100045066, intron 1 of 3)	1	51507086	51596718	89633	2	100045066	2589	ENSMUSG00000099413	Gm17767	predicted gene, 17767	100045066	0	gene_body	chr1:51593841-51594129	Gm17767	Tet
chr1	51593915	51594273	359	*	Intron (ENSMUST00000189410.1/100045066, intron 1 of 3)	1	51507086	51596718	89633	2	100045066	2445	ENSMUSG00000099413	Gm17767	predicted gene, 17767	100045066	0	gene_body	chr1:51593915-51594273	Gm17767	Tet
chr1	52011341	52011605	265	*	Intron (ENSMUST00000168302.7/20849, intron 2 of 24)	1	51987148	52107189	120042	1	20849	24193	ENSMUSG00000062939	Stat4	signal transducer and activator of transcription 4	20849	0	gene_body	chr1:52011341-52011605	Stat4	Tet
chr1	52011400	52011554	155	*	Intron (ENSMUST00000168302.7/20849, intron 2 of 24)	1	51987148	52107189	120042	1	20849	24252	ENSMUSG00000062939	Stat4	signal transducer and activator of transcription 4	20849	0	gene_body	chr1:52011400-52011554	Stat4	Tet
chr1	52011354	52011528	175	*	Intron (ENSMUST00000168302.7/20849, intron 2 of 24)	1	51987148	52107189	120042	1	20849	24206	ENSMUSG00000062939	Stat4	signal transducer and activator of transcription 4	20849	0	gene_body	chr1:52011354-52011528	Stat4	Tet
chr1	52019733	52020026	294	*	Intron (ENSMUST00000168302.7/20849, intron 4 of 24)	1	51987148	52107189	120042	1	20849	32585	ENSMUSG00000062939	Stat4	signal transducer and activator of transcription 4	20849	0	gene_body	chr1:52019733-52020026	Stat4	Tet
chr1	52019776	52019925	150	*	Intron (ENSMUST00000168302.7/20849, intron 4 of 24)	1	51987148	52107189	120042	1	20849	32628	ENSMUSG00000062939	Stat4	signal transducer and activator of transcription 4	20849	0	gene_body	chr1:52019776-52019925	Stat4	Tet
chr1	52035425	52035703	279	*	Intron (ENSMUST00000168302.7/20849, intron 4 of 24)	1	52077261	52161865	84605	1	20846	-41558	ENSMUSG00000026104	Stat1	signal transducer and activator of transcription 1	20846;20849	0;0	gene_body	chr1:52035425-52035703	Stat1	Tet
chr1	52035424	52035653	230	*	Intron (ENSMUST00000168302.7/20849, intron 4 of 24)	1	52077261	52161865	84605	1	20846	-41608	ENSMUSG00000026104	Stat1	signal transducer and activator of transcription 1	20846;20849	0;0	gene_body	chr1:52035424-52035653	Stat1	Tet
chr1	52039292	52039526	235	*	Intron (ENSMUST00000168302.7/20849, intron 4 of 24)	1	52077261	52161865	84605	1	20846	-37735	ENSMUSG00000026104	Stat1	signal transducer and activator of transcription 1	20846;20849	0;0	gene_body	chr1:52039292-52039526	Stat1	Tet
chr1	52040765	52040914	150	*	Intron (ENSMUST00000168302.7/20849, intron 4 of 24)	1	52077261	52161865	84605	1	20846	-36347	ENSMUSG00000026104	Stat1	signal transducer and activator of transcription 1	20846;20849	0;0	gene_body	chr1:52040765-52040914	Stat1	Tet
chr1	52046553	52046709	157	*	Intron (ENSMUST00000168302.7/20849, intron 4 of 24)	1	52077261	52161865	84605	1	20846	-30552	ENSMUSG00000026104	Stat1	signal transducer and activator of transcription 1	20846;20849	0;0	gene_body	chr1:52046553-52046709	Stat1	Tet
chr1	52046916	52047065	150	*	Intron (ENSMUST00000168302.7/20849, intron 4 of 24)	1	52077261	52161865	84605	1	20846	-30196	ENSMUSG00000026104	Stat1	signal transducer and activator of transcription 1	20846;20849	0;0	gene_body	chr1:52046916-52047065	Stat1	Tet
chr1	52100662	52100829	168	*	Intron (ENSMUST00000168302.7/20849, intron 18 of 24)	1	52077261	52161865	84605	1	20846	23401	ENSMUSG00000026104	Stat1	signal transducer and activator of transcription 1	20846;20849	0;0	gene_body	chr1:52100662-52100829	Stat1	Tet
chr1	52133294	52133530	237	*	Intron (ENSMUST00000185516.1/20846, intron 18 of 33)	1	52077261	52161865	84605	1	20846	56033	ENSMUSG00000026104	Stat1	signal transducer and activator of transcription 1	14660;20846;20849	0;0;0	gene_body	chr1:52133294-52133530	Stat1	Tet
chr1	52166763	52166931	169	*	Intron (ENSMUST00000114513.8/14660, intron 17 of 17)	1	52163448	52233232	69785	2	14660	66301	ENSMUSG00000026103	Gls	glutaminase	14660;20846	0;0	gene_body	chr1:52166763-52166931	Gls	Tet
chr1	52363675	52363955	281	*	Distal Intergenic	1	52163448	52233232	69785	2	14660	-130443	ENSMUSG00000026103	Gls	glutaminase			Distal Intergenic	chr1:52363675-52363955	Gls	Tet
chr1	52366454	52366789	336	*	Distal Intergenic	1	52163448	52233232	69785	2	14660	-133222	ENSMUSG00000026103	Gls	glutaminase			Distal Intergenic	chr1:52366454-52366789	Gls	Tet
chr1	52374737	52374919	183	*	Distal Intergenic	1	52457294	52500679	43386	2	17936	125760	ENSMUSG00000002881	Nab1	Ngfi-A binding protein 1			Distal Intergenic	chr1:52374737-52374919	Nab1	Tet
chr1	52388253	52388465	213	*	Distal Intergenic	1	52457294	52500679	43386	2	17936	112214	ENSMUSG00000002881	Nab1	Ngfi-A binding protein 1			Distal Intergenic	chr1:52388253-52388465	Nab1	Tet
chr1	52388237	52388387	151	*	Distal Intergenic	1	52457294	52500679	43386	2	17936	112292	ENSMUSG00000002881	Nab1	Ngfi-A binding protein 1			Distal Intergenic	chr1:52388237-52388387	Nab1	Tet
chr1	52454746	52455033	288	*	Distal Intergenic	1	52457294	52500679	43386	2	17936	45646	ENSMUSG00000002881	Nab1	Ngfi-A binding protein 1	17936	45646	Distal Intergenic	chr1:52454746-52455033	Nab1	Tet
chr1	52578350	52578517	168	*	Promoter (1-2kb)	1	52570014	52580291	10278	2	102634661	1774	ENSMUSG00000099878	Gm28178	predicted gene 28178	102634661	0	gene_body	chr1:52578350-52578517	Gm28178	Tet
chr1	52597891	52598120	230	*	Distal Intergenic	1	52570014	52580291	10278	2	102634661	-17600	ENSMUSG00000099878	Gm28178	predicted gene 28178	102634661;227094	0;0	Distal Intergenic	chr1:52597891-52598120	Gm28178	Tet
chr1	52631039	52631210	172	*	Promoter (<=1kb)	1	52630703	52651919	21217	1	227094	336	ENSMUSG00000043015	Nemp2	nuclear envelope integral membrane protein 2	227094;98682	0;0	gene_body	chr1:52631039-52631210	Nemp2	Tet
chr1	52650201	52650375	175	*	3' UTR	1	52630703	52651919	21217	1	227094	19498	ENSMUSG00000043015	Nemp2	nuclear envelope integral membrane protein 2	227094;98682	0;0	gene_body	chr1:52650201-52650375	Nemp2	Tet
chr1	52652687	52652846	160	*	Downstream (<1kb)	1	52630703	52651919	21217	1	227094	21984	ENSMUSG00000043015	Nemp2	nuclear envelope integral membrane protein 2	227094;98682	0;0	gene_body	chr1:52652687-52652846	Nemp2	Tet
chr1	52653340	52653687	348	*	Downstream (1-2kb)	1	52630703	52651919	21217	1	227094	22637	ENSMUSG00000043015	Nemp2	nuclear envelope integral membrane protein 2	227094;98682	0;0	gene_body	chr1:52653340-52653687	Nemp2	Tet
chr1	52726327	52726570	244	*	Promoter (<=1kb)	1	52656286	52727462	71177	2	98682	892	ENSMUSG00000041439	Mfsd6	major facilitator superfamily domain containing 6	98682	0	gene_body	chr1:52726327-52726570	Mfsd6	Tet
chr1	52726773	52727040	268	*	Promoter (<=1kb)	1	52656286	52727462	71177	2	98682	422	ENSMUSG00000041439	Mfsd6	major facilitator superfamily domain containing 6	98682	0	gene_body	chr1:52726773-52727040	Mfsd6	Tet
chr1	53049872	53050319	448	*	Distal Intergenic	1	53061640	53068079	6440	1	17700	-11321	ENSMUSG00000026100	Mstn	myostatin	17700;67080	-11321;-29693	Distal Intergenic	chr1:53049872-53050319	Mstn	Tet
chr1	53761765	53761996	232	*	Exon (ENSMUST00000187066.1/ENSMUST00000187066.1, exon 1 of 1)	1	53755506	53785224	29719	2	98267	23228	ENSMUSG00000026094	Stk17b	serine/threonine kinase 17b (apoptosis-inducing)	329152;98267	0;0	gene_body	chr1:53761765-53761996	Stk17b	Tet
chr1	53773989	53774280	292	*	Intron (ENSMUST00000027263.13/98267, intron 2 of 7)	1	53755506	53785224	29719	2	98267	10944	ENSMUSG00000026094	Stk17b	serine/threonine kinase 17b (apoptosis-inducing)	329152;98267	0;0	gene_body	chr1:53773989-53774280	Stk17b	Tet
chr1	53776665	53776920	256	*	5' UTR	1	53755506	53785224	29719	2	98267	8304	ENSMUSG00000026094	Stk17b	serine/threonine kinase 17b (apoptosis-inducing)	329152;98267	0;0	gene_body	chr1:53776665-53776920	Stk17b	Tet
chr1	53773974	53774234	261	*	Intron (ENSMUST00000027263.13/98267, intron 2 of 7)	1	53755506	53785224	29719	2	98267	10990	ENSMUSG00000026094	Stk17b	serine/threonine kinase 17b (apoptosis-inducing)	329152;98267	0;0	gene_body	chr1:53773974-53774234	Stk17b	Tet
chr1	53776686	53776867	182	*	Intron (ENSMUST00000027263.13/98267, intron 1 of 7)	1	53755506	53785224	29719	2	98267	8357	ENSMUSG00000026094	Stk17b	serine/threonine kinase 17b (apoptosis-inducing)	329152;98267	0;0	gene_body	chr1:53776686-53776867	Stk17b	Tet
chr1	53774047	53774214	168	*	Intron (ENSMUST00000027263.13/98267, intron 2 of 7)	1	53755506	53785224	29719	2	98267	11010	ENSMUSG00000026094	Stk17b	serine/threonine kinase 17b (apoptosis-inducing)	329152;98267	0;0	gene_body	chr1:53774047-53774214	Stk17b	Tet
chr1	53784270	53784506	237	*	Promoter (<=1kb)	1	53755506	53785224	29719	2	98267	718	ENSMUSG00000026094	Stk17b	serine/threonine kinase 17b (apoptosis-inducing)	329152;98267	0;0	gene_body	chr1:53784270-53784506	Stk17b	Tet
chr1	53791439	53791650	212	*	Exon (ENSMUST00000194911.1/ENSMUST00000194911.1, exon 1 of 1)	1	53755506	53785224	29719	2	98267	-6215	ENSMUSG00000026094	Stk17b	serine/threonine kinase 17b (apoptosis-inducing)	329152;98267	0;0	gene_body	chr1:53791439-53791650	Stk17b	Tet
chr1	53795221	53795370	150	*	Distal Intergenic	1	53755506	53785224	29719	2	98267	-9997	ENSMUSG00000026094	Stk17b	serine/threonine kinase 17b (apoptosis-inducing)	329152;98267	0;0	Distal Intergenic	chr1:53795221-53795370	Stk17b	Tet
chr1	53797112	53797415	304	*	Distal Intergenic	1	53755506	53785224	29719	2	98267	-11888	ENSMUSG00000026094	Stk17b	serine/threonine kinase 17b (apoptosis-inducing)	329152;98267	0;0	Distal Intergenic	chr1:53797112-53797415	Stk17b	Tet
chr1	53797784	53798141	358	*	Distal Intergenic	1	53755506	53785224	29719	2	98267	-12560	ENSMUSG00000026094	Stk17b	serine/threonine kinase 17b (apoptosis-inducing)	329152;98267	0;0	Distal Intergenic	chr1:53797784-53798141	Stk17b	Tet
chr1	53797892	53798041	150	*	Distal Intergenic	1	53755506	53785224	29719	2	98267	-12668	ENSMUSG00000026094	Stk17b	serine/threonine kinase 17b (apoptosis-inducing)	329152;98267	0;0	Distal Intergenic	chr1:53797892-53798041	Stk17b	Tet
chr1	53823817	53824163	347	*	Intron (ENSMUST00000120904.7/329152, intron 28 of 28)	1	53849424	53849495	72	1	102465783	-25261	ENSMUSG00000098443	Mir7681	microRNA 7681	102465783;329152;98267	-25261;0;0	gene_body	chr1:53823817-53824163	Mir7681	Tet
chr1	53823823	53824008	186	*	Intron (ENSMUST00000120904.7/329152, intron 28 of 28)	1	53849424	53849495	72	1	102465783	-25416	ENSMUSG00000098443	Mir7681	microRNA 7681	102465783;329152;98267	-25416;0;0	gene_body	chr1:53823823-53824008	Mir7681	Tet
chr1	53838244	53838770	527	*	Intron (ENSMUST00000120904.7/329152, intron 23 of 28)	1	53849424	53849495	72	1	102465783	-10654	ENSMUSG00000098443	Mir7681	microRNA 7681	102465783;329152	-10654;0	gene_body	chr1:53838244-53838770	Mir7681	Tet
chr1	53845270	53845629	360	*	Intron (ENSMUST00000120904.7/329152, intron 21 of 28)	1	53849424	53849495	72	1	102465783	-3795	ENSMUSG00000098443	Mir7681	microRNA 7681	102465783;329152	-3795;0	gene_body	chr1:53845270-53845629	Mir7681	Tet
chr1	53851405	53851710	306	*	Promoter (1-2kb)	1	53849424	53849495	72	1	102465783	1981	ENSMUSG00000098443	Mir7681	microRNA 7681	102465783;329152	1981;0	gene_body	chr1:53851405-53851710	Mir7681	Tet
chr1	53851417	53851718	302	*	Promoter (1-2kb)	1	53849424	53849495	72	1	102465783	1993	ENSMUSG00000098443	Mir7681	microRNA 7681	102465783;329152	1993;0	gene_body	chr1:53851417-53851718	Mir7681	Tet
chr1	53851465	53851744	280	*	Exon (ENSMUST00000120904.7/329152, exon 21 of 29)	1	53849424	53849495	72	1	102465783	2041	ENSMUSG00000098443	Mir7681	microRNA 7681	102465783;329152	2041;0	gene_body	chr1:53851465-53851744	Mir7681	Tet
chr1	54421828	54421977	150	*	Intron (ENSMUST00000041638.7/98488, intron 8 of 17)	1	54396004	54438971	42968	2	98488	16994	ENSMUSG00000041303	Gtf3c3	general transcription factor IIIC, polypeptide 3	98488	0	gene_body	chr1:54421828-54421977	Gtf3c3	Tet
chr1	54492430	54492849	420	*	Intron (ENSMUST00000097739.4/241062, intron 22 of 26)	1	54396004	54438971	42968	2	98488	-53459	ENSMUSG00000041303	Gtf3c3	general transcription factor IIIC, polypeptide 3	241062	0	gene_body	chr1:54492430-54492849	Gtf3c3	Tet
chr1	54492505	54492848	344	*	Intron (ENSMUST00000097739.4/241062, intron 22 of 26)	1	54396004	54438971	42968	2	98488	-53534	ENSMUSG00000041303	Gtf3c3	general transcription factor IIIC, polypeptide 3	241062	0	gene_body	chr1:54492505-54492848	Gtf3c3	Tet
chr1	54492576	54492765	190	*	Intron (ENSMUST00000097739.4/241062, intron 22 of 26)	1	54396004	54438971	42968	2	98488	-53605	ENSMUSG00000041303	Gtf3c3	general transcription factor IIIC, polypeptide 3	241062	0	gene_body	chr1:54492576-54492765	Gtf3c3	Tet
chr1	54585364	54585790	427	*	Distal Intergenic	1	54472994	54557684	84691	2	241062	-27680	ENSMUSG00000073678	Pgap1	post-GPI attachment to proteins 1	241062	0	Distal Intergenic	chr1:54585364-54585790	Pgap1	Tet
chr1	54585328	54585755	428	*	Distal Intergenic	1	54472994	54557684	84691	2	241062	-27644	ENSMUSG00000073678	Pgap1	post-GPI attachment to proteins 1	241062	0	Distal Intergenic	chr1:54585328-54585755	Pgap1	Tet
chr1	54585315	54585686	372	*	Distal Intergenic	1	54472994	54557684	84691	2	241062	-27631	ENSMUSG00000073678	Pgap1	post-GPI attachment to proteins 1	241062	0	Distal Intergenic	chr1:54585315-54585686	Pgap1	Tet
chr1	54585537	54585751	215	*	Distal Intergenic	1	54472994	54557684	84691	2	241062	-27853	ENSMUSG00000073678	Pgap1	post-GPI attachment to proteins 1	241062	0	Distal Intergenic	chr1:54585537-54585751	Pgap1	Tet
chr1	54747827	54747978	152	*	Intron (ENSMUST00000188243.1/ENSMUST00000188243.1, intron 2 of 2)	1	54645340	54926387	281048	2	329154	178409	ENSMUSG00000052331	Ankrd44	ankyrin repeat domain 44	329154	0	gene_body	chr1:54747827-54747978	Ankrd44	Tet
chr1	54827870	54828136	267	*	Intron (ENSMUST00000179030.7/329154, intron 2 of 27)	1	54645340	54926387	281048	2	329154	98251	ENSMUSG00000052331	Ankrd44	ankyrin repeat domain 44	329154	0	gene_body	chr1:54827870-54828136	Ankrd44	Tet
chr1	54827922	54828142	221	*	Intron (ENSMUST00000179030.7/329154, intron 2 of 27)	1	54645340	54926387	281048	2	329154	98245	ENSMUSG00000052331	Ankrd44	ankyrin repeat domain 44	329154	0	gene_body	chr1:54827922-54828142	Ankrd44	Tet
chr1	54827899	54828066	168	*	Intron (ENSMUST00000179030.7/329154, intron 2 of 27)	1	54645340	54926387	281048	2	329154	98321	ENSMUSG00000052331	Ankrd44	ankyrin repeat domain 44	329154	0	gene_body	chr1:54827899-54828066	Ankrd44	Tet
chr1	54840272	54840449	178	*	Intron (ENSMUST00000179030.7/329154, intron 1 of 27)	1	54645340	54926387	281048	2	329154	85938	ENSMUSG00000052331	Ankrd44	ankyrin repeat domain 44	329154	0	gene_body	chr1:54840272-54840449	Ankrd44	Tet
chr1	54841774	54842170	397	*	Intron (ENSMUST00000179030.7/329154, intron 1 of 27)	1	54645340	54926387	281048	2	329154	84217	ENSMUSG00000052331	Ankrd44	ankyrin repeat domain 44	329154	0	gene_body	chr1:54841774-54842170	Ankrd44	Tet
chr1	54841800	54842116	317	*	Intron (ENSMUST00000179030.7/329154, intron 1 of 27)	1	54645340	54926387	281048	2	329154	84271	ENSMUSG00000052331	Ankrd44	ankyrin repeat domain 44	329154	0	gene_body	chr1:54841800-54842116	Ankrd44	Tet
chr1	54841794	54842136	343	*	Intron (ENSMUST00000179030.7/329154, intron 1 of 27)	1	54645340	54926387	281048	2	329154	84251	ENSMUSG00000052331	Ankrd44	ankyrin repeat domain 44	329154	0	gene_body	chr1:54841794-54842136	Ankrd44	Tet
chr1	54841823	54842115	293	*	Intron (ENSMUST00000179030.7/329154, intron 1 of 27)	1	54645340	54926387	281048	2	329154	84272	ENSMUSG00000052331	Ankrd44	ankyrin repeat domain 44	329154	0	gene_body	chr1:54841823-54842115	Ankrd44	Tet
chr1	54847330	54847479	150	*	Intron (ENSMUST00000179030.7/329154, intron 1 of 27)	1	54645340	54926387	281048	2	329154	78908	ENSMUSG00000052331	Ankrd44	ankyrin repeat domain 44	329154	0	gene_body	chr1:54847330-54847479	Ankrd44	Tet
chr1	54882349	54882730	382	*	Intron (ENSMUST00000179030.7/329154, intron 1 of 27)	1	54645340	54926387	281048	2	329154	43657	ENSMUSG00000052331	Ankrd44	ankyrin repeat domain 44	329154	0	gene_body	chr1:54882349-54882730	Ankrd44	Tet
chr1	54882908	54883107	200	*	Intron (ENSMUST00000179030.7/329154, intron 1 of 27)	1	54645340	54926387	281048	2	329154	43280	ENSMUSG00000052331	Ankrd44	ankyrin repeat domain 44	329154	0	gene_body	chr1:54882908-54883107	Ankrd44	Tet
chr1	54882879	54883080	202	*	Intron (ENSMUST00000179030.7/329154, intron 1 of 27)	1	54645340	54926387	281048	2	329154	43307	ENSMUSG00000052331	Ankrd44	ankyrin repeat domain 44	329154	0	gene_body	chr1:54882879-54883080	Ankrd44	Tet
chr1	54896503	54896774	272	*	Intron (ENSMUST00000179030.7/329154, intron 1 of 27)	1	54645340	54926387	281048	2	329154	29613	ENSMUSG00000052331	Ankrd44	ankyrin repeat domain 44	329154	0	gene_body	chr1:54896503-54896774	Ankrd44	Tet
chr1	54913402	54913849	448	*	Exon (ENSMUST00000193052.1/ENSMUST00000193052.1, exon 1 of 1)	1	54645340	54926387	281048	2	329154	12538	ENSMUSG00000052331	Ankrd44	ankyrin repeat domain 44	329154	0	gene_body	chr1:54913402-54913849	Ankrd44	Tet
chr1	54913459	54913833	375	*	Intron (ENSMUST00000179030.7/329154, intron 1 of 27)	1	54645340	54926387	281048	2	329154	12554	ENSMUSG00000052331	Ankrd44	ankyrin repeat domain 44	329154	0	gene_body	chr1:54913459-54913833	Ankrd44	Tet
chr1	54913615	54913809	195	*	Intron (ENSMUST00000179030.7/329154, intron 1 of 27)	1	54645340	54926387	281048	2	329154	12578	ENSMUSG00000052331	Ankrd44	ankyrin repeat domain 44	329154	0	gene_body	chr1:54913615-54913809	Ankrd44	Tet
chr1	54923979	54924219	241	*	Intron (ENSMUST00000179030.7/329154, intron 1 of 27)	1	54645340	54926387	281048	2	329154	2168	ENSMUSG00000052331	Ankrd44	ankyrin repeat domain 44	329154	0	gene_body	chr1:54923979-54924219	Ankrd44	Tet
chr1	55131567	55131922	356	*	Promoter (<=1kb)	1	55131231	55154899	23669	1	19070	336	ENSMUSG00000025979	Mob4	MOB family member 4, phocein	15510;15528;19070;74013	-43324;43435;0;0	gene_body	chr1:55131567-55131922	Mob4	Tet
chr1	55215525	55215747	223	*	Intron (ENSMUST00000027121.14/74013, intron 1 of 8)	1	55170159	55226782	56624	2	74013	11035	ENSMUSG00000025978	Rftn2	raftlin family member 2	212679;74013;75388	-21430;0;147722	gene_body	chr1:55215525-55215747	Rftn2	Tet
chr1	58423581	58423781	201	*	Promoter (<=1kb)	1	58410189	58424066	13878	2	12747	285	ENSMUSG00000026034	Clk1	CDC-like kinase 1	12747;18393;213043;65102;66882;70225	0;81328;145255;-21370;30683;21705	gene_body	chr1:58423581-58423781	Clk1	Tet
chr1	58721044	58721227	184	*	Intron (ENSMUST00000140940.7/12633, intron 2 of 9)	1	58711508	58758884	47377	1	12633	9536	ENSMUSG00000026031	Cflar	CASP8 and FADD-like apoptosis regulator	108812;12633	-25055;0	gene_body	chr1:58721044-58721227	Cflar	Tet
chr1	58721018	58721192	175	*	Intron (ENSMUST00000140940.7/12633, intron 2 of 9)	1	58711508	58758884	47377	1	12633	9510	ENSMUSG00000026031	Cflar	CASP8 and FADD-like apoptosis regulator	108812;12633	-25029;0	gene_body	chr1:58721018-58721192	Cflar	Tet
chr1	58725923	58726127	205	*	Intron (ENSMUST00000140940.7/12633, intron 2 of 9)	1	58711508	58758884	47377	1	12633	14415	ENSMUSG00000026031	Cflar	CASP8 and FADD-like apoptosis regulator	108812;12633	-29934;0	gene_body	chr1:58725923-58726127	Cflar	Tet
chr1	58742499	58742888	390	*	Intron (ENSMUST00000140940.7/12633, intron 8 of 9)	1	58711508	58758884	47377	1	12633	30991	ENSMUSG00000026031	Cflar	CASP8 and FADD-like apoptosis regulator	108812;12633	-46510;0	gene_body	chr1:58742499-58742888	Cflar	Tet
chr1	58743237	58743488	252	*	Intron (ENSMUST00000140940.7/12633, intron 8 of 9)	1	58711508	58758884	47377	1	12633	31729	ENSMUSG00000026031	Cflar	CASP8 and FADD-like apoptosis regulator	108812;12633	-47248;0	gene_body	chr1:58743237-58743488	Cflar	Tet
chr1	58742635	58742806	172	*	Intron (ENSMUST00000140940.7/12633, intron 8 of 9)	1	58711508	58758884	47377	1	12633	31127	ENSMUSG00000026031	Cflar	CASP8 and FADD-like apoptosis regulator	108812;12633	-46646;0	gene_body	chr1:58742635-58742806	Cflar	Tet
chr1	58859817	58860050	234	*	Intron (ENSMUST00000188624.1/ENSMUST00000188624.1, intron 8 of 11)	1	58795374	58847503	52130	1	12370	64443	ENSMUSG00000026029	Casp8	caspase 8	12370;70827	64443;113380	gene_body	chr1:58859817-58860050	Casp8	Tet
chr1	59670257	59670459	203	*	Promoter (<=1kb)	1	59586558	59670834	84277	2	22218	375	ENSMUSG00000026021	Sumo1	small ubiquitin-like modifier 1	100217421;100217459;22218;381260;55989	-34331;-21475;0;153993;-14512	gene_body	chr1:59670257-59670459	Sumo1	Tet
chr1	59738942	59739280	339	*	Distal Intergenic	1	59763400	59879014	115615	1	12168	-24120	ENSMUSG00000067336	Bmpr2	bone morphogenetic protein receptor, type II (serine/threonine kinase)	100217421;100217459;12168;55989	34152;47008;0;53971	Distal Intergenic	chr1:59738942-59739280	Bmpr2	Tet
chr1	59763699	59763867	169	*	Promoter (<=1kb)	1	59763400	59879014	115615	1	12168	299	ENSMUSG00000067336	Bmpr2	bone morphogenetic protein receptor, type II (serine/threonine kinase)	12168;55989	0;78728	gene_body	chr1:59763699-59763867	Bmpr2	Tet
chr1	59886948	59887329	382	*	Exon (ENSMUST00000193096.1/ENSMUST00000193096.1, exon 1 of 1)	1	59913006	59985346	72341	1	72750	-25677	ENSMUSG00000041040	Fam117b	family with sequence similarity 117, member B	12168;72750	0;0	gene_body	chr1:59886948-59887329	Fam117b	Tet
chr1	59913704	59913880	177	*	Promoter (<=1kb)	1	59913006	59985346	72341	1	72750	698	ENSMUSG00000041040	Fam117b	family with sequence similarity 117, member B	12168;72750	0;0	gene_body	chr1:59913704-59913880	Fam117b	Tet
chr1	59913627	59913848	222	*	Promoter (<=1kb)	1	59913006	59985346	72341	1	72750	621	ENSMUSG00000041040	Fam117b	family with sequence similarity 117, member B	12168;72750	0;0	gene_body	chr1:59913627-59913848	Fam117b	Tet
chr1	60016042	60016669	628	*	Intron (ENSMUST00000027172.12/70375, intron 3 of 10)	1	59989068	60043184	54117	2	70375	26515	ENSMUSG00000026018	Ica1l	islet cell autoantigen 1-like	70375;72750	0;0	gene_body	chr1:60016042-60016669	Ica1l	Tet
chr1	60016951	60017237	287	*	Intron (ENSMUST00000027172.12/70375, intron 3 of 10)	1	59989068	60043184	54117	2	70375	25947	ENSMUSG00000026018	Ica1l	islet cell autoantigen 1-like	70375;72750	0;0	gene_body	chr1:60016951-60017237	Ica1l	Tet
chr1	60042659	60042842	184	*	Promoter (<=1kb)	1	59989068	60043184	54117	2	70375	342	ENSMUSG00000026018	Ica1l	islet cell autoantigen 1-like	57750;70375	55803;0	gene_body	chr1:60042659-60042842	Ica1l	Tet
chr1	60410025	60410244	220	*	Promoter (<=1kb)	1	60409619	60481158	71540	1	329165	406	ENSMUSG00000026782	Abi2	abl interactor 2	329165;77951	0;66702	gene_body	chr1:60410025-60410244	Abi2	Tet
chr1	60566292	60566442	151	*	Promoter (<=1kb)	1	60482292	60567104	84813	2	77300	662	ENSMUSG00000026014	Raph1	Ras association (RalGDS/AF-6) and pleckstrin homology domains 1	77300	0	gene_body	chr1:60566292-60566442	Raph1	Tet
chr1	60755849	60756185	337	*	Intron (ENSMUST00000132833.1/12487, intron 3 of 3)	1	60716800	60773359	56560	1	12487	39049	ENSMUSG00000026012	Cd28	CD28 antigen	12487	0	gene_body	chr1:60755849-60756185	Cd28	Tet
chr1	60755943	60756174	232	*	Intron (ENSMUST00000132833.1/12487, intron 3 of 3)	1	60716800	60773359	56560	1	12487	39143	ENSMUSG00000026012	Cd28	CD28 antigen	12487	0	gene_body	chr1:60755943-60756174	Cd28	Tet
chr1	60755912	60756076	165	*	Intron (ENSMUST00000132833.1/12487, intron 3 of 3)	1	60716800	60773359	56560	1	12487	39112	ENSMUSG00000026012	Cd28	CD28 antigen	12487	0	gene_body	chr1:60755912-60756076	Cd28	Tet
chr1	60755921	60756170	250	*	Intron (ENSMUST00000132833.1/12487, intron 3 of 3)	1	60716800	60773359	56560	1	12487	39121	ENSMUSG00000026012	Cd28	CD28 antigen	12487	0	gene_body	chr1:60755921-60756170	Cd28	Tet
chr1	60758207	60758529	323	*	Intron (ENSMUST00000132833.1/12487, intron 3 of 3)	1	60716800	60773359	56560	1	12487	41407	ENSMUSG00000026012	Cd28	CD28 antigen	12487	0	gene_body	chr1:60758207-60758529	Cd28	Tet
chr1	60758182	60758565	384	*	Intron (ENSMUST00000132833.1/12487, intron 3 of 3)	1	60716800	60773359	56560	1	12487	41382	ENSMUSG00000026012	Cd28	CD28 antigen	12487	0	gene_body	chr1:60758182-60758565	Cd28	Tet
chr1	60758238	60758451	214	*	Intron (ENSMUST00000132833.1/12487, intron 3 of 3)	1	60716800	60773359	56560	1	12487	41438	ENSMUSG00000026012	Cd28	CD28 antigen	12487	0	gene_body	chr1:60758238-60758451	Cd28	Tet
chr1	60758266	60758449	184	*	Intron (ENSMUST00000132833.1/12487, intron 3 of 3)	1	60716800	60773359	56560	1	12487	41466	ENSMUSG00000026012	Cd28	CD28 antigen	12487	0	gene_body	chr1:60758266-60758449	Cd28	Tet
chr1	60853438	60853700	263	*	Distal Intergenic	1	60887000	60915832	28833	1	12477	-33300	ENSMUSG00000026011	Ctla4	cytotoxic T-lymphocyte-associated protein 4	12477	0	Distal Intergenic	chr1:60853438-60853700	Ctla4	Tet
chr1	60868418	60868721	304	*	Distal Intergenic	1	60887000	60915832	28833	1	12477	-18279	ENSMUSG00000026011	Ctla4	cytotoxic T-lymphocyte-associated protein 4	12477	0	Distal Intergenic	chr1:60868418-60868721	Ctla4	Tet
chr1	60868433	60868591	159	*	Distal Intergenic	1	60887000	60915832	28833	1	12477	-18409	ENSMUSG00000026011	Ctla4	cytotoxic T-lymphocyte-associated protein 4	12477	0	Distal Intergenic	chr1:60868433-60868591	Ctla4	Tet
chr1	60902582	60902944	363	*	Intron (ENSMUST00000124816.1/12477, intron 3 of 3)	1	60887000	60915832	28833	1	12477	15582	ENSMUSG00000026011	Ctla4	cytotoxic T-lymphocyte-associated protein 4	12477	0	gene_body	chr1:60902582-60902944	Ctla4	Tet
chr1	60902489	60902832	344	*	Intron (ENSMUST00000124816.1/12477, intron 3 of 3)	1	60887000	60915832	28833	1	12477	15489	ENSMUSG00000026011	Ctla4	cytotoxic T-lymphocyte-associated protein 4	12477	0	gene_body	chr1:60902489-60902832	Ctla4	Tet
chr1	60913314	60913641	328	*	Exon (ENSMUST00000027164.8/12477, exon 3 of 4)	1	60887000	60915832	28833	1	12477	26314	ENSMUSG00000026011	Ctla4	cytotoxic T-lymphocyte-associated protein 4	12477	0	gene_body	chr1:60913314-60913641	Ctla4	Tet
chr1	60916358	60916755	398	*	Downstream (<1kb)	1	60887000	60915832	28833	1	12477	29358	ENSMUSG00000026011	Ctla4	cytotoxic T-lymphocyte-associated protein 4	12477	0	gene_body	chr1:60916358-60916755	Ctla4	Tet
chr1	60910956	60911115	160	*	Intron (ENSMUST00000124816.1/12477, intron 3 of 3)	1	60887000	60915832	28833	1	12477	23956	ENSMUSG00000026011	Ctla4	cytotoxic T-lymphocyte-associated protein 4	12477	0	gene_body	chr1:60910956-60911115	Ctla4	Tet
chr1	60913388	60913641	254	*	Intron (ENSMUST00000027164.8/12477, intron 3 of 3)	1	60887000	60915832	28833	1	12477	26388	ENSMUSG00000026011	Ctla4	cytotoxic T-lymphocyte-associated protein 4	12477	0	gene_body	chr1:60913388-60913641	Ctla4	Tet
chr1	60916447	60916731	285	*	Downstream (<1kb)	1	60887000	60915832	28833	1	12477	29447	ENSMUSG00000026011	Ctla4	cytotoxic T-lymphocyte-associated protein 4	12477	0	gene_body	chr1:60916447-60916731	Ctla4	Tet
chr1	60913407	60913585	179	*	Intron (ENSMUST00000027164.8/12477, intron 3 of 3)	1	60887000	60915832	28833	1	12477	26407	ENSMUSG00000026011	Ctla4	cytotoxic T-lymphocyte-associated protein 4	12477	0	gene_body	chr1:60913407-60913585	Ctla4	Tet
chr1	60913374	60913587	214	*	Intron (ENSMUST00000027164.8/12477, intron 3 of 3)	1	60887000	60915832	28833	1	12477	26374	ENSMUSG00000026011	Ctla4	cytotoxic T-lymphocyte-associated protein 4	12477	0	gene_body	chr1:60913374-60913587	Ctla4	Tet
chr1	60937027	60937318	292	*	Distal Intergenic	1	60977927	61000320	22394	1	54167	-40609	ENSMUSG00000026009	Icos	inducible T cell co-stimulator	12477;54167	0;0	Distal Intergenic	chr1:60937027-60937318	Icos	Tet
chr1	60941078	60941369	292	*	Distal Intergenic	1	60977927	61000320	22394	1	54167	-36558	ENSMUSG00000026009	Icos	inducible T cell co-stimulator	12477;54167	0;0	Distal Intergenic	chr1:60941078-60941369	Icos	Tet
chr1	60941061	60941327	267	*	Distal Intergenic	1	60977927	61000320	22394	1	54167	-36600	ENSMUSG00000026009	Icos	inducible T cell co-stimulator	12477;54167	0;0	Distal Intergenic	chr1:60941061-60941327	Icos	Tet
chr1	60985140	60985433	294	*	Intron (ENSMUST00000027162.11/54167, intron 1 of 3)	1	60977927	61000320	22394	1	54167	7213	ENSMUSG00000026009	Icos	inducible T cell co-stimulator	54167	0	gene_body	chr1:60985140-60985433	Icos	Tet
chr1	60990389	60990647	259	*	Exon (ENSMUST00000193733.1/ENSMUST00000193733.1, exon 1 of 1)	1	60977927	61000320	22394	1	54167	12462	ENSMUSG00000026009	Icos	inducible T cell co-stimulator	54167	0	gene_body	chr1:60990389-60990647	Icos	Tet
chr1	61016764	61016947	184	*	Distal Intergenic	1	60977927	61000320	22394	1	54167	38837	ENSMUSG00000026009	Icos	inducible T cell co-stimulator	54167	0	Distal Intergenic	chr1:61016764-61016947	Icos	Tet
chr1	61026808	61027045	238	*	Distal Intergenic	1	60977927	61000320	22394	1	54167	48881	ENSMUSG00000026009	Icos	inducible T cell co-stimulator	54167	0	Distal Intergenic	chr1:61026808-61027045	Icos	Tet
chr1	61027535	61027838	304	*	Distal Intergenic	1	60977927	61000320	22394	1	54167	49608	ENSMUSG00000026009	Icos	inducible T cell co-stimulator	54167	0	Distal Intergenic	chr1:61027535-61027838	Icos	Tet
chr1	61045914	61046655	742	*	Distal Intergenic	1	60977927	61000320	22394	1	54167	67987	ENSMUSG00000026009	Icos	inducible T cell co-stimulator	54167	0	Distal Intergenic	chr1:61045914-61046655	Icos	Tet
chr1	61046150	61046519	370	*	Distal Intergenic	1	60977927	61000320	22394	1	54167	68223	ENSMUSG00000026009	Icos	inducible T cell co-stimulator	54167	0	Distal Intergenic	chr1:61046150-61046519	Icos	Tet
chr1	61050390	61050636	247	*	Distal Intergenic	1	60977927	61000320	22394	1	54167	72463	ENSMUSG00000026009	Icos	inducible T cell co-stimulator			Distal Intergenic	chr1:61050390-61050636	Icos	Tet
chr1	61135634	61135937	304	*	Distal Intergenic	1	60977927	61000320	22394	1	54167	157707	ENSMUSG00000026009	Icos	inducible T cell co-stimulator			Distal Intergenic	chr1:61135634-61135937	Icos	Tet
chr1	61135657	61135866	210	*	Distal Intergenic	1	60977927	61000320	22394	1	54167	157730	ENSMUSG00000026009	Icos	inducible T cell co-stimulator			Distal Intergenic	chr1:61135657-61135866	Icos	Tet
chr1	62875805	62875954	150	*	Distal Intergenic	1	62703285	62818695	115411	1	18187	172520	ENSMUSG00000025969	Nrp2	neuropilin 2			Distal Intergenic	chr1:62875805-62875954	Nrp2	Tet
chr1	62875740	62876003	264	*	Distal Intergenic	1	62703285	62818695	115411	1	18187	172455	ENSMUSG00000025969	Nrp2	neuropilin 2			Distal Intergenic	chr1:62875740-62876003	Nrp2	Tet
chr1	64527751	64527917	167	*	Distal Intergenic	1	64532645	64604548	71904	1	12912	-4728	ENSMUSG00000025958	Creb1	cAMP responsive element binding protein 1	12912	-4728	Distal Intergenic	chr1:64527751-64527917	Creb1	Tet
chr1	64737335	64737502	168	*	Promoter (<=1kb)	1	64730558	64737751	7194	2	14367	249	ENSMUSG00000045005	Fzd5	frizzled class receptor 5	14367;227210;241075;69941	0;46880;219322;-46676	gene_body	chr1:64737335-64737502	Fzd5	Tet
chr1	64970699	64971040	342	*	Distal Intergenic	1	64785983	64956824	170842	2	241075	-13875	ENSMUSG00000051344	Plekhm3	pleckstrin homology domain containing, family M, member 3	241075;70861	-13875;61719	Distal Intergenic	chr1:64970699-64971040	Plekhm3	Tet
chr1	64970791	64970986	196	*	Distal Intergenic	1	64785983	64956824	170842	2	241075	-13967	ENSMUSG00000051344	Plekhm3	pleckstrin homology domain containing, family M, member 3	241075;70861	-13967;61773	Distal Intergenic	chr1:64970791-64970986	Plekhm3	Tet
chr1	64970717	64970970	254	*	Distal Intergenic	1	64785983	64956824	170842	2	241075	-13893	ENSMUSG00000051344	Plekhm3	pleckstrin homology domain containing, family M, member 3	241075;70861	-13893;61789	Distal Intergenic	chr1:64970717-64970970	Plekhm3	Tet
chr1	65178183	65178700	518	*	Intron (ENSMUST00000097709.10/15926, intron 1 of 8)	1	65158616	65186500	27885	2	15926	7800	ENSMUSG00000025950	Idh1	isocitrate dehydrogenase 1 (NADP+), soluble	15926;18711	0;-7983	gene_body	chr1:65178183-65178700	Idh1	Tet
chr1	65178257	65178618	362	*	Intron (ENSMUST00000097709.10/15926, intron 1 of 8)	1	65158616	65186500	27885	2	15926	7882	ENSMUSG00000025950	Idh1	isocitrate dehydrogenase 1 (NADP+), soluble	15926;18711	0;-8065	gene_body	chr1:65178257-65178618	Idh1	Tet
chr1	65178217	65178735	519	*	Intron (ENSMUST00000097709.10/15926, intron 1 of 8)	1	65158616	65186500	27885	2	15926	7765	ENSMUSG00000025950	Idh1	isocitrate dehydrogenase 1 (NADP+), soluble	15926;18711	0;-7948	gene_body	chr1:65178217-65178735	Idh1	Tet
chr1	65178201	65178773	573	*	Intron (ENSMUST00000097709.10/15926, intron 1 of 8)	1	65158616	65186500	27885	2	15926	7727	ENSMUSG00000025950	Idh1	isocitrate dehydrogenase 1 (NADP+), soluble	15926;18711	0;-7910	gene_body	chr1:65178201-65178773	Idh1	Tet
chr1	66862745	66863051	307	*	Promoter (<=1kb)	1	66830839	66863277	32439	2	11363	226	ENSMUSG00000026003	Acadl	acyl-Coenzyme A dehydrogenase, long-chain	11363;68691	0;-45183	gene_body	chr1:66862745-66863051	Acadl	Tet
chr1	69291366	69291676	311	*	Distal Intergenic	1	68032186	69108059	1075874	2	13869	-183307	ENSMUSG00000062209	Erbb4	erb-b2 receptor tyrosine kinase 4			Distal Intergenic	chr1:69291366-69291676	Erbb4	Tet
chr1	69291465	69291632	168	*	Distal Intergenic	1	68032186	69108059	1075874	2	13869	-183406	ENSMUSG00000062209	Erbb4	erb-b2 receptor tyrosine kinase 4			Distal Intergenic	chr1:69291465-69291632	Erbb4	Tet
chr1	69469348	69469651	304	*	Distal Intergenic	1	69531214	69687245	156032	2	22779	217594	ENSMUSG00000025997	Ikzf2	IKAROS family zinc finger 2			Distal Intergenic	chr1:69469348-69469651	Ikzf2	Tet
chr1	69498956	69499192	237	*	Distal Intergenic	1	69531214	69687245	156032	2	22779	188053	ENSMUSG00000025997	Ikzf2	IKAROS family zinc finger 2	22779	0	Distal Intergenic	chr1:69498956-69499192	Ikzf2	Tet
chr1	69537666	69537954	289	*	3' UTR	1	69531214	69687245	156032	2	22779	149291	ENSMUSG00000025997	Ikzf2	IKAROS family zinc finger 2	22779	0	gene_body	chr1:69537666-69537954	Ikzf2	Tet
chr1	69537709	69537869	161	*	3' UTR	1	69531214	69687245	156032	2	22779	149376	ENSMUSG00000025997	Ikzf2	IKAROS family zinc finger 2	22779	0	gene_body	chr1:69537709-69537869	Ikzf2	Tet
chr1	69544215	69544631	417	*	Intron (ENSMUST00000187100.1/ENSMUST00000187100.1, intron 3 of 3)	1	69531214	69687245	156032	2	22779	142614	ENSMUSG00000025997	Ikzf2	IKAROS family zinc finger 2	22779	0	gene_body	chr1:69544215-69544631	Ikzf2	Tet
chr1	69544250	69544600	351	*	Intron (ENSMUST00000187100.1/ENSMUST00000187100.1, intron 3 of 3)	1	69531214	69687245	156032	2	22779	142645	ENSMUSG00000025997	Ikzf2	IKAROS family zinc finger 2	22779	0	gene_body	chr1:69544250-69544600	Ikzf2	Tet
chr1	69544287	69544568	282	*	Intron (ENSMUST00000187100.1/ENSMUST00000187100.1, intron 3 of 3)	1	69531214	69687245	156032	2	22779	142677	ENSMUSG00000025997	Ikzf2	IKAROS family zinc finger 2	22779	0	gene_body	chr1:69544287-69544568	Ikzf2	Tet
chr1	69544368	69544543	176	*	Intron (ENSMUST00000187100.1/ENSMUST00000187100.1, intron 3 of 3)	1	69531214	69687245	156032	2	22779	142702	ENSMUSG00000025997	Ikzf2	IKAROS family zinc finger 2	22779	0	gene_body	chr1:69544368-69544543	Ikzf2	Tet
chr1	69681075	69681371	297	*	Intron (ENSMUST00000027146.8/22779, intron 3 of 7)	1	69531214	69687245	156032	2	22779	5874	ENSMUSG00000025997	Ikzf2	IKAROS family zinc finger 2	22779	0	gene_body	chr1:69681075-69681371	Ikzf2	Tet
chr1	69759593	69759911	319	*	Distal Intergenic	1	69826970	70725132	898163	1	66722	-67059	ENSMUSG00000053153	Spag16	sperm associated antigen 16			Distal Intergenic	chr1:69759593-69759911	Spag16	Tet
chr1	71102292	71102576	285	*	Promoter (<=1kb)	1	71027498	71103146	75649	2	12021	570	ENSMUSG00000026196	Bard1	BRCA1 associated RING domain 1	12021	0	gene_body	chr1:71102292-71102576	Bard1	Tet
chr1	71102362	71102725	364	*	Promoter (<=1kb)	1	71027498	71103146	75649	2	12021	421	ENSMUSG00000026196	Bard1	BRCA1 associated RING domain 1	12021	0	gene_body	chr1:71102362-71102725	Bard1	Tet
chr1	74227397	74227662	266	*	Distal Intergenic	1	74236084	74268209	32126	1	76709	-8422	ENSMUSG00000006304	Arpc2	actin related protein 2/3 complex, subunit 2	100316687;227288;76709	-20777;-32766;0	Distal Intergenic	chr1:74227397-74227662	Arpc2	Tet
chr1	74227428	74227627	200	*	Distal Intergenic	1	74236084	74268209	32126	1	76709	-8457	ENSMUSG00000006304	Arpc2	actin related protein 2/3 complex, subunit 2	100316687;227288;76709	-20808;-32797;0	Distal Intergenic	chr1:74227428-74227627	Arpc2	Tet
chr1	74227430	74227654	225	*	Distal Intergenic	1	74236084	74268209	32126	1	76709	-8430	ENSMUSG00000006304	Arpc2	actin related protein 2/3 complex, subunit 2	100316687;227288;76709	-20810;-32799;0	Distal Intergenic	chr1:74227430-74227654	Arpc2	Tet
chr1	74236938	74237088	151	*	Promoter (<=1kb)	1	74236084	74268209	32126	1	76709	854	ENSMUSG00000006304	Arpc2	actin related protein 2/3 complex, subunit 2	100316687;227288;227289;227290;56695;76709	-30318;-42307;-41462;47650;-47842;0	gene_body	chr1:74236938-74237088	Arpc2	Tet
chr1	74236811	74236973	163	*	Promoter (<=1kb)	1	74236084	74268209	32126	1	76709	727	ENSMUSG00000006304	Arpc2	actin related protein 2/3 complex, subunit 2	100316687;227288;227289;227290;56695;76709	-30191;-42180;-41577;47765;-47957;0	gene_body	chr1:74236811-74236973	Arpc2	Tet
chr1	74248874	74249191	318	*	Intron (ENSMUST00000113820.8/76709, intron 4 of 10)	1	74236084	74268209	32126	1	76709	12790	ENSMUSG00000006304	Arpc2	actin related protein 2/3 complex, subunit 2	100316687;227289;227290;56695;69660;76709	-42254;-29359;35547;-35739;56431;0	gene_body	chr1:74248874-74249191	Arpc2	Tet
chr1	74248960	74249172	213	*	Intron (ENSMUST00000113820.8/76709, intron 4 of 10)	1	74236084	74268209	32126	1	76709	12876	ENSMUSG00000006304	Arpc2	actin related protein 2/3 complex, subunit 2	100316687;227289;227290;56695;69660;76709	-42340;-29378;35566;-35758;56450;0	gene_body	chr1:74248960-74249172	Arpc2	Tet
chr1	74248890	74249151	262	*	Intron (ENSMUST00000113820.8/76709, intron 4 of 10)	1	74236084	74268209	32126	1	76709	12806	ENSMUSG00000006304	Arpc2	actin related protein 2/3 complex, subunit 2	100316687;227289;227290;56695;69660;76709	-42270;-29399;35587;-35779;56471;0	gene_body	chr1:74248890-74249151	Arpc2	Tet
chr1	74262552	74262886	335	*	Exon (ENSMUST00000113820.8/76709, exon 8 of 11)	1	74278550	74279624	1075	1	227289	-15664	ENSMUSG00000064272	Gpbar1	G protein-coupled bile acid receptor 1	227289;227290;56695;69660;76709	-15664;21852;-22044;42736;0	gene_body	chr1:74262552-74262886	Gpbar1	Tet
chr1	74262648	74262871	224	*	Intron (ENSMUST00000113820.8/76709, intron 8 of 10)	1	74278550	74279624	1075	1	227289	-15679	ENSMUSG00000064272	Gpbar1	G protein-coupled bile acid receptor 1	227289;227290;56695;69660;76709	-15679;21867;-22059;42751;0	gene_body	chr1:74262648-74262871	Gpbar1	Tet
chr1	74386726	74387176	451	*	Downstream (<1kb)	1	74391509	74397285	5777	1	227292	-4333	ENSMUSG00000026176	Ctdsp1	CTD (carboxy-terminal domain, RNA polymerase II, polypeptide A) small phosphatase 1	18173;22349;227292;241112;319651;387219;56695	11531;-22200;-4333;24618;157108;-7134;101796	gene_body	chr1:74386726-74387176	Ctdsp1	Tet
chr1	74386790	74387043	254	*	Downstream (<1kb)	1	74391509	74397285	5777	1	227292	-4466	ENSMUSG00000026176	Ctdsp1	CTD (carboxy-terminal domain, RNA polymerase II, polypeptide A) small phosphatase 1	18173;22349;227292;241112;319651;387219;56695	11595;-22333;-4466;24682;157241;-7267;101860	gene_body	chr1:74386790-74387043	Ctdsp1	Tet
chr1	74386714	74387047	334	*	Downstream (<1kb)	1	74391509	74397285	5777	1	227292	-4462	ENSMUSG00000026176	Ctdsp1	CTD (carboxy-terminal domain, RNA polymerase II, polypeptide A) small phosphatase 1	18173;22349;227292;241112;319651;387219;56695	11519;-22329;-4462;24606;157237;-7263;101784	gene_body	chr1:74386714-74387047	Ctdsp1	Tet
chr1	74397348	74397683	336	*	Downstream (<1kb)	1	74394310	74394394	85	1	387219	3038	ENSMUSG00000065468	Mir26b	microRNA 26b	18173;22349;227292;241112;319651;387219;56695	22153;-11693;5839;35240;146601;3038;112418	gene_body	chr1:74397348-74397683	Mir26b	Tet
chr1	74398059	74398357	299	*	Downstream (<1kb)	1	74394310	74394394	85	1	387219	3749	ENSMUSG00000065468	Mir26b	microRNA 26b	18173;22349;227292;241112;319651;387219;56695	22864;-11019;6550;35951;145927;3749;113129	gene_body	chr1:74398059-74398357	Mir26b	Tet
chr1	74397370	74397624	255	*	Downstream (<1kb)	1	74394310	74394394	85	1	387219	3060	ENSMUSG00000065468	Mir26b	microRNA 26b	18173;22349;227292;241112;319651;387219;56695	22175;-11752;5861;35262;146660;3060;112440	gene_body	chr1:74397370-74397624	Mir26b	Tet
chr1	74802921	74803333	413	*	3' UTR	1	74791516	74804179	12664	1	22409	11405	ENSMUSG00000026167	Wnt10a	wingless-type MMTV integration site family, member 10A	102634844;22409;22420	-47562;0;31029	gene_body	chr1:74802921-74803333	Wnt10a	Tet
chr1	74802986	74803314	329	*	3' UTR	1	74791516	74804179	12664	1	22409	11470	ENSMUSG00000026167	Wnt10a	wingless-type MMTV integration site family, member 10A	102634844;22409;22420	-47581;0;31094	gene_body	chr1:74802986-74803314	Wnt10a	Tet
chr1	74803110	74803523	414	*	3' UTR	1	74791516	74804179	12664	1	22409	11594	ENSMUSG00000026167	Wnt10a	wingless-type MMTV integration site family, member 10A	102634844;22409;22420	-47372;0;31218	gene_body	chr1:74803110-74803523	Wnt10a	Tet
chr1	74806551	74806932	382	*	Downstream (2-3kb)	1	74791516	74804179	12664	1	22409	15035	ENSMUSG00000026167	Wnt10a	wingless-type MMTV integration site family, member 10A	102634844;12570;22409;22420	-43963;-48002;0;34659	gene_body	chr1:74806551-74806932	Wnt10a	Tet
chr1	74806660	74806924	265	*	Downstream (2-3kb)	1	74791516	74804179	12664	1	22409	15144	ENSMUSG00000026167	Wnt10a	wingless-type MMTV integration site family, member 10A	102634844;12570;22409;22420	-43971;-48010;0;34768	gene_body	chr1:74806660-74806924	Wnt10a	Tet
chr1	74816857	74817237	381	*	Distal Intergenic	1	74791516	74804179	12664	1	22409	25341	ENSMUSG00000026167	Wnt10a	wingless-type MMTV integration site family, member 10A	102634844;12570;22409;22420	-33658;-37697;0;44965	Distal Intergenic	chr1:74816857-74817237	Wnt10a	Tet
chr1	74816922	74817196	275	*	Distal Intergenic	1	74791516	74804179	12664	1	22409	25406	ENSMUSG00000026167	Wnt10a	wingless-type MMTV integration site family, member 10A	102634844;12570;22409;22420	-33699;-37738;0;45030	Distal Intergenic	chr1:74816922-74817196	Wnt10a	Tet
chr1	74816921	74817102	182	*	Distal Intergenic	1	74791516	74804179	12664	1	22409	25405	ENSMUSG00000026167	Wnt10a	wingless-type MMTV integration site family, member 10A	102634844;12570;22409;22420	-33793;-37832;0;45029	Distal Intergenic	chr1:74816921-74817102	Wnt10a	Tet
chr1	75124637	75124995	359	*	Distal Intergenic	1	75125541	75133890	8350	2	22626	8895	ENSMUSG00000026205	Slc23a3	solute carrier family 23 (nucleobase transporters), member 3	22626;227298;68818;69171;74104	8895;-17783;-43651;17716;60151	Distal Intergenic	chr1:75124637-75124995	Slc23a3	Tet
chr1	78422596	78422915	320	*	Intron (ENSMUST00000170217.7/23874, intron 17 of 17)	1	78417975	78488897	70923	2	23874	65982	ENSMUSG00000026245	Farsb	phenylalanyl-tRNA synthetase, beta subunit	23874;433323	0;112251	gene_body	chr1:78422596-78422915	Farsb	Tet
chr1	78422650	78422918	269	*	Intron (ENSMUST00000170217.7/23874, intron 17 of 17)	1	78417975	78488897	70923	2	23874	65979	ENSMUSG00000026245	Farsb	phenylalanyl-tRNA synthetase, beta subunit	23874;433323	0;112305	gene_body	chr1:78422650-78422918	Farsb	Tet
chr1	78422667	78422885	219	*	Intron (ENSMUST00000170217.7/23874, intron 17 of 17)	1	78417975	78488897	70923	2	23874	66012	ENSMUSG00000026245	Farsb	phenylalanyl-tRNA synthetase, beta subunit	23874;433323	0;112322	gene_body	chr1:78422667-78422885	Farsb	Tet
chr1	78454470	78454899	430	*	3' UTR	1	78417975	78488897	70923	2	23874	33998	ENSMUSG00000026245	Farsb	phenylalanyl-tRNA synthetase, beta subunit	23874;433323	0;144125	gene_body	chr1:78454470-78454899	Farsb	Tet
chr1	78454661	78454899	239	*	3' UTR	1	78417975	78488897	70923	2	23874	33998	ENSMUSG00000026245	Farsb	phenylalanyl-tRNA synthetase, beta subunit	23874;433323	0;144316	gene_body	chr1:78454661-78454899	Farsb	Tet
chr1	78538437	78538741	305	*	Downstream (<1kb)	1	78510991	78538173	27183	1	68393	27446	ENSMUSG00000012187	Mogat1	monoacylglycerol O-acyltransferase 1	23874;68393	0;27446	gene_body	chr1:78538437-78538741	Mogat1	Tet
chr1	79581353	79581740	388	*	Distal Intergenic	1	79606876	79671972	65097	2	252903	90232	ENSMUSG00000054702	Ap1s3	adaptor-related protein complex AP-1, sigma 3	252903	90232	Distal Intergenic	chr1:79581353-79581740	Ap1s3	Tet
chr1	79581472	79581724	253	*	Distal Intergenic	1	79606876	79671972	65097	2	252903	90248	ENSMUSG00000054702	Ap1s3	adaptor-related protein complex AP-1, sigma 3	252903	90248	Distal Intergenic	chr1:79581472-79581724	Ap1s3	Tet
chr1	79711357	79711738	382	*	Intron (ENSMUST00000113512.7/69368, intron 8 of 11)	1	79606876	79671972	65097	2	252903	-39385	ENSMUSG00000054702	Ap1s3	adaptor-related protein complex AP-1, sigma 3	252903;69368	-39385;0	gene_body	chr1:79711357-79711738	Ap1s3	Tet
chr1	79750143	79750362	220	*	Intron (ENSMUST00000113512.7/69368, intron 1 of 11)	1	79776018	79781445	5428	1	69163	-25656	ENSMUSG00000026248	Mrpl44	mitochondrial ribosomal protein L44	20720;69163;69368	110818;-25656;0	gene_body	chr1:79750143-79750362	Mrpl44	Tet
chr1	79750172	79750358	187	*	Intron (ENSMUST00000113512.7/69368, intron 1 of 11)	1	79776018	79781445	5428	1	69163	-25660	ENSMUSG00000026248	Mrpl44	mitochondrial ribosomal protein L44	20720;69163;69368	110822;-25660;0	gene_body	chr1:79750172-79750358	Mrpl44	Tet
chr1	79750180	79750423	244	*	Intron (ENSMUST00000113512.7/69368, intron 1 of 11)	1	79776018	79781445	5428	1	69163	-25595	ENSMUSG00000026248	Mrpl44	mitochondrial ribosomal protein L44	20720;69163;69368	110757;-25595;0	gene_body	chr1:79750180-79750423	Mrpl44	Tet
chr1	80389445	80389750	306	*	Distal Intergenic	1	80264923	80340480	75558	2	26554	-48965	ENSMUSG00000004364	Cul3	cullin 3	26554	-48965	Distal Intergenic	chr1:80389445-80389750	Cul3	Tet
chr1	80441023	80441207	185	*	Distal Intergenic	1	80445932	80479867	33936	1	72208	-4725	ENSMUSG00000101483	1700016L21Rik	RIKEN cDNA 1700016L21 gene	72208	-4725	Distal Intergenic	chr1:80441023-80441207	1700016L21Rik	Tet
chr1	80441015	80441215	201	*	Distal Intergenic	1	80445932	80479867	33936	1	72208	-4717	ENSMUSG00000101483	1700016L21Rik	RIKEN cDNA 1700016L21 gene	72208	-4717	Distal Intergenic	chr1:80441015-80441215	1700016L21Rik	Tet
chr1	80746155	80746629	475	*	Intron (ENSMUST00000077946.11/210293, intron 1 of 55)	1	80501073	80758527	257455	2	210293	11898	ENSMUSG00000038608	Dock10	dedicator of cytokinesis 10	210293	0	gene_body	chr1:80746155-80746629	Dock10	Tet
chr1	80747167	80747345	179	*	Exon (ENSMUST00000195842.1/ENSMUST00000195842.1, exon 1 of 1)	1	80501073	80758527	257455	2	210293	11182	ENSMUSG00000038608	Dock10	dedicator of cytokinesis 10	210293	0	gene_body	chr1:80747167-80747345	Dock10	Tet
chr1	80746203	80746611	409	*	Intron (ENSMUST00000077946.11/210293, intron 1 of 55)	1	80501073	80758527	257455	2	210293	11916	ENSMUSG00000038608	Dock10	dedicator of cytokinesis 10	210293	0	gene_body	chr1:80746203-80746611	Dock10	Tet
chr1	80746322	80746587	266	*	Intron (ENSMUST00000077946.11/210293, intron 1 of 55)	1	80501073	80758527	257455	2	210293	11940	ENSMUSG00000038608	Dock10	dedicator of cytokinesis 10	210293	0	gene_body	chr1:80746322-80746587	Dock10	Tet
chr1	80757417	80757708	292	*	Promoter (<=1kb)	1	80501073	80758527	257455	2	210293	819	ENSMUSG00000038608	Dock10	dedicator of cytokinesis 10	210293	0	gene_body	chr1:80757417-80757708	Dock10	Tet
chr1	80757932	80758142	211	*	Promoter (<=1kb)	1	80501073	80758527	257455	2	210293	385	ENSMUSG00000038608	Dock10	dedicator of cytokinesis 10	210293	0	gene_body	chr1:80757932-80758142	Dock10	Tet
chr1	80757413	80757630	218	*	Promoter (<=1kb)	1	80501073	80758527	257455	2	210293	897	ENSMUSG00000038608	Dock10	dedicator of cytokinesis 10	210293	0	gene_body	chr1:80757413-80757630	Dock10	Tet
chr1	80757486	80757666	181	*	Promoter (<=1kb)	1	80501073	80758527	257455	2	210293	861	ENSMUSG00000038608	Dock10	dedicator of cytokinesis 10	210293	0	gene_body	chr1:80757486-80757666	Dock10	Tet
chr1	82283041	82283616	576	*	Intron (ENSMUST00000069799.2/16367, intron 1 of 1)	1	82233101	82291416	58316	2	16367	7800	ENSMUSG00000055980	Irs1	insulin receptor substrate 1	16367;76867	0;-32836	gene_body	chr1:82283041-82283616	Irs1	Tet
chr1	82283135	82283507	373	*	Intron (ENSMUST00000069799.2/16367, intron 1 of 1)	1	82233101	82291416	58316	2	16367	7909	ENSMUSG00000055980	Irs1	insulin receptor substrate 1	16367;76867	0;-32945	gene_body	chr1:82283135-82283507	Irs1	Tet
chr1	82283169	82283558	390	*	Intron (ENSMUST00000069799.2/16367, intron 1 of 1)	1	82233101	82291416	58316	2	16367	7858	ENSMUSG00000055980	Irs1	insulin receptor substrate 1	16367;76867	0;-32894	gene_body	chr1:82283169-82283558	Irs1	Tet
chr1	82283154	82283459	306	*	Intron (ENSMUST00000069799.2/16367, intron 1 of 1)	1	82233101	82291416	58316	2	16367	7957	ENSMUSG00000055980	Irs1	insulin receptor substrate 1	16367;76867	0;-32993	gene_body	chr1:82283154-82283459	Irs1	Tet
chr1	82831619	82831869	251	*	Distal Intergenic	1	82839483	82901182	61700	1	15463	-7614	ENSMUSG00000026159	Agfg1	ArfGAP with FG repeats 1	15463	0	Distal Intergenic	chr1:82831619-82831869	Agfg1	Tet
chr1	82831931	82832183	253	*	Distal Intergenic	1	82839483	82901182	61700	1	15463	-7300	ENSMUSG00000026159	Agfg1	ArfGAP with FG repeats 1	15463	0	Distal Intergenic	chr1:82831931-82832183	Agfg1	Tet
chr1	82832453	82832948	496	*	Distal Intergenic	1	82839483	82901182	61700	1	15463	-6535	ENSMUSG00000026159	Agfg1	ArfGAP with FG repeats 1	15463	0	Distal Intergenic	chr1:82832453-82832948	Agfg1	Tet
chr1	82833645	82833842	198	*	Distal Intergenic	1	82839483	82901182	61700	1	15463	-5641	ENSMUSG00000026159	Agfg1	ArfGAP with FG repeats 1	15463	0	Distal Intergenic	chr1:82833645-82833842	Agfg1	Tet
chr1	82836337	82836771	435	*	Distal Intergenic	1	82839483	82901182	61700	1	15463	-2712	ENSMUSG00000026159	Agfg1	ArfGAP with FG repeats 1	15463	0	Distal Intergenic	chr1:82836337-82836771	Agfg1	Tet
chr1	82832501	82832985	485	*	Distal Intergenic	1	82839483	82901182	61700	1	15463	-6498	ENSMUSG00000026159	Agfg1	ArfGAP with FG repeats 1	15463	0	Distal Intergenic	chr1:82832501-82832985	Agfg1	Tet
chr1	82832496	82832700	205	*	Distal Intergenic	1	82839483	82901182	61700	1	15463	-6783	ENSMUSG00000026159	Agfg1	ArfGAP with FG repeats 1	15463	0	Distal Intergenic	chr1:82832496-82832700	Agfg1	Tet
chr1	82836618	82836782	165	*	Distal Intergenic	1	82839483	82901182	61700	1	15463	-2701	ENSMUSG00000026159	Agfg1	ArfGAP with FG repeats 1	15463	0	Distal Intergenic	chr1:82836618-82836782	Agfg1	Tet
chr1	82879268	82879485	218	*	Intron (ENSMUST00000189220.6/15463, intron 5 of 12)	1	82839483	82901182	61700	1	15463	39785	ENSMUSG00000026159	Agfg1	ArfGAP with FG repeats 1	15463	0	gene_body	chr1:82879268-82879485	Agfg1	Tet
chr1	82974059	82974306	248	*	Distal Intergenic	1	83012523	83038448	25926	2	80721	64142	ENSMUSG00000038496	Slc19a3	solute carrier family 19, member 3	80721	64142	Distal Intergenic	chr1:82974059-82974306	Slc19a3	Tet
chr1	83077198	83077490	293	*	Distal Intergenic	1	83060930	83061921	992	1	71386	16268	ENSMUSG00000101315	Krtap28-13	keratin associated protein 28-13	20297;71386;80721	-39276;16268;-38750	Distal Intergenic	chr1:83077198-83077490	Krtap28-13	Tet
chr1	85668026	85668200	175	*	Intron (ENSMUST00000155094.7/20684, intron 6 of 16)	1	85649988	85709998	60011	1	20684	18038	ENSMUSG00000026222	Sp100	nuclear antigen Sp100	20684;319997;434484	0;0;67648	gene_body	chr1:85668026-85668200	Sp100	Tet
chr1	85687402	85687698	297	*	Intron (ENSMUST00000155094.7/20684, intron 11 of 16)	1	85649988	85709998	60011	1	20684	37414	ENSMUSG00000026222	Sp100	nuclear antigen Sp100	20684;319997;434484	0;0;87024	gene_body	chr1:85687402-85687698	Sp100	Tet
chr1	85687388	85687685	298	*	Intron (ENSMUST00000155094.7/20684, intron 11 of 16)	1	85649988	85709998	60011	1	20684	37400	ENSMUSG00000026222	Sp100	nuclear antigen Sp100	20684;319997;434484	0;0;87010	gene_body	chr1:85687388-85687685	Sp100	Tet
chr1	85687457	85687618	162	*	Intron (ENSMUST00000155094.7/20684, intron 11 of 16)	1	85649988	85709998	60011	1	20684	37469	ENSMUSG00000026222	Sp100	nuclear antigen Sp100	20684;319997;434484	0;0;87079	gene_body	chr1:85687457-85687618	Sp100	Tet
chr1	85703679	85703837	159	*	Intron (ENSMUST00000153574.7/20684, intron 16 of 16)	1	85751948	85752074	127	1	102466882	-48111	ENSMUSG00000098634	Mir8096	microRNA 8096	102466882;20684;319997	-48111;0;0	gene_body	chr1:85703679-85703837	Mir8096	Tet
chr1	85735769	85736061	293	*	Exon (ENSMUST00000159325.2/319997, exon 2 of 3)	1	85751948	85752074	127	1	102466882	-15887	ENSMUSG00000098634	Mir8096	microRNA 8096	102466882;20684;319997;77762	-15887;0;0;-39210	gene_body	chr1:85735769-85736061	Mir8096	Tet
chr1	85735745	85736134	390	*	Exon (ENSMUST00000159325.2/319997, exon 2 of 3)	1	85751948	85752074	127	1	102466882	-15814	ENSMUSG00000098634	Mir8096	microRNA 8096	102466882;20684;319997;77762	-15814;0;0;-39137	gene_body	chr1:85735745-85736134	Mir8096	Tet
chr1	85735734	85736004	271	*	Exon (ENSMUST00000159325.2/319997, exon 2 of 3)	1	85751948	85752074	127	1	102466882	-15944	ENSMUSG00000098634	Mir8096	microRNA 8096	102466882;20684;319997;77762	-15944;0;0;-39267	gene_body	chr1:85735734-85736004	Mir8096	Tet
chr1	85735865	85736074	210	*	Exon (ENSMUST00000159325.2/319997, exon 2 of 3)	1	85751948	85752074	127	1	102466882	-15874	ENSMUSG00000098634	Mir8096	microRNA 8096	102466882;20684;319997;77762	-15874;0;0;-39197	gene_body	chr1:85735865-85736074	Mir8096	Tet
chr1	85752393	85752622	230	*	Promoter (<=1kb)	1	85751948	85752074	127	1	102466882	445	ENSMUSG00000098634	Mir8096	microRNA 8096	102466882;12283;20684;319997;77762	445;0;0;0;-22649	gene_body	chr1:85752393-85752622	Mir8096	Tet
chr1	85838105	85838378	274	*	Intron (ENSMUST00000113360.7/12283, intron 4 of 8)	1	85793441	85851576	58136	1	12283	44664	ENSMUSG00000036707	Cab39	calcium binding protein 39	12283	0	gene_body	chr1:85838105-85838378	Cab39	Tet
chr1	85838142	85838347	206	*	Intron (ENSMUST00000113360.7/12283, intron 4 of 8)	1	85793441	85851576	58136	1	12283	44701	ENSMUSG00000036707	Cab39	calcium binding protein 39	12283	0	gene_body	chr1:85838142-85838347	Cab39	Tet
chr1	85838099	85838341	243	*	Intron (ENSMUST00000113360.7/12283, intron 4 of 8)	1	85793441	85851576	58136	1	12283	44658	ENSMUSG00000036707	Cab39	calcium binding protein 39	12283	0	gene_body	chr1:85838099-85838341	Cab39	Tet
chr1	85895444	85895771	328	*	Promoter (1-2kb)	1	85894281	85908675	14395	1	64294	1163	ENSMUSG00000026223	Itm2c	integral membrane protein 2C	12283;227326;64294;71141	0;0;0;-32712	gene_body	chr1:85895444-85895771	Itm2c	Tet
chr1	85896867	85897017	151	*	Intron (ENSMUST00000027425.15/64294, intron 1 of 5)	1	85894281	85908675	14395	1	64294	2586	ENSMUSG00000026223	Itm2c	integral membrane protein 2C	12283;227326;64294;71141	0;0;0;-31466	gene_body	chr1:85896867-85897017	Itm2c	Tet
chr1	85895525	85895680	156	*	Promoter (1-2kb)	1	85894281	85908675	14395	1	64294	1244	ENSMUSG00000026223	Itm2c	integral membrane protein 2C	12283;227326;64294;71141	0;0;0;-32803	gene_body	chr1:85895525-85895680	Itm2c	Tet
chr1	85957409	85957583	175	*	Intron (ENSMUST00000086975.5/227326, intron 1 of 1)	1	85938318	85961007	22690	2	227326	3424	ENSMUSG00000049608	Gpr55	G protein-coupled receptor 55	227326;64294;71141	0;0;28926	gene_body	chr1:85957409-85957583	Gpr55	Tet
chr1	85959629	85959802	174	*	Promoter (1-2kb)	1	85938318	85961007	22690	2	227326	1205	ENSMUSG00000049608	Gpr55	G protein-coupled receptor 55	227326;71141	0;31146	gene_body	chr1:85959629-85959802	Gpr55	Tet
chr1	86394338	86394619	282	*	Intron (ENSMUST00000212541.1/14767, intron 2 of 3)	1	86386303	86426228	39926	2	14767	31609	ENSMUSG00000026237	Nmur1	neuromedin U receptor 1	100303740;102465895;14767;17975;319336;71863;80828	-43037;-42211;0;-34938;34764;-31710;-38008	gene_body	chr1:86394338-86394619	Nmur1	Tet
chr1	86434199	86434848	650	*	Distal Intergenic	1	86426329	86428052	1724	1	71863	7870	ENSMUSG00000036574	Tex44	testis expressed 44	14767;71863	0;7870	Distal Intergenic	chr1:86434199-86434848	Tex44	Tet
chr1	86434336	86434826	491	*	Distal Intergenic	1	86426329	86428052	1724	1	71863	8007	ENSMUSG00000036574	Tex44	testis expressed 44	14767;71863	0;8007	Distal Intergenic	chr1:86434336-86434826	Tex44	Tet
chr1	86434242	86434767	526	*	Distal Intergenic	1	86426329	86428052	1724	1	71863	7913	ENSMUSG00000036574	Tex44	testis expressed 44	14767;71863	0;7913	Distal Intergenic	chr1:86434242-86434767	Tex44	Tet
chr1	86434306	86434554	249	*	Distal Intergenic	1	86426329	86428052	1724	1	71863	7977	ENSMUSG00000036574	Tex44	testis expressed 44	14767;71863	0;7977	Distal Intergenic	chr1:86434306-86434554	Tex44	Tet
chr1	86440565	86440790	226	*	Distal Intergenic	1	86426329	86428052	1724	1	71863	14236	ENSMUSG00000036574	Tex44	testis expressed 44	14767;71863	0;14236	Distal Intergenic	chr1:86440565-86440790	Tex44	Tet
chr1	86441485	86441701	217	*	Distal Intergenic	1	86426329	86428052	1724	1	71863	15156	ENSMUSG00000036574	Tex44	testis expressed 44	14767;71863	0;15156	Distal Intergenic	chr1:86441485-86441701	Tex44	Tet
chr1	86442131	86442848	718	*	Distal Intergenic	1	86426329	86428052	1724	1	71863	15802	ENSMUSG00000036574	Tex44	testis expressed 44	14767;71863	0;15802	Distal Intergenic	chr1:86442131-86442848	Tex44	Tet
chr1	86442149	86442370	222	*	Distal Intergenic	1	86426329	86428052	1724	1	71863	15820	ENSMUSG00000036574	Tex44	testis expressed 44	14767;71863	0;15820	Distal Intergenic	chr1:86442149-86442370	Tex44	Tet
chr1	86442428	86442722	295	*	Distal Intergenic	1	86426329	86428052	1724	1	71863	16099	ENSMUSG00000036574	Tex44	testis expressed 44	14767;71863	0;16099	Distal Intergenic	chr1:86442428-86442722	Tex44	Tet
chr1	86440604	86440775	172	*	Distal Intergenic	1	86426329	86428052	1724	1	71863	14275	ENSMUSG00000036574	Tex44	testis expressed 44	14767;71863	0;14275	Distal Intergenic	chr1:86440604-86440775	Tex44	Tet
chr1	86442157	86442330	174	*	Distal Intergenic	1	86426329	86428052	1724	1	71863	15828	ENSMUSG00000036574	Tex44	testis expressed 44	14767;71863	0;15828	Distal Intergenic	chr1:86442157-86442330	Tex44	Tet
chr1	86442426	86442708	283	*	Distal Intergenic	1	86426329	86428052	1724	1	71863	16097	ENSMUSG00000036574	Tex44	testis expressed 44	14767;71863	0;16097	Distal Intergenic	chr1:86442426-86442708	Tex44	Tet
chr1	86487242	86488023	782	*	Distal Intergenic	1	86526726	86530712	3987	1	19231	-38703	ENSMUSG00000026238	Ptma	prothymosin alpha	19231	0	Distal Intergenic	chr1:86487242-86488023	Ptma	Tet
chr1	86487222	86487949	728	*	Distal Intergenic	1	86526726	86530712	3987	1	19231	-38777	ENSMUSG00000026238	Ptma	prothymosin alpha	19231	0	Distal Intergenic	chr1:86487222-86487949	Ptma	Tet
chr1	86487269	86487945	677	*	Distal Intergenic	1	86526726	86530712	3987	1	19231	-38781	ENSMUSG00000026238	Ptma	prothymosin alpha	19231	0	Distal Intergenic	chr1:86487269-86487945	Ptma	Tet
chr1	86487260	86487540	281	*	Distal Intergenic	1	86526726	86530712	3987	1	19231	-39186	ENSMUSG00000026238	Ptma	prothymosin alpha	19231	0	Distal Intergenic	chr1:86487260-86487540	Ptma	Tet
chr1	86487679	86487838	160	*	Distal Intergenic	1	86526726	86530712	3987	1	19231	-38888	ENSMUSG00000026238	Ptma	prothymosin alpha	19231	0	Distal Intergenic	chr1:86487679-86487838	Ptma	Tet
chr1	86501600	86501848	249	*	Distal Intergenic	1	86526726	86530712	3987	1	19231	-24878	ENSMUSG00000026238	Ptma	prothymosin alpha	18582;19231	80781;0	Distal Intergenic	chr1:86501600-86501848	Ptma	Tet
chr1	86503932	86504706	775	*	Distal Intergenic	1	86526726	86530712	3987	1	19231	-22020	ENSMUSG00000026238	Ptma	prothymosin alpha	18582;19231	77923;0	Distal Intergenic	chr1:86503932-86504706	Ptma	Tet
chr1	86504055	86504235	181	*	Distal Intergenic	1	86526726	86530712	3987	1	19231	-22491	ENSMUSG00000026238	Ptma	prothymosin alpha	18582;19231	78394;0	Distal Intergenic	chr1:86504055-86504235	Ptma	Tet
chr1	86504488	86504654	167	*	Distal Intergenic	1	86526726	86530712	3987	1	19231	-22072	ENSMUSG00000026238	Ptma	prothymosin alpha	18582;19231	77975;0	Distal Intergenic	chr1:86504488-86504654	Ptma	Tet
chr1	86504003	86504648	646	*	Distal Intergenic	1	86526726	86530712	3987	1	19231	-22078	ENSMUSG00000026238	Ptma	prothymosin alpha	18582;19231	77981;0	Distal Intergenic	chr1:86504003-86504648	Ptma	Tet
chr1	86509467	86509676	210	*	Distal Intergenic	1	86526726	86530712	3987	1	19231	-17050	ENSMUSG00000026238	Ptma	prothymosin alpha	18582;19231	72953;0	Distal Intergenic	chr1:86509467-86509676	Ptma	Tet
chr1	86528126	86528419	294	*	Promoter (1-2kb)	1	86526726	86530712	3987	1	19231	1400	ENSMUSG00000026238	Ptma	prothymosin alpha	18582;19231	54210;0	gene_body	chr1:86528126-86528419	Ptma	Tet
chr1	86528220	86528373	154	*	Promoter (1-2kb)	1	86526726	86530712	3987	1	19231	1494	ENSMUSG00000026238	Ptma	prothymosin alpha	18582;19231	54256;0	gene_body	chr1:86528220-86528373	Ptma	Tet
chr1	86528086	86528389	304	*	Promoter (1-2kb)	1	86526726	86530712	3987	1	19231	1360	ENSMUSG00000026238	Ptma	prothymosin alpha	18582;19231	54240;0	gene_body	chr1:86528086-86528389	Ptma	Tet
chr1	87327502	87327652	151	*	Promoter (<=1kb)	1	87326998	87450796	123799	1	227331	504	ENSMUSG00000048000	Gigyf2	GRB10 interacting GYF protein 2	227331;98363	0;63139	gene_body	chr1:87327502-87327652	Gigyf2	Tet
chr1	87607425	87607994	570	*	Distal Intergenic	1	87620312	87720507	100196	1	16331	-12318	ENSMUSG00000026288	Inpp5d	inositol polyphosphate-5-phosphatase D	16331;23956;53972	0;97536;-33555	Distal Intergenic	chr1:87607425-87607994	Inpp5d	Tet
chr1	87607505	87607976	472	*	Distal Intergenic	1	87620312	87720507	100196	1	16331	-12336	ENSMUSG00000026288	Inpp5d	inositol polyphosphate-5-phosphatase D	16331;23956;53972	0;97616;-33635	Distal Intergenic	chr1:87607505-87607976	Inpp5d	Tet
chr1	87607500	87607969	470	*	Distal Intergenic	1	87620312	87720507	100196	1	16331	-12343	ENSMUSG00000026288	Inpp5d	inositol polyphosphate-5-phosphatase D	16331;23956;53972	0;97611;-33630	Distal Intergenic	chr1:87607500-87607969	Inpp5d	Tet
chr1	87626347	87626815	469	*	Intron (ENSMUST00000169754.7/16331, intron 1 of 26)	1	87620312	87720507	100196	1	16331	6035	ENSMUSG00000026288	Inpp5d	inositol polyphosphate-5-phosphatase D	16331;23956	0;116458	gene_body	chr1:87626347-87626815	Inpp5d	Tet
chr1	87626397	87626788	392	*	Intron (ENSMUST00000169754.7/16331, intron 1 of 26)	1	87620312	87720507	100196	1	16331	6085	ENSMUSG00000026288	Inpp5d	inositol polyphosphate-5-phosphatase D	16331;23956	0;116508	gene_body	chr1:87626397-87626788	Inpp5d	Tet
chr1	87626452	87626808	357	*	Intron (ENSMUST00000169754.7/16331, intron 1 of 26)	1	87620312	87720507	100196	1	16331	6140	ENSMUSG00000026288	Inpp5d	inositol polyphosphate-5-phosphatase D	16331;23956	0;116563	gene_body	chr1:87626452-87626808	Inpp5d	Tet
chr1	87626421	87626735	315	*	Intron (ENSMUST00000169754.7/16331, intron 1 of 26)	1	87620312	87720507	100196	1	16331	6109	ENSMUSG00000026288	Inpp5d	inositol polyphosphate-5-phosphatase D	16331;23956	0;116532	gene_body	chr1:87626421-87626735	Inpp5d	Tet
chr1	87637022	87637817	796	*	Intron (ENSMUST00000169754.7/16331, intron 2 of 26)	1	87620312	87720507	100196	1	16331	16710	ENSMUSG00000026288	Inpp5d	inositol polyphosphate-5-phosphatase D	16331;23956	0;127133	gene_body	chr1:87637022-87637817	Inpp5d	Tet
chr1	87637135	87637474	340	*	Intron (ENSMUST00000169754.7/16331, intron 2 of 26)	1	87620312	87720507	100196	1	16331	16823	ENSMUSG00000026288	Inpp5d	inositol polyphosphate-5-phosphatase D	16331;23956	0;127246	gene_body	chr1:87637135-87637474	Inpp5d	Tet
chr1	87650671	87651046	376	*	Intron (ENSMUST00000169754.7/16331, intron 2 of 26)	1	87620312	87720507	100196	1	16331	30359	ENSMUSG00000026288	Inpp5d	inositol polyphosphate-5-phosphatase D	16331	0	gene_body	chr1:87650671-87651046	Inpp5d	Tet
chr1	87828304	87828575	272	*	Exon (ENSMUST00000155393.7/20215, exon 10 of 12)	1	87803680	87845158	41479	1	20215	24624	ENSMUSG00000056055	Sag	S-antigen, retina and pineal gland (arrestin)	100217415;100503175;20215;227333;77040	43748;25724;0;0;72434	gene_body	chr1:87828304-87828575	Sag	Tet
chr1	87828295	87828567	273	*	Exon (ENSMUST00000155393.7/20215, exon 10 of 12)	1	87803680	87845158	41479	1	20215	24615	ENSMUSG00000056055	Sag	S-antigen, retina and pineal gland (arrestin)	100217415;100503175;20215;227333;77040	43739;25732;0;0;72425	gene_body	chr1:87828295-87828567	Sag	Tet
chr1	87828263	87828544	282	*	Exon (ENSMUST00000155393.7/20215, exon 10 of 12)	1	87803680	87845158	41479	1	20215	24583	ENSMUSG00000056055	Sag	S-antigen, retina and pineal gland (arrestin)	100217415;100503175;20215;227333;77040	43707;25755;0;0;72393	gene_body	chr1:87828263-87828544	Sag	Tet
chr1	87847311	87847506	196	*	Downstream (2-3kb)	1	87853287	87945180	91894	1	227333	-5781	ENSMUSG00000070738	Dgkd	diacylglycerol kinase, delta	100503175;20215;227333	6793;0;0	gene_body	chr1:87847311-87847506	Dgkd	Tet
chr1	87876152	87876305	154	*	Intron (ENSMUST00000027517.13/227333, intron 1 of 29)	1	87853347	87854299	953	2	100503175	-21853	ENSMUSG00000101942	Gm19582	predicted gene, 19582	100503175;20215;227333	-21853;0;0	gene_body	chr1:87876152-87876305	Gm19582	Tet
chr1	88474617	88475033	417	*	Distal Intergenic	1	88499871	88510066	10196	2	14659	35033	ENSMUSG00000062310	Glrp1	glutamine repeat protein 1	14659;75396	35033;67656	Distal Intergenic	chr1:88474617-88475033	Glrp1	Tet
chr1	88474638	88475114	477	*	Distal Intergenic	1	88499871	88510066	10196	2	14659	34952	ENSMUSG00000062310	Glrp1	glutamine repeat protein 1	14659;75396	34952;67677	Distal Intergenic	chr1:88474638-88475114	Glrp1	Tet
chr1	88475506	88475856	351	*	Distal Intergenic	1	88499871	88510066	10196	2	14659	34210	ENSMUSG00000062310	Glrp1	glutamine repeat protein 1	14659;75396	34210;68545	Distal Intergenic	chr1:88475506-88475856	Glrp1	Tet
chr1	88475548	88475706	159	*	Distal Intergenic	1	88499871	88510066	10196	2	14659	34360	ENSMUSG00000062310	Glrp1	glutamine repeat protein 1	14659;75396	34360;68587	Distal Intergenic	chr1:88475548-88475706	Glrp1	Tet
chr1	88475501	88475734	234	*	Distal Intergenic	1	88499871	88510066	10196	2	14659	34332	ENSMUSG00000062310	Glrp1	glutamine repeat protein 1	14659;75396	34332;68540	Distal Intergenic	chr1:88475501-88475734	Glrp1	Tet
chr1	88575939	88576183	245	*	Distal Intergenic	1	88551517	88562167	10651	1	100503197	24422	ENSMUSG00000100798	Gm19589	predicted gene, 19589	100503197	24422	Distal Intergenic	chr1:88575939-88576183	Gm19589	Tet
chr1	88587333	88587886	554	*	Distal Intergenic	1	88551517	88562167	10651	1	100503197	35816	ENSMUSG00000100798	Gm19589	predicted gene, 19589	100503197	35816	Distal Intergenic	chr1:88587333-88587886	Gm19589	Tet
chr1	88587393	88587716	324	*	Distal Intergenic	1	88551517	88562167	10651	1	100503197	35876	ENSMUSG00000100798	Gm19589	predicted gene, 19589	100503197	35876	Distal Intergenic	chr1:88587393-88587716	Gm19589	Tet
chr1	88587414	88587747	334	*	Distal Intergenic	1	88551517	88562167	10651	1	100503197	35897	ENSMUSG00000100798	Gm19589	predicted gene, 19589	100503197	35897	Distal Intergenic	chr1:88587414-88587747	Gm19589	Tet
chr1	88590945	88591294	350	*	Distal Intergenic	1	88551517	88562167	10651	1	100503197	39428	ENSMUSG00000100798	Gm19589	predicted gene, 19589	100503197	39428	Distal Intergenic	chr1:88590945-88591294	Gm19589	Tet
chr1	88591005	88591276	272	*	Distal Intergenic	1	88551517	88562167	10651	1	100503197	39488	ENSMUSG00000100798	Gm19589	predicted gene, 19589	100503197	39488	Distal Intergenic	chr1:88591005-88591276	Gm19589	Tet
chr1	88622583	88622732	150	*	Distal Intergenic	1	88551517	88562167	10651	1	100503197	71066	ENSMUSG00000100798	Gm19589	predicted gene, 19589			Distal Intergenic	chr1:88622583-88622732	Gm19589	Tet
chr1	88709002	88709261	260	*	Distal Intergenic	1	88698225	88702221	3997	2	320982	-6781	ENSMUSG00000049866	Arl4c	ADP-ribosylation factor-like 4C	320982;78650	-6781;-45629	Distal Intergenic	chr1:88709002-88709261	Arl4c	Tet
chr1	88709057	88709241	185	*	Distal Intergenic	1	88698225	88702221	3997	2	320982	-6836	ENSMUSG00000049866	Arl4c	ADP-ribosylation factor-like 4C	320982;78650	-6836;-45649	Distal Intergenic	chr1:88709057-88709241	Arl4c	Tet
chr1	88720917	88721130	214	*	Distal Intergenic	1	88698225	88702221	3997	2	320982	-18696	ENSMUSG00000049866	Arl4c	ADP-ribosylation factor-like 4C	320982;78650	-18696;-33760	Distal Intergenic	chr1:88720917-88721130	Arl4c	Tet
chr1	89195047	89195199	153	*	Distal Intergenic	1	89070415	89155068	84654	1	98402	124632	ENSMUSG00000036206	Sh3bp4	SH3-domain binding protein 4	98402	124632	Distal Intergenic	chr1:89195047-89195199	Sh3bp4	Tet
chr1	91056561	91056710	150	*	Intron (ENSMUST00000189505.6/16978, intron 1 of 12)	1	90998737	91128944	130208	1	16978	57824	ENSMUSG00000026305	Lrrfip1	leucine rich repeat (in FLII) interacting protein 1	16978	0	gene_body	chr1:91056561-91056710	Lrrfip1	Tet
chr1	91057715	91057986	272	*	Intron (ENSMUST00000189505.6/16978, intron 1 of 12)	1	90998737	91128944	130208	1	16978	58978	ENSMUSG00000026305	Lrrfip1	leucine rich repeat (in FLII) interacting protein 1	16978	0	gene_body	chr1:91057715-91057986	Lrrfip1	Tet
chr1	91062503	91062777	275	*	Intron (ENSMUST00000189505.6/16978, intron 1 of 12)	1	90998737	91128944	130208	1	16978	63766	ENSMUSG00000026305	Lrrfip1	leucine rich repeat (in FLII) interacting protein 1	16978	0	gene_body	chr1:91062503-91062777	Lrrfip1	Tet
chr1	91065062	91065456	395	*	Intron (ENSMUST00000189505.6/16978, intron 1 of 12)	1	90998737	91128944	130208	1	16978	66325	ENSMUSG00000026305	Lrrfip1	leucine rich repeat (in FLII) interacting protein 1	16978	0	gene_body	chr1:91065062-91065456	Lrrfip1	Tet
chr1	91057780	91057932	153	*	Intron (ENSMUST00000189505.6/16978, intron 1 of 12)	1	90998737	91128944	130208	1	16978	59043	ENSMUSG00000026305	Lrrfip1	leucine rich repeat (in FLII) interacting protein 1	16978	0	gene_body	chr1:91057780-91057932	Lrrfip1	Tet
chr1	91062548	91062697	150	*	Intron (ENSMUST00000189505.6/16978, intron 1 of 12)	1	90998737	91128944	130208	1	16978	63811	ENSMUSG00000026305	Lrrfip1	leucine rich repeat (in FLII) interacting protein 1	16978	0	gene_body	chr1:91062548-91062697	Lrrfip1	Tet
chr1	91065100	91065376	277	*	Intron (ENSMUST00000189505.6/16978, intron 1 of 12)	1	90998737	91128944	130208	1	16978	66363	ENSMUSG00000026305	Lrrfip1	leucine rich repeat (in FLII) interacting protein 1	16978	0	gene_body	chr1:91065100-91065376	Lrrfip1	Tet
chr1	91062508	91062738	231	*	Intron (ENSMUST00000189505.6/16978, intron 1 of 12)	1	90998737	91128944	130208	1	16978	63771	ENSMUSG00000026305	Lrrfip1	leucine rich repeat (in FLII) interacting protein 1	16978	0	gene_body	chr1:91062508-91062738	Lrrfip1	Tet
chr1	91065105	91065413	309	*	Intron (ENSMUST00000189505.6/16978, intron 1 of 12)	1	90998737	91128944	130208	1	16978	66368	ENSMUSG00000026305	Lrrfip1	leucine rich repeat (in FLII) interacting protein 1	16978	0	gene_body	chr1:91065105-91065413	Lrrfip1	Tet
chr1	91065141	91065318	178	*	Intron (ENSMUST00000189505.6/16978, intron 1 of 12)	1	90998737	91128944	130208	1	16978	66404	ENSMUSG00000026305	Lrrfip1	leucine rich repeat (in FLII) interacting protein 1	16978	0	gene_body	chr1:91065141-91065318	Lrrfip1	Tet
chr1	91095202	91095675	474	*	Intron (ENSMUST00000189505.6/16978, intron 8 of 12)	1	91145101	91170795	25695	1	329207	-49426	ENSMUSG00000070732	Rbm44	RNA binding motif protein 44	16978;329207	0;-49426	gene_body	chr1:91095202-91095675	Rbm44	Tet
chr1	91095413	91095665	253	*	Intron (ENSMUST00000189505.6/16978, intron 8 of 12)	1	91145101	91170795	25695	1	329207	-49436	ENSMUSG00000070732	Rbm44	RNA binding motif protein 44	16978;329207	0;-49436	gene_body	chr1:91095413-91095665	Rbm44	Tet
chr1	91098956	91099110	155	*	Intron (ENSMUST00000189505.6/16978, intron 8 of 12)	1	91145101	91170795	25695	1	329207	-45991	ENSMUSG00000070732	Rbm44	RNA binding motif protein 44	16978;329207	0;-45991	gene_body	chr1:91098956-91099110	Rbm44	Tet
chr1	91193280	91193658	379	*	Intron (ENSMUST00000165855.7/51801, intron 1 of 2)	1	91179822	91225196	45375	1	51801	13458	ENSMUSG00000034353	Ramp1	receptor (calcitonin) activity modifying protein 1	329207;51801	48179;0	gene_body	chr1:91193280-91193658	Ramp1	Tet
chr1	91193339	91193659	321	*	Intron (ENSMUST00000165855.7/51801, intron 1 of 2)	1	91179822	91225196	45375	1	51801	13517	ENSMUSG00000034353	Ramp1	receptor (calcitonin) activity modifying protein 1	329207;51801	48238;0	gene_body	chr1:91193339-91193659	Ramp1	Tet
chr1	91193376	91193570	195	*	Intron (ENSMUST00000165855.7/51801, intron 1 of 2)	1	91179822	91225196	45375	1	51801	13554	ENSMUSG00000034353	Ramp1	receptor (calcitonin) activity modifying protein 1	329207;51801	48275;0	gene_body	chr1:91193376-91193570	Ramp1	Tet
chr1	91259865	91260079	215	*	Intron (ENSMUST00000188576.1/67921, intron 2 of 4)	1	91250304	91290337	40034	1	67921	9561	ENSMUSG00000034343	Ube2f	ubiquitin-conjugating enzyme E2F (putative)	50880;51801;67921	-38259;0;0	gene_body	chr1:91259865-91260079	Ube2f	Tet
chr1	91984662	91984812	151	*	Exon (ENSMUST00000097644.8/208727, exon 10 of 27)	1	91801461	91848028	46568	1	13345	183201	ENSMUSG00000007805	Twist2	twist basic helix-loop-helix transcription factor 2	208727	0	gene_body	chr1:91984662-91984812	Twist2	Tet
chr1	92058799	92059031	233	*	Intron (ENSMUST00000097644.8/208727, intron 2 of 26)	1	91928779	92195699	266921	2	208727	136668	ENSMUSG00000026313	Hdac4	histone deacetylase 4	208727	0	gene_body	chr1:92058799-92059031	Hdac4	Tet
chr1	92064260	92064781	522	*	Intron (ENSMUST00000097644.8/208727, intron 2 of 26)	1	91928779	92195699	266921	2	208727	130918	ENSMUSG00000026313	Hdac4	histone deacetylase 4	208727	0	gene_body	chr1:92064260-92064781	Hdac4	Tet
chr1	92064351	92064720	370	*	Intron (ENSMUST00000097644.8/208727, intron 2 of 26)	1	91928779	92195699	266921	2	208727	130979	ENSMUSG00000026313	Hdac4	histone deacetylase 4	208727	0	gene_body	chr1:92064351-92064720	Hdac4	Tet
chr1	92064288	92064690	403	*	Intron (ENSMUST00000097644.8/208727, intron 2 of 26)	1	91928779	92195699	266921	2	208727	131009	ENSMUSG00000026313	Hdac4	histone deacetylase 4	208727	0	gene_body	chr1:92064288-92064690	Hdac4	Tet
chr1	92064363	92064628	266	*	Intron (ENSMUST00000097644.8/208727, intron 2 of 26)	1	91928779	92195699	266921	2	208727	131071	ENSMUSG00000026313	Hdac4	histone deacetylase 4	208727	0	gene_body	chr1:92064363-92064628	Hdac4	Tet
chr1	92079835	92080523	689	*	Intron (ENSMUST00000097644.8/208727, intron 2 of 26)	1	91928779	92195699	266921	2	208727	115176	ENSMUSG00000026313	Hdac4	histone deacetylase 4	208727	0	gene_body	chr1:92079835-92080523	Hdac4	Tet
chr1	92080061	92080461	401	*	Intron (ENSMUST00000097644.8/208727, intron 2 of 26)	1	91928779	92195699	266921	2	208727	115238	ENSMUSG00000026313	Hdac4	histone deacetylase 4	208727	0	gene_body	chr1:92080061-92080461	Hdac4	Tet
chr1	92080280	92080483	204	*	Intron (ENSMUST00000097644.8/208727, intron 2 of 26)	1	91928779	92195699	266921	2	208727	115216	ENSMUSG00000026313	Hdac4	histone deacetylase 4	208727	0	gene_body	chr1:92080280-92080483	Hdac4	Tet
chr1	92080218	92080369	152	*	Intron (ENSMUST00000097644.8/208727, intron 2 of 26)	1	91928779	92195699	266921	2	208727	115330	ENSMUSG00000026313	Hdac4	histone deacetylase 4	208727	0	gene_body	chr1:92080218-92080369	Hdac4	Tet
chr1	92119181	92119651	471	*	Intron (ENSMUST00000097644.8/208727, intron 2 of 26)	1	91928779	92195699	266921	2	208727	76048	ENSMUSG00000026313	Hdac4	histone deacetylase 4	208727	0	gene_body	chr1:92119181-92119651	Hdac4	Tet
chr1	92119275	92119453	179	*	Intron (ENSMUST00000097644.8/208727, intron 2 of 26)	1	91928779	92195699	266921	2	208727	76246	ENSMUSG00000026313	Hdac4	histone deacetylase 4	208727	0	gene_body	chr1:92119275-92119453	Hdac4	Tet
chr1	92907235	92907634	400	*	Promoter (<=1kb)	1	92906981	92908435	1455	1	67446	254	ENSMUSG00000047067	Dusp28	dual specificity phosphatase 28	100037260;108657;14733;23830;241158;64095;67446;75995	42956;-3149;75590;-26742;-4329;-43231;0;3130	gene_body	chr1:92907235-92907634	Dusp28	Tet
chr1	92907259	92907556	298	*	Promoter (<=1kb)	1	92906981	92908435	1455	1	67446	278	ENSMUSG00000047067	Dusp28	dual specificity phosphatase 28	100037260;108657;14733;23830;241158;64095;67446;75995	43034;-3227;75614;-26820;-4353;-43309;0;3208	gene_body	chr1:92907259-92907556	Dusp28	Tet
chr1	92907286	92907571	286	*	Promoter (<=1kb)	1	92906981	92908435	1455	1	67446	305	ENSMUSG00000047067	Dusp28	dual specificity phosphatase 28	100037260;108657;14733;23830;241158;64095;67446;75995	43019;-3212;75641;-26805;-4380;-43294;0;3193	gene_body	chr1:92907286-92907571	Dusp28	Tet
chr1	92907259	92907551	293	*	Promoter (<=1kb)	1	92906981	92908435	1455	1	67446	278	ENSMUSG00000047067	Dusp28	dual specificity phosphatase 28	100037260;108657;14733;23830;241158;64095;67446;75995	43039;-3232;75614;-26825;-4353;-43314;0;3213	gene_body	chr1:92907259-92907551	Dusp28	Tet
chr1	93115130	93115379	250	*	Distal Intergenic	1	93015464	93101951	86488	2	16560	-13179	ENSMUSG00000014602	Kif1a	kinesin family member 1A	11611;16560;71874	-19861;-13179;45569	Distal Intergenic	chr1:93115130-93115379	Kif1a	Tet
chr1	93115124	93115362	239	*	Distal Intergenic	1	93015464	93101951	86488	2	16560	-13173	ENSMUSG00000014602	Kif1a	kinesin family member 1A	11611;16560;71874	-19878;-13173;45586	Distal Intergenic	chr1:93115124-93115362	Kif1a	Tet
chr1	93115159	93115327	169	*	Distal Intergenic	1	93015464	93101951	86488	2	16560	-13208	ENSMUSG00000014602	Kif1a	kinesin family member 1A	11611;16560;71874	-19913;-13208;45621	Distal Intergenic	chr1:93115159-93115327	Kif1a	Tet
chr1	93444978	93445173	196	*	Intron (ENSMUST00000170883.7/110611, intron 1 of 27)	1	93405940	93478815	72876	2	110611	33642	ENSMUSG00000034088	Hdlbp	high density lipoprotein (HDL) binding protein	110611;18000;404545	0;-33791;71048	gene_body	chr1:93444978-93445173	Hdlbp	Tet
chr1	93668802	93669122	321	*	Distal Intergenic	1	93619751	93658659	38909	2	59041	-10143	ENSMUSG00000026277	Stk25	serine/threonine kinase 25 (yeast)	227377;51800;59041;67026	156723;-16538;-10143;85742	Distal Intergenic	chr1:93668802-93669122	Stk25	Tet
chr1	93668901	93669055	155	*	Distal Intergenic	1	93619751	93658659	38909	2	59041	-10242	ENSMUSG00000026277	Stk25	serine/threonine kinase 25 (yeast)	227377;51800;59041;67026	156822;-16605;-10242;85809	Distal Intergenic	chr1:93668901-93669055	Stk25	Tet
chr1	94034959	94035745	787	*	Distal Intergenic	1	94020451	94028334	7884	1	241159	14508	ENSMUSG00000034000	Neu4	sialidase 4	18566;241159;619597	0;14508;44450	Distal Intergenic	chr1:94034959-94035745	Neu4	Tet
chr1	94035024	94035708	685	*	Distal Intergenic	1	94020451	94028334	7884	1	241159	14573	ENSMUSG00000034000	Neu4	sialidase 4	18566;241159;619597	0;14573;44515	Distal Intergenic	chr1:94035024-94035708	Neu4	Tet
chr1	94034982	94035685	704	*	Distal Intergenic	1	94020451	94028334	7884	1	241159	14531	ENSMUSG00000034000	Neu4	sialidase 4	18566;241159;619597	0;14531;44473	Distal Intergenic	chr1:94034982-94035685	Neu4	Tet
chr1	94035099	94035674	576	*	Distal Intergenic	1	94020451	94028334	7884	1	241159	14648	ENSMUSG00000034000	Neu4	sialidase 4	18566;241159;619597	0;14648;44590	Distal Intergenic	chr1:94035099-94035674	Neu4	Tet
chr1	94042293	94042676	384	*	Intron (ENSMUST00000027507.7/18566, intron 1 of 4)	1	94038305	94052553	14249	2	18566	9877	ENSMUSG00000026285	Pdcd1	programmed cell death 1	18566;241159;619597	0;21842;51784	gene_body	chr1:94042293-94042676	Pdcd1	Tet
chr1	94046554	94046870	317	*	Intron (ENSMUST00000027507.7/18566, intron 1 of 4)	1	94038305	94052553	14249	2	18566	5683	ENSMUSG00000026285	Pdcd1	programmed cell death 1	18566;241159;619597	0;26103;56045	gene_body	chr1:94046554-94046870	Pdcd1	Tet
chr1	94046522	94046721	200	*	Intron (ENSMUST00000027507.7/18566, intron 1 of 4)	1	94038305	94052553	14249	2	18566	5832	ENSMUSG00000026285	Pdcd1	programmed cell death 1	18566;241159;619597	0;26071;56013	gene_body	chr1:94046522-94046721	Pdcd1	Tet
chr1	94056051	94056229	179	*	Distal Intergenic	1	94038305	94052553	14249	2	18566	-3498	ENSMUSG00000026285	Pdcd1	programmed cell death 1	18566;241159;619597	0;35600;65542	Distal Intergenic	chr1:94056051-94056229	Pdcd1	Tet
chr1	94091815	94092085	271	*	Distal Intergenic	1	94038305	94052553	14249	2	18566	-39262	ENSMUSG00000026285	Pdcd1	programmed cell death 1	18566	0	Distal Intergenic	chr1:94091815-94092085	Pdcd1	Tet
chr1	94091822	94092121	300	*	Distal Intergenic	1	94038305	94052553	14249	2	18566	-39269	ENSMUSG00000026285	Pdcd1	programmed cell death 1	18566	0	Distal Intergenic	chr1:94091822-94092121	Pdcd1	Tet
chr1	94091787	94092089	303	*	Distal Intergenic	1	94038305	94052553	14249	2	18566	-39234	ENSMUSG00000026285	Pdcd1	programmed cell death 1	18566	0	Distal Intergenic	chr1:94091787-94092089	Pdcd1	Tet
chr1	95267957	95268473	517	*	Distal Intergenic	1	95313623	95335284	21662	1	67698	-45150	ENSMUSG00000051185	Fam174a	family with sequence similarity 174, member A	67698	0	Distal Intergenic	chr1:95267957-95268473	Fam174a	Tet
chr1	95267990	95268528	539	*	Distal Intergenic	1	95313623	95335284	21662	1	67698	-45095	ENSMUSG00000051185	Fam174a	family with sequence similarity 174, member A	67698	0	Distal Intergenic	chr1:95267990-95268528	Fam174a	Tet
chr1	95313920	95314253	334	*	Promoter (<=1kb)	1	95313623	95335284	21662	1	67698	297	ENSMUSG00000051185	Fam174a	family with sequence similarity 174, member A	67698	0	gene_body	chr1:95313920-95314253	Fam174a	Tet
chr1	95314026	95314219	194	*	Promoter (<=1kb)	1	95313623	95335284	21662	1	67698	403	ENSMUSG00000051185	Fam174a	family with sequence similarity 174, member A	67698	0	gene_body	chr1:95314026-95314219	Fam174a	Tet
chr1	95655584	95656021	438	*	Intron (ENSMUST00000043336.10/20452, intron 2 of 4)	1	95587682	95667571	79890	2	20452	11550	ENSMUSG00000040710	St8sia4	ST8 alpha-N-acetyl-neuraminide alpha-2,8-sialyltransferase 4	20452;75381	0;60497	gene_body	chr1:95655584-95656021	St8sia4	Tet
chr1	95655629	95655901	273	*	Intron (ENSMUST00000043336.10/20452, intron 2 of 4)	1	95587682	95667571	79890	2	20452	11670	ENSMUSG00000040710	St8sia4	ST8 alpha-N-acetyl-neuraminide alpha-2,8-sialyltransferase 4	20452;75381	0;60617	gene_body	chr1:95655629-95655901	St8sia4	Tet
chr1	95655713	95655862	150	*	Intron (ENSMUST00000043336.10/20452, intron 2 of 4)	1	95587682	95667571	79890	2	20452	11709	ENSMUSG00000040710	St8sia4	ST8 alpha-N-acetyl-neuraminide alpha-2,8-sialyltransferase 4	20452;75381	0;60656	gene_body	chr1:95655713-95655862	St8sia4	Tet
chr1	97580362	97580607	246	*	Distal Intergenic	1	97606318	97662074	55757	2	52392	81467	ENSMUSG00000044768	Macir	macrophage immunometabolism regulator	52392	0	Distal Intergenic	chr1:97580362-97580607	Macir	Tet
chr1	97580377	97580801	425	*	Distal Intergenic	1	97606318	97662074	55757	2	52392	81273	ENSMUSG00000044768	Macir	macrophage immunometabolism regulator	52392	0	Distal Intergenic	chr1:97580377-97580801	Macir	Tet
chr1	97580370	97580573	204	*	Distal Intergenic	1	97606318	97662074	55757	2	52392	81501	ENSMUSG00000044768	Macir	macrophage immunometabolism regulator	52392	0	Distal Intergenic	chr1:97580370-97580573	Macir	Tet
chr1	97661151	97661450	300	*	Promoter (<=1kb)	1	97606318	97662074	55757	2	52392	624	ENSMUSG00000044768	Macir	macrophage immunometabolism regulator	227399;52392	108961;0	gene_body	chr1:97661151-97661450	Macir	Tet
chr1	97661059	97661328	270	*	Promoter (<=1kb)	1	97606318	97662074	55757	2	52392	746	ENSMUSG00000044768	Macir	macrophage immunometabolism regulator	227399;52392	109083;0	gene_body	chr1:97661059-97661328	Macir	Tet
chr1	97661107	97661312	206	*	Promoter (<=1kb)	1	97606318	97662074	55757	2	52392	762	ENSMUSG00000044768	Macir	macrophage immunometabolism regulator	227399;52392	109099;0	gene_body	chr1:97661107-97661312	Macir	Tet
chr1	101902792	101903036	245	*	Distal Intergenic	1	101155809	101175202	19394	1	100504525	746983	ENSMUSG00000100684	Gm20268	predicted gene, 20268			Distal Intergenic	chr1:101902792-101903036	Gm20268	Tet
chr1	101902207	101902361	155	*	Distal Intergenic	1	101155809	101175202	19394	1	100504525	746398	ENSMUSG00000100684	Gm20268	predicted gene, 20268			Distal Intergenic	chr1:101902207-101902361	Gm20268	Tet
chr1	101902794	101903056	263	*	Distal Intergenic	1	101155809	101175202	19394	1	100504525	746985	ENSMUSG00000100684	Gm20268	predicted gene, 20268			Distal Intergenic	chr1:101902794-101903056	Gm20268	Tet
chr1	105971628	105972018	391	*	Distal Intergenic	1	105979350	105990282	10933	2	635504	18264	ENSMUSG00000099843	Gm7160	predicted gene 7160	227449;635504	0;18264	Distal Intergenic	chr1:105971628-105972018	Gm7160	Tet
chr1	105993913	105994134	222	*	Intron (ENSMUST00000118196.7/227449, intron 1 of 13)	1	105990406	106034074	43669	1	227449	3507	ENSMUSG00000038866	Zcchc2	zinc finger, CCHC domain containing 2	227449;635504	0;-3631	gene_body	chr1:105993913-105994134	Zcchc2	Tet
chr1	105993873	105994134	262	*	Intron (ENSMUST00000118196.7/227449, intron 1 of 13)	1	105990406	106034074	43669	1	227449	3467	ENSMUSG00000038866	Zcchc2	zinc finger, CCHC domain containing 2	227449;635504	0;-3591	gene_body	chr1:105993873-105994134	Zcchc2	Tet
chr1	106151910	106152059	150	*	Distal Intergenic	1	106152625	106171524	18900	2	626049	19465	ENSMUSG00000101583	Gm20753	predicted gene, 20753	626049;98432	19465;-19693	Distal Intergenic	chr1:106151910-106152059	Gm20753	Tet
chr1	106151892	106152093	202	*	Distal Intergenic	1	106152625	106171524	18900	2	626049	19431	ENSMUSG00000101583	Gm20753	predicted gene, 20753	626049;98432	19431;-19659	Distal Intergenic	chr1:106151892-106152093	Gm20753	Tet
chr1	106515663	106515835	173	*	Distal Intergenic	1	106546496	106546631	136	2	102466254	30796	ENSMUSG00000098344	Mir3473f	microRNA 3473f	102466254;12043	30796;0	Distal Intergenic	chr1:106515663-106515835	Mir3473f	Tet
chr1	106515704	106515873	170	*	Distal Intergenic	1	106546496	106546631	136	2	102466254	30758	ENSMUSG00000098344	Mir3473f	microRNA 3473f	102466254;12043	30758;0	Distal Intergenic	chr1:106515704-106515873	Mir3473f	Tet
chr1	106561097	106561455	359	*	Intron (ENSMUST00000149909.1/ENSMUST00000149909.1, intron 2 of 4)	1	106546496	106546631	136	2	102466254	-14466	ENSMUSG00000098344	Mir3473f	microRNA 3473f	102466254;12043	-14466;0	gene_body	chr1:106561097-106561455	Mir3473f	Tet
chr1	106567578	106567791	214	*	Exon (ENSMUST00000149909.1/ENSMUST00000149909.1, exon 3 of 5)	1	106546496	106546631	136	2	102466254	-20947	ENSMUSG00000098344	Mir3473f	microRNA 3473f	102466254;12043	-20947;0	gene_body	chr1:106567578-106567791	Mir3473f	Tet
chr1	106569658	106569914	257	*	Intron (ENSMUST00000149909.1/ENSMUST00000149909.1, intron 3 of 4)	1	106546496	106546631	136	2	102466254	-23027	ENSMUSG00000098344	Mir3473f	microRNA 3473f	102466254;12043	-23027;0	gene_body	chr1:106569658-106569914	Mir3473f	Tet
chr1	106612553	106612971	419	*	Intron (ENSMUST00000112751.1/12043, intron 1 of 1)	1	106546496	106546631	136	2	102466254	-65922	ENSMUSG00000098344	Mir3473f	microRNA 3473f	12043	0	gene_body	chr1:106612553-106612971	Mir3473f	Tet
chr1	106647373	106647713	341	*	Intron (ENSMUST00000112751.1/12043, intron 1 of 1)	1	106538178	106714274	176097	2	12043	66561	ENSMUSG00000057329	Bcl2	B cell leukemia/lymphoma 2	12043	0	gene_body	chr1:106647373-106647713	Bcl2	Tet
chr1	106687803	106687952	150	*	Intron (ENSMUST00000112751.1/12043, intron 1 of 1)	1	106538178	106714274	176097	2	12043	26322	ENSMUSG00000057329	Bcl2	B cell leukemia/lymphoma 2	12043;70750	0;0	gene_body	chr1:106687803-106687952	Bcl2	Tet
chr1	106712396	106712605	210	*	Promoter (1-2kb)	1	106538178	106714274	176097	2	12043	1669	ENSMUSG00000057329	Bcl2	B cell leukemia/lymphoma 2	12043;70750	0;0	gene_body	chr1:106712396-106712605	Bcl2	Tet
chr1	106712403	106712570	168	*	Promoter (1-2kb)	1	106538178	106714274	176097	2	12043	1704	ENSMUSG00000057329	Bcl2	B cell leukemia/lymphoma 2	12043;70750	0;0	gene_body	chr1:106712403-106712570	Bcl2	Tet
chr1	106712425	106712631	207	*	Promoter (1-2kb)	1	106538178	106714274	176097	2	12043	1643	ENSMUSG00000057329	Bcl2	B cell leukemia/lymphoma 2	12043;70750	0;0	gene_body	chr1:106712425-106712631	Bcl2	Tet
chr1	106759214	106759365	152	*	Promoter (<=1kb)	1	106720459	106759727	39269	2	70750	362	ENSMUSG00000009905	Kdsr	3-ketodihydrosphingosine reductase	12043;20479;70750	0;37363;0	gene_body	chr1:106759214-106759365	Kdsr	Tet
chr1	111864074	111864266	193	*	Promoter (<=1kb)	1	111858702	111864918	6217	2	319901	652	ENSMUSG00000038702	Dsel	dermatan sulfate epimerase-like	319901	0	gene_body	chr1:111864074-111864266	Dsel	Tet
chr1	119477080	119477229	150	*	Intron (ENSMUST00000004565.14/64143, intron 3 of 4)	1	119470305	119504794	34490	2	64143	27565	ENSMUSG00000004451	Ralb	v-ral simian leukemia viral oncogene B	226351;64143	-48931;0	gene_body	chr1:119477080-119477229	Ralb	Tet
chr1	120055570	120055857	288	*	Intron (ENSMUST00000072886.10/319229, intron 11 of 13)	1	120067377	120074074	6698	2	170706	18217	ENSMUSG00000050777	Tmem37	transmembrane protein 37	170706;319229	18217;0	gene_body	chr1:120055570-120055857	Tmem37	Tet
chr1	120055553	120055793	241	*	Intron (ENSMUST00000072886.10/319229, intron 11 of 13)	1	120067377	120074074	6698	2	170706	18281	ENSMUSG00000050777	Tmem37	transmembrane protein 37	170706;319229	18281;0	gene_body	chr1:120055553-120055793	Tmem37	Tet
chr1	120055549	120055758	210	*	Intron (ENSMUST00000072886.10/319229, intron 11 of 13)	1	120067377	120074074	6698	2	170706	18316	ENSMUSG00000050777	Tmem37	transmembrane protein 37	170706;319229	18316;0	gene_body	chr1:120055549-120055758	Tmem37	Tet
chr1	121431646	121431922	277	*	Promoter (<=1kb)	1	121431049	121506460	75412	1	70829	597	ENSMUSG00000026339	Ccdc93	coiled-coil domain containing 93	70829	0	gene_body	chr1:121431646-121431922	Ccdc93	Tet
chr1	125389823	125390549	727	*	Distal Intergenic	1	125392905	125435727	42823	2	74117	45178	ENSMUSG00000026341	Actr3	ARP3 actin-related protein 3	74117	0	Distal Intergenic	chr1:125389823-125390549	Actr3	Tet
chr1	125389818	125390098	281	*	Distal Intergenic	1	125392905	125435727	42823	2	74117	45629	ENSMUSG00000026341	Actr3	ARP3 actin-related protein 3	74117	0	Distal Intergenic	chr1:125389818-125390098	Actr3	Tet
chr1	125430783	125431027	245	*	Intron (ENSMUST00000027579.16/74117, intron 2 of 12)	1	125392905	125435727	42823	2	74117	4700	ENSMUSG00000026341	Actr3	ARP3 actin-related protein 3	74117	0	gene_body	chr1:125430783-125431027	Actr3	Tet
chr1	125466719	125467203	485	*	Distal Intergenic	1	125392905	125435727	42823	2	74117	-30992	ENSMUSG00000026341	Actr3	ARP3 actin-related protein 3	74117	0	Distal Intergenic	chr1:125466719-125467203	Actr3	Tet
chr1	125467907	125468375	469	*	Distal Intergenic	1	125392905	125435727	42823	2	74117	-32180	ENSMUSG00000026341	Actr3	ARP3 actin-related protein 3	74117	0	Distal Intergenic	chr1:125467907-125468375	Actr3	Tet
chr1	125467935	125468230	296	*	Distal Intergenic	1	125392905	125435727	42823	2	74117	-32208	ENSMUSG00000026341	Actr3	ARP3 actin-related protein 3	74117	0	Distal Intergenic	chr1:125467935-125468230	Actr3	Tet
chr1	125467965	125468164	200	*	Distal Intergenic	1	125392905	125435727	42823	2	74117	-32238	ENSMUSG00000026341	Actr3	ARP3 actin-related protein 3	74117	0	Distal Intergenic	chr1:125467965-125468164	Actr3	Tet
chr1	126940322	126940486	165	*	Distal Intergenic	1	125913620	126830799	917180	2	210356	-109523	ENSMUSG00000049690	Nckap5	NCK-associated protein 5			Distal Intergenic	chr1:126940322-126940486	Nckap5	Tet
chr1	127205894	127206265	372	*	Promoter (<=1kb)	1	127205015	127488336	283322	1	107895	879	ENSMUSG00000036155	Mgat5	mannoside acetylglucosaminyltransferase 5	107895	0	gene_body	chr1:127205894-127206265	Mgat5	Tet
chr1	127230624	127230814	191	*	Intron (ENSMUST00000189427.6/107895, intron 1 of 7)	1	127205015	127488336	283322	1	107895	25609	ENSMUSG00000036155	Mgat5	mannoside acetylglucosaminyltransferase 5	107895	0	gene_body	chr1:127230624-127230814	Mgat5	Tet
chr1	127233128	127233656	529	*	Intron (ENSMUST00000189427.6/107895, intron 1 of 7)	1	127205015	127488336	283322	1	107895	28113	ENSMUSG00000036155	Mgat5	mannoside acetylglucosaminyltransferase 5	107895	0	gene_body	chr1:127233128-127233656	Mgat5	Tet
chr1	127233160	127233604	445	*	Intron (ENSMUST00000189427.6/107895, intron 1 of 7)	1	127205015	127488336	283322	1	107895	28145	ENSMUSG00000036155	Mgat5	mannoside acetylglucosaminyltransferase 5	107895	0	gene_body	chr1:127233160-127233604	Mgat5	Tet
chr1	127233255	127233404	150	*	Intron (ENSMUST00000189427.6/107895, intron 1 of 7)	1	127205015	127488336	283322	1	107895	28240	ENSMUSG00000036155	Mgat5	mannoside acetylglucosaminyltransferase 5	107895	0	gene_body	chr1:127233255-127233404	Mgat5	Tet
chr1	127233253	127233498	246	*	Intron (ENSMUST00000189427.6/107895, intron 1 of 7)	1	127205015	127488336	283322	1	107895	28238	ENSMUSG00000036155	Mgat5	mannoside acetylglucosaminyltransferase 5	107895	0	gene_body	chr1:127233253-127233498	Mgat5	Tet
chr1	127296852	127297162	311	*	Intron (ENSMUST00000189427.6/107895, intron 1 of 7)	1	127205015	127488336	283322	1	107895	91837	ENSMUSG00000036155	Mgat5	mannoside acetylglucosaminyltransferase 5	107895	0	gene_body	chr1:127296852-127297162	Mgat5	Tet
chr1	127344944	127345426	483	*	Intron (ENSMUST00000189427.6/107895, intron 3 of 7)	1	127205015	127488336	283322	1	107895	139929	ENSMUSG00000036155	Mgat5	mannoside acetylglucosaminyltransferase 5	107895	0	gene_body	chr1:127344944-127345426	Mgat5	Tet
chr1	128357489	128357709	221	*	Promoter (1-2kb)	1	128331590	128359664	28075	2	17219	1955	ENSMUSG00000026355	Mcm6	minichromosome maintenance complex component 6	17219;226413;226414	0;-29171;0	gene_body	chr1:128357489-128357709	Mcm6	Tet
chr1	128399149	128399545	397	*	Intron (ENSMUST00000027602.14/226414, intron 4 of 15)	1	128363707	128417368	53662	2	226414	17823	ENSMUSG00000026356	Dars	aspartyl-tRNA synthetase	17219;226414	0;0	gene_body	chr1:128399149-128399545	Dars	Tet
chr1	128447243	128447493	251	*	Distal Intergenic	1	128363707	128417368	53662	2	226414	-29875	ENSMUSG00000026356	Dars	aspartyl-tRNA synthetase	226414	0	Distal Intergenic	chr1:128447243-128447493	Dars	Tet
chr1	128548729	128549137	409	*	Distal Intergenic	1	128588199	128592293	4095	2	12767	43156	ENSMUSG00000045382	Cxcr4	chemokine (C-X-C motif) receptor 4	12767	0	Distal Intergenic	chr1:128548729-128549137	Cxcr4	Tet
chr1	128590768	128591030	263	*	Promoter (1-2kb)	1	128588199	128592293	4095	2	12767	1263	ENSMUSG00000045382	Cxcr4	chemokine (C-X-C motif) receptor 4	12767	0	gene_body	chr1:128590768-128591030	Cxcr4	Tet
chr1	128591107	128591525	419	*	Promoter (<=1kb)	1	128588199	128592293	4095	2	12767	768	ENSMUSG00000045382	Cxcr4	chemokine (C-X-C motif) receptor 4	12767	0	gene_body	chr1:128591107-128591525	Cxcr4	Tet
chr1	128591120	128591408	289	*	Promoter (<=1kb)	1	128588199	128592293	4095	2	12767	885	ENSMUSG00000045382	Cxcr4	chemokine (C-X-C motif) receptor 4	12767	0	gene_body	chr1:128591120-128591408	Cxcr4	Tet
chr1	128591346	128591525	180	*	Promoter (<=1kb)	1	128588199	128592293	4095	2	12767	768	ENSMUSG00000045382	Cxcr4	chemokine (C-X-C motif) receptor 4	12767	0	gene_body	chr1:128591346-128591525	Cxcr4	Tet
chr1	128591053	128591240	188	*	Promoter (1-2kb)	1	128588199	128592293	4095	2	12767	1053	ENSMUSG00000045382	Cxcr4	chemokine (C-X-C motif) receptor 4	12767	0	gene_body	chr1:128591053-128591240	Cxcr4	Tet
chr1	128605879	128606144	266	*	Distal Intergenic	1	128588199	128592293	4095	2	12767	-13586	ENSMUSG00000045382	Cxcr4	chemokine (C-X-C motif) receptor 4	12767	0	Distal Intergenic	chr1:128605879-128606144	Cxcr4	Tet
chr1	128605856	128606063	208	*	Distal Intergenic	1	128588199	128592293	4095	2	12767	-13563	ENSMUSG00000045382	Cxcr4	chemokine (C-X-C motif) receptor 4	12767	0	Distal Intergenic	chr1:128605856-128606063	Cxcr4	Tet
chr1	128611865	128612149	285	*	Distal Intergenic	1	128588199	128592293	4095	2	12767	-19572	ENSMUSG00000045382	Cxcr4	chemokine (C-X-C motif) receptor 4	12767	0	Distal Intergenic	chr1:128611865-128612149	Cxcr4	Tet
chr1	128614821	128615384	564	*	Distal Intergenic	1	128588199	128592293	4095	2	12767	-22528	ENSMUSG00000045382	Cxcr4	chemokine (C-X-C motif) receptor 4	12767	0	Distal Intergenic	chr1:128614821-128615384	Cxcr4	Tet
chr1	128615472	128615718	247	*	Distal Intergenic	1	128588199	128592293	4095	2	12767	-23179	ENSMUSG00000045382	Cxcr4	chemokine (C-X-C motif) receptor 4	12767	0	Distal Intergenic	chr1:128615472-128615718	Cxcr4	Tet
chr1	128614616	128615282	667	*	Distal Intergenic	1	128588199	128592293	4095	2	12767	-22323	ENSMUSG00000045382	Cxcr4	chemokine (C-X-C motif) receptor 4	12767	0	Distal Intergenic	chr1:128614616-128615282	Cxcr4	Tet
chr1	128614841	128615249	409	*	Distal Intergenic	1	128588199	128592293	4095	2	12767	-22548	ENSMUSG00000045382	Cxcr4	chemokine (C-X-C motif) receptor 4	12767	0	Distal Intergenic	chr1:128614841-128615249	Cxcr4	Tet
chr1	128614801	128615202	402	*	Distal Intergenic	1	128588199	128592293	4095	2	12767	-22508	ENSMUSG00000045382	Cxcr4	chemokine (C-X-C motif) receptor 4	12767	0	Distal Intergenic	chr1:128614801-128615202	Cxcr4	Tet
chr1	128705012	128705560	549	*	Distal Intergenic	1	128588199	128592293	4095	2	12767	-112719	ENSMUSG00000045382	Cxcr4	chemokine (C-X-C motif) receptor 4			Distal Intergenic	chr1:128705012-128705560	Cxcr4	Tet
chr1	128705227	128705467	241	*	Distal Intergenic	1	128588199	128592293	4095	2	12767	-112934	ENSMUSG00000045382	Cxcr4	chemokine (C-X-C motif) receptor 4			Distal Intergenic	chr1:128705227-128705467	Cxcr4	Tet
chr1	128766738	128767364	627	*	Distal Intergenic	1	128588199	128592293	4095	2	12767	-174445	ENSMUSG00000045382	Cxcr4	chemokine (C-X-C motif) receptor 4			Distal Intergenic	chr1:128766738-128767364	Cxcr4	Tet
chr1	128766785	128767364	580	*	Distal Intergenic	1	128588199	128592293	4095	2	12767	-174492	ENSMUSG00000045382	Cxcr4	chemokine (C-X-C motif) receptor 4			Distal Intergenic	chr1:128766785-128767364	Cxcr4	Tet
chr1	128766974	128767232	259	*	Distal Intergenic	1	128588199	128592293	4095	2	12767	-174681	ENSMUSG00000045382	Cxcr4	chemokine (C-X-C motif) receptor 4			Distal Intergenic	chr1:128766974-128767232	Cxcr4	Tet
chr1	128767005	128767239	235	*	Distal Intergenic	1	128588199	128592293	4095	2	12767	-174712	ENSMUSG00000045382	Cxcr4	chemokine (C-X-C motif) receptor 4			Distal Intergenic	chr1:128767005-128767239	Cxcr4	Tet
chr1	128770849	128771169	321	*	Exon (ENSMUST00000181951.1/ENSMUST00000181951.1, exon 2 of 2)	1	128588199	128592293	4095	2	12767	-178556	ENSMUSG00000045382	Cxcr4	chemokine (C-X-C motif) receptor 4			gene_body	chr1:128770849-128771169	Cxcr4	Tet
chr1	128786896	128787613	718	*	Distal Intergenic	1	128588199	128592293	4095	2	12767	-194603	ENSMUSG00000045382	Cxcr4	chemokine (C-X-C motif) receptor 4			Distal Intergenic	chr1:128786896-128787613	Cxcr4	Tet
chr1	128787298	128787523	226	*	Distal Intergenic	1	128588199	128592293	4095	2	12767	-195005	ENSMUSG00000045382	Cxcr4	chemokine (C-X-C motif) receptor 4			Distal Intergenic	chr1:128787298-128787523	Cxcr4	Tet
chr1	128787267	128787531	265	*	Distal Intergenic	1	128588199	128592293	4095	2	12767	-194974	ENSMUSG00000045382	Cxcr4	chemokine (C-X-C motif) receptor 4			Distal Intergenic	chr1:128787267-128787531	Cxcr4	Tet
chr1	128808560	128808898	339	*	Distal Intergenic	1	128588199	128592293	4095	2	12767	-216267	ENSMUSG00000045382	Cxcr4	chemokine (C-X-C motif) receptor 4			Distal Intergenic	chr1:128808560-128808898	Cxcr4	Tet
chr1	128832265	128832873	609	*	Distal Intergenic	1	128588199	128592293	4095	2	12767	-239972	ENSMUSG00000045382	Cxcr4	chemokine (C-X-C motif) receptor 4			Distal Intergenic	chr1:128832265-128832873	Cxcr4	Tet
chr1	130475071	130475286	216	*	Exon (ENSMUST00000193111.1/ENSMUST00000193111.1, exon 1 of 1)	1	130439027	130462744	23718	2	13136	-12327	ENSMUSG00000026399	Cd55	CD55 molecule, decay accelerating factor for complement	102640368;13136	52247;-12327	gene_body	chr1:130475071-130475286	Cd55	Tet
chr1	130992158	130992341	184	*	Distal Intergenic	1	131019845	131024974	5130	1	16153	-27504	ENSMUSG00000016529	Il10	interleukin 10	16153	0	Distal Intergenic	chr1:130992158-130992341	Il10	Tet
chr1	130993619	130994158	540	*	Distal Intergenic	1	131019845	131024974	5130	1	16153	-25687	ENSMUSG00000016529	Il10	interleukin 10	16153	0	Distal Intergenic	chr1:130993619-130994158	Il10	Tet
chr1	130996222	130996730	509	*	Distal Intergenic	1	131019845	131024974	5130	1	16153	-23115	ENSMUSG00000016529	Il10	interleukin 10	16153	0	Distal Intergenic	chr1:130996222-130996730	Il10	Tet
chr1	130993635	130994109	475	*	Distal Intergenic	1	131019845	131024974	5130	1	16153	-25736	ENSMUSG00000016529	Il10	interleukin 10	16153	0	Distal Intergenic	chr1:130993635-130994109	Il10	Tet
chr1	130993763	130994161	399	*	Distal Intergenic	1	131019845	131024974	5130	1	16153	-25684	ENSMUSG00000016529	Il10	interleukin 10	16153	0	Distal Intergenic	chr1:130993763-130994161	Il10	Tet
chr1	130993699	130994059	361	*	Distal Intergenic	1	131019845	131024974	5130	1	16153	-25786	ENSMUSG00000016529	Il10	interleukin 10	16153	0	Distal Intergenic	chr1:130993699-130994059	Il10	Tet
chr1	130999745	130999903	159	*	Distal Intergenic	1	131019845	131024974	5130	1	16153	-19942	ENSMUSG00000016529	Il10	interleukin 10	16153	0	Distal Intergenic	chr1:130999745-130999903	Il10	Tet
chr1	131000544	131000697	154	*	Distal Intergenic	1	131019845	131024974	5130	1	16153	-19148	ENSMUSG00000016529	Il10	interleukin 10	16153	0	Distal Intergenic	chr1:131000544-131000697	Il10	Tet
chr1	131003078	131003734	657	*	Distal Intergenic	1	131019845	131024974	5130	1	16153	-16111	ENSMUSG00000016529	Il10	interleukin 10	16153;17164	0;0	Distal Intergenic	chr1:131003078-131003734	Il10	Tet
chr1	131003197	131003686	490	*	Distal Intergenic	1	131019845	131024974	5130	1	16153	-16159	ENSMUSG00000016529	Il10	interleukin 10	16153	0	Distal Intergenic	chr1:131003197-131003686	Il10	Tet
chr1	131003119	131003681	563	*	Distal Intergenic	1	131019845	131024974	5130	1	16153	-16164	ENSMUSG00000016529	Il10	interleukin 10	16153	0	Distal Intergenic	chr1:131003119-131003681	Il10	Tet
chr1	131003429	131003637	209	*	Distal Intergenic	1	131019845	131024974	5130	1	16153	-16208	ENSMUSG00000016529	Il10	interleukin 10	16153	0	Distal Intergenic	chr1:131003429-131003637	Il10	Tet
chr1	131010516	131010914	399	*	Distal Intergenic	1	131019845	131024974	5130	1	16153	-8931	ENSMUSG00000016529	Il10	interleukin 10	16153;17164	0;0	Distal Intergenic	chr1:131010516-131010914	Il10	Tet
chr1	131010561	131010817	257	*	Distal Intergenic	1	131019845	131024974	5130	1	16153	-9028	ENSMUSG00000016529	Il10	interleukin 10	16153;17164	0;0	Distal Intergenic	chr1:131010561-131010817	Il10	Tet
chr1	131010595	131010828	234	*	Distal Intergenic	1	131019845	131024974	5130	1	16153	-9017	ENSMUSG00000016529	Il10	interleukin 10	16153;17164	0;0	Distal Intergenic	chr1:131010595-131010828	Il10	Tet
chr1	131021463	131021779	317	*	Promoter (1-2kb)	1	131019845	131024974	5130	1	16153	1618	ENSMUSG00000016529	Il10	interleukin 10	16153;17164	0;0	gene_body	chr1:131021463-131021779	Il10	Tet
chr1	131022594	131023008	415	*	Intron (ENSMUST00000016673.5/16153, intron 4 of 4)	1	131019845	131024974	5130	1	16153	2749	ENSMUSG00000016529	Il10	interleukin 10	16153;17164	0;0	gene_body	chr1:131022594-131023008	Il10	Tet
chr1	131021582	131021769	188	*	Promoter (1-2kb)	1	131019845	131024974	5130	1	16153	1737	ENSMUSG00000016529	Il10	interleukin 10	16153;17164	0;0	gene_body	chr1:131021582-131021769	Il10	Tet
chr1	131021514	131021745	232	*	Promoter (1-2kb)	1	131019845	131024974	5130	1	16153	1669	ENSMUSG00000016529	Il10	interleukin 10	16153;17164	0;0	gene_body	chr1:131021514-131021745	Il10	Tet
chr1	131021597	131021746	150	*	Promoter (1-2kb)	1	131019845	131024974	5130	1	16153	1752	ENSMUSG00000016529	Il10	interleukin 10	16153;17164	0;0	gene_body	chr1:131021597-131021746	Il10	Tet
chr1	131025732	131025931	200	*	Downstream (<1kb)	1	131019845	131024974	5130	1	16153	5887	ENSMUSG00000016529	Il10	interleukin 10	16153;17164	0;0	gene_body	chr1:131025732-131025931	Il10	Tet
chr1	131038080	131039096	1017	*	Distal Intergenic	1	131019845	131024974	5130	1	16153	18235	ENSMUSG00000016529	Il10	interleukin 10	16153;17164	0;0	Distal Intergenic	chr1:131038080-131039096	Il10	Tet
chr1	131038180	131038392	213	*	Distal Intergenic	1	131019845	131024974	5130	1	16153	18335	ENSMUSG00000016529	Il10	interleukin 10	16153;17164	0;0	Distal Intergenic	chr1:131038180-131038392	Il10	Tet
chr1	131053273	131053500	228	*	Distal Intergenic	1	131019845	131024974	5130	1	16153	33428	ENSMUSG00000016529	Il10	interleukin 10	16153;17164	0;0	Distal Intergenic	chr1:131053273-131053500	Il10	Tet
chr1	131080744	131081062	319	*	Intron (ENSMUST00000016672.10/17164, intron 1 of 9)	1	131053700	131097826	44127	2	17164	16764	ENSMUSG00000016528	Mapkapk2	MAP kinase-activated protein kinase 2	17164;226419	0;57278	gene_body	chr1:131080744-131081062	Mapkapk2	Tet
chr1	131096860	131097127	268	*	Promoter (<=1kb)	1	131053700	131097826	44127	2	17164	699	ENSMUSG00000016528	Mapkapk2	MAP kinase-activated protein kinase 2	17164;226419	0;41213	gene_body	chr1:131096860-131097127	Mapkapk2	Tet
chr1	131096848	131097057	210	*	Promoter (<=1kb)	1	131053700	131097826	44127	2	17164	769	ENSMUSG00000016528	Mapkapk2	MAP kinase-activated protein kinase 2	17164;226419	0;41283	gene_body	chr1:131096848-131097057	Mapkapk2	Tet
chr1	131110584	131110771	188	*	Distal Intergenic	1	131053700	131097826	44127	2	17164	-12758	ENSMUSG00000016528	Mapkapk2	MAP kinase-activated protein kinase 2	16865;17164;226419	0;0;27569	Distal Intergenic	chr1:131110584-131110771	Mapkapk2	Tet
chr1	131110856	131111027	172	*	Distal Intergenic	1	131053700	131097826	44127	2	17164	-13030	ENSMUSG00000016528	Mapkapk2	MAP kinase-activated protein kinase 2	16865;17164;226419	0;0;27313	Distal Intergenic	chr1:131110856-131111027	Mapkapk2	Tet
chr1	131181745	131181911	167	*	Intron (ENSMUST00000131855.1/16865, intron 14 of 15)	1	131153181	131187658	34478	1	16865	28564	ENSMUSG00000026427	Eif2d	eukaryotic translation initiation factor 2D	16865;226419;54354	0;-43405;0	gene_body	chr1:131181745-131181911	Eif2d	Tet
chr1	131186202	131186417	216	*	3' UTR	1	131153181	131187658	34478	1	16865	33021	ENSMUSG00000026427	Eif2d	eukaryotic translation initiation factor 2D	16865;226419;54354	0;-47862;0	gene_body	chr1:131186202-131186417	Eif2d	Tet
chr1	131204404	131204887	484	*	Intron (ENSMUST00000027688.14/54354, intron 2 of 5)	1	131176410	131245258	68849	2	54354	40371	ENSMUSG00000026430	Rassf5	Ras association (RalGDS/AF-6) domain family member 5	16865;54354;56489	0;0;74719	gene_body	chr1:131204404-131204887	Rassf5	Tet
chr1	131204493	131204834	342	*	Intron (ENSMUST00000027688.14/54354, intron 2 of 5)	1	131176410	131245258	68849	2	54354	40424	ENSMUSG00000026430	Rassf5	Ras association (RalGDS/AF-6) domain family member 5	16865;54354;56489	0;0;74772	gene_body	chr1:131204493-131204834	Rassf5	Tet
chr1	131204468	131204842	375	*	Intron (ENSMUST00000027688.14/54354, intron 2 of 5)	1	131176410	131245258	68849	2	54354	40416	ENSMUSG00000026430	Rassf5	Ras association (RalGDS/AF-6) domain family member 5	16865;54354;56489	0;0;74764	gene_body	chr1:131204468-131204842	Rassf5	Tet
chr1	131384525	131384794	270	*	Intron (ENSMUST00000097588.8/14270, intron 4 of 22)	1	131254343	131279606	25264	2	56489	-104919	ENSMUSG00000042349	Ikbke	inhibitor of kappaB kinase epsilon	14270	0	gene_body	chr1:131384525-131384794	Ikbke	Tet
chr1	131658160	131658400	241	*	Intron (ENSMUST00000073350.12/13034, intron 1 of 9)	1	131638306	131675505	37200	1	13034	19854	ENSMUSG00000004552	Ctse	cathepsin E	13034;226421;26361	0;-30295;58921	gene_body	chr1:131658160-131658400	Ctse	Tet
chr1	131828257	131828425	169	*	Promoter (<=1kb)	1	131827493	131848865	21373	1	98396	764	ENSMUSG00000013275	Slc41a1	solute carrier family 41, member 1	212933;226422;98396	30876;-38799;0	gene_body	chr1:131828257-131828425	Slc41a1	Tet
chr1	131910949	131911199	251	*	Promoter (<=1kb)	1	131910534	131936321	25788	1	98415	415	ENSMUSG00000026434	Nucks1	nuclear casein kinase and cyclin-dependent kinase substrate 1	226422;98415	43725;0	gene_body	chr1:131910949-131911199	Nucks1	Tet
chr1	131910950	131911123	174	*	Promoter (<=1kb)	1	131910534	131936321	25788	1	98415	416	ENSMUSG00000026434	Nucks1	nuclear casein kinase and cyclin-dependent kinase substrate 1	226422;98415	43726;0	gene_body	chr1:131910950-131911123	Nucks1	Tet
chr1	132010587	132011198	612	*	Intron (ENSMUST00000191034.1/212980, intron 2 of 2)	1	132007607	132032612	25006	1	13714	2980	ENSMUSG00000026436	Elk4	ELK4, member of ETS oncogene family	13714;212980;213006	0;0;0	gene_body	chr1:132010587-132011198	Elk4	Tet
chr1	132010817	132011113	297	*	Intron (ENSMUST00000191034.1/212980, intron 2 of 2)	1	132007607	132032612	25006	1	13714	3210	ENSMUSG00000026436	Elk4	ELK4, member of ETS oncogene family	13714;212980;213006	0;0;0	gene_body	chr1:132010817-132011113	Elk4	Tet
chr1	132038786	132038935	150	*	3' UTR	1	132022806	132068062	45257	2	213006	29127	ENSMUSG00000059149	Mfsd4a	major facilitator superfamily domain containing 4A	13714;212980;213006	0;0;0	gene_body	chr1:132038786-132038935	Mfsd4a	Tet
chr1	133046300	133046524	225	*	Promoter (<=1kb)	1	133045667	133108687	63021	1	240752	633	ENSMUSG00000026447	Pik3c2b	phosphatidylinositol-4-phosphate 3-kinase catalytic subunit type 2 beta	17248;240752	-15739;0	gene_body	chr1:133046300-133046524	Pik3c2b	Tet
chr1	133695002	133695239	238	*	Distal Intergenic	1	133679091	133690108	11018	2	240754	-4894	ENSMUSG00000051998	Lax1	lymphocyte transmembrane adaptor 1	102466206;240754;381290;667118;70579	31406;-4894;0;-34117;-33622	Distal Intergenic	chr1:133695002-133695239	Lax1	Tet
chr1	133771819	133772278	460	*	Intron (ENSMUST00000143567.7/381290, intron 1 of 20)	1	133699457	133801041	101585	2	381290	28763	ENSMUSG00000026463	Atp2b4	ATPase, Ca++ transporting, plasma membrane 4	102466206;381290	-45174;0	gene_body	chr1:133771819-133772278	Atp2b4	Tet
chr1	133771899	133772232	334	*	Intron (ENSMUST00000143567.7/381290, intron 1 of 20)	1	133699457	133801041	101585	2	381290	28809	ENSMUSG00000026463	Atp2b4	ATPase, Ca++ transporting, plasma membrane 4	102466206;381290	-45254;0	gene_body	chr1:133771899-133772232	Atp2b4	Tet
chr1	133771926	133772156	231	*	Intron (ENSMUST00000143567.7/381290, intron 1 of 20)	1	133699457	133801041	101585	2	381290	28885	ENSMUSG00000026463	Atp2b4	ATPase, Ca++ transporting, plasma membrane 4	102466206;381290	-45281;0	gene_body	chr1:133771926-133772156	Atp2b4	Tet
chr1	133815733	133816027	295	*	Distal Intergenic	1	133699457	133801041	101585	2	381290	-14692	ENSMUSG00000026463	Atp2b4	ATPase, Ca++ transporting, plasma membrane 4	381290	0	Distal Intergenic	chr1:133815733-133816027	Atp2b4	Tet
chr1	133815752	133815933	182	*	Distal Intergenic	1	133699457	133801041	101585	2	381290	-14711	ENSMUSG00000026463	Atp2b4	ATPase, Ca++ transporting, plasma membrane 4	381290	0	Distal Intergenic	chr1:133815752-133815933	Atp2b4	Tet
chr1	134058930	134059204	275	*	Distal Intergenic	1	134075170	134079120	3951	2	12227	19916	ENSMUSG00000020423	Btg2	BTG anti-proliferation factor 2	12227;14264	19916;21676	Distal Intergenic	chr1:134058930-134059204	Btg2	Tet
chr1	134060833	134061188	356	*	Distal Intergenic	1	134075170	134079120	3951	2	12227	17932	ENSMUSG00000020423	Btg2	BTG anti-proliferation factor 2	12227;14264	17932;23579	Distal Intergenic	chr1:134060833-134061188	Btg2	Tet
chr1	134065310	134065698	389	*	Distal Intergenic	1	134075170	134079120	3951	2	12227	13422	ENSMUSG00000020423	Btg2	BTG anti-proliferation factor 2	12227;14264;71884	13422;28056;-45544	Distal Intergenic	chr1:134065310-134065698	Btg2	Tet
chr1	134067192	134067369	178	*	Distal Intergenic	1	134075170	134079120	3951	2	12227	11751	ENSMUSG00000020423	Btg2	BTG anti-proliferation factor 2	12227;14264;71884	11751;29938;-43873	Distal Intergenic	chr1:134067192-134067369	Btg2	Tet
chr1	134060878	134061176	299	*	Distal Intergenic	1	134075170	134079120	3951	2	12227	17944	ENSMUSG00000020423	Btg2	BTG anti-proliferation factor 2	12227;14264	17944;23624	Distal Intergenic	chr1:134060878-134061176	Btg2	Tet
chr1	134067321	134067490	170	*	Distal Intergenic	1	134075170	134079120	3951	2	12227	11630	ENSMUSG00000020423	Btg2	BTG anti-proliferation factor 2	12227;14264;71884	11630;30067;-43752	Distal Intergenic	chr1:134067321-134067490	Btg2	Tet
chr1	134060869	134061199	331	*	Distal Intergenic	1	134075170	134079120	3951	2	12227	17921	ENSMUSG00000020423	Btg2	BTG anti-proliferation factor 2	12227;14264	17921;23615	Distal Intergenic	chr1:134060869-134061199	Btg2	Tet
chr1	134063204	134063370	167	*	Distal Intergenic	1	134075170	134079120	3951	2	12227	15750	ENSMUSG00000020423	Btg2	BTG anti-proliferation factor 2	12227;14264;71884	15750;25950;-47872	Distal Intergenic	chr1:134063204-134063370	Btg2	Tet
chr1	134065446	134065637	192	*	Distal Intergenic	1	134075170	134079120	3951	2	12227	13483	ENSMUSG00000020423	Btg2	BTG anti-proliferation factor 2	12227;14264;71884	13483;28192;-45605	Distal Intergenic	chr1:134065446-134065637	Btg2	Tet
chr1	134060892	134061069	178	*	Distal Intergenic	1	134075170	134079120	3951	2	12227	18051	ENSMUSG00000020423	Btg2	BTG anti-proliferation factor 2	12227;14264	18051;23638	Distal Intergenic	chr1:134060892-134061069	Btg2	Tet
chr1	134092910	134093737	828	*	Distal Intergenic	1	134075170	134079120	3951	2	12227	-13790	ENSMUSG00000020423	Btg2	BTG anti-proliferation factor 2	12227;14264;71884	-13790;55656;-17505	Distal Intergenic	chr1:134092910-134093737	Btg2	Tet
chr1	134093924	134094169	246	*	Distal Intergenic	1	134075170	134079120	3951	2	12227	-14804	ENSMUSG00000020423	Btg2	BTG anti-proliferation factor 2	12227;14264;71884	-14804;56670;-17073	Distal Intergenic	chr1:134093924-134094169	Btg2	Tet
chr1	134092995	134093372	378	*	Distal Intergenic	1	134075170	134079120	3951	2	12227	-13875	ENSMUSG00000020423	Btg2	BTG anti-proliferation factor 2	12227;14264;71884	-13875;55741;-17870	Distal Intergenic	chr1:134092995-134093372	Btg2	Tet
chr1	134093508	134093715	208	*	Distal Intergenic	1	134075170	134079120	3951	2	12227	-14388	ENSMUSG00000020423	Btg2	BTG anti-proliferation factor 2	12227;14264;71884	-14388;56254;-17527	Distal Intergenic	chr1:134093508-134093715	Btg2	Tet
chr1	134092908	134093311	404	*	Distal Intergenic	1	134075170	134079120	3951	2	12227	-13788	ENSMUSG00000020423	Btg2	BTG anti-proliferation factor 2	12227;14264;71884	-13788;55654;-17931	Distal Intergenic	chr1:134092908-134093311	Btg2	Tet
chr1	134092992	134093305	314	*	Distal Intergenic	1	134075170	134079120	3951	2	12227	-13872	ENSMUSG00000020423	Btg2	BTG anti-proliferation factor 2	12227;14264;71884	-13872;55738;-17937	Distal Intergenic	chr1:134092992-134093305	Btg2	Tet
chr1	134556899	134557269	371	*	Distal Intergenic	1	134560171	134635285	75115	1	75605	-2902	ENSMUSG00000042207	Kdm5b	lysine (K)-specific demethylase 5B	71001;75605;98710	-7217;0;62251	Distal Intergenic	chr1:134556899-134557269	Kdm5b	Tet
chr1	134556939	134557185	247	*	Distal Intergenic	1	134560171	134635285	75115	1	75605	-2986	ENSMUSG00000042207	Kdm5b	lysine (K)-specific demethylase 5B	71001;75605;98710	-7257;0;62291	Distal Intergenic	chr1:134556939-134557185	Kdm5b	Tet
chr1	134556383	134556559	177	*	Distal Intergenic	1	134560171	134635285	75115	1	75605	-3612	ENSMUSG00000042207	Kdm5b	lysine (K)-specific demethylase 5B	71001;75605;98710	-6701;0;61735	Distal Intergenic	chr1:134556383-134556559	Kdm5b	Tet
chr1	134556912	134557204	293	*	Distal Intergenic	1	134560171	134635285	75115	1	75605	-2967	ENSMUSG00000042207	Kdm5b	lysine (K)-specific demethylase 5B	71001;75605;98710	-7230;0;62264	Distal Intergenic	chr1:134556912-134557204	Kdm5b	Tet
chr1	134560905	134561054	150	*	Promoter (<=1kb)	1	134560171	134635285	75115	1	75605	734	ENSMUSG00000042207	Kdm5b	lysine (K)-specific demethylase 5B	71001;75605	-11223;0	gene_body	chr1:134560905-134561054	Kdm5b	Tet
chr1	134987530	134987855	326	*	Exon (ENSMUST00000044828.13/329252, exon 18 of 18)	1	134962565	134974162	11598	1	67196	24965	ENSMUSG00000026429	Ube2t	ubiquitin-conjugating enzyme E2T	329251;329252;67196	-31588;0;24965	gene_body	chr1:134987530-134987855	Ube2t	Tet
chr1	135144071	135144236	166	*	3' UTR	1	135146824	135156269	9446	1	68724	-2588	ENSMUSG00000026426	Arl8a	ADP-ribosylation factor-like 8A	13924;171469;320139;329252;68724	-11477;23445;0;0;-2588	gene_body	chr1:135144071-135144236	Arl8a	Tet
chr1	135631664	135631850	187	*	Intron (ENSMUST00000190298.7/215690, intron 1 of 30)	1	135584773	135599948	15176	1	215714	46891		Gm4793	predicted gene 4793	215690;215714	0;46891	gene_body	chr1:135631664-135631850	Gm4793	Tet
chr1	136135090	136135384	295	*	Intron (ENSMUST00000075164.10/16565, intron 1 of 34)	1	136131389	136177998	46610	1	16565	3701	ENSMUSG00000041642	Kif21b	kinesin family member 21B	12292;16565;329253;76422	82340;0;-3907;77444	gene_body	chr1:136135090-136135384	Kif21b	Tet
chr1	136140041	136140585	545	*	Intron (ENSMUST00000075164.10/16565, intron 1 of 34)	1	136131389	136177998	46610	1	16565	8652	ENSMUSG00000041642	Kif21b	kinesin family member 21B	12292;16565;329253;76422	87291;0;-8858;72243	gene_body	chr1:136140041-136140585	Kif21b	Tet
chr1	136135090	136135350	261	*	Intron (ENSMUST00000075164.10/16565, intron 1 of 34)	1	136131389	136177998	46610	1	16565	3701	ENSMUSG00000041642	Kif21b	kinesin family member 21B	12292;16565;329253;76422	82340;0;-3907;77478	gene_body	chr1:136135090-136135350	Kif21b	Tet
chr1	136140059	136140571	513	*	Intron (ENSMUST00000075164.10/16565, intron 1 of 34)	1	136131389	136177998	46610	1	16565	8670	ENSMUSG00000041642	Kif21b	kinesin family member 21B	12292;16565;329253;76422	87309;0;-8876;72257	gene_body	chr1:136140059-136140571	Kif21b	Tet
chr1	136140064	136140213	150	*	Intron (ENSMUST00000075164.10/16565, intron 1 of 34)	1	136131389	136177998	46610	1	16565	8675	ENSMUSG00000041642	Kif21b	kinesin family member 21B	12292;16565;329253;76422	87314;0;-8881;72615	gene_body	chr1:136140064-136140213	Kif21b	Tet
chr1	136140273	136140577	305	*	Intron (ENSMUST00000075164.10/16565, intron 1 of 34)	1	136131389	136177998	46610	1	16565	8884	ENSMUSG00000041642	Kif21b	kinesin family member 21B	12292;16565;329253;76422	87523;0;-9090;72251	gene_body	chr1:136140273-136140577	Kif21b	Tet
chr1	136140358	136140534	177	*	Intron (ENSMUST00000075164.10/16565, intron 1 of 34)	1	136131389	136177998	46610	1	16565	8969	ENSMUSG00000041642	Kif21b	kinesin family member 21B	12292;16565;329253;76422	87608;0;-9175;72294	gene_body	chr1:136140358-136140534	Kif21b	Tet
chr1	136538186	136538634	449	*	Distal Intergenic	1	136466343	136531511	65169	1	381293	71843	ENSMUSG00000041498	Kif14	kinesin family member 14	381293	71843	Distal Intergenic	chr1:136538186-136538634	Kif14	Tet
chr1	136600687	136601116	430	*	Distal Intergenic	1	136624901	136630053	5153	1	226442	-23785	ENSMUSG00000041483	Zfp281	zinc finger protein 281	226442	-23785	Distal Intergenic	chr1:136600687-136601116	Zfp281	Tet
chr1	136608411	136608686	276	*	Distal Intergenic	1	136624901	136630053	5153	1	226442	-16215	ENSMUSG00000041483	Zfp281	zinc finger protein 281	226442	-16215	Distal Intergenic	chr1:136608411-136608686	Zfp281	Tet
chr1	136658520	136658838	319	*	Distal Intergenic	1	136670769	136690804	20036	1	100503460	-11931	ENSMUSG00000097113	Gm19705	predicted gene, 19705	100503460;100503474;226442	0;-37373;33619	Distal Intergenic	chr1:136658520-136658838	Gm19705	Tet
chr1	136672571	136672878	308	*	Promoter (1-2kb)	1	136670769	136690804	20036	1	100503460	1802	ENSMUSG00000097113	Gm19705	predicted gene, 19705	100503460;100503474;226442	0;-23333;47670	gene_body	chr1:136672571-136672878	Gm19705	Tet
chr1	136672551	136672899	349	*	Promoter (1-2kb)	1	136670769	136690804	20036	1	100503460	1782	ENSMUSG00000097113	Gm19705	predicted gene, 19705	100503460;100503474;226442	0;-23312;47650	gene_body	chr1:136672551-136672899	Gm19705	Tet
chr1	136672636	136672820	185	*	Promoter (1-2kb)	1	136670769	136690804	20036	1	100503460	1867	ENSMUSG00000097113	Gm19705	predicted gene, 19705	100503460;100503474;226442	0;-23391;47735	gene_body	chr1:136672636-136672820	Gm19705	Tet
chr1	136685385	136685609	225	*	Intron (ENSMUST00000180495.7/100503460, intron 4 of 4)	1	136696211	136726142	29932	1	100503474	-10602		Platr22	pluripotency associated transcript 22	100503460;100503474	0;-10602	gene_body	chr1:136685385-136685609	Platr22	Tet
chr1	137900236	137900385	150	*	Intron (ENSMUST00000182127.1/ENSMUST00000182127.1, intron 1 of 2)	1	137966455	137966541	87	1	735252	-66070	ENSMUSG00000065565	Mir181a-1	microRNA 181a-1			gene_body	chr1:137900236-137900385	Mir181a-1	Tet
chr1	137900839	137901144	306	*	Intron (ENSMUST00000182127.1/ENSMUST00000182127.1, intron 1 of 2)	1	137966455	137966541	87	1	735252	-65311	ENSMUSG00000065565	Mir181a-1	microRNA 181a-1			gene_body	chr1:137900839-137901144	Mir181a-1	Tet
chr1	138039252	138039538	287	*	Distal Intergenic	1	137966531	137969918	3388	1	723890	72721	ENSMUSG00000065458	Mir181b-1	microRNA 181b-1	19264	0	Distal Intergenic	chr1:138039252-138039538	Mir181b-1	Tet
chr1	138136351	138136783	433	*	Intron (ENSMUST00000182283.7/19264, intron 2 of 29)	1	138062861	138175708	112848	2	19264	38925	ENSMUSG00000026395	Ptprc	protein tyrosine phosphatase, receptor type, C	19264	0	gene_body	chr1:138136351-138136783	Ptprc	Tet
chr1	138136469	138136742	274	*	Intron (ENSMUST00000182283.7/19264, intron 2 of 29)	1	138062861	138175708	112848	2	19264	38966	ENSMUSG00000026395	Ptprc	protein tyrosine phosphatase, receptor type, C	19264	0	gene_body	chr1:138136469-138136742	Ptprc	Tet
chr1	138136479	138136756	278	*	Intron (ENSMUST00000182283.7/19264, intron 2 of 29)	1	138062861	138175708	112848	2	19264	38952	ENSMUSG00000026395	Ptprc	protein tyrosine phosphatase, receptor type, C	19264	0	gene_body	chr1:138136479-138136756	Ptprc	Tet
chr1	138136461	138136699	239	*	Intron (ENSMUST00000182283.7/19264, intron 2 of 29)	1	138062861	138175708	112848	2	19264	39009	ENSMUSG00000026395	Ptprc	protein tyrosine phosphatase, receptor type, C	19264	0	gene_body	chr1:138136461-138136699	Ptprc	Tet
chr1	138142325	138142535	211	*	Intron (ENSMUST00000182283.7/19264, intron 2 of 29)	1	138062861	138175708	112848	2	19264	33173	ENSMUSG00000026395	Ptprc	protein tyrosine phosphatase, receptor type, C	19264	0	gene_body	chr1:138142325-138142535	Ptprc	Tet
chr1	138144478	138144639	162	*	Intron (ENSMUST00000182283.7/19264, intron 2 of 29)	1	138062861	138175708	112848	2	19264	31069	ENSMUSG00000026395	Ptprc	protein tyrosine phosphatase, receptor type, C	19264	0	gene_body	chr1:138144478-138144639	Ptprc	Tet
chr1	138148906	138149255	350	*	Intron (ENSMUST00000182283.7/19264, intron 2 of 29)	1	138062861	138175708	112848	2	19264	26453	ENSMUSG00000026395	Ptprc	protein tyrosine phosphatase, receptor type, C	19264	0	gene_body	chr1:138148906-138149255	Ptprc	Tet
chr1	138148872	138149204	333	*	Intron (ENSMUST00000182283.7/19264, intron 2 of 29)	1	138062861	138175708	112848	2	19264	26504	ENSMUSG00000026395	Ptprc	protein tyrosine phosphatase, receptor type, C	19264	0	gene_body	chr1:138148872-138149204	Ptprc	Tet
chr1	138162671	138163099	429	*	Exon (ENSMUST00000194467.1/ENSMUST00000194467.1, exon 1 of 1)	1	138062861	138175708	112848	2	19264	12609	ENSMUSG00000026395	Ptprc	protein tyrosine phosphatase, receptor type, C	19264	0	gene_body	chr1:138162671-138163099	Ptprc	Tet
chr1	138162709	138163001	293	*	Exon (ENSMUST00000194467.1/ENSMUST00000194467.1, exon 1 of 1)	1	138062861	138175708	112848	2	19264	12707	ENSMUSG00000026395	Ptprc	protein tyrosine phosphatase, receptor type, C	19264	0	gene_body	chr1:138162709-138163001	Ptprc	Tet
chr1	138166248	138166430	183	*	Exon (ENSMUST00000194467.1/ENSMUST00000194467.1, exon 1 of 1)	1	138062861	138175708	112848	2	19264	9278	ENSMUSG00000026395	Ptprc	protein tyrosine phosphatase, receptor type, C	19264	0	gene_body	chr1:138166248-138166430	Ptprc	Tet
chr1	138185944	138186256	313	*	Distal Intergenic	1	138062861	138175708	112848	2	19264	-10236	ENSMUSG00000026395	Ptprc	protein tyrosine phosphatase, receptor type, C	19264	0	Distal Intergenic	chr1:138185944-138186256	Ptprc	Tet
chr1	138185949	138186251	303	*	Distal Intergenic	1	138062861	138175708	112848	2	19264	-10241	ENSMUSG00000026395	Ptprc	protein tyrosine phosphatase, receptor type, C	19264	0	Distal Intergenic	chr1:138185949-138186251	Ptprc	Tet
chr1	138186065	138186214	150	*	Distal Intergenic	1	138062861	138175708	112848	2	19264	-10357	ENSMUSG00000026395	Ptprc	protein tyrosine phosphatase, receptor type, C	19264	0	Distal Intergenic	chr1:138186065-138186214	Ptprc	Tet
chr1	138275976	138276165	190	*	Intron (ENSMUST00000027643.5/338375, intron 1 of 2)	1	138273738	138289462	15725	1	338375	2238	ENSMUSG00000026394	Atp6v1g3	ATPase, H+ transporting, lysosomal V1 subunit G3	338375	0	gene_body	chr1:138275976-138276165	Atp6v1g3	Tet
chr1	138275975	138276138	164	*	Intron (ENSMUST00000027643.5/338375, intron 1 of 2)	1	138273738	138289462	15725	1	338375	2237	ENSMUSG00000026394	Atp6v1g3	ATPase, H+ transporting, lysosomal V1 subunit G3	338375	0	gene_body	chr1:138275975-138276138	Atp6v1g3	Tet
chr1	138288835	138289100	266	*	3' UTR	1	138273738	138289462	15725	1	338375	15097	ENSMUSG00000026394	Atp6v1g3	ATPase, H+ transporting, lysosomal V1 subunit G3	338375	0	gene_body	chr1:138288835-138289100	Atp6v1g3	Tet
chr1	138290029	138290393	365	*	Downstream (<1kb)	1	138273738	138289462	15725	1	338375	16291	ENSMUSG00000026394	Atp6v1g3	ATPase, H+ transporting, lysosomal V1 subunit G3	338375	0	gene_body	chr1:138290029-138290393	Atp6v1g3	Tet
chr1	138299556	138299909	354	*	Distal Intergenic	1	138273738	138289462	15725	1	338375	25818	ENSMUSG00000026394	Atp6v1g3	ATPase, H+ transporting, lysosomal V1 subunit G3	338375	0	Distal Intergenic	chr1:138299556-138299909	Atp6v1g3	Tet
chr1	138299606	138299941	336	*	Distal Intergenic	1	138273738	138289462	15725	1	338375	25868	ENSMUSG00000026394	Atp6v1g3	ATPase, H+ transporting, lysosomal V1 subunit G3	338375	0	Distal Intergenic	chr1:138299606-138299941	Atp6v1g3	Tet
chr1	138299624	138299852	229	*	Distal Intergenic	1	138273738	138289462	15725	1	338375	25886	ENSMUSG00000026394	Atp6v1g3	ATPase, H+ transporting, lysosomal V1 subunit G3	338375	0	Distal Intergenic	chr1:138299624-138299852	Atp6v1g3	Tet
chr1	138299661	138299870	210	*	Distal Intergenic	1	138273738	138289462	15725	1	338375	25923	ENSMUSG00000026394	Atp6v1g3	ATPase, H+ transporting, lysosomal V1 subunit G3	338375	0	Distal Intergenic	chr1:138299661-138299870	Atp6v1g3	Tet
chr1	138303215	138303569	355	*	Distal Intergenic	1	138273738	138289462	15725	1	338375	29477	ENSMUSG00000026394	Atp6v1g3	ATPase, H+ transporting, lysosomal V1 subunit G3	338375	0	Distal Intergenic	chr1:138303215-138303569	Atp6v1g3	Tet
chr1	138303989	138304755	767	*	Distal Intergenic	1	138273738	138289462	15725	1	338375	30251	ENSMUSG00000026394	Atp6v1g3	ATPase, H+ transporting, lysosomal V1 subunit G3	338375	0	Distal Intergenic	chr1:138303989-138304755	Atp6v1g3	Tet
chr1	138304135	138304431	297	*	Distal Intergenic	1	138273738	138289462	15725	1	338375	30397	ENSMUSG00000026394	Atp6v1g3	ATPase, H+ transporting, lysosomal V1 subunit G3	338375	0	Distal Intergenic	chr1:138304135-138304431	Atp6v1g3	Tet
chr1	138303364	138303546	183	*	Distal Intergenic	1	138273738	138289462	15725	1	338375	29626	ENSMUSG00000026394	Atp6v1g3	ATPase, H+ transporting, lysosomal V1 subunit G3	338375	0	Distal Intergenic	chr1:138303364-138303546	Atp6v1g3	Tet
chr1	138304240	138304497	258	*	Distal Intergenic	1	138273738	138289462	15725	1	338375	30502	ENSMUSG00000026394	Atp6v1g3	ATPase, H+ transporting, lysosomal V1 subunit G3	338375	0	Distal Intergenic	chr1:138304240-138304497	Atp6v1g3	Tet
chr1	138327443	138327619	177	*	Distal Intergenic	1	138273738	138289462	15725	1	338375	53705	ENSMUSG00000026394	Atp6v1g3	ATPase, H+ transporting, lysosomal V1 subunit G3	338375	0	Distal Intergenic	chr1:138327443-138327619	Atp6v1g3	Tet
chr1	138517031	138517240	210	*	Intron (ENSMUST00000188729.2/ENSMUST00000188729.2, intron 1 of 2)	1	138482875	138620141	137267	2	59125	102901	ENSMUSG00000026393	Nek7	NIMA (never in mitosis gene a)-related expressed kinase 7	59125	0	gene_body	chr1:138517031-138517240	Nek7	Tet
chr1	138517493	138517689	197	*	Intron (ENSMUST00000188729.2/ENSMUST00000188729.2, intron 1 of 2)	1	138482875	138620141	137267	2	59125	102452	ENSMUSG00000026393	Nek7	NIMA (never in mitosis gene a)-related expressed kinase 7	59125	0	gene_body	chr1:138517493-138517689	Nek7	Tet
chr1	138517476	138517662	187	*	Intron (ENSMUST00000188729.2/ENSMUST00000188729.2, intron 1 of 2)	1	138482875	138620141	137267	2	59125	102479	ENSMUSG00000026393	Nek7	NIMA (never in mitosis gene a)-related expressed kinase 7	59125	0	gene_body	chr1:138517476-138517662	Nek7	Tet
chr1	138542699	138542948	250	*	Intron (ENSMUST00000188729.2/ENSMUST00000188729.2, intron 2 of 2)	1	138482875	138620141	137267	2	59125	77193	ENSMUSG00000026393	Nek7	NIMA (never in mitosis gene a)-related expressed kinase 7	59125	0	gene_body	chr1:138542699-138542948	Nek7	Tet
chr1	138550280	138550631	352	*	Intron (ENSMUST00000186017.6/59125, intron 2 of 9)	1	138482875	138620141	137267	2	59125	69510	ENSMUSG00000026393	Nek7	NIMA (never in mitosis gene a)-related expressed kinase 7	59125	0	gene_body	chr1:138550280-138550631	Nek7	Tet
chr1	138550338	138550655	318	*	Intron (ENSMUST00000186017.6/59125, intron 2 of 9)	1	138482875	138620141	137267	2	59125	69486	ENSMUSG00000026393	Nek7	NIMA (never in mitosis gene a)-related expressed kinase 7	59125	0	gene_body	chr1:138550338-138550655	Nek7	Tet
chr1	138559636	138559967	332	*	Intron (ENSMUST00000186017.6/59125, intron 2 of 9)	1	138482875	138620141	137267	2	59125	60174	ENSMUSG00000026393	Nek7	NIMA (never in mitosis gene a)-related expressed kinase 7	59125	0	gene_body	chr1:138559636-138559967	Nek7	Tet
chr1	138560785	138561119	335	*	Intron (ENSMUST00000186017.6/59125, intron 2 of 9)	1	138482875	138620141	137267	2	59125	59022	ENSMUSG00000026393	Nek7	NIMA (never in mitosis gene a)-related expressed kinase 7	59125	0	gene_body	chr1:138560785-138561119	Nek7	Tet
chr1	138560796	138561062	267	*	Intron (ENSMUST00000186017.6/59125, intron 2 of 9)	1	138482875	138620141	137267	2	59125	59079	ENSMUSG00000026393	Nek7	NIMA (never in mitosis gene a)-related expressed kinase 7	59125	0	gene_body	chr1:138560796-138561062	Nek7	Tet
chr1	138584673	138584968	296	*	Intron (ENSMUST00000186017.6/59125, intron 1 of 9)	1	138482875	138620141	137267	2	59125	35173	ENSMUSG00000026393	Nek7	NIMA (never in mitosis gene a)-related expressed kinase 7	59125	0	gene_body	chr1:138584673-138584968	Nek7	Tet
chr1	138587884	138588122	239	*	Intron (ENSMUST00000186017.6/59125, intron 1 of 9)	1	138482875	138620141	137267	2	59125	32019	ENSMUSG00000026393	Nek7	NIMA (never in mitosis gene a)-related expressed kinase 7	59125	0	gene_body	chr1:138587884-138588122	Nek7	Tet
chr1	138592583	138592808	226	*	Intron (ENSMUST00000186017.6/59125, intron 1 of 9)	1	138482875	138620141	137267	2	59125	27333	ENSMUSG00000026393	Nek7	NIMA (never in mitosis gene a)-related expressed kinase 7	545363;59125	89269;0	gene_body	chr1:138592583-138592808	Nek7	Tet
chr1	138596208	138596620	413	*	Intron (ENSMUST00000186017.6/59125, intron 1 of 9)	1	138482875	138620141	137267	2	59125	23521	ENSMUSG00000026393	Nek7	NIMA (never in mitosis gene a)-related expressed kinase 7	545363;59125	85457;0	gene_body	chr1:138596208-138596620	Nek7	Tet
chr1	138603871	138604358	488	*	Intron (ENSMUST00000186017.6/59125, intron 1 of 9)	1	138482875	138620141	137267	2	59125	15783	ENSMUSG00000026393	Nek7	NIMA (never in mitosis gene a)-related expressed kinase 7	545363;59125	77719;0	gene_body	chr1:138603871-138604358	Nek7	Tet
chr1	138603851	138604172	322	*	Intron (ENSMUST00000186017.6/59125, intron 1 of 9)	1	138482875	138620141	137267	2	59125	15969	ENSMUSG00000026393	Nek7	NIMA (never in mitosis gene a)-related expressed kinase 7	545363;59125	77905;0	gene_body	chr1:138603851-138604172	Nek7	Tet
chr1	138609282	138609436	155	*	Intron (ENSMUST00000186017.6/59125, intron 1 of 9)	1	138482875	138620141	137267	2	59125	10705	ENSMUSG00000026393	Nek7	NIMA (never in mitosis gene a)-related expressed kinase 7	545363;59125	72641;0	gene_body	chr1:138609282-138609436	Nek7	Tet
chr1	138614643	138614826	184	*	Intron (ENSMUST00000186017.6/59125, intron 1 of 9)	1	138482875	138620141	137267	2	59125	5315	ENSMUSG00000026393	Nek7	NIMA (never in mitosis gene a)-related expressed kinase 7	545363;59125	67251;0	gene_body	chr1:138614643-138614826	Nek7	Tet
chr1	138617946	138618272	327	*	Promoter (1-2kb)	1	138482875	138620141	137267	2	59125	1869	ENSMUSG00000026393	Nek7	NIMA (never in mitosis gene a)-related expressed kinase 7	545363;59125	63805;0	gene_body	chr1:138617946-138618272	Nek7	Tet
chr1	138619143	138619451	309	*	Promoter (<=1kb)	1	138482875	138620141	137267	2	59125	690	ENSMUSG00000026393	Nek7	NIMA (never in mitosis gene a)-related expressed kinase 7	545363;59125	62626;0	gene_body	chr1:138619143-138619451	Nek7	Tet
chr1	138617938	138618213	276	*	Promoter (1-2kb)	1	138482875	138620141	137267	2	59125	1928	ENSMUSG00000026393	Nek7	NIMA (never in mitosis gene a)-related expressed kinase 7	545363;59125	63864;0	gene_body	chr1:138617938-138618213	Nek7	Tet
chr1	138618009	138618236	228	*	Promoter (1-2kb)	1	138482875	138620141	137267	2	59125	1905	ENSMUSG00000026393	Nek7	NIMA (never in mitosis gene a)-related expressed kinase 7	545363;59125	63841;0	gene_body	chr1:138618009-138618236	Nek7	Tet
chr1	138617981	138618225	245	*	Promoter (1-2kb)	1	138482875	138620141	137267	2	59125	1916	ENSMUSG00000026393	Nek7	NIMA (never in mitosis gene a)-related expressed kinase 7	545363;59125	63852;0	gene_body	chr1:138617981-138618225	Nek7	Tet
chr1	138973587	138974011	425	*	Intron (ENSMUST00000200533.4/329260, intron 2 of 9)	1	138977656	138979246	1591	1	78229	-3645	ENSMUSG00000104900	4930596I21Rik	RIKEN cDNA 4930596I21 gene	329260;78229	0;-3645	gene_body	chr1:138973587-138974011	4930596I21Rik	Tet
chr1	141898032	141898266	235	*	Distal Intergenic	1	140570176	140656404	86229	2	75910	-1241628	ENSMUSG00000102368	4930590L20Rik	RIKEN cDNA 4930590L20 gene			Distal Intergenic	chr1:141898032-141898266	4930590L20Rik	Tet
chr1	143916701	143916903	203	*	Distal Intergenic	1	143999338	144004161	4824	2	19735	87258	ENSMUSG00000026360	Rgs2	regulator of G-protein signaling 2			Distal Intergenic	chr1:143916701-143916903	Rgs2	Tet
chr1	143916705	143916895	191	*	Distal Intergenic	1	143999338	144004161	4824	2	19735	87266	ENSMUSG00000026360	Rgs2	regulator of G-protein signaling 2			Distal Intergenic	chr1:143916705-143916895	Rgs2	Tet
chr1	143919016	143919171	156	*	Distal Intergenic	1	143999338	144004161	4824	2	19735	84990	ENSMUSG00000026360	Rgs2	regulator of G-protein signaling 2			Distal Intergenic	chr1:143919016-143919171	Rgs2	Tet
chr1	144006575	144006828	254	*	Distal Intergenic	1	143999338	144004161	4824	2	19735	-2414	ENSMUSG00000026360	Rgs2	regulator of G-protein signaling 2	19735	-2414	Distal Intergenic	chr1:144006575-144006828	Rgs2	Tet
chr1	144273068	144273285	218	*	Distal Intergenic	1	144242296	144249242	6947	2	50778	-23826	ENSMUSG00000026358	Rgs1	regulator of G-protein signaling 1	50778	-23826	Distal Intergenic	chr1:144273068-144273285	Rgs1	Tet
chr1	144300820	144300980	161	*	Distal Intergenic	1	144242296	144249242	6947	2	50778	-51578	ENSMUSG00000026358	Rgs1	regulator of G-protein signaling 1			Distal Intergenic	chr1:144300820-144300980	Rgs1	Tet
chr1	144307121	144307356	236	*	Distal Intergenic	1	144242296	144249242	6947	2	50778	-57879	ENSMUSG00000026358	Rgs1	regulator of G-protein signaling 1			Distal Intergenic	chr1:144307121-144307356	Rgs1	Tet
chr1	144308365	144308659	295	*	Distal Intergenic	1	144242296	144249242	6947	2	50778	-59123	ENSMUSG00000026358	Rgs1	regulator of G-protein signaling 1			Distal Intergenic	chr1:144308365-144308659	Rgs1	Tet
chr1	144330324	144330897	574	*	Distal Intergenic	1	144242296	144249242	6947	2	50778	-81082	ENSMUSG00000026358	Rgs1	regulator of G-protein signaling 1			Distal Intergenic	chr1:144330324-144330897	Rgs1	Tet
chr1	144330419	144330849	431	*	Distal Intergenic	1	144242296	144249242	6947	2	50778	-81177	ENSMUSG00000026358	Rgs1	regulator of G-protein signaling 1			Distal Intergenic	chr1:144330419-144330849	Rgs1	Tet
chr1	144330419	144330783	365	*	Distal Intergenic	1	144242296	144249242	6947	2	50778	-81177	ENSMUSG00000026358	Rgs1	regulator of G-protein signaling 1			Distal Intergenic	chr1:144330419-144330783	Rgs1	Tet
chr1	144330404	144330674	271	*	Distal Intergenic	1	144242296	144249242	6947	2	50778	-81162	ENSMUSG00000026358	Rgs1	regulator of G-protein signaling 1			Distal Intergenic	chr1:144330404-144330674	Rgs1	Tet
chr1	144337635	144337854	220	*	Distal Intergenic	1	144242296	144249242	6947	2	50778	-88393	ENSMUSG00000026358	Rgs1	regulator of G-protein signaling 1			Distal Intergenic	chr1:144337635-144337854	Rgs1	Tet
chr1	151084183	151084343	161	*	Distal Intergenic	1	151138034	151142345	4312	1	402734	-53691		C730036E19Rik	RIKEN cDNA C730036E19 gene			Distal Intergenic	chr1:151084183-151084343	C730036E19Rik	Tet
chr1	151086902	151087168	267	*	Distal Intergenic	1	151138034	151142345	4312	1	402734	-50866		C730036E19Rik	RIKEN cDNA C730036E19 gene			Distal Intergenic	chr1:151086902-151087168	C730036E19Rik	Tet
chr1	151103097	151103251	155	*	Distal Intergenic	1	151138034	151142345	4312	1	402734	-34783		C730036E19Rik	RIKEN cDNA C730036E19 gene	402734	-34783	Distal Intergenic	chr1:151103097-151103251	C730036E19Rik	Tet
chr1	151177152	151178155	1004	*	Distal Intergenic	1	151138034	151142345	4312	1	402734	39118		C730036E19Rik	RIKEN cDNA C730036E19 gene	402734	39118	Distal Intergenic	chr1:151177152-151178155	C730036E19Rik	Tet
chr1	151177170	151177583	414	*	Distal Intergenic	1	151138034	151142345	4312	1	402734	39136		C730036E19Rik	RIKEN cDNA C730036E19 gene	402734	39136	Distal Intergenic	chr1:151177170-151177583	C730036E19Rik	Tet
chr1	151177672	151178140	469	*	Distal Intergenic	1	151138034	151142345	4312	1	402734	39638		C730036E19Rik	RIKEN cDNA C730036E19 gene	402734	39638	Distal Intergenic	chr1:151177672-151178140	C730036E19Rik	Tet
chr1	151177753	151178118	366	*	Distal Intergenic	1	151138034	151142345	4312	1	402734	39719		C730036E19Rik	RIKEN cDNA C730036E19 gene	402734	39719	Distal Intergenic	chr1:151177753-151178118	C730036E19Rik	Tet
chr1	151177812	151178132	321	*	Distal Intergenic	1	151138034	151142345	4312	1	402734	39778		C730036E19Rik	RIKEN cDNA C730036E19 gene	402734	39778	Distal Intergenic	chr1:151177812-151178132	C730036E19Rik	Tet
chr1	151236754	151236912	159	*	Distal Intergenic	1	151138034	151142345	4312	1	402734	98720		C730036E19Rik	RIKEN cDNA C730036E19 gene			Distal Intergenic	chr1:151236754-151236912	C730036E19Rik	Tet
chr1	151236719	151236942	224	*	Distal Intergenic	1	151138034	151142345	4312	1	402734	98685		C730036E19Rik	RIKEN cDNA C730036E19 gene			Distal Intergenic	chr1:151236719-151236942	C730036E19Rik	Tet
chr1	151236664	151236839	176	*	Distal Intergenic	1	151138034	151142345	4312	1	402734	98630		C730036E19Rik	RIKEN cDNA C730036E19 gene			Distal Intergenic	chr1:151236664-151236839	C730036E19Rik	Tet
chr1	151287616	151287869	254	*	Distal Intergenic	1	151344477	151364422	19946	1	117198	-56608	ENSMUSG00000023150	Ivns1abp	influenza virus NS1A binding protein			Distal Intergenic	chr1:151287616-151287869	Ivns1abp	Tet
chr1	151287706	151287867	162	*	Distal Intergenic	1	151344477	151364422	19946	1	117198	-56610	ENSMUSG00000023150	Ivns1abp	influenza virus NS1A binding protein			Distal Intergenic	chr1:151287706-151287867	Ivns1abp	Tet
chr1	151571899	151572100	202	*	Promoter (<=1kb)	1	151571186	151721939	150754	1	63913	713	ENSMUSG00000026483	Niban1	niban apoptosis regulator 1	63913	0	gene_body	chr1:151571899-151572100	Niban1	Tet
chr1	151682857	151683213	357	*	Intron (ENSMUST00000148810.7/63913, intron 5 of 13)	1	151748949	151755018	6070	2	102640772	71805	ENSMUSG00000100594	2810414N06Rik	RIKEN cDNA 2810414N06 gene	63913	0	gene_body	chr1:151682857-151683213	2810414N06Rik	Tet
chr1	151682962	151683254	293	*	Intron (ENSMUST00000148810.7/63913, intron 5 of 13)	1	151748949	151755018	6070	2	102640772	71764	ENSMUSG00000100594	2810414N06Rik	RIKEN cDNA 2810414N06 gene	63913	0	gene_body	chr1:151682962-151683254	2810414N06Rik	Tet
chr1	151682965	151683148	184	*	Intron (ENSMUST00000148810.7/63913, intron 5 of 13)	1	151748949	151755018	6070	2	102640772	71870	ENSMUSG00000100594	2810414N06Rik	RIKEN cDNA 2810414N06 gene	63913	0	gene_body	chr1:151682965-151683148	2810414N06Rik	Tet
chr1	151685166	151685388	223	*	Intron (ENSMUST00000148810.7/63913, intron 5 of 13)	1	151748949	151755018	6070	2	102640772	69630	ENSMUSG00000100594	2810414N06Rik	RIKEN cDNA 2810414N06 gene	63913	0	gene_body	chr1:151685166-151685388	2810414N06Rik	Tet
chr1	152287701	152287936	236	*	Distal Intergenic	1	152370735	152386688	15954	2	66637	98752	ENSMUSG00000014980	Tsen15	tRNA splicing endonuclease subunit 15			Distal Intergenic	chr1:152287701-152287936	Tsen15	Tet
chr1	152768853	152769042	190	*	Exon (ENSMUST00000077755.10/67771, exon 2 of 4)	1	152766542	152775597	9056	1	67771	2311	ENSMUSG00000008475	Arpc5	actin related protein 2/3 complex, subunit 5	17970;19731;67771;71281	-31152;-2502;0;18302	gene_body	chr1:152768853-152769042	Arpc5	Tet
chr1	152902121	152902313	193	*	Promoter (<=1kb)	1	152836995	152902646	65652	2	226517	333	ENSMUSG00000042772	Smg7	Smg-7 homolog, nonsense mediated mRNA decay factor (C. elegans)	226517	0	gene_body	chr1:152902121-152902313	Smg7	Tet
chr1	153085187	153085559	373	*	Intron (ENSMUST00000186368.6/226518, intron 4 of 11)	1	153122756	153186447	63692	2	16782	100888	ENSMUSG00000026479	Lamc2	laminin, gamma 2	16782;226518	100888;0	gene_body	chr1:153085187-153085559	Lamc2	Tet
chr1	153085203	153085545	343	*	Intron (ENSMUST00000186368.6/226518, intron 4 of 11)	1	153122756	153186447	63692	2	16782	100902	ENSMUSG00000026479	Lamc2	laminin, gamma 2	16782;226518	100902;0	gene_body	chr1:153085203-153085545	Lamc2	Tet
chr1	153085217	153085629	413	*	Intron (ENSMUST00000186368.6/226518, intron 4 of 11)	1	153122756	153186447	63692	2	16782	100818	ENSMUSG00000026479	Lamc2	laminin, gamma 2	16782;226518	100818;0	gene_body	chr1:153085217-153085629	Lamc2	Tet
chr1	153085307	153085477	171	*	Intron (ENSMUST00000186368.6/226518, intron 4 of 11)	1	153122756	153186447	63692	2	16782	100970	ENSMUSG00000026479	Lamc2	laminin, gamma 2	16782;226518	100970;0	gene_body	chr1:153085307-153085477	Lamc2	Tet
chr1	153297064	153297213	150	*	Intron (ENSMUST00000027752.14/226519, intron 1 of 27)	1	153218922	153332786	113865	2	226519	35573	ENSMUSG00000026478	Lamc1	laminin, gamma 1	226519	0	gene_body	chr1:153297064-153297213	Lamc1	Tet
chr1	153332033	153332280	248	*	Promoter (<=1kb)	1	153218922	153332786	113865	2	226519	506	ENSMUSG00000026478	Lamc1	laminin, gamma 1	226519	0	gene_body	chr1:153332033-153332280	Lamc1	Tet
chr1	153332135	153332365	231	*	Promoter (<=1kb)	1	153218922	153332786	113865	2	226519	421	ENSMUSG00000026478	Lamc1	laminin, gamma 1	226519	0	gene_body	chr1:153332135-153332365	Lamc1	Tet
chr1	153413597	153413778	182	*	Promoter (<=1kb)	1	153404827	153414233	9407	2	626058	455		E330020D12Rik	Riken cDNA E330020D12 gene	13211;626058;71836	0;0;-11384	gene_body	chr1:153413597-153413778	E330020D12Rik	Tet
chr1	153413528	153413722	195	*	Promoter (<=1kb)	1	153404827	153414233	9407	2	626058	511		E330020D12Rik	Riken cDNA E330020D12 gene	13211;626058;71836	0;0;-11440	gene_body	chr1:153413528-153413722	E330020D12Rik	Tet
chr1	153486800	153487121	322	*	Promoter (<=1kb)	1	153455758	153487660	31903	2	13211	539	ENSMUSG00000042699	Dhx9	DEAH (Asp-Glu-Ala-His) box polypeptide 9	13211;71836;74091	0;61638;0	gene_body	chr1:153486800-153487121	Dhx9	Tet
chr1	153486893	153487268	376	*	Promoter (<=1kb)	1	153455758	153487660	31903	2	13211	392	ENSMUSG00000042699	Dhx9	DEAH (Asp-Glu-Ala-His) box polypeptide 9	13211;71836;74091	0;61731;0	gene_body	chr1:153486893-153487268	Dhx9	Tet
chr1	153486824	153487008	185	*	Promoter (<=1kb)	1	153455758	153487660	31903	2	13211	652	ENSMUSG00000042699	Dhx9	DEAH (Asp-Glu-Ala-His) box polypeptide 9	13211;71836;74091	0;61662;0	gene_body	chr1:153486824-153487008	Dhx9	Tet
chr1	153487105	153487287	183	*	Promoter (<=1kb)	1	153455758	153487660	31903	2	13211	373	ENSMUSG00000042699	Dhx9	DEAH (Asp-Glu-Ala-His) box polypeptide 9	13211;71836;74091	0;61943;0	gene_body	chr1:153487105-153487287	Dhx9	Tet
chr1	153532386	153532630	245	*	Intron (ENSMUST00000041874.8/74091, intron 4 of 11)	1	153503015	153550045	47031	2	74091	17415	ENSMUSG00000042684	Npl	N-acetylneuraminate pyruvate lyase	13211;74091	0;0	gene_body	chr1:153532386-153532630	Npl	Tet
chr1	153532417	153532566	150	*	Intron (ENSMUST00000041874.8/74091, intron 4 of 11)	1	153503015	153550045	47031	2	74091	17479	ENSMUSG00000042684	Npl	N-acetylneuraminate pyruvate lyase	13211;74091	0;0	gene_body	chr1:153532417-153532566	Npl	Tet
chr1	153559362	153559564	203	*	Distal Intergenic	1	153503015	153550045	47031	2	74091	-9317	ENSMUSG00000042684	Npl	N-acetylneuraminate pyruvate lyase	74091	0	Distal Intergenic	chr1:153559362-153559564	Npl	Tet
chr1	153583221	153583550	330	*	Distal Intergenic	1	153503015	153550045	47031	2	74091	-33176	ENSMUSG00000042684	Npl	N-acetylneuraminate pyruvate lyase	74091	0	Distal Intergenic	chr1:153583221-153583550	Npl	Tet
chr1	153617258	153617817	560	*	Distal Intergenic	1	153653025	153700323	47299	1	67792	-35208	ENSMUSG00000042671	Rgs8	regulator of G-protein signaling 8	67792	0	Distal Intergenic	chr1:153617258-153617817	Rgs8	Tet
chr1	153617374	153617722	349	*	Distal Intergenic	1	153653025	153700323	47299	1	67792	-35303	ENSMUSG00000042671	Rgs8	regulator of G-protein signaling 8	67792	0	Distal Intergenic	chr1:153617374-153617722	Rgs8	Tet
chr1	153691268	153691428	161	*	Intron (ENSMUST00000041776.11/67792, intron 6 of 6)	1	153653025	153700323	47299	1	67792	38243	ENSMUSG00000042671	Rgs8	regulator of G-protein signaling 8	19734;329271;67792	-48921;0;0	gene_body	chr1:153691268-153691428	Rgs8	Tet
chr1	153702833	153703113	281	*	Downstream (2-3kb)	1	153721240	153737829	16590	2	329271	34716	ENSMUSG00000100334	C230024C17Rik	RIKEN cDNA C230024C17 gene	19734;24014;329271;67792	-37236;-46313;0;0	gene_body	chr1:153702833-153703113	C230024C17Rik	Tet
chr1	153723310	153723940	631	*	Exon (ENSMUST00000190663.1/329271, exon 3 of 3)	1	153721240	153737829	16590	2	329271	13889	ENSMUSG00000100334	C230024C17Rik	RIKEN cDNA C230024C17 gene	19734;24014;329271;67792	-16409;-25486;0;0	gene_body	chr1:153723310-153723940	C230024C17Rik	Tet
chr1	153723379	153723846	468	*	Exon (ENSMUST00000190663.1/329271, exon 3 of 3)	1	153721240	153737829	16590	2	329271	13983	ENSMUSG00000100334	C230024C17Rik	RIKEN cDNA C230024C17 gene	19734;24014;329271;67792	-16503;-25580;0;0	gene_body	chr1:153723379-153723846	C230024C17Rik	Tet
chr1	153723393	153723810	418	*	Exon (ENSMUST00000190663.1/329271, exon 3 of 3)	1	153721240	153737829	16590	2	329271	14019	ENSMUSG00000100334	C230024C17Rik	RIKEN cDNA C230024C17 gene	19734;24014;329271;67792	-16539;-25616;0;0	gene_body	chr1:153723393-153723810	C230024C17Rik	Tet
chr1	153723349	153723754	406	*	Exon (ENSMUST00000190663.1/329271, exon 3 of 3)	1	153721240	153737829	16590	2	329271	14075	ENSMUSG00000100334	C230024C17Rik	RIKEN cDNA C230024C17 gene	19734;24014;329271;67792	-16595;-25672;0;0	gene_body	chr1:153723349-153723754	C230024C17Rik	Tet
chr1	153745502	153745715	214	*	Intron (ENSMUST00000191474.1/ENSMUST00000191474.1, intron 1 of 1)	1	153749426	153764221	14796	1	24014	-3711	ENSMUSG00000066800	Rnasel	ribonuclease L (2', 5'-oligoisoadenylate synthetase-dependent)	19734;24014;240816;329271;67792	5153;-3711;98427;0;0	gene_body	chr1:153745502-153745715	Rnasel	Tet
chr1	155027580	155027945	366	*	Intron (ENSMUST00000190720.1/ENSMUST00000190720.1, intron 1 of 3)	1	155063447	155083266	19820	2	671336	55321	ENSMUSG00000096950	Gm9530	predicted gene 9530	671336	55321	gene_body	chr1:155027580-155027945	Gm9530	Tet
chr1	155029277	155029436	160	*	Intron (ENSMUST00000190720.1/ENSMUST00000190720.1, intron 1 of 3)	1	155063447	155083266	19820	2	671336	53830	ENSMUSG00000096950	Gm9530	predicted gene 9530	671336	53830	gene_body	chr1:155029277-155029436	Gm9530	Tet
chr1	155027622	155027919	298	*	Intron (ENSMUST00000190720.1/ENSMUST00000190720.1, intron 1 of 3)	1	155063447	155083266	19820	2	671336	55347	ENSMUSG00000096950	Gm9530	predicted gene 9530	671336	55347	gene_body	chr1:155027622-155027919	Gm9530	Tet
chr1	155027627	155027954	328	*	Intron (ENSMUST00000190720.1/ENSMUST00000190720.1, intron 1 of 3)	1	155063447	155083266	19820	2	671336	55312	ENSMUSG00000096950	Gm9530	predicted gene 9530	671336	55312	gene_body	chr1:155027627-155027954	Gm9530	Tet
chr1	155027694	155027873	180	*	Intron (ENSMUST00000190720.1/ENSMUST00000190720.1, intron 1 of 3)	1	155063447	155083266	19820	2	671336	55393	ENSMUSG00000096950	Gm9530	predicted gene 9530	671336	55393	gene_body	chr1:155027694-155027873	Gm9530	Tet
chr1	155040144	155040635	492	*	Intron (ENSMUST00000190720.1/ENSMUST00000190720.1, intron 1 of 3)	1	155063447	155083266	19820	2	671336	42631	ENSMUSG00000096950	Gm9530	predicted gene 9530	671336	42631	gene_body	chr1:155040144-155040635	Gm9530	Tet
chr1	155040122	155040607	486	*	Intron (ENSMUST00000190720.1/ENSMUST00000190720.1, intron 1 of 3)	1	155063447	155083266	19820	2	671336	42659	ENSMUSG00000096950	Gm9530	predicted gene 9530	671336	42659	gene_body	chr1:155040122-155040607	Gm9530	Tet
chr1	155040179	155040620	442	*	Intron (ENSMUST00000190720.1/ENSMUST00000190720.1, intron 1 of 3)	1	155063447	155083266	19820	2	671336	42646	ENSMUSG00000096950	Gm9530	predicted gene 9530	671336	42646	gene_body	chr1:155040179-155040620	Gm9530	Tet
chr1	155040229	155040378	150	*	Intron (ENSMUST00000190720.1/ENSMUST00000190720.1, intron 1 of 3)	1	155063447	155083266	19820	2	671336	42888	ENSMUSG00000096950	Gm9530	predicted gene 9530	671336	42888	gene_body	chr1:155040229-155040378	Gm9530	Tet
chr1	155049043	155049252	210	*	Intron (ENSMUST00000190720.1/ENSMUST00000190720.1, intron 1 of 3)	1	155063447	155083266	19820	2	671336	34014	ENSMUSG00000096950	Gm9530	predicted gene 9530	15939;671336	0;34014	gene_body	chr1:155049043-155049252	Gm9530	Tet
chr1	155050209	155050509	301	*	Intron (ENSMUST00000190720.1/ENSMUST00000190720.1, intron 1 of 3)	1	155063447	155083266	19820	2	671336	32757	ENSMUSG00000096950	Gm9530	predicted gene 9530	15939;671336	0;32757	gene_body	chr1:155050209-155050509	Gm9530	Tet
chr1	155051238	155051433	196	*	Intron (ENSMUST00000190720.1/ENSMUST00000190720.1, intron 1 of 3)	1	155063447	155083266	19820	2	671336	31833	ENSMUSG00000096950	Gm9530	predicted gene 9530	15939;671336	0;31833	gene_body	chr1:155051238-155051433	Gm9530	Tet
chr1	155050280	155050532	253	*	Intron (ENSMUST00000190720.1/ENSMUST00000190720.1, intron 1 of 3)	1	155063447	155083266	19820	2	671336	32734	ENSMUSG00000096950	Gm9530	predicted gene 9530	15939;671336	0;32734	gene_body	chr1:155050280-155050532	Gm9530	Tet
chr1	155059499	155059941	443	*	Distal Intergenic	1	155063447	155083266	19820	2	671336	23325	ENSMUSG00000096950	Gm9530	predicted gene 9530	15939;671336	0;23325	Distal Intergenic	chr1:155059499-155059941	Gm9530	Tet
chr1	155059461	155059895	435	*	Distal Intergenic	1	155063447	155083266	19820	2	671336	23371	ENSMUSG00000096950	Gm9530	predicted gene 9530	15939;671336	0;23371	Distal Intergenic	chr1:155059461-155059895	Gm9530	Tet
chr1	155059620	155059979	360	*	Distal Intergenic	1	155063447	155083266	19820	2	671336	23287	ENSMUSG00000096950	Gm9530	predicted gene 9530	15939;671336	0;23287	Distal Intergenic	chr1:155059620-155059979	Gm9530	Tet
chr1	155086979	155087286	308	*	Distal Intergenic	1	155063447	155083266	19820	2	671336	-3713	ENSMUSG00000096950	Gm9530	predicted gene 9530	15064;15939;671336	59528;0;-3713	Distal Intergenic	chr1:155086979-155087286	Gm9530	Tet
chr1	155087083	155087294	212	*	Distal Intergenic	1	155063447	155083266	19820	2	671336	-3817	ENSMUSG00000096950	Gm9530	predicted gene 9530	15064;15939;671336	59520;0;-3817	Distal Intergenic	chr1:155087083-155087294	Gm9530	Tet
chr1	155097913	155098395	483	*	Promoter (1-2kb)	1	155096361	155099636	3276	2	15939	1241	ENSMUSG00000056708	Ier5	immediate early response 5	15064;15939;671336	48419;0;-14647	gene_body	chr1:155097913-155098395	Ier5	Tet
chr1	155097986	155098246	261	*	Promoter (1-2kb)	1	155096361	155099636	3276	2	15939	1390	ENSMUSG00000056708	Ier5	immediate early response 5	15064;15939;671336	48568;0;-14720	gene_body	chr1:155097986-155098246	Ier5	Tet
chr1	155098531	155098926	396	*	Promoter (<=1kb)	1	155096361	155099636	3276	2	15939	710	ENSMUSG00000056708	Ier5	immediate early response 5	15064;15939;671336	47888;0;-15265	gene_body	chr1:155098531-155098926	Ier5	Tet
chr1	155097978	155098194	217	*	Promoter (1-2kb)	1	155096361	155099636	3276	2	15939	1442	ENSMUSG00000056708	Ier5	immediate early response 5	15064;15939;671336	48620;0;-14712	gene_body	chr1:155097978-155098194	Ier5	Tet
chr1	155098563	155098793	231	*	Promoter (<=1kb)	1	155096361	155099636	3276	2	15939	843	ENSMUSG00000056708	Ier5	immediate early response 5	15064;15939;671336	48021;0;-15297	gene_body	chr1:155098563-155098793	Ier5	Tet
chr1	155098039	155098190	152	*	Promoter (1-2kb)	1	155096361	155099636	3276	2	15939	1446	ENSMUSG00000056708	Ier5	immediate early response 5	15064;15939;671336	48624;0;-14773	gene_body	chr1:155098039-155098190	Ier5	Tet
chr1	155098986	155099275	290	*	Promoter (<=1kb)	1	155096361	155099636	3276	2	15939	361	ENSMUSG00000056708	Ier5	immediate early response 5	15064;15939;671336	47539;0;-15720	gene_body	chr1:155098986-155099275	Ier5	Tet
chr1	155159296	155159459	164	*	Promoter (<=1kb)	1	155158715	155208256	49542	1	58244	581	ENSMUSG00000026470	Stx6	syntaxin 6	15064;58244	-12482;0	gene_body	chr1:155159296-155159459	Stx6	Tet
chr1	155163588	155163851	264	*	Intron (ENSMUST00000027743.12/58244, intron 1 of 7)	1	155158715	155208256	49542	1	58244	4873	ENSMUSG00000026470	Stx6	syntaxin 6	15064;207792;58244	-16774;0;0	gene_body	chr1:155163588-155163851	Stx6	Tet
chr1	155163611	155163762	152	*	Intron (ENSMUST00000027743.12/58244, intron 1 of 7)	1	155158715	155208256	49542	1	58244	4896	ENSMUSG00000026470	Stx6	syntaxin 6	15064;207792;58244	-16797;0;0	gene_body	chr1:155163611-155163762	Stx6	Tet
chr1	155167549	155167698	150	*	Intron (ENSMUST00000027743.12/58244, intron 1 of 7)	1	155158715	155208256	49542	1	58244	8834	ENSMUSG00000026470	Stx6	syntaxin 6	15064;207792;58244	-20735;0;0	gene_body	chr1:155167549-155167698	Stx6	Tet
chr1	155173430	155173962	533	*	Intron (ENSMUST00000027743.12/58244, intron 1 of 7)	1	155158715	155208256	49542	1	58244	14715	ENSMUSG00000026470	Stx6	syntaxin 6	15064;207792;58244	-26616;0;0	gene_body	chr1:155173430-155173962	Stx6	Tet
chr1	155173454	155173895	442	*	Intron (ENSMUST00000027743.12/58244, intron 1 of 7)	1	155158715	155208256	49542	1	58244	14739	ENSMUSG00000026470	Stx6	syntaxin 6	15064;207792;58244	-26640;0;0	gene_body	chr1:155173454-155173895	Stx6	Tet
chr1	155173088	155173260	173	*	Intron (ENSMUST00000027743.12/58244, intron 1 of 7)	1	155158715	155208256	49542	1	58244	14373	ENSMUSG00000026470	Stx6	syntaxin 6	15064;207792;58244	-26274;0;0	gene_body	chr1:155173088-155173260	Stx6	Tet
chr1	155173502	155173852	351	*	Intron (ENSMUST00000027743.12/58244, intron 1 of 7)	1	155158715	155208256	49542	1	58244	14787	ENSMUSG00000026470	Stx6	syntaxin 6	15064;207792;58244	-26688;0;0	gene_body	chr1:155173502-155173852	Stx6	Tet
chr1	155173662	155173834	173	*	Intron (ENSMUST00000027743.12/58244, intron 1 of 7)	1	155158715	155208256	49542	1	58244	14947	ENSMUSG00000026470	Stx6	syntaxin 6	15064;207792;58244	-26848;0;0	gene_body	chr1:155173662-155173834	Stx6	Tet
chr1	155201317	155201703	387	*	Intron (ENSMUST00000027743.12/58244, intron 7 of 7)	1	155158715	155208256	49542	1	58244	42602	ENSMUSG00000026470	Stx6	syntaxin 6	207792;58244	0;0	gene_body	chr1:155201317-155201703	Stx6	Tet
chr1	155201233	155201685	453	*	Intron (ENSMUST00000027743.12/58244, intron 7 of 7)	1	155158715	155208256	49542	1	58244	42518	ENSMUSG00000026470	Stx6	syntaxin 6	207792;58244	0;0	gene_body	chr1:155201233-155201685	Stx6	Tet
chr1	155201352	155201501	150	*	Intron (ENSMUST00000027743.12/58244, intron 7 of 7)	1	155158715	155208256	49542	1	58244	42637	ENSMUSG00000026470	Stx6	syntaxin 6	207792;58244	0;0	gene_body	chr1:155201352-155201501	Stx6	Tet
chr1	155224003	155224492	490	*	Intron (ENSMUST00000186156.6/207792, intron 5 of 9)	1	155212471	155244444	31974	2	207792	19952	ENSMUSG00000033722	BC034090	cDNA sequence BC034090	207792;58244	0;0	gene_body	chr1:155224003-155224492	BC034090	Tet
chr1	155224251	155224467	217	*	Intron (ENSMUST00000186156.6/207792, intron 5 of 9)	1	155212471	155244444	31974	2	207792	19977	ENSMUSG00000033722	BC034090	cDNA sequence BC034090	207792;58244	0;0	gene_body	chr1:155224251-155224467	BC034090	Tet
chr1	155224263	155224416	154	*	Intron (ENSMUST00000186156.6/207792, intron 5 of 9)	1	155212471	155244444	31974	2	207792	20028	ENSMUSG00000033722	BC034090	cDNA sequence BC034090	207792;58244	0;0	gene_body	chr1:155224263-155224416	BC034090	Tet
chr1	155416815	155417105	291	*	Promoter (<=1kb)	1	155275701	155417415	141715	2	19775	310	ENSMUSG00000026469	Xpr1	xenotropic and polytropic retrovirus receptor 1	19775	0	gene_body	chr1:155416815-155417105	Xpr1	Tet
chr1	155784841	155785035	195	*	Intron (ENSMUST00000035325.14/104009, intron 8 of 11)	1	155778158	155812889	34732	2	104009	27854	ENSMUSG00000033684	Qsox1	quiescin Q6 sulfhydryl oxidase 1	104009;16872	0;-33157	gene_body	chr1:155784841-155785035	Qsox1	Tet
chr1	156956288	156956750	463	*	Distal Intergenic	1	156804166	156939626	135461	2	78255	-16662	ENSMUSG00000026594	Ralgps2	Ral GEF with PH domain and SH3 binding motif 2	78255	-16662	Distal Intergenic	chr1:156956288-156956750	Ralgps2	Tet
chr1	156956361	156956756	396	*	Distal Intergenic	1	156804166	156939626	135461	2	78255	-16735	ENSMUSG00000026594	Ralgps2	Ral GEF with PH domain and SH3 binding motif 2	78255	-16735	Distal Intergenic	chr1:156956361-156956756	Ralgps2	Tet
chr1	156956339	156956709	371	*	Distal Intergenic	1	156804166	156939626	135461	2	78255	-16713	ENSMUSG00000026594	Ralgps2	Ral GEF with PH domain and SH3 binding motif 2	78255	-16713	Distal Intergenic	chr1:156956339-156956709	Ralgps2	Tet
chr1	156956369	156956700	332	*	Distal Intergenic	1	156804166	156939626	135461	2	78255	-16743	ENSMUSG00000026594	Ralgps2	Ral GEF with PH domain and SH3 binding motif 2	78255	-16743	Distal Intergenic	chr1:156956369-156956700	Ralgps2	Tet
chr1	159674240	159674544	305	*	Intron (ENSMUST00000192069.5/21960, intron 1 of 22)	1	159523769	159931729	407961	1	21960	150471	ENSMUSG00000015829	Tnr	tenascin R	21960	0	gene_body	chr1:159674240-159674544	Tnr	Tet
chr1	160024406	160024626	221	*	Distal Intergenic	1	160044384	160080208	35825	1	67647	-19758	ENSMUSG00000090394	4930523C07Rik	RIKEN cDNA 4930523C07 gene	67647	0	Distal Intergenic	chr1:160024406-160024626	4930523C07Rik	Tet
chr1	160053021	160053305	285	*	Intron (ENSMUST00000168250.7/67647, intron 1 of 3)	1	160044384	160080208	35825	1	67647	8637	ENSMUSG00000090394	4930523C07Rik	RIKEN cDNA 4930523C07 gene	329278;67647;75255	100275;0;24680	gene_body	chr1:160053021-160053305	4930523C07Rik	Tet
chr1	160053090	160053276	187	*	Intron (ENSMUST00000168250.7/67647, intron 1 of 3)	1	160044384	160080208	35825	1	67647	8706	ENSMUSG00000090394	4930523C07Rik	RIKEN cDNA 4930523C07 gene	329278;67647;75255	100304;0;24709	gene_body	chr1:160053090-160053276	4930523C07Rik	Tet
chr1	160053037	160053300	264	*	Intron (ENSMUST00000168250.7/67647, intron 1 of 3)	1	160044384	160080208	35825	1	67647	8653	ENSMUSG00000090394	4930523C07Rik	RIKEN cDNA 4930523C07 gene	329278;67647;75255	100280;0;24685	gene_body	chr1:160053037-160053300	4930523C07Rik	Tet
chr1	160053664	160053912	249	*	Intron (ENSMUST00000168250.7/67647, intron 1 of 3)	1	160044384	160080208	35825	1	67647	9280	ENSMUSG00000090394	4930523C07Rik	RIKEN cDNA 4930523C07 gene	329278;67647;75255	99668;0;24073	gene_body	chr1:160053664-160053912	4930523C07Rik	Tet
chr1	160054574	160054723	150	*	Intron (ENSMUST00000168250.7/67647, intron 1 of 3)	1	160044384	160080208	35825	1	67647	10190	ENSMUSG00000090394	4930523C07Rik	RIKEN cDNA 4930523C07 gene	329278;67647;75255	98857;0;23262	gene_body	chr1:160054574-160054723	4930523C07Rik	Tet
chr1	160053630	160053861	232	*	Intron (ENSMUST00000168250.7/67647, intron 1 of 3)	1	160044384	160080208	35825	1	67647	9246	ENSMUSG00000090394	4930523C07Rik	RIKEN cDNA 4930523C07 gene	329278;67647;75255	99719;0;24124	gene_body	chr1:160053630-160053861	4930523C07Rik	Tet
chr1	160244857	160245006	150	*	Intron (ENSMUST00000028052.11/29809, intron 4 of 8)	1	160202367	160212875	10509	2	12301	-31982	ENSMUSG00000014226	Cacybp	calcyclin binding protein	12301;29809;64659	-31982;0;49642	gene_body	chr1:160244857-160245006	Cacybp	Tet
chr1	160246084	160246263	180	*	Intron (ENSMUST00000028052.11/29809, intron 4 of 8)	1	160202367	160212875	10509	2	12301	-33209	ENSMUSG00000014226	Cacybp	calcyclin binding protein	100316784;12301;29809;64659	49709;-33209;0;50869	gene_body	chr1:160246084-160246263	Cacybp	Tet
chr1	160247000	160247153	154	*	Intron (ENSMUST00000028052.11/29809, intron 4 of 8)	1	160202367	160212875	10509	2	12301	-34125	ENSMUSG00000014226	Cacybp	calcyclin binding protein	100316784;12301;29809;64659	48819;-34125;0;51785	gene_body	chr1:160247000-160247153	Cacybp	Tet
chr1	160906725	160906989	265	*	Promoter (<=1kb)	1	160906418	160974978	68561	1	381305	307	ENSMUSG00000040423	Rc3h1	RING CCCH (C3H) domains 1	381305	0	gene_body	chr1:160906725-160906989	Rc3h1	Tet
chr1	161170763	161171030	268	*	Downstream (<1kb)	1	161154558	161159314	4757	2	100502590	-11449	ENSMUSG00000049160	Tex50	testis expressed 50	100502590;226541;73844	-11449;-39252;28072	gene_body	chr1:161170763-161171030	Tex50	Tet
chr1	161170753	161171017	265	*	Downstream (<1kb)	1	161154558	161159314	4757	2	100502590	-11439	ENSMUSG00000049160	Tex50	testis expressed 50	100502590;226541;73844	-11439;-39242;28062	gene_body	chr1:161170753-161171017	Tex50	Tet
chr1	161378646	161378815	170	*	Distal Intergenic	1	161395409	161418410	23002	1	22164	-16594	ENSMUSG00000026700	Tnfsf4	tumor necrosis factor (ligand) superfamily, member 4	22164	-16594	Distal Intergenic	chr1:161378646-161378815	Tnfsf4	Tet
chr1	161670888	161671284	397	*	Distal Intergenic	1	161780689	161788495	7807	2	14103	117211	ENSMUSG00000000817	Fasl	Fas ligand (TNF superfamily, member 6)			Distal Intergenic	chr1:161670888-161671284	Fasl	Tet
chr1	161670911	161671249	339	*	Distal Intergenic	1	161780689	161788495	7807	2	14103	117246	ENSMUSG00000000817	Fasl	Fas ligand (TNF superfamily, member 6)			Distal Intergenic	chr1:161670911-161671249	Fasl	Tet
chr1	161671020	161671189	170	*	Distal Intergenic	1	161780689	161788495	7807	2	14103	117306	ENSMUSG00000000817	Fasl	Fas ligand (TNF superfamily, member 6)			Distal Intergenic	chr1:161671020-161671189	Fasl	Tet
chr1	161670992	161671224	233	*	Distal Intergenic	1	161780689	161788495	7807	2	14103	117271	ENSMUSG00000000817	Fasl	Fas ligand (TNF superfamily, member 6)			Distal Intergenic	chr1:161670992-161671224	Fasl	Tet
chr1	161734245	161735056	812	*	Distal Intergenic	1	161780689	161788495	7807	2	14103	53439	ENSMUSG00000000817	Fasl	Fas ligand (TNF superfamily, member 6)	14103	53439	Distal Intergenic	chr1:161734245-161735056	Fasl	Tet
chr1	161750630	161751001	372	*	Distal Intergenic	1	161780689	161788495	7807	2	14103	37494	ENSMUSG00000000817	Fasl	Fas ligand (TNF superfamily, member 6)	14103	37494	Distal Intergenic	chr1:161750630-161751001	Fasl	Tet
chr1	161750615	161750873	259	*	Distal Intergenic	1	161780689	161788495	7807	2	14103	37622	ENSMUSG00000000817	Fasl	Fas ligand (TNF superfamily, member 6)	14103	37622	Distal Intergenic	chr1:161750615-161750873	Fasl	Tet
chr1	161761510	161761899	390	*	Distal Intergenic	1	161780689	161788495	7807	2	14103	26596	ENSMUSG00000000817	Fasl	Fas ligand (TNF superfamily, member 6)	14103	26596	Distal Intergenic	chr1:161761510-161761899	Fasl	Tet
chr1	161761472	161761868	397	*	Distal Intergenic	1	161780689	161788495	7807	2	14103	26627	ENSMUSG00000000817	Fasl	Fas ligand (TNF superfamily, member 6)	14103	26627	Distal Intergenic	chr1:161761472-161761868	Fasl	Tet
chr1	161765930	161766253	324	*	Distal Intergenic	1	161780689	161788495	7807	2	14103	22242	ENSMUSG00000000817	Fasl	Fas ligand (TNF superfamily, member 6)	14103;226551	22242;0	Distal Intergenic	chr1:161765930-161766253	Fasl	Tet
chr1	161766595	161767477	883	*	Distal Intergenic	1	161780689	161788495	7807	2	14103	21018	ENSMUSG00000000817	Fasl	Fas ligand (TNF superfamily, member 6)	14103;226551	21018;0	Distal Intergenic	chr1:161766595-161767477	Fasl	Tet
chr1	161766053	161766214	162	*	Distal Intergenic	1	161780689	161788495	7807	2	14103	22281	ENSMUSG00000000817	Fasl	Fas ligand (TNF superfamily, member 6)	14103;226551	22281;0	Distal Intergenic	chr1:161766053-161766214	Fasl	Tet
chr1	161766613	161766962	350	*	Distal Intergenic	1	161780689	161788495	7807	2	14103	21533	ENSMUSG00000000817	Fasl	Fas ligand (TNF superfamily, member 6)	14103;226551	21533;0	Distal Intergenic	chr1:161766613-161766962	Fasl	Tet
chr1	161766017	161766204	188	*	Distal Intergenic	1	161780689	161788495	7807	2	14103	22291	ENSMUSG00000000817	Fasl	Fas ligand (TNF superfamily, member 6)	14103;226551	22291;0	Distal Intergenic	chr1:161766017-161766204	Fasl	Tet
chr1	161766664	161766977	314	*	Distal Intergenic	1	161780689	161788495	7807	2	14103	21518	ENSMUSG00000000817	Fasl	Fas ligand (TNF superfamily, member 6)	14103;226551	21518;0	Distal Intergenic	chr1:161766664-161766977	Fasl	Tet
chr1	161767194	161767379	186	*	Distal Intergenic	1	161780689	161788495	7807	2	14103	21116	ENSMUSG00000000817	Fasl	Fas ligand (TNF superfamily, member 6)	14103;226551	21116;0	Distal Intergenic	chr1:161767194-161767379	Fasl	Tet
chr1	161766674	161766967	294	*	Distal Intergenic	1	161780689	161788495	7807	2	14103	21528	ENSMUSG00000000817	Fasl	Fas ligand (TNF superfamily, member 6)	14103;226551	21528;0	Distal Intergenic	chr1:161766674-161766967	Fasl	Tet
chr1	161775246	161775475	230	*	Distal Intergenic	1	161780689	161788495	7807	2	14103	13020	ENSMUSG00000000817	Fasl	Fas ligand (TNF superfamily, member 6)	14103;226551	13020;0	Distal Intergenic	chr1:161775246-161775475	Fasl	Tet
chr1	161804547	161805176	630	*	Distal Intergenic	1	161780689	161788495	7807	2	14103	-16052	ENSMUSG00000000817	Fasl	Fas ligand (TNF superfamily, member 6)	14103;226551	-16052;0	Distal Intergenic	chr1:161804547-161805176	Fasl	Tet
chr1	161804509	161804985	477	*	Distal Intergenic	1	161780689	161788495	7807	2	14103	-16014	ENSMUSG00000000817	Fasl	Fas ligand (TNF superfamily, member 6)	14103;226551	-16014;0	Distal Intergenic	chr1:161804509-161804985	Fasl	Tet
chr1	161804581	161804953	373	*	Distal Intergenic	1	161780689	161788495	7807	2	14103	-16086	ENSMUSG00000000817	Fasl	Fas ligand (TNF superfamily, member 6)	14103;226551	-16086;0	Distal Intergenic	chr1:161804581-161804953	Fasl	Tet
chr1	161804557	161804706	150	*	Distal Intergenic	1	161780689	161788495	7807	2	14103	-16062	ENSMUSG00000000817	Fasl	Fas ligand (TNF superfamily, member 6)	14103;226551	-16062;0	Distal Intergenic	chr1:161804557-161804706	Fasl	Tet
chr1	161876298	161876447	150	*	Promoter (<=1kb)	1	161816114	161876682	60569	2	226551	235	ENSMUSG00000040297	Suco	SUN domain containing ossification factor	226551	0	gene_body	chr1:161876298-161876447	Suco	Tet
chr1	162207275	162207497	223	*	Intron (ENSMUST00000159763.7/103967, intron 3 of 8)	1	162217623	162225550	7928	1	474332	-10126	ENSMUSG00000078190	Dnm3os	dynamin 3, opposite strand	103967;387210;474332;723821	0;-15871;-10126;-10317	gene_body	chr1:162207275-162207497	Dnm3os	Tet
chr1	162207253	162207451	199	*	Intron (ENSMUST00000159763.7/103967, intron 3 of 8)	1	162217623	162225550	7928	1	474332	-10172	ENSMUSG00000078190	Dnm3os	dynamin 3, opposite strand	103967;387210;474332;723821	0;-15917;-10172;-10363	gene_body	chr1:162207253-162207451	Dnm3os	Tet
chr1	162728018	162728380	363	*	Intron (ENSMUST00000182149.7/226562, intron 1 of 34)	1	162670725	162740556	69832	2	226562	12176	ENSMUSG00000040225	Prrc2c	proline-rich coiled-coil 2C	226562	0	gene_body	chr1:162728018-162728380	Prrc2c	Tet
chr1	162728104	162728325	222	*	Intron (ENSMUST00000182149.7/226562, intron 1 of 34)	1	162670725	162740556	69832	2	226562	12231	ENSMUSG00000040225	Prrc2c	proline-rich coiled-coil 2C	226562	0	gene_body	chr1:162728104-162728325	Prrc2c	Tet
chr1	162728035	162728262	228	*	Intron (ENSMUST00000182149.7/226562, intron 1 of 34)	1	162670725	162740556	69832	2	226562	12294	ENSMUSG00000040225	Prrc2c	proline-rich coiled-coil 2C	226562	0	gene_body	chr1:162728035-162728262	Prrc2c	Tet
chr1	162728013	162728316	304	*	Intron (ENSMUST00000182149.7/226562, intron 1 of 34)	1	162670725	162740556	69832	2	226562	12240	ENSMUSG00000040225	Prrc2c	proline-rich coiled-coil 2C	226562	0	gene_body	chr1:162728013-162728316	Prrc2c	Tet
chr1	162739881	162740136	256	*	Promoter (<=1kb)	1	162670725	162740556	69832	2	226562	420	ENSMUSG00000040225	Prrc2c	proline-rich coiled-coil 2C	226562	0	gene_body	chr1:162739881-162740136	Prrc2c	Tet
chr1	162773771	162773920	150	*	Distal Intergenic	1	162670725	162740556	69832	2	226562	-33215	ENSMUSG00000040225	Prrc2c	proline-rich coiled-coil 2C	226562;226564	0;40052	Distal Intergenic	chr1:162773771-162773920	Prrc2c	Tet
chr1	163930033	163930239	207	*	Promoter (<=1kb)	1	163929100	163955126	26027	1	240880	933	ENSMUSG00000026584	Scyl3	SCY1-like 3 (S. cerevisiae)	16579;240880;381306	150450;0;64557	gene_body	chr1:163930033-163930239	Scyl3	Tet
chr1	164073833	164074026	194	*	Intron (ENSMUST00000192047.5/20343, intron 6 of 7)	1	164061982	164084181	22200	1	20343	11851	ENSMUSG00000026581	Sell	selectin, lymphocyte	20339;20343;20344	25599;0;0	gene_body	chr1:164073833-164074026	Sell	Tet
chr1	164135416	164135732	317	*	Intron (ENSMUST00000162746.1/20344, intron 8 of 15)	1	164151838	164220277	68440	1	14067	-16106	ENSMUSG00000026579	F5	coagulation factor V	100503816;14067;20344	16485;-16106;0	gene_body	chr1:164135416-164135732	F5	Tet
chr1	164135962	164136328	367	*	Intron (ENSMUST00000162746.1/20344, intron 8 of 15)	1	164151838	164220277	68440	1	14067	-15510	ENSMUSG00000026579	F5	coagulation factor V	100503816;14067;20344	15889;-15510;0	gene_body	chr1:164135962-164136328	F5	Tet
chr1	164135434	164135583	150	*	Intron (ENSMUST00000162746.1/20344, intron 8 of 15)	1	164151838	164220277	68440	1	14067	-16255	ENSMUSG00000026579	F5	coagulation factor V	100503816;14067;20344	16634;-16255;0	gene_body	chr1:164135434-164135583	F5	Tet
chr1	164136044	164136239	196	*	Intron (ENSMUST00000162746.1/20344, intron 8 of 15)	1	164151838	164220277	68440	1	14067	-15599	ENSMUSG00000026579	F5	coagulation factor V	100503816;14067;20344	15978;-15599;0	gene_body	chr1:164136044-164136239	F5	Tet
chr1	164135537	164135686	150	*	Intron (ENSMUST00000162746.1/20344, intron 8 of 15)	1	164151838	164220277	68440	1	14067	-16152	ENSMUSG00000026579	F5	coagulation factor V	100503816;14067;20344	16531;-16152;0	gene_body	chr1:164135537-164135686	F5	Tet
chr1	164136060	164136248	189	*	Intron (ENSMUST00000162746.1/20344, intron 8 of 15)	1	164151838	164220277	68440	1	14067	-15590	ENSMUSG00000026579	F5	coagulation factor V	100503816;14067;20344	15969;-15590;0	gene_body	chr1:164136060-164136248	F5	Tet
chr1	164224605	164224754	150	*	Distal Intergenic	1	164249046	164265385	16340	1	116914	-24292	ENSMUSG00000040918	Slc19a2	solute carrier family 19 (thiamine transporter), member 2	116914;14067	-24292;72767	Distal Intergenic	chr1:164224605-164224754	Slc19a2	Tet
chr1	164394672	164394821	150	*	Intron (ENSMUST00000193808.5/171567, intron 13 of 15)	1	164437109	164458355	21247	2	11931	63534	ENSMUSG00000026576	Atp1b1	ATPase, Na+/K+ transporting, beta 1 polypeptide	11931;171567	63534;0	gene_body	chr1:164394672-164394821	Atp1b1	Tet
chr1	164898840	164899291	452	*	Intron (ENSMUST00000194322.1/433374, intron 2 of 3)	1	164863133	164936775	73643	1	433374	35707	ENSMUSG00000104117	Gm20743	predicted gene, 20743	16963;433374	36236;0	gene_body	chr1:164898840-164899291	Gm20743	Tet
chr1	164899046	164899289	244	*	Intron (ENSMUST00000194322.1/433374, intron 2 of 3)	1	164863133	164936775	73643	1	433374	35913	ENSMUSG00000104117	Gm20743	predicted gene, 20743	16963;433374	36238;0	gene_body	chr1:164899046-164899289	Gm20743	Tet
chr1	164899039	164899248	210	*	Intron (ENSMUST00000194322.1/433374, intron 2 of 3)	1	164863133	164936775	73643	1	433374	35906	ENSMUSG00000104117	Gm20743	predicted gene, 20743	16963;433374	36279;0	gene_body	chr1:164899039-164899248	Gm20743	Tet
chr1	164898955	164899104	150	*	Intron (ENSMUST00000194322.1/433374, intron 2 of 3)	1	164863133	164936775	73643	1	433374	35822	ENSMUSG00000104117	Gm20743	predicted gene, 20743	16963;433374	36423;0	gene_body	chr1:164898955-164899104	Gm20743	Tet
chr1	164966074	164966614	541	*	Distal Intergenic	1	164931644	164935527	3884	2	16963	-30547	ENSMUSG00000026573	Xcl1	chemokine (C motif) ligand 1	16963;433374	-30547;0	Distal Intergenic	chr1:164966074-164966614	Xcl1	Tet
chr1	164966126	164966477	352	*	Distal Intergenic	1	164931644	164935527	3884	2	16963	-30599	ENSMUSG00000026573	Xcl1	chemokine (C motif) ligand 1	16963;433374	-30599;0	Distal Intergenic	chr1:164966126-164966477	Xcl1	Tet
chr1	164966126	164966382	257	*	Distal Intergenic	1	164931644	164935527	3884	2	16963	-30599	ENSMUSG00000026573	Xcl1	chemokine (C motif) ligand 1	16963;433374	-30599;0	Distal Intergenic	chr1:164966126-164966382	Xcl1	Tet
chr1	164972869	164973095	227	*	Distal Intergenic	1	164931644	164935527	3884	2	16963	-37342	ENSMUSG00000026573	Xcl1	chemokine (C motif) ligand 1	16963;433374	-37342;0	Distal Intergenic	chr1:164972869-164973095	Xcl1	Tet
chr1	164975859	164976143	285	*	Distal Intergenic	1	164931644	164935527	3884	2	16963	-40332	ENSMUSG00000026573	Xcl1	chemokine (C motif) ligand 1	16963;433374	-40332;0	Distal Intergenic	chr1:164975859-164976143	Xcl1	Tet
chr1	165641522	165641671	150	*	Distal Intergenic	1	165592240	165634538	42299	2	68481	-6984	ENSMUSG00000026566	Mpzl1	myelin protein zero-like 1	226594;68481	0;-6984	Distal Intergenic	chr1:165641522-165641671	Mpzl1	Tet
chr1	165642317	165642677	361	*	Distal Intergenic	1	165592240	165634538	42299	2	68481	-7779	ENSMUSG00000026566	Mpzl1	myelin protein zero-like 1	226594;68481	0;-7779	Distal Intergenic	chr1:165642317-165642677	Mpzl1	Tet
chr1	165642397	165642603	207	*	Distal Intergenic	1	165592240	165634538	42299	2	68481	-7859	ENSMUSG00000026566	Mpzl1	myelin protein zero-like 1	226594;68481	0;-7859	Distal Intergenic	chr1:165642397-165642603	Mpzl1	Tet
chr1	165642367	165642660	294	*	Distal Intergenic	1	165592240	165634538	42299	2	68481	-7829	ENSMUSG00000026566	Mpzl1	myelin protein zero-like 1	226594;68481	0;-7829	Distal Intergenic	chr1:165642367-165642660	Mpzl1	Tet
chr1	165642339	165642552	214	*	Distal Intergenic	1	165592240	165634538	42299	2	68481	-7801	ENSMUSG00000026566	Mpzl1	myelin protein zero-like 1	226594;68481	0;-7801	Distal Intergenic	chr1:165642339-165642552	Mpzl1	Tet
chr1	165682563	165682740	178	*	Intron (ENSMUST00000097474.8/226594, intron 1 of 5)	1	165646516	165709393	62878	2	226594	26653	ENSMUSG00000040723	Rcsd1	RCSD domain containing 1	226594;68481	0;-48025	gene_body	chr1:165682563-165682740	Rcsd1	Tet
chr1	165689561	165689780	220	*	Intron (ENSMUST00000097474.8/226594, intron 1 of 5)	1	165646516	165709393	62878	2	226594	19613	ENSMUSG00000040723	Rcsd1	RCSD domain containing 1	226594	0	gene_body	chr1:165689561-165689780	Rcsd1	Tet
chr1	165691614	165691850	237	*	Intron (ENSMUST00000097474.8/226594, intron 1 of 5)	1	165646516	165709393	62878	2	226594	17543	ENSMUSG00000040723	Rcsd1	RCSD domain containing 1	226594	0	gene_body	chr1:165691614-165691850	Rcsd1	Tet
chr1	165700507	165701339	833	*	Intron (ENSMUST00000097474.8/226594, intron 1 of 5)	1	165646516	165709393	62878	2	226594	8054	ENSMUSG00000040723	Rcsd1	RCSD domain containing 1	226594	0	gene_body	chr1:165700507-165701339	Rcsd1	Tet
chr1	165700575	165700727	153	*	Intron (ENSMUST00000097474.8/226594, intron 1 of 5)	1	165646516	165709393	62878	2	226594	8666	ENSMUSG00000040723	Rcsd1	RCSD domain containing 1	226594	0	gene_body	chr1:165700575-165700727	Rcsd1	Tet
chr1	165700991	165701233	243	*	Intron (ENSMUST00000097474.8/226594, intron 1 of 5)	1	165646516	165709393	62878	2	226594	8160	ENSMUSG00000040723	Rcsd1	RCSD domain containing 1	226594	0	gene_body	chr1:165700991-165701233	Rcsd1	Tet
chr1	165700630	165700814	185	*	Intron (ENSMUST00000097474.8/226594, intron 1 of 5)	1	165646516	165709393	62878	2	226594	8579	ENSMUSG00000040723	Rcsd1	RCSD domain containing 1	226594	0	gene_body	chr1:165700630-165700814	Rcsd1	Tet
chr1	165706072	165706253	182	*	Exon (ENSMUST00000192566.1/ENSMUST00000192566.1, exon 1 of 1)	1	165646516	165709393	62878	2	226594	3140	ENSMUSG00000040723	Rcsd1	RCSD domain containing 1	226594	0	gene_body	chr1:165706072-165706253	Rcsd1	Tet
chr1	165717758	165717979	222	*	Distal Intergenic	1	165646516	165709393	62878	2	226594	-8365	ENSMUSG00000040723	Rcsd1	RCSD domain containing 1	226594;433375	0;0	Distal Intergenic	chr1:165717758-165717979	Rcsd1	Tet
chr1	165718387	165718610	224	*	Distal Intergenic	1	165646516	165709393	62878	2	226594	-8994	ENSMUSG00000040723	Rcsd1	RCSD domain containing 1	226594;433375	0;0	Distal Intergenic	chr1:165718387-165718610	Rcsd1	Tet
chr1	165722552	165723060	509	*	Exon (ENSMUST00000192469.1/ENSMUST00000192469.1, exon 1 of 1)	1	165646516	165709393	62878	2	226594	-13159	ENSMUSG00000040723	Rcsd1	RCSD domain containing 1	226594;433375	0;0	gene_body	chr1:165722552-165723060	Rcsd1	Tet
chr1	165764099	165764256	158	*	Promoter (<=1kb)	1	165763746	165775308	11563	1	433375	353	ENSMUSG00000040713	Creg1	cellular repressor of E1A-stimulated genes 1	12503;433375	0;0	gene_body	chr1:165764099-165764256	Creg1	Tet
chr1	165789172	165789338	167	*	Promoter (<=1kb)	1	165788681	165877277	88597	1	12503	491	ENSMUSG00000005763	Cd247	CD247 antigen	12503;433375	0;0	gene_body	chr1:165789172-165789338	Cd247	Tet
chr1	165789956	165790228	273	*	Promoter (1-2kb)	1	165788681	165877277	88597	1	12503	1275	ENSMUSG00000005763	Cd247	CD247 antigen	12503;433375	0;0	gene_body	chr1:165789956-165790228	Cd247	Tet
chr1	165789439	165789621	183	*	Promoter (<=1kb)	1	165788681	165877277	88597	1	12503	758	ENSMUSG00000005763	Cd247	CD247 antigen	12503;433375	0;0	gene_body	chr1:165789439-165789621	Cd247	Tet
chr1	165790052	165790345	294	*	Promoter (1-2kb)	1	165788681	165877277	88597	1	12503	1371	ENSMUSG00000005763	Cd247	CD247 antigen	12503;433375	0;0	gene_body	chr1:165790052-165790345	Cd247	Tet
chr1	165801794	165802019	226	*	Intron (ENSMUST00000161971.7/12503, intron 1 of 7)	1	165788681	165877277	88597	1	12503	13113	ENSMUSG00000005763	Cd247	CD247 antigen	12503;433375	0;0	gene_body	chr1:165801794-165802019	Cd247	Tet
chr1	165803312	165803678	367	*	Intron (ENSMUST00000161971.7/12503, intron 1 of 7)	1	165788681	165877277	88597	1	12503	14631	ENSMUSG00000005763	Cd247	CD247 antigen	12503;433375	0;0	gene_body	chr1:165803312-165803678	Cd247	Tet
chr1	165816431	165816699	269	*	Intron (ENSMUST00000161971.7/12503, intron 1 of 7)	1	165788681	165877277	88597	1	12503	27750	ENSMUSG00000005763	Cd247	CD247 antigen	12503;18986;433375	0;185979;0	gene_body	chr1:165816431-165816699	Cd247	Tet
chr1	165837595	165838255	661	*	Intron (ENSMUST00000161971.7/12503, intron 1 of 7)	1	165788681	165877277	88597	1	12503	48914	ENSMUSG00000005763	Cd247	CD247 antigen	12503;18986	0;164423	gene_body	chr1:165837595-165838255	Cd247	Tet
chr1	165840853	165841162	310	*	Intron (ENSMUST00000161971.7/12503, intron 1 of 7)	1	165788681	165877277	88597	1	12503	52172	ENSMUSG00000005763	Cd247	CD247 antigen	12503;18986	0;161516	gene_body	chr1:165840853-165841162	Cd247	Tet
chr1	165840879	165841099	221	*	Intron (ENSMUST00000161971.7/12503, intron 1 of 7)	1	165788681	165877277	88597	1	12503	52198	ENSMUSG00000005763	Cd247	CD247 antigen	12503;18986	0;161579	gene_body	chr1:165840879-165841099	Cd247	Tet
chr1	166379976	166380255	280	*	Promoter (<=1kb)	1	166379097	166393621	14525	1	27878	879	ENSMUSG00000026563	Tada1	transcriptional adaptor 1	27878;71592	0;29608	gene_body	chr1:166379976-166380255	Tada1	Tet
chr1	166379893	166380042	150	*	Promoter (<=1kb)	1	166379097	166393621	14525	1	27878	796	ENSMUSG00000026563	Tada1	transcriptional adaptor 1	27878;71592	0;29821	gene_body	chr1:166379893-166380042	Tada1	Tet
chr1	166379575	166379772	198	*	Promoter (<=1kb)	1	166379097	166393621	14525	1	27878	478	ENSMUSG00000026563	Tada1	transcriptional adaptor 1	27878;71592	0;30091	gene_body	chr1:166379575-166379772	Tada1	Tet
chr1	169517627	169518189	563	*	Intron (ENSMUST00000111368.7/66977, intron 5 of 13)	1	169497934	169531464	33531	2	66977	13275	ENSMUSG00000026683	Nuf2	NUF2, NDC80 kinetochore complex component	66977	0	gene_body	chr1:169517627-169518189	Nuf2	Tet
chr1	169517620	169517903	284	*	Intron (ENSMUST00000111368.7/66977, intron 5 of 13)	1	169497934	169531464	33531	2	66977	13561	ENSMUSG00000026683	Nuf2	NUF2, NDC80 kinetochore complex component	66977	0	gene_body	chr1:169517620-169517903	Nuf2	Tet
chr1	171033928	171034077	150	*	Distal Intergenic	1	171018920	171029761	10842	1	246256	15008	ENSMUSG00000059089	Fcgr4	Fc receptor, IgG, low affinity IV	102466998;14131;246256	30575;30858;15008	Distal Intergenic	chr1:171033928-171034077	Fcgr4	Tet
chr1	171044482	171044794	313	*	Distal Intergenic	1	171064591	171064652	62	2	102466998	19858	ENSMUSG00000118979	Mir6546	microRNA 6546	102466998;14131;246256	19858;20141;25562	Distal Intergenic	chr1:171044482-171044794	Mir6546	Tet
chr1	171101809	171102405	597	*	Distal Intergenic	1	171113918	171126967	13050	1	75472	-11513	ENSMUSG00000026649	Cfap126	cilia and flagella associated protein 126	102466998;14131;17528;66052;75472	-37157;-36874;-48306;48198;-11513	Distal Intergenic	chr1:171101809-171102405	Cfap126	Tet
chr1	171102781	171102930	150	*	Distal Intergenic	1	171113918	171126967	13050	1	75472	-10988	ENSMUSG00000026649	Cfap126	cilia and flagella associated protein 126	102466998;14131;17528;66052;75472	-38129;-37846;-47781;47673;-10988	Distal Intergenic	chr1:171102781-171102930	Cfap126	Tet
chr1	171101962	171102126	165	*	Distal Intergenic	1	171113918	171126967	13050	1	75472	-11792	ENSMUSG00000026649	Cfap126	cilia and flagella associated protein 126	102466998;14131;17528;66052;75472	-37310;-37027;-48585;48477;-11792	Distal Intergenic	chr1:171101962-171102126	Cfap126	Tet
chr1	171111067	171111463	397	*	Distal Intergenic	1	171113918	171126967	13050	1	75472	-2455	ENSMUSG00000026649	Cfap126	cilia and flagella associated protein 126	102466998;14131;17528;66052;75472	-46415;-46132;-39248;39140;-2455	Distal Intergenic	chr1:171111067-171111463	Cfap126	Tet
chr1	171111098	171111309	212	*	Distal Intergenic	1	171113918	171126967	13050	1	75472	-2609	ENSMUSG00000026649	Cfap126	cilia and flagella associated protein 126	102466998;14131;17528;66052;75472	-46446;-46163;-39402;39294;-2609	Distal Intergenic	chr1:171111098-171111309	Cfap126	Tet
chr1	171390167	171390470	304	*	Promoter (1-2kb)	1	171388954	171410298	21345	1	226652	1213	ENSMUSG00000048865	Arhgap30	Rho GTPase activating protein 30	16456;18637;21945;22278;226652;226654;27045;68874;71740	-47065;44497;61022;0;0;-28402;-44521;-29369;20068	gene_body	chr1:171390167-171390470	Arhgap30	Tet
chr1	171390190	171390458	269	*	Promoter (1-2kb)	1	171388954	171410298	21345	1	226652	1236	ENSMUSG00000048865	Arhgap30	Rho GTPase activating protein 30	16456;18637;21945;22278;226652;226654;27045;68874;71740	-47077;44520;61045;0;0;-28414;-44544;-29392;20091	gene_body	chr1:171390190-171390458	Arhgap30	Tet
chr1	171390256	171390430	175	*	Promoter (1-2kb)	1	171388954	171410298	21345	1	226652	1302	ENSMUSG00000048865	Arhgap30	Rho GTPase activating protein 30	16456;18637;21945;22278;226652;226654;27045;68874;71740	-47105;44586;61111;0;0;-28442;-44610;-29458;20157	gene_body	chr1:171390256-171390430	Arhgap30	Tet
chr1	171411927	171412197	271	*	Promoter (<=1kb)	1	171411313	171419142	7830	1	22278	614	ENSMUSG00000026641	Usf1	upstream transcription factor 1	16456;22278;226652;226654;71740	-25338;0;0;-6675;41828	gene_body	chr1:171411927-171412197	Usf1	Tet
chr1	171551522	171551715	194	*	Distal Intergenic	1	171559193	171609746	50554	1	18106	-7478	ENSMUSG00000004709	Cd244a	CD244 molecule A	16429;17085;18106;56009	-16228;55695;-7478;48044	Distal Intergenic	chr1:171551522-171551715	Cd244a	Tet
chr1	171685028	171685223	196	*	Intron (ENSMUST00000015499.13/12506, intron 1 of 2)	1	171682009	171705258	23250	1	12506	3019	ENSMUSG00000015355	Cd48	CD48 antigen	102465784;12506;75345	-43128;0;-31993	gene_body	chr1:171685028-171685223	Cd48	Tet
chr1	171782557	171782836	280	*	Intron (ENSMUST00000015460.4/27218, intron 3 of 6)	1	171767127	171801184	34058	1	27218	15430	ENSMUSG00000015316	Slamf1	signaling lymphocytic activation molecule family member 1	27218	0	gene_body	chr1:171782557-171782836	Slamf1	Tet
chr1	171782526	171782887	362	*	Intron (ENSMUST00000015460.4/27218, intron 3 of 6)	1	171767127	171801184	34058	1	27218	15399	ENSMUSG00000015316	Slamf1	signaling lymphocytic activation molecule family member 1	27218	0	gene_body	chr1:171782526-171782887	Slamf1	Tet
chr1	171845122	171845790	669	*	Intron (ENSMUST00000155802.7/12523, intron 2 of 8)	1	171839697	171890718	51022	1	12523	5425	ENSMUSG00000038147	Cd84	CD84 antigen	12523;27218	0;0	gene_body	chr1:171845122-171845790	Cd84	Tet
chr1	171845356	171845526	171	*	Intron (ENSMUST00000155802.7/12523, intron 2 of 8)	1	171839697	171890718	51022	1	12523	5659	ENSMUSG00000038147	Cd84	CD84 antigen	12523;27218	0;0	gene_body	chr1:171845356-171845526	Cd84	Tet
chr1	171845589	171845768	180	*	Intron (ENSMUST00000155802.7/12523, intron 2 of 8)	1	171839697	171890718	51022	1	12523	5892	ENSMUSG00000038147	Cd84	CD84 antigen	12523;27218	0;0	gene_body	chr1:171845589-171845768	Cd84	Tet
chr1	171966165	171966329	165	*	Distal Intergenic	1	171909957	171919356	9400	2	105244010	-46809	ENSMUSG00000104413	Gm37065	predicted gene, 37065	105244010;30925;93840	-46809;48650;62115	Distal Intergenic	chr1:171966165-171966329	Gm37065	Tet
chr1	171975467	171976231	765	*	Distal Intergenic	1	172000960	172028444	27485	2	93840	52213	ENSMUSG00000026556	Vangl2	VANGL planar cell polarity 2	30925;93840	57952;52213	Distal Intergenic	chr1:171975467-171976231	Vangl2	Tet
chr1	172000678	172000896	219	*	Distal Intergenic	1	172000960	172028444	27485	2	93840	27548	ENSMUSG00000026556	Vangl2	VANGL planar cell polarity 2	30925;93840	83163;27548	Distal Intergenic	chr1:172000678-172000896	Vangl2	Tet
chr1	172000741	172000890	150	*	Distal Intergenic	1	172000960	172028444	27485	2	93840	27554	ENSMUSG00000026556	Vangl2	VANGL planar cell polarity 2	30925;93840	83226;27554	Distal Intergenic	chr1:172000741-172000890	Vangl2	Tet
chr1	172326219	172326460	242	*	Exon (ENSMUST00000062387.7/16524, exon 3 of 4)	1	172320501	172329318	8818	2	16524	2858	ENSMUSG00000038026	Kcnj9	potassium inwardly-rectifying channel, subfamily J, member 9	140559;16513;16524;98660	64578;-14750;0;-28155	gene_body	chr1:172326219-172326460	Kcnj9	Tet
chr1	172376747	172376896	150	*	Promoter (<=1kb)	1	172376546	172384099	7554	1	67556	201	ENSMUSG00000050229	Pigm	phosphatidylinositol glycan anchor biosynthesis, class M	16513;16524;67556	35537;0;0	gene_body	chr1:172376747-172376896	Pigm	Tet
chr1	172376838	172377088	251	*	Promoter (<=1kb)	1	172376546	172384099	7554	1	67556	292	ENSMUSG00000050229	Pigm	phosphatidylinositol glycan anchor biosynthesis, class M	16513;16524;67556	35628;0;0	gene_body	chr1:172376838-172377088	Pigm	Tet
chr1	172501740	172502038	299	*	Promoter (1-2kb)	1	172500047	172507380	7334	1	21346	1693	ENSMUSG00000026547	Tagln2	transgelin 2	21346;71319;71870;93842;98365	0;0;-19006;19952;26382	gene_body	chr1:172501740-172502038	Tagln2	Tet
chr1	172513982	172514196	215	*	Exon (ENSMUST00000195877.1/ENSMUST00000195877.1, exon 1 of 1)	1	172521044	172545870	24827	1	71870	-6848	ENSMUSG00000026546	Cfap45	cilia and flagella associated protein 45	21346;240916;71319;71870;93842;98365	0;0;0;-6848;32194;38624	gene_body	chr1:172513982-172514196	Cfap45	Tet
chr1	172514003	172514171	169	*	Exon (ENSMUST00000195877.1/ENSMUST00000195877.1, exon 1 of 1)	1	172521044	172545870	24827	1	71870	-6873	ENSMUSG00000026546	Cfap45	cilia and flagella associated protein 45	21346;240916;71319;71870;93842;98365	0;0;0;-6873;32215;38645	gene_body	chr1:172514003-172514171	Cfap45	Tet
chr1	172548540	172548779	240	*	Intron (ENSMUST00000132370.8/71319, intron 1 of 2)	1	172538133	172550806	12674	2	71319	2027	ENSMUSG00000085184	4933439K11Rik	RIKEN cDNA 4933439K11 gene	21346;240916;677296;71319;71870;74748;93842	0;0;53772;0;27496;41789;66752	gene_body	chr1:172548540-172548779	4933439K11Rik	Tet
chr1	172563001	172563503	503	*	3' UTR	1	172555938	172563717	7780	1	240916	7063	ENSMUSG00000049598	Vsig8	V-set and immunoglobulin domain containing 8	240916;677296;71319;71870;74748	0;39048;0;41957;27065	gene_body	chr1:172563001-172563503	Vsig8	Tet
chr1	172563109	172563444	336	*	3' UTR	1	172555938	172563717	7780	1	240916	7171	ENSMUSG00000049598	Vsig8	V-set and immunoglobulin domain containing 8	240916;677296;71319;71870;74748	0;39107;0;42065;27124	gene_body	chr1:172563109-172563444	Vsig8	Tet
chr1	172562890	172563314	425	*	3' UTR	1	172555938	172563717	7780	1	240916	6952	ENSMUSG00000049598	Vsig8	V-set and immunoglobulin domain containing 8	240916;677296;71319;71870;74748	0;39237;0;41846;27254	gene_body	chr1:172562890-172563314	Vsig8	Tet
chr1	172563044	172563470	427	*	3' UTR	1	172555938	172563717	7780	1	240916	7106	ENSMUSG00000049598	Vsig8	V-set and immunoglobulin domain containing 8	240916;677296;71319;71870;74748	0;39081;0;42000;27098	gene_body	chr1:172563044-172563470	Vsig8	Tet
chr1	173432324	173432665	342	*	Intron (ENSMUST00000147604.7/383619, intron 5 of 11)	1	173333258	173367695	34438	2	94332	-64629	ENSMUSG00000005338	Cadm3	cell adhesion molecule 3	383619	0	gene_body	chr1:173432324-173432665	Cadm3	Tet
chr1	173437655	173437829	175	*	Intron (ENSMUST00000147604.7/383619, intron 5 of 11)	1	173333258	173367695	34438	2	94332	-69960	ENSMUSG00000005338	Cadm3	cell adhesion molecule 3	383619	0	gene_body	chr1:173437655-173437829	Cadm3	Tet
chr1	173437628	173437785	158	*	Intron (ENSMUST00000147604.7/383619, intron 5 of 11)	1	173333258	173367695	34438	2	94332	-69933	ENSMUSG00000005338	Cadm3	cell adhesion molecule 3	383619	0	gene_body	chr1:173437628-173437785	Cadm3	Tet
chr1	173440673	173441016	344	*	Intron (ENSMUST00000147604.7/383619, intron 5 of 11)	1	173333258	173367695	34438	2	94332	-72978	ENSMUSG00000005338	Cadm3	cell adhesion molecule 3	383619	0	gene_body	chr1:173440673-173441016	Cadm3	Tet
chr1	173441157	173441658	502	*	Intron (ENSMUST00000147604.7/383619, intron 5 of 11)	1	173333258	173367695	34438	2	94332	-73462	ENSMUSG00000005338	Cadm3	cell adhesion molecule 3	383619	0	gene_body	chr1:173441157-173441658	Cadm3	Tet
chr1	173441260	173441431	172	*	Intron (ENSMUST00000147604.7/383619, intron 5 of 11)	1	173333258	173367695	34438	2	94332	-73565	ENSMUSG00000005338	Cadm3	cell adhesion molecule 3	383619	0	gene_body	chr1:173441260-173441431	Cadm3	Tet
chr1	173441273	173441513	241	*	Intron (ENSMUST00000147604.7/383619, intron 5 of 11)	1	173333258	173367695	34438	2	94332	-73578	ENSMUSG00000005338	Cadm3	cell adhesion molecule 3	383619	0	gene_body	chr1:173441273-173441513	Cadm3	Tet
chr1	173673896	173674053	158	*	Promoter (<=1kb)	1	173673675	173698395	24721	1	100033459	221	ENSMUSG00000066677	Ifi208	interferon activated gene 208	100033459;226691;236312	0;67694;42979	gene_body	chr1:173673896-173674053	Ifi208	Tet
chr1	176986274	176986538	265	*	Intron (ENSMUST00000027785.14/76816, intron 16 of 17)	1	176814660	177020437	205778	1	76816	171614	ENSMUSG00000026504	Sdccag8	serologically defined colon cancer antigen 8	23797;76816	271665;0	gene_body	chr1:176986274-176986538	Sdccag8	Tet
chr1	177338792	177338997	206	*	Distal Intergenic	1	177020073	177258203	238131	2	23797	-80589	ENSMUSG00000019699	Akt3	thymoma viral proto-oncogene 3			Distal Intergenic	chr1:177338792-177338997	Akt3	Tet
chr1	177702617	177702766	150	*	Distal Intergenic	1	177729814	177753324	23511	1	69428	-27048	ENSMUSG00000015962	1700016C15Rik	RIKEN cDNA 1700016C15 gene	69428	-27048	Distal Intergenic	chr1:177702617-177702766	1700016C15Rik	Tet
chr1	177795996	177796228	233	*	Promoter (<=1kb)	1	177762962	177796511	33550	2	11566	283	ENSMUSG00000015961	Adss	adenylosuccinate synthetase, non muscle	11566;631584;69428	0;-12203;66182	gene_body	chr1:177795996-177796228	Adss	Tet
chr1	178188053	178188282	230	*	Promoter (<=1kb)	1	178187417	178257301	69885	1	78825	636	ENSMUSG00000026502	Desi2	desumoylating isopeptidase 2	545391;78825	204630;0	gene_body	chr1:178188053-178188282	Desi2	Tet
chr1	178368759	178369280	522	*	Distal Intergenic	1	178321108	178337797	16690	2	51810	-30962	ENSMUSG00000039630	Hnrnpu	heterogeneous nuclear ribonucleoprotein U	51810;66359;68226	-30962;49629;-36805	Distal Intergenic	chr1:178368759-178369280	Hnrnpu	Tet
chr1	178368935	178369433	499	*	Distal Intergenic	1	178321108	178337797	16690	2	51810	-31138	ENSMUSG00000039630	Hnrnpu	heterogeneous nuclear ribonucleoprotein U	51810;66359;68226	-31138;49805;-36652	Distal Intergenic	chr1:178368935-178369433	Hnrnpu	Tet
chr1	178368963	178369211	249	*	Distal Intergenic	1	178321108	178337797	16690	2	51810	-31166	ENSMUSG00000039630	Hnrnpu	heterogeneous nuclear ribonucleoprotein U	51810;66359;68226	-31166;49833;-36874	Distal Intergenic	chr1:178368963-178369211	Hnrnpu	Tet
chr1	178368888	178369175	288	*	Distal Intergenic	1	178321108	178337797	16690	2	51810	-31091	ENSMUSG00000039630	Hnrnpu	heterogeneous nuclear ribonucleoprotein U	51810;66359;68226	-31091;49758;-36910	Distal Intergenic	chr1:178368888-178369175	Hnrnpu	Tet
chr1	179025110	179025500	391	*	Intron (ENSMUST00000128302.7/69726, intron 10 of 11)	1	178951960	179518041	566082	2	69726	492541	ENSMUSG00000055067	Smyd3	SET and MYND domain containing 3	69726	0	gene_body	chr1:179025110-179025500	Smyd3	Tet
chr1	179549452	179549661	210	*	Intron (ENSMUST00000040706.8/226744, intron 1 of 10)	1	179546370	179627478	81109	1	226744	3082	ENSMUSG00000038949	Cnst	consortin, connexin sorting protein	15278;226744;69726	-3185;0;0	gene_body	chr1:179549452-179549661	Cnst	Tet
chr1	180225900	180226198	299	*	Distal Intergenic	1	180165238	180199602	34365	2	67426	-26298	ENSMUSG00000026489	Coq8a	coenzyme Q8A	19165;67426	37240;-26298	Distal Intergenic	chr1:180225900-180226198	Coq8a	Tet
chr1	180226311	180226619	309	*	Distal Intergenic	1	180165238	180199602	34365	2	67426	-26709	ENSMUSG00000026489	Coq8a	coenzyme Q8A	19165;67426	36819;-26709	Distal Intergenic	chr1:180226311-180226619	Coq8a	Tet
chr1	180226010	180226179	170	*	Distal Intergenic	1	180165238	180199602	34365	2	67426	-26408	ENSMUSG00000026489	Coq8a	coenzyme Q8A	19165;67426	37259;-26408	Distal Intergenic	chr1:180226010-180226179	Coq8a	Tet
chr1	180226401	180226667	267	*	Distal Intergenic	1	180165238	180199602	34365	2	67426	-26799	ENSMUSG00000026489	Coq8a	coenzyme Q8A	19165;67426	36771;-26799	Distal Intergenic	chr1:180226401-180226667	Coq8a	Tet
chr1	180279712	180280032	321	*	Distal Intergenic	1	180227004	180263438	36435	2	19165	-16274	ENSMUSG00000010609	Psen2	presenilin 2	19165;277333	-16274;48152	Distal Intergenic	chr1:180279712-180280032	Psen2	Tet
chr1	180279753	180280023	271	*	Distal Intergenic	1	180227004	180263438	36435	2	19165	-16315	ENSMUSG00000010609	Psen2	presenilin 2	19165;277333	-16315;48161	Distal Intergenic	chr1:180279753-180280023	Psen2	Tet
chr1	180303605	180304021	417	*	Distal Intergenic	1	180327174	180328184	1011	2	277333	24163		Gm5069	glyceraldehyde-3-phosphate dehydrogenase pseudogene	19165;277333;320404	-40167;24163;0	Distal Intergenic	chr1:180303605-180304021	Gm5069	Tet
chr1	180335686	180336062	377	*	Exon (ENSMUST00000195043.1/ENSMUST00000195043.1, exon 1 of 1)	1	180330485	180424802	94318	1	320404	5201	ENSMUSG00000038855	Itpkb	inositol 1,4,5-trisphosphate 3-kinase B	277333;320404	-7502;0	gene_body	chr1:180335686-180336062	Itpkb	Tet
chr1	180359438	180359675	238	*	Exon (ENSMUST00000193199.1/ENSMUST00000193199.1, exon 1 of 1)	1	180330485	180424802	94318	1	320404	28953	ENSMUSG00000038855	Itpkb	inositol 1,4,5-trisphosphate 3-kinase B	277333;320404	-31254;0	gene_body	chr1:180359438-180359675	Itpkb	Tet
chr1	180359419	180359578	160	*	Exon (ENSMUST00000193199.1/ENSMUST00000193199.1, exon 1 of 1)	1	180330485	180424802	94318	1	320404	28934	ENSMUSG00000038855	Itpkb	inositol 1,4,5-trisphosphate 3-kinase B	277333;320404	-31235;0	gene_body	chr1:180359419-180359578	Itpkb	Tet
chr1	180363989	180364414	426	*	Exon (ENSMUST00000193199.1/ENSMUST00000193199.1, exon 1 of 1)	1	180330485	180424802	94318	1	320404	33504	ENSMUSG00000038855	Itpkb	inositol 1,4,5-trisphosphate 3-kinase B	277333;320404	-35805;0	gene_body	chr1:180363989-180364414	Itpkb	Tet
chr1	180365166	180365727	562	*	Intron (ENSMUST00000070181.6/320404, intron 2 of 7)	1	180330485	180424802	94318	1	320404	34681	ENSMUSG00000038855	Itpkb	inositol 1,4,5-trisphosphate 3-kinase B	277333;320404	-36982;0	gene_body	chr1:180365166-180365727	Itpkb	Tet
chr1	180364015	180364350	336	*	Exon (ENSMUST00000193199.1/ENSMUST00000193199.1, exon 1 of 1)	1	180330485	180424802	94318	1	320404	33530	ENSMUSG00000038855	Itpkb	inositol 1,4,5-trisphosphate 3-kinase B	277333;320404	-35831;0	gene_body	chr1:180364015-180364350	Itpkb	Tet
chr1	180365255	180365655	401	*	Intron (ENSMUST00000070181.6/320404, intron 2 of 7)	1	180330485	180424802	94318	1	320404	34770	ENSMUSG00000038855	Itpkb	inositol 1,4,5-trisphosphate 3-kinase B	277333;320404	-37071;0	gene_body	chr1:180365255-180365655	Itpkb	Tet
chr1	180366465	180366718	254	*	Intron (ENSMUST00000070181.6/320404, intron 2 of 7)	1	180330485	180424802	94318	1	320404	35980	ENSMUSG00000038855	Itpkb	inositol 1,4,5-trisphosphate 3-kinase B	277333;320404	-38281;0	gene_body	chr1:180366465-180366718	Itpkb	Tet
chr1	180364027	180364390	364	*	Exon (ENSMUST00000193199.1/ENSMUST00000193199.1, exon 1 of 1)	1	180330485	180424802	94318	1	320404	33542	ENSMUSG00000038855	Itpkb	inositol 1,4,5-trisphosphate 3-kinase B	277333;320404	-35843;0	gene_body	chr1:180364027-180364390	Itpkb	Tet
chr1	180365253	180365484	232	*	Intron (ENSMUST00000070181.6/320404, intron 2 of 7)	1	180330485	180424802	94318	1	320404	34768	ENSMUSG00000038855	Itpkb	inositol 1,4,5-trisphosphate 3-kinase B	277333;320404	-37069;0	gene_body	chr1:180365253-180365484	Itpkb	Tet
chr1	180364037	180364312	276	*	Exon (ENSMUST00000193199.1/ENSMUST00000193199.1, exon 1 of 1)	1	180330485	180424802	94318	1	320404	33552	ENSMUSG00000038855	Itpkb	inositol 1,4,5-trisphosphate 3-kinase B	277333;320404	-35853;0	gene_body	chr1:180364037-180364312	Itpkb	Tet
chr1	180365282	180365448	167	*	Intron (ENSMUST00000070181.6/320404, intron 2 of 7)	1	180330485	180424802	94318	1	320404	34797	ENSMUSG00000038855	Itpkb	inositol 1,4,5-trisphosphate 3-kinase B	277333;320404	-37098;0	gene_body	chr1:180365282-180365448	Itpkb	Tet
chr1	180387424	180387854	431	*	Intron (ENSMUST00000070181.6/320404, intron 2 of 7)	1	180330485	180424802	94318	1	320404	56939	ENSMUSG00000038855	Itpkb	inositol 1,4,5-trisphosphate 3-kinase B	320404;381310	0;95650	gene_body	chr1:180387424-180387854	Itpkb	Tet
chr1	180388663	180388826	164	*	Intron (ENSMUST00000070181.6/320404, intron 2 of 7)	1	180330485	180424802	94318	1	320404	58178	ENSMUSG00000038855	Itpkb	inositol 1,4,5-trisphosphate 3-kinase B	320404;381310	0;94678	gene_body	chr1:180388663-180388826	Itpkb	Tet
chr1	180387420	180387789	370	*	Intron (ENSMUST00000070181.6/320404, intron 2 of 7)	1	180330485	180424802	94318	1	320404	56935	ENSMUSG00000038855	Itpkb	inositol 1,4,5-trisphosphate 3-kinase B	320404;381310	0;95715	gene_body	chr1:180387420-180387789	Itpkb	Tet
chr1	180387446	180387769	324	*	Intron (ENSMUST00000070181.6/320404, intron 2 of 7)	1	180330485	180424802	94318	1	320404	56961	ENSMUSG00000038855	Itpkb	inositol 1,4,5-trisphosphate 3-kinase B	320404;381310	0;95735	gene_body	chr1:180387446-180387769	Itpkb	Tet
chr1	180387540	180387820	281	*	Intron (ENSMUST00000070181.6/320404, intron 2 of 7)	1	180330485	180424802	94318	1	320404	57055	ENSMUSG00000038855	Itpkb	inositol 1,4,5-trisphosphate 3-kinase B	320404;381310	0;95684	gene_body	chr1:180387540-180387820	Itpkb	Tet
chr1	180390239	180390567	329	*	Intron (ENSMUST00000070181.6/320404, intron 2 of 7)	1	180330485	180424802	94318	1	320404	59754	ENSMUSG00000038855	Itpkb	inositol 1,4,5-trisphosphate 3-kinase B	320404;381310	0;92937	gene_body	chr1:180390239-180390567	Itpkb	Tet
chr1	180390313	180390522	210	*	Intron (ENSMUST00000070181.6/320404, intron 2 of 7)	1	180330485	180424802	94318	1	320404	59828	ENSMUSG00000038855	Itpkb	inositol 1,4,5-trisphosphate 3-kinase B	320404;381310	0;92982	gene_body	chr1:180390313-180390522	Itpkb	Tet
chr1	180390327	180390544	218	*	Intron (ENSMUST00000070181.6/320404, intron 2 of 7)	1	180330485	180424802	94318	1	320404	59842	ENSMUSG00000038855	Itpkb	inositol 1,4,5-trisphosphate 3-kinase B	320404;381310	0;92960	gene_body	chr1:180390327-180390544	Itpkb	Tet
chr1	180401769	180402034	266	*	Intron (ENSMUST00000070181.6/320404, intron 2 of 7)	1	180330485	180424802	94318	1	320404	71284	ENSMUSG00000038855	Itpkb	inositol 1,4,5-trisphosphate 3-kinase B	320404;381310	0;81470	gene_body	chr1:180401769-180402034	Itpkb	Tet
chr1	180403437	180404121	685	*	Intron (ENSMUST00000070181.6/320404, intron 2 of 7)	1	180330485	180424802	94318	1	320404	72952	ENSMUSG00000038855	Itpkb	inositol 1,4,5-trisphosphate 3-kinase B	320404;381310	0;79383	gene_body	chr1:180403437-180404121	Itpkb	Tet
chr1	180401825	180402044	220	*	Intron (ENSMUST00000070181.6/320404, intron 2 of 7)	1	180330485	180424802	94318	1	320404	71340	ENSMUSG00000038855	Itpkb	inositol 1,4,5-trisphosphate 3-kinase B	320404;381310	0;81460	gene_body	chr1:180401825-180402044	Itpkb	Tet
chr1	180403583	180404055	473	*	Intron (ENSMUST00000070181.6/320404, intron 2 of 7)	1	180330485	180424802	94318	1	320404	73098	ENSMUSG00000038855	Itpkb	inositol 1,4,5-trisphosphate 3-kinase B	320404;381310	0;79449	gene_body	chr1:180403583-180404055	Itpkb	Tet
chr1	180403591	180404097	507	*	Intron (ENSMUST00000070181.6/320404, intron 2 of 7)	1	180330485	180424802	94318	1	320404	73106	ENSMUSG00000038855	Itpkb	inositol 1,4,5-trisphosphate 3-kinase B	320404;381310	0;79407	gene_body	chr1:180403591-180404097	Itpkb	Tet
chr1	180401819	180401985	167	*	Intron (ENSMUST00000070181.6/320404, intron 2 of 7)	1	180330485	180424802	94318	1	320404	71334	ENSMUSG00000038855	Itpkb	inositol 1,4,5-trisphosphate 3-kinase B	320404;381310	0;81519	gene_body	chr1:180401819-180401985	Itpkb	Tet
chr1	180403627	180404041	415	*	Intron (ENSMUST00000070181.6/320404, intron 2 of 7)	1	180330485	180424802	94318	1	320404	73142	ENSMUSG00000038855	Itpkb	inositol 1,4,5-trisphosphate 3-kinase B	320404;381310	0;79463	gene_body	chr1:180403627-180404041	Itpkb	Tet
chr1	180431949	180432180	232	*	Distal Intergenic	1	180432387	180483504	51118	2	381310	51324	ENSMUSG00000053963	Stum	mechanosensory transduction mediator	320404;381310	0;51324	Distal Intergenic	chr1:180431949-180432180	Stum	Tet
chr1	180431952	180432145	194	*	Distal Intergenic	1	180432387	180483504	51118	2	381310	51359	ENSMUSG00000053963	Stum	mechanosensory transduction mediator	320404;381310	0;51359	Distal Intergenic	chr1:180431952-180432145	Stum	Tet
chr1	180431994	180432143	150	*	Distal Intergenic	1	180432387	180483504	51118	2	381310	51361	ENSMUSG00000053963	Stum	mechanosensory transduction mediator	320404;381310	0;51361	Distal Intergenic	chr1:180431994-180432143	Stum	Tet
chr1	180641709	180641858	150	*	Promoter (<=1kb)	1	180641150	180690694	49545	1	72568	559	ENSMUSG00000058729	Lin9	lin-9 homolog (C. elegans)	11545;72568	72785;0	gene_body	chr1:180641709-180641858	Lin9	Tet
chr1	180763955	180764128	174	*	Intron (ENSMUST00000193209.1/ENSMUST00000193209.1, intron 1 of 1)	1	180726043	180754204	28162	1	170760	37912	ENSMUSG00000026499	Acbd3	acyl-Coenzyme A binding domain containing 3	15078;170760	49815;37912	gene_body	chr1:180763955-180764128	Acbd3	Tet
chr1	180777709	180777979	271	*	Distal Intergenic	1	180800832	180813943	13112	2	15078	35964	ENSMUSG00000060743	H3f3a	H3.3 histone A	15078;170760	35964;51666	Distal Intergenic	chr1:180777709-180777979	H3f3a	Tet
chr1	180778091	180778387	297	*	Distal Intergenic	1	180800832	180813943	13112	2	15078	35556	ENSMUSG00000060743	H3f3a	H3.3 histone A	15078;170760	35556;52048	Distal Intergenic	chr1:180778091-180778387	H3f3a	Tet
chr1	180778063	180778352	290	*	Distal Intergenic	1	180800832	180813943	13112	2	15078	35591	ENSMUSG00000060743	H3f3a	H3.3 histone A	15078;170760	35591;52020	Distal Intergenic	chr1:180778063-180778352	H3f3a	Tet
chr1	180829852	180830073	222	*	Distal Intergenic	1	180800832	180813943	13112	2	15078	-15909	ENSMUSG00000060743	H3f3a	H3.3 histone A	15078;208768	-15909;-21054	Distal Intergenic	chr1:180829852-180830073	H3f3a	Tet
chr1	180829858	180830088	231	*	Distal Intergenic	1	180800832	180813943	13112	2	15078	-15915	ENSMUSG00000060743	H3f3a	H3.3 histone A	15078;208768	-15915;-21039	Distal Intergenic	chr1:180829858-180830088	H3f3a	Tet
chr1	180829855	180830064	210	*	Distal Intergenic	1	180800832	180813943	13112	2	15078	-15912	ENSMUSG00000060743	H3f3a	H3.3 histone A	15078;208768	-15912;-21063	Distal Intergenic	chr1:180829855-180830064	H3f3a	Tet
chr1	180848182	180848351	170	*	Distal Intergenic	1	180851127	180868113	16987	1	208768	-2776	ENSMUSG00000038806	Sde2	SDE2 telomere maintenance homolog (S. pombe)	15078;208768;320202	-34239;-2776;-44757	Distal Intergenic	chr1:180848182-180848351	Sde2	Tet
chr1	180911839	180912104	266	*	Distal Intergenic	1	180904293	180908088	3796	1	69051	7546	ENSMUSG00000026520	Pycr2	pyrroline-5-carboxylate reductase family, member 2	13590;208768;208795;320202;69051	-22918;60712;-30240;18731;7546	Distal Intergenic	chr1:180911839-180912104	Pycr2	Tet
chr1	181016601	181016970	370	*	Intron (ENSMUST00000036928.11/13849, intron 1 of 8)	1	180976210	181020904	44695	2	13849	3934	ENSMUSG00000038776	Ephx1	epoxide hydrolase 1, microsomal	13849;208795;619326	0;74257;-34267	gene_body	chr1:181016601-181016970	Ephx1	Tet
chr1	181016585	181016872	288	*	Intron (ENSMUST00000036928.11/13849, intron 1 of 8)	1	180976210	181020904	44695	2	13849	4032	ENSMUSG00000038776	Ephx1	epoxide hydrolase 1, microsomal	13849;208795;619326	0;74241;-34365	gene_body	chr1:181016585-181016872	Ephx1	Tet
chr1	181016629	181016778	150	*	Intron (ENSMUST00000036928.11/13849, intron 1 of 8)	1	180976210	181020904	44695	2	13849	4126	ENSMUSG00000038776	Ephx1	epoxide hydrolase 1, microsomal	13849;208795;619326	0;74285;-34459	gene_body	chr1:181016629-181016778	Ephx1	Tet
chr1	181151291	181151537	247	*	Intron (ENSMUST00000193907.5/98417, intron 1 of 3)	1	181144693	181168994	24302	1	98417	6598	ENSMUSG00000062169	Cnih4	cornichon family AMPA receptor auxiliary protein 4	226757;67459;98417	60464;-7087;0	gene_body	chr1:181151291-181151537	Cnih4	Tet
chr1	181227922	181228141	220	*	Exon (ENSMUST00000181680.1/ENSMUST00000181680.1, exon 1 of 1)	1	181173228	181212001	38774	2	226757	-15921	ENSMUSG00000038733	Wdr26	WD repeat domain 26	226757	-15921	gene_body	chr1:181227922-181228141	Wdr26	Tet
chr1	181230763	181230972	210	*	Distal Intergenic	1	181173228	181212001	38774	2	226757	-18762	ENSMUSG00000038733	Wdr26	WD repeat domain 26	226757	-18762	Distal Intergenic	chr1:181230763-181230972	Wdr26	Tet
chr1	181227935	181228125	191	*	Exon (ENSMUST00000181680.1/ENSMUST00000181680.1, exon 1 of 1)	1	181173228	181212001	38774	2	226757	-15934	ENSMUSG00000038733	Wdr26	WD repeat domain 26	226757	-15934	gene_body	chr1:181227935-181228125	Wdr26	Tet
chr1	181232312	181232493	182	*	Distal Intergenic	1	181173228	181212001	38774	2	226757	-20311	ENSMUSG00000038733	Wdr26	WD repeat domain 26	226757	-20311	Distal Intergenic	chr1:181232312-181232493	Wdr26	Tet
chr1	181256419	181256568	150	*	Distal Intergenic	1	181173228	181212001	38774	2	226757	-44418	ENSMUSG00000038733	Wdr26	WD repeat domain 26	226757	-44418	Distal Intergenic	chr1:181256419-181256568	Wdr26	Tet
chr1	181256700	181257206	507	*	Distal Intergenic	1	181173228	181212001	38774	2	226757	-44699	ENSMUSG00000038733	Wdr26	WD repeat domain 26	226757	-44699	Distal Intergenic	chr1:181256700-181257206	Wdr26	Tet
chr1	181256675	181257126	452	*	Distal Intergenic	1	181173228	181212001	38774	2	226757	-44674	ENSMUSG00000038733	Wdr26	WD repeat domain 26	226757	-44674	Distal Intergenic	chr1:181256675-181257126	Wdr26	Tet
chr1	181256764	181257088	325	*	Distal Intergenic	1	181173228	181212001	38774	2	226757	-44763	ENSMUSG00000038733	Wdr26	WD repeat domain 26	226757	-44763	Distal Intergenic	chr1:181256764-181257088	Wdr26	Tet
chr1	181256752	181257008	257	*	Distal Intergenic	1	181173228	181212001	38774	2	226757	-44751	ENSMUSG00000038733	Wdr26	WD repeat domain 26	226757	-44751	Distal Intergenic	chr1:181256752-181257008	Wdr26	Tet
chr1	181860684	181861013	330	*	Distal Intergenic	1	181815335	181843046	27712	2	98386	-17638	ENSMUSG00000004880	Lbr	lamin B receptor	13800;98386	158977;-17638	Distal Intergenic	chr1:181860684-181861013	Lbr	Tet
chr1	181860800	181860996	197	*	Distal Intergenic	1	181815335	181843046	27712	2	98386	-17754	ENSMUSG00000004880	Lbr	lamin B receptor	13800;98386	158994;-17754	Distal Intergenic	chr1:181860800-181860996	Lbr	Tet
chr1	182125034	182125334	301	*	Promoter (<=1kb)	1	182124737	182132407	7671	1	27058	297	ENSMUSG00000026511	Srp9	signal recognition particle 9	27058;625823	0;32764	gene_body	chr1:182125034-182125334	Srp9	Tet
chr1	182125050	182125348	299	*	Promoter (<=1kb)	1	182124737	182132407	7671	1	27058	313	ENSMUSG00000026511	Srp9	signal recognition particle 9	27058;625823	0;32750	gene_body	chr1:182125050-182125348	Srp9	Tet
chr1	182223984	182224190	207	*	Distal Intergenic	1	182275772	182282804	7033	2	13244	58614	ENSMUSG00000038633	Degs1	delta(4)-desaturase, sphingolipid 1			Distal Intergenic	chr1:182223984-182224190	Degs1	Tet
chr1	182254670	182255008	339	*	Distal Intergenic	1	182275772	182282804	7033	2	13244	27796	ENSMUSG00000038633	Degs1	delta(4)-desaturase, sphingolipid 1	13244;67330	0;-45826	Distal Intergenic	chr1:182254670-182255008	Degs1	Tet
chr1	182255121	182255351	231	*	Distal Intergenic	1	182275772	182282804	7033	2	13244	27453	ENSMUSG00000038633	Degs1	delta(4)-desaturase, sphingolipid 1	13244;67330	0;-45483	Distal Intergenic	chr1:182255121-182255351	Degs1	Tet
chr1	182254712	182254899	188	*	Distal Intergenic	1	182275772	182282804	7033	2	13244	27905	ENSMUSG00000038633	Degs1	delta(4)-desaturase, sphingolipid 1	13244;67330	0;-45935	Distal Intergenic	chr1:182254712-182254899	Degs1	Tet
chr1	182254730	182255054	325	*	Distal Intergenic	1	182275772	182282804	7033	2	13244	27750	ENSMUSG00000038633	Degs1	delta(4)-desaturase, sphingolipid 1	13244;67330	0;-45780	Distal Intergenic	chr1:182254730-182255054	Degs1	Tet
chr1	182281360	182281521	162	*	Promoter (1-2kb)	1	182275772	182282804	7033	2	13244	1283	ENSMUSG00000038633	Degs1	delta(4)-desaturase, sphingolipid 1	13244;67330;67948	0;-19313;0	gene_body	chr1:182281360-182281521	Degs1	Tet
chr1	182341062	182341277	216	*	Promoter (<=1kb)	1	182313102	182341629	28528	2	67948	352	ENSMUSG00000047539	Fbxo28	F-box protein 28	67330;67948	40228;0	gene_body	chr1:182341062-182341277	Fbxo28	Tet
chr1	182383112	182383372	261	*	Distal Intergenic	1	182409172	182462432	53261	1	209456	-25800	ENSMUSG00000026510	Trp53bp2	transformation related protein 53 binding protein 2	209456;67948	-25800;0	Distal Intergenic	chr1:182383112-182383372	Trp53bp2	Tet
chr1	182504316	182504480	165	*	Intron (ENSMUST00000068505.9/12334, intron 2 of 20)	1	182467260	182517608	50349	2	12334	13128	ENSMUSG00000026509	Capn2	calpain 2	12334;209456	0;95144	gene_body	chr1:182504316-182504480	Capn2	Tet
chr1	182506310	182506607	298	*	Intron (ENSMUST00000068505.9/12334, intron 2 of 20)	1	182467260	182517608	50349	2	12334	11001	ENSMUSG00000026509	Capn2	calpain 2	12334;209456	0;97138	gene_body	chr1:182506310-182506607	Capn2	Tet
chr1	182506704	182506974	271	*	Intron (ENSMUST00000068505.9/12334, intron 2 of 20)	1	182467260	182517608	50349	2	12334	10634	ENSMUSG00000026509	Capn2	calpain 2	12334;209456	0;97532	gene_body	chr1:182506704-182506974	Capn2	Tet
chr1	182506785	182506959	175	*	Intron (ENSMUST00000068505.9/12334, intron 2 of 20)	1	182467260	182517608	50349	2	12334	10649	ENSMUSG00000026509	Capn2	calpain 2	12334;209456	0;97613	gene_body	chr1:182506785-182506959	Capn2	Tet
chr1	182520131	182520337	207	*	Distal Intergenic	1	182467260	182517608	50349	2	12334	-2523	ENSMUSG00000026509	Capn2	calpain 2	12334;170725	0;-44670	Distal Intergenic	chr1:182520131-182520337	Capn2	Tet
chr1	182520108	182520294	187	*	Distal Intergenic	1	182467260	182517608	50349	2	12334	-2500	ENSMUSG00000026509	Capn2	calpain 2	12334;170725	0;-44713	Distal Intergenic	chr1:182520108-182520294	Capn2	Tet
chr1	182528001	182528277	277	*	Distal Intergenic	1	182467260	182517608	50349	2	12334	-10393	ENSMUSG00000026509	Capn2	calpain 2	12334;170725	0;-36730	Distal Intergenic	chr1:182528001-182528277	Capn2	Tet
chr1	182539405	182539556	152	*	Distal Intergenic	1	182467260	182517608	50349	2	12334	-21797	ENSMUSG00000026509	Capn2	calpain 2	12334;170725	0;-25451	Distal Intergenic	chr1:182539405-182539556	Capn2	Tet
chr1	182960190	182960394	205	*	Intron (ENSMUST00000193687.5/53791, intron 1 of 3)	1	182954788	182976044	21257	1	53791	5402	ENSMUSG00000079164	Tlr5	toll-like receptor 5	53791	0	gene_body	chr1:182960190-182960394	Tlr5	Tet
chr1	183349972	183350121	150	*	Intron (ENSMUST00000069922.8/338366, intron 2 of 22)	1	183326725	183369553	42829	2	338366	19432	ENSMUSG00000056050	Mia3	melanoma inhibitory activity 3	108909;21339;338366	52923;-38860;0	gene_body	chr1:183349972-183350121	Mia3	Tet
chr1	183987686	183988100	415	*	Distal Intergenic	1	184013302	184075636	62335	1	63953	-25202	ENSMUSG00000039384	Dusp10	dual specificity phosphatase 10	63953;73363	0;46201	Distal Intergenic	chr1:183987686-183988100	Dusp10	Tet
chr1	183987710	183988051	342	*	Distal Intergenic	1	184013302	184075636	62335	1	63953	-25251	ENSMUSG00000039384	Dusp10	dual specificity phosphatase 10	63953;73363	0;46250	Distal Intergenic	chr1:183987710-183988051	Dusp10	Tet
chr1	184005479	184006090	612	*	Distal Intergenic	1	184013302	184075636	62335	1	63953	-7212	ENSMUSG00000039384	Dusp10	dual specificity phosphatase 10	63953;73363	0;28211	Distal Intergenic	chr1:184005479-184006090	Dusp10	Tet
chr1	184005724	184006002	279	*	Distal Intergenic	1	184013302	184075636	62335	1	63953	-7300	ENSMUSG00000039384	Dusp10	dual specificity phosphatase 10	63953;73363	0;28299	Distal Intergenic	chr1:184005724-184006002	Dusp10	Tet
chr1	184005708	184006037	330	*	Distal Intergenic	1	184013302	184075636	62335	1	63953	-7265	ENSMUSG00000039384	Dusp10	dual specificity phosphatase 10	63953;73363	0;28264	Distal Intergenic	chr1:184005708-184006037	Dusp10	Tet
chr1	184005729	184005976	248	*	Distal Intergenic	1	184013302	184075636	62335	1	63953	-7326	ENSMUSG00000039384	Dusp10	dual specificity phosphatase 10	63953;73363	0;28325	Distal Intergenic	chr1:184005729-184005976	Dusp10	Tet
chr1	184042844	184043031	188	*	Intron (ENSMUST00000048655.7/63953, intron 2 of 3)	1	184033030	184034301	1272	2	73363	-8543	ENSMUSG00000044854	1700056E22Rik	RIKEN cDNA 1700056E22 gene	63953;73363	0;-8543	gene_body	chr1:184042844-184043031	1700056E22Rik	Tet
chr1	184048775	184049020	246	*	Intron (ENSMUST00000048655.7/63953, intron 2 of 3)	1	184033030	184034301	1272	2	73363	-14474	ENSMUSG00000044854	1700056E22Rik	RIKEN cDNA 1700056E22 gene	63953;73363	0;-14474	gene_body	chr1:184048775-184049020	1700056E22Rik	Tet
chr1	184048792	184048964	173	*	Intron (ENSMUST00000048655.7/63953, intron 2 of 3)	1	184033030	184034301	1272	2	73363	-14491	ENSMUSG00000044854	1700056E22Rik	RIKEN cDNA 1700056E22 gene	63953;73363	0;-14491	gene_body	chr1:184048792-184048964	1700056E22Rik	Tet
chr1	184064305	184064653	349	*	Intron (ENSMUST00000048655.7/63953, intron 2 of 3)	1	184033030	184034301	1272	2	73363	-30004	ENSMUSG00000044854	1700056E22Rik	RIKEN cDNA 1700056E22 gene	63953;73363	0;-30004	gene_body	chr1:184064305-184064653	1700056E22Rik	Tet
chr1	184118063	184118308	246	*	Distal Intergenic	1	184033030	184034301	1272	2	73363	-83762	ENSMUSG00000044854	1700056E22Rik	RIKEN cDNA 1700056E22 gene	63953	0	Distal Intergenic	chr1:184118063-184118308	1700056E22Rik	Tet
chr1	184235721	184235887	167	*	Distal Intergenic	1	184033030	184034301	1272	2	73363	-201420	ENSMUSG00000044854	1700056E22Rik	RIKEN cDNA 1700056E22 gene			Distal Intergenic	chr1:184235721-184235887	1700056E22Rik	Tet
chr1	184259927	184260137	211	*	Distal Intergenic	1	184033030	184034301	1272	2	73363	-225626	ENSMUSG00000044854	1700056E22Rik	RIKEN cDNA 1700056E22 gene			Distal Intergenic	chr1:184259927-184260137	1700056E22Rik	Tet
chr1	184260818	184261046	229	*	Distal Intergenic	1	184033030	184034301	1272	2	73363	-226517	ENSMUSG00000044854	1700056E22Rik	RIKEN cDNA 1700056E22 gene			Distal Intergenic	chr1:184260818-184261046	1700056E22Rik	Tet
chr1	184260942	184261091	150	*	Distal Intergenic	1	184033030	184034301	1272	2	73363	-226641	ENSMUSG00000044854	1700056E22Rik	RIKEN cDNA 1700056E22 gene			Distal Intergenic	chr1:184260942-184261091	1700056E22Rik	Tet
chr1	184793245	184793399	155	*	Intron (ENSMUST00000048462.12/66112, intron 6 of 6)	1	184786767	184811313	24547	2	66112	17914	ENSMUSG00000026621	Mtarc1	mitochondrial amidoxime reducing component 1	100316821;66112;67247	29089;0;53052	gene_body	chr1:184793245-184793399	Mtarc1	Tet
chr1	184793552	184793755	204	*	Intron (ENSMUST00000048462.12/66112, intron 6 of 6)	1	184786767	184811313	24547	2	66112	17558	ENSMUSG00000026621	Mtarc1	mitochondrial amidoxime reducing component 1	100316821;66112;67247	28733;0;52696	gene_body	chr1:184793552-184793755	Mtarc1	Tet
chr1	184793353	184793754	402	*	Intron (ENSMUST00000048462.12/66112, intron 6 of 6)	1	184786767	184811313	24547	2	66112	17559	ENSMUSG00000026621	Mtarc1	mitochondrial amidoxime reducing component 1	100316821;66112;67247	28734;0;52697	gene_body	chr1:184793353-184793754	Mtarc1	Tet
chr1	184793378	184793527	150	*	Intron (ENSMUST00000048462.12/66112, intron 6 of 6)	1	184786767	184811313	24547	2	66112	17786	ENSMUSG00000026621	Mtarc1	mitochondrial amidoxime reducing component 1	100316821;66112;67247	28961;0;52924	gene_body	chr1:184793378-184793527	Mtarc1	Tet
chr1	186116908	186117057	150	*	Promoter (<=1kb)	1	186087731	186117310	29580	2	226791	253	ENSMUSG00000039246	Lyplal1	lysophospholipase-like 1	226791	0	gene_body	chr1:186116908-186117057	Lyplal1	Tet
chr1	189007264	189007451	188	*	Promoter (<=1kb)	1	188971095	189007841	36747	2	226823	390	ENSMUSG00000026608	Kctd3	potassium channel tetramerisation domain containing 3	22283;226823	745241;0	gene_body	chr1:189007264-189007451	Kctd3	Tet
chr1	189867164	189867328	165	*	Intron (ENSMUST00000097442.8/19250, intron 18 of 18)	1	189880492	189922363	41872	2	226830	55035	ENSMUSG00000026603	Smyd2	SET and MYND domain containing 2	19250;226830	0;55035	gene_body	chr1:189867164-189867328	Smyd2	Tet
chr1	191193529	191194196	668	*	Intron (ENSMUST00000195117.1/11910, intron 1 of 3)	1	191170296	191218039	47744	2	11910	23843	ENSMUSG00000026628	Atf3	activating transcription factor 3	100504360;11910;619288	0;0;-28712	gene_body	chr1:191193529-191194196	Atf3	Tet
chr1	191193580	191194053	474	*	Intron (ENSMUST00000195117.1/11910, intron 1 of 3)	1	191170296	191218039	47744	2	11910	23986	ENSMUSG00000026628	Atf3	activating transcription factor 3	100504360;11910;619288	0;0;-28763	gene_body	chr1:191193580-191194053	Atf3	Tet
chr1	191193740	191194094	355	*	Intron (ENSMUST00000195117.1/11910, intron 1 of 3)	1	191170296	191218039	47744	2	11910	23945	ENSMUSG00000026628	Atf3	activating transcription factor 3	100504360;11910;619288	0;0;-28923	gene_body	chr1:191193740-191194094	Atf3	Tet
chr1	191193804	191194061	258	*	Intron (ENSMUST00000195117.1/11910, intron 1 of 3)	1	191170296	191218039	47744	2	11910	23978	ENSMUSG00000026628	Atf3	activating transcription factor 3	100504360;11910;619288	0;0;-28987	gene_body	chr1:191193804-191194061	Atf3	Tet
chr1	191224792	191225158	367	*	Promoter (<=1kb)	1	191224454	191225835	1382	1	100504360	338		D730003I15Rik	RIKEN cDNA D730003I15 gene	100504360;11910	0;0	gene_body	chr1:191224792-191225158	D730003I15Rik	Tet
chr1	191224797	191225053	257	*	Promoter (<=1kb)	1	191224454	191225835	1382	1	100504360	343		D730003I15Rik	RIKEN cDNA D730003I15 gene	100504360;11910	0;0	gene_body	chr1:191224797-191225053	D730003I15Rik	Tet
chr1	191224816	191225068	253	*	Promoter (<=1kb)	1	191224454	191225835	1382	1	100504360	362		D730003I15Rik	RIKEN cDNA D730003I15 gene	100504360;11910	0;0	gene_body	chr1:191224816-191225068	D730003I15Rik	Tet
chr1	191224936	191225140	205	*	Promoter (<=1kb)	1	191224454	191225835	1382	1	100504360	482		D730003I15Rik	RIKEN cDNA D730003I15 gene	100504360;11910	0;0	gene_body	chr1:191224936-191225140	D730003I15Rik	Tet
chr1	191259253	191259434	182	*	Distal Intergenic	1	191224454	191225835	1382	1	100504360	34799		D730003I15Rik	RIKEN cDNA D730003I15 gene	100504360;11910;66208	0;0;0	Distal Intergenic	chr1:191259253-191259434	D730003I15Rik	Tet
chr1	191312565	191312981	417	*	Intron (ENSMUST00000046770.9/66208, intron 1 of 3)	1	191306789	191318194	11406	2	66208	5213	ENSMUSG00000037499	Nenf	neuron derived neurotrophic factor	226849;66208;66950	86318;0;0	gene_body	chr1:191312565-191312981	Nenf	Tet
chr1	191312579	191312953	375	*	Intron (ENSMUST00000046770.9/66208, intron 1 of 3)	1	191306789	191318194	11406	2	66208	5241	ENSMUSG00000037499	Nenf	neuron derived neurotrophic factor	226849;66208;66950	86346;0;0	gene_body	chr1:191312579-191312953	Nenf	Tet
chr1	191312570	191312982	413	*	Intron (ENSMUST00000046770.9/66208, intron 1 of 3)	1	191306789	191318194	11406	2	66208	5212	ENSMUSG00000037499	Nenf	neuron derived neurotrophic factor	226849;66208;66950	86317;0;0	gene_body	chr1:191312570-191312982	Nenf	Tet
chr1	191326231	191326456	226	*	Promoter (<=1kb)	1	191325912	191350914	25003	1	66950	319	ENSMUSG00000026627	Pacc1	proton activated chloride channel 1	226849;66208;66950	72843;0;0	gene_body	chr1:191326231-191326456	Pacc1	Tet
chr1	191326186	191326408	223	*	Promoter (<=1kb)	1	191325912	191350914	25003	1	66950	274	ENSMUSG00000026627	Pacc1	proton activated chloride channel 1	226849;66208;66950	72891;0;0	gene_body	chr1:191326186-191326408	Pacc1	Tet
chr1	191421139	191421288	150	*	Distal Intergenic	1	191351975	191399299	47325	2	226849	-21840	ENSMUSG00000026626	Ppp2r5a	protein phosphatase 2, regulatory subunit B', alpha	102634668;226849	43760;-21840	Distal Intergenic	chr1:191421139-191421288	Ppp2r5a	Tet
chr1	191599246	191599589	344	*	Intron (ENSMUST00000045450.6/77065, intron 7 of 19)	1	191575636	191623688	48053	1	77065	23610	ENSMUSG00000037461	Ints7	integrator complex subunit 7	76843;77065	-23702;0	gene_body	chr1:191599246-191599589	Ints7	Tet
chr1	191599286	191599549	264	*	Intron (ENSMUST00000045450.6/77065, intron 7 of 19)	1	191575636	191623688	48053	1	77065	23650	ENSMUSG00000037461	Ints7	integrator complex subunit 7	76843;77065	-23742;0	gene_body	chr1:191599286-191599549	Ints7	Tet
chr1	191599398	191599551	154	*	Intron (ENSMUST00000045450.6/77065, intron 7 of 19)	1	191575636	191623688	48053	1	77065	23762	ENSMUSG00000037461	Ints7	integrator complex subunit 7	76843;77065	-23854;0	gene_body	chr1:191599398-191599551	Ints7	Tet
chr1	191718876	191719025	150	*	Promoter (1-2kb)	1	191717834	191784255	66422	1	226856	1042	ENSMUSG00000026623	Lpgat1	lysophosphatidylglycerol acyltransferase 1	226856	0	gene_body	chr1:191718876-191719025	Lpgat1	Tet
chr1	191956388	191956658	271	*	Distal Intergenic	1	191977370	191988283	10914	1	74023	-20712	ENSMUSG00000049353	Rd3	retinal degeneration 3	100628582;22033;22782;74023;98736	41976;0;49621;-20712;-48861	Distal Intergenic	chr1:191956388-191956658	Rd3	Tet
chr1	191956365	191956602	238	*	Distal Intergenic	1	191977370	191988283	10914	1	74023	-20768	ENSMUSG00000049353	Rd3	retinal degeneration 3	100628582;22033;22782;74023;98736	42032;0;49598;-20768;-48838	Distal Intergenic	chr1:191956365-191956602	Rd3	Tet
chr1	191956394	191956543	150	*	Distal Intergenic	1	191977370	191988283	10914	1	74023	-20827	ENSMUSG00000049353	Rd3	retinal degeneration 3	100628582;22033;22782;74023;98736	42091;0;49627;-20827;-48867	Distal Intergenic	chr1:191956394-191956543	Rd3	Tet
chr1	192061691	192062018	328	*	Intron (ENSMUST00000085573.11/22033, intron 4 of 11)	1	191997205	192092559	95355	2	22033	30541	ENSMUSG00000026637	Traf5	TNF receptor-associated factor 5	214742;22033	76044;0	gene_body	chr1:192061691-192062018	Traf5	Tet
chr1	192062763	192062989	227	*	Intron (ENSMUST00000085573.11/22033, intron 3 of 11)	1	191997205	192092559	95355	2	22033	29570	ENSMUSG00000026637	Traf5	TNF receptor-associated factor 5	214742;22033	75073;0	gene_body	chr1:192062763-192062989	Traf5	Tet
chr1	192078452	192078698	247	*	Intron (ENSMUST00000085573.11/22033, intron 1 of 11)	1	191997205	192092559	95355	2	22033	13861	ENSMUSG00000026637	Traf5	TNF receptor-associated factor 5	214742;22033	59364;0	gene_body	chr1:192078452-192078698	Traf5	Tet
chr1	192078457	192078614	158	*	Intron (ENSMUST00000085573.11/22033, intron 1 of 11)	1	191997205	192092559	95355	2	22033	13945	ENSMUSG00000026637	Traf5	TNF receptor-associated factor 5	214742;22033	59448;0	gene_body	chr1:192078457-192078614	Traf5	Tet
chr1	192086218	192086526	309	*	Intron (ENSMUST00000085573.11/22033, intron 1 of 11)	1	191997205	192092559	95355	2	22033	6033	ENSMUSG00000026637	Traf5	TNF receptor-associated factor 5	214742;22033	51536;0	gene_body	chr1:192086218-192086526	Traf5	Tet
chr1	192086809	192087002	194	*	Intron (ENSMUST00000085573.11/22033, intron 1 of 11)	1	191997205	192092559	95355	2	22033	5557	ENSMUSG00000026637	Traf5	TNF receptor-associated factor 5	100038712;214742;22033	-49894;51060;0	gene_body	chr1:192086809-192087002	Traf5	Tet
chr1	192086369	192086586	218	*	Intron (ENSMUST00000085573.11/22033, intron 1 of 11)	1	191997205	192092559	95355	2	22033	5973	ENSMUSG00000026637	Traf5	TNF receptor-associated factor 5	214742;22033	51476;0	gene_body	chr1:192086369-192086586	Traf5	Tet
chr1	192532298	192532465	168	*	Intron (ENSMUST00000128619.7/226861, intron 11 of 11)	1	192496711	192771223	274513	2	226861	238758	ENSMUSG00000037375	Hhat	hedgehog acyltransferase	16510;226861	341524;0	gene_body	chr1:192532298-192532465	Hhat	Tet
chr1	192537287	192537465	179	*	Intron (ENSMUST00000128619.7/226861, intron 11 of 11)	1	192496711	192771223	274513	2	226861	233758	ENSMUSG00000037375	Hhat	hedgehog acyltransferase	16510;226861	346513;0	gene_body	chr1:192537287-192537465	Hhat	Tet
chr1	192763068	192763345	278	*	Intron (ENSMUST00000128619.7/226861, intron 1 of 11)	1	192496711	192771223	274513	2	226861	7878	ENSMUSG00000037375	Hhat	hedgehog acyltransferase	226861	0	gene_body	chr1:192763068-192763345	Hhat	Tet
chr1	193189184	193189613	430	*	Intron (ENSMUST00000162454.2/ENSMUST00000162454.2, intron 1 of 1)	1	193175453	193201703	26251	2	215243	12090	ENSMUSG00000037318	Traf3ip3	TRAF3 interacting protein 3	15483;16780;215243;319266;54139	74462;0;0;21138;36073	gene_body	chr1:193189184-193189613	Traf3ip3	Tet
chr1	193208231	193208474	244	*	Promoter (<=1kb)	1	193207725	193343878	136154	1	16780	506	ENSMUSG00000026639	Lamb3	laminin, beta 3	15483;16780;215243;319266;54139	55601;0;0;40185;55120	gene_body	chr1:193208231-193208474	Lamb3	Tet
chr1	193208259	193208447	189	*	Promoter (<=1kb)	1	193207725	193343878	136154	1	16780	534	ENSMUSG00000026639	Lamb3	laminin, beta 3	15483;16780;215243;319266;54139	55628;0;0;40213;55148	gene_body	chr1:193208259-193208447	Lamb3	Tet
chr1	193338397	193338648	252	*	Intron (ENSMUST00000194677.5/16780, intron 22 of 26)	1	193346346	193370298	23953	2	215303	31650	ENSMUSG00000016179	Camk1g	calcium/calmodulin-dependent protein kinase I gamma	16780;215303	0;31650	gene_body	chr1:193338397-193338648	Camk1g	Tet
chr1	194879619	194880013	395	*	Distal Intergenic	1	194822001	194822064	64	1	100628615	57618	ENSMUSG00000092633	Mir3962	microRNA 3962			Distal Intergenic	chr1:194879619-194880013	Mir3962	Tet
chr1	194879693	194880018	326	*	Distal Intergenic	1	194822001	194822064	64	1	100628615	57692	ENSMUSG00000092633	Mir3962	microRNA 3962			Distal Intergenic	chr1:194879693-194880018	Mir3962	Tet
chr1	194879602	194879863	262	*	Distal Intergenic	1	194822001	194822064	64	1	100628615	57601	ENSMUSG00000092633	Mir3962	microRNA 3962			Distal Intergenic	chr1:194879602-194879863	Mir3962	Tet
chr10	3237094	3237253	160	*	Distal Intergenic	10	3256208	3267771	11564	2	670558	30518	ENSMUSG00000091618	H60c	histocompatibility 60c	670558	30518	Distal Intergenic	chr10:3237094-3237253	H60c	Tet
chr10	3973557	3974067	511	*	Promoter (<=1kb)	10	3973118	4167081	193964	1	270685	439	ENSMUSG00000040675	Mthfd1l	methylenetetrahydrofolate dehydrogenase (NADP+ dependent) 1-like	213783;270685	233193;0	gene_body	chr10:3973557-3974067	Mthfd1l	Tet
chr10	3973530	3974008	479	*	Promoter (<=1kb)	10	3973118	4167081	193964	1	270685	412	ENSMUSG00000040675	Mthfd1l	methylenetetrahydrofolate dehydrogenase (NADP+ dependent) 1-like	213783;270685	233166;0	gene_body	chr10:3973530-3974008	Mthfd1l	Tet
chr10	3973577	3974037	461	*	Promoter (<=1kb)	10	3973118	4167081	193964	1	270685	459	ENSMUSG00000040675	Mthfd1l	methylenetetrahydrofolate dehydrogenase (NADP+ dependent) 1-like	213783;270685	233213;0	gene_body	chr10:3973577-3974037	Mthfd1l	Tet
chr10	3973694	3974006	313	*	Promoter (<=1kb)	10	3973118	4167081	193964	1	270685	576	ENSMUSG00000040675	Mthfd1l	methylenetetrahydrofolate dehydrogenase (NADP+ dependent) 1-like	213783;270685	233330;0	gene_body	chr10:3973694-3974006	Mthfd1l	Tet
chr10	4355953	4356336	384	*	Exon (ENSMUST00000045730.6/83397, exon 3 of 4)	10	4367075	4388108	21034	2	381990	31772	ENSMUSG00000075327	Zbtb2	zinc finger and BTB domain containing 2	381990;66084;83397	31772;76052;0	gene_body	chr10:4355953-4356336	Zbtb2	Tet
chr10	4356106	4356307	202	*	Exon (ENSMUST00000045730.6/83397, exon 3 of 4)	10	4367075	4388108	21034	2	381990	31801	ENSMUSG00000075327	Zbtb2	zinc finger and BTB domain containing 2	381990;66084;83397	31801;76081;0	gene_body	chr10:4356106-4356307	Zbtb2	Tet
chr10	4357484	4357723	240	*	Exon (ENSMUST00000045730.6/83397, exon 3 of 4)	10	4367075	4388108	21034	2	381990	30385	ENSMUSG00000075327	Zbtb2	zinc finger and BTB domain containing 2	381990;66084;83397	30385;74665;0	gene_body	chr10:4357484-4357723	Zbtb2	Tet
chr10	4601793	4602023	231	*	Distal Intergenic	10	4611593	5005614	394022	1	13982	-9570	ENSMUSG00000019768	Esr1	estrogen receptor 1 (alpha)	100504234;13982	119291;0	Distal Intergenic	chr10:4601793-4602023	Esr1	Tet
chr10	4632113	4632710	598	*	Intron (ENSMUST00000149195.7/13982, intron 1 of 7)	10	4611593	5005614	394022	1	13982	20520	ENSMUSG00000019768	Esr1	estrogen receptor 1 (alpha)	13982	0	gene_body	chr10:4632113-4632710	Esr1	Tet
chr10	4632422	4632641	220	*	Intron (ENSMUST00000149195.7/13982, intron 1 of 7)	10	4611593	5005614	394022	1	13982	20829	ENSMUSG00000019768	Esr1	estrogen receptor 1 (alpha)	13982	0	gene_body	chr10:4632422-4632641	Esr1	Tet
chr10	6982779	6983236	458	*	Intron (ENSMUST00000105615.8/18390, intron 4 of 5)	10	6885796	7052478	166683	2	320495	69242	ENSMUSG00000064065	Ipcef1	interaction protein for cytohesin exchange factors 1	18390;320495	0;0	gene_body	chr10:6982779-6983236	Ipcef1	Tet
chr10	6982823	6983155	333	*	Intron (ENSMUST00000105615.8/18390, intron 4 of 5)	10	6885796	7052478	166683	2	320495	69323	ENSMUSG00000064065	Ipcef1	interaction protein for cytohesin exchange factors 1	18390;320495	0;0	gene_body	chr10:6982823-6983155	Ipcef1	Tet
chr10	6982911	6983189	279	*	Intron (ENSMUST00000105615.8/18390, intron 4 of 5)	10	6885796	7052478	166683	2	320495	69289	ENSMUSG00000064065	Ipcef1	interaction protein for cytohesin exchange factors 1	18390;320495	0;0	gene_body	chr10:6982911-6983189	Ipcef1	Tet
chr10	6982872	6983100	229	*	Intron (ENSMUST00000105615.8/18390, intron 4 of 5)	10	6885796	7052478	166683	2	320495	69378	ENSMUSG00000064065	Ipcef1	interaction protein for cytohesin exchange factors 1	18390;320495	0;0	gene_body	chr10:6982872-6983100	Ipcef1	Tet
chr10	6987496	6987777	282	*	Intron (ENSMUST00000105615.8/18390, intron 4 of 5)	10	6885796	7052478	166683	2	320495	64701	ENSMUSG00000064065	Ipcef1	interaction protein for cytohesin exchange factors 1	18390;320495	0;0	gene_body	chr10:6987496-6987777	Ipcef1	Tet
chr10	6988576	6988733	158	*	Intron (ENSMUST00000105615.8/18390, intron 4 of 5)	10	6885796	7052478	166683	2	320495	63745	ENSMUSG00000064065	Ipcef1	interaction protein for cytohesin exchange factors 1	18390;320495	0;0	gene_body	chr10:6988576-6988733	Ipcef1	Tet
chr10	6987547	6987696	150	*	Intron (ENSMUST00000105615.8/18390, intron 4 of 5)	10	6885796	7052478	166683	2	320495	64782	ENSMUSG00000064065	Ipcef1	interaction protein for cytohesin exchange factors 1	18390;320495	0;0	gene_body	chr10:6987547-6987696	Ipcef1	Tet
chr10	7211373	7211725	353	*	Promoter (<=1kb)	10	7119063	7212237	93175	2	215748	512	ENSMUSG00000015202	Cnksr3	Cnksr family member 3	215748	0	gene_body	chr10:7211373-7211725	Cnksr3	Tet
chr10	7211365	7211696	332	*	Promoter (<=1kb)	10	7119063	7212237	93175	2	215748	541	ENSMUSG00000015202	Cnksr3	Cnksr family member 3	215748	0	gene_body	chr10:7211365-7211696	Cnksr3	Tet
chr10	7211372	7211635	264	*	Promoter (<=1kb)	10	7119063	7212237	93175	2	215748	602	ENSMUSG00000015202	Cnksr3	Cnksr family member 3	215748	0	gene_body	chr10:7211372-7211635	Cnksr3	Tet
chr10	7662614	7663003	390	*	Intron (ENSMUST00000161123.7/18537, intron 1 of 8)	10	7667503	7678881	11379	1	69912	-4500	ENSMUSG00000040034	Nup43	nucleoporin 43	16798;18537;237253;69912	-18211;0;72814;-4500	gene_body	chr10:7662614-7663003	Nup43	Tet
chr10	7816539	7816927	389	*	Intron (ENSMUST00000015901.10/67418, intron 12 of 12)	10	7832470	7870396	37927	1	237256	-15543	ENSMUSG00000039981	Zc3h12d	zinc finger CCCH type containing 12D	100628581;215751;237256;67418	-19454;-23739;0;0	gene_body	chr10:7816539-7816927	Zc3h12d	Tet
chr10	7824592	7825134	543	*	Downstream (1-2kb)	10	7832470	7870396	37927	1	237256	-7336	ENSMUSG00000039981	Zc3h12d	zinc finger CCCH type containing 12D	100628581;215751;237256;67418	-11247;-31792;0;0	gene_body	chr10:7824592-7825134	Zc3h12d	Tet
chr10	7826081	7826506	426	*	Downstream (2-3kb)	10	7832470	7870396	37927	1	237256	-5964	ENSMUSG00000039981	Zc3h12d	zinc finger CCCH type containing 12D	100628581;215751;237256;67418	-9875;-33281;0;0	gene_body	chr10:7826081-7826506	Zc3h12d	Tet
chr10	7824622	7824967	346	*	Downstream (1-2kb)	10	7832470	7870396	37927	1	237256	-7503	ENSMUSG00000039981	Zc3h12d	zinc finger CCCH type containing 12D	100628581;215751;237256;67418	-11414;-31822;0;0	gene_body	chr10:7824622-7824967	Zc3h12d	Tet
chr10	7826185	7826414	230	*	Distal Intergenic	10	7832470	7870396	37927	1	237256	-6056	ENSMUSG00000039981	Zc3h12d	zinc finger CCCH type containing 12D	100628581;215751;237256;67418	-9967;-33385;0;0	Distal Intergenic	chr10:7826185-7826414	Zc3h12d	Tet
chr10	7824683	7825044	362	*	Downstream (1-2kb)	10	7832470	7870396	37927	1	237256	-7426	ENSMUSG00000039981	Zc3h12d	zinc finger CCCH type containing 12D	100628581;215751;237256;67418	-11337;-31883;0;0	gene_body	chr10:7824683-7825044	Zc3h12d	Tet
chr10	7826084	7826463	380	*	Downstream (2-3kb)	10	7832470	7870396	37927	1	237256	-6007	ENSMUSG00000039981	Zc3h12d	zinc finger CCCH type containing 12D	100628581;215751;237256;67418	-9918;-33284;0;0	gene_body	chr10:7826084-7826463	Zc3h12d	Tet
chr10	7824686	7825049	364	*	Downstream (1-2kb)	10	7832470	7870396	37927	1	237256	-7421	ENSMUSG00000039981	Zc3h12d	zinc finger CCCH type containing 12D	100628581;215751;237256;67418	-11332;-31886;0;0	gene_body	chr10:7824686-7825049	Zc3h12d	Tet
chr10	7826194	7826463	270	*	Distal Intergenic	10	7832470	7870396	37927	1	237256	-6007	ENSMUSG00000039981	Zc3h12d	zinc finger CCCH type containing 12D	100628581;215751;237256;67418	-9918;-33394;0;0	Distal Intergenic	chr10:7826194-7826463	Zc3h12d	Tet
chr10	7838078	7838288	211	*	Promoter (1-2kb)	10	7836381	7836474	94	1	100628581	1697	ENSMUSG00000093060	Mir5104	microRNA 5104	100628581;215751;237256;67418	1697;-45278;0;0	gene_body	chr10:7838078-7838288	Mir5104	Tet
chr10	7839466	7839835	370	*	5' UTR	10	7836381	7836474	94	1	100628581	3085	ENSMUSG00000093060	Mir5104	microRNA 5104	100628581;215751;237256;67418	3085;-46666;0;0	gene_body	chr10:7839466-7839835	Mir5104	Tet
chr10	7839624	7839784	161	*	5' UTR	10	7836381	7836474	94	1	100628581	3243	ENSMUSG00000093060	Mir5104	microRNA 5104	100628581;215751;237256;67418	3243;-46824;0;0	gene_body	chr10:7839624-7839784	Mir5104	Tet
chr10	7833885	7834034	150	*	Promoter (1-2kb)	10	7832470	7870396	37927	1	237256	1415	ENSMUSG00000039981	Zc3h12d	zinc finger CCCH type containing 12D	100628581;215751;237256;67418	-2347;-41085;0;0	gene_body	chr10:7833885-7834034	Zc3h12d	Tet
chr10	7839583	7839791	209	*	5' UTR	10	7836381	7836474	94	1	100628581	3202	ENSMUSG00000093060	Mir5104	microRNA 5104	100628581;215751;237256;67418	3202;-46783;0;0	gene_body	chr10:7839583-7839791	Mir5104	Tet
chr10	7844333	7844484	152	*	Intron (ENSMUST00000039484.5/237256, intron 2 of 5)	10	7836381	7836474	94	1	100628581	7952	ENSMUSG00000093060	Mir5104	microRNA 5104	100628581;237256;67418	7952;0;0	gene_body	chr10:7844333-7844484	Mir5104	Tet
chr10	7844287	7844489	203	*	Intron (ENSMUST00000039484.5/237256, intron 2 of 5)	10	7836381	7836474	94	1	100628581	7906	ENSMUSG00000093060	Mir5104	microRNA 5104	100628581;237256;67418	7906;0;0	gene_body	chr10:7844287-7844489	Mir5104	Tet
chr10	7992703	7992917	215	*	Distal Intergenic	10	7905653	7956230	50578	2	68652	-36473	ENSMUSG00000015755	Tab2	TGF-beta activated kinase 1/MAP3K7 binding protein 2	68652	-36473	Distal Intergenic	chr10:7992703-7992917	Tab2	Tet
chr10	8055413	8055595	183	*	Distal Intergenic	10	7905653	7956230	50578	2	68652	-99183	ENSMUSG00000015755	Tab2	TGF-beta activated kinase 1/MAP3K7 binding protein 2			Distal Intergenic	chr10:8055413-8055595	Tab2	Tet
chr10	8055381	8055555	175	*	Distal Intergenic	10	7905653	7956230	50578	2	68652	-99151	ENSMUSG00000015755	Tab2	TGF-beta activated kinase 1/MAP3K7 binding protein 2			Distal Intergenic	chr10:8055381-8055555	Tab2	Tet
chr10	8130896	8131210	315	*	Distal Intergenic	10	7905653	7956230	50578	2	68652	-174666	ENSMUSG00000015755	Tab2	TGF-beta activated kinase 1/MAP3K7 binding protein 2			Distal Intergenic	chr10:8130896-8131210	Tab2	Tet
chr10	8213955	8214362	408	*	Intron (ENSMUST00000219116.1/338362, intron 6 of 6)	10	7905653	7956230	50578	2	68652	-257725	ENSMUSG00000015755	Tab2	TGF-beta activated kinase 1/MAP3K7 binding protein 2	338362	0	gene_body	chr10:8213955-8214362	Tab2	Tet
chr10	8213985	8214335	351	*	Intron (ENSMUST00000219116.1/338362, intron 6 of 6)	10	7905653	7956230	50578	2	68652	-257755	ENSMUSG00000015755	Tab2	TGF-beta activated kinase 1/MAP3K7 binding protein 2	338362	0	gene_body	chr10:8213985-8214335	Tab2	Tet
chr10	8213995	8214321	327	*	Intron (ENSMUST00000219116.1/338362, intron 6 of 6)	10	7905653	7956230	50578	2	68652	-257765	ENSMUSG00000015755	Tab2	TGF-beta activated kinase 1/MAP3K7 binding protein 2	338362	0	gene_body	chr10:8213995-8214321	Tab2	Tet
chr10	8505748	8506003	256	*	Intron (ENSMUST00000061601.8/338362, intron 1 of 7)	10	8204756	8518825	314070	2	338362	12822	ENSMUSG00000047712	Ust	uronyl-2-sulfotransferase	338362	0	gene_body	chr10:8505748-8506003	Ust	Tet
chr10	8506173	8506581	409	*	Intron (ENSMUST00000061601.8/338362, intron 1 of 7)	10	8204756	8518825	314070	2	338362	12244	ENSMUSG00000047712	Ust	uronyl-2-sulfotransferase	338362	0	gene_body	chr10:8506173-8506581	Ust	Tet
chr10	8517715	8517972	258	*	Promoter (<=1kb)	10	8204756	8518825	314070	2	338362	853	ENSMUSG00000047712	Ust	uronyl-2-sulfotransferase	338362	0	gene_body	chr10:8517715-8517972	Ust	Tet
chr10	8518357	8518513	157	*	Promoter (<=1kb)	10	8204756	8518825	314070	2	338362	312	ENSMUSG00000047712	Ust	uronyl-2-sulfotransferase	338362	0	gene_body	chr10:8518357-8518513	Ust	Tet
chr10	12805921	12806181	261	*	Intron (ENSMUST00000076817.4/22288, intron 1 of 73)	10	12382188	12869365	487178	2	22288	63184	ENSMUSG00000019820	Utrn	utrophin	22288	0	gene_body	chr10:12805921-12806181	Utrn	Tet
chr10	12805922	12806230	309	*	Intron (ENSMUST00000076817.4/22288, intron 1 of 73)	10	12382188	12869365	487178	2	22288	63135	ENSMUSG00000019820	Utrn	utrophin	22288	0	gene_body	chr10:12805922-12806230	Utrn	Tet
chr10	12805950	12806099	150	*	Intron (ENSMUST00000076817.4/22288, intron 1 of 73)	10	12382188	12869365	487178	2	22288	63266	ENSMUSG00000019820	Utrn	utrophin	22288	0	gene_body	chr10:12805950-12806099	Utrn	Tet
chr10	12823849	12824216	368	*	Intron (ENSMUST00000076817.4/22288, intron 1 of 73)	10	12382188	12869365	487178	2	22288	45149	ENSMUSG00000019820	Utrn	utrophin	22288	0	gene_body	chr10:12823849-12824216	Utrn	Tet
chr10	12823881	12824214	334	*	Intron (ENSMUST00000076817.4/22288, intron 1 of 73)	10	12382188	12869365	487178	2	22288	45151	ENSMUSG00000019820	Utrn	utrophin	22288	0	gene_body	chr10:12823881-12824214	Utrn	Tet
chr10	12823915	12824212	298	*	Intron (ENSMUST00000076817.4/22288, intron 1 of 73)	10	12382188	12869365	487178	2	22288	45153	ENSMUSG00000019820	Utrn	utrophin	22288	0	gene_body	chr10:12823915-12824212	Utrn	Tet
chr10	12842536	12842932	397	*	Intron (ENSMUST00000076817.4/22288, intron 1 of 73)	10	12382188	12869365	487178	2	22288	26433	ENSMUSG00000019820	Utrn	utrophin	22288	0	gene_body	chr10:12842536-12842932	Utrn	Tet
chr10	12874909	12875177	269	*	Distal Intergenic	10	12382188	12869365	487178	2	22288	-5544	ENSMUSG00000019820	Utrn	utrophin	22288;320273	0;0	Distal Intergenic	chr10:12874909-12875177	Utrn	Tet
chr10	12874976	12875174	199	*	Distal Intergenic	10	12382188	12869365	487178	2	22288	-5611	ENSMUSG00000019820	Utrn	utrophin	22288;320273	0;0	Distal Intergenic	chr10:12874976-12875174	Utrn	Tet
chr10	12888388	12888688	301	*	Distal Intergenic	10	12382188	12869365	487178	2	22288	-19023	ENSMUSG00000019820	Utrn	utrophin	22288;320273;74732	0;0;0	Distal Intergenic	chr10:12888388-12888688	Utrn	Tet
chr10	12888472	12888683	212	*	Distal Intergenic	10	12382188	12869365	487178	2	22288	-19107	ENSMUSG00000019820	Utrn	utrophin	22288;320273;74732	0;0;0	Distal Intergenic	chr10:12888472-12888683	Utrn	Tet
chr10	12888472	12888642	171	*	Distal Intergenic	10	12382188	12869365	487178	2	22288	-19107	ENSMUSG00000019820	Utrn	utrophin	22288;320273;74732	0;0;0	Distal Intergenic	chr10:12888472-12888642	Utrn	Tet
chr10	12922496	12922661	166	*	Promoter (<=1kb)	10	12916648	12923090	6443	2	320273	429	ENSMUSG00000097378	B230208H11Rik	RIKEN cDNA B230208H11 gene	320273;74732	0;0	gene_body	chr10:12922496-12922661	B230208H11Rik	Tet
chr10	12963330	12963621	292	*	Promoter (<=1kb)	10	12938209	12964298	26090	2	74732	677	ENSMUSG00000039232	Stx11	syntaxin 11	320273;66125;74732	0;0;0	gene_body	chr10:12963330-12963621	Stx11	Tet
chr10	12963387	12963536	150	*	Promoter (<=1kb)	10	12938209	12964298	26090	2	74732	762	ENSMUSG00000039232	Stx11	syntaxin 11	320273;66125;74732	0;0;0	gene_body	chr10:12963387-12963536	Stx11	Tet
chr10	12974539	12974966	428	*	Distal Intergenic	10	12938209	12964298	26090	2	74732	-10241	ENSMUSG00000039232	Stx11	syntaxin 11	66125;74732	0;0	Distal Intergenic	chr10:12974539-12974966	Stx11	Tet
chr10	12977705	12978106	402	*	Distal Intergenic	10	12938209	12964298	26090	2	74732	-13407	ENSMUSG00000039232	Stx11	syntaxin 11	66125;74732	0;0	Distal Intergenic	chr10:12977705-12978106	Stx11	Tet
chr10	12981033	12981337	305	*	Distal Intergenic	10	12938209	12964298	26090	2	74732	-16735	ENSMUSG00000039232	Stx11	syntaxin 11	66125;74732	0;0	Distal Intergenic	chr10:12981033-12981337	Stx11	Tet
chr10	13008209	13008677	469	*	5' UTR	10	13005343	13009183	3841	1	66125	2866	ENSMUSG00000078348	Sf3b5	splicing factor 3b, subunit 5	66125;74732	0;0	gene_body	chr10:13008209-13008677	Sf3b5	Tet
chr10	13008204	13008548	345	*	5' UTR	10	13005343	13009183	3841	1	66125	2861	ENSMUSG00000078348	Sf3b5	splicing factor 3b, subunit 5	66125;74732	0;0	gene_body	chr10:13008204-13008548	Sf3b5	Tet
chr10	13008234	13008640	407	*	5' UTR	10	13005343	13009183	3841	1	66125	2891	ENSMUSG00000078348	Sf3b5	splicing factor 3b, subunit 5	66125;74732	0;0	gene_body	chr10:13008234-13008640	Sf3b5	Tet
chr10	13008245	13008603	359	*	5' UTR	10	13005343	13009183	3841	1	66125	2902	ENSMUSG00000078348	Sf3b5	splicing factor 3b, subunit 5	66125;74732	0;0	gene_body	chr10:13008245-13008603	Sf3b5	Tet
chr10	13056891	13057295	405	*	Distal Intergenic	10	13060504	13131694	71191	1	22634	-3209	ENSMUSG00000019817	Plagl1	pleiomorphic adenoma gene-like 1	22634;66125	-3209;0	Distal Intergenic	chr10:13056891-13057295	Plagl1	Tet
chr10	13304721	13305012	292	*	Intron (ENSMUST00000105545.11/215789, intron 1 of 12)	10	13178140	13193168	15029	2	353258	-111553	ENSMUSG00000019814	Ltv1	LTV1 ribosome biogenesis factor	215789	0	gene_body	chr10:13304721-13305012	Ltv1	Tet
chr10	13384868	13385131	264	*	Intron (ENSMUST00000105545.11/215789, intron 1 of 12)	10	13207717	13474412	266696	2	215789	89281	ENSMUSG00000062866	Phactr2	phosphatase and actin regulator 2	215789	0	gene_body	chr10:13384868-13385131	Phactr2	Tet
chr10	13424401	13424908	508	*	Intron (ENSMUST00000105545.11/215789, intron 1 of 12)	10	13207717	13474412	266696	2	215789	49504	ENSMUSG00000062866	Phactr2	phosphatase and actin regulator 2	215789	0	gene_body	chr10:13424401-13424908	Phactr2	Tet
chr10	13424681	13424830	150	*	Intron (ENSMUST00000105545.11/215789, intron 1 of 12)	10	13207717	13474412	266696	2	215789	49582	ENSMUSG00000062866	Phactr2	phosphatase and actin regulator 2	215789	0	gene_body	chr10:13424681-13424830	Phactr2	Tet
chr10	13424637	13424802	166	*	Intron (ENSMUST00000105545.11/215789, intron 1 of 12)	10	13207717	13474412	266696	2	215789	49610	ENSMUSG00000062866	Phactr2	phosphatase and actin regulator 2	215789	0	gene_body	chr10:13424637-13424802	Phactr2	Tet
chr10	13438519	13438763	245	*	Intron (ENSMUST00000105545.11/215789, intron 1 of 12)	10	13207717	13474412	266696	2	215789	35649	ENSMUSG00000062866	Phactr2	phosphatase and actin regulator 2	215789	0	gene_body	chr10:13438519-13438763	Phactr2	Tet
chr10	13452824	13453069	246	*	Intron (ENSMUST00000105545.11/215789, intron 1 of 12)	10	13207717	13474412	266696	2	215789	21343	ENSMUSG00000062866	Phactr2	phosphatase and actin regulator 2	215789;66848	0;-46475	gene_body	chr10:13452824-13453069	Phactr2	Tet
chr10	13466984	13467191	208	*	Intron (ENSMUST00000105545.11/215789, intron 1 of 12)	10	13207717	13474412	266696	2	215789	7221	ENSMUSG00000062866	Phactr2	phosphatase and actin regulator 2	215789;66848	0;-32353	gene_body	chr10:13466984-13467191	Phactr2	Tet
chr10	13468996	13469178	183	*	Intron (ENSMUST00000105545.11/215789, intron 1 of 12)	10	13207717	13474412	266696	2	215789	5234	ENSMUSG00000062866	Phactr2	phosphatase and actin regulator 2	215789;66848	0;-30366	gene_body	chr10:13468996-13469178	Phactr2	Tet
chr10	13473771	13473954	184	*	Promoter (<=1kb)	10	13207717	13474412	266696	2	215789	458	ENSMUSG00000062866	Phactr2	phosphatase and actin regulator 2	215789;56535;66848	0;79188;-25590	gene_body	chr10:13473771-13473954	Phactr2	Tet
chr10	13567300	13567505	206	*	Distal Intergenic	10	13523842	13553142	29301	2	56535	-14158	ENSMUSG00000019809	Pex3	peroxisomal biogenesis factor 3	56535;66757;66848	-14158;14406;67756	Distal Intergenic	chr10:13567300-13567505	Pex3	Tet
chr10	13967435	13967927	493	*	Promoter (1-2kb)	10	13966075	14151374	185300	1	15273	1360	ENSMUSG00000015501	Hivep2	human immunodeficiency virus type I enhancer binding protein 2	15273	0	gene_body	chr10:13967435-13967927	Hivep2	Tet
chr10	13967496	13967860	365	*	Promoter (1-2kb)	10	13966075	14151374	185300	1	15273	1421	ENSMUSG00000015501	Hivep2	human immunodeficiency virus type I enhancer binding protein 2	15273	0	gene_body	chr10:13967496-13967860	Hivep2	Tet
chr10	13967458	13967667	210	*	Promoter (1-2kb)	10	13966075	14151374	185300	1	15273	1383	ENSMUSG00000015501	Hivep2	human immunodeficiency virus type I enhancer binding protein 2	15273	0	gene_body	chr10:13967458-13967667	Hivep2	Tet
chr10	13967548	13967774	227	*	Promoter (1-2kb)	10	13966075	14151374	185300	1	15273	1473	ENSMUSG00000015501	Hivep2	human immunodeficiency virus type I enhancer binding protein 2	15273	0	gene_body	chr10:13967548-13967774	Hivep2	Tet
chr10	13982791	13983438	648	*	Intron (ENSMUST00000187083.6/15273, intron 1 of 12)	10	13966075	14151374	185300	1	15273	16716	ENSMUSG00000015501	Hivep2	human immunodeficiency virus type I enhancer binding protein 2	15273	0	gene_body	chr10:13982791-13983438	Hivep2	Tet
chr10	13982809	13983383	575	*	Intron (ENSMUST00000187083.6/15273, intron 1 of 12)	10	13966075	14151374	185300	1	15273	16734	ENSMUSG00000015501	Hivep2	human immunodeficiency virus type I enhancer binding protein 2	15273	0	gene_body	chr10:13982809-13983383	Hivep2	Tet
chr10	13982848	13983318	471	*	Intron (ENSMUST00000187083.6/15273, intron 1 of 12)	10	13966075	14151374	185300	1	15273	16773	ENSMUSG00000015501	Hivep2	human immunodeficiency virus type I enhancer binding protein 2	15273	0	gene_body	chr10:13982848-13983318	Hivep2	Tet
chr10	13982899	13983333	435	*	Intron (ENSMUST00000187083.6/15273, intron 1 of 12)	10	13966075	14151374	185300	1	15273	16824	ENSMUSG00000015501	Hivep2	human immunodeficiency virus type I enhancer binding protein 2	15273	0	gene_body	chr10:13982899-13983333	Hivep2	Tet
chr10	13993390	13993830	441	*	Intron (ENSMUST00000187083.6/15273, intron 1 of 12)	10	13966075	14151374	185300	1	15273	27315	ENSMUSG00000015501	Hivep2	human immunodeficiency virus type I enhancer binding protein 2	15273	0	gene_body	chr10:13993390-13993830	Hivep2	Tet
chr10	13997423	13997651	229	*	Intron (ENSMUST00000187083.6/15273, intron 1 of 12)	10	13966075	14151374	185300	1	15273	31348	ENSMUSG00000015501	Hivep2	human immunodeficiency virus type I enhancer binding protein 2	15273	0	gene_body	chr10:13997423-13997651	Hivep2	Tet
chr10	13993392	13993869	478	*	Intron (ENSMUST00000187083.6/15273, intron 1 of 12)	10	13966075	14151374	185300	1	15273	27317	ENSMUSG00000015501	Hivep2	human immunodeficiency virus type I enhancer binding protein 2	15273	0	gene_body	chr10:13993392-13993869	Hivep2	Tet
chr10	13993463	13993746	284	*	Intron (ENSMUST00000187083.6/15273, intron 1 of 12)	10	13966075	14151374	185300	1	15273	27388	ENSMUSG00000015501	Hivep2	human immunodeficiency virus type I enhancer binding protein 2	15273	0	gene_body	chr10:13993463-13993746	Hivep2	Tet
chr10	13993455	13993773	319	*	Intron (ENSMUST00000187083.6/15273, intron 1 of 12)	10	13966075	14151374	185300	1	15273	27380	ENSMUSG00000015501	Hivep2	human immunodeficiency virus type I enhancer binding protein 2	15273	0	gene_body	chr10:13993455-13993773	Hivep2	Tet
chr10	14017810	14018388	579	*	Intron (ENSMUST00000187083.6/15273, intron 2 of 12)	10	13966075	14151374	185300	1	15273	51735	ENSMUSG00000015501	Hivep2	human immunodeficiency virus type I enhancer binding protein 2	15273	0	gene_body	chr10:14017810-14018388	Hivep2	Tet
chr10	14034114	14034271	158	*	Intron (ENSMUST00000187083.6/15273, intron 2 of 12)	10	13966075	14151374	185300	1	15273	68039	ENSMUSG00000015501	Hivep2	human immunodeficiency virus type I enhancer binding protein 2	15273	0	gene_body	chr10:14034114-14034271	Hivep2	Tet
chr10	14045101	14045260	160	*	Intron (ENSMUST00000187083.6/15273, intron 2 of 12)	10	13966075	14151374	185300	1	15273	79026	ENSMUSG00000015501	Hivep2	human immunodeficiency virus type I enhancer binding protein 2	15273	0	gene_body	chr10:14045101-14045260	Hivep2	Tet
chr10	14045808	14046115	308	*	Intron (ENSMUST00000187083.6/15273, intron 2 of 12)	10	13966075	14151374	185300	1	15273	79733	ENSMUSG00000015501	Hivep2	human immunodeficiency virus type I enhancer binding protein 2	15273	0	gene_body	chr10:14045808-14046115	Hivep2	Tet
chr10	14050687	14050844	158	*	Intron (ENSMUST00000187083.6/15273, intron 2 of 12)	10	13966075	14151374	185300	1	15273	84612	ENSMUSG00000015501	Hivep2	human immunodeficiency virus type I enhancer binding protein 2	15273	0	gene_body	chr10:14050687-14050844	Hivep2	Tet
chr10	14045811	14046014	204	*	Intron (ENSMUST00000187083.6/15273, intron 2 of 12)	10	13966075	14151374	185300	1	15273	79736	ENSMUSG00000015501	Hivep2	human immunodeficiency virus type I enhancer binding protein 2	15273	0	gene_body	chr10:14045811-14046014	Hivep2	Tet
chr10	14045837	14046041	205	*	Intron (ENSMUST00000187083.6/15273, intron 2 of 12)	10	13966075	14151374	185300	1	15273	79762	ENSMUSG00000015501	Hivep2	human immunodeficiency virus type I enhancer binding protein 2	15273	0	gene_body	chr10:14045837-14046041	Hivep2	Tet
chr10	14055827	14055977	151	*	Intron (ENSMUST00000187083.6/15273, intron 2 of 12)	10	13966075	14151374	185300	1	15273	89752	ENSMUSG00000015501	Hivep2	human immunodeficiency virus type I enhancer binding protein 2	15273	0	gene_body	chr10:14055827-14055977	Hivep2	Tet
chr10	14057850	14058197	348	*	Intron (ENSMUST00000187083.6/15273, intron 2 of 12)	10	13966075	14151374	185300	1	15273	91775	ENSMUSG00000015501	Hivep2	human immunodeficiency virus type I enhancer binding protein 2	15273	0	gene_body	chr10:14057850-14058197	Hivep2	Tet
chr10	14058381	14058530	150	*	Intron (ENSMUST00000187083.6/15273, intron 2 of 12)	10	13966075	14151374	185300	1	15273	92306	ENSMUSG00000015501	Hivep2	human immunodeficiency virus type I enhancer binding protein 2	15273	0	gene_body	chr10:14058381-14058530	Hivep2	Tet
chr10	14059664	14059893	230	*	Intron (ENSMUST00000187083.6/15273, intron 2 of 12)	10	13966075	14151374	185300	1	15273	93589	ENSMUSG00000015501	Hivep2	human immunodeficiency virus type I enhancer binding protein 2	15273	0	gene_body	chr10:14059664-14059893	Hivep2	Tet
chr10	14057068	14057321	254	*	Intron (ENSMUST00000187083.6/15273, intron 2 of 12)	10	13966075	14151374	185300	1	15273	90993	ENSMUSG00000015501	Hivep2	human immunodeficiency virus type I enhancer binding protein 2	15273	0	gene_body	chr10:14057068-14057321	Hivep2	Tet
chr10	14085235	14085468	234	*	Intron (ENSMUST00000187083.6/15273, intron 3 of 12)	10	13966075	14151374	185300	1	15273	119160	ENSMUSG00000015501	Hivep2	human immunodeficiency virus type I enhancer binding protein 2	15273	0	gene_body	chr10:14085235-14085468	Hivep2	Tet
chr10	14085915	14086136	222	*	Intron (ENSMUST00000187083.6/15273, intron 3 of 12)	10	13966075	14151374	185300	1	15273	119840	ENSMUSG00000015501	Hivep2	human immunodeficiency virus type I enhancer binding protein 2	15273	0	gene_body	chr10:14085915-14086136	Hivep2	Tet
chr10	14086236	14086579	344	*	Intron (ENSMUST00000187083.6/15273, intron 3 of 12)	10	13966075	14151374	185300	1	15273	120161	ENSMUSG00000015501	Hivep2	human immunodeficiency virus type I enhancer binding protein 2	15273	0	gene_body	chr10:14086236-14086579	Hivep2	Tet
chr10	14086276	14086533	258	*	Intron (ENSMUST00000187083.6/15273, intron 3 of 12)	10	13966075	14151374	185300	1	15273	120201	ENSMUSG00000015501	Hivep2	human immunodeficiency virus type I enhancer binding protein 2	15273	0	gene_body	chr10:14086276-14086533	Hivep2	Tet
chr10	14086336	14086568	233	*	Intron (ENSMUST00000187083.6/15273, intron 3 of 12)	10	13966075	14151374	185300	1	15273	120261	ENSMUSG00000015501	Hivep2	human immunodeficiency virus type I enhancer binding protein 2	15273	0	gene_body	chr10:14086336-14086568	Hivep2	Tet
chr10	14115923	14116252	330	*	Intron (ENSMUST00000187083.6/15273, intron 4 of 12)	10	13966075	14151374	185300	1	15273	149848	ENSMUSG00000015501	Hivep2	human immunodeficiency virus type I enhancer binding protein 2	15273	0	gene_body	chr10:14115923-14116252	Hivep2	Tet
chr10	14115937	14116210	274	*	Intron (ENSMUST00000187083.6/15273, intron 4 of 12)	10	13966075	14151374	185300	1	15273	149862	ENSMUSG00000015501	Hivep2	human immunodeficiency virus type I enhancer binding protein 2	15273	0	gene_body	chr10:14115937-14116210	Hivep2	Tet
chr10	14117091	14117271	181	*	Intron (ENSMUST00000187083.6/15273, intron 4 of 12)	10	13966075	14151374	185300	1	15273	151016	ENSMUSG00000015501	Hivep2	human immunodeficiency virus type I enhancer binding protein 2	15273	0	gene_body	chr10:14117091-14117271	Hivep2	Tet
chr10	14207739	14207922	184	*	Distal Intergenic	10	13966075	14151374	185300	1	15273	241664	ENSMUSG00000015501	Hivep2	human immunodeficiency virus type I enhancer binding protein 2			Distal Intergenic	chr10:14207739-14207922	Hivep2	Tet
chr10	14314689	14314958	270	*	Exon (ENSMUST00000193951.1/ENSMUST00000193951.1, exon 1 of 1)	10	14402583	14545659	143077	2	215798	230701	ENSMUSG00000039116	Adgrg6	adhesion G protein-coupled receptor G6			gene_body	chr10:14314689-14314958	Adgrg6	Tet
chr10	14314689	14314944	256	*	Exon (ENSMUST00000193951.1/ENSMUST00000193951.1, exon 1 of 1)	10	14402583	14545659	143077	2	215798	230715	ENSMUSG00000039116	Adgrg6	adhesion G protein-coupled receptor G6			gene_body	chr10:14314689-14314944	Adgrg6	Tet
chr10	17548710	17549141	432	*	Distal Intergenic	10	17723218	17725674	2457	1	17684	-174077	ENSMUSG00000039910	Cited2	Cbp/p300-interacting transactivator, with Glu/Asp-rich carboxy-terminal domain, 2			Distal Intergenic	chr10:17548710-17549141	Cited2	Tet
chr10	17549342	17549497	156	*	Distal Intergenic	10	17723218	17725674	2457	1	17684	-173721	ENSMUSG00000039910	Cited2	Cbp/p300-interacting transactivator, with Glu/Asp-rich carboxy-terminal domain, 2			Distal Intergenic	chr10:17549342-17549497	Cited2	Tet
chr10	17548768	17549126	359	*	Distal Intergenic	10	17723218	17725674	2457	1	17684	-174092	ENSMUSG00000039910	Cited2	Cbp/p300-interacting transactivator, with Glu/Asp-rich carboxy-terminal domain, 2			Distal Intergenic	chr10:17548768-17549126	Cited2	Tet
chr10	17548821	17549048	228	*	Distal Intergenic	10	17723218	17725674	2457	1	17684	-174170	ENSMUSG00000039910	Cited2	Cbp/p300-interacting transactivator, with Glu/Asp-rich carboxy-terminal domain, 2			Distal Intergenic	chr10:17548821-17549048	Cited2	Tet
chr10	17548789	17549121	333	*	Distal Intergenic	10	17723218	17725674	2457	1	17684	-174097	ENSMUSG00000039910	Cited2	Cbp/p300-interacting transactivator, with Glu/Asp-rich carboxy-terminal domain, 2			Distal Intergenic	chr10:17548789-17549121	Cited2	Tet
chr10	17566984	17567153	170	*	Intron (ENSMUST00000219966.1/ENSMUST00000219966.1, intron 1 of 2)	10	17723218	17725674	2457	1	17684	-156065	ENSMUSG00000039910	Cited2	Cbp/p300-interacting transactivator, with Glu/Asp-rich carboxy-terminal domain, 2			gene_body	chr10:17566984-17567153	Cited2	Tet
chr10	17724310	17724543	234	*	Promoter (1-2kb)	10	17723218	17725674	2457	1	17684	1092	ENSMUSG00000039910	Cited2	Cbp/p300-interacting transactivator, with Glu/Asp-rich carboxy-terminal domain, 2	17684	0	gene_body	chr10:17724310-17724543	Cited2	Tet
chr10	17723445	17723811	367	*	Promoter (<=1kb)	10	17723218	17725674	2457	1	17684	227	ENSMUSG00000039910	Cited2	Cbp/p300-interacting transactivator, with Glu/Asp-rich carboxy-terminal domain, 2	17684	0	gene_body	chr10:17723445-17723811	Cited2	Tet
chr10	17772297	17772791	495	*	Distal Intergenic	10	17796226	17845665	49440	1	378431	-23435	ENSMUSG00000039891	Txlnb	taxilin beta	17684;378431	0;-23435	Distal Intergenic	chr10:17772297-17772791	Txlnb	Tet
chr10	17775254	17775403	150	*	Distal Intergenic	10	17796226	17845665	49440	1	378431	-20823	ENSMUSG00000039891	Txlnb	taxilin beta	17684;378431	0;-20823	Distal Intergenic	chr10:17775254-17775403	Txlnb	Tet
chr10	17772446	17772842	397	*	Distal Intergenic	10	17796226	17845665	49440	1	378431	-23384	ENSMUSG00000039891	Txlnb	taxilin beta	17684;378431	0;-23384	Distal Intergenic	chr10:17772446-17772842	Txlnb	Tet
chr10	17772404	17772782	379	*	Distal Intergenic	10	17796226	17845665	49440	1	378431	-23444	ENSMUSG00000039891	Txlnb	taxilin beta	17684;378431	0;-23444	Distal Intergenic	chr10:17772404-17772782	Txlnb	Tet
chr10	17772505	17772779	275	*	Distal Intergenic	10	17796226	17845665	49440	1	378431	-23447	ENSMUSG00000039891	Txlnb	taxilin beta	17684;378431	0;-23447	Distal Intergenic	chr10:17772505-17772779	Txlnb	Tet
chr10	17920041	17920190	150	*	Intron (ENSMUST00000037879.7/380629, intron 1 of 3)	10	17868612	17948067	79456	2	380629	27877	ENSMUSG00000039879	Heca	hdc homolog, cell cycle regulator	380629	0	gene_body	chr10:17920041-17920190	Heca	Tet
chr10	17947214	17947531	318	*	Promoter (<=1kb)	10	17868612	17948067	79456	2	380629	536	ENSMUSG00000039879	Heca	hdc homolog, cell cycle regulator	380629	0	gene_body	chr10:17947214-17947531	Heca	Tet
chr10	17947287	17947526	240	*	Promoter (<=1kb)	10	17868612	17948067	79456	2	380629	541	ENSMUSG00000039879	Heca	hdc homolog, cell cycle regulator	380629	0	gene_body	chr10:17947287-17947526	Heca	Tet
chr10	17947263	17947597	335	*	Promoter (<=1kb)	10	17868612	17948067	79456	2	380629	470	ENSMUSG00000039879	Heca	hdc homolog, cell cycle regulator	380629	0	gene_body	chr10:17947263-17947597	Heca	Tet
chr10	17947293	17947526	234	*	Promoter (<=1kb)	10	17868612	17948067	79456	2	380629	541	ENSMUSG00000039879	Heca	hdc homolog, cell cycle regulator	380629	0	gene_body	chr10:17947293-17947526	Heca	Tet
chr10	18059740	18060036	297	*	Intron (ENSMUST00000154718.7/19707, intron 1 of 16)	10	18055861	18125155	69295	1	19707	3879	ENSMUSG00000019854	Reps1	RalBP1 associated Eps domain containing protein	19707;73112	0;-36452	gene_body	chr10:18059740-18060036	Reps1	Tet
chr10	18064594	18065060	467	*	Intron (ENSMUST00000154718.7/19707, intron 1 of 16)	10	18055861	18125155	69295	1	19707	8733	ENSMUSG00000019854	Reps1	RalBP1 associated Eps domain containing protein	19707;73112	0;-41306	gene_body	chr10:18064594-18065060	Reps1	Tet
chr10	18142313	18142548	236	*	Intron (ENSMUST00000207827.1/100045792, intron 13 of 19)	10	18128903	18210890	81988	2	100045792	68342	ENSMUSG00000071392	Ect2l	epithelial cell transforming sequence 2 oncogene-like	100045792;19707	0;0	gene_body	chr10:18142313-18142548	Ect2l	Tet
chr10	18142355	18142506	152	*	Intron (ENSMUST00000207827.1/100045792, intron 13 of 19)	10	18128903	18210890	81988	2	100045792	68384	ENSMUSG00000071392	Ect2l	epithelial cell transforming sequence 2 oncogene-like	100045792;19707	0;0	gene_body	chr10:18142355-18142506	Ect2l	Tet
chr10	18193225	18193671	447	*	Intron (ENSMUST00000207827.1/100045792, intron 2 of 19)	10	18128903	18210890	81988	2	100045792	17219	ENSMUSG00000071392	Ect2l	epithelial cell transforming sequence 2 oncogene-like	100045792;215814	0;41327	gene_body	chr10:18193225-18193671	Ect2l	Tet
chr10	18197097	18197539	443	*	Intron (ENSMUST00000207827.1/100045792, intron 2 of 19)	10	18128903	18210890	81988	2	100045792	13351	ENSMUSG00000071392	Ect2l	epithelial cell transforming sequence 2 oncogene-like	100045792;215814	0;37459	gene_body	chr10:18197097-18197539	Ect2l	Tet
chr10	18917406	18917611	206	*	Distal Intergenic	10	18845020	18857073	12054	1	64058	72386	ENSMUSG00000019851	Perp	PERP, TP53 apoptosis effector			Distal Intergenic	chr10:18917406-18917611	Perp	Tet
chr10	18917463	18917627	165	*	Distal Intergenic	10	18845020	18857073	12054	1	64058	72443	ENSMUSG00000019851	Perp	PERP, TP53 apoptosis effector			Distal Intergenic	chr10:18917463-18917627	Perp	Tet
chr10	19043945	19044280	336	*	Distal Intergenic	10	19000910	19015657	14748	2	21929	-28288	ENSMUSG00000019850	Tnfaip3	tumor necrosis factor, alpha-induced protein 3	21929	-28288	Distal Intergenic	chr10:19043945-19044280	Tnfaip3	Tet
chr10	19043905	19044234	330	*	Distal Intergenic	10	19000910	19015657	14748	2	21929	-28248	ENSMUSG00000019850	Tnfaip3	tumor necrosis factor, alpha-induced protein 3	21929	-28248	Distal Intergenic	chr10:19043905-19044234	Tnfaip3	Tet
chr10	19044022	19044200	179	*	Distal Intergenic	10	19000910	19015657	14748	2	21929	-28365	ENSMUSG00000019850	Tnfaip3	tumor necrosis factor, alpha-induced protein 3	21929	-28365	Distal Intergenic	chr10:19044022-19044200	Tnfaip3	Tet
chr10	19044002	19044154	153	*	Distal Intergenic	10	19000910	19015657	14748	2	21929	-28345	ENSMUSG00000019850	Tnfaip3	tumor necrosis factor, alpha-induced protein 3	21929	-28345	Distal Intergenic	chr10:19044002-19044154	Tnfaip3	Tet
chr10	19062008	19062943	936	*	Distal Intergenic	10	19000910	19015657	14748	2	21929	-46351	ENSMUSG00000019850	Tnfaip3	tumor necrosis factor, alpha-induced protein 3	21929	-46351	Distal Intergenic	chr10:19062008-19062943	Tnfaip3	Tet
chr10	19062041	19062786	746	*	Distal Intergenic	10	19000910	19015657	14748	2	21929	-46384	ENSMUSG00000019850	Tnfaip3	tumor necrosis factor, alpha-induced protein 3	21929	-46384	Distal Intergenic	chr10:19062041-19062786	Tnfaip3	Tet
chr10	19062022	19062774	753	*	Distal Intergenic	10	19000910	19015657	14748	2	21929	-46365	ENSMUSG00000019850	Tnfaip3	tumor necrosis factor, alpha-induced protein 3	21929	-46365	Distal Intergenic	chr10:19062022-19062774	Tnfaip3	Tet
chr10	19062028	19062740	713	*	Distal Intergenic	10	19000910	19015657	14748	2	21929	-46371	ENSMUSG00000019850	Tnfaip3	tumor necrosis factor, alpha-induced protein 3	21929	-46371	Distal Intergenic	chr10:19062028-19062740	Tnfaip3	Tet
chr10	19068424	19068618	195	*	Distal Intergenic	10	19000910	19015657	14748	2	21929	-52767	ENSMUSG00000019850	Tnfaip3	tumor necrosis factor, alpha-induced protein 3			Distal Intergenic	chr10:19068424-19068618	Tnfaip3	Tet
chr10	19078126	19078425	300	*	Distal Intergenic	10	19000910	19015657	14748	2	21929	-62469	ENSMUSG00000019850	Tnfaip3	tumor necrosis factor, alpha-induced protein 3			Distal Intergenic	chr10:19078126-19078425	Tnfaip3	Tet
chr10	19094329	19094603	275	*	Exon (ENSMUST00000217363.1/ENSMUST00000217363.1, exon 4 of 4)	10	19141751	19206702	64952	1	100504265	-47148		Gm20139	predicted gene, 20139	100504265	0	gene_body	chr10:19094329-19094603	Gm20139	Tet
chr10	19094399	19094598	200	*	Exon (ENSMUST00000217363.1/ENSMUST00000217363.1, exon 4 of 4)	10	19141751	19206702	64952	1	100504265	-47153		Gm20139	predicted gene, 20139	100504265	0	gene_body	chr10:19094399-19094598	Gm20139	Tet
chr10	19104654	19105256	603	*	Distal Intergenic	10	19141751	19206702	64952	1	100504265	-36495		Gm20139	predicted gene, 20139	100504265	0	Distal Intergenic	chr10:19104654-19105256	Gm20139	Tet
chr10	19116851	19117471	621	*	Distal Intergenic	10	19141751	19206702	64952	1	100504265	-24280		Gm20139	predicted gene, 20139	100504265	0	Distal Intergenic	chr10:19116851-19117471	Gm20139	Tet
chr10	19167772	19168085	314	*	Intron (ENSMUST00000216041.1/100504265, intron 2 of 3)	10	19141751	19206702	64952	1	100504265	26021		Gm20139	predicted gene, 20139	100504265	0	gene_body	chr10:19167772-19168085	Gm20139	Tet
chr10	19167747	19167909	163	*	Intron (ENSMUST00000216041.1/100504265, intron 2 of 3)	10	19141751	19206702	64952	1	100504265	25996		Gm20139	predicted gene, 20139	100504265	0	gene_body	chr10:19167747-19167909	Gm20139	Tet
chr10	19184863	19185274	412	*	Intron (ENSMUST00000216041.1/100504265, intron 2 of 3)	10	19141751	19206702	64952	1	100504265	43112		Gm20139	predicted gene, 20139	100504265	0	gene_body	chr10:19184863-19185274	Gm20139	Tet
chr10	19185854	19186600	747	*	Intron (ENSMUST00000216041.1/100504265, intron 2 of 3)	10	19141751	19206702	64952	1	100504265	44103		Gm20139	predicted gene, 20139	100504265	0	gene_body	chr10:19185854-19186600	Gm20139	Tet
chr10	19188512	19188724	213	*	Intron (ENSMUST00000216041.1/100504265, intron 2 of 3)	10	19141751	19206702	64952	1	100504265	46761		Gm20139	predicted gene, 20139	100504265	0	gene_body	chr10:19188512-19188724	Gm20139	Tet
chr10	19184928	19185244	317	*	Intron (ENSMUST00000216041.1/100504265, intron 2 of 3)	10	19141751	19206702	64952	1	100504265	43177		Gm20139	predicted gene, 20139	100504265	0	gene_body	chr10:19184928-19185244	Gm20139	Tet
chr10	19185814	19186146	333	*	Intron (ENSMUST00000216041.1/100504265, intron 2 of 3)	10	19141751	19206702	64952	1	100504265	44063		Gm20139	predicted gene, 20139	100504265	0	gene_body	chr10:19185814-19186146	Gm20139	Tet
chr10	19184996	19185170	175	*	Intron (ENSMUST00000216041.1/100504265, intron 2 of 3)	10	19141751	19206702	64952	1	100504265	43245		Gm20139	predicted gene, 20139	100504265	0	gene_body	chr10:19184996-19185170	Gm20139	Tet
chr10	19186322	19186528	207	*	Intron (ENSMUST00000216041.1/100504265, intron 2 of 3)	10	19141751	19206702	64952	1	100504265	44571		Gm20139	predicted gene, 20139	100504265	0	gene_body	chr10:19186322-19186528	Gm20139	Tet
chr10	19321806	19322036	231	*	Intron (ENSMUST00000213234.1/ENSMUST00000213234.1, intron 4 of 4)	10	19356533	19358604	2072	1	94222	-34497	ENSMUSG00000045591	Olig3	oligodendrocyte transcription factor 3	94222	-34497	gene_body	chr10:19321806-19322036	Olig3	Tet
chr10	19321740	19322040	301	*	Intron (ENSMUST00000213234.1/ENSMUST00000213234.1, intron 4 of 4)	10	19356533	19358604	2072	1	94222	-34493	ENSMUSG00000045591	Olig3	oligodendrocyte transcription factor 3	94222	-34493	gene_body	chr10:19321740-19322040	Olig3	Tet
chr10	19577579	19577811	233	*	Distal Intergenic	10	19591949	19610229	18281	1	15979	-14138	ENSMUSG00000020009	Ifngr1	interferon gamma receptor 1	15979;237310	-14138;-44187	Distal Intergenic	chr10:19577579-19577811	Ifngr1	Tet
chr10	19578020	19578878	859	*	Distal Intergenic	10	19591949	19610229	18281	1	15979	-13071	ENSMUSG00000020009	Ifngr1	interferon gamma receptor 1	15979;237310	-13071;-43120	Distal Intergenic	chr10:19578020-19578878	Ifngr1	Tet
chr10	19578087	19578302	216	*	Distal Intergenic	10	19591949	19610229	18281	1	15979	-13647	ENSMUSG00000020009	Ifngr1	interferon gamma receptor 1	15979;237310	-13647;-43696	Distal Intergenic	chr10:19578087-19578302	Ifngr1	Tet
chr10	19691866	19692015	150	*	Distal Intergenic	10	19712570	19760053	47484	1	237313	-20555	ENSMUSG00000020007	Il20ra	interleukin 20 receptor, alpha	237313	-20555	Distal Intergenic	chr10:19691866-19692015	Il20ra	Tet
chr10	19693174	19693349	176	*	Distal Intergenic	10	19712570	19760053	47484	1	237313	-19221	ENSMUSG00000020007	Il20ra	interleukin 20 receptor, alpha	237313	-19221	Distal Intergenic	chr10:19693174-19693349	Il20ra	Tet
chr10	19691834	19692033	200	*	Distal Intergenic	10	19712570	19760053	47484	1	237313	-20537	ENSMUSG00000020007	Il20ra	interleukin 20 receptor, alpha	237313	-20537	Distal Intergenic	chr10:19691834-19692033	Il20ra	Tet
chr10	19693192	19693341	150	*	Distal Intergenic	10	19712570	19760053	47484	1	237313	-19229	ENSMUSG00000020007	Il20ra	interleukin 20 receptor, alpha	237313	-19229	Distal Intergenic	chr10:19693192-19693341	Il20ra	Tet
chr10	19850708	19850939	232	*	Promoter (<=1kb)	10	19847916	19851459	3544	2	76157	520	ENSMUSG00000050473	Slc35d3	solute carrier family 35, member D3	18634;76157	56750;0	gene_body	chr10:19850708-19850939	Slc35d3	Tet
chr10	19850562	19850731	170	*	Promoter (<=1kb)	10	19847916	19851459	3544	2	76157	728	ENSMUSG00000050473	Slc35d3	solute carrier family 35, member D3	18634;76157	56958;0	gene_body	chr10:19850562-19850731	Slc35d3	Tet
chr10	19939283	19939629	347	*	Intron (ENSMUST00000095806.9/26408, intron 1 of 29)	10	19934472	20142753	208282	1	26408	4811	ENSMUSG00000071369	Map3k5	mitogen-activated protein kinase kinase kinase 5	18634;26408	-31594;0	gene_body	chr10:19939283-19939629	Map3k5	Tet
chr10	19939296	19939541	246	*	Intron (ENSMUST00000095806.9/26408, intron 1 of 29)	10	19934472	20142753	208282	1	26408	4824	ENSMUSG00000071369	Map3k5	mitogen-activated protein kinase kinase kinase 5	18634;26408	-31607;0	gene_body	chr10:19939296-19939541	Map3k5	Tet
chr10	19939400	19939585	186	*	Intron (ENSMUST00000095806.9/26408, intron 1 of 29)	10	19934472	20142753	208282	1	26408	4928	ENSMUSG00000071369	Map3k5	mitogen-activated protein kinase kinase kinase 5	18634;26408	-31711;0	gene_body	chr10:19939400-19939585	Map3k5	Tet
chr10	19962834	19963100	267	*	Intron (ENSMUST00000095806.9/26408, intron 1 of 29)	10	19934472	20142753	208282	1	26408	28362	ENSMUSG00000071369	Map3k5	mitogen-activated protein kinase kinase kinase 5	26408	0	gene_body	chr10:19962834-19963100	Map3k5	Tet
chr10	20000450	20000626	177	*	5' UTR	10	19934472	20142753	208282	1	26408	65978	ENSMUSG00000071369	Map3k5	mitogen-activated protein kinase kinase kinase 5	26408	0	gene_body	chr10:20000450-20000626	Map3k5	Tet
chr10	20005565	20005780	216	*	Intron (ENSMUST00000095806.9/26408, intron 2 of 29)	10	19934472	20142753	208282	1	26408	71093	ENSMUSG00000071369	Map3k5	mitogen-activated protein kinase kinase kinase 5	26408	0	gene_body	chr10:20005565-20005780	Map3k5	Tet
chr10	20119489	20119729	241	*	Intron (ENSMUST00000095806.9/26408, intron 23 of 29)	10	20148471	20281590	133120	1	17761	-28742	ENSMUSG00000019996	Map7	microtubule-associated protein 7	17761;26408	-28742;0	gene_body	chr10:20119489-20119729	Map7	Tet
chr10	20119499	20119726	228	*	Intron (ENSMUST00000095806.9/26408, intron 23 of 29)	10	20148471	20281590	133120	1	17761	-28745	ENSMUSG00000019996	Map7	microtubule-associated protein 7	17761;26408	-28745;0	gene_body	chr10:20119499-20119726	Map7	Tet
chr10	21077124	21077451	328	*	Intron (ENSMUST00000105525.11/52906, intron 23 of 23)	10	21124935	21160984	36050	2	17863	83533	ENSMUSG00000019982	Myb	myeloblastosis oncogene	17863;52906	0;0	gene_body	chr10:21077124-21077451	Myb	Tet
chr10	21077136	21077433	298	*	Intron (ENSMUST00000105525.11/52906, intron 23 of 23)	10	21124935	21160984	36050	2	17863	83551	ENSMUSG00000019982	Myb	myeloblastosis oncogene	17863;52906	0;0	gene_body	chr10:21077136-21077433	Myb	Tet
chr10	21158682	21159327	646	*	Promoter (1-2kb)	10	21124935	21160984	36050	2	17863	1657	ENSMUSG00000019982	Myb	myeloblastosis oncogene	102636600;17863	-23368;0	gene_body	chr10:21158682-21159327	Myb	Tet
chr10	21178361	21178593	233	*	Intron (ENSMUST00000213692.1/ENSMUST00000213692.1, intron 3 of 4)	10	21182695	21188620	5926	1	102636600	-4102	ENSMUSG00000111005	Gm33619	predicted gene, 33619	102636600;17863	-4102;0	gene_body	chr10:21178361-21178593	Gm33619	Tet
chr10	21178818	21179055	238	*	Intron (ENSMUST00000213692.1/ENSMUST00000213692.1, intron 3 of 4)	10	21182695	21188620	5926	1	102636600	-3640	ENSMUSG00000111005	Gm33619	predicted gene, 33619	102636600;17863	-3640;0	gene_body	chr10:21178818-21179055	Gm33619	Tet
chr10	21222765	21223003	239	*	Intron (ENSMUST00000217285.1/ENSMUST00000217285.1, intron 2 of 2)	10	21182695	21188620	5926	1	102636600	40070	ENSMUSG00000111005	Gm33619	predicted gene, 33619	102636600	40070	gene_body	chr10:21222765-21223003	Gm33619	Tet
chr10	21223643	21223843	201	*	Intron (ENSMUST00000217285.1/ENSMUST00000217285.1, intron 2 of 2)	10	21182695	21188620	5926	1	102636600	40948	ENSMUSG00000111005	Gm33619	predicted gene, 33619	102636600	40948	gene_body	chr10:21223643-21223843	Gm33619	Tet
chr10	21224259	21224694	436	*	Intron (ENSMUST00000217285.1/ENSMUST00000217285.1, intron 2 of 2)	10	21182695	21188620	5926	1	102636600	41564	ENSMUSG00000111005	Gm33619	predicted gene, 33619	102636600	41564	gene_body	chr10:21224259-21224694	Gm33619	Tet
chr10	21235263	21235531	269	*	Intron (ENSMUST00000217285.1/ENSMUST00000217285.1, intron 2 of 2)	10	21182695	21188620	5926	1	102636600	52568	ENSMUSG00000111005	Gm33619	predicted gene, 33619	102636600	52568	gene_body	chr10:21235263-21235531	Gm33619	Tet
chr10	21235289	21235573	285	*	Intron (ENSMUST00000217285.1/ENSMUST00000217285.1, intron 2 of 2)	10	21182695	21188620	5926	1	102636600	52594	ENSMUSG00000111005	Gm33619	predicted gene, 33619	102636600	52594	gene_body	chr10:21235289-21235573	Gm33619	Tet
chr10	21235267	21235472	206	*	Intron (ENSMUST00000217285.1/ENSMUST00000217285.1, intron 2 of 2)	10	21182695	21188620	5926	1	102636600	52572	ENSMUSG00000111005	Gm33619	predicted gene, 33619	102636600	52572	gene_body	chr10:21235267-21235472	Gm33619	Tet
chr10	21296359	21296531	173	*	Promoter (<=1kb)	10	21295979	21368898	72920	1	56422	380	ENSMUSG00000019977	Hbs1l	Hbs1-like (S. cerevisiae)	56422;73990	0;45526	gene_body	chr10:21296359-21296531	Hbs1l	Tet
chr10	21301909	21302157	249	*	Intron (ENSMUST00000020153.9/56422, intron 2 of 17)	10	21295979	21368898	72920	1	56422	5930	ENSMUSG00000019977	Hbs1l	Hbs1-like (S. cerevisiae)	56422;73990	0;39900	gene_body	chr10:21301909-21302157	Hbs1l	Tet
chr10	21535728	21535888	161	*	Distal Intergenic	10	21593145	21622376	29232	1	67692	-57257	ENSMUSG00000050844	1700020N01Rik	RIKEN cDNA 1700020N01 gene			Distal Intergenic	chr10:21535728-21535888	1700020N01Rik	Tet
chr10	21559748	21560100	353	*	Distal Intergenic	10	21593145	21622376	29232	1	67692	-33045	ENSMUSG00000050844	1700020N01Rik	RIKEN cDNA 1700020N01 gene	67692	-33045	Distal Intergenic	chr10:21559748-21560100	1700020N01Rik	Tet
chr10	21559799	21560047	249	*	Distal Intergenic	10	21593145	21622376	29232	1	67692	-33098	ENSMUSG00000050844	1700020N01Rik	RIKEN cDNA 1700020N01 gene	67692	-33098	Distal Intergenic	chr10:21559799-21560047	1700020N01Rik	Tet
chr10	21905707	21905954	248	*	Intron (ENSMUST00000120509.7/20393, intron 1 of 13)	10	21882184	21999903	117720	1	20393	23523	ENSMUSG00000019970	Sgk1	serum/glucocorticoid regulated kinase 1	20393	0	gene_body	chr10:21905707-21905954	Sgk1	Tet
chr10	21905671	21905920	250	*	Intron (ENSMUST00000120509.7/20393, intron 1 of 13)	10	21882184	21999903	117720	1	20393	23487	ENSMUSG00000019970	Sgk1	serum/glucocorticoid regulated kinase 1	20393	0	gene_body	chr10:21905671-21905920	Sgk1	Tet
chr10	21905765	21905936	172	*	Intron (ENSMUST00000120509.7/20393, intron 1 of 13)	10	21882184	21999903	117720	1	20393	23581	ENSMUSG00000019970	Sgk1	serum/glucocorticoid regulated kinase 1	20393	0	gene_body	chr10:21905765-21905936	Sgk1	Tet
chr10	21907204	21907386	183	*	Intron (ENSMUST00000120509.7/20393, intron 1 of 13)	10	21882184	21999903	117720	1	20393	25020	ENSMUSG00000019970	Sgk1	serum/glucocorticoid regulated kinase 1	20393	0	gene_body	chr10:21907204-21907386	Sgk1	Tet
chr10	21946798	21947340	543	*	Intron (ENSMUST00000120509.7/20393, intron 2 of 13)	10	21882184	21999903	117720	1	20393	64614	ENSMUSG00000019970	Sgk1	serum/glucocorticoid regulated kinase 1	20393	0	gene_body	chr10:21946798-21947340	Sgk1	Tet
chr10	21947006	21947155	150	*	Intron (ENSMUST00000120509.7/20393, intron 2 of 13)	10	21882184	21999903	117720	1	20393	64822	ENSMUSG00000019970	Sgk1	serum/glucocorticoid regulated kinase 1	20393	0	gene_body	chr10:21947006-21947155	Sgk1	Tet
chr10	22273591	22273857	267	*	Intron (ENSMUST00000105522.8/667281, intron 1 of 5)	10	22306702	22321765	15064	1	606736	-32845		C920009B18Rik	RIKEN cDNA C920009B18 gene	19370;606736;667281	0;-32845;0	gene_body	chr10:22273591-22273857	C920009B18Rik	Tet
chr10	22298103	22298415	313	*	Intron (ENSMUST00000178026.1/19370, intron 5 of 5)	10	22306702	22321765	15064	1	606736	-8287		C920009B18Rik	RIKEN cDNA C920009B18 gene	19370;606736;667281	0;-8287;0	gene_body	chr10:22298103-22298415	C920009B18Rik	Tet
chr10	22299405	22299708	304	*	Intron (ENSMUST00000178026.1/19370, intron 5 of 5)	10	22306702	22321765	15064	1	606736	-6994		C920009B18Rik	RIKEN cDNA C920009B18 gene	19370;606736;667281	0;-6994;0	gene_body	chr10:22299405-22299708	C920009B18Rik	Tet
chr10	22299449	22299657	209	*	Intron (ENSMUST00000178026.1/19370, intron 5 of 5)	10	22306702	22321765	15064	1	606736	-7045		C920009B18Rik	RIKEN cDNA C920009B18 gene	19370;606736;667281	0;-7045;0	gene_body	chr10:22299449-22299657	C920009B18Rik	Tet
chr10	22299405	22299655	251	*	Intron (ENSMUST00000178026.1/19370, intron 5 of 5)	10	22306702	22321765	15064	1	606736	-7047		C920009B18Rik	RIKEN cDNA C920009B18 gene	19370;606736;667281	0;-7047;0	gene_body	chr10:22299405-22299655	C920009B18Rik	Tet
chr10	22345684	22346031	348	*	Exon (ENSMUST00000181698.1/ENSMUST00000181698.1, exon 1 of 1)	10	22360552	22374139	13588	1	56554	-14521	ENSMUSG00000078452	Raet1d	retinoic acid early transcript delta	19370;56554;606736	0;-14521;38982	gene_body	chr10:22345684-22346031	Raet1d	Tet
chr10	22345794	22346025	232	*	Intron (ENSMUST00000178026.1/19370, intron 5 of 5)	10	22360552	22374139	13588	1	56554	-14527	ENSMUSG00000078452	Raet1d	retinoic acid early transcript delta	19370;56554;606736	0;-14527;39092	gene_body	chr10:22345794-22346025	Raet1d	Tet
chr10	24482341	24482502	162	*	Distal Intergenic	10	24595442	24598683	3242	1	14219	-112940	ENSMUSG00000019997	Ccn2	cellular communication network factor 2			Distal Intergenic	chr10:24482341-24482502	Ccn2	Tet
chr10	24482100	24482525	426	*	Distal Intergenic	10	24595442	24598683	3242	1	14219	-112917	ENSMUSG00000019997	Ccn2	cellular communication network factor 2			Distal Intergenic	chr10:24482100-24482525	Ccn2	Tet
chr10	24636029	24636178	150	*	Distal Intergenic	10	24549447	24595817	46371	2	102638890	-40212		Gm15270	predicted gene 15270	102638890;14219;18605	-40212;40587;0	Distal Intergenic	chr10:24636029-24636178	Gm15270	Tet
chr10	24639711	24639891	181	*	3' UTR	10	24549447	24595817	46371	2	102638890	-43894		Gm15270	predicted gene 15270	102638890;14219;18605	-43894;44269;0	gene_body	chr10:24639711-24639891	Gm15270	Tet
chr10	24640567	24640835	269	*	3' UTR	10	24549447	24595817	46371	2	102638890	-44750		Gm15270	predicted gene 15270	102638890;14219;18605	-44750;45125;0	gene_body	chr10:24640567-24640835	Gm15270	Tet
chr10	24639747	24640009	263	*	3' UTR	10	24549447	24595817	46371	2	102638890	-43930		Gm15270	predicted gene 15270	102638890;14219;18605	-43930;44305;0	gene_body	chr10:24639747-24640009	Gm15270	Tet
chr10	24640550	24640728	179	*	3' UTR	10	24549447	24595817	46371	2	102638890	-44733		Gm15270	predicted gene 15270	102638890;14219;18605	-44733;45108;0	gene_body	chr10:24640550-24640728	Gm15270	Tet
chr10	24753576	24753756	181	*	Distal Intergenic	10	24637914	24712159	74246	2	18605	-41417	ENSMUSG00000037370	Enpp1	ectonucleotide pyrophosphatase/phosphodiesterase 1	18605;209558	0;89067	Distal Intergenic	chr10:24753576-24753756	Enpp1	Tet
chr10	24754233	24754694	462	*	Distal Intergenic	10	24637914	24712159	74246	2	18605	-42074	ENSMUSG00000037370	Enpp1	ectonucleotide pyrophosphatase/phosphodiesterase 1	18605;209558	0;88129	Distal Intergenic	chr10:24754233-24754694	Enpp1	Tet
chr10	24754252	24754655	404	*	Distal Intergenic	10	24637914	24712159	74246	2	18605	-42093	ENSMUSG00000037370	Enpp1	ectonucleotide pyrophosphatase/phosphodiesterase 1	18605;209558	0;88168	Distal Intergenic	chr10:24754252-24754655	Enpp1	Tet
chr10	24754453	24754617	165	*	Distal Intergenic	10	24637914	24712159	74246	2	18605	-42294	ENSMUSG00000037370	Enpp1	ectonucleotide pyrophosphatase/phosphodiesterase 1	18605;209558	0;88206	Distal Intergenic	chr10:24754453-24754617	Enpp1	Tet
chr10	25360449	25360636	188	*	Promoter (<=1kb)	10	25359798	25523519	163722	1	13822	651	ENSMUSG00000019978	Epb41l2	erythrocyte membrane protein band 4.1 like 2	13822	0	gene_body	chr10:25360449-25360636	Epb41l2	Tet
chr10	25360381	25360568	188	*	Promoter (<=1kb)	10	25359798	25523519	163722	1	13822	583	ENSMUSG00000019978	Epb41l2	erythrocyte membrane protein band 4.1 like 2	13822	0	gene_body	chr10:25360381-25360568	Epb41l2	Tet
chr10	26325342	26325719	378	*	Intron (ENSMUST00000105519.9/237339, intron 11 of 20)	10	26274468	26375971	101504	2	237339	50252	ENSMUSG00000039089	L3mbtl3	L3MBTL3 histone methyl-lysine binding protein	237339	0	gene_body	chr10:26325342-26325719	L3mbtl3	Tet
chr10	26325430	26325608	179	*	Intron (ENSMUST00000105519.9/237339, intron 11 of 20)	10	26274468	26375971	101504	2	237339	50363	ENSMUSG00000039089	L3mbtl3	L3MBTL3 histone methyl-lysine binding protein	237339	0	gene_body	chr10:26325430-26325608	L3mbtl3	Tet
chr10	26373015	26373232	218	*	Intron (ENSMUST00000105519.9/237339, intron 1 of 20)	10	26274468	26375971	101504	2	237339	2739	ENSMUSG00000039089	L3mbtl3	L3MBTL3 histone methyl-lysine binding protein	237339	0	gene_body	chr10:26373015-26373232	L3mbtl3	Tet
chr10	26799615	26800053	439	*	Intron (ENSMUST00000176060.7/73910, intron 1 of 4)	10	26753421	26918648	165228	1	73910	46194	ENSMUSG00000039031	Arhgap18	Rho GTPase activating protein 18	73910	0	gene_body	chr10:26799615-26800053	Arhgap18	Tet
chr10	26799095	26799366	272	*	Intron (ENSMUST00000176060.7/73910, intron 1 of 4)	10	26753421	26918648	165228	1	73910	45674	ENSMUSG00000039031	Arhgap18	Rho GTPase activating protein 18	73910	0	gene_body	chr10:26799095-26799366	Arhgap18	Tet
chr10	26799677	26799983	307	*	Intron (ENSMUST00000176060.7/73910, intron 1 of 4)	10	26753421	26918648	165228	1	73910	46256	ENSMUSG00000039031	Arhgap18	Rho GTPase activating protein 18	73910	0	gene_body	chr10:26799677-26799983	Arhgap18	Tet
chr10	26799730	26799889	160	*	Intron (ENSMUST00000176060.7/73910, intron 1 of 4)	10	26753421	26918648	165228	1	73910	46309	ENSMUSG00000039031	Arhgap18	Rho GTPase activating protein 18	73910	0	gene_body	chr10:26799730-26799889	Arhgap18	Tet
chr10	28519903	28520151	249	*	Intron (ENSMUST00000166468.1/19272, intron 13 of 31)	10	28668360	28883818	215459	1	210757	-148209	ENSMUSG00000049109	Themis	thymocyte selection associated	19272	0	gene_body	chr10:28519903-28520151	Themis	Tet
chr10	28567560	28567729	170	*	Intron (ENSMUST00000166468.1/19272, intron 17 of 31)	10	28668360	28883818	215459	1	210757	-100631	ENSMUSG00000049109	Themis	thymocyte selection associated	19272	0	gene_body	chr10:28567560-28567729	Themis	Tet
chr10	28593895	28594242	348	*	Intron (ENSMUST00000166468.1/19272, intron 31 of 31)	10	28668360	28883818	215459	1	210757	-74118	ENSMUSG00000049109	Themis	thymocyte selection associated	19272	0	gene_body	chr10:28593895-28594242	Themis	Tet
chr10	28593967	28594163	197	*	Intron (ENSMUST00000166468.1/19272, intron 31 of 31)	10	28668360	28883818	215459	1	210757	-74197	ENSMUSG00000049109	Themis	thymocyte selection associated	19272	0	gene_body	chr10:28593967-28594163	Themis	Tet
chr10	30538096	30538403	308	*	Intron (ENSMUST00000019927.6/73681, intron 12 of 12)	10	30534225	30600749	66525	2	73681	62346	ENSMUSG00000019792	Trmt11	tRNA methyltransferase 11	73681	0	gene_body	chr10:30538096-30538403	Trmt11	Tet
chr10	30538456	30538702	247	*	Intron (ENSMUST00000019927.6/73681, intron 12 of 12)	10	30534225	30600749	66525	2	73681	62047	ENSMUSG00000019792	Trmt11	tRNA methyltransferase 11	73681	0	gene_body	chr10:30538456-30538702	Trmt11	Tet
chr10	30538141	30538321	181	*	Intron (ENSMUST00000019927.6/73681, intron 12 of 12)	10	30534225	30600749	66525	2	73681	62428	ENSMUSG00000019792	Trmt11	tRNA methyltransferase 11	73681	0	gene_body	chr10:30538141-30538321	Trmt11	Tet
chr10	34110872	34111430	559	*	Downstream (1-2kb)	10	34087815	34096519	8705	2	103511	-14353	ENSMUSG00000049872	Calhm5	calcium homeostasis modulator family member 5	103511;212898;215900;692132	-14353;0;0;73275	gene_body	chr10:34110872-34111430	Calhm5	Tet
chr10	34110913	34111102	190	*	Downstream (1-2kb)	10	34087815	34096519	8705	2	103511	-14394	ENSMUSG00000049872	Calhm5	calcium homeostasis modulator family member 5	103511;212898;215900;692132	-14394;0;0;73316	gene_body	chr10:34110913-34111102	Calhm5	Tet
chr10	34127463	34127612	150	*	Promoter (<=1kb)	10	34126067	34127984	1918	2	215900	372	ENSMUSG00000046031	Calhm6	calcium homeostasis modulator family member 6	103511;212898;215900;692132	-30944;0;0;89866	gene_body	chr10:34127463-34127612	Calhm6	Tet
chr10	34206466	34206755	290	*	Promoter (<=1kb)	10	34151393	34207715	56323	2	212898	960	ENSMUSG00000039497	Dse	dermatan sulfate epimerase	212898	0	gene_body	chr10:34206466-34206755	Dse	Tet
chr10	34282489	34282639	151	*	Promoter (<=1kb)	10	34282190	34285275	3086	1	22110	299	ENSMUSG00000047514	Tspyl1	testis-specific protein, Y-encoded-like 1	22110;319638;72480	0;135913;-14803	gene_body	chr10:34282489-34282639	Tspyl1	Tet
chr10	36974799	36975221	423	*	Promoter (<=1kb)	10	36974544	37001889	27346	1	15182	255	ENSMUSG00000019777	Hdac2	histone deacetylase 2	15182	0	gene_body	chr10:36974799-36975221	Hdac2	Tet
chr10	37136269	37136422	154	*	Exon (ENSMUST00000092584.5/17118, exon 2 of 2)	10	37133375	37138920	5546	2	17118	2498	ENSMUSG00000069662	Marcks	myristoylated alanine rich protein kinase C substrate	17118	0	gene_body	chr10:37136269-37136422	Marcks	Tet
chr10	37136912	37137366	455	*	Promoter (1-2kb)	10	37133375	37138920	5546	2	17118	1554	ENSMUSG00000069662	Marcks	myristoylated alanine rich protein kinase C substrate	17118	0	gene_body	chr10:37136912-37137366	Marcks	Tet
chr10	37136770	37137337	568	*	Promoter (1-2kb)	10	37133375	37138920	5546	2	17118	1583	ENSMUSG00000069662	Marcks	myristoylated alanine rich protein kinase C substrate	17118	0	gene_body	chr10:37136770-37137337	Marcks	Tet
chr10	37136726	37136956	231	*	Promoter (1-2kb)	10	37133375	37138920	5546	2	17118	1964	ENSMUSG00000069662	Marcks	myristoylated alanine rich protein kinase C substrate	17118	0	gene_body	chr10:37136726-37136956	Marcks	Tet
chr10	37137021	37137321	301	*	Promoter (1-2kb)	10	37133375	37138920	5546	2	17118	1599	ENSMUSG00000069662	Marcks	myristoylated alanine rich protein kinase C substrate	17118	0	gene_body	chr10:37137021-37137321	Marcks	Tet
chr10	37136353	37136593	241	*	Exon (ENSMUST00000092584.5/17118, exon 2 of 2)	10	37133375	37138920	5546	2	17118	2327	ENSMUSG00000069662	Marcks	myristoylated alanine rich protein kinase C substrate	17118	0	gene_body	chr10:37136353-37136593	Marcks	Tet
chr10	37231907	37232501	595	*	Distal Intergenic	10	37133375	37138920	5546	2	17118	-92987	ENSMUSG00000069662	Marcks	myristoylated alanine rich protein kinase C substrate			Distal Intergenic	chr10:37231907-37232501	Marcks	Tet
chr10	37232031	37232191	161	*	Distal Intergenic	10	37133375	37138920	5546	2	17118	-93111	ENSMUSG00000069662	Marcks	myristoylated alanine rich protein kinase C substrate			Distal Intergenic	chr10:37232031-37232191	Marcks	Tet
chr10	37321276	37321507	232	*	Distal Intergenic	10	37133375	37138920	5546	2	17118	-182356	ENSMUSG00000069662	Marcks	myristoylated alanine rich protein kinase C substrate			Distal Intergenic	chr10:37321276-37321507	Marcks	Tet
chr10	37338345	37338504	160	*	Intron (ENSMUST00000181602.1/ENSMUST00000181602.1, intron 2 of 2)	10	37133375	37138920	5546	2	17118	-199425	ENSMUSG00000069662	Marcks	myristoylated alanine rich protein kinase C substrate			gene_body	chr10:37338345-37338504	Marcks	Tet
chr10	38884706	38884995	290	*	Distal Intergenic	10	38820541	38821779	1239	2	215919	-62927	ENSMUSG00000094311	Rfpl4b	ret finger protein-like 4B			Distal Intergenic	chr10:38884706-38884995	Rfpl4b	Tet
chr10	38884826	38885098	273	*	Distal Intergenic	10	38820541	38821779	1239	2	215919	-63047	ENSMUSG00000094311	Rfpl4b	ret finger protein-like 4B			Distal Intergenic	chr10:38884826-38885098	Rfpl4b	Tet
chr10	38884827	38884996	170	*	Distal Intergenic	10	38820541	38821779	1239	2	215919	-63048	ENSMUSG00000094311	Rfpl4b	ret finger protein-like 4B			Distal Intergenic	chr10:38884827-38884996	Rfpl4b	Tet
chr10	39171184	39171495	312	*	Exon (ENSMUST00000215835.1/ENSMUST00000215835.1, exon 1 of 1)	10	39150970	39163794	12825	2	327743	-7390	ENSMUSG00000062074	Ccn6	cellular communication network factor 6	327743;66337;71924	-7390;-37270;37208	gene_body	chr10:39171184-39171495	Ccn6	Tet
chr10	39171731	39172031	301	*	Exon (ENSMUST00000215835.1/ENSMUST00000215835.1, exon 1 of 1)	10	39150970	39163794	12825	2	327743	-7937	ENSMUSG00000062074	Ccn6	cellular communication network factor 6	327743;66337;71924	-7937;-37817;37755	gene_body	chr10:39171731-39172031	Ccn6	Tet
chr10	39171225	39171466	242	*	Exon (ENSMUST00000215835.1/ENSMUST00000215835.1, exon 1 of 1)	10	39150970	39163794	12825	2	327743	-7431	ENSMUSG00000062074	Ccn6	cellular communication network factor 6	327743;66337;71924	-7431;-37311;37249	gene_body	chr10:39171225-39171466	Ccn6	Tet
chr10	39171763	39172005	243	*	Exon (ENSMUST00000215835.1/ENSMUST00000215835.1, exon 1 of 1)	10	39150970	39163794	12825	2	327743	-7969	ENSMUSG00000062074	Ccn6	cellular communication network factor 6	327743;66337;71924	-7969;-37849;37787	gene_body	chr10:39171763-39172005	Ccn6	Tet
chr10	39171239	39171400	162	*	Exon (ENSMUST00000215835.1/ENSMUST00000215835.1, exon 1 of 1)	10	39150970	39163794	12825	2	327743	-7445	ENSMUSG00000062074	Ccn6	cellular communication network factor 6	327743;66337;71924	-7445;-37325;37263	gene_body	chr10:39171239-39171400	Ccn6	Tet
chr10	39171781	39171952	172	*	Exon (ENSMUST00000215835.1/ENSMUST00000215835.1, exon 1 of 1)	10	39150970	39163794	12825	2	327743	-7987	ENSMUSG00000062074	Ccn6	cellular communication network factor 6	327743;66337;71924	-7987;-37867;37805	gene_body	chr10:39171781-39171952	Ccn6	Tet
chr10	39192744	39193033	290	*	Distal Intergenic	10	39150970	39163794	12825	2	327743	-28950	ENSMUSG00000062074	Ccn6	cellular communication network factor 6	327743;71924	-28950;58768	Distal Intergenic	chr10:39192744-39193033	Ccn6	Tet
chr10	39192715	39193035	321	*	Distal Intergenic	10	39150970	39163794	12825	2	327743	-28921	ENSMUSG00000062074	Ccn6	cellular communication network factor 6	327743;71924	-28921;58739	Distal Intergenic	chr10:39192715-39193035	Ccn6	Tet
chr10	39192775	39192962	188	*	Distal Intergenic	10	39150970	39163794	12825	2	327743	-28981	ENSMUSG00000062074	Ccn6	cellular communication network factor 6	327743;71924	-28981;58799	Distal Intergenic	chr10:39192775-39192962	Ccn6	Tet
chr10	39192746	39193013	268	*	Distal Intergenic	10	39150970	39163794	12825	2	327743	-28952	ENSMUSG00000062074	Ccn6	cellular communication network factor 6	327743;71924	-28952;58770	Distal Intergenic	chr10:39192746-39193013	Ccn6	Tet
chr10	39293140	39293413	274	*	Intron (ENSMUST00000215530.1/ENSMUST00000215530.1, intron 3 of 3)	10	39368855	39565381	196527	1	14360	-75442	ENSMUSG00000019843	Fyn	Fyn proto-oncogene			gene_body	chr10:39293140-39293413	Fyn	Tet
chr10	39293052	39293405	354	*	Intron (ENSMUST00000215530.1/ENSMUST00000215530.1, intron 3 of 3)	10	39368855	39565381	196527	1	14360	-75450	ENSMUSG00000019843	Fyn	Fyn proto-oncogene			gene_body	chr10:39293052-39293405	Fyn	Tet
chr10	39293240	39293396	157	*	Intron (ENSMUST00000215530.1/ENSMUST00000215530.1, intron 3 of 3)	10	39368855	39565381	196527	1	14360	-75459	ENSMUSG00000019843	Fyn	Fyn proto-oncogene			gene_body	chr10:39293240-39293396	Fyn	Tet
chr10	39370390	39370703	314	*	Promoter (1-2kb)	10	39368855	39565381	196527	1	14360	1535	ENSMUSG00000019843	Fyn	Fyn proto-oncogene	14360	0	gene_body	chr10:39370390-39370703	Fyn	Tet
chr10	39371561	39371838	278	*	Intron (ENSMUST00000148152.7/14360, intron 1 of 4)	10	39368855	39565381	196527	1	14360	2706	ENSMUSG00000019843	Fyn	Fyn proto-oncogene	14360	0	gene_body	chr10:39371561-39371838	Fyn	Tet
chr10	39370513	39370662	150	*	Promoter (1-2kb)	10	39368855	39565381	196527	1	14360	1658	ENSMUSG00000019843	Fyn	Fyn proto-oncogene	14360	0	gene_body	chr10:39370513-39370662	Fyn	Tet
chr10	39371601	39371804	204	*	Intron (ENSMUST00000148152.7/14360, intron 1 of 4)	10	39368855	39565381	196527	1	14360	2746	ENSMUSG00000019843	Fyn	Fyn proto-oncogene	14360	0	gene_body	chr10:39371601-39371804	Fyn	Tet
chr10	39370114	39370639	526	*	Promoter (1-2kb)	10	39368855	39565381	196527	1	14360	1259	ENSMUSG00000019843	Fyn	Fyn proto-oncogene	14360	0	gene_body	chr10:39370114-39370639	Fyn	Tet
chr10	39376641	39377041	401	*	Intron (ENSMUST00000148152.7/14360, intron 1 of 4)	10	39368855	39565381	196527	1	14360	7786	ENSMUSG00000019843	Fyn	Fyn proto-oncogene	14360	0	gene_body	chr10:39376641-39377041	Fyn	Tet
chr10	39376741	39377046	306	*	Intron (ENSMUST00000148152.7/14360, intron 1 of 4)	10	39368855	39565381	196527	1	14360	7886	ENSMUSG00000019843	Fyn	Fyn proto-oncogene	14360	0	gene_body	chr10:39376741-39377046	Fyn	Tet
chr10	39376700	39377036	337	*	Intron (ENSMUST00000148152.7/14360, intron 1 of 4)	10	39368855	39565381	196527	1	14360	7845	ENSMUSG00000019843	Fyn	Fyn proto-oncogene	14360	0	gene_body	chr10:39376700-39377036	Fyn	Tet
chr10	39376796	39376981	186	*	Intron (ENSMUST00000148152.7/14360, intron 1 of 4)	10	39368855	39565381	196527	1	14360	7941	ENSMUSG00000019843	Fyn	Fyn proto-oncogene	14360	0	gene_body	chr10:39376796-39376981	Fyn	Tet
chr10	39402495	39402897	403	*	Intron (ENSMUST00000148152.7/14360, intron 2 of 4)	10	39368855	39565381	196527	1	14360	33640	ENSMUSG00000019843	Fyn	Fyn proto-oncogene	14360	0	gene_body	chr10:39402495-39402897	Fyn	Tet
chr10	39402574	39402795	222	*	Intron (ENSMUST00000148152.7/14360, intron 2 of 4)	10	39368855	39565381	196527	1	14360	33719	ENSMUSG00000019843	Fyn	Fyn proto-oncogene	14360	0	gene_body	chr10:39402574-39402795	Fyn	Tet
chr10	39412872	39413474	603	*	Intron (ENSMUST00000148152.7/14360, intron 2 of 4)	10	39368855	39565381	196527	1	14360	44017	ENSMUSG00000019843	Fyn	Fyn proto-oncogene	14360	0	gene_body	chr10:39412872-39413474	Fyn	Tet
chr10	39413322	39413471	150	*	Intron (ENSMUST00000148152.7/14360, intron 2 of 4)	10	39368855	39565381	196527	1	14360	44467	ENSMUSG00000019843	Fyn	Fyn proto-oncogene	14360	0	gene_body	chr10:39413322-39413471	Fyn	Tet
chr10	39415681	39415878	198	*	Intron (ENSMUST00000148152.7/14360, intron 2 of 4)	10	39368855	39565381	196527	1	14360	46826	ENSMUSG00000019843	Fyn	Fyn proto-oncogene	14360	0	gene_body	chr10:39415681-39415878	Fyn	Tet
chr10	39421266	39421559	294	*	Intron (ENSMUST00000148152.7/14360, intron 2 of 4)	10	39368855	39565381	196527	1	14360	52411	ENSMUSG00000019843	Fyn	Fyn proto-oncogene	14360	0	gene_body	chr10:39421266-39421559	Fyn	Tet
chr10	39421252	39421497	246	*	Intron (ENSMUST00000148152.7/14360, intron 2 of 4)	10	39368855	39565381	196527	1	14360	52397	ENSMUSG00000019843	Fyn	Fyn proto-oncogene	14360	0	gene_body	chr10:39421252-39421497	Fyn	Tet
chr10	39421348	39421497	150	*	Intron (ENSMUST00000148152.7/14360, intron 2 of 4)	10	39368855	39565381	196527	1	14360	52493	ENSMUSG00000019843	Fyn	Fyn proto-oncogene	14360	0	gene_body	chr10:39421348-39421497	Fyn	Tet
chr10	39430461	39430632	172	*	Intron (ENSMUST00000148152.7/14360, intron 2 of 4)	10	39368855	39565381	196527	1	14360	61606	ENSMUSG00000019843	Fyn	Fyn proto-oncogene	14360	0	gene_body	chr10:39430461-39430632	Fyn	Tet
chr10	39434976	39435497	522	*	Intron (ENSMUST00000148152.7/14360, intron 2 of 4)	10	39368855	39565381	196527	1	14360	66121	ENSMUSG00000019843	Fyn	Fyn proto-oncogene	14360	0	gene_body	chr10:39434976-39435497	Fyn	Tet
chr10	39435043	39435335	293	*	Intron (ENSMUST00000148152.7/14360, intron 2 of 4)	10	39368855	39565381	196527	1	14360	66188	ENSMUSG00000019843	Fyn	Fyn proto-oncogene	14360	0	gene_body	chr10:39435043-39435335	Fyn	Tet
chr10	39455908	39456179	272	*	Intron (ENSMUST00000148152.7/14360, intron 3 of 4)	10	39368855	39565381	196527	1	14360	87053	ENSMUSG00000019843	Fyn	Fyn proto-oncogene	14360	0	gene_body	chr10:39455908-39456179	Fyn	Tet
chr10	39458833	39459064	232	*	Intron (ENSMUST00000148152.7/14360, intron 3 of 4)	10	39368855	39565381	196527	1	14360	89978	ENSMUSG00000019843	Fyn	Fyn proto-oncogene	14360	0	gene_body	chr10:39458833-39459064	Fyn	Tet
chr10	39468894	39469131	238	*	Intron (ENSMUST00000148152.7/14360, intron 3 of 4)	10	39368855	39565381	196527	1	14360	100039	ENSMUSG00000019843	Fyn	Fyn proto-oncogene	14360	0	gene_body	chr10:39468894-39469131	Fyn	Tet
chr10	39469463	39469774	312	*	Intron (ENSMUST00000148152.7/14360, intron 3 of 4)	10	39368855	39565381	196527	1	14360	100608	ENSMUSG00000019843	Fyn	Fyn proto-oncogene	14360	0	gene_body	chr10:39469463-39469774	Fyn	Tet
chr10	39455929	39456165	237	*	Intron (ENSMUST00000148152.7/14360, intron 3 of 4)	10	39368855	39565381	196527	1	14360	87074	ENSMUSG00000019843	Fyn	Fyn proto-oncogene	14360	0	gene_body	chr10:39455929-39456165	Fyn	Tet
chr10	39469356	39469636	281	*	Intron (ENSMUST00000148152.7/14360, intron 3 of 4)	10	39368855	39565381	196527	1	14360	100501	ENSMUSG00000019843	Fyn	Fyn proto-oncogene	14360	0	gene_body	chr10:39469356-39469636	Fyn	Tet
chr10	39455903	39456169	267	*	Intron (ENSMUST00000148152.7/14360, intron 3 of 4)	10	39368855	39565381	196527	1	14360	87048	ENSMUSG00000019843	Fyn	Fyn proto-oncogene	14360	0	gene_body	chr10:39455903-39456169	Fyn	Tet
chr10	39479401	39479752	352	*	Intron (ENSMUST00000148152.7/14360, intron 3 of 4)	10	39368855	39565381	196527	1	14360	110546	ENSMUSG00000019843	Fyn	Fyn proto-oncogene	14360	0	gene_body	chr10:39479401-39479752	Fyn	Tet
chr10	39479402	39479668	267	*	Intron (ENSMUST00000148152.7/14360, intron 3 of 4)	10	39368855	39565381	196527	1	14360	110547	ENSMUSG00000019843	Fyn	Fyn proto-oncogene	14360	0	gene_body	chr10:39479402-39479668	Fyn	Tet
chr10	39488101	39488364	264	*	Intron (ENSMUST00000148152.7/14360, intron 3 of 4)	10	39368855	39565381	196527	1	14360	119246	ENSMUSG00000019843	Fyn	Fyn proto-oncogene	14360	0	gene_body	chr10:39488101-39488364	Fyn	Tet
chr10	39489118	39489267	150	*	Intron (ENSMUST00000148152.7/14360, intron 3 of 4)	10	39368855	39565381	196527	1	14360	120263	ENSMUSG00000019843	Fyn	Fyn proto-oncogene	14360	0	gene_body	chr10:39489118-39489267	Fyn	Tet
chr10	39492183	39492381	199	*	Intron (ENSMUST00000148152.7/14360, intron 3 of 4)	10	39612934	39655307	42374	1	103213	-120553	ENSMUSG00000019842	Traf3ip2	TRAF3 interacting protein 2	14360	0	gene_body	chr10:39492183-39492381	Traf3ip2	Tet
chr10	39489064	39489217	154	*	Intron (ENSMUST00000148152.7/14360, intron 3 of 4)	10	39368855	39565381	196527	1	14360	120209	ENSMUSG00000019843	Fyn	Fyn proto-oncogene	14360	0	gene_body	chr10:39489064-39489217	Fyn	Tet
chr10	39505617	39505839	223	*	Intron (ENSMUST00000148152.7/14360, intron 3 of 4)	10	39612934	39655307	42374	1	103213	-107095	ENSMUSG00000019842	Traf3ip2	TRAF3 interacting protein 2	14360	0	gene_body	chr10:39505617-39505839	Traf3ip2	Tet
chr10	39520199	39520562	364	*	Intron (ENSMUST00000063091.12/14360, intron 5 of 13)	10	39612934	39655307	42374	1	103213	-92372	ENSMUSG00000019842	Traf3ip2	TRAF3 interacting protein 2	100504626;14360	93120;0	gene_body	chr10:39520199-39520562	Traf3ip2	Tet
chr10	39522159	39522332	174	*	Intron (ENSMUST00000063091.12/14360, intron 5 of 13)	10	39612934	39655307	42374	1	103213	-90602	ENSMUSG00000019842	Traf3ip2	TRAF3 interacting protein 2	100504626;14360	91350;0	gene_body	chr10:39522159-39522332	Traf3ip2	Tet
chr10	40309885	40310140	256	*	Distal Intergenic	10	40287458	40302188	14731	2	11702	-7697	ENSMUSG00000075232	Amd1	S-adenosylmethionine decarboxylase 1	100041585;11702;78334	-7699;-7697;0	Distal Intergenic	chr10:40309885-40310140	Amd1	Tet
chr10	40310245	40310540	296	*	Distal Intergenic	10	40287458	40302188	14731	2	11702	-8057	ENSMUSG00000075232	Amd1	S-adenosylmethionine decarboxylase 1	100041585;11702;78334	-8059;-8057;0	Distal Intergenic	chr10:40310245-40310540	Amd1	Tet
chr10	40310360	40310509	150	*	Distal Intergenic	10	40287458	40302188	14731	2	11702	-8172	ENSMUSG00000075232	Amd1	S-adenosylmethionine decarboxylase 1	100041585;11702;78334	-8174;-8172;0	Distal Intergenic	chr10:40310360-40310509	Amd1	Tet
chr10	40479295	40479514	220	*	Intron (ENSMUST00000216736.1/78334, intron 11 of 11)	10	40570336	40604132	33797	1	70840	-90822	ENSMUSG00000019834	Slc22a16	solute carrier family 22 (organic cation transporter), member 16	78334	0	gene_body	chr10:40479295-40479514	Slc22a16	Tet
chr10	40713190	40713507	318	*	Intron (ENSMUST00000058747.3/327747, intron 1 of 4)	10	40683282	40811083	127802	1	327747	29908	ENSMUSG00000045555	Mettl24	methyltransferase like 24	327747;70503	0;83179	gene_body	chr10:40713190-40713507	Mettl24	Tet
chr10	41545372	41545540	169	*	Intron (ENSMUST00000159978.1/75973, intron 3 of 5)	10	41568016	41576476	8461	1	70538	-22476	ENSMUSG00000091370	5730435O14Rik	RIKEN cDNA 5730435O14 gene	53599;70538;73075;75973	25958;0;54933;0	gene_body	chr10:41545372-41545540	5730435O14Rik	Tet
chr10	41572194	41572488	295	*	Intron (ENSMUST00000170047.1/70538, intron 1 of 3)	10	41568016	41576476	8461	1	70538	4178	ENSMUSG00000091370	5730435O14Rik	RIKEN cDNA 5730435O14 gene	53599;70538;75973	52780;0;0	gene_body	chr10:41572194-41572488	5730435O14Rik	Tet
chr10	41595646	41595916	271	*	Intron (ENSMUST00000219054.1/75973, intron 3 of 20)	10	41568016	41576476	8461	1	70538	27630	ENSMUSG00000091370	5730435O14Rik	RIKEN cDNA 5730435O14 gene	70538;75973	0;0	gene_body	chr10:41595646-41595916	5730435O14Rik	Tet
chr10	41595687	41595873	187	*	Intron (ENSMUST00000219054.1/75973, intron 3 of 20)	10	41568016	41576476	8461	1	70538	27671	ENSMUSG00000091370	5730435O14Rik	RIKEN cDNA 5730435O14 gene	70538;75973	0;0	gene_body	chr10:41595687-41595873	5730435O14Rik	Tet
chr10	42269156	42269603	448	*	Intron (ENSMUST00000105502.7/56484, intron 2 of 3)	10	42181841	42276755	94915	2	56484	7152	ENSMUSG00000048756	Foxo3	forkhead box O3	215951;56484	208962;0	gene_body	chr10:42269156-42269603	Foxo3	Tet
chr10	42269223	42269522	300	*	Intron (ENSMUST00000105502.7/56484, intron 2 of 3)	10	42181841	42276755	94915	2	56484	7233	ENSMUSG00000048756	Foxo3	forkhead box O3	215951;56484	209043;0	gene_body	chr10:42269223-42269522	Foxo3	Tet
chr10	42269252	42269627	376	*	Intron (ENSMUST00000105502.7/56484, intron 2 of 3)	10	42181841	42276755	94915	2	56484	7128	ENSMUSG00000048756	Foxo3	forkhead box O3	215951;56484	208938;0	gene_body	chr10:42269252-42269627	Foxo3	Tet
chr10	42269171	42269320	150	*	Intron (ENSMUST00000105502.7/56484, intron 2 of 3)	10	42181841	42276755	94915	2	56484	7435	ENSMUSG00000048756	Foxo3	forkhead box O3	215951;56484	209245;0	gene_body	chr10:42269171-42269320	Foxo3	Tet
chr10	42275636	42275785	150	*	Promoter (<=1kb)	10	42181841	42276755	94915	2	56484	970	ENSMUSG00000048756	Foxo3	forkhead box O3	215951;56484	202780;0	gene_body	chr10:42275636-42275785	Foxo3	Tet
chr10	42838848	42839117	270	*	Distal Intergenic	10	42860370	42960780	100411	1	268297	-21253	ENSMUSG00000044770	Scml4	Scm polycomb group protein like 4	140740;268297	77352;0	Distal Intergenic	chr10:42838848-42839117	Scml4	Tet
chr10	42862372	42862655	284	*	Exon (ENSMUST00000217505.1/ENSMUST00000217505.1, exon 2 of 2)	10	42860370	42960780	100411	1	268297	2002	ENSMUSG00000044770	Scml4	Scm polycomb group protein like 4	140740;268297	100876;0	gene_body	chr10:42862372-42862655	Scml4	Tet
chr10	42893142	42893340	199	*	Intron (ENSMUST00000063063.13/268297, intron 1 of 8)	10	42860370	42960780	100411	1	268297	32772	ENSMUSG00000044770	Scml4	Scm polycomb group protein like 4	268297	0	gene_body	chr10:42893142-42893340	Scml4	Tet
chr10	42897698	42897974	277	*	Intron (ENSMUST00000063063.13/268297, intron 1 of 8)	10	42860370	42960780	100411	1	268297	37328	ENSMUSG00000044770	Scml4	Scm polycomb group protein like 4	268297	0	gene_body	chr10:42897698-42897974	Scml4	Tet
chr10	42897706	42897941	236	*	Intron (ENSMUST00000063063.13/268297, intron 1 of 8)	10	42860370	42960780	100411	1	268297	37336	ENSMUSG00000044770	Scml4	Scm polycomb group protein like 4	268297	0	gene_body	chr10:42897706-42897941	Scml4	Tet
chr10	42962194	42962496	303	*	Downstream (1-2kb)	10	42860370	42960780	100411	1	268297	101824	ENSMUSG00000044770	Scml4	Scm polycomb group protein like 4	109205;268297	212034;0	gene_body	chr10:42962194-42962496	Scml4	Tet
chr10	42962738	42962925	188	*	Downstream (1-2kb)	10	42860370	42960780	100411	1	268297	102368	ENSMUSG00000044770	Scml4	Scm polycomb group protein like 4	109205;268297	211605;0	gene_body	chr10:42962738-42962925	Scml4	Tet
chr10	43479771	43480181	411	*	Promoter (<=1kb)	10	43478831	43515396	36566	1	331623	940	ENSMUSG00000038214	Bend3	BEN domain containing 3	331623;67851;71365	0;0;258285	gene_body	chr10:43479771-43480181	Bend3	Tet
chr10	43479743	43480142	400	*	Promoter (<=1kb)	10	43478831	43515396	36566	1	331623	912	ENSMUSG00000038214	Bend3	BEN domain containing 3	331623;67851;71365	0;0;258257	gene_body	chr10:43479743-43480142	Bend3	Tet
chr10	43479689	43480119	431	*	Promoter (<=1kb)	10	43478831	43515396	36566	1	331623	858	ENSMUSG00000038214	Bend3	BEN domain containing 3	331623;67851;71365	0;0;258203	gene_body	chr10:43479689-43480119	Bend3	Tet
chr10	43479817	43480102	286	*	Promoter (<=1kb)	10	43478831	43515396	36566	1	331623	986	ENSMUSG00000038214	Bend3	BEN domain containing 3	331623;67851;71365	0;0;258331	gene_body	chr10:43479817-43480102	Bend3	Tet
chr10	43540582	43540737	156	*	Promoter (<=1kb)	10	43525133	43540994	15862	2	67851	257	ENSMUSG00000019797	Mtres1	mitochondrial transcription rescue factor 1	12484;331623;67851	-38432;0;0	gene_body	chr10:43540582-43540737	Mtres1	Tet
chr10	43740216	43740754	539	*	Exon (ENSMUST00000214129.1/ENSMUST00000214129.1, exon 3 of 3)	10	43745809	43765836	20028	1	69443	-5055	ENSMUSG00000111422	1700027J07Rik	RIKEN cDNA 1700027J07 gene	414125;69443	146819;-5055	gene_body	chr10:43740216-43740754	1700027J07Rik	Tet
chr10	43740288	43740710	423	*	Exon (ENSMUST00000214129.1/ENSMUST00000214129.1, exon 3 of 3)	10	43745809	43765836	20028	1	69443	-5099	ENSMUSG00000111422	1700027J07Rik	RIKEN cDNA 1700027J07 gene	414125;69443	146891;-5099	gene_body	chr10:43740288-43740710	1700027J07Rik	Tet
chr10	43997298	43997610	313	*	Exon (ENSMUST00000200401.1/11630, exon 4 of 22)	10	43901807	43947862	46056	1	170728	95491	ENSMUSG00000019864	Rtn4ip1	reticulon 4 interacting protein 1	11630;170728	0;95491	gene_body	chr10:43997298-43997610	Rtn4ip1	Tet
chr10	43997333	43997555	223	*	Exon (ENSMUST00000200401.1/11630, exon 4 of 22)	10	43901807	43947862	46056	1	170728	95526	ENSMUSG00000019864	Rtn4ip1	reticulon 4 interacting protein 1	11630;170728	0;95526	gene_body	chr10:43997333-43997555	Rtn4ip1	Tet
chr10	44380682	44381133	452	*	Distal Intergenic	10	44359676	44359768	93	1	100316688	21006	ENSMUSG00000089260	Mir1929	microRNA 1929	100316688;11793	21006;112324	Distal Intergenic	chr10:44380682-44381133	Mir1929	Tet
chr10	44444574	44444766	193	*	Intron (ENSMUST00000039174.10/12142, intron 5 of 7)	10	44437177	44528501	91325	2	12142	83735	ENSMUSG00000038151	Prdm1	PR domain containing 1, with ZNF domain	12142	0	gene_body	chr10:44444574-44444766	Prdm1	Tet
chr10	44447411	44447589	179	*	Intron (ENSMUST00000039174.10/12142, intron 4 of 7)	10	44437177	44528501	91325	2	12142	80912	ENSMUSG00000038151	Prdm1	PR domain containing 1, with ZNF domain	12142	0	gene_body	chr10:44447411-44447589	Prdm1	Tet
chr10	44448190	44448438	249	*	Intron (ENSMUST00000039174.10/12142, intron 4 of 7)	10	44437177	44528501	91325	2	12142	80063	ENSMUSG00000038151	Prdm1	PR domain containing 1, with ZNF domain	12142	0	gene_body	chr10:44448190-44448438	Prdm1	Tet
chr10	44449788	44449965	178	*	Intron (ENSMUST00000039174.10/12142, intron 4 of 7)	10	44437177	44528501	91325	2	12142	78536	ENSMUSG00000038151	Prdm1	PR domain containing 1, with ZNF domain	12142	0	gene_body	chr10:44449788-44449965	Prdm1	Tet
chr10	45001069	45001236	168	*	Distal Intergenic	10	45067203	45167198	99996	1	19072	-65967	ENSMUSG00000019849	Prep	prolyl endopeptidase			Distal Intergenic	chr10:45001069-45001236	Prep	Tet
chr10	45020391	45020540	150	*	Distal Intergenic	10	45067203	45167198	99996	1	19072	-46663	ENSMUSG00000019849	Prep	prolyl endopeptidase	19072	-46663	Distal Intergenic	chr10:45020391-45020540	Prep	Tet
chr10	53348388	53348662	275	*	Exon (ENSMUST00000220443.1/100038725, exon 3 of 13)	10	53337667	53345987	8321	1	18821	10721	ENSMUSG00000038583	Pln	phospholamban	100038725;18821	0;10721	gene_body	chr10:53348388-53348662	Pln	Tet
chr10	53348474	53348695	222	*	Exon (ENSMUST00000220443.1/100038725, exon 3 of 13)	10	53337667	53345987	8321	1	18821	10807	ENSMUSG00000038583	Pln	phospholamban	100038725;18821	0;10807	gene_body	chr10:53348474-53348695	Pln	Tet
chr10	53525465	53525996	532	*	Distal Intergenic	10	53498443	53518989	20547	2	100502868	-6476	ENSMUSG00000112739	Gm20597	predicted gene, 20597	100502868;71567	-6476;0	Distal Intergenic	chr10:53525465-53525996	Gm20597	Tet
chr10	53629282	53629609	328	*	Promoter (<=1kb)	10	53536315	53630439	94125	2	71567	830	ENSMUSG00000058298	Mcm9	minichromosome maintenance 9 homologous recombination repair factor	66403;71567;75906	32525;0;121514	gene_body	chr10:53629282-53629609	Mcm9	Tet
chr10	53629449	53629739	291	*	Promoter (<=1kb)	10	53536315	53630439	94125	2	71567	700	ENSMUSG00000058298	Mcm9	minichromosome maintenance 9 homologous recombination repair factor	66403;71567;75906	32692;0;121384	gene_body	chr10:53629449-53629739	Mcm9	Tet
chr10	53629329	53629570	242	*	Promoter (<=1kb)	10	53536315	53630439	94125	2	71567	869	ENSMUSG00000058298	Mcm9	minichromosome maintenance 9 homologous recombination repair factor	66403;71567;75906	32572;0;121553	gene_body	chr10:53629329-53629570	Mcm9	Tet
chr10	53629329	53629559	231	*	Promoter (<=1kb)	10	53536315	53630439	94125	2	71567	880	ENSMUSG00000058298	Mcm9	minichromosome maintenance 9 homologous recombination repair factor	66403;71567;75906	32572;0;121564	gene_body	chr10:53629329-53629559	Mcm9	Tet
chr10	54026690	54027142	453	*	Intron (ENSMUST00000003843.15/17155, intron 3 of 12)	10	54075922	54081081	5160	1	100502920	-48780	ENSMUSG00000097069	Gm16998	predicted gene, 16998	100502920;17155	-48780;0	gene_body	chr10:54026690-54027142	Gm16998	Tet
chr10	54040366	54040825	460	*	Intron (ENSMUST00000003843.15/17155, intron 2 of 12)	10	54075922	54081081	5160	1	100502920	-35097	ENSMUSG00000097069	Gm16998	predicted gene, 16998	100502920;17155	-35097;0	gene_body	chr10:54040366-54040825	Gm16998	Tet
chr10	54117881	54118134	254	*	Distal Intergenic	10	53904785	54076609	171825	2	17155	-41272	ENSMUSG00000003746	Man1a	mannosidase 1, alpha	100502920;17155	41959;0	Distal Intergenic	chr10:54117881-54118134	Man1a	Tet
chr10	54254912	54255443	532	*	Distal Intergenic	10	53904785	54076609	171825	2	17155	-178303	ENSMUSG00000003746	Man1a	mannosidase 1, alpha			Distal Intergenic	chr10:54254912-54255443	Man1a	Tet
chr10	56115206	56115470	265	*	Exon (ENSMUST00000063138.7/73390, exon 2 of 2)	10	56106917	56116880	9964	1	73390	8289	ENSMUSG00000047669	Msl3l2	MSL3 like 2	544696;73390	0;0	gene_body	chr10:56115206-56115470	Msl3l2	Tet
chr10	57747226	57747456	231	*	Distal Intergenic	10	57784881	57788450	3570	1	12140	-37425	ENSMUSG00000019874	Fabp7	fatty acid binding protein 7, brain	12140;18768;57319	-37425;115245;0	Distal Intergenic	chr10:57747226-57747456	Fabp7	Tet
chr10	57753435	57753690	256	*	Distal Intergenic	10	57784881	57788450	3570	1	12140	-31191	ENSMUSG00000019874	Fabp7	fatty acid binding protein 7, brain	12140;18768;57319	-31191;121454;0	Distal Intergenic	chr10:57753435-57753690	Fabp7	Tet
chr10	57753458	57753674	217	*	Distal Intergenic	10	57784881	57788450	3570	1	12140	-31207	ENSMUSG00000019874	Fabp7	fatty acid binding protein 7, brain	12140;18768;57319	-31207;121477;0	Distal Intergenic	chr10:57753458-57753674	Fabp7	Tet
chr10	57753489	57753638	150	*	Distal Intergenic	10	57784881	57788450	3570	1	12140	-31243	ENSMUSG00000019874	Fabp7	fatty acid binding protein 7, brain	12140;18768;57319	-31243;121508;0	Distal Intergenic	chr10:57753489-57753638	Fabp7	Tet
chr10	57794843	57795022	180	*	Promoter (<=1kb)	10	57794335	57811830	17496	1	57319	508	ENSMUSG00000019872	Smpdl3a	sphingomyelin phosphodiesterase, acid-like 3A	12140;57319	9962;0	gene_body	chr10:57794843-57795022	Smpdl3a	Tet
chr10	58351744	58351939	196	*	Intron (ENSMUST00000020078.13/110829, intron 1 of 9)	10	58323466	58424691	101226	1	110829	28278	ENSMUSG00000019920	Lims1	LIM and senescent cell antigen-like domains 1	110829;70297	0;96247	gene_body	chr10:58351744-58351939	Lims1	Tet
chr10	58351623	58351933	311	*	Intron (ENSMUST00000020078.13/110829, intron 1 of 9)	10	58323466	58424691	101226	1	110829	28157	ENSMUSG00000019920	Lims1	LIM and senescent cell antigen-like domains 1	110829;70297	0;96126	gene_body	chr10:58351623-58351933	Lims1	Tet
chr10	58383364	58383661	298	*	Intron (ENSMUST00000020078.13/110829, intron 1 of 9)	10	58323466	58424691	101226	1	110829	59898	ENSMUSG00000019920	Lims1	LIM and senescent cell antigen-like domains 1	110829	0	gene_body	chr10:58383364-58383661	Lims1	Tet
chr10	59323713	59323862	150	*	Promoter (<=1kb)	10	59323296	59373304	50009	1	18451	417	ENSMUSG00000019916	P4ha1	procollagen-proline, 2-oxoglutarate 4-dioxygenase (proline 4-hydroxylase), alpha 1 polypeptide	18451	0	gene_body	chr10:59323713-59323862	P4ha1	Tet
chr10	59380421	59380570	150	*	Distal Intergenic	10	59403660	59421976	18317	1	69836	-23090	ENSMUSG00000009646	Pla2g12b	phospholipase A2, group XIIB	18302;18451;69836	61208;0;-23090	Distal Intergenic	chr10:59380421-59380570	Pla2g12b	Tet
chr10	59381770	59382011	242	*	Distal Intergenic	10	59403660	59421976	18317	1	69836	-21649	ENSMUSG00000009646	Pla2g12b	phospholipase A2, group XIIB	18302;18451;69836	59767;0;-21649	Distal Intergenic	chr10:59381770-59382011	Pla2g12b	Tet
chr10	59381758	59382043	286	*	Distal Intergenic	10	59403660	59421976	18317	1	69836	-21617	ENSMUSG00000009646	Pla2g12b	phospholipase A2, group XIIB	18302;18451;69836	59735;0;-21617	Distal Intergenic	chr10:59381758-59382043	Pla2g12b	Tet
chr10	59382940	59383117	178	*	Distal Intergenic	10	59403660	59421976	18317	1	69836	-20543	ENSMUSG00000009646	Pla2g12b	phospholipase A2, group XIIB	18302;18451;69836	58661;0;-20543	Distal Intergenic	chr10:59382940-59383117	Pla2g12b	Tet
chr10	59511632	59512041	410	*	Intron (ENSMUST00000020312.12/215999, intron 1 of 7)	10	59422958	59441778	18821	2	18302	-69854	ENSMUSG00000009654	Oit3	oncoprotein induced transcript 3	215999	0	gene_body	chr10:59511632-59512041	Oit3	Tet
chr10	59577867	59578415	549	*	Intron (ENSMUST00000020312.12/215999, intron 1 of 7)	10	59446984	59616692	169709	2	215999	38277	ENSMUSG00000009647	Mcu	mitochondrial calcium uniporter	215999	0	gene_body	chr10:59577867-59578415	Mcu	Tet
chr10	59577799	59578406	608	*	Intron (ENSMUST00000020312.12/215999, intron 1 of 7)	10	59446984	59616692	169709	2	215999	38286	ENSMUSG00000009647	Mcu	mitochondrial calcium uniporter	215999	0	gene_body	chr10:59577799-59578406	Mcu	Tet
chr10	59577962	59578165	204	*	Intron (ENSMUST00000020312.12/215999, intron 1 of 7)	10	59446984	59616692	169709	2	215999	38527	ENSMUSG00000009647	Mcu	mitochondrial calcium uniporter	215999	0	gene_body	chr10:59577962-59578165	Mcu	Tet
chr10	59589403	59589680	278	*	Intron (ENSMUST00000020312.12/215999, intron 1 of 7)	10	59446984	59616692	169709	2	215999	27012	ENSMUSG00000009647	Mcu	mitochondrial calcium uniporter	215999	0	gene_body	chr10:59589403-59589680	Mcu	Tet
chr10	59589487	59589701	215	*	Intron (ENSMUST00000020312.12/215999, intron 1 of 7)	10	59446984	59616692	169709	2	215999	26991	ENSMUSG00000009647	Mcu	mitochondrial calcium uniporter	215999	0	gene_body	chr10:59589487-59589701	Mcu	Tet
chr10	59865164	59865398	235	*	Downstream (1-2kb)	10	59879556	59899302	19747	1	56709	-14158	ENSMUSG00000020109	Dnajb12	DnaJ heat shock protein family (Hsp40) member B12	216001;56709	162687;-14158	gene_body	chr10:59865164-59865398	Dnajb12	Tet
chr10	59865142	59865320	179	*	Downstream (1-2kb)	10	59879556	59899302	19747	1	56709	-14236	ENSMUSG00000020109	Dnajb12	DnaJ heat shock protein family (Hsp40) member B12	216001;56709	162665;-14236	gene_body	chr10:59865142-59865320	Dnajb12	Tet
chr10	59865158	59865312	155	*	Downstream (1-2kb)	10	59879556	59899302	19747	1	56709	-14244	ENSMUSG00000020109	Dnajb12	DnaJ heat shock protein family (Hsp40) member B12	216001;56709	162681;-14244	gene_body	chr10:59865158-59865312	Dnajb12	Tet
chr10	59899571	59899965	395	*	Downstream (<1kb)	10	59879556	59899302	19747	1	56709	20015	ENSMUSG00000020109	Dnajb12	DnaJ heat shock protein family (Hsp40) member B12	216001;56709;74747	197094;20015;51869	gene_body	chr10:59899571-59899965	Dnajb12	Tet
chr10	59899615	59900014	400	*	Downstream (<1kb)	10	59879556	59899302	19747	1	56709	20059	ENSMUSG00000020109	Dnajb12	DnaJ heat shock protein family (Hsp40) member B12	216001;56709;74747	197138;20059;51820	gene_body	chr10:59899615-59900014	Dnajb12	Tet
chr10	59899604	59899986	383	*	Downstream (<1kb)	10	59879556	59899302	19747	1	56709	20048	ENSMUSG00000020109	Dnajb12	DnaJ heat shock protein family (Hsp40) member B12	216001;56709;74747	197127;20048;51848	gene_body	chr10:59899604-59899986	Dnajb12	Tet
chr10	59899637	59899963	327	*	Downstream (<1kb)	10	59879556	59899302	19747	1	56709	20081	ENSMUSG00000020109	Dnajb12	DnaJ heat shock protein family (Hsp40) member B12	216001;56709;74747	197160;20081;51871	gene_body	chr10:59899637-59899963	Dnajb12	Tet
chr10	59907832	59908375	544	*	Distal Intergenic	10	59879556	59899302	19747	1	56709	28276	ENSMUSG00000020109	Dnajb12	DnaJ heat shock protein family (Hsp40) member B12	216001;56709;74747	205355;28276;43459	Distal Intergenic	chr10:59907832-59908375	Dnajb12	Tet
chr10	59907877	59908283	407	*	Distal Intergenic	10	59879556	59899302	19747	1	56709	28321	ENSMUSG00000020109	Dnajb12	DnaJ heat shock protein family (Hsp40) member B12	216001;56709;74747	205400;28321;43551	Distal Intergenic	chr10:59907877-59908283	Dnajb12	Tet
chr10	59911198	59911361	164	*	Distal Intergenic	10	59879556	59899302	19747	1	56709	31642	ENSMUSG00000020109	Dnajb12	DnaJ heat shock protein family (Hsp40) member B12	216001;56709;74747	208721;31642;40473	Distal Intergenic	chr10:59911198-59911361	Dnajb12	Tet
chr10	59964543	59965243	701	*	Distal Intergenic	10	59949669	59951834	2166	2	74747	-12709	ENSMUSG00000020108	Ddit4	DNA-damage-inducible transcript 4	52717;69090;74747	37892;0;-12709	Distal Intergenic	chr10:59964543-59965243	Ddit4	Tet
chr10	59974168	59974549	382	*	Distal Intergenic	10	59949669	59951834	2166	2	74747	-22334	ENSMUSG00000020108	Ddit4	DNA-damage-inducible transcript 4	52717;69090;74747	28586;0;-22334	Distal Intergenic	chr10:59974168-59974549	Ddit4	Tet
chr10	59974200	59974600	401	*	Distal Intergenic	10	59949669	59951834	2166	2	74747	-22366	ENSMUSG00000020108	Ddit4	DNA-damage-inducible transcript 4	52717;69090;74747	28535;0;-22366	Distal Intergenic	chr10:59974200-59974600	Ddit4	Tet
chr10	60028320	60028500	181	*	Intron (ENSMUST00000050516.13/69090, intron 5 of 10)	10	59987409	60003135	15727	2	52717	-25185	ENSMUSG00000020107	Anapc16	anaphase promoting complex subunit 16	52717;69090	-25185;0	gene_body	chr10:60028320-60028500	Anapc16	Tet
chr10	60028285	60028517	233	*	Intron (ENSMUST00000050516.13/69090, intron 5 of 10)	10	59987409	60003135	15727	2	52717	-25150	ENSMUSG00000020107	Anapc16	anaphase promoting complex subunit 16	52717;69090	-25150;0	gene_body	chr10:60028285-60028517	Anapc16	Tet
chr10	60081159	60081845	687	*	Intron (ENSMUST00000050516.13/69090, intron 9 of 10)	10	60106219	60135198	28980	1	94214	-24374	ENSMUSG00000058297	Spock2	sparc/osteonectin, cwcv and kazal-like domains proteoglycan 2	102465546;69090;94214	-44931;0;0	gene_body	chr10:60081159-60081845	Spock2	Tet
chr10	60081143	60081704	562	*	Intron (ENSMUST00000050516.13/69090, intron 9 of 10)	10	60106219	60135198	28980	1	94214	-24515	ENSMUSG00000058297	Spock2	sparc/osteonectin, cwcv and kazal-like domains proteoglycan 2	102465546;69090;94214	-45072;0;0	gene_body	chr10:60081143-60081704	Spock2	Tet
chr10	60106847	60107068	222	*	Promoter (<=1kb)	10	60106219	60135198	28980	1	94214	628	ENSMUSG00000058297	Spock2	sparc/osteonectin, cwcv and kazal-like domains proteoglycan 2	102465546;69090;94214	-19708;0;0	gene_body	chr10:60106847-60107068	Spock2	Tet
chr10	60106825	60107245	421	*	Promoter (<=1kb)	10	60106219	60135198	28980	1	94214	606	ENSMUSG00000058297	Spock2	sparc/osteonectin, cwcv and kazal-like domains proteoglycan 2	102465546;69090;94214	-19531;0;0	gene_body	chr10:60106825-60107245	Spock2	Tet
chr10	60138852	60139001	150	*	Distal Intergenic	10	60126776	60126833	58	1	102465546	12076	ENSMUSG00000105468	Mir6906	microRNA 6906	102465546;53374;69090;94214	12076;0;0;0	Distal Intergenic	chr10:60138852-60139001	Mir6906	Tet
chr10	60218832	60219050	219	*	Promoter (<=1kb)	10	60181532	60219260	37729	2	53374	210	ENSMUSG00000057337	Chst3	carbohydrate sulfotransferase 3	53374	0	gene_body	chr10:60218832-60219050	Chst3	Tet
chr10	60350428	60350577	150	*	Intron (ENSMUST00000020301.13/74048, intron 1 of 6)	10	60346851	60372684	25834	1	74048	3577	ENSMUSG00000020101	Vsir	V-set immunoregulatory receptor	100302688;19156;22295;74048	-49149;72801;0;0	gene_body	chr10:60350428-60350577	Vsir	Tet
chr10	60350893	60351097	205	*	Intron (ENSMUST00000020301.13/74048, intron 1 of 6)	10	60346851	60372684	25834	1	74048	4042	ENSMUSG00000020101	Vsir	V-set immunoregulatory receptor	100302688;19156;22295;74048	-48629;73266;0;0	gene_body	chr10:60350893-60351097	Vsir	Tet
chr10	60351825	60352280	456	*	Intron (ENSMUST00000020301.13/74048, intron 1 of 6)	10	60346851	60372684	25834	1	74048	4974	ENSMUSG00000020101	Vsir	V-set immunoregulatory receptor	100302688;19156;22295;74048	-47446;74198;0;0	gene_body	chr10:60351825-60352280	Vsir	Tet
chr10	60351881	60352227	347	*	Intron (ENSMUST00000020301.13/74048, intron 1 of 6)	10	60346851	60372684	25834	1	74048	5030	ENSMUSG00000020101	Vsir	V-set immunoregulatory receptor	100302688;19156;22295;74048	-47499;74254;0;0	gene_body	chr10:60351881-60352227	Vsir	Tet
chr10	60351838	60352171	334	*	Intron (ENSMUST00000020301.13/74048, intron 1 of 6)	10	60346851	60372684	25834	1	74048	4987	ENSMUSG00000020101	Vsir	V-set immunoregulatory receptor	100302688;19156;22295;74048	-47555;74211;0;0	gene_body	chr10:60351838-60352171	Vsir	Tet
chr10	60389589	60389898	310	*	Intron (ENSMUST00000073242.10/22295, intron 28 of 66)	10	60399726	60403559	3834	1	100302688	-9828	ENSMUSG00000090439	Gm17455	predicted gene, 17455	100302688;22295;74048	-9828;0;0	gene_body	chr10:60389589-60389898	Gm17455	Tet
chr10	60389649	60389837	189	*	Intron (ENSMUST00000073242.10/22295, intron 28 of 66)	10	60399726	60403559	3834	1	100302688	-9889	ENSMUSG00000090439	Gm17455	predicted gene, 17455	100302688;22295;74048	-9889;0;0	gene_body	chr10:60389649-60389837	Gm17455	Tet
chr10	60389619	60389779	161	*	Intron (ENSMUST00000073242.10/22295, intron 28 of 66)	10	60399726	60403559	3834	1	100302688	-9947	ENSMUSG00000090439	Gm17455	predicted gene, 17455	100302688;22295;74048	-9947;0;0	gene_body	chr10:60389619-60389779	Gm17455	Tet
chr10	60760471	60760795	325	*	Distal Intergenic	10	60712072	60752794	40723	2	71279	-7677	ENSMUSG00000020100	Slc29a3	solute carrier family 29 (nucleoside transporters), member 3	107449;71279	70786;-7677	Distal Intergenic	chr10:60760471-60760795	Slc29a3	Tet
chr10	60760514	60760770	257	*	Distal Intergenic	10	60712072	60752794	40723	2	71279	-7720	ENSMUSG00000020100	Slc29a3	solute carrier family 29 (nucleoside transporters), member 3	107449;71279	70811;-7720	Distal Intergenic	chr10:60760514-60760770	Slc29a3	Tet
chr10	61146229	61146597	369	*	Promoter (1-2kb)	10	61098642	61147703	49062	2	20397	1106	ENSMUSG00000020097	Sgpl1	sphingosine phosphate lyase 1	20397;65971	0;-25357	gene_body	chr10:61146229-61146597	Sgpl1	Tet
chr10	61146326	61146610	285	*	Promoter (1-2kb)	10	61098642	61147703	49062	2	20397	1093	ENSMUSG00000020097	Sgpl1	sphingosine phosphate lyase 1	20397;65971	0;-25344	gene_body	chr10:61146326-61146610	Sgpl1	Tet
chr10	62506278	62506564	287	*	Intron (ENSMUST00000160987.7/19073, intron 2 of 3)	10	62455235	62486805	31571	2	30930	-19473	ENSMUSG00000020078	Vps26a	VPS26 retromer complex component A	19073;30930;72320	0;-19473;0	gene_body	chr10:62506278-62506564	Vps26a	Tet
chr10	62543419	62543975	557	*	Intron (ENSMUST00000159704.7/72320, intron 7 of 7)	10	62493833	62527451	33619	2	19073	-15968	ENSMUSG00000020077	Srgn	serglycin	19073;56200;72320	0;58306;0	gene_body	chr10:62543419-62543975	Srgn	Tet
chr10	62543442	62543841	400	*	Intron (ENSMUST00000159704.7/72320, intron 7 of 7)	10	62493833	62527451	33619	2	19073	-15991	ENSMUSG00000020077	Srgn	serglycin	19073;56200;72320	0;58440;0	gene_body	chr10:62543442-62543841	Srgn	Tet
chr10	62543454	62543802	349	*	Intron (ENSMUST00000159704.7/72320, intron 7 of 7)	10	62493833	62527451	33619	2	19073	-16003	ENSMUSG00000020077	Srgn	serglycin	19073;56200;72320	0;58479;0	gene_body	chr10:62543454-62543802	Srgn	Tet
chr10	62543636	62543807	172	*	Intron (ENSMUST00000159704.7/72320, intron 7 of 7)	10	62493833	62527451	33619	2	19073	-16185	ENSMUSG00000020077	Srgn	serglycin	19073;56200;72320	0;58474;0	gene_body	chr10:62543636-62543807	Srgn	Tet
chr10	62553574	62553835	262	*	Intron (ENSMUST00000159704.7/72320, intron 7 of 7)	10	62538626	62578457	39832	2	72320	24622	ENSMUSG00000036955	Kifbp	kinesin family binding protein	19073;56200;72320	0;48446;0	gene_body	chr10:62553574-62553835	Kifbp	Tet
chr10	62665032	62665253	222	*	Exon (ENSMUST00000133371.7/216021, exon 3 of 4)	10	62615895	62651218	35324	2	94213	-13814	ENSMUSG00000020076	Ddx50	DExD box helicase 50	102465987;216021;94213	-17255;0;-13814	gene_body	chr10:62665032-62665253	Ddx50	Tet
chr10	62664944	62665229	286	*	Exon (ENSMUST00000133371.7/216021, exon 3 of 4)	10	62615895	62651218	35324	2	94213	-13726	ENSMUSG00000020076	Ddx50	DExD box helicase 50	102465987;216021;94213	-17279;0;-13726	gene_body	chr10:62664944-62665229	Ddx50	Tet
chr10	66864205	66864845	641	*	Distal Intergenic	10	66912489	66920258	7770	2	68488	55413		1110002J07Rik	RIKEN cDNA 1110002J07 gene	68488	55413	Distal Intergenic	chr10:66864205-66864845	1110002J07Rik	Tet
chr10	66864318	66864791	474	*	Distal Intergenic	10	66912489	66920258	7770	2	68488	55467		1110002J07Rik	RIKEN cDNA 1110002J07 gene	68488	55467	Distal Intergenic	chr10:66864318-66864791	1110002J07Rik	Tet
chr10	66864479	66864819	341	*	Distal Intergenic	10	66912489	66920258	7770	2	68488	55439		1110002J07Rik	RIKEN cDNA 1110002J07 gene	68488	55439	Distal Intergenic	chr10:66864479-66864819	1110002J07Rik	Tet
chr10	66953301	66953603	303	*	Distal Intergenic	10	66912489	66920258	7770	2	68488	-33043		1110002J07Rik	RIKEN cDNA 1110002J07 gene	68488	-33043	Distal Intergenic	chr10:66953301-66953603	1110002J07Rik	Tet
chr10	66953927	66954089	163	*	Distal Intergenic	10	66912489	66920258	7770	2	68488	-33669		1110002J07Rik	RIKEN cDNA 1110002J07 gene	68488	-33669	Distal Intergenic	chr10:66953927-66954089	1110002J07Rik	Tet
chr10	66955500	66955682	183	*	Distal Intergenic	10	66912489	66920258	7770	2	68488	-35242		1110002J07Rik	RIKEN cDNA 1110002J07 gene	102634101;68488	-49338;-35242	Distal Intergenic	chr10:66955500-66955682	1110002J07Rik	Tet
chr10	66956807	66957011	205	*	Distal Intergenic	10	66912489	66920258	7770	2	68488	-36549		1110002J07Rik	RIKEN cDNA 1110002J07 gene	102634101;68488	-48009;-36549	Distal Intergenic	chr10:66956807-66957011	1110002J07Rik	Tet
chr10	67100297	67100674	378	*	Intron (ENSMUST00000174062.7/108829, intron 1 of 2)	10	67009189	67096945	87757	2	28193	-3352	ENSMUSG00000019873	Reep3	receptor accessory protein 3	108829;28193	0;-3352	gene_body	chr10:67100297-67100674	Reep3	Tet
chr10	67100859	67101096	238	*	Intron (ENSMUST00000174062.7/108829, intron 1 of 2)	10	67009189	67096945	87757	2	28193	-3914	ENSMUSG00000019873	Reep3	receptor accessory protein 3	108829;28193	0;-3914	gene_body	chr10:67100859-67101096	Reep3	Tet
chr10	67100445	67100607	163	*	Intron (ENSMUST00000174062.7/108829, intron 1 of 2)	10	67009189	67096945	87757	2	28193	-3500	ENSMUSG00000019873	Reep3	receptor accessory protein 3	108829;28193	0;-3500	gene_body	chr10:67100445-67100607	Reep3	Tet
chr10	67189171	67189334	164	*	Exon (ENSMUST00000219563.1/ENSMUST00000219563.1, exon 1 of 1)	10	67009189	67096945	87757	2	28193	-92226	ENSMUSG00000019873	Reep3	receptor accessory protein 3	108829	0	gene_body	chr10:67189171-67189334	Reep3	Tet
chr10	67284804	67284966	163	*	Promoter (<=1kb)	10	67266689	67285305	18617	2	641340	339	ENSMUSG00000075000	Nrbf2	nuclear receptor binding factor 2	108829;641340	0;0	gene_body	chr10:67284804-67284966	Nrbf2	Tet
chr10	67483481	67483707	227	*	Distal Intergenic	10	67535475	67542188	6714	1	13654	-51768	ENSMUSG00000037868	Egr2	early growth response 2			Distal Intergenic	chr10:67483481-67483707	Egr2	Tet
chr10	67487603	67487826	224	*	Distal Intergenic	10	67535475	67542188	6714	1	13654	-47649	ENSMUSG00000037868	Egr2	early growth response 2	13654	-47649	Distal Intergenic	chr10:67487603-67487826	Egr2	Tet
chr10	67503536	67503963	428	*	Distal Intergenic	10	67535475	67542188	6714	1	13654	-31512	ENSMUSG00000037868	Egr2	early growth response 2	13654;211488	-31512;45105	Distal Intergenic	chr10:67503536-67503963	Egr2	Tet
chr10	67566117	67566441	325	*	Distal Intergenic	10	67569018	67571959	2942	2	105245193	5518		4930563J15Rik	RIKEN cDNA 4930563J15 gene	105245193;13654;211488	5518;30642;-17049	Distal Intergenic	chr10:67566117-67566441	4930563J15Rik	Tet
chr10	67585950	67586613	664	*	Exon (ENSMUST00000218174.1/ENSMUST00000218174.1, exon 4 of 4)	10	67569018	67571959	2942	2	105245193	-13991		4930563J15Rik	RIKEN cDNA 4930563J15 gene	105245193;13654;211488	-13991;50475;-36882	gene_body	chr10:67585950-67586613	4930563J15Rik	Tet
chr10	67586120	67586508	389	*	Exon (ENSMUST00000218174.1/ENSMUST00000218174.1, exon 4 of 4)	10	67569018	67571959	2942	2	105245193	-14161		4930563J15Rik	RIKEN cDNA 4930563J15 gene	105245193;13654;211488	-14161;50645;-37052	gene_body	chr10:67586120-67586508	4930563J15Rik	Tet
chr10	67586320	67586508	189	*	Exon (ENSMUST00000218174.1/ENSMUST00000218174.1, exon 4 of 4)	10	67569018	67571959	2942	2	105245193	-14361		4930563J15Rik	RIKEN cDNA 4930563J15 gene	105245193;13654;211488	-14361;50845;-37252	gene_body	chr10:67586320-67586508	4930563J15Rik	Tet
chr10	67643670	67643862	193	*	Distal Intergenic	10	67569018	67571959	2942	2	105245193	-71711		4930563J15Rik	RIKEN cDNA 4930563J15 gene			Distal Intergenic	chr10:67643670-67643862	4930563J15Rik	Tet
chr10	67647284	67647455	172	*	Distal Intergenic	10	67569018	67571959	2942	2	105245193	-75325		4930563J15Rik	RIKEN cDNA 4930563J15 gene			Distal Intergenic	chr10:67647284-67647455	4930563J15Rik	Tet
chr10	67697874	67698197	324	*	Distal Intergenic	10	67569018	67571959	2942	2	105245193	-125915		4930563J15Rik	RIKEN cDNA 4930563J15 gene			Distal Intergenic	chr10:67697874-67698197	4930563J15Rik	Tet
chr10	67697891	67698164	274	*	Distal Intergenic	10	67569018	67571959	2942	2	105245193	-125932		4930563J15Rik	RIKEN cDNA 4930563J15 gene			Distal Intergenic	chr10:67697891-67698164	4930563J15Rik	Tet
chr10	67697876	67698065	190	*	Distal Intergenic	10	67569018	67571959	2942	2	105245193	-125917		4930563J15Rik	RIKEN cDNA 4930563J15 gene			Distal Intergenic	chr10:67697876-67698065	4930563J15Rik	Tet
chr10	68035826	68036245	420	*	Exon (ENSMUST00000118160.7/170799, exon 10 of 12)	10	67979570	68059740	80171	1	170799	56256	ENSMUSG00000037846	Rtkn2	rhotekin 2	170799	0	gene_body	chr10:68035826-68036245	Rtkn2	Tet
chr10	68036460	68036754	295	*	Intron (ENSMUST00000118160.7/170799, intron 10 of 11)	10	67979570	68059740	80171	1	170799	56890	ENSMUSG00000037846	Rtkn2	rhotekin 2	170799	0	gene_body	chr10:68036460-68036754	Rtkn2	Tet
chr10	68039702	68040247	546	*	Exon (ENSMUST00000118160.7/170799, exon 11 of 12)	10	67979570	68059740	80171	1	170799	60132	ENSMUSG00000037846	Rtkn2	rhotekin 2	170799	0	gene_body	chr10:68039702-68040247	Rtkn2	Tet
chr10	68039986	68040202	217	*	Exon (ENSMUST00000118160.7/170799, exon 11 of 12)	10	67979570	68059740	80171	1	170799	60416	ENSMUSG00000037846	Rtkn2	rhotekin 2	170799	0	gene_body	chr10:68039986-68040202	Rtkn2	Tet
chr10	68105310	68105687	378	*	Intron (ENSMUST00000219238.1/71371, intron 8 of 9)	10	67979570	68059740	80171	1	170799	125740	ENSMUSG00000037846	Rtkn2	rhotekin 2	170799;71371	0;0	gene_body	chr10:68105310-68105687	Rtkn2	Tet
chr10	68105329	68105754	426	*	Intron (ENSMUST00000219238.1/71371, intron 8 of 9)	10	67979570	68059740	80171	1	170799	125759	ENSMUSG00000037846	Rtkn2	rhotekin 2	170799;71371	0;0	gene_body	chr10:68105329-68105754	Rtkn2	Tet
chr10	68119308	68119553	246	*	Intron (ENSMUST00000219238.1/71371, intron 7 of 9)	10	67979570	68059740	80171	1	170799	139738	ENSMUSG00000037846	Rtkn2	rhotekin 2	71371	0	gene_body	chr10:68119308-68119553	Rtkn2	Tet
chr10	68119366	68119596	231	*	Intron (ENSMUST00000219238.1/71371, intron 7 of 9)	10	67979570	68059740	80171	1	170799	139796	ENSMUSG00000037846	Rtkn2	rhotekin 2	71371	0	gene_body	chr10:68119366-68119596	Rtkn2	Tet
chr10	68119368	68119532	165	*	Intron (ENSMUST00000219238.1/71371, intron 7 of 9)	10	67979570	68059740	80171	1	170799	139798	ENSMUSG00000037846	Rtkn2	rhotekin 2	71371	0	gene_body	chr10:68119368-68119532	Rtkn2	Tet
chr10	68154001	68154261	261	*	Intron (ENSMUST00000219238.1/71371, intron 4 of 9)	10	68092520	68278740	186221	2	71371	124479	ENSMUSG00000019947	Arid5b	AT rich interactive domain 5B (MRF1-like)	71371	0	gene_body	chr10:68154001-68154261	Arid5b	Tet
chr10	68154025	68154236	212	*	Intron (ENSMUST00000219238.1/71371, intron 4 of 9)	10	68092520	68278740	186221	2	71371	124504	ENSMUSG00000019947	Arid5b	AT rich interactive domain 5B (MRF1-like)	71371	0	gene_body	chr10:68154025-68154236	Arid5b	Tet
chr10	68192781	68193284	504	*	Intron (ENSMUST00000219238.1/71371, intron 3 of 9)	10	68092520	68278740	186221	2	71371	85456	ENSMUSG00000019947	Arid5b	AT rich interactive domain 5B (MRF1-like)	71371	0	gene_body	chr10:68192781-68193284	Arid5b	Tet
chr10	68192859	68193207	349	*	Intron (ENSMUST00000219238.1/71371, intron 3 of 9)	10	68092520	68278740	186221	2	71371	85533	ENSMUSG00000019947	Arid5b	AT rich interactive domain 5B (MRF1-like)	71371	0	gene_body	chr10:68192859-68193207	Arid5b	Tet
chr10	68193068	68193218	151	*	Intron (ENSMUST00000219238.1/71371, intron 3 of 9)	10	68092520	68278740	186221	2	71371	85522	ENSMUSG00000019947	Arid5b	AT rich interactive domain 5B (MRF1-like)	71371	0	gene_body	chr10:68193068-68193218	Arid5b	Tet
chr10	68202014	68202168	155	*	Intron (ENSMUST00000219238.1/71371, intron 3 of 9)	10	68092520	68278740	186221	2	71371	76572	ENSMUSG00000019947	Arid5b	AT rich interactive domain 5B (MRF1-like)	71371	0	gene_body	chr10:68202014-68202168	Arid5b	Tet
chr10	68204554	68204715	162	*	Intron (ENSMUST00000219238.1/71371, intron 3 of 9)	10	68092520	68278740	186221	2	71371	74025	ENSMUSG00000019947	Arid5b	AT rich interactive domain 5B (MRF1-like)	71371	0	gene_body	chr10:68204554-68204715	Arid5b	Tet
chr10	68239079	68239415	337	*	Intron (ENSMUST00000219238.1/71371, intron 3 of 9)	10	68092520	68278740	186221	2	71371	39325	ENSMUSG00000019947	Arid5b	AT rich interactive domain 5B (MRF1-like)	71371	0	gene_body	chr10:68239079-68239415	Arid5b	Tet
chr10	68240562	68240848	287	*	Intron (ENSMUST00000219238.1/71371, intron 3 of 9)	10	68092520	68278740	186221	2	71371	37892	ENSMUSG00000019947	Arid5b	AT rich interactive domain 5B (MRF1-like)	71371	0	gene_body	chr10:68240562-68240848	Arid5b	Tet
chr10	68240901	68241050	150	*	Intron (ENSMUST00000219238.1/71371, intron 3 of 9)	10	68092520	68278740	186221	2	71371	37690	ENSMUSG00000019947	Arid5b	AT rich interactive domain 5B (MRF1-like)	71371	0	gene_body	chr10:68240901-68241050	Arid5b	Tet
chr10	68249476	68249769	294	*	Intron (ENSMUST00000219238.1/71371, intron 2 of 9)	10	68092520	68278740	186221	2	71371	28971	ENSMUSG00000019947	Arid5b	AT rich interactive domain 5B (MRF1-like)	71371	0	gene_body	chr10:68249476-68249769	Arid5b	Tet
chr10	68276432	68276912	481	*	Promoter (1-2kb)	10	68092520	68278740	186221	2	71371	1828	ENSMUSG00000019947	Arid5b	AT rich interactive domain 5B (MRF1-like)	71371;75148	0;44230	gene_body	chr10:68276432-68276912	Arid5b	Tet
chr10	68276971	68277426	456	*	Promoter (1-2kb)	10	68092520	68278740	186221	2	71371	1314	ENSMUSG00000019947	Arid5b	AT rich interactive domain 5B (MRF1-like)	71371;75148	0;43716	gene_body	chr10:68276971-68277426	Arid5b	Tet
chr10	68277726	68277929	204	*	Promoter (<=1kb)	10	68092520	68278740	186221	2	71371	811	ENSMUSG00000019947	Arid5b	AT rich interactive domain 5B (MRF1-like)	71371;75148	0;43213	gene_body	chr10:68277726-68277929	Arid5b	Tet
chr10	68276753	68277426	674	*	Promoter (1-2kb)	10	68092520	68278740	186221	2	71371	1314	ENSMUSG00000019947	Arid5b	AT rich interactive domain 5B (MRF1-like)	71371;75148	0;43716	gene_body	chr10:68276753-68277426	Arid5b	Tet
chr10	68277010	68277218	209	*	Promoter (1-2kb)	10	68092520	68278740	186221	2	71371	1522	ENSMUSG00000019947	Arid5b	AT rich interactive domain 5B (MRF1-like)	71371;75148	0;43924	gene_body	chr10:68277010-68277218	Arid5b	Tet
chr10	68276952	68277311	360	*	Promoter (1-2kb)	10	68092520	68278740	186221	2	71371	1429	ENSMUSG00000019947	Arid5b	AT rich interactive domain 5B (MRF1-like)	71371;75148	0;43831	gene_body	chr10:68276952-68277311	Arid5b	Tet
chr10	68283131	68283403	273	*	Distal Intergenic	10	68092520	68278740	186221	2	71371	-4391	ENSMUSG00000019947	Arid5b	AT rich interactive domain 5B (MRF1-like)	71371;75148	0;37739	Distal Intergenic	chr10:68283131-68283403	Arid5b	Tet
chr10	68283144	68283476	333	*	Distal Intergenic	10	68092520	68278740	186221	2	71371	-4404	ENSMUSG00000019947	Arid5b	AT rich interactive domain 5B (MRF1-like)	71371;75148	0;37666	Distal Intergenic	chr10:68283144-68283476	Arid5b	Tet
chr10	68283159	68283358	200	*	Distal Intergenic	10	68092520	68278740	186221	2	71371	-4419	ENSMUSG00000019947	Arid5b	AT rich interactive domain 5B (MRF1-like)	71371;75148	0;37784	Distal Intergenic	chr10:68283159-68283358	Arid5b	Tet
chr10	68301112	68301279	168	*	Distal Intergenic	10	68319071	68321142	2072	2	75148	19863	ENSMUSG00000112157	4930545H06Rik	RIKEN cDNA 4930545H06 gene	71371;75148	0;19863	Distal Intergenic	chr10:68301112-68301279	4930545H06Rik	Tet
chr10	68541290	68541675	386	*	Promoter (<=1kb)	10	68430953	68541896	110944	2	73287	221	ENSMUSG00000019945	Cabcoco1	ciliary associated calcium binding coiled-coil 1	73287	0	gene_body	chr10:68541290-68541675	Cabcoco1	Tet
chr10	68673500	68674097	598	*	Distal Intergenic	10	68723646	68782650	59005	1	327766	-49549	ENSMUSG00000060044	Tmem26	transmembrane protein 26	327766	0	Distal Intergenic	chr10:68673500-68674097	Tmem26	Tet
chr10	68673523	68673967	445	*	Distal Intergenic	10	68723646	68782650	59005	1	327766	-49679	ENSMUSG00000060044	Tmem26	transmembrane protein 26	327766	0	Distal Intergenic	chr10:68673523-68673967	Tmem26	Tet
chr10	68673538	68673983	446	*	Distal Intergenic	10	68723646	68782650	59005	1	327766	-49663	ENSMUSG00000060044	Tmem26	transmembrane protein 26	327766	0	Distal Intergenic	chr10:68673538-68673983	Tmem26	Tet
chr10	68673602	68674004	403	*	Distal Intergenic	10	68723646	68782650	59005	1	327766	-49642	ENSMUSG00000060044	Tmem26	transmembrane protein 26	327766	0	Distal Intergenic	chr10:68673602-68674004	Tmem26	Tet
chr10	68781572	68781823	252	*	3' UTR	10	68723646	68782650	59005	1	327766	57926	ENSMUSG00000060044	Tmem26	transmembrane protein 26	327766	0	gene_body	chr10:68781572-68781823	Tmem26	Tet
chr10	68795488	68795819	332	*	Distal Intergenic	10	68723646	68782650	59005	1	327766	71842	ENSMUSG00000060044	Tmem26	transmembrane protein 26	327766	0	Distal Intergenic	chr10:68795488-68795819	Tmem26	Tet
chr10	68795498	68795782	285	*	Distal Intergenic	10	68723646	68782650	59005	1	327766	71852	ENSMUSG00000060044	Tmem26	transmembrane protein 26	327766	0	Distal Intergenic	chr10:68795498-68795782	Tmem26	Tet
chr10	70033043	70033310	268	*	Distal Intergenic	10	70097121	70193200	96080	1	76551	-63811	ENSMUSG00000048701	Ccdc6	coiled-coil domain containing 6	11735	634047	Distal Intergenic	chr10:70033043-70033310	Ccdc6	Tet
chr10	70039946	70040258	313	*	Distal Intergenic	10	70097121	70193200	96080	1	76551	-56863	ENSMUSG00000048701	Ccdc6	coiled-coil domain containing 6	11735	640950	Distal Intergenic	chr10:70039946-70040258	Ccdc6	Tet
chr10	70039897	70040129	233	*	Distal Intergenic	10	70097121	70193200	96080	1	76551	-56992	ENSMUSG00000048701	Ccdc6	coiled-coil domain containing 6	11735	640901	Distal Intergenic	chr10:70039897-70040129	Ccdc6	Tet
chr10	70039995	70040189	195	*	Distal Intergenic	10	70097121	70193200	96080	1	76551	-56932	ENSMUSG00000048701	Ccdc6	coiled-coil domain containing 6	11735	640999	Distal Intergenic	chr10:70039995-70040189	Ccdc6	Tet
chr10	70097427	70097577	151	*	Promoter (<=1kb)	10	70097121	70193200	96080	1	76551	306	ENSMUSG00000048701	Ccdc6	coiled-coil domain containing 6	76551	0	gene_body	chr10:70097427-70097577	Ccdc6	Tet
chr10	71361894	71362165	272	*	Intron (ENSMUST00000079252.12/69718, intron 1 of 5)	10	71347763	71385885	38123	1	69718	14131	ENSMUSG00000060733	Ipmk	inositol polyphosphate multikinase	102637684;52637;69718	51149;-16940;0	gene_body	chr10:71361894-71362165	Ipmk	Tet
chr10	71363454	71363885	432	*	Exon (ENSMUST00000079252.12/69718, exon 2 of 6)	10	71347763	71385885	38123	1	69718	15691	ENSMUSG00000060733	Ipmk	inositol polyphosphate multikinase	102637684;52637;69718	52709;-18500;0	gene_body	chr10:71363454-71363885	Ipmk	Tet
chr10	71361991	71362167	177	*	Intron (ENSMUST00000079252.12/69718, intron 1 of 5)	10	71347763	71385885	38123	1	69718	14228	ENSMUSG00000060733	Ipmk	inositol polyphosphate multikinase	102637684;52637;69718	51246;-17037;0	gene_body	chr10:71361991-71362167	Ipmk	Tet
chr10	71361944	71362154	211	*	Intron (ENSMUST00000079252.12/69718, intron 1 of 5)	10	71347763	71385885	38123	1	69718	14181	ENSMUSG00000060733	Ipmk	inositol polyphosphate multikinase	102637684;52637;69718	51199;-16990;0	gene_body	chr10:71361944-71362154	Ipmk	Tet
chr10	71361996	71362197	202	*	Intron (ENSMUST00000079252.12/69718, intron 1 of 5)	10	71347763	71385885	38123	1	69718	14233	ENSMUSG00000060733	Ipmk	inositol polyphosphate multikinase	102637684;52637;69718	51251;-17042;0	gene_body	chr10:71361996-71362197	Ipmk	Tet
chr10	75061002	75061215	214	*	Promoter (<=1kb)	10	75060592	75184921	124330	1	110279	410	ENSMUSG00000009681	Bcr	BCR activator of RhoGEF and GTPase	110279;14687;71236;76877	0;93825;-28416;23944	gene_body	chr10:75061002-75061215	Bcr	Tet
chr10	75061000	75061355	356	*	Promoter (<=1kb)	10	75060592	75184921	124330	1	110279	408	ENSMUSG00000009681	Bcr	BCR activator of RhoGEF and GTPase	110279;14687;71236;76877	0;93823;-28414;23942	gene_body	chr10:75061000-75061355	Bcr	Tet
chr10	75105120	75105383	264	*	Intron (ENSMUST00000164107.2/110279, intron 1 of 22)	10	75060592	75184921	124330	1	110279	44528	ENSMUSG00000009681	Bcr	BCR activator of RhoGEF and GTPase	110279	0	gene_body	chr10:75105120-75105383	Bcr	Tet
chr10	75105141	75105340	200	*	Intron (ENSMUST00000164107.2/110279, intron 1 of 22)	10	75060592	75184921	124330	1	110279	44549	ENSMUSG00000009681	Bcr	BCR activator of RhoGEF and GTPase	110279	0	gene_body	chr10:75105141-75105340	Bcr	Tet
chr10	75105189	75105342	154	*	Intron (ENSMUST00000164107.2/110279, intron 1 of 22)	10	75060592	75184921	124330	1	110279	44597	ENSMUSG00000009681	Bcr	BCR activator of RhoGEF and GTPase	110279	0	gene_body	chr10:75105189-75105342	Bcr	Tet
chr10	75146118	75146319	202	*	Intron (ENSMUST00000164107.2/110279, intron 8 of 22)	10	75212073	75312743	100671	1	74392	-65754	ENSMUSG00000033444	Specc1l	sperm antigen with calponin homology and coiled-coil domains 1-like	110279	0	gene_body	chr10:75146118-75146319	Specc1l	Tet
chr10	75222471	75223085	615	*	Intron (ENSMUST00000218766.1/74392, intron 1 of 15)	10	75212073	75312743	100671	1	74392	10398	ENSMUSG00000033444	Specc1l	sperm antigen with calponin homology and coiled-coil domains 1-like	110279;74392	0;0	gene_body	chr10:75222471-75223085	Specc1l	Tet
chr10	75222579	75222982	404	*	Intron (ENSMUST00000218766.1/74392, intron 1 of 15)	10	75212073	75312743	100671	1	74392	10506	ENSMUSG00000033444	Specc1l	sperm antigen with calponin homology and coiled-coil domains 1-like	110279;74392	0;0	gene_body	chr10:75222579-75222982	Specc1l	Tet
chr10	75299835	75300092	258	*	Intron (ENSMUST00000218766.1/74392, intron 13 of 15)	10	75316877	75334784	17908	1	11540	-16785	ENSMUSG00000020178	Adora2a	adenosine A2a receptor	11540;74392	0;0	gene_body	chr10:75299835-75300092	Adora2a	Tet
chr10	75303892	75304136	245	*	Exon (ENSMUST00000218644.1/74392, exon 2 of 5)	10	75316877	75334784	17908	1	11540	-12741	ENSMUSG00000020178	Adora2a	adenosine A2a receptor	11540;544707;68778;74392	0;-47919;0;0	gene_body	chr10:75303892-75304136	Adora2a	Tet
chr10	75320362	75320643	282	*	Intron (ENSMUST00000105420.2/11540, intron 1 of 2)	10	75316877	75334784	17908	1	11540	3485	ENSMUSG00000020178	Adora2a	adenosine A2a receptor	11540;544707;68778;74392	0;-31412;0;0	gene_body	chr10:75320362-75320643	Adora2a	Tet
chr10	75320443	75320614	172	*	Intron (ENSMUST00000105420.2/11540, intron 1 of 2)	10	75316877	75334784	17908	1	11540	3566	ENSMUSG00000020178	Adora2a	adenosine A2a receptor	11540;544707;68778;74392	0;-31441;0;0	gene_body	chr10:75320443-75320614	Adora2a	Tet
chr10	75326493	75326979	487	*	Intron (ENSMUST00000105420.2/11540, intron 2 of 2)	10	75316877	75334784	17908	1	11540	9616	ENSMUSG00000020178	Adora2a	adenosine A2a receptor	11540;544707;68778;74392	0;-25076;0;0	gene_body	chr10:75326493-75326979	Adora2a	Tet
chr10	75326545	75326853	309	*	Intron (ENSMUST00000105420.2/11540, intron 2 of 2)	10	75316877	75334784	17908	1	11540	9668	ENSMUSG00000020178	Adora2a	adenosine A2a receptor	11540;544707;68778;74392	0;-25202;0;0	gene_body	chr10:75326545-75326853	Adora2a	Tet
chr10	75326649	75326823	175	*	Intron (ENSMUST00000105420.2/11540, intron 2 of 2)	10	75316877	75334784	17908	1	11540	9772	ENSMUSG00000020178	Adora2a	adenosine A2a receptor	11540;544707;68778;74392	0;-25232;0;0	gene_body	chr10:75326649-75326823	Adora2a	Tet
chr10	75354057	75354300	244	*	Intron (ENSMUST00000145890.7/68778, intron 8 of 8)	10	75352055	75352964	910	1	544707	2002	ENSMUSG00000112471	Gm5779	ribosomal protein, large, P0 pseudogene	103149;11540;544707;68778;74392	0;0;2002;0;0	gene_body	chr10:75354057-75354300	Gm5779	Tet
chr10	75365300	75365488	189	*	Intron (ENSMUST00000145890.7/68778, intron 6 of 8)	10	75352055	75352964	910	1	544707	13245	ENSMUSG00000112471	Gm5779	ribosomal protein, large, P0 pseudogene	103149;11540;544707;68778	0;0;13245;0	gene_body	chr10:75365300-75365488	Gm5779	Tet
chr10	75433382	75433622	241	*	Intron (ENSMUST00000039925.7/103149, intron 6 of 9)	10	75401115	75441679	40565	1	103149	32267	ENSMUSG00000033427	Upb1	ureidopropionase, beta	103149;68778	0;0	gene_body	chr10:75433382-75433622	Upb1	Tet
chr10	75434453	75434908	456	*	Intron (ENSMUST00000039925.7/103149, intron 6 of 9)	10	75401115	75441679	40565	1	103149	33338	ENSMUSG00000033427	Upb1	ureidopropionase, beta	103149;68778	0;0	gene_body	chr10:75434453-75434908	Upb1	Tet
chr10	75434504	75434853	350	*	Intron (ENSMUST00000039925.7/103149, intron 6 of 9)	10	75401115	75441679	40565	1	103149	33389	ENSMUSG00000033427	Upb1	ureidopropionase, beta	103149;68778	0;0	gene_body	chr10:75434504-75434853	Upb1	Tet
chr10	75434538	75434803	266	*	Intron (ENSMUST00000039925.7/103149, intron 6 of 9)	10	75401115	75441679	40565	1	103149	33423	ENSMUSG00000033427	Upb1	ureidopropionase, beta	103149;68778	0;0	gene_body	chr10:75434538-75434803	Upb1	Tet
chr10	75446417	75446899	483	*	Intron (ENSMUST00000145890.7/68778, intron 5 of 8)	10	75401115	75441679	40565	1	103149	45302	ENSMUSG00000033427	Upb1	ureidopropionase, beta	103149;68778	0;0	gene_body	chr10:75446417-75446899	Upb1	Tet
chr10	75921025	75921260	236	*	Promoter (<=1kb)	10	75896769	75921617	24849	2	20587	357	ENSMUSG00000000902	Smarcb1	SWI/SNF related, matrix associated, actin dependent regulator of chromatin, subfamily b, member 1	103172;17385;20587;22364;333669;333670;70377	-11870;15236;0;-21797;-33254;19412;27612	gene_body	chr10:75921025-75921260	Smarcb1	Tet
chr10	77273450	77273630	181	*	Distal Intergenic	10	77257776	77259223	1448	2	100169878	-14227	ENSMUSG00000078444	Gm10941	predicted gene 10941	100169878;110532;80294	-14227;144640;14232	Distal Intergenic	chr10:77273450-77273630	Gm10941	Tet
chr10	77520589	77520778	190	*	Distal Intergenic	10	77486661	77515785	29125	2	108707	-4804	ENSMUSG00000032977	Fam207a	family with sequence similarity 207, member A	108707;16414	-4804;0	Distal Intergenic	chr10:77520589-77520778	Fam207a	Tet
chr10	77520587	77520743	157	*	Distal Intergenic	10	77486661	77515785	29125	2	108707	-4802	ENSMUSG00000032977	Fam207a	family with sequence similarity 207, member A	108707;16414	-4802;0	Distal Intergenic	chr10:77520587-77520743	Fam207a	Tet
chr10	77522245	77522721	477	*	Distal Intergenic	10	77486661	77515785	29125	2	108707	-6460	ENSMUSG00000032977	Fam207a	family with sequence similarity 207, member A	108707;16414	-6460;0	Distal Intergenic	chr10:77522245-77522721	Fam207a	Tet
chr10	77522299	77522659	361	*	Distal Intergenic	10	77486661	77515785	29125	2	108707	-6514	ENSMUSG00000032977	Fam207a	family with sequence similarity 207, member A	108707;16414	-6514;0	Distal Intergenic	chr10:77522299-77522659	Fam207a	Tet
chr10	77522321	77522645	325	*	Distal Intergenic	10	77486661	77515785	29125	2	108707	-6536	ENSMUSG00000032977	Fam207a	family with sequence similarity 207, member A	108707;16414	-6536;0	Distal Intergenic	chr10:77522321-77522645	Fam207a	Tet
chr10	77522243	77522644	402	*	Distal Intergenic	10	77486661	77515785	29125	2	108707	-6458	ENSMUSG00000032977	Fam207a	family with sequence similarity 207, member A	108707;16414	-6458;0	Distal Intergenic	chr10:77522243-77522644	Fam207a	Tet
chr10	77536003	77536168	166	*	Intron (ENSMUST00000000299.13/16414, intron 1 of 15)	10	77530252	77565708	35457	1	16414	5751	ENSMUSG00000000290	Itgb2	integrin beta 2	108705;108707;16414	-45552;-20218;0	gene_body	chr10:77536003-77536168	Itgb2	Tet
chr10	77536786	77537078	293	*	Intron (ENSMUST00000000299.13/16414, intron 1 of 15)	10	77530252	77565708	35457	1	16414	6534	ENSMUSG00000000290	Itgb2	integrin beta 2	108705;108707;16414	-44642;-21001;0	gene_body	chr10:77536786-77537078	Itgb2	Tet
chr10	77537336	77537545	210	*	Intron (ENSMUST00000000299.13/16414, intron 1 of 15)	10	77530252	77565708	35457	1	16414	7084	ENSMUSG00000000290	Itgb2	integrin beta 2	108705;108707;16414	-44175;-21551;0	gene_body	chr10:77537336-77537545	Itgb2	Tet
chr10	77536891	77537068	178	*	Intron (ENSMUST00000000299.13/16414, intron 1 of 15)	10	77530252	77565708	35457	1	16414	6639	ENSMUSG00000000290	Itgb2	integrin beta 2	108705;108707;16414	-44652;-21106;0	gene_body	chr10:77536891-77537068	Itgb2	Tet
chr10	77537339	77537526	188	*	Intron (ENSMUST00000000299.13/16414, intron 1 of 15)	10	77530252	77565708	35457	1	16414	7087	ENSMUSG00000000290	Itgb2	integrin beta 2	108705;108707;16414	-44194;-21554;0	gene_body	chr10:77537339-77537526	Itgb2	Tet
chr10	77537332	77537495	164	*	Intron (ENSMUST00000000299.13/16414, intron 1 of 15)	10	77530252	77565708	35457	1	16414	7080	ENSMUSG00000000290	Itgb2	integrin beta 2	108705;108707;16414	-44225;-21547;0	gene_body	chr10:77537332-77537495	Itgb2	Tet
chr10	77556653	77557016	364	*	Intron (ENSMUST00000000299.13/16414, intron 9 of 15)	10	77581720	77598732	17013	1	108705	-24704	ENSMUSG00000009291	Pttg1ip	pituitary tumor-transforming 1 interacting protein	108705;108707;16414;20610	-24704;-40868;0;0	gene_body	chr10:77556653-77557016	Pttg1ip	Tet
chr10	77607086	77607237	152	*	Promoter (<=1kb)	10	77606097	77641543	35447	1	20610	989	ENSMUSG00000020265	Sumo3	small ubiquitin-like modifier 3	100316811;108705;16414;20610;22213	-33987;25366;0;0;-15038	gene_body	chr10:77607086-77607237	Sumo3	Tet
chr10	77606981	77607288	308	*	Promoter (<=1kb)	10	77606097	77641543	35447	1	20610	884	ENSMUSG00000020265	Sumo3	small ubiquitin-like modifier 3	100316811;108705;16414;20610;22213	-33936;25261;0;0;-14987	gene_body	chr10:77606981-77607288	Sumo3	Tet
chr10	77984753	77985056	304	*	3' UTR	10	77978524	77986905	8382	1	67884	6229	ENSMUSG00000020284	Cfap410	cilia and flagella associated protein 410	11634;18641;28240;67884	58554;0;-14190;0	gene_body	chr10:77984753-77985056	Cfap410	Tet
chr10	78009245	78009501	257	*	Promoter (<=1kb)	10	77986947	78010083	23137	2	18641	582	ENSMUSG00000020277	Pfkl	phosphofructokinase, liver, B-type	11634;18641;28240;54427;67884	34109;0;-38682;-32446;0	gene_body	chr10:78009245-78009501	Pfkl	Tet
chr10	78009262	78009472	211	*	Promoter (<=1kb)	10	77986947	78010083	23137	2	18641	611	ENSMUSG00000020277	Pfkl	phosphofructokinase, liver, B-type	11634;18641;28240;54427;67884	34138;0;-38699;-32475;0	gene_body	chr10:78009262-78009472	Pfkl	Tet
chr10	78086431	78086723	293	*	Downstream (2-3kb)	10	78069302	78083913	14612	1	50723	17129	ENSMUSG00000000732	Icosl	icos ligand	11634;50723;54427	-42821;17129;44484	gene_body	chr10:78086431-78086723	Icosl	Tet
chr10	78159330	78159508	179	*	Distal Intergenic	10	78162066	78169782	7717	2	28295	10274	ENSMUSG00000053329	Gatd3a	glutamine amidotransferase like class 1 domain containing 3A	110816;216131;28295	0;85133;10274	Distal Intergenic	chr10:78159330-78159508	Gatd3a	Tet
chr10	78184760	78184909	150	*	Promoter (<=1kb)	10	78170909	78185149	14241	2	110816	240	ENSMUSG00000032834	Pwp2	PWP2 periodic tryptophan protein homolog (yeast)	110816;216131;28295	0;59732;-14978	gene_body	chr10:78184760-78184909	Pwp2	Tet
chr10	78303836	78303987	152	*	Intron (ENSMUST00000001240.11/28169, intron 2 of 9)	10	78340150	78340207	58	2	102465765	36220	ENSMUSG00000098885	Mir7659	microRNA 7659	102465765;28169	36220;0	gene_body	chr10:78303836-78303987	Mir7659	Tet
chr10	78396322	78396502	181	*	Distal Intergenic	10	78408475	78408545	71	2	102465547	12043	ENSMUSG00000098376	Mir6907	microRNA 6907	102465221;102465547;102466762;13014;18114;216134;28169	-38297;12043;48655;-29167;16541;0;0	Distal Intergenic	chr10:78396322-78396502	Mir6907	Tet
chr10	78457801	78458225	425	*	Intron (ENSMUST00000041616.14/216134, intron 1 of 10)	10	78436744	78464975	28232	2	216134	6750	ENSMUSG00000032788	Pdxk	pyridoxal (pyridoxine, vitamin B6) kinase	102465221;102465547;102466762;13014;18114;216134	23002;-49256;-12644;32132;-44758;0	gene_body	chr10:78457801-78458225	Pdxk	Tet
chr10	78457889	78458165	277	*	Intron (ENSMUST00000041616.14/216134, intron 1 of 10)	10	78436744	78464975	28232	2	216134	6810	ENSMUSG00000032788	Pdxk	pyridoxal (pyridoxine, vitamin B6) kinase	102465221;102465547;102466762;13014;18114;216134	23090;-49344;-12732;32220;-44846;0	gene_body	chr10:78457889-78458165	Pdxk	Tet
chr10	78457879	78458199	321	*	Intron (ENSMUST00000041616.14/216134, intron 1 of 10)	10	78436744	78464975	28232	2	216134	6776	ENSMUSG00000032788	Pdxk	pyridoxal (pyridoxine, vitamin B6) kinase	102465221;102465547;102466762;13014;18114;216134	23080;-49334;-12722;32210;-44836;0	gene_body	chr10:78457879-78458199	Pdxk	Tet
chr10	78457966	78458136	171	*	Intron (ENSMUST00000041616.14/216134, intron 1 of 10)	10	78436744	78464975	28232	2	216134	6839	ENSMUSG00000032788	Pdxk	pyridoxal (pyridoxine, vitamin B6) kinase	102465221;102465547;102466762;13014;18114;216134	23167;-49421;-12809;32297;-44923;0	gene_body	chr10:78457966-78458136	Pdxk	Tet
chr10	78481837	78482424	588	*	Distal Intergenic	10	78436744	78464975	28232	2	216134	-16862	ENSMUSG00000032788	Pdxk	pyridoxal (pyridoxine, vitamin B6) kinase	102465221;102466762;216134;258224	47038;-36680;0;-35004	Distal Intergenic	chr10:78481837-78482424	Pdxk	Tet
chr10	78481832	78482425	594	*	Distal Intergenic	10	78436744	78464975	28232	2	216134	-16857	ENSMUSG00000032788	Pdxk	pyridoxal (pyridoxine, vitamin B6) kinase	102465221;102466762;216134;258224	47033;-36675;0;-35003	Distal Intergenic	chr10:78481832-78482425	Pdxk	Tet
chr10	78481787	78482250	464	*	Distal Intergenic	10	78436744	78464975	28232	2	216134	-16812	ENSMUSG00000032788	Pdxk	pyridoxal (pyridoxine, vitamin B6) kinase	102465221;102466762;216134;258224	46988;-36630;0;-35178	Distal Intergenic	chr10:78481787-78482250	Pdxk	Tet
chr10	78481704	78482249	546	*	Distal Intergenic	10	78436744	78464975	28232	2	216134	-16729	ENSMUSG00000032788	Pdxk	pyridoxal (pyridoxine, vitamin B6) kinase	102465221;102466762;216134;258224	46905;-36547;0;-35179	Distal Intergenic	chr10:78481704-78482249	Pdxk	Tet
chr10	79533155	79533304	150	*	Promoter (<=1kb)	10	79526430	79533796	7367	2	50784	492	ENSMUSG00000052151	Plpp2	phospholipid phosphatase 2	102465548;21830;50784;625029;70427	-2065;54027;0;64424;21895	gene_body	chr10:79533155-79533304	Plpp2	Tet
chr10	79936899	79937389	491	*	Intron (ENSMUST00000019708.11/13496, intron 3 of 8)	10	79927043	79955018	27976	1	13496	9856	ENSMUSG00000019564	Arid3a	AT rich interactive domain 3A (BRIGHT-like)	109284;114229;11537;13496;170483;216154;216156;216157;50701	-15691;19928;46046;0;-33326;-27976;-22763;46941;50652	gene_body	chr10:79936899-79937389	Arid3a	Tet
chr10	79937023	79937369	347	*	Intron (ENSMUST00000019708.11/13496, intron 3 of 8)	10	79927043	79955018	27976	1	13496	9980	ENSMUSG00000019564	Arid3a	AT rich interactive domain 3A (BRIGHT-like)	109284;114229;11537;13496;170483;216154;216156;216157;50701	-15815;20052;46170;0;-33346;-28100;-22783;46961;50776	gene_body	chr10:79937023-79937369	Arid3a	Tet
chr10	79936937	79937323	387	*	Intron (ENSMUST00000019708.11/13496, intron 3 of 8)	10	79927043	79955018	27976	1	13496	9894	ENSMUSG00000019564	Arid3a	AT rich interactive domain 3A (BRIGHT-like)	109284;114229;11537;13496;170483;216154;216156;216157;50701	-15729;19966;46084;0;-33392;-28014;-22829;47007;50690	gene_body	chr10:79936937-79937323	Arid3a	Tet
chr10	80023864	80024033	170	*	Intron (ENSMUST00000099501.9/70719, intron 10 of 22)	10	80016653	80031472	14820	1	70719	7211	ENSMUSG00000035697	Arhgap45	Rho GTPase activating protein 45	12798;170483;216157;216161;27403;625249;66420;70719	35280;53149;-39534;81538;27370;-23133;15762;0	gene_body	chr10:80023864-80024033	Arhgap45	Tet
chr10	80024180	80024497	318	*	Intron (ENSMUST00000099501.9/70719, intron 10 of 22)	10	80016653	80031472	14820	1	70719	7527	ENSMUSG00000035697	Arhgap45	Rho GTPase activating protein 45	12798;170483;216157;216161;27403;625249;66420;70719	35596;53465;-39850;81074;27686;-22669;15298;0	gene_body	chr10:80024180-80024497	Arhgap45	Tet
chr10	80024233	80024478	246	*	Intron (ENSMUST00000099501.9/70719, intron 10 of 22)	10	80016653	80031472	14820	1	70719	7580	ENSMUSG00000035697	Arhgap45	Rho GTPase activating protein 45	12798;170483;216157;216161;27403;625249;66420;70719	35649;53518;-39903;81093;27739;-22688;15317;0	gene_body	chr10:80024233-80024478	Arhgap45	Tet
chr10	80024311	80024460	150	*	Intron (ENSMUST00000099501.9/70719, intron 10 of 22)	10	80016653	80031472	14820	1	70719	7658	ENSMUSG00000035697	Arhgap45	Rho GTPase activating protein 45	12798;170483;216157;216161;27403;625249;66420;70719	35727;53596;-39981;81111;27817;-22706;15335;0	gene_body	chr10:80024311-80024460	Arhgap45	Tet
chr10	80033247	80033396	150	*	Downstream (1-2kb)	10	80035949	80039795	3847	2	66420	6399	ENSMUSG00000004667	Polr2e	polymerase (RNA) II (DNA directed) polypeptide E	12798;216157;216161;27403;625249;66420;70719	44663;-48917;72175;36753;-13770;6399;0	gene_body	chr10:80033247-80033396	Polr2e	Tet
chr10	80159581	80160224	644	*	Downstream (1-2kb)	10	80165985	80172786	6802	1	12696	-5761	ENSMUSG00000045193	Cirbp	cold inducible RNA binding protein	100503659;12696;13637;20869;59090;66043;69770	-18746;-5761;-19258;43778;11309;18124;-12720	gene_body	chr10:80159581-80160224	Cirbp	Tet
chr10	80159757	80160209	453	*	Downstream (1-2kb)	10	80165985	80172786	6802	1	12696	-5776	ENSMUSG00000045193	Cirbp	cold inducible RNA binding protein	100503659;12696;13637;20869;59090;66043;69770	-18922;-5776;-19273;43954;11485;18300;-12735	gene_body	chr10:80159757-80160209	Cirbp	Tet
chr10	80159754	80160222	469	*	Downstream (1-2kb)	10	80165985	80172786	6802	1	12696	-5763	ENSMUSG00000045193	Cirbp	cold inducible RNA binding protein	100503659;12696;13637;20869;59090;66043;69770	-18919;-5763;-19260;43951;11482;18297;-12722	gene_body	chr10:80159754-80160222	Cirbp	Tet
chr10	80159851	80160095	245	*	Downstream (1-2kb)	10	80165985	80172786	6802	1	12696	-5890	ENSMUSG00000045193	Cirbp	cold inducible RNA binding protein	100503659;12696;13637;20869;59090;66043;69770	-19016;-5890;-19387;44048;11579;18394;-12849	gene_body	chr10:80159851-80160095	Cirbp	Tet
chr10	80267699	80267896	198	*	Intron (ENSMUST00000156935.7/70248, intron 1 of 6)	10	80261486	80288408	26923	1	70248	6213	ENSMUSG00000069565	Dazap1	DAZ associated protein 1	102466207;14431;20054;23805;68114;70248;75406	-10268;-6687;-24557;-28081;41265;0;18578	gene_body	chr10:80267699-80267896	Dazap1	Tet
chr10	80398825	80399108	284	*	Promoter (<=1kb)	10	80392539	80399550	7012	2	17192	442	ENSMUSG00000035478	Mbd3	methyl-CpG binding domain protein 3	17192;21423;216166;237400;66594	0;34539;42366;-11166;7722	gene_body	chr10:80398825-80399108	Mbd3	Tet
chr10	80398828	80399011	184	*	Promoter (<=1kb)	10	80392539	80399550	7012	2	17192	539	ENSMUSG00000035478	Mbd3	methyl-CpG binding domain protein 3	17192;21423;216166;237400;66594	0;34636;42369;-11169;7819	gene_body	chr10:80398828-80399011	Mbd3	Tet
chr10	80398810	80399160	351	*	Promoter (<=1kb)	10	80392539	80399550	7012	2	17192	390	ENSMUSG00000035478	Mbd3	methyl-CpG binding domain protein 3	17192;21423;216166;237400;66594	0;34487;42351;-11151;7670	gene_body	chr10:80398810-80399160	Mbd3	Tet
chr10	80618301	80618520	220	*	Downstream (2-3kb)	10	80622838	80640749	17912	1	103236	-4318	ENSMUSG00000003345	Csnk1g2	casein kinase 1, gamma 2	100113398;102465550;103236;118445;17347;208198;216169;56214	15421;9041;-4318;-40980;59592;38551;-27960;15429	gene_body	chr10:80618301-80618520	Csnk1g2	Tet
chr10	80618301	80618514	214	*	Downstream (2-3kb)	10	80622838	80640749	17912	1	103236	-4324	ENSMUSG00000003345	Csnk1g2	casein kinase 1, gamma 2	100113398;102465550;103236;118445;17347;208198;216169;56214	15421;9041;-4324;-40980;59598;38557;-27960;15429	gene_body	chr10:80618301-80618514	Csnk1g2	Tet
chr10	80618333	80618494	162	*	Downstream (2-3kb)	10	80622838	80640749	17912	1	103236	-4344	ENSMUSG00000003345	Csnk1g2	casein kinase 1, gamma 2	100113398;102465550;103236;118445;17347;208198;216169;56214	15453;9073;-4344;-41012;59618;38577;-27992;15461	gene_body	chr10:80618333-80618494	Csnk1g2	Tet
chr10	80684288	80684496	209	*	Distal Intergenic	10	80665327	80678112	12786	2	17347	-6176	ENSMUSG00000020190	Mknk2	MAP kinase-interacting serine/threonine kinase 2	103236;11776;17347;208198;208228;71564	61450;57768;-6176;-27217;0;-17688	Distal Intergenic	chr10:80684288-80684496	Mknk2	Tet
chr10	80696187	80696402	216	*	Intron (ENSMUST00000003438.10/208228, intron 1 of 3)	10	80685253	80701977	16725	2	208228	5575	ENSMUSG00000003348	Mob3a	MOB kinase activator 3A	11776;17347;208198;208228;71564	45862;-18075;-39116;0;-5782	gene_body	chr10:80696187-80696402	Mob3a	Tet
chr10	80751515	80751772	258	*	Distal Intergenic	10	80755206	80795461	40256	1	208266	-3434	ENSMUSG00000061589	Dot1l	DOT1-like, histone H3 methyltransferase (S. cerevisiae)	11776;20222;208228;208266;71564;78670	-9251;-46426;0;-3434;49331;46854	Distal Intergenic	chr10:80751515-80751772	Dot1l	Tet
chr10	80752144	80752306	163	*	Distal Intergenic	10	80755206	80795461	40256	1	208266	-2900	ENSMUSG00000061589	Dot1l	DOT1-like, histone H3 methyltransferase (S. cerevisiae)	11776;20222;208266;71564;78670	-9880;-45892;-2900;49960;46320	Distal Intergenic	chr10:80752144-80752306	Dot1l	Tet
chr10	80752153	80752326	174	*	Distal Intergenic	10	80755206	80795461	40256	1	208266	-2880	ENSMUSG00000061589	Dot1l	DOT1-like, histone H3 methyltransferase (S. cerevisiae)	11776;20222;208266;71564;78670	-9889;-45872;-2880;49969;46300	Distal Intergenic	chr10:80752153-80752326	Dot1l	Tet
chr10	80939242	80939487	246	*	Distal Intergenic	10	80930073	80932204	2132	1	17873	9169	ENSMUSG00000015312	Gadd45b	growth arrest and DNA-damage-inducible 45 beta	14708;16907;17873;30055;432478	0;-20997;9169;-38273;67394	Distal Intergenic	chr10:80939242-80939487	Gadd45b	Tet
chr10	80939671	80940078	408	*	Distal Intergenic	10	80930073	80932204	2132	1	17873	9598	ENSMUSG00000015312	Gadd45b	growth arrest and DNA-damage-inducible 45 beta	14708;16907;17873;30055;432478	0;-21426;9598;-38702;67823	Distal Intergenic	chr10:80939671-80940078	Gadd45b	Tet
chr10	80985667	80985949	283	*	Intron (ENSMUST00000099462.7/14708, intron 2 of 3)	10	80948624	81014945	66322	2	14708	28996	ENSMUSG00000048240	Gng7	guanine nucleotide binding protein (G protein), gamma 7	106947;14708;208666	51477;0;39713	gene_body	chr10:80985667-80985949	Gng7	Tet
chr10	80988081	80988253	173	*	Intron (ENSMUST00000099462.7/14708, intron 2 of 3)	10	80948624	81014945	66322	2	14708	26692	ENSMUSG00000048240	Gng7	guanine nucleotide binding protein (G protein), gamma 7	106947;14708;208666	49173;0;37409	gene_body	chr10:80988081-80988253	Gng7	Tet
chr10	81129390	81129582	193	*	3' UTR	10	81135220	81152995	17776	1	16969	-5638	ENSMUSG00000035011	Zbtb7a	zinc finger and BTB domain containing 7a	100217454;100885825;100885826;13629;16969;208677;26396;50492;59004	-49368;-24717;24774;-47049;0;-30516;0;59355;38341	gene_body	chr10:81129390-81129582	Zbtb7a	Tet
chr10	81138190	81138376	187	*	Intron (ENSMUST00000125261.1/16969, intron 1 of 1)	10	81135220	81152995	17776	1	16969	2970	ENSMUSG00000035011	Zbtb7a	zinc finger and BTB domain containing 7a	100217454;100885825;100885826;13144;13629;16969;208677;26396;59004	-40574;-33517;33574;-44629;-38255;0;-39316;0;29547	gene_body	chr10:81138190-81138376	Zbtb7a	Tet
chr10	81173181	81173379	199	*	Distal Intergenic	10	81176631	81182498	5868	1	13629	-3252	ENSMUSG00000034994	Eef2	eukaryotic translation elongation factor 2	100217454;13144;13629;16467;16969;26396;59004;69564;69678	-5571;-9626;-3252;57454;0;0;-5258;28672;-21230	Distal Intergenic	chr10:81173181-81173379	Eef2	Tet
chr10	81253192	81253377	186	*	Promoter (<=1kb)	10	81252935	81263365	10431	1	17179	257	ENSMUSG00000004933	Matk	megakaryocyte-associated tyrosine kinase	100526465;103406;16467;17179;18717;27375;57267;66047;69678	-18220;20037;-22359;0;-39586;38204;-13583;13557;58583	gene_body	chr10:81253192-81253377	Matk	Tet
chr10	81433012	81433215	204	*	Intron (ENSMUST00000221817.1/18029, intron 1 of 9)	10	81416240	81416297	58	2	102465778	-16715	ENSMUSG00000105379	Mir1191b	microRNA 1191b	102115;102465778;102466763;102634174;18029;319586;72273	48584;-16715;46665;23437;0;49494;39961	gene_body	chr10:81433012-81433215	Mir1191b	Tet
chr10	81499613	81499880	268	*	Promoter (<=1kb)	10	81497747	81500132	2386	2	13611	252	ENSMUSG00000044199	S1pr4	sphingosine-1-phosphate receptor 4	103425;13611;14672;14676;18029;319586	-3221;0;45310;0;0;-16904	gene_body	chr10:81499613-81499880	S1pr4	Tet
chr10	81510362	81510643	282	*	Intron (ENSMUST00000043709.7/14676, intron 4 of 6)	10	81497747	81500132	2386	2	13611	-10230	ENSMUSG00000044199	S1pr4	sphingosine-1-phosphate receptor 4	103425;13611;14672;14676;14797;319586	-13970;0;34547;0;-48845;-27653	gene_body	chr10:81510362-81510643	S1pr4	Tet
chr10	81510370	81510613	244	*	Intron (ENSMUST00000043709.7/14676, intron 4 of 6)	10	81497747	81500132	2386	2	13611	-10238	ENSMUSG00000044199	S1pr4	sphingosine-1-phosphate receptor 4	103425;13611;14672;14676;14797;319586	-13978;0;34577;0;-48875;-27661	gene_body	chr10:81510370-81510613	S1pr4	Tet
chr10	81551579	81551909	331	*	Distal Intergenic	10	81528724	81545190	16467	2	14672	-6389	ENSMUSG00000034781	Gna11	guanine nucleotide binding protein, alpha 11	114606;14672;14676;14797;21886	49164;-6389;0;-7579;-22652	Distal Intergenic	chr10:81551579-81551909	Gna11	Tet
chr10	81551663	81551838	176	*	Distal Intergenic	10	81528724	81545190	16467	2	14672	-6473	ENSMUSG00000034781	Gna11	guanine nucleotide binding protein, alpha 11	114606;14672;14676;14797;21886	49235;-6473;0;-7650;-22723	Distal Intergenic	chr10:81551663-81551838	Gna11	Tet
chr10	81551660	81551879	220	*	Distal Intergenic	10	81528724	81545190	16467	2	14672	-6470	ENSMUSG00000034781	Gna11	guanine nucleotide binding protein, alpha 11	114606;14672;14676;14797;21886	49194;-6470;0;-7609;-22682	Distal Intergenic	chr10:81551660-81551879	Gna11	Tet
chr10	81571609	81571803	195	*	Distal Intergenic	10	81574561	81590845	16285	1	21886	-2758	ENSMUSG00000034771	Tle2	transducin-like enhancer of split 2	114606;14672;14676;14797;21886;268319;50721	29270;-26419;0;12121;-2758;-34467;55994	Distal Intergenic	chr10:81571609-81571803	Tle2	Tet
chr10	81996761	81997465	705	*	Distal Intergenic	10	82048123	82061586	13464	1	408062	-50658	ENSMUSG00000061371	Zfp873	zinc finger protein 873			Distal Intergenic	chr10:81996761-81997465	Zfp873	Tet
chr10	81996800	81997170	371	*	Distal Intergenic	10	82048123	82061586	13464	1	408062	-50953	ENSMUSG00000061371	Zfp873	zinc finger protein 873			Distal Intergenic	chr10:81996800-81997170	Zfp873	Tet
[truncated: 14,035 more rows]

## Sheet: TFH
seqnames	start	end	width	strand	annotation	geneChr	geneStart	geneEnd	geneLength	geneStrand	geneId	distanceToTSS	ENSEMBL	SYMBOL	GENENAME	flank_geneIds	flank_gene_distances	type	Region.ID	gene	sampletype
[truncated: 33,841 more rows]

[truncated: 2 more sheets: TH0, overlaps]
