# Supplementary material for: T-follicular helper cells are epigenetically poised to transdifferentiate into T-regulatory type 1 cells
Source: eLife. 2024 Nov 22;13:RP97665. doi: 10.7554/eLife.97665 (PMC11584177; doi:10.7554/eLife.97665)
Supplement: Figure 6—source data 2. [file elife-97665-fig6-data2.xlsx]

## Sheet: Sheet1
gene	type	status	Number of active enhancers	fold
Prkch	gene_body	Shared Tet and TFH	116	-9.14679
Fyn	gene_body	Shared Tet and TFH	111	-11.7427
Hivep2	gene_body	Shared Tet and TFH	96	-19.7552
Rplp1	Distal Intergenic	Shared Tet and TFH	94	0
Ets1	gene_body	Shared Tet and TFH	89	-3.36879
Tox	gene_body	Shared Tet and TFH	79	-45.2428
Stk39	gene_body	Shared Tet and TFH	73	-7.58476
Nek7	gene_body	Shared Tet and TFH	72	-7.16181
Itpkb	gene_body	Shared Tet and TFH	70	-4.14153
Inpp4b	gene_body	Shared Tet and TFH	69	1.5571
Nfatc1	gene_body	Shared Tet and TFH	68	-1.71932
Maf	Distal Intergenic	Shared Tet and TFH	65	-5.16487
Arid5b	gene_body	Shared Tet and TFH	64	-13.8367
Ezh2	Distal Intergenic	Shared Tet and TFH	64	0
Rapgef1	gene_body	Shared Tet and TFH	64	-1.22136
Foxp1	gene_body	Shared Tet and TFH	58	0
Usp6nl	gene_body	Shared Tet and TFH	58	-0.926822
Msi2	gene_body	Shared Tet and TFH	56	-1.36471
Atxn1	gene_body	Shared Tet and TFH	55	9.82661
Ptk2b	gene_body	Shared Tet and TFH	53	-1.49088
Pip4k2a	gene_body	Shared Tet and TFH	52	0
Fam43a	Distal Intergenic	Shared Tet and TFH	50	-0.0988121
Nrip1	gene_body	Shared Tet and TFH	49	-2.14695
Mbnl1	gene_body	Shared Tet and TFH	48	0
Smad3	gene_body	Shared Tet and TFH	48	-0.384861
Maf	gene_body	Shared Tet and TFH	47	-5.16487
Smco4	gene_body	Shared Tet and TFH	47	-0.547421
Hif1a	gene_body	Shared Tet and TFH	46	-6.45511
Tbl1xr1	Distal Intergenic	Shared Tet and TFH	46	-0.888247
Trib1	gene_body	Shared Tet and TFH	46	-0.365856
Btg1	Distal Intergenic	Shared Tet and TFH	45	-6.04553
Cd47	Distal Intergenic	Shared Tet and TFH	45	0.226746
Slco3a1	gene_body	Shared Tet and TFH	45	-2.1716
Dhrs3	gene_body	Shared Tet and TFH	43	-0.363028
Gfod1	gene_body	Shared Tet and TFH	43	0
Icos	Distal Intergenic	Shared Tet and TFH	43	0
Tspan14	gene_body	Shared Tet and TFH	41	-0.259728
Atxn7l1	gene_body	Shared Tet and TFH	40	0
Fam107b	gene_body	Shared Tet and TFH	40	0
Sntb1	gene_body	Shared Tet and TFH	40	-5.76336
Cd44	gene_body	Shared Tet and TFH	39	-9.71047
Irf2bp2	Distal Intergenic	Shared Tet and TFH	38	0
Akap11	Distal Intergenic	Shared Tet and TFH	37	0
Hdac4	gene_body	Shared Tet and TFH	37	0
Osbpl3	gene_body	Shared Tet and TFH	37	-0.631822
Rab8b	gene_body	Shared Tet and TFH	37	-7.55579
Atp2b1	Distal Intergenic	Shared Tet and TFH	36	0
Heg1	gene_body	Shared Tet and TFH	36	-1.25913
Lnx2	gene_body	Shared Tet and TFH	36	-1.49299
Ccnd3	gene_body	Shared Tet and TFH	35	-0.245348
Wwox	gene_body	Shared Tet and TFH	35	-1.20617
Ankrd46	Distal Intergenic	Shared Tet and TFH	34	0
Chst2	Distal Intergenic	Shared Tet and TFH	34	0.0579856
Il10	Distal Intergenic	Shared Tet and TFH	34	3.72632
Sorl1	gene_body	Shared Tet and TFH	34	0
Gpr68	gene_body	Shared Tet and TFH	33	0.191722
Lmnb1	gene_body	Shared Tet and TFH	33	0
Jarid2	gene_body	Shared Tet and TFH	32	-18.7191
Ppp1r16b	gene_body	Shared Tet and TFH	32	-3.78795
Sh3kbp1	gene_body	Shared Tet and TFH	32	-1.67097
Atf7ip	Distal Intergenic	Shared Tet and TFH	31	0
Lrrc8d	Distal Intergenic	Shared Tet and TFH	31	-0.153215
Rnf19a	gene_body	Shared Tet and TFH	31	-0.58016
Aebp2	Distal Intergenic	Shared Tet and TFH	30	0
Ccr1	Distal Intergenic	Shared Tet and TFH	30	0
Ldlrad4	gene_body	Shared Tet and TFH	30	-6.81083
Nfkb1	gene_body	Shared Tet and TFH	30	-37.9458
Ppp2r5c	Distal Intergenic	Shared Tet and TFH	30	0
Tbc1d4	gene_body	Shared Tet and TFH	30	-1.76956
Asap1	gene_body	Shared Tet and TFH	29	-6.77694
Gm5148	Distal Intergenic	Shared Tet and TFH	29	0
Myo3b	gene_body	Shared Tet and TFH	29	0.239686
Tnfsf8	Distal Intergenic	Shared Tet and TFH	29	-38.0782
Ubl3	Distal Intergenic	Shared Tet and TFH	29	-1.17453
Cd83	Distal Intergenic	Shared Tet and TFH	28	-0.878512
Ikzf2	gene_body	Shared Tet and TFH	28	-5.99361
Lpin1	Distal Intergenic	Shared Tet and TFH	28	0
Ptpn11	gene_body	Shared Tet and TFH	28	-0.401142
Stx6	gene_body	Shared Tet and TFH	28	0
Tigit	gene_body	Shared Tet and TFH	28	-0.243755
Tox2	gene_body	Shared Tet and TFH	28	-5.87803
Fam53b	gene_body	Shared Tet and TFH	27	0.0604015
Fosb	gene_body	Shared Tet and TFH	27	-8.64043
Ksr1	gene_body	Shared Tet and TFH	27	-0.709189
Phactr2	gene_body	Shared Tet and TFH	27	-9.06827
Bach2	gene_body	Shared Tet and TFH	26	17.1435
Cd47	gene_body	Shared Tet and TFH	26	0.226746
Pkdcc	Distal Intergenic	Shared Tet and TFH	26	0
Trerf1	gene_body	Shared Tet and TFH	26	-11.5314
Zfp831	Distal Intergenic	Shared Tet and TFH	26	-0.586318
Eea1	gene_body	Shared Tet and TFH	25	-6.83146
Prrc2b	gene_body	Shared Tet and TFH	25	0
Slc9a9	gene_body	Shared Tet and TFH	25	-28.6596
Camk2d	gene_body	Shared Tet and TFH	24	-9.64142
Cd44	Distal Intergenic	Shared Tet and TFH	24	-9.71047
Dleu2	Distal Intergenic	Shared Tet and TFH	24	0
Elk3	gene_body	Shared Tet and TFH	24	0
Filip1l	gene_body	Shared Tet and TFH	24	-0.110266
Gm27162	gene_body	Shared Tet and TFH	24	0
Ppp2r5c	gene_body	Shared Tet and TFH	24	0
Tank	Distal Intergenic	Shared Tet and TFH	24	-9.37227
Tnfaip8	gene_body	Shared Tet and TFH	24	-7.45474
Arhgef3	gene_body	Shared Tet and TFH	23	0
Etv6	gene_body	Shared Tet and TFH	23	0
Fryl	gene_body	Shared Tet and TFH	23	0
Hivep1	gene_body	Shared Tet and TFH	23	0
Slc38a1	gene_body	Shared Tet and TFH	23	-3.23794
Stim2	gene_body	Shared Tet and TFH	23	-1.01509
Ctla4	gene_body	Shared Tet and TFH	22	0
Gm12610	Distal Intergenic	Shared Tet and TFH	22	0
Jak2	gene_body	Shared Tet and TFH	22	0.912841
Rtkn2	gene_body	Shared Tet and TFH	22	0
S100a10	Distal Intergenic	Shared Tet and TFH	22	3.73627
Sspn	Distal Intergenic	Shared Tet and TFH	22	0
Agfg1	Distal Intergenic	Shared Tet and TFH	21	0
Alpk2	gene_body	Shared Tet and TFH	21	-0.240242
Bach2	Distal Intergenic	Shared Tet and TFH	21	17.1435
Ptpn13	gene_body	Shared Tet and TFH	21	-13.099
Socs3	Distal Intergenic	Shared Tet and TFH	21	0
Tmem65	Distal Intergenic	Shared Tet and TFH	21	0
Ttc39b	gene_body	Shared Tet and TFH	21	1.09272
Camk1d	gene_body	Shared Tet and TFH	20	-0.564362
Farp1	gene_body	Shared Tet and TFH	20	-2.95783
Irf2bp2	gene_body	Shared Tet and TFH	20	0
Lrig1	gene_body	Shared Tet and TFH	20	-1.36824
Mdm1	Distal Intergenic	Shared Tet and TFH	20	0
Nfkbiz	Distal Intergenic	Shared Tet and TFH	20	-9.06514
Ube2e3	gene_body	Shared Tet and TFH	20	0
Adcy7	gene_body	Shared Tet and TFH	19	0
Ankrd6	gene_body	Shared Tet and TFH	19	-0.183113
Ifng	Distal Intergenic	Shared Tet and TFH	19	0.490039
Osbpl8	gene_body	Shared Tet and TFH	19	-6.58315
Plcl2	gene_body	Shared Tet and TFH	19	-0.614879
Rnf19a	Distal Intergenic	Shared Tet and TFH	19	-0.58016
Dapp1	gene_body	Shared Tet and TFH	18	0
Ece1	gene_body	Shared Tet and TFH	18	-0.21071
Kcnip1	gene_body	Shared Tet and TFH	18	0
Mmd	gene_body	Shared Tet and TFH	18	-0.19953
Plxnc1	gene_body	Shared Tet and TFH	18	0
Rap1b	gene_body	Shared Tet and TFH	18	-0.948005
Rasl11a	Distal Intergenic	Shared Tet and TFH	18	0
Rbpj	Distal Intergenic	Shared Tet and TFH	18	0
Utrn	gene_body	Shared Tet and TFH	18	-8.76078
Zc3h12d	gene_body	Shared Tet and TFH	18	0.112072
Adora2a	gene_body	Shared Tet and TFH	17	0
Arhgap15	Distal Intergenic	Shared Tet and TFH	17	30.9662
Atp6v1g3	Distal Intergenic	Shared Tet and TFH	17	0
Atp6v1g3	gene_body	Shared Tet and TFH	17	0
C230024C17Rik	gene_body	Shared Tet and TFH	17	0
Dock8	gene_body	Shared Tet and TFH	17	0
Eps8l3	Distal Intergenic	Shared Tet and TFH	17	0
Ets1	Distal Intergenic	Shared Tet and TFH	17	-3.36879
Galm	gene_body	Shared Tet and TFH	17	0
Max	gene_body	Shared Tet and TFH	17	-0.227586
Neb	gene_body	Shared Tet and TFH	17	0.543033
Nf2	gene_body	Shared Tet and TFH	17	0
Rps6ka1	Distal Intergenic	Shared Tet and TFH	17	0
Sipa1l2	Distal Intergenic	Shared Tet and TFH	17	0
Stim1	gene_body	Shared Tet and TFH	17	-1.64125
Zbtb1	gene_body	Shared Tet and TFH	17	0
6430710C18Rik	Distal Intergenic	Shared Tet and TFH	16	0
Calcoco1	Distal Intergenic	Shared Tet and TFH	16	0
Cxcr5	gene_body	Shared Tet and TFH	16	-0.668374
Ezh2	gene_body	Shared Tet and TFH	16	0
Gnptab	gene_body	Shared Tet and TFH	16	-0.100802
Grhl1	gene_body	Shared Tet and TFH	16	0
Hvcn1	gene_body	Shared Tet and TFH	16	0
Il21	Distal Intergenic	Shared Tet and TFH	16	-1.97622
Iqgap1	gene_body	Shared Tet and TFH	16	1.01504
Mdfic	gene_body	Shared Tet and TFH	16	0
Mllt3	gene_body	Shared Tet and TFH	16	0
Nfia	gene_body	Shared Tet and TFH	16	-11.3534
Odc1	Distal Intergenic	Shared Tet and TFH	16	-3.76592
Pdcd1	Distal Intergenic	Shared Tet and TFH	16	-1.40536
Plcl2	Distal Intergenic	Shared Tet and TFH	16	-0.614879
Rad51b	gene_body	Shared Tet and TFH	16	0
Aebp2	gene_body	Shared Tet and TFH	15	0
Aven	gene_body	Shared Tet and TFH	15	0
Hlcs	gene_body	Shared Tet and TFH	15	0
Kmt2a	gene_body	Shared Tet and TFH	15	0
Mcu	gene_body	Shared Tet and TFH	15	0
Ptpn22	gene_body	Shared Tet and TFH	15	3.20991
Scfd2	gene_body	Shared Tet and TFH	15	0
Serpina12	Distal Intergenic	Shared Tet and TFH	15	0
Setbp1	gene_body	Shared Tet and TFH	15	-4.40693
Slc25a19	Distal Intergenic	Shared Tet and TFH	15	0
Slc7a1	gene_body	Shared Tet and TFH	15	-0.588291
Smco4	Distal Intergenic	Shared Tet and TFH	15	-0.547421
Tnip3	gene_body	Shared Tet and TFH	15	0.099803
Vdac1	Distal Intergenic	Shared Tet and TFH	15	0
Abcc4	gene_body	Shared Tet and TFH	14	0
Cd40lg	gene_body	Shared Tet and TFH	14	-3.51583
Cdk6	gene_body	Shared Tet and TFH	14	-0.409532
Cubn	gene_body	Shared Tet and TFH	14	0
Dusp4	Distal Intergenic	Shared Tet and TFH	14	-0.0817526
Ipmk	gene_body	Shared Tet and TFH	14	-0.788108
Lag3	Distal Intergenic	Shared Tet and TFH	14	0
Lrig1	Distal Intergenic	Shared Tet and TFH	14	-1.36824
N4bp1	gene_body	Shared Tet and TFH	14	0
Raf1	Distal Intergenic	Shared Tet and TFH	14	-7.75111
Sik3	gene_body	Shared Tet and TFH	14	-4.03708
Slc22a15	gene_body	Shared Tet and TFH	14	-0.735974
Slc9a9	Distal Intergenic	Shared Tet and TFH	14	-28.6596
Spty2d1	Distal Intergenic	Shared Tet and TFH	14	0
Stat4	gene_body	Shared Tet and TFH	14	-0.81899
Tnfsf8	gene_body	Shared Tet and TFH	14	-38.0782
2700097O09Rik	gene_body	Shared Tet and TFH	13	0
Btg1	gene_body	Shared Tet and TFH	13	-6.04553
Cd200	Distal Intergenic	Shared Tet and TFH	13	0.271389
Celf2	gene_body	Shared Tet and TFH	13	-3.73723
Cited2	Distal Intergenic	Shared Tet and TFH	13	0
Cited2	gene_body	Shared Tet and TFH	13	0
Csrnp3	Distal Intergenic	Shared Tet and TFH	13	0
Dnajc5b	Distal Intergenic	Shared Tet and TFH	13	0
Dynll2	Distal Intergenic	Shared Tet and TFH	13	0
Enpp6	Distal Intergenic	Shared Tet and TFH	13	0
Iqgap1	Distal Intergenic	Shared Tet and TFH	13	1.01504
Jdp2	Distal Intergenic	Shared Tet and TFH	13	-0.0757862
Tead1	gene_body	Only TFH	13	0
Tnfrsf8	Distal Intergenic	Shared Tet and TFH	13	-0.144315
Tnfrsf8	gene_body	Shared Tet and TFH	13	-0.144315
Tprg	Distal Intergenic	Shared Tet and TFH	13	0
Zfp41	gene_body	Shared Tet and TFH	13	0
Adap1	gene_body	Shared Tet and TFH	12	0
Arf6	Distal Intergenic	Shared Tet and TFH	12	0
Arhgap31	gene_body	Shared Tet and TFH	12	0.216215
AU019990	gene_body	Shared Tet and TFH	12	0
Ctla4	Distal Intergenic	Shared Tet and TFH	12	0
Cx3cr1	gene_body	Shared Tet and TFH	12	0
Egln3	gene_body	Shared Tet and TFH	12	-0.28649
Gtdc1	Distal Intergenic	Shared Tet and TFH	12	-6.71583
Il10	gene_body	Shared Tet and TFH	12	3.72632
Jak2	Distal Intergenic	Shared Tet and TFH	12	0.912841
Mbnl1	Distal Intergenic	Shared Tet and TFH	12	0
Mphosph6	Distal Intergenic	Shared Tet and TFH	12	0
Ncoa2	gene_body	Shared Tet and TFH	12	0
Ndufaf6	Distal Intergenic	Shared Tet and TFH	12	0
Nrip1	Distal Intergenic	Shared Tet and TFH	12	-2.14695
Ptpn11	Distal Intergenic	Shared Tet and TFH	12	-0.401142
Reps1	gene_body	Shared Tet and TFH	12	-0.375097
Slc36a3	gene_body	Shared Tet and TFH	12	-0.154208
Spry1	Distal Intergenic	Shared Tet and TFH	12	-0.324134
Stx11	Distal Intergenic	Shared Tet and TFH	12	-5.34144
Tmem26	Distal Intergenic	Shared Tet and TFH	12	0
Utrn	Distal Intergenic	Shared Tet and TFH	12	-8.76078
A430093F15Rik	gene_body	Shared Tet and TFH	11	-0.331877
Angptl2	gene_body	Shared Tet and TFH	11	-0.360356
Cbr4	Distal Intergenic	Shared Tet and TFH	11	0
Cd82	gene_body	Shared Tet and TFH	11	0
Eea1	Distal Intergenic	Shared Tet and TFH	11	-6.83146
Gm27162	Distal Intergenic	Shared Tet and TFH	11	0
Ikzf3	gene_body	Shared Tet and TFH	11	-1.42118
Max	Distal Intergenic	Shared Tet and TFH	11	-0.227586
Ostf1	gene_body	Shared Tet and TFH	11	0
Pdhx	Distal Intergenic	Shared Tet and TFH	11	0
Rbpj	gene_body	Shared Tet and TFH	11	0
Slc12a8	gene_body	Shared Tet and TFH	11	0
Sp4	Distal Intergenic	Shared Tet and TFH	11	0
Stim2	Distal Intergenic	Shared Tet and TFH	11	-1.01509
Stx11	gene_body	Shared Tet and TFH	11	-5.34144
Tnrc6a	gene_body	Shared Tet and TFH	11	0
Tox2	Distal Intergenic	Shared Tet and TFH	11	-5.87803
Adh4	gene_body	Shared Tet and TFH	10	0
Ankrd12	gene_body	Shared Tet and TFH	10	-3.34975
Fbxw11	gene_body	Shared Tet and TFH	10	-0.979988
Gpr155	gene_body	Shared Tet and TFH	10	0
Polk	gene_body	Shared Tet and TFH	10	0
Tiam1	gene_body	Shared Tet and TFH	10	0
Tm2d1	Distal Intergenic	Shared Tet and TFH	10	0
Tm2d1	gene_body	Shared Tet and TFH	10	0
Vcpkmt	Distal Intergenic	Shared Tet and TFH	10	0
1700020N01Rik	Distal Intergenic	Shared Tet and TFH	9	0
Acot7	gene_body	Shared Tet and TFH	9	0
Atf7ip	gene_body	Shared Tet and TFH	9	0
Chst2	gene_body	Shared Tet and TFH	9	0.0579856
Cox7c	Distal Intergenic	Shared Tet and TFH	9	0
Cpm	gene_body	Only TFH	9	-0.449996
Dclk1	gene_body	Shared Tet and TFH	9	0
Dusp4	gene_body	Shared Tet and TFH	9	-0.0817526
Egr2	Distal Intergenic	Shared Tet and TFH	9	-0.226828
Gypc	gene_body	Shared Tet and TFH	9	0
Ica1l	gene_body	Shared Tet and TFH	9	0
Jdp2	gene_body	Shared Tet and TFH	9	-0.0757862
Kdm7a	gene_body	Shared Tet and TFH	9	0
Mchr1	gene_body	Shared Tet and TFH	9	0
Mcoln2	gene_body	Shared Tet and TFH	9	0
Nt5e	gene_body	Shared Tet and TFH	9	0
Pou2af1	Distal Intergenic	Shared Tet and TFH	9	-0.497861
Rap1b	Distal Intergenic	Shared Tet and TFH	9	-0.948005
Rnf157	gene_body	Shared Tet and TFH	9	-0.309763
Sdcbp2	gene_body	Shared Tet and TFH	9	0
Specc1l	gene_body	Shared Tet and TFH	9	0
Trib1	Distal Intergenic	Shared Tet and TFH	9	-0.365856
Trpm6	Distal Intergenic	Shared Tet and TFH	9	-0.219774
Ttc39b	Distal Intergenic	Shared Tet and TFH	9	1.09272
Ube2e3	Distal Intergenic	Shared Tet and TFH	9	0
Gna14	gene_body	Shared Tet and TFH	8	-0.195722
Icos	gene_body	Shared Tet and TFH	8	0
Ikzf2	Distal Intergenic	Shared Tet and TFH	8	-5.99361
Itga4	Distal Intergenic	Shared Tet and TFH	8	7.17703
Ksr2	gene_body	Shared Tet and TFH	8	0
Map3k7	Distal Intergenic	Shared Tet and TFH	8	0
Myo1d	gene_body	Shared Tet and TFH	8	-0.15784
Myo1e	gene_body	Shared Tet and TFH	8	0
Nod2	gene_body	Shared Tet and TFH	8	0
Rgs8	Distal Intergenic	Shared Tet and TFH	8	0
Tbl1xr1	gene_body	Shared Tet and TFH	8	-0.888247
Tmprss13	Distal Intergenic	Shared Tet and TFH	8	0
Ube2z	gene_body	Shared Tet and TFH	8	0
Ubr2	gene_body	Shared Tet and TFH	8	-0.156286
Vangl2	Distal Intergenic	Shared Tet and TFH	8	0
Vps13d	gene_body	Shared Tet and TFH	8	0
1700027F09Rik	Distal Intergenic	Shared Tet and TFH	7	0
1700061F12Rik	Distal Intergenic	Shared Tet and TFH	7	0
Alpk2	Distal Intergenic	Shared Tet and TFH	7	-0.240242
Amz2	gene_body	Shared Tet and TFH	7	-0.174627
Arid5b	Distal Intergenic	Shared Tet and TFH	7	-13.8367
Atf3	gene_body	Shared Tet and TFH	7	0
Auh	gene_body	Shared Tet and TFH	7	0
Bcl2l15	gene_body	Shared Tet and TFH	7	-0.0735145
C1qtnf6	gene_body	Shared Tet and TFH	7	0
Dars	Distal Intergenic	Shared Tet and TFH	7	0
Ece1	Distal Intergenic	Shared Tet and TFH	7	-0.21071
Gdi2	Distal Intergenic	Shared Tet and TFH	7	0
Itgav	gene_body	Shared Tet and TFH	7	0
Itpr1	gene_body	Only TFH	7	-1.22524
Kdm7a	Distal Intergenic	Shared Tet and TFH	7	0
Kif13a	gene_body	Only TFH	7	-0.12446
Lpin1	gene_body	Shared Tet and TFH	7	0
Lsm4	Distal Intergenic	Shared Tet and TFH	7	0
Malt1	Distal Intergenic	Shared Tet and TFH	7	-20.5667
Map2k3	gene_body	Shared Tet and TFH	7	-0.160708
Mdfic	Distal Intergenic	Shared Tet and TFH	7	0
Pgap1	Distal Intergenic	Shared Tet and TFH	7	0
Pipox	gene_body	Shared Tet and TFH	7	-0.0620078
Ppp4r4	gene_body	Shared Tet and TFH	7	0
Prrc2b	Distal Intergenic	Shared Tet and TFH	7	0
Psma6	gene_body	Shared Tet and TFH	7	0
Ptpn13	Distal Intergenic	Shared Tet and TFH	7	-13.099
Rnf157	Distal Intergenic	Shared Tet and TFH	7	-0.309763
Samd9l	gene_body	Shared Tet and TFH	7	0
Smyd3	gene_body	Shared Tet and TFH	7	-0.0922989
Tjp2	gene_body	Shared Tet and TFH	7	-0.347775
Trp53inp1	Distal Intergenic	Shared Tet and TFH	7	-1.14645
Ttc39c	gene_body	Shared Tet and TFH	7	-0.137555
1700027F09Rik	gene_body	Shared Tet and TFH	6	0
Amd1	Distal Intergenic	Shared Tet and TFH	6	-0.321243
Amz2	Distal Intergenic	Shared Tet and TFH	6	-0.174627
Axin2	Distal Intergenic	Shared Tet and TFH	6	0
Cd83	gene_body	Shared Tet and TFH	6	-0.878512
Cebpa	Distal Intergenic	Shared Tet and TFH	6	-0.182651
Cxcr5	Distal Intergenic	Shared Tet and TFH	6	-0.668374
F13a1	Distal Intergenic	Shared Tet and TFH	6	0
Fam76b	Distal Intergenic	Shared Tet and TFH	6	0
Gem	Distal Intergenic	Shared Tet and TFH	6	-0.42121
Gpr15	gene_body	Shared Tet and TFH	6	0
Gsx2	Distal Intergenic	Shared Tet and TFH	6	0
Hif1a	Distal Intergenic	Shared Tet and TFH	6	-6.45511
Hspb7	gene_body	Shared Tet and TFH	6	0
Lrrc8d	gene_body	Shared Tet and TFH	6	-0.153215
Mfap5	gene_body	Shared Tet and TFH	6	0
Mllt3	Distal Intergenic	Shared Tet and TFH	6	0
Mybpc1	gene_body	Shared Tet and TFH	6	0
Nampt	Distal Intergenic	Shared Tet and TFH	6	-1.86518
Nfkbiz	gene_body	Shared Tet and TFH	6	-9.06514
Osbpl3	Distal Intergenic	Shared Tet and TFH	6	-0.631822
Pdcd1	gene_body	Shared Tet and TFH	6	-1.40536
Rgs8	gene_body	Shared Tet and TFH	6	0
Slc19a3	Distal Intergenic	Shared Tet and TFH	6	0
Slc22a15	Distal Intergenic	Shared Tet and TFH	6	-0.735974
Socs5	gene_body	Shared Tet and TFH	6	0
Sorl1	Distal Intergenic	Shared Tet and TFH	6	0
Tatdn1	gene_body	Shared Tet and TFH	6	0
Tbx21	Distal Intergenic	Shared Tet and TFH	6	0.175484
Tbx21	gene_body	Shared Tet and TFH	6	0.175484
Tmprss6	Distal Intergenic	Shared Tet and TFH	6	0
Trpm6	gene_body	Shared Tet and TFH	6	-0.219774
Atp2b1	gene_body	Shared Tet and TFH	5	0
Bub1b	gene_body	Shared Tet and TFH	5	0
Casp3	gene_body	Shared Tet and TFH	5	0
Cebpa	gene_body	Shared Tet and TFH	5	-0.182651
Cers4	gene_body	Shared Tet and TFH	5	-0.583589
Cnot2	Distal Intergenic	Shared Tet and TFH	5	-0.299299
Cpd	gene_body	Shared Tet and TFH	5	0
Cx3cr1	Distal Intergenic	Shared Tet and TFH	5	0
Dhx35	Distal Intergenic	Shared Tet and TFH	5	0
Dusp14	gene_body	Shared Tet and TFH	5	0
E130308A19Rik	gene_body	Shared Tet and TFH	5	0
Gm16998	gene_body	Shared Tet and TFH	5	0
Grb2	Distal Intergenic	Only TFH	5	-0.408421
Gtdc1	gene_body	Shared Tet and TFH	5	-6.71583
Gypc	Distal Intergenic	Shared Tet and TFH	5	0
Ifitm3	Distal Intergenic	Shared Tet and TFH	5	0
Kcnk5	gene_body	Shared Tet and TFH	5	0
Maml2	gene_body	Only TFH	5	0
Mcoln3	gene_body	Shared Tet and TFH	5	0
Mmp10	gene_body	Shared Tet and TFH	5	0
Ncoa2	Distal Intergenic	Shared Tet and TFH	5	0
Nfil3	gene_body	Shared Tet and TFH	5	0
Nrn1	Distal Intergenic	Shared Tet and TFH	5	1.38885
Pear1	Distal Intergenic	Shared Tet and TFH	5	-0.138703
Pou2af1	gene_body	Shared Tet and TFH	5	-0.497861
Ptpn5	gene_body	Shared Tet and TFH	5	-0.473665
Rps6ka1	gene_body	Shared Tet and TFH	5	0
Rreb1	gene_body	Only TFH	5	0
Sdcbp2	Distal Intergenic	Shared Tet and TFH	5	0
Secisbp2l	Distal Intergenic	Shared Tet and TFH	5	0
Sipa1l2	gene_body	Shared Tet and TFH	5	0
Synpo	gene_body	Only TFH	5	0
Tank	gene_body	Shared Tet and TFH	5	-9.37227
Tnfsf4	gene_body	Shared Tet and TFH	5	0
Trp53inp1	gene_body	Shared Tet and TFH	5	-1.14645
Zan	gene_body	Only TFH	5	0
1700025M24Rik	Distal Intergenic	Shared Tet and TFH	4	0
1700129C05Rik	gene_body	Shared Tet and TFH	4	0
Adprm	gene_body	Shared Tet and TFH	4	0
Arhgap15	gene_body	Shared Tet and TFH	4	30.9662
Ascc1	Distal Intergenic	Only TFH	4	0
Car5b	gene_body	Shared Tet and TFH	4	0
Casp4	gene_body	Only TFH	4	-5.87885
Cbr4	gene_body	Shared Tet and TFH	4	0
Cd200	gene_body	Shared Tet and TFH	4	0.271389
Cdk6	Distal Intergenic	Shared Tet and TFH	4	-0.409532
Dars	gene_body	Shared Tet and TFH	4	0
F13a1	gene_body	Shared Tet and TFH	4	0
Gphn	gene_body	Shared Tet and TFH	4	-0.217014
Hsbp1l1	gene_body	Shared Tet and TFH	4	0
Il2rb	Distal Intergenic	Shared Tet and TFH	4	0
Itga4	gene_body	Shared Tet and TFH	4	7.17703
Itgav	Distal Intergenic	Shared Tet and TFH	4	0
Lonrf2	Distal Intergenic	Shared Tet and TFH	4	0
Mstn	Distal Intergenic	Shared Tet and TFH	4	0
Nfkb1	Distal Intergenic	Shared Tet and TFH	4	-37.9458
Nlrc5	Distal Intergenic	Shared Tet and TFH	4	0
Nrn1	gene_body	Shared Tet and TFH	4	1.38885
Pbx3	gene_body	Shared Tet and TFH	4	-8.07618
Plagl1	Distal Intergenic	Shared Tet and TFH	4	-6.59745
Prkca	gene_body	Shared Tet and TFH	4	-33.6976
Ptger4	gene_body	Only Tet+	4	-1.51839
Rnf216	gene_body	Shared Tet and TFH	4	-0.176432
Rps29	Distal Intergenic	Shared Tet and TFH	4	0
Scaf4	gene_body	Shared Tet and TFH	4	0
Setbp1	Distal Intergenic	Shared Tet and TFH	4	-4.40693
Slc38a1	Distal Intergenic	Shared Tet and TFH	4	-3.23794
Tbc1d31	Distal Intergenic	Shared Tet and TFH	4	-0.0866336
Tmem192	Distal Intergenic	Shared Tet and TFH	4	0
Tmprss6	gene_body	Shared Tet and TFH	4	0
Tnfsf4	Distal Intergenic	Shared Tet and TFH	4	0
Tnr	gene_body	Shared Tet and TFH	4	0
Tomm20	Distal Intergenic	Shared Tet and TFH	4	0
Vmp1	gene_body	Shared Tet and TFH	4	0
1700061F12Rik	gene_body	Shared Tet and TFH	3	0
Agfg1	gene_body	Shared Tet and TFH	3	0
Ankrd54	Distal Intergenic	Only TFH	3	0
Ankrd55	gene_body	Only TFH	3	-0.270148
C230024C17Rik	Distal Intergenic	Shared Tet and TFH	3	0
Cd40lg	Distal Intergenic	Shared Tet and TFH	3	-3.51583
Cd86	Distal Intergenic	Only TFH	3	0
Cers4	Distal Intergenic	Shared Tet and TFH	3	-0.583589
Cpm	Distal Intergenic	Only TFH	3	-0.449996
Dlg2	gene_body	Only TFH	3	0.146231
Fgd6	gene_body	Shared Tet and TFH	3	0
Gabpb1	gene_body	Shared Tet and TFH	3	-3.96761
Gm5148	gene_body	Shared Tet and TFH	3	0
Gna13	gene_body	Only TFH	3	-4.76665
Gphn	Distal Intergenic	Shared Tet and TFH	3	-0.217014
Gucd1	gene_body	Only TFH	3	0
Gzmk	Distal Intergenic	Only TFH	3	0
Jmjd1c	gene_body	Only TFH	3	-0.62386
Matn2	gene_body	Only TFH	3	0
Mcu	Distal Intergenic	Shared Tet and TFH	3	0
Osbpl8	Distal Intergenic	Shared Tet and TFH	3	-6.58315
Rabgef1	gene_body	Shared Tet and TFH	3	-0.17477
Secisbp2l	gene_body	Shared Tet and TFH	3	0
Slc25a19	gene_body	Shared Tet and TFH	3	0
Slc7a1	Distal Intergenic	Shared Tet and TFH	3	-0.588291
Slc9b2	gene_body	Only TFH	3	0
Stat3	gene_body	Shared Tet and TFH	3	-12.713
Stk32c	gene_body	Only TFH	3	0
Tmem26	gene_body	Shared Tet and TFH	3	0
Tnip3	Distal Intergenic	Shared Tet and TFH	3	0.099803
Tomm20	gene_body	Shared Tet and TFH	3	0
Trerf1	Distal Intergenic	Shared Tet and TFH	3	-11.5314
Tsen2	gene_body	Shared Tet and TFH	3	0
Ubl3	gene_body	Shared Tet and TFH	3	-1.17453
Akap11	gene_body	Shared Tet and TFH	2	0
Alcam	Distal Intergenic	Only Tet+	2	0
Anxa2	Distal Intergenic	Only TFH	2	0
Casp3	Distal Intergenic	Shared Tet and TFH	2	0
Cd52	Distal Intergenic	Shared Tet and TFH	2	-9.17311
Cd52	gene_body	Shared Tet and TFH	2	-9.17311
Csf1	Distal Intergenic	Shared Tet and TFH	2	-0.0732305
Dapp1	Distal Intergenic	Shared Tet and TFH	2	0
Dynll2	gene_body	Shared Tet and TFH	2	0
Fer1l6	gene_body	Shared Tet and TFH	2	0
Fyn	Distal Intergenic	Shared Tet and TFH	2	-11.7427
Gbp6	Distal Intergenic	Shared Tet and TFH	2	0
Gm10804	gene_body	Only TFH	2	0
Gtpbp4	gene_body	Only TFH	2	0
Id2	Distal Intergenic	Shared Tet and TFH	2	2.51887
Malt1	gene_body	Shared Tet and TFH	2	-20.5667
Ngly1	Distal Intergenic	Only TFH	2	0
Plagl1	gene_body	Shared Tet and TFH	2	-6.59745
Plcb4	gene_body	Only TFH	2	-3.59096
Plxnc1	Distal Intergenic	Shared Tet and TFH	2	0
Ralgps1	gene_body	Shared Tet and TFH	2	-0.191935
Scaf4	Distal Intergenic	Shared Tet and TFH	2	0
Slco3a1	Distal Intergenic	Shared Tet and TFH	2	-2.1716
Tbc1d31	gene_body	Shared Tet and TFH	2	-0.0866336
Tg	gene_body	Shared Tet and TFH	2	0
Xkr6	Distal Intergenic	Only TFH	2	0
Zc3h12d	Distal Intergenic	Shared Tet and TFH	2	0.112072
1700129C05Rik	Distal Intergenic	Shared Tet and TFH	1	0
Alcam	gene_body	Only Tet+	1	0
Bhlhe40	gene_body	Only Tet+	1	0
C2cd2	gene_body	Only TFH	1	0
Camk2d	Distal Intergenic	Shared Tet and TFH	1	-9.64142
Cd86	gene_body	Only TFH	1	0
Dleu2	gene_body	Shared Tet and TFH	1	0
Dusp14	Distal Intergenic	Shared Tet and TFH	1	0
Egr4	gene_body	Only Tet+	1	0
Enpp6	gene_body	Shared Tet and TFH	1	0
Ercc6l2	Distal Intergenic	Only TFH	1	0
Ercc6l2	gene_body	Only TFH	1	0
Fosb	Distal Intergenic	Shared Tet and TFH	1	-8.64043
Grb2	gene_body	Only TFH	1	-0.408421
Hivep2	Distal Intergenic	Shared Tet and TFH	1	-19.7552
Lmnb1	Distal Intergenic	Shared Tet and TFH	1	0
Mpp2	gene_body	Only TFH	1	0
Nek6	gene_body	Only TFH	1	0
Npas2	gene_body	Only Tet+	1	0
Nt5e	Distal Intergenic	Shared Tet and TFH	1	0
Pou2f2	gene_body	Only TFH	1	0.328751
Ptger4	Distal Intergenic	Only Tet+	1	-1.51839
Reps1	Distal Intergenic	Shared Tet and TFH	1	-0.375097
Rtn3	gene_body	Only Tet+	1	0
S100a10	gene_body	Shared Tet and TFH	1	3.73627
Samd9l	Distal Intergenic	Shared Tet and TFH	1	0
Slc25a12	gene_body	Only TFH	1	0
Synpo	Distal Intergenic	Only TFH	1	0
Tgfb1	gene_body	Only Tet+	1	-0.165797
Tmem65	gene_body	Shared Tet and TFH	1	0
Tsen2	Distal Intergenic	Shared Tet and TFH	1	0
