# Supplementary material for: T-follicular helper cells are epigenetically poised to transdifferentiate into T-regulatory type 1 cells
Source: eLife. 2024 Nov 22;13:RP97665. doi: 10.7554/eLife.97665 (PMC11584177; doi:10.7554/eLife.97665)
Supplement: Figure 7—source data 1. [file elife-97665-fig7-data1.xlsx]

## Sheet: Sheet1
p_val	scRNAseq_avg_log2FC	pct.1	pct.2	p_val_adj	gene	gene_name	chr.x	start.x	stop.x	q-value.x	mean_methylation_difference.x	#CpGs.x	mean_g1.x	mean_g2.x	Region.ID.x	fold.TFH_Meth	type.x	seqnames.x	end.x	fold_Meth_Tet	chr.y	start.y	stop.y	q-value.y	mean_methylation_difference.y	#CpGs.y	mean_g1.y	mean_g2.y	Region.ID.y	type.y	seqnames.y	end.y	fold_tfh	status
0	-28.6596	0.499	0.904	0	Slc9a9	Slc9a9	chr9	94606992	94607216	0.0079205	0.429707	18	0.52739	0.097688	chr9:94606992-94607216	-2.43262	Distal Intergenic	chr9	94607216	-2.43262	chr9	94606832	94607216	0.0018046	0.439363	20	0.55146	0.1121	chr9:94606832-94607216	Distal Intergenic	chr9	94607216	-2.29847	Shared
1.23639e-265	-45.2428	0.662	0.919	3.99168e-261	Tox	Tox															chr4	6975744	6976131	0.56111	-0.259452	20	0.10278	0.36223	chr4:6975744-6976131	gene_body	chr4	6976131	1.81735	only TFH
1.23639e-265	-45.2428	0.662	0.919	3.99168e-261	Tox	Tox															chr4	6978683	6980414	0.010014	-0.262877	40	0.28563	0.54851	chr4:6978683-6980414	gene_body	chr4	6980414	0.94137	only TFH
3.33187e-200	7.17703	0.569	0.242	1.0757e-195	Itga4	Itga4															chr2	79127207	79127776	0.02612	-0.322790	16	0.094486	0.41728	chr2:79127207-79127776	Distal Intergenic	chr2	79127776	2.14284	only TFH
1.79523e-186	-5.87803	0.095	0.447	5.79591e-182	Tox2	Tox2	chr2	163165924	163166624	1.3308E-6	0.481603	29	0.75297	0.27136	chr2:163165924-163166624	-1.47238	Distal Intergenic	chr2	163166624	-1.47238	chr2	163166001	163166909	2.7949000000000001E-6	0.425326	36	0.7721	0.34677	chr2:163166001-163166909	Distal Intergenic	chr2	163166909	-1.15481	Shared
1.79523e-186	-5.87803	0.095	0.447	5.79591e-182	Tox2	Tox2	chr2	163165924	163166624	1.3308E-6	0.481603	29	0.75297	0.27136	chr2:163165924-163166624	-1.47238	Distal Intergenic	chr2	163166624	-1.47238	chr2	163240008	163240386	6.1722000000000002E-7	0.392796	17	0.91754	0.52474	chr2:163240008-163240386	gene_body	chr2	163240386	-0.806168	Shared
6.25541e-167	-11.5314	0.225	0.542	2.01956e-162	Trerf1	Trerf1															chr17	47123709	47124987	5.8345999999999997E-9	0.584849	56	0.89727	0.66027	chr17:47123709-47124987	Distal Intergenic	chr17	47124987	-0.442486	only TFH
6.25541e-167	-11.5314	0.225	0.542	2.01956e-162	Trerf1	Trerf1															chr17	47162334	47162864	7.9607999999999998E-2	0.482399	16	0.65125	0.16885	chr17:47162334-47162864	gene_body	chr17	47162864	-1.94747	only TFH
6.25541e-167	-11.5314	0.225	0.542	2.01956e-162	Trerf1	Trerf1															chr17	47189573	47190356	3.8011999999999998E-11	0.726649	24	0.79692	0.070266	chr17:47189573-47190356	gene_body	chr17	47190356	-3.50354	only TFH
8.3728e-160	-4.76665	0.247	0.539	2.70316e-155	Gna13	Gna13															chr11	109356827	109357294	7.9162000000000005E-12	0.564836	29	0.7625	0.19767	chr11:109356827-109357294	gene_body	chr11	109357294	-1.94764	only TFH
2.78225e-134	-9.71047	0.357	0.633	8.9825e-130	Cd44	Cd44	chr2	102852735	102853664	2.2805E-6	0.533073	26	0.63057	0.097495	chr2:102852735-102853664	-2.69326	gene_body	chr2	102853664	-2.69326	chr2	102853031	102853664	2.7801999999999999E-5	0.544930	22	0.63799	0.09306	chr2:102853031-102853664	gene_body	chr2	102853664	-2.7773	Shared
2.78225e-134	-9.71047	0.357	0.633	8.9825e-130	Cd44	Cd44	chr2	102852735	102853664	2.2805E-6	0.533073	26	0.63057	0.097495	chr2:102852735-102853664	-2.69326	gene_body	chr2	102853664	-2.69326	chr2	102864887	102865377	0.77153000000000005	0.614042	10	0.75852	0.14447	chr2:102864887-102865377	gene_body	chr2	102865377	-2.39242	Shared
2.78225e-134	-9.71047	0.357	0.633	8.9825e-130	Cd44	Cd44	chr2	102852735	102853664	2.2805E-6	0.533073	26	0.63057	0.097495	chr2:102852735-102853664	-2.69326	gene_body	chr2	102853664	-2.69326	chr2	102900385	102900780	0.97875999999999996	0.146438	18	0.18532	0.038878	chr2:102900385-102900780	gene_body	chr2	102900780	-2.25299	Shared
2.78225e-134	-9.71047	0.357	0.633	8.9825e-130	Cd44	Cd44	chr2	102852735	102853664	2.2805E-6	0.533073	26	0.63057	0.097495	chr2:102852735-102853664	-2.69326	gene_body	chr2	102853664	-2.69326	chr2	102956628	102957516	2.1713E-4	0.528376	24	0.70018	0.1718	chr2:102956628-102957516	Distal Intergenic	chr2	102957516	-2.027	Shared
2.78225e-134	-9.71047	0.357	0.633	8.9825e-130	Cd44	Cd44	chr2	102956628	102957515	4.9982999999999999E-5	0.520678	23	0.69253	0.17185	chr2:102956628-102957515	-2.01073	Distal Intergenic	chr2	102957515	-2.01073	chr2	102853031	102853664	2.7801999999999999E-5	0.544930	22	0.63799	0.09306	chr2:102853031-102853664	gene_body	chr2	102853664	-2.7773	Shared
2.78225e-134	-9.71047	0.357	0.633	8.9825e-130	Cd44	Cd44	chr2	102956628	102957515	4.9982999999999999E-5	0.520678	23	0.69253	0.17185	chr2:102956628-102957515	-2.01073	Distal Intergenic	chr2	102957515	-2.01073	chr2	102864887	102865377	0.77153000000000005	0.614042	10	0.75852	0.14447	chr2:102864887-102865377	gene_body	chr2	102865377	-2.39242	Shared
2.78225e-134	-9.71047	0.357	0.633	8.9825e-130	Cd44	Cd44	chr2	102956628	102957515	4.9982999999999999E-5	0.520678	23	0.69253	0.17185	chr2:102956628-102957515	-2.01073	Distal Intergenic	chr2	102957515	-2.01073	chr2	102900385	102900780	0.97875999999999996	0.146438	18	0.18532	0.038878	chr2:102900385-102900780	gene_body	chr2	102900780	-2.25299	Shared
2.78225e-134	-9.71047	0.357	0.633	8.9825e-130	Cd44	Cd44	chr2	102956628	102957515	4.9982999999999999E-5	0.520678	23	0.69253	0.17185	chr2:102956628-102957515	-2.01073	Distal Intergenic	chr2	102957515	-2.01073	chr2	102956628	102957516	2.1713E-4	0.528376	24	0.70018	0.1718	chr2:102956628-102957516	Distal Intergenic	chr2	102957516	-2.027	Shared
1.77407e-130	-7.58476	0.245	0.51	5.7276e-126	Stk39	Stk39	chr2	68289210	68289551	3.8805999999999998E-11	0.617029	20	0.7241	0.10708	chr2:68289210-68289551	-2.7575	gene_body	chr2	68289551	-2.7575	chr2	68325196	68326138	8.4511999999999999E-4	0.398669	23	0.82188	0.42321	chr2:68325196-68326138	gene_body	chr2	68326138	-0.957554	Shared
1.77407e-130	-7.58476	0.245	0.51	5.7276e-126	Stk39	Stk39	chr2	68289210	68289551	3.8805999999999998E-11	0.617029	20	0.7241	0.10708	chr2:68289210-68289551	-2.7575	gene_body	chr2	68289551	-2.7575	chr2	68383837	68384159	0.00079229	0.442017	10	0.76032	0.3183	chr2:68383837-68384159	gene_body	chr2	68384159	-1.25622	Shared
1.11705e-127	-11.7427	0.636	0.818	3.60641e-123	Fyn	Fyn	chr10	39413237	39413470	0.0019603	0.394357	12	0.49375	0.099398	chr10:39413237-39413470	-2.31249	gene_body	chr10	39413470	-2.31249	chr10	39430193	39431138	8.6573999999999998E-2	0.467693	34	0.68313	0.21544	chr10:39430193-39431138	gene_body	chr10	39431138	-1.66487	Shared
1.11705e-127	-11.7427	0.636	0.818	3.60641e-123	Fyn	Fyn	chr10	39413237	39413470	0.0019603	0.394357	12	0.49375	0.099398	chr10:39413237-39413470	-2.31249	gene_body	chr10	39413470	-2.31249	chr10	39435215	39436310	8.0197999999999995E-10	0.535897	32	0.65765	0.12175	chr10:39435215-39436310	gene_body	chr10	39436310	-2.4334	Shared
1.11705e-127	-11.7427	0.636	0.818	3.60641e-123	Fyn	Fyn	chr10	39413237	39413470	0.0019603	0.394357	12	0.49375	0.099398	chr10:39413237-39413470	-2.31249	gene_body	chr10	39413470	-2.31249	chr10	39433723	39434072	0.004615	0.551819	10	0.81565	0.26383	chr10:39433723-39434072	gene_body	chr10	39434072	-1.62834	Shared
1.11705e-127	-11.7427	0.636	0.818	3.60641e-123	Fyn	Fyn	chr10	39413237	39413470	0.0019603	0.394357	12	0.49375	0.099398	chr10:39413237-39413470	-2.31249	gene_body	chr10	39413470	-2.31249	chr10	39456576	39457025	0.0056889	0.450102	10	0.63143	0.18133	chr10:39456576-39457025	gene_body	chr10	39457025	-1.80001	Shared
1.11705e-127	-11.7427	0.636	0.818	3.60641e-123	Fyn	Fyn	chr10	39413237	39413470	0.0019603	0.394357	12	0.49375	0.099398	chr10:39413237-39413470	-2.31249	gene_body	chr10	39413470	-2.31249	chr10	39467806	39469700	3.8445000000000002E-5	0.607326	50	0.55139	0.13785	chr10:39467806-39469700	gene_body	chr10	39469700	-1.99997	Shared
1.11705e-127	-11.7427	0.636	0.818	3.60641e-123	Fyn	Fyn	chr10	39413237	39413470	0.0019603	0.394357	12	0.49375	0.099398	chr10:39413237-39413470	-2.31249	gene_body	chr10	39413470	-2.31249	chr10	39469909	39470897	9.6915000000000007E-7	0.626545	25	0.68022	0.053678	chr10:39469909-39470897	gene_body	chr10	39470897	-3.6636	Shared
1.11705e-127	-11.7427	0.636	0.818	3.60641e-123	Fyn	Fyn	chr10	39413237	39413470	0.0019603	0.394357	12	0.49375	0.099398	chr10:39413237-39413470	-2.31249	gene_body	chr10	39413470	-2.31249	chr10	39478708	39479307	0.00014791	0.524604	16	0.69596	0.17135	chr10:39478708-39479307	gene_body	chr10	39479307	-2.02206	Shared
1.11705e-127	-11.7427	0.636	0.818	3.60641e-123	Fyn	Fyn	chr10	39413237	39413470	0.0019603	0.394357	12	0.49375	0.099398	chr10:39413237-39413470	-2.31249	gene_body	chr10	39413470	-2.31249	chr10	39479760	39481539	8.9336999999999996E-16	0.606397	38	0.77311	0.16671	chr10:39479760-39481539	gene_body	chr10	39481539	-2.21333	Shared
1.11705e-127	-11.7427	0.636	0.818	3.60641e-123	Fyn	Fyn	chr10	39430115	39431138	2.2893999999999999E-4	0.501862	36	0.69251	0.19065	chr10:39430115-39431138	-1.86091	gene_body	chr10	39431138	-1.86091	chr10	39430193	39431138	8.6573999999999998E-2	0.467693	34	0.68313	0.21544	chr10:39430193-39431138	gene_body	chr10	39431138	-1.66487	Shared
1.11705e-127	-11.7427	0.636	0.818	3.60641e-123	Fyn	Fyn	chr10	39430115	39431138	2.2893999999999999E-4	0.501862	36	0.69251	0.19065	chr10:39430115-39431138	-1.86091	gene_body	chr10	39431138	-1.86091	chr10	39435215	39436310	8.0197999999999995E-10	0.535897	32	0.65765	0.12175	chr10:39435215-39436310	gene_body	chr10	39436310	-2.4334	Shared
1.11705e-127	-11.7427	0.636	0.818	3.60641e-123	Fyn	Fyn	chr10	39430115	39431138	2.2893999999999999E-4	0.501862	36	0.69251	0.19065	chr10:39430115-39431138	-1.86091	gene_body	chr10	39431138	-1.86091	chr10	39433723	39434072	0.004615	0.551819	10	0.81565	0.26383	chr10:39433723-39434072	gene_body	chr10	39434072	-1.62834	Shared
1.11705e-127	-11.7427	0.636	0.818	3.60641e-123	Fyn	Fyn	chr10	39430115	39431138	2.2893999999999999E-4	0.501862	36	0.69251	0.19065	chr10:39430115-39431138	-1.86091	gene_body	chr10	39431138	-1.86091	chr10	39456576	39457025	0.0056889	0.450102	10	0.63143	0.18133	chr10:39456576-39457025	gene_body	chr10	39457025	-1.80001	Shared
1.11705e-127	-11.7427	0.636	0.818	3.60641e-123	Fyn	Fyn	chr10	39430115	39431138	2.2893999999999999E-4	0.501862	36	0.69251	0.19065	chr10:39430115-39431138	-1.86091	gene_body	chr10	39431138	-1.86091	chr10	39467806	39469700	3.8445000000000002E-5	0.607326	50	0.55139	0.13785	chr10:39467806-39469700	gene_body	chr10	39469700	-1.99997	Shared
1.11705e-127	-11.7427	0.636	0.818	3.60641e-123	Fyn	Fyn	chr10	39430115	39431138	2.2893999999999999E-4	0.501862	36	0.69251	0.19065	chr10:39430115-39431138	-1.86091	gene_body	chr10	39431138	-1.86091	chr10	39469909	39470897	9.6915000000000007E-7	0.626545	25	0.68022	0.053678	chr10:39469909-39470897	gene_body	chr10	39470897	-3.6636	Shared
1.11705e-127	-11.7427	0.636	0.818	3.60641e-123	Fyn	Fyn	chr10	39430115	39431138	2.2893999999999999E-4	0.501862	36	0.69251	0.19065	chr10:39430115-39431138	-1.86091	gene_body	chr10	39431138	-1.86091	chr10	39478708	39479307	0.00014791	0.524604	16	0.69596	0.17135	chr10:39478708-39479307	gene_body	chr10	39479307	-2.02206	Shared
1.11705e-127	-11.7427	0.636	0.818	3.60641e-123	Fyn	Fyn	chr10	39430115	39431138	2.2893999999999999E-4	0.501862	36	0.69251	0.19065	chr10:39430115-39431138	-1.86091	gene_body	chr10	39431138	-1.86091	chr10	39479760	39481539	8.9336999999999996E-16	0.606397	38	0.77311	0.16671	chr10:39479760-39481539	gene_body	chr10	39481539	-2.21333	Shared
1.11705e-127	-11.7427	0.636	0.818	3.60641e-123	Fyn	Fyn	chr10	39434963	39435375	0.012232	0.410280	10	0.42172	0.011436	chr10:39434963-39435375	-5.20463	gene_body	chr10	39435375	-5.20463	chr10	39430193	39431138	8.6573999999999998E-2	0.467693	34	0.68313	0.21544	chr10:39430193-39431138	gene_body	chr10	39431138	-1.66487	Shared
1.11705e-127	-11.7427	0.636	0.818	3.60641e-123	Fyn	Fyn	chr10	39434963	39435375	0.012232	0.410280	10	0.42172	0.011436	chr10:39434963-39435375	-5.20463	gene_body	chr10	39435375	-5.20463	chr10	39435215	39436310	8.0197999999999995E-10	0.535897	32	0.65765	0.12175	chr10:39435215-39436310	gene_body	chr10	39436310	-2.4334	Shared
1.11705e-127	-11.7427	0.636	0.818	3.60641e-123	Fyn	Fyn	chr10	39434963	39435375	0.012232	0.410280	10	0.42172	0.011436	chr10:39434963-39435375	-5.20463	gene_body	chr10	39435375	-5.20463	chr10	39433723	39434072	0.004615	0.551819	10	0.81565	0.26383	chr10:39433723-39434072	gene_body	chr10	39434072	-1.62834	Shared
1.11705e-127	-11.7427	0.636	0.818	3.60641e-123	Fyn	Fyn	chr10	39434963	39435375	0.012232	0.410280	10	0.42172	0.011436	chr10:39434963-39435375	-5.20463	gene_body	chr10	39435375	-5.20463	chr10	39456576	39457025	0.0056889	0.450102	10	0.63143	0.18133	chr10:39456576-39457025	gene_body	chr10	39457025	-1.80001	Shared
1.11705e-127	-11.7427	0.636	0.818	3.60641e-123	Fyn	Fyn	chr10	39434963	39435375	0.012232	0.410280	10	0.42172	0.011436	chr10:39434963-39435375	-5.20463	gene_body	chr10	39435375	-5.20463	chr10	39467806	39469700	3.8445000000000002E-5	0.607326	50	0.55139	0.13785	chr10:39467806-39469700	gene_body	chr10	39469700	-1.99997	Shared
1.11705e-127	-11.7427	0.636	0.818	3.60641e-123	Fyn	Fyn	chr10	39434963	39435375	0.012232	0.410280	10	0.42172	0.011436	chr10:39434963-39435375	-5.20463	gene_body	chr10	39435375	-5.20463	chr10	39469909	39470897	9.6915000000000007E-7	0.626545	25	0.68022	0.053678	chr10:39469909-39470897	gene_body	chr10	39470897	-3.6636	Shared
1.11705e-127	-11.7427	0.636	0.818	3.60641e-123	Fyn	Fyn	chr10	39434963	39435375	0.012232	0.410280	10	0.42172	0.011436	chr10:39434963-39435375	-5.20463	gene_body	chr10	39435375	-5.20463	chr10	39478708	39479307	0.00014791	0.524604	16	0.69596	0.17135	chr10:39478708-39479307	gene_body	chr10	39479307	-2.02206	Shared
1.11705e-127	-11.7427	0.636	0.818	3.60641e-123	Fyn	Fyn	chr10	39434963	39435375	0.012232	0.410280	10	0.42172	0.011436	chr10:39434963-39435375	-5.20463	gene_body	chr10	39435375	-5.20463	chr10	39479760	39481539	8.9336999999999996E-16	0.606397	38	0.77311	0.16671	chr10:39479760-39481539	gene_body	chr10	39481539	-2.21333	Shared
8.38805e-120	-3.34975	0.44	0.67	2.70808e-115	Ankrd12	Ankrd12	chr17	66065258	66065671	0.0096646	0.415569	10	0.5772	0.16163	chr17:66065258-66065671	-1.83638	gene_body	chr17	66065671	-1.83638	chr17	66073387	66074318	3.3901999999999999E-3	0.418914	38	0.69599	0.27708	chr17:66073387-66074318	gene_body	chr17	66074318	-1.32876	Shared
8.38805e-120	-3.34975	0.44	0.67	2.70808e-115	Ankrd12	Ankrd12	chr17	66073658	66074053	3.0550999999999998E-2	0.557138	16	0.70958	0.15244	chr17:66073658-66074053	-2.21872	gene_body	chr17	66074053	-2.21872	chr17	66073387	66074318	3.3901999999999999E-3	0.418914	38	0.69599	0.27708	chr17:66073387-66074318	gene_body	chr17	66074318	-1.32876	Shared
8.32483e-116	-9.06514	0.193	0.451	2.68767e-111	Nfkbiz	Nfkbiz	chr16	55722917	55723368	1.7187999999999998E-2	0.632898	16	0.78586	0.15297	chr16:55722917-55723368	-2.36102	Distal Intergenic	chr16	55723368	-2.36102	chr16	55731087	55731350	5.0003000000000005E-4	0.691260	16	0.79233	0.10107	chr16:55731087-55731350	Distal Intergenic	chr16	55731350	-2.97075	Shared
8.32483e-116	-9.06514	0.193	0.451	2.68767e-111	Nfkbiz	Nfkbiz	chr16	55722917	55723368	1.7187999999999998E-2	0.632898	16	0.78586	0.15297	chr16:55722917-55723368	-2.36102	Distal Intergenic	chr16	55723368	-2.36102	chr16	55733784	55734155	0.00018213	0.614339	10	0.83756	0.22322	chr16:55733784-55734155	Distal Intergenic	chr16	55734155	-1.90773	Shared
8.32483e-116	-9.06514	0.193	0.451	2.68767e-111	Nfkbiz	Nfkbiz	chr16	55722917	55723368	1.7187999999999998E-2	0.632898	16	0.78586	0.15297	chr16:55722917-55723368	-2.36102	Distal Intergenic	chr16	55723368	-2.36102	chr16	55756865	55757470	1.0288E-22	0.731314	34	0.77759	0.046272	chr16:55756865-55757470	Distal Intergenic	chr16	55757470	-4.0708	Shared
8.32483e-116	-9.06514	0.193	0.451	2.68767e-111	Nfkbiz	Nfkbiz	chr16	55733784	55734155	0.00016772	0.718553	10	0.83756	0.11901	chr16:55733784-55734155	-2.81511	Distal Intergenic	chr16	55734155	-2.81511	chr16	55731087	55731350	5.0003000000000005E-4	0.691260	16	0.79233	0.10107	chr16:55731087-55731350	Distal Intergenic	chr16	55731350	-2.97075	Shared
8.32483e-116	-9.06514	0.193	0.451	2.68767e-111	Nfkbiz	Nfkbiz	chr16	55733784	55734155	0.00016772	0.718553	10	0.83756	0.11901	chr16:55733784-55734155	-2.81511	Distal Intergenic	chr16	55734155	-2.81511	chr16	55733784	55734155	0.00018213	0.614339	10	0.83756	0.22322	chr16:55733784-55734155	Distal Intergenic	chr16	55734155	-1.90773	Shared
8.32483e-116	-9.06514	0.193	0.451	2.68767e-111	Nfkbiz	Nfkbiz	chr16	55733784	55734155	0.00016772	0.718553	10	0.83756	0.11901	chr16:55733784-55734155	-2.81511	Distal Intergenic	chr16	55734155	-2.81511	chr16	55756865	55757470	1.0288E-22	0.731314	34	0.77759	0.046272	chr16:55756865-55757470	Distal Intergenic	chr16	55757470	-4.0708	Shared
8.32483e-116	-9.06514	0.193	0.451	2.68767e-111	Nfkbiz	Nfkbiz	chr16	55756865	55757470	6.9425999999999995E-23	0.710792	34	0.77759	0.066793	chr16:55756865-55757470	-3.54124	Distal Intergenic	chr16	55757470	-3.54124	chr16	55731087	55731350	5.0003000000000005E-4	0.691260	16	0.79233	0.10107	chr16:55731087-55731350	Distal Intergenic	chr16	55731350	-2.97075	Shared
8.32483e-116	-9.06514	0.193	0.451	2.68767e-111	Nfkbiz	Nfkbiz	chr16	55756865	55757470	6.9425999999999995E-23	0.710792	34	0.77759	0.066793	chr16:55756865-55757470	-3.54124	Distal Intergenic	chr16	55757470	-3.54124	chr16	55733784	55734155	0.00018213	0.614339	10	0.83756	0.22322	chr16:55733784-55734155	Distal Intergenic	chr16	55734155	-1.90773	Shared
8.32483e-116	-9.06514	0.193	0.451	2.68767e-111	Nfkbiz	Nfkbiz	chr16	55756865	55757470	6.9425999999999995E-23	0.710792	34	0.77759	0.066793	chr16:55756865-55757470	-3.54124	Distal Intergenic	chr16	55757470	-3.54124	chr16	55756865	55757470	1.0288E-22	0.731314	34	0.77759	0.046272	chr16:55756865-55757470	Distal Intergenic	chr16	55757470	-4.0708	Shared
3.21651e-110	-6.45511	0.369	0.614	1.03845e-105	Hif1a	Hif1a	chr12	73755666	73755929	1.0774000000000001E-2	0.712692	12	0.87553	0.16283	chr12:73755666-73755929	-2.42679	gene_body	chr12	73755929	-2.42679	chr12	73745875	73746329	0.00099545	0.343082	15	0.77481	0.43173	chr12:73745875-73746329	gene_body	chr12	73746329	-0.843713	Shared
3.21651e-110	-6.45511	0.369	0.614	1.03845e-105	Hif1a	Hif1a	chr12	73755666	73755929	1.0774000000000001E-2	0.712692	12	0.87553	0.16283	chr12:73755666-73755929	-2.42679	gene_body	chr12	73755929	-2.42679	chr12	73755666	73755929	4.9332999999999998E-3	0.798506	12	0.87553	0.077019	chr12:73755666-73755929	gene_body	chr12	73755929	-3.50687	Shared
3.21651e-110	-6.45511	0.369	0.614	1.03845e-105	Hif1a	Hif1a	chr12	73755666	73755929	1.0774000000000001E-2	0.712692	12	0.87553	0.16283	chr12:73755666-73755929	-2.42679	gene_body	chr12	73755929	-2.42679	chr12	73794145	73794426	0.00014773	0.207325	26	0.25572	0.048395	chr12:73794145-73794426	gene_body	chr12	73794426	-2.40164	Shared
1.72254e-105	-9.37227	0.366	0.605	5.56123e-101	Tank	Tank	chr2	61563250	61564279	5.0031999999999997E-15	0.619632	33	0.74953	0.12989	chr2:61563250-61564279	-2.5287	Distal Intergenic	chr2	61564279	-2.5287	chr2	61563251	61563745	3.8100999999999999E-4	0.588854	15	0.63393	0.045073	chr2:61563251-61563745	Distal Intergenic	chr2	61563745	-3.81399	Shared
1.2979e-101	-18.7191	0.335	0.578	4.19026e-97	Jarid2	Jarid2	chr13	44770853	44771332	5.7080000000000004E-3	0.599932	10	0.63887	0.038942	chr13:44770853-44771332	-4.03612	gene_body	chr13	44771332	-4.03612	chr13	44770443	44771332	1.0296E-2	0.557102	15	0.66463	0.10753	chr13:44770443-44771332	gene_body	chr13	44771332	-2.62781	Shared
1.68333e-97	3.73627	0.349	0.154	5.43462e-93	S100a10	S100a10															chr3	93597652	93598247	2.1836999999999999E-7	0.561873	20	0.74345	0.18157	chr3:93597652-93598247	Distal Intergenic	chr3	93598247	-2.03371	only TFH
2.02763e-95	-1.40536	0.051	0.233	6.54619e-91	Pdcd1	Pdcd1	chr1	94042333	94042935	2.4204999999999999E-5	0.524561	27	0.6999	0.17534	chr1:94042333-94042935	-1.99699	gene_body	chr1	94042935	-1.99699	chr1	94042217	94043166	7.1456000000000006E-14	0.620419	38	0.75529	0.13487	chr1:94042217-94043166	gene_body	chr1	94043166	-2.48546	Shared
2.02763e-95	-1.40536	0.051	0.233	6.54619e-91	Pdcd1	Pdcd1	chr1	94046566	94047074	0.0033	0.625314	10	0.70284	0.077526	chr1:94046566-94047074	-3.18044	gene_body	chr1	94047074	-3.18044	chr1	94042217	94043166	7.1456000000000006E-14	0.620419	38	0.75529	0.13487	chr1:94042217-94043166	gene_body	chr1	94043166	-2.48546	Shared
3.56853e-90	-6.77694	0.438	0.663	1.1521e-85	Asap1	Asap1															chr15	64234663	64235420	9.1224000000000006E-5	0.521716	20	0.6003	0.078583	chr15:64234663-64235420	gene_body	chr15	64235420	-2.93339	only TFH
3.56853e-90	-6.77694	0.438	0.663	1.1521e-85	Asap1	Asap1															chr15	64246713	64247027	0.00098355	0.444597	10	0.64786	0.20326	chr15:64246713-64247027	gene_body	chr15	64247027	-1.67236	only TFH
3.56853e-90	-6.77694	0.438	0.663	1.1521e-85	Asap1	Asap1															chr15	64249162	64249398	0.21107000000000001	0.465867	11	0.81667	0.3508	chr15:64249162-64249398	gene_body	chr15	64249398	-1.2191	only TFH
1.77736e-78	-2.1716	0.183	0.379	5.73822e-74	Slco3a1	Slco3a1	chr7	74527658	74528150	0.31641999999999998	0.472513	12	0.72619	0.25368	chr7:74527658-74528150	-1.51734	gene_body	chr7	74528150	-1.51734														only TR1
9.59199e-76	-5.87885	0.211	0.404	3.09678e-71	Casp4	Casp4															chr9	5311276	5311815	0.021593	0.512283	10	0.67804	0.16576	chr9:5311276-5311815	gene_body	chr9	5311815	-2.03227	only TFH
1.14685e-72	-13.099	0.204	0.384	3.70261e-68	Ptpn13	Ptpn13	chr5	103438743	103439177	0.004418	0.544481	10	0.77588	0.2314	chr5:103438743-103439177	-1.74544	gene_body	chr5	103439177	-1.74544	chr5	103405031	103406106	2.9616E-2	0.313683	36	0.76147	0.44779	chr5:103405031-103406106	Distal Intergenic	chr5	103406106	-0.765965	Shared
1.14685e-72	-13.099	0.204	0.384	3.70261e-68	Ptpn13	Ptpn13	chr5	103438743	103439177	0.004418	0.544481	10	0.77588	0.2314	chr5:103438743-103439177	-1.74544	gene_body	chr5	103439177	-1.74544	chr5	103438743	103439177	0.00097019	0.615993	10	0.77588	0.15989	chr5:103438743-103439177	gene_body	chr5	103439177	-2.27875	Shared
1.14685e-72	-13.099	0.204	0.384	3.70261e-68	Ptpn13	Ptpn13	chr5	103438743	103439177	0.004418	0.544481	10	0.77588	0.2314	chr5:103438743-103439177	-1.74544	gene_body	chr5	103439177	-1.74544	chr5	103439303	103439507	1.462E-3	0.182183	16	0.1903	0.0081217	chr5:103439303-103439507	gene_body	chr5	103439507	-4.55035	Shared
1.14685e-72	-13.099	0.204	0.384	3.70261e-68	Ptpn13	Ptpn13	chr5	103438743	103439177	0.004418	0.544481	10	0.77588	0.2314	chr5:103438743-103439177	-1.74544	gene_body	chr5	103439177	-1.74544	chr5	103519109	103519480	3.6893000000000001E-5	0.684654	15	0.7131	0.02845	chr5:103519109-103519480	gene_body	chr5	103519480	-4.6476	Shared
1.14685e-72	-13.099	0.204	0.384	3.70261e-68	Ptpn13	Ptpn13	chr5	103439303	103439507	3.2750000000000001E-3	0.172381	16	0.1903	0.017924	chr5:103439303-103439507	-3.40831	gene_body	chr5	103439507	-3.40831	chr5	103405031	103406106	2.9616E-2	0.313683	36	0.76147	0.44779	chr5:103405031-103406106	Distal Intergenic	chr5	103406106	-0.765965	Shared
1.14685e-72	-13.099	0.204	0.384	3.70261e-68	Ptpn13	Ptpn13	chr5	103439303	103439507	3.2750000000000001E-3	0.172381	16	0.1903	0.017924	chr5:103439303-103439507	-3.40831	gene_body	chr5	103439507	-3.40831	chr5	103438743	103439177	0.00097019	0.615993	10	0.77588	0.15989	chr5:103438743-103439177	gene_body	chr5	103439177	-2.27875	Shared
1.14685e-72	-13.099	0.204	0.384	3.70261e-68	Ptpn13	Ptpn13	chr5	103439303	103439507	3.2750000000000001E-3	0.172381	16	0.1903	0.017924	chr5:103439303-103439507	-3.40831	gene_body	chr5	103439507	-3.40831	chr5	103439303	103439507	1.462E-3	0.182183	16	0.1903	0.0081217	chr5:103439303-103439507	gene_body	chr5	103439507	-4.55035	Shared
1.14685e-72	-13.099	0.204	0.384	3.70261e-68	Ptpn13	Ptpn13	chr5	103439303	103439507	3.2750000000000001E-3	0.172381	16	0.1903	0.017924	chr5:103439303-103439507	-3.40831	gene_body	chr5	103439507	-3.40831	chr5	103519109	103519480	3.6893000000000001E-5	0.684654	15	0.7131	0.02845	chr5:103519109-103519480	gene_body	chr5	103519480	-4.6476	Shared
1.14685e-72	-13.099	0.204	0.384	3.70261e-68	Ptpn13	Ptpn13	chr5	103518836	103519759	4.5201000000000002E-15	0.608217	33	0.73663	0.12841	chr5:103518836-103519759	-2.52018	gene_body	chr5	103519759	-2.52018	chr5	103405031	103406106	2.9616E-2	0.313683	36	0.76147	0.44779	chr5:103405031-103406106	Distal Intergenic	chr5	103406106	-0.765965	Shared
1.14685e-72	-13.099	0.204	0.384	3.70261e-68	Ptpn13	Ptpn13	chr5	103518836	103519759	4.5201000000000002E-15	0.608217	33	0.73663	0.12841	chr5:103518836-103519759	-2.52018	gene_body	chr5	103519759	-2.52018	chr5	103438743	103439177	0.00097019	0.615993	10	0.77588	0.15989	chr5:103438743-103439177	gene_body	chr5	103439177	-2.27875	Shared
1.14685e-72	-13.099	0.204	0.384	3.70261e-68	Ptpn13	Ptpn13	chr5	103518836	103519759	4.5201000000000002E-15	0.608217	33	0.73663	0.12841	chr5:103518836-103519759	-2.52018	gene_body	chr5	103519759	-2.52018	chr5	103439303	103439507	1.462E-3	0.182183	16	0.1903	0.0081217	chr5:103439303-103439507	gene_body	chr5	103439507	-4.55035	Shared
1.14685e-72	-13.099	0.204	0.384	3.70261e-68	Ptpn13	Ptpn13	chr5	103518836	103519759	4.5201000000000002E-15	0.608217	33	0.73663	0.12841	chr5:103518836-103519759	-2.52018	gene_body	chr5	103519759	-2.52018	chr5	103519109	103519480	3.6893000000000001E-5	0.684654	15	0.7131	0.02845	chr5:103519109-103519480	gene_body	chr5	103519480	-4.6476	Shared
1.78657e-71	-19.7552	0.511	0.665	5.76793e-67	Hivep2	Hivep2	chr10	13997160	13998084	5.6408999999999995E-4	0.483047	24	0.66608	0.18304	chr10:13997160-13998084	-1.86354	gene_body	chr10	13998084	-1.86354	chr10	13993922	13994574	0.27561999999999998	0.473451	17	0.60052	0.12707	chr10:13993922-13994574	gene_body	chr10	13994574	-2.24059	Shared
1.78657e-71	-19.7552	0.511	0.665	5.76793e-67	Hivep2	Hivep2	chr10	13997160	13998084	5.6408999999999995E-4	0.483047	24	0.66608	0.18304	chr10:13997160-13998084	-1.86354	gene_body	chr10	13998084	-1.86354	chr10	13997161	13998179	4.901E-5	0.495899	24	0.68715	0.19125	chr10:13997161-13998179	gene_body	chr10	13998179	-1.84517	Shared
1.78657e-71	-19.7552	0.511	0.665	5.76793e-67	Hivep2	Hivep2	chr10	13997160	13998084	5.6408999999999995E-4	0.483047	24	0.66608	0.18304	chr10:13997160-13998084	-1.86354	gene_body	chr10	13998084	-1.86354	chr10	14017909	14018144	0.00013304	0.428212	12	0.63282	0.20461	chr10:14017909-14018144	gene_body	chr10	14018144	-1.62892	Shared
1.78657e-71	-19.7552	0.511	0.665	5.76793e-67	Hivep2	Hivep2	chr10	13997160	13998084	5.6408999999999995E-4	0.483047	24	0.66608	0.18304	chr10:13997160-13998084	-1.86354	gene_body	chr10	13998084	-1.86354	chr10	14033542	14035929	2.5014E-15	0.399439	55	0.81989	0.42046	chr10:14033542-14035929	gene_body	chr10	14035929	-0.963462	Shared
1.78657e-71	-19.7552	0.511	0.665	5.76793e-67	Hivep2	Hivep2	chr10	13997160	13998084	5.6408999999999995E-4	0.483047	24	0.66608	0.18304	chr10:13997160-13998084	-1.86354	gene_body	chr10	13998084	-1.86354	chr10	14049690	14050971	1.7966000000000002E-11	0.494986	36	0.75322	0.25823	chr10:14049690-14050971	gene_body	chr10	14050971	-1.54441	Shared
1.78657e-71	-19.7552	0.511	0.665	5.76793e-67	Hivep2	Hivep2	chr10	13997160	13998084	5.6408999999999995E-4	0.483047	24	0.66608	0.18304	chr10:13997160-13998084	-1.86354	gene_body	chr10	13998084	-1.86354	chr10	14055104	14055881	0.013531	0.343564	24	0.56906	0.22549	chr10:14055104-14055881	gene_body	chr10	14055881	-1.33552	Shared
1.78657e-71	-19.7552	0.511	0.665	5.76793e-67	Hivep2	Hivep2	chr10	14017743	14018312	4.4346000000000001E-4	0.404447	24	0.53727	0.13283	chr10:14017743-14018312	-2.01607	gene_body	chr10	14018312	-2.01607	chr10	13993922	13994574	0.27561999999999998	0.473451	17	0.60052	0.12707	chr10:13993922-13994574	gene_body	chr10	13994574	-2.24059	Shared
1.78657e-71	-19.7552	0.511	0.665	5.76793e-67	Hivep2	Hivep2	chr10	14017743	14018312	4.4346000000000001E-4	0.404447	24	0.53727	0.13283	chr10:14017743-14018312	-2.01607	gene_body	chr10	14018312	-2.01607	chr10	13997161	13998179	4.901E-5	0.495899	24	0.68715	0.19125	chr10:13997161-13998179	gene_body	chr10	13998179	-1.84517	Shared
1.78657e-71	-19.7552	0.511	0.665	5.76793e-67	Hivep2	Hivep2	chr10	14017743	14018312	4.4346000000000001E-4	0.404447	24	0.53727	0.13283	chr10:14017743-14018312	-2.01607	gene_body	chr10	14018312	-2.01607	chr10	14017909	14018144	0.00013304	0.428212	12	0.63282	0.20461	chr10:14017909-14018144	gene_body	chr10	14018144	-1.62892	Shared
1.78657e-71	-19.7552	0.511	0.665	5.76793e-67	Hivep2	Hivep2	chr10	14017743	14018312	4.4346000000000001E-4	0.404447	24	0.53727	0.13283	chr10:14017743-14018312	-2.01607	gene_body	chr10	14018312	-2.01607	chr10	14033542	14035929	2.5014E-15	0.399439	55	0.81989	0.42046	chr10:14033542-14035929	gene_body	chr10	14035929	-0.963462	Shared
1.78657e-71	-19.7552	0.511	0.665	5.76793e-67	Hivep2	Hivep2	chr10	14017743	14018312	4.4346000000000001E-4	0.404447	24	0.53727	0.13283	chr10:14017743-14018312	-2.01607	gene_body	chr10	14018312	-2.01607	chr10	14049690	14050971	1.7966000000000002E-11	0.494986	36	0.75322	0.25823	chr10:14049690-14050971	gene_body	chr10	14050971	-1.54441	Shared
1.78657e-71	-19.7552	0.511	0.665	5.76793e-67	Hivep2	Hivep2	chr10	14017743	14018312	4.4346000000000001E-4	0.404447	24	0.53727	0.13283	chr10:14017743-14018312	-2.01607	gene_body	chr10	14018312	-2.01607	chr10	14055104	14055881	0.013531	0.343564	24	0.56906	0.22549	chr10:14055104-14055881	gene_body	chr10	14055881	-1.33552	Shared
1.78657e-71	-19.7552	0.511	0.665	5.76793e-67	Hivep2	Hivep2	chr10	14034156	14034408	0.00056619	0.607946	10	0.68812	0.080173	chr10:14034156-14034408	-3.10147	gene_body	chr10	14034408	-3.10147	chr10	13993922	13994574	0.27561999999999998	0.473451	17	0.60052	0.12707	chr10:13993922-13994574	gene_body	chr10	13994574	-2.24059	Shared
1.78657e-71	-19.7552	0.511	0.665	5.76793e-67	Hivep2	Hivep2	chr10	14034156	14034408	0.00056619	0.607946	10	0.68812	0.080173	chr10:14034156-14034408	-3.10147	gene_body	chr10	14034408	-3.10147	chr10	13997161	13998179	4.901E-5	0.495899	24	0.68715	0.19125	chr10:13997161-13998179	gene_body	chr10	13998179	-1.84517	Shared
1.78657e-71	-19.7552	0.511	0.665	5.76793e-67	Hivep2	Hivep2	chr10	14034156	14034408	0.00056619	0.607946	10	0.68812	0.080173	chr10:14034156-14034408	-3.10147	gene_body	chr10	14034408	-3.10147	chr10	14017909	14018144	0.00013304	0.428212	12	0.63282	0.20461	chr10:14017909-14018144	gene_body	chr10	14018144	-1.62892	Shared
1.78657e-71	-19.7552	0.511	0.665	5.76793e-67	Hivep2	Hivep2	chr10	14034156	14034408	0.00056619	0.607946	10	0.68812	0.080173	chr10:14034156-14034408	-3.10147	gene_body	chr10	14034408	-3.10147	chr10	14033542	14035929	2.5014E-15	0.399439	55	0.81989	0.42046	chr10:14033542-14035929	gene_body	chr10	14035929	-0.963462	Shared
1.78657e-71	-19.7552	0.511	0.665	5.76793e-67	Hivep2	Hivep2	chr10	14034156	14034408	0.00056619	0.607946	10	0.68812	0.080173	chr10:14034156-14034408	-3.10147	gene_body	chr10	14034408	-3.10147	chr10	14049690	14050971	1.7966000000000002E-11	0.494986	36	0.75322	0.25823	chr10:14049690-14050971	gene_body	chr10	14050971	-1.54441	Shared
1.78657e-71	-19.7552	0.511	0.665	5.76793e-67	Hivep2	Hivep2	chr10	14034156	14034408	0.00056619	0.607946	10	0.68812	0.080173	chr10:14034156-14034408	-3.10147	gene_body	chr10	14034408	-3.10147	chr10	14055104	14055881	0.013531	0.343564	24	0.56906	0.22549	chr10:14055104-14055881	gene_body	chr10	14055881	-1.33552	Shared
1.78657e-71	-19.7552	0.511	0.665	5.76793e-67	Hivep2	Hivep2	chr10	14049690	14050971	1.0177E-16	0.596276	36	0.75322	0.15694	chr10:14049690-14050971	-2.26286	gene_body	chr10	14050971	-2.26286	chr10	13993922	13994574	0.27561999999999998	0.473451	17	0.60052	0.12707	chr10:13993922-13994574	gene_body	chr10	13994574	-2.24059	Shared
1.78657e-71	-19.7552	0.511	0.665	5.76793e-67	Hivep2	Hivep2	chr10	14049690	14050971	1.0177E-16	0.596276	36	0.75322	0.15694	chr10:14049690-14050971	-2.26286	gene_body	chr10	14050971	-2.26286	chr10	13997161	13998179	4.901E-5	0.495899	24	0.68715	0.19125	chr10:13997161-13998179	gene_body	chr10	13998179	-1.84517	Shared
1.78657e-71	-19.7552	0.511	0.665	5.76793e-67	Hivep2	Hivep2	chr10	14049690	14050971	1.0177E-16	0.596276	36	0.75322	0.15694	chr10:14049690-14050971	-2.26286	gene_body	chr10	14050971	-2.26286	chr10	14017909	14018144	0.00013304	0.428212	12	0.63282	0.20461	chr10:14017909-14018144	gene_body	chr10	14018144	-1.62892	Shared
1.78657e-71	-19.7552	0.511	0.665	5.76793e-67	Hivep2	Hivep2	chr10	14049690	14050971	1.0177E-16	0.596276	36	0.75322	0.15694	chr10:14049690-14050971	-2.26286	gene_body	chr10	14050971	-2.26286	chr10	14033542	14035929	2.5014E-15	0.399439	55	0.81989	0.42046	chr10:14033542-14035929	gene_body	chr10	14035929	-0.963462	Shared
1.78657e-71	-19.7552	0.511	0.665	5.76793e-67	Hivep2	Hivep2	chr10	14049690	14050971	1.0177E-16	0.596276	36	0.75322	0.15694	chr10:14049690-14050971	-2.26286	gene_body	chr10	14050971	-2.26286	chr10	14049690	14050971	1.7966000000000002E-11	0.494986	36	0.75322	0.25823	chr10:14049690-14050971	gene_body	chr10	14050971	-1.54441	Shared
1.78657e-71	-19.7552	0.511	0.665	5.76793e-67	Hivep2	Hivep2	chr10	14049690	14050971	1.0177E-16	0.596276	36	0.75322	0.15694	chr10:14049690-14050971	-2.26286	gene_body	chr10	14050971	-2.26286	chr10	14055104	14055881	0.013531	0.343564	24	0.56906	0.22549	chr10:14055104-14055881	gene_body	chr10	14055881	-1.33552	Shared
1.78657e-71	-19.7552	0.511	0.665	5.76793e-67	Hivep2	Hivep2	chr10	14055104	14055881	3.6310000000000003E-5	0.425027	24	0.56906	0.14403	chr10:14055104-14055881	-1.98221	gene_body	chr10	14055881	-1.98221	chr10	13993922	13994574	0.27561999999999998	0.473451	17	0.60052	0.12707	chr10:13993922-13994574	gene_body	chr10	13994574	-2.24059	Shared
1.78657e-71	-19.7552	0.511	0.665	5.76793e-67	Hivep2	Hivep2	chr10	14055104	14055881	3.6310000000000003E-5	0.425027	24	0.56906	0.14403	chr10:14055104-14055881	-1.98221	gene_body	chr10	14055881	-1.98221	chr10	13997161	13998179	4.901E-5	0.495899	24	0.68715	0.19125	chr10:13997161-13998179	gene_body	chr10	13998179	-1.84517	Shared
1.78657e-71	-19.7552	0.511	0.665	5.76793e-67	Hivep2	Hivep2	chr10	14055104	14055881	3.6310000000000003E-5	0.425027	24	0.56906	0.14403	chr10:14055104-14055881	-1.98221	gene_body	chr10	14055881	-1.98221	chr10	14017909	14018144	0.00013304	0.428212	12	0.63282	0.20461	chr10:14017909-14018144	gene_body	chr10	14018144	-1.62892	Shared
1.78657e-71	-19.7552	0.511	0.665	5.76793e-67	Hivep2	Hivep2	chr10	14055104	14055881	3.6310000000000003E-5	0.425027	24	0.56906	0.14403	chr10:14055104-14055881	-1.98221	gene_body	chr10	14055881	-1.98221	chr10	14033542	14035929	2.5014E-15	0.399439	55	0.81989	0.42046	chr10:14033542-14035929	gene_body	chr10	14035929	-0.963462	Shared
1.78657e-71	-19.7552	0.511	0.665	5.76793e-67	Hivep2	Hivep2	chr10	14055104	14055881	3.6310000000000003E-5	0.425027	24	0.56906	0.14403	chr10:14055104-14055881	-1.98221	gene_body	chr10	14055881	-1.98221	chr10	14049690	14050971	1.7966000000000002E-11	0.494986	36	0.75322	0.25823	chr10:14049690-14050971	gene_body	chr10	14050971	-1.54441	Shared
1.78657e-71	-19.7552	0.511	0.665	5.76793e-67	Hivep2	Hivep2	chr10	14055104	14055881	3.6310000000000003E-5	0.425027	24	0.56906	0.14403	chr10:14055104-14055881	-1.98221	gene_body	chr10	14055881	-1.98221	chr10	14055104	14055881	0.013531	0.343564	24	0.56906	0.22549	chr10:14055104-14055881	gene_body	chr10	14055881	-1.33552	Shared
2.48354e-68	-9.06827	0.326	0.513	8.01811e-64	Phactr2	Phactr2	chr10	13385015	13385423	0.00054632	0.669382	10	0.71056	0.041181	chr10:13385015-13385423	-4.10891	gene_body	chr10	13385423	-4.10891	chr10	13468701	13469252	0.02798	0.439633	12	0.5546	0.11496	chr10:13468701-13469252	gene_body	chr10	13469252	-2.27032	Shared
2.48354e-68	-9.06827	0.326	0.513	8.01811e-64	Phactr2	Phactr2	chr10	13424141	13424723	7.4130000000000003E-3	0.562187	37	0.64206	0.13637	chr10:13424141-13424723	-2.23518	gene_body	chr10	13424723	-2.23518	chr10	13468701	13469252	0.02798	0.439633	12	0.5546	0.11496	chr10:13468701-13469252	gene_body	chr10	13469252	-2.27032	Shared
2.48354e-68	-9.06827	0.326	0.513	8.01811e-64	Phactr2	Phactr2	chr10	13424773	13425036	4.9991999999999999E-7	0.762713	16	0.84718	0.084466	chr10:13424773-13425036	-3.32623	gene_body	chr10	13425036	-3.32623	chr10	13468701	13469252	0.02798	0.439633	12	0.5546	0.11496	chr10:13468701-13469252	gene_body	chr10	13469252	-2.27032	Shared
2.48354e-68	-9.06827	0.326	0.513	8.01811e-64	Phactr2	Phactr2	chr10	13468701	13469612	0.0065306	0.492568	20	0.66862	0.17605	chr10:13468701-13469612	-1.9252	gene_body	chr10	13469612	-1.9252	chr10	13468701	13469252	0.02798	0.439633	12	0.5546	0.11496	chr10:13468701-13469252	gene_body	chr10	13469252	-2.27032	Shared
4.96507e-66	-0.81899	0.435	0.616	1.60297e-61	Stat4	Stat4															chr1	52012727	52013065	0.00034487	0.355527	16	0.47583	0.1203	chr1:52012727-52013065	gene_body	chr1	52013065	-1.98381	only TFH
1.06512e-64	9.82661	0.58	0.387	3.43874e-60	Atxn1	Atxn1	chr13	45836806	45838222	5.5580000000000006E-20	0.655400	40	0.77535	0.11995	chr13:45836806-45838222	-2.69241	gene_body	chr13	45838222	-2.69241	chr13	45917430	45917640	0.00014702	0.335508	19	0.90552	0.57001	chr13:45917430-45917640	gene_body	chr13	45917640	-0.667759	Shared
1.06512e-64	9.82661	0.58	0.387	3.43874e-60	Atxn1	Atxn1	chr13	45836806	45838222	5.5580000000000006E-20	0.655400	40	0.77535	0.11995	chr13:45836806-45838222	-2.69241	gene_body	chr13	45838222	-2.69241	chr13	45918778	45919632	1.798E-6	0.426215	38	0.66993	0.24372	chr13:45918778-45919632	gene_body	chr13	45919632	-1.45879	Shared
1.06512e-64	9.82661	0.58	0.387	3.43874e-60	Atxn1	Atxn1	chr13	45861949	45862370	2.6137999999999999E-11	0.744902	22	0.83068	0.085775	chr13:45861949-45862370	-3.27566	gene_body	chr13	45862370	-3.27566	chr13	45917430	45917640	0.00014702	0.335508	19	0.90552	0.57001	chr13:45917430-45917640	gene_body	chr13	45917640	-0.667759	Shared
1.06512e-64	9.82661	0.58	0.387	3.43874e-60	Atxn1	Atxn1	chr13	45861949	45862370	2.6137999999999999E-11	0.744902	22	0.83068	0.085775	chr13:45861949-45862370	-3.27566	gene_body	chr13	45862370	-3.27566	chr13	45918778	45919632	1.798E-6	0.426215	38	0.66993	0.24372	chr13:45918778-45919632	gene_body	chr13	45919632	-1.45879	Shared
1.06512e-64	9.82661	0.58	0.387	3.43874e-60	Atxn1	Atxn1	chr13	45918778	45919631	1.7285E-12	0.587049	36	0.70715	0.1201	chr13:45918778-45919631	-2.55778	gene_body	chr13	45919631	-2.55778	chr13	45917430	45917640	0.00014702	0.335508	19	0.90552	0.57001	chr13:45917430-45917640	gene_body	chr13	45917640	-0.667759	Shared
1.06512e-64	9.82661	0.58	0.387	3.43874e-60	Atxn1	Atxn1	chr13	45918778	45919631	1.7285E-12	0.587049	36	0.70715	0.1201	chr13:45918778-45919631	-2.55778	gene_body	chr13	45919631	-2.55778	chr13	45918778	45919632	1.798E-6	0.426215	38	0.66993	0.24372	chr13:45918778-45919632	gene_body	chr13	45919632	-1.45879	Shared
1.06512e-64	9.82661	0.58	0.387	3.43874e-60	Atxn1	Atxn1	chr13	45932411	45932921	1.0865E-7	0.652480	24	0.73659	0.084105	chr13:45932411-45932921	-3.1306	gene_body	chr13	45932921	-3.1306	chr13	45917430	45917640	0.00014702	0.335508	19	0.90552	0.57001	chr13:45917430-45917640	gene_body	chr13	45917640	-0.667759	Shared
1.06512e-64	9.82661	0.58	0.387	3.43874e-60	Atxn1	Atxn1	chr13	45932411	45932921	1.0865E-7	0.652480	24	0.73659	0.084105	chr13:45932411-45932921	-3.1306	gene_body	chr13	45932921	-3.1306	chr13	45918778	45919632	1.798E-6	0.426215	38	0.66993	0.24372	chr13:45918778-45919632	gene_body	chr13	45919632	-1.45879	Shared
1.48112e-63	-6.71583	0.257	0.43	4.7818e-59	Gtdc1	Gtdc1															chr2	44920701	44921570	0.0027556	0.472073	15	0.79737	0.3253	chr2:44920701-44921570	gene_body	chr2	44921570	-1.29348	only TFH
3.79124e-62	-3.78795	0.168	0.335	1.224e-57	Ppp1r16b	Ppp1r16b	chr2	158700579	158701279	4.1233999999999998E-23	0.683456	37	0.78647	0.10301	chr2:158700579-158701279	-2.93261	gene_body	chr2	158701279	-2.93261	chr2	158700579	158701185	3.5107E-16	0.621142	32	0.77851	0.15737	chr2:158700579-158701185	gene_body	chr2	158701185	-2.30656	Shared
3.79124e-62	-3.78795	0.168	0.335	1.224e-57	Ppp1r16b	Ppp1r16b	chr2	158700579	158701279	4.1233999999999998E-23	0.683456	37	0.78647	0.10301	chr2:158700579-158701279	-2.93261	gene_body	chr2	158701279	-2.93261	chr2	158701606	158701812	0.0017532	0.615271	10	0.75323	0.13796	chr2:158701606-158701812	gene_body	chr2	158701812	-2.44884	Shared
5.36687e-62	-5.34144	0.084	0.234	1.7327e-57	Stx11	Stx11	chr10	12974513	12974916	8.8397999999999992E-9	0.723963	20	0.76469	0.040726	chr10:12974513-12974916	-4.23085	Distal Intergenic	chr10	12974916	-4.23085	chr10	12961710	12961956	2.8733999999999999E-2	0.520761	14	0.54109	0.02033	chr10:12961710-12961956	gene_body	chr10	12961956	-4.73419	Shared
5.36687e-62	-5.34144	0.084	0.234	1.7327e-57	Stx11	Stx11	chr10	12974513	12974916	8.8397999999999992E-9	0.723963	20	0.76469	0.040726	chr10:12974513-12974916	-4.23085	Distal Intergenic	chr10	12974916	-4.23085	chr10	12974513	12974916	8.4616E-7	0.751063	20	0.76469	0.013626	chr10:12974513-12974916	Distal Intergenic	chr10	12974916	-5.81044	Shared
5.36687e-62	-5.34144	0.084	0.234	1.7327e-57	Stx11	Stx11	chr10	12974513	12974916	8.8397999999999992E-9	0.723963	20	0.76469	0.040726	chr10:12974513-12974916	-4.23085	Distal Intergenic	chr10	12974916	-4.23085	chr10	12977788	12978172	1.1324E-7	0.619924	18	0.63501	0.015083	chr10:12977788-12978172	Distal Intergenic	chr10	12978172	-5.39578	Shared
5.36687e-62	-5.34144	0.084	0.234	1.7327e-57	Stx11	Stx11	chr10	12974513	12974916	8.8397999999999992E-9	0.723963	20	0.76469	0.040726	chr10:12974513-12974916	-4.23085	Distal Intergenic	chr10	12974916	-4.23085	chr10	12980938	12981866	2.3658999999999999E-9	0.637193	26	0.7563	0.11911	chr10:12980938-12981866	Distal Intergenic	chr10	12981866	-2.66666	Shared
5.36687e-62	-5.34144	0.084	0.234	1.7327e-57	Stx11	Stx11	chr10	12977788	12978172	9.4543000000000003E-6	0.606826	18	0.63501	0.028182	chr10:12977788-12978172	-4.49393	Distal Intergenic	chr10	12978172	-4.49393	chr10	12961710	12961956	2.8733999999999999E-2	0.520761	14	0.54109	0.02033	chr10:12961710-12961956	gene_body	chr10	12961956	-4.73419	Shared
5.36687e-62	-5.34144	0.084	0.234	1.7327e-57	Stx11	Stx11	chr10	12977788	12978172	9.4543000000000003E-6	0.606826	18	0.63501	0.028182	chr10:12977788-12978172	-4.49393	Distal Intergenic	chr10	12978172	-4.49393	chr10	12974513	12974916	8.4616E-7	0.751063	20	0.76469	0.013626	chr10:12974513-12974916	Distal Intergenic	chr10	12974916	-5.81044	Shared
5.36687e-62	-5.34144	0.084	0.234	1.7327e-57	Stx11	Stx11	chr10	12977788	12978172	9.4543000000000003E-6	0.606826	18	0.63501	0.028182	chr10:12977788-12978172	-4.49393	Distal Intergenic	chr10	12978172	-4.49393	chr10	12977788	12978172	1.1324E-7	0.619924	18	0.63501	0.015083	chr10:12977788-12978172	Distal Intergenic	chr10	12978172	-5.39578	Shared
5.36687e-62	-5.34144	0.084	0.234	1.7327e-57	Stx11	Stx11	chr10	12977788	12978172	9.4543000000000003E-6	0.606826	18	0.63501	0.028182	chr10:12977788-12978172	-4.49393	Distal Intergenic	chr10	12978172	-4.49393	chr10	12980938	12981866	2.3658999999999999E-9	0.637193	26	0.7563	0.11911	chr10:12980938-12981866	Distal Intergenic	chr10	12981866	-2.66666	Shared
5.36687e-62	-5.34144	0.084	0.234	1.7327e-57	Stx11	Stx11	chr10	12980938	12981866	1.1784E-6	0.557819	26	0.7563	0.19848	chr10:12980938-12981866	-1.92996	Distal Intergenic	chr10	12981866	-1.92996	chr10	12961710	12961956	2.8733999999999999E-2	0.520761	14	0.54109	0.02033	chr10:12961710-12961956	gene_body	chr10	12961956	-4.73419	Shared
5.36687e-62	-5.34144	0.084	0.234	1.7327e-57	Stx11	Stx11	chr10	12980938	12981866	1.1784E-6	0.557819	26	0.7563	0.19848	chr10:12980938-12981866	-1.92996	Distal Intergenic	chr10	12981866	-1.92996	chr10	12974513	12974916	8.4616E-7	0.751063	20	0.76469	0.013626	chr10:12974513-12974916	Distal Intergenic	chr10	12974916	-5.81044	Shared
5.36687e-62	-5.34144	0.084	0.234	1.7327e-57	Stx11	Stx11	chr10	12980938	12981866	1.1784E-6	0.557819	26	0.7563	0.19848	chr10:12980938-12981866	-1.92996	Distal Intergenic	chr10	12981866	-1.92996	chr10	12977788	12978172	1.1324E-7	0.619924	18	0.63501	0.015083	chr10:12977788-12978172	Distal Intergenic	chr10	12978172	-5.39578	Shared
5.36687e-62	-5.34144	0.084	0.234	1.7327e-57	Stx11	Stx11	chr10	12980938	12981866	1.1784E-6	0.557819	26	0.7563	0.19848	chr10:12980938-12981866	-1.92996	Distal Intergenic	chr10	12981866	-1.92996	chr10	12980938	12981866	2.3658999999999999E-9	0.637193	26	0.7563	0.11911	chr10:12980938-12981866	Distal Intergenic	chr10	12981866	-2.66666	Shared
3.68441e-60	-5.76336	0.356	0.525	1.18951e-55	Sntb1	Sntb1	chr15	55897135	55897600	4.3886E-8	0.762820	16	0.83737	0.074552	chr15:55897135-55897600	-3.48955	gene_body	chr15	55897600	-3.48955	chr15	55897135	55897600	2.5351000000000001E-6	0.736912	16	0.83737	0.10046	chr15:55897135-55897600	gene_body	chr15	55897600	-3.05924	Shared
3.48409e-59	-1.49299	0.115	0.275	1.12484e-54	Lnx2	Lnx2	chr5	147055721	147056231	0.0013541	0.582187	10	0.63814	0.055955	chr5:147055721-147056231	-3.51153	gene_body	chr5	147056231	-3.51153	chr5	147049877	147050288	9.2560000000000003E-9	0.403043	25	0.81313	0.41009	chr5:147049877-147050288	gene_body	chr5	147050288	-0.987545	Shared
3.48409e-59	-1.49299	0.115	0.275	1.12484e-54	Lnx2	Lnx2	chr5	147055721	147056231	0.0013541	0.582187	10	0.63814	0.055955	chr5:147055721-147056231	-3.51153	gene_body	chr5	147056231	-3.51153	chr5	147055721	147056422	5.0198999999999998E-5	0.645184	16	0.69085	0.045666	chr5:147055721-147056422	gene_body	chr5	147056422	-3.91918	Shared
3.48409e-59	-1.49299	0.115	0.275	1.12484e-54	Lnx2	Lnx2	chr5	147055721	147056231	0.0013541	0.582187	10	0.63814	0.055955	chr5:147055721-147056231	-3.51153	gene_body	chr5	147056231	-3.51153	chr5	147057565	147059653	3.0730999999999998E-4	0.633128	53	0.81422	0.35101	chr5:147057565-147059653	gene_body	chr5	147059653	-1.21391	Shared
3.48409e-59	-1.49299	0.115	0.275	1.12484e-54	Lnx2	Lnx2	chr5	147055721	147056231	0.0013541	0.582187	10	0.63814	0.055955	chr5:147055721-147056231	-3.51153	gene_body	chr5	147056231	-3.51153	chr5	147063729	147064447	3.6226000000000003E-8	0.512193	26	0.71026	0.19807	chr5:147063729-147064447	gene_body	chr5	147064447	-1.84234	Shared
3.48409e-59	-1.49299	0.115	0.275	1.12484e-54	Lnx2	Lnx2	chr5	147055721	147056231	0.0013541	0.582187	10	0.63814	0.055955	chr5:147055721-147056231	-3.51153	gene_body	chr5	147056231	-3.51153	chr5	147070691	147071115	0.016386	0.339629	18	0.68636	0.34673	chr5:147070691-147071115	gene_body	chr5	147071115	-0.985153	Shared
3.48409e-59	-1.49299	0.115	0.275	1.12484e-54	Lnx2	Lnx2	chr5	147055721	147056231	0.0013541	0.582187	10	0.63814	0.055955	chr5:147055721-147056231	-3.51153	gene_body	chr5	147056231	-3.51153	chr5	147071118	147071376	0.21698000000000001	0.538506	10	0.78125	0.24274	chr5:147071118-147071376	gene_body	chr5	147071376	-1.68637	Shared
3.48409e-59	-1.49299	0.115	0.275	1.12484e-54	Lnx2	Lnx2	chr5	147070691	147071376	1.3623E-11	0.631900	28	0.72025	0.088351	chr5:147070691-147071376	-3.02718	gene_body	chr5	147071376	-3.02718	chr5	147049877	147050288	9.2560000000000003E-9	0.403043	25	0.81313	0.41009	chr5:147049877-147050288	gene_body	chr5	147050288	-0.987545	Shared
3.48409e-59	-1.49299	0.115	0.275	1.12484e-54	Lnx2	Lnx2	chr5	147070691	147071376	1.3623E-11	0.631900	28	0.72025	0.088351	chr5:147070691-147071376	-3.02718	gene_body	chr5	147071376	-3.02718	chr5	147055721	147056422	5.0198999999999998E-5	0.645184	16	0.69085	0.045666	chr5:147055721-147056422	gene_body	chr5	147056422	-3.91918	Shared
3.48409e-59	-1.49299	0.115	0.275	1.12484e-54	Lnx2	Lnx2	chr5	147070691	147071376	1.3623E-11	0.631900	28	0.72025	0.088351	chr5:147070691-147071376	-3.02718	gene_body	chr5	147071376	-3.02718	chr5	147057565	147059653	3.0730999999999998E-4	0.633128	53	0.81422	0.35101	chr5:147057565-147059653	gene_body	chr5	147059653	-1.21391	Shared
3.48409e-59	-1.49299	0.115	0.275	1.12484e-54	Lnx2	Lnx2	chr5	147070691	147071376	1.3623E-11	0.631900	28	0.72025	0.088351	chr5:147070691-147071376	-3.02718	gene_body	chr5	147071376	-3.02718	chr5	147063729	147064447	3.6226000000000003E-8	0.512193	26	0.71026	0.19807	chr5:147063729-147064447	gene_body	chr5	147064447	-1.84234	Shared
3.48409e-59	-1.49299	0.115	0.275	1.12484e-54	Lnx2	Lnx2	chr5	147070691	147071376	1.3623E-11	0.631900	28	0.72025	0.088351	chr5:147070691-147071376	-3.02718	gene_body	chr5	147071376	-3.02718	chr5	147070691	147071115	0.016386	0.339629	18	0.68636	0.34673	chr5:147070691-147071115	gene_body	chr5	147071115	-0.985153	Shared
3.48409e-59	-1.49299	0.115	0.275	1.12484e-54	Lnx2	Lnx2	chr5	147070691	147071376	1.3623E-11	0.631900	28	0.72025	0.088351	chr5:147070691-147071376	-3.02718	gene_body	chr5	147071376	-3.02718	chr5	147071118	147071376	0.21698000000000001	0.538506	10	0.78125	0.24274	chr5:147071118-147071376	gene_body	chr5	147071376	-1.68637	Shared
1.34739e-58	-1.22136	0.185	0.348	4.35003e-54	Rapgef1	Rapgef1															chr2	29623021	29625021	0.031578	0.266898	46	0.40874	0.17783	chr2:29623021-29625021	gene_body	chr2	29625021	-1.20068	only TFH
1.34739e-58	-1.22136	0.185	0.348	4.35003e-54	Rapgef1	Rapgef1															chr2	29646756	29647142	0.00017759	0.467334	10	0.82696	0.35963	chr2:29646756-29647142	gene_body	chr2	29647142	-1.2013	only TFH
2.97626e-56	-4.03708	0.455	0.631	9.60885e-52	Sik3	Sik3	chr9	46083487	46083724	0.0056126	0.205201	10	0.21663	0.011433	chr9:46083487-46083724	-4.24396	gene_body	chr9	46083724	-4.24396	chr9	46083487	46083724	0.0056548	0.188924	10	0.21663	0.02771	chr9:46083487-46083724	gene_body	chr9	46083724	-2.96675	Shared
1.31815e-51	-0.547421	0.074	0.192	4.25566e-47	Smco4	Smco4	chr9	15529308	15529876	3.1245999999999997E-4	0.527539	15	0.54351	0.015975	chr9:15529308-15529876	-5.08842	gene_body	chr9	15529876	-5.08842	chr9	15501323	15501598	2.8728999999999999E-8	0.736029	20	0.83959	0.10356	chr9:15501323-15501598	gene_body	chr9	15501598	-3.01922	Shared
1.31815e-51	-0.547421	0.074	0.192	4.25566e-47	Smco4	Smco4	chr9	15529308	15529876	3.1245999999999997E-4	0.527539	15	0.54351	0.015975	chr9:15529308-15529876	-5.08842	gene_body	chr9	15529876	-5.08842	chr9	15513366	15513583	0.0026171	0.296358	10	0.93553	0.63917	chr9:15513366-15513583	gene_body	chr9	15513583	-0.549584	Shared
1.31815e-51	-0.547421	0.074	0.192	4.25566e-47	Smco4	Smco4	chr9	15529308	15529876	3.1245999999999997E-4	0.527539	15	0.54351	0.015975	chr9:15529308-15529876	-5.08842	gene_body	chr9	15529876	-5.08842	chr9	15522364	15523215	0.00022246	0.405906	29	0.73832	0.33241	chr9:15522364-15523215	gene_body	chr9	15523215	-1.15128	Shared
1.31815e-51	-0.547421	0.074	0.192	4.25566e-47	Smco4	Smco4	chr9	15529308	15529876	3.1245999999999997E-4	0.527539	15	0.54351	0.015975	chr9:15529308-15529876	-5.08842	gene_body	chr9	15529876	-5.08842	chr9	15529580	15529876	1.0012E-3	0.516758	14	0.54067	0.023911	chr9:15529580-15529876	gene_body	chr9	15529876	-4.499	Shared
1.31815e-51	-0.547421	0.074	0.192	4.25566e-47	Smco4	Smco4	chr9	15529308	15529876	3.1245999999999997E-4	0.527539	15	0.54351	0.015975	chr9:15529308-15529876	-5.08842	gene_body	chr9	15529876	-5.08842	chr9	15552423	15552884	1.4263000000000001E-12	0.517594	26	0.71695	0.19936	chr9:15552423-15552884	Distal Intergenic	chr9	15552884	-1.8465	Shared
1.31815e-51	-0.547421	0.074	0.192	4.25566e-47	Smco4	Smco4	chr9	15552619	15552854	0.049706	0.330639	10	0.63293	0.30229	chr9:15552619-15552854	-1.06611	Distal Intergenic	chr9	15552854	-1.06611	chr9	15501323	15501598	2.8728999999999999E-8	0.736029	20	0.83959	0.10356	chr9:15501323-15501598	gene_body	chr9	15501598	-3.01922	Shared
1.31815e-51	-0.547421	0.074	0.192	4.25566e-47	Smco4	Smco4	chr9	15552619	15552854	0.049706	0.330639	10	0.63293	0.30229	chr9:15552619-15552854	-1.06611	Distal Intergenic	chr9	15552854	-1.06611	chr9	15513366	15513583	0.0026171	0.296358	10	0.93553	0.63917	chr9:15513366-15513583	gene_body	chr9	15513583	-0.549584	Shared
1.31815e-51	-0.547421	0.074	0.192	4.25566e-47	Smco4	Smco4	chr9	15552619	15552854	0.049706	0.330639	10	0.63293	0.30229	chr9:15552619-15552854	-1.06611	Distal Intergenic	chr9	15552854	-1.06611	chr9	15522364	15523215	0.00022246	0.405906	29	0.73832	0.33241	chr9:15522364-15523215	gene_body	chr9	15523215	-1.15128	Shared
1.31815e-51	-0.547421	0.074	0.192	4.25566e-47	Smco4	Smco4	chr9	15552619	15552854	0.049706	0.330639	10	0.63293	0.30229	chr9:15552619-15552854	-1.06611	Distal Intergenic	chr9	15552854	-1.06611	chr9	15529580	15529876	1.0012E-3	0.516758	14	0.54067	0.023911	chr9:15529580-15529876	gene_body	chr9	15529876	-4.499	Shared
1.31815e-51	-0.547421	0.074	0.192	4.25566e-47	Smco4	Smco4	chr9	15552619	15552854	0.049706	0.330639	10	0.63293	0.30229	chr9:15552619-15552854	-1.06611	Distal Intergenic	chr9	15552854	-1.06611	chr9	15552423	15552884	1.4263000000000001E-12	0.517594	26	0.71695	0.19936	chr9:15552423-15552884	Distal Intergenic	chr9	15552884	-1.8465	Shared
1.83903e-51	1.38885	0.108	0.022	5.9373e-47	Nrn1	Nrn1															chr13	36533817	36534150	9.3797000000000005E-2	0.565298	12	0.83953	0.27424	chr13:36533817-36534150	gene_body	chr13	36534150	-1.61414	only TFH
1.82926e-49	-0.0922989	0.28	0.433	5.90577e-45	Smyd3	Smyd3	chr1	179024969	179025517	2.0528000000000001E-6	0.720854	18	0.80258	0.081729	chr1:179024969-179025517	-3.29573	gene_body	chr1	179025517	-3.29573	chr1	179024970	179025517	5.1453999999999999E-6	0.694921	17	0.79902	0.1041	chr1:179024970-179025517	gene_body	chr1	179025517	-2.94026	Shared
1.63422e-47	-0.631822	0.073	0.185	5.27607e-43	Osbpl3	Osbpl3	chr6	50393803	50394320	2.0281000000000001E-8	0.560531	20	0.70761	0.14708	chr6:50393803-50394320	-2.26635	gene_body	chr6	50394320	-2.26635	chr6	50390448	50390952	0.0065008	0.410143	14	0.6678	0.25765	chr6:50390448-50390952	gene_body	chr6	50390952	-1.374	Shared
1.63422e-47	-0.631822	0.073	0.185	5.27607e-43	Osbpl3	Osbpl3	chr6	50393803	50394320	2.0281000000000001E-8	0.560531	20	0.70761	0.14708	chr6:50393803-50394320	-2.26635	gene_body	chr6	50394320	-2.26635	chr6	50393802	50394223	3.1853000000000002E-9	0.576783	20	0.72718	0.15039	chr6:50393802-50394223	gene_body	chr6	50394223	-2.2736	Shared
1.63422e-47	-0.631822	0.073	0.185	5.27607e-43	Osbpl3	Osbpl3	chr6	50393803	50394320	2.0281000000000001E-8	0.560531	20	0.70761	0.14708	chr6:50393803-50394320	-2.26635	gene_body	chr6	50394320	-2.26635	chr6	50503700	50503914	0.0060052	0.284269	10	0.35744	0.073172	chr6:50503700-50503914	Distal Intergenic	chr6	50503914	-2.28834	Shared
1.23297e-46	-5.99361	0.453	0.6	3.98064e-42	Ikzf2	Ikzf2	chr1	69469249	69469653	4.2987E-4	0.773909	14	0.85215	0.078241	chr1:69469249-69469653	-3.44511	Distal Intergenic	chr1	69469653	-3.44511	chr1	69469249	69469653	7.6185999999999995E-4	0.626470	14	0.85215	0.22568	chr1:69469249-69469653	Distal Intergenic	chr1	69469653	-1.91683	Shared
1.23297e-46	-5.99361	0.453	0.6	3.98064e-42	Ikzf2	Ikzf2	chr1	69469249	69469653	4.2987E-4	0.773909	14	0.85215	0.078241	chr1:69469249-69469653	-3.44511	Distal Intergenic	chr1	69469653	-3.44511	chr1	69499216	69499968	0.0012029	0.418704	15	0.68903	0.27033	chr1:69499216-69499968	Distal Intergenic	chr1	69499968	-1.34985	Shared
1.23297e-46	-5.99361	0.453	0.6	3.98064e-42	Ikzf2	Ikzf2	chr1	69469249	69469653	4.2987E-4	0.773909	14	0.85215	0.078241	chr1:69469249-69469653	-3.44511	Distal Intergenic	chr1	69469653	-3.44511	chr1	69537784	69538317	4.2474E-8	0.720223	18	0.75268	0.032455	chr1:69537784-69538317	gene_body	chr1	69538317	-4.53552	Shared
1.23297e-46	-5.99361	0.453	0.6	3.98064e-42	Ikzf2	Ikzf2	chr1	69469249	69469653	4.2987E-4	0.773909	14	0.85215	0.078241	chr1:69469249-69469653	-3.44511	Distal Intergenic	chr1	69469653	-3.44511	chr1	69544071	69544592	0.77830999999999995	0.555691	12	0.57096	0.01527	chr1:69544071-69544592	gene_body	chr1	69544592	-5.22462	Shared
1.23297e-46	-5.99361	0.453	0.6	3.98064e-42	Ikzf2	Ikzf2	chr1	69469249	69469653	4.2987E-4	0.773909	14	0.85215	0.078241	chr1:69469249-69469653	-3.44511	Distal Intergenic	chr1	69469653	-3.44511	chr1	69548084	69550373	4.0215E-38	0.664441	56	0.76686	0.10242	chr1:69548084-69550373	gene_body	chr1	69550373	-2.90447	Shared
1.23297e-46	-5.99361	0.453	0.6	3.98064e-42	Ikzf2	Ikzf2	chr1	69469249	69469653	4.2987E-4	0.773909	14	0.85215	0.078241	chr1:69469249-69469653	-3.44511	Distal Intergenic	chr1	69469653	-3.44511	chr1	69553739	69554576	1.128E-4	0.499712	16	0.73158	0.23187	chr1:69553739-69554576	gene_body	chr1	69554576	-1.6577	Shared
1.23297e-46	-5.99361	0.453	0.6	3.98064e-42	Ikzf2	Ikzf2	chr1	69469249	69469653	4.2987E-4	0.773909	14	0.85215	0.078241	chr1:69469249-69469653	-3.44511	Distal Intergenic	chr1	69469653	-3.44511	chr1	69678930	69681044	1.5489E-12	0.298837	50	0.75583	0.457	chr1:69678930-69681044	gene_body	chr1	69681044	-0.725868	Shared
1.23297e-46	-5.99361	0.453	0.6	3.98064e-42	Ikzf2	Ikzf2	chr1	69469249	69469653	4.2987E-4	0.773909	14	0.85215	0.078241	chr1:69469249-69469653	-3.44511	Distal Intergenic	chr1	69469653	-3.44511	chr1	69681956	69683282	0.39341999999999999	0.280936	29	0.43888	0.15794	chr1:69681956-69683282	gene_body	chr1	69683282	-1.47445	Shared
1.23297e-46	-5.99361	0.453	0.6	3.98064e-42	Ikzf2	Ikzf2	chr1	69537784	69538317	3.1674000000000003E-8	0.690430	18	0.75268	0.062248	chr1:69537784-69538317	-3.59594	gene_body	chr1	69538317	-3.59594	chr1	69469249	69469653	7.6185999999999995E-4	0.626470	14	0.85215	0.22568	chr1:69469249-69469653	Distal Intergenic	chr1	69469653	-1.91683	Shared
1.23297e-46	-5.99361	0.453	0.6	3.98064e-42	Ikzf2	Ikzf2	chr1	69537784	69538317	3.1674000000000003E-8	0.690430	18	0.75268	0.062248	chr1:69537784-69538317	-3.59594	gene_body	chr1	69538317	-3.59594	chr1	69499216	69499968	0.0012029	0.418704	15	0.68903	0.27033	chr1:69499216-69499968	Distal Intergenic	chr1	69499968	-1.34985	Shared
1.23297e-46	-5.99361	0.453	0.6	3.98064e-42	Ikzf2	Ikzf2	chr1	69537784	69538317	3.1674000000000003E-8	0.690430	18	0.75268	0.062248	chr1:69537784-69538317	-3.59594	gene_body	chr1	69538317	-3.59594	chr1	69537784	69538317	4.2474E-8	0.720223	18	0.75268	0.032455	chr1:69537784-69538317	gene_body	chr1	69538317	-4.53552	Shared
1.23297e-46	-5.99361	0.453	0.6	3.98064e-42	Ikzf2	Ikzf2	chr1	69537784	69538317	3.1674000000000003E-8	0.690430	18	0.75268	0.062248	chr1:69537784-69538317	-3.59594	gene_body	chr1	69538317	-3.59594	chr1	69544071	69544592	0.77830999999999995	0.555691	12	0.57096	0.01527	chr1:69544071-69544592	gene_body	chr1	69544592	-5.22462	Shared
1.23297e-46	-5.99361	0.453	0.6	3.98064e-42	Ikzf2	Ikzf2	chr1	69537784	69538317	3.1674000000000003E-8	0.690430	18	0.75268	0.062248	chr1:69537784-69538317	-3.59594	gene_body	chr1	69538317	-3.59594	chr1	69548084	69550373	4.0215E-38	0.664441	56	0.76686	0.10242	chr1:69548084-69550373	gene_body	chr1	69550373	-2.90447	Shared
1.23297e-46	-5.99361	0.453	0.6	3.98064e-42	Ikzf2	Ikzf2	chr1	69537784	69538317	3.1674000000000003E-8	0.690430	18	0.75268	0.062248	chr1:69537784-69538317	-3.59594	gene_body	chr1	69538317	-3.59594	chr1	69553739	69554576	1.128E-4	0.499712	16	0.73158	0.23187	chr1:69553739-69554576	gene_body	chr1	69554576	-1.6577	Shared
1.23297e-46	-5.99361	0.453	0.6	3.98064e-42	Ikzf2	Ikzf2	chr1	69537784	69538317	3.1674000000000003E-8	0.690430	18	0.75268	0.062248	chr1:69537784-69538317	-3.59594	gene_body	chr1	69538317	-3.59594	chr1	69678930	69681044	1.5489E-12	0.298837	50	0.75583	0.457	chr1:69678930-69681044	gene_body	chr1	69681044	-0.725868	Shared
1.23297e-46	-5.99361	0.453	0.6	3.98064e-42	Ikzf2	Ikzf2	chr1	69537784	69538317	3.1674000000000003E-8	0.690430	18	0.75268	0.062248	chr1:69537784-69538317	-3.59594	gene_body	chr1	69538317	-3.59594	chr1	69681956	69683282	0.39341999999999999	0.280936	29	0.43888	0.15794	chr1:69681956-69683282	gene_body	chr1	69683282	-1.47445	Shared
1.23297e-46	-5.99361	0.453	0.6	3.98064e-42	Ikzf2	Ikzf2	chr1	69544071	69544592	3.3197999999999998E-2	0.555432	12	0.57096	0.015529	chr1:69544071-69544592	-5.20035	gene_body	chr1	69544592	-5.20035	chr1	69469249	69469653	7.6185999999999995E-4	0.626470	14	0.85215	0.22568	chr1:69469249-69469653	Distal Intergenic	chr1	69469653	-1.91683	Shared
1.23297e-46	-5.99361	0.453	0.6	3.98064e-42	Ikzf2	Ikzf2	chr1	69544071	69544592	3.3197999999999998E-2	0.555432	12	0.57096	0.015529	chr1:69544071-69544592	-5.20035	gene_body	chr1	69544592	-5.20035	chr1	69499216	69499968	0.0012029	0.418704	15	0.68903	0.27033	chr1:69499216-69499968	Distal Intergenic	chr1	69499968	-1.34985	Shared
1.23297e-46	-5.99361	0.453	0.6	3.98064e-42	Ikzf2	Ikzf2	chr1	69544071	69544592	3.3197999999999998E-2	0.555432	12	0.57096	0.015529	chr1:69544071-69544592	-5.20035	gene_body	chr1	69544592	-5.20035	chr1	69537784	69538317	4.2474E-8	0.720223	18	0.75268	0.032455	chr1:69537784-69538317	gene_body	chr1	69538317	-4.53552	Shared
1.23297e-46	-5.99361	0.453	0.6	3.98064e-42	Ikzf2	Ikzf2	chr1	69544071	69544592	3.3197999999999998E-2	0.555432	12	0.57096	0.015529	chr1:69544071-69544592	-5.20035	gene_body	chr1	69544592	-5.20035	chr1	69544071	69544592	0.77830999999999995	0.555691	12	0.57096	0.01527	chr1:69544071-69544592	gene_body	chr1	69544592	-5.22462	Shared
1.23297e-46	-5.99361	0.453	0.6	3.98064e-42	Ikzf2	Ikzf2	chr1	69544071	69544592	3.3197999999999998E-2	0.555432	12	0.57096	0.015529	chr1:69544071-69544592	-5.20035	gene_body	chr1	69544592	-5.20035	chr1	69548084	69550373	4.0215E-38	0.664441	56	0.76686	0.10242	chr1:69548084-69550373	gene_body	chr1	69550373	-2.90447	Shared
1.23297e-46	-5.99361	0.453	0.6	3.98064e-42	Ikzf2	Ikzf2	chr1	69544071	69544592	3.3197999999999998E-2	0.555432	12	0.57096	0.015529	chr1:69544071-69544592	-5.20035	gene_body	chr1	69544592	-5.20035	chr1	69553739	69554576	1.128E-4	0.499712	16	0.73158	0.23187	chr1:69553739-69554576	gene_body	chr1	69554576	-1.6577	Shared
1.23297e-46	-5.99361	0.453	0.6	3.98064e-42	Ikzf2	Ikzf2	chr1	69544071	69544592	3.3197999999999998E-2	0.555432	12	0.57096	0.015529	chr1:69544071-69544592	-5.20035	gene_body	chr1	69544592	-5.20035	chr1	69678930	69681044	1.5489E-12	0.298837	50	0.75583	0.457	chr1:69678930-69681044	gene_body	chr1	69681044	-0.725868	Shared
1.23297e-46	-5.99361	0.453	0.6	3.98064e-42	Ikzf2	Ikzf2	chr1	69544071	69544592	3.3197999999999998E-2	0.555432	12	0.57096	0.015529	chr1:69544071-69544592	-5.20035	gene_body	chr1	69544592	-5.20035	chr1	69681956	69683282	0.39341999999999999	0.280936	29	0.43888	0.15794	chr1:69681956-69683282	gene_body	chr1	69683282	-1.47445	Shared
8.66629e-45	-0.583589	0.077	0.186	2.79791e-40	Cers4	Cers4	chr8	4507515	4507820	0.012953	0.406095	12	0.4201	0.014006	chr8:4507515-4507820	-4.90662	gene_body	chr8	4507820	-4.90662	chr8	4507515	4507820	0.012002	0.393589	12	0.4201	0.026512	chr8:4507515-4507820	gene_body	chr8	4507820	-3.98602	Shared
2.56609e-44	-37.9458	0.366	0.511	8.28463e-40	Nfkb1	Nfkb1	chr3	135666159	135666371	0.10237	0.336696	14	0.34532	0.0086279	chr3:135666159-135666371	-5.32278	gene_body	chr3	135666371	-5.32278	chr3	135602867	135603349	3.7425000000000002E-3	-0.437673	15	0.1321	0.56977	chr3:135602867-135603349	gene_body	chr3	135603349	2.10875	Shared
2.56609e-44	-37.9458	0.366	0.511	8.28463e-40	Nfkb1	Nfkb1	chr3	135666159	135666371	0.10237	0.336696	14	0.34532	0.0086279	chr3:135666159-135666371	-5.32278	gene_body	chr3	135666371	-5.32278	chr3	135666159	135666371	0.17993000000000001	0.317877	14	0.34532	0.027447	chr3:135666159-135666371	gene_body	chr3	135666371	-3.65321	Shared
2.56609e-44	-37.9458	0.366	0.511	8.28463e-40	Nfkb1	Nfkb1	chr3	135666159	135666371	0.10237	0.336696	14	0.34532	0.0086279	chr3:135666159-135666371	-5.32278	gene_body	chr3	135666371	-5.32278	chr3	135689720	135689995	0.012219	0.219883	10	0.23398	0.0141	chr3:135689720-135689995	gene_body	chr3	135689995	-4.05262	Shared
2.56609e-44	-37.9458	0.366	0.511	8.28463e-40	Nfkb1	Nfkb1	chr3	135666159	135666371	0.10237	0.336696	14	0.34532	0.0086279	chr3:135666159-135666371	-5.32278	gene_body	chr3	135666371	-5.32278	chr3	135688636	135689082	0.42981000000000003	0.301005	25	0.79095	0.48995	chr3:135688636-135689082	gene_body	chr3	135689082	-0.690952	Shared
4.0055e-44	-1.76956	0.553	0.696	1.29318e-39	Tbc1d4	Tbc1d4	chr14	101453392	101453608	0.012035	0.314063	10	0.33656	0.022497	chr14:101453392-101453608	-3.90306	gene_body	chr14	101453608	-3.90306	chr14	101467933	101469268	4.8028999999999997E-13	0.592025	26	0.79974	0.20771	chr14:101467933-101469268	gene_body	chr14	101469268	-1.94496	Shared
4.0055e-44	-1.76956	0.553	0.696	1.29318e-39	Tbc1d4	Tbc1d4	chr14	101453392	101453608	0.012035	0.314063	10	0.33656	0.022497	chr14:101453392-101453608	-3.90306	gene_body	chr14	101453608	-3.90306	chr14	101476874	101478131	1.5534999999999999E-5	0.267077	58	0.14069	0.010665	chr14:101476874-101478131	gene_body	chr14	101478131	-3.72156	Shared
4.0055e-44	-1.76956	0.553	0.696	1.29318e-39	Tbc1d4	Tbc1d4	chr14	101453392	101453608	0.012035	0.314063	10	0.33656	0.022497	chr14:101453392-101453608	-3.90306	gene_body	chr14	101453608	-3.90306	chr14	101480318	101481194	0.00068247	0.387680	21	0.46003	0.07235	chr14:101480318-101481194	gene_body	chr14	101481194	-2.66866	Shared
4.0055e-44	-1.76956	0.553	0.696	1.29318e-39	Tbc1d4	Tbc1d4	chr14	101480568	101481194	3.7877000000000001E-2	0.468350	19	0.49843	0.030079	chr14:101480568-101481194	-4.05056	gene_body	chr14	101481194	-4.05056	chr14	101467933	101469268	4.8028999999999997E-13	0.592025	26	0.79974	0.20771	chr14:101467933-101469268	gene_body	chr14	101469268	-1.94496	Shared
4.0055e-44	-1.76956	0.553	0.696	1.29318e-39	Tbc1d4	Tbc1d4	chr14	101480568	101481194	3.7877000000000001E-2	0.468350	19	0.49843	0.030079	chr14:101480568-101481194	-4.05056	gene_body	chr14	101481194	-4.05056	chr14	101476874	101478131	1.5534999999999999E-5	0.267077	58	0.14069	0.010665	chr14:101476874-101478131	gene_body	chr14	101478131	-3.72156	Shared
4.0055e-44	-1.76956	0.553	0.696	1.29318e-39	Tbc1d4	Tbc1d4	chr14	101480568	101481194	3.7877000000000001E-2	0.468350	19	0.49843	0.030079	chr14:101480568-101481194	-4.05056	gene_body	chr14	101481194	-4.05056	chr14	101480318	101481194	0.00068247	0.387680	21	0.46003	0.07235	chr14:101480318-101481194	gene_body	chr14	101481194	-2.66866	Shared
9.22613e-41	-0.926822	0.125	0.245	2.97866e-36	Usp6nl	Usp6nl	chr2	6379815	6380734	6.6610999999999995E-20	0.706530	33	0.75993	0.053397	chr2:6379815-6380734	-3.83104	gene_body	chr2	6380734	-3.83104	chr2	6338209	6338482	0.00057914	-0.248481	16	0.046747	0.29523	chr2:6338209-6338482	gene_body	chr2	6338482	2.65889	Shared
9.22613e-41	-0.926822	0.125	0.245	2.97866e-36	Usp6nl	Usp6nl	chr2	6379815	6380734	6.6610999999999995E-20	0.706530	33	0.75993	0.053397	chr2:6379815-6380734	-3.83104	gene_body	chr2	6380734	-3.83104	chr2	6359722	6360009	1.1035999999999999E-3	0.499722	17	0.77101	0.27129	chr2:6359722-6360009	gene_body	chr2	6360009	-1.50691	Shared
9.22613e-41	-0.926822	0.125	0.245	2.97866e-36	Usp6nl	Usp6nl	chr2	6379815	6380734	6.6610999999999995E-20	0.706530	33	0.75993	0.053397	chr2:6379815-6380734	-3.83104	gene_body	chr2	6380734	-3.83104	chr2	6379794	6380695	6.5705E-16	0.610726	33	0.74617	0.13545	chr2:6379794-6380695	gene_body	chr2	6380695	-2.46174	Shared
9.22613e-41	-0.926822	0.125	0.245	2.97866e-36	Usp6nl	Usp6nl	chr2	6379815	6380734	6.6610999999999995E-20	0.706530	33	0.75993	0.053397	chr2:6379815-6380734	-3.83104	gene_body	chr2	6380734	-3.83104	chr2	6598487	6599953	9.6276999999999993E-7	0.554923	26	0.71543	0.16051	chr2:6598487-6599953	gene_body	chr2	6599953	-2.15615	Shared
9.22613e-41	-0.926822	0.125	0.245	2.97866e-36	Usp6nl	Usp6nl	chr2	6379815	6380734	6.6610999999999995E-20	0.706530	33	0.75993	0.053397	chr2:6379815-6380734	-3.83104	gene_body	chr2	6380734	-3.83104	chr2	6695285	6695769	0.0028867	0.468876	10	0.533	0.064129	chr2:6695285-6695769	gene_body	chr2	6695769	-3.05509	Shared
9.22613e-41	-0.926822	0.125	0.245	2.97866e-36	Usp6nl	Usp6nl	chr2	6379815	6380734	6.6610999999999995E-20	0.706530	33	0.75993	0.053397	chr2:6379815-6380734	-3.83104	gene_body	chr2	6380734	-3.83104	chr2	6705937	6706226	0.00032543	0.153755	13	0.15756	0.0038039	chr2:6705937-6706226	gene_body	chr2	6706226	-5.37228	Shared
9.22613e-41	-0.926822	0.125	0.245	2.97866e-36	Usp6nl	Usp6nl	chr2	6557685	6558447	9.1554999999999997E-2	0.591216	13	0.7918	0.20059	chr2:6557685-6558447	-1.98089	gene_body	chr2	6558447	-1.98089	chr2	6338209	6338482	0.00057914	-0.248481	16	0.046747	0.29523	chr2:6338209-6338482	gene_body	chr2	6338482	2.65889	Shared
9.22613e-41	-0.926822	0.125	0.245	2.97866e-36	Usp6nl	Usp6nl	chr2	6557685	6558447	9.1554999999999997E-2	0.591216	13	0.7918	0.20059	chr2:6557685-6558447	-1.98089	gene_body	chr2	6558447	-1.98089	chr2	6359722	6360009	1.1035999999999999E-3	0.499722	17	0.77101	0.27129	chr2:6359722-6360009	gene_body	chr2	6360009	-1.50691	Shared
9.22613e-41	-0.926822	0.125	0.245	2.97866e-36	Usp6nl	Usp6nl	chr2	6557685	6558447	9.1554999999999997E-2	0.591216	13	0.7918	0.20059	chr2:6557685-6558447	-1.98089	gene_body	chr2	6558447	-1.98089	chr2	6379794	6380695	6.5705E-16	0.610726	33	0.74617	0.13545	chr2:6379794-6380695	gene_body	chr2	6380695	-2.46174	Shared
9.22613e-41	-0.926822	0.125	0.245	2.97866e-36	Usp6nl	Usp6nl	chr2	6557685	6558447	9.1554999999999997E-2	0.591216	13	0.7918	0.20059	chr2:6557685-6558447	-1.98089	gene_body	chr2	6558447	-1.98089	chr2	6598487	6599953	9.6276999999999993E-7	0.554923	26	0.71543	0.16051	chr2:6598487-6599953	gene_body	chr2	6599953	-2.15615	Shared
9.22613e-41	-0.926822	0.125	0.245	2.97866e-36	Usp6nl	Usp6nl	chr2	6557685	6558447	9.1554999999999997E-2	0.591216	13	0.7918	0.20059	chr2:6557685-6558447	-1.98089	gene_body	chr2	6558447	-1.98089	chr2	6695285	6695769	0.0028867	0.468876	10	0.533	0.064129	chr2:6695285-6695769	gene_body	chr2	6695769	-3.05509	Shared
9.22613e-41	-0.926822	0.125	0.245	2.97866e-36	Usp6nl	Usp6nl	chr2	6557685	6558447	9.1554999999999997E-2	0.591216	13	0.7918	0.20059	chr2:6557685-6558447	-1.98089	gene_body	chr2	6558447	-1.98089	chr2	6705937	6706226	0.00032543	0.153755	13	0.15756	0.0038039	chr2:6705937-6706226	gene_body	chr2	6706226	-5.37228	Shared
9.22613e-41	-0.926822	0.125	0.245	2.97866e-36	Usp6nl	Usp6nl	chr2	6598487	6600133	5.717E-9	0.585074	27	0.71922	0.13415	chr2:6598487-6600133	-2.42259	gene_body	chr2	6600133	-2.42259	chr2	6338209	6338482	0.00057914	-0.248481	16	0.046747	0.29523	chr2:6338209-6338482	gene_body	chr2	6338482	2.65889	Shared
9.22613e-41	-0.926822	0.125	0.245	2.97866e-36	Usp6nl	Usp6nl	chr2	6598487	6600133	5.717E-9	0.585074	27	0.71922	0.13415	chr2:6598487-6600133	-2.42259	gene_body	chr2	6600133	-2.42259	chr2	6359722	6360009	1.1035999999999999E-3	0.499722	17	0.77101	0.27129	chr2:6359722-6360009	gene_body	chr2	6360009	-1.50691	Shared
9.22613e-41	-0.926822	0.125	0.245	2.97866e-36	Usp6nl	Usp6nl	chr2	6598487	6600133	5.717E-9	0.585074	27	0.71922	0.13415	chr2:6598487-6600133	-2.42259	gene_body	chr2	6600133	-2.42259	chr2	6379794	6380695	6.5705E-16	0.610726	33	0.74617	0.13545	chr2:6379794-6380695	gene_body	chr2	6380695	-2.46174	Shared
9.22613e-41	-0.926822	0.125	0.245	2.97866e-36	Usp6nl	Usp6nl	chr2	6598487	6600133	5.717E-9	0.585074	27	0.71922	0.13415	chr2:6598487-6600133	-2.42259	gene_body	chr2	6600133	-2.42259	chr2	6598487	6599953	9.6276999999999993E-7	0.554923	26	0.71543	0.16051	chr2:6598487-6599953	gene_body	chr2	6599953	-2.15615	Shared
9.22613e-41	-0.926822	0.125	0.245	2.97866e-36	Usp6nl	Usp6nl	chr2	6598487	6600133	5.717E-9	0.585074	27	0.71922	0.13415	chr2:6598487-6600133	-2.42259	gene_body	chr2	6600133	-2.42259	chr2	6695285	6695769	0.0028867	0.468876	10	0.533	0.064129	chr2:6695285-6695769	gene_body	chr2	6695769	-3.05509	Shared
9.22613e-41	-0.926822	0.125	0.245	2.97866e-36	Usp6nl	Usp6nl	chr2	6598487	6600133	5.717E-9	0.585074	27	0.71922	0.13415	chr2:6598487-6600133	-2.42259	gene_body	chr2	6600133	-2.42259	chr2	6705937	6706226	0.00032543	0.153755	13	0.15756	0.0038039	chr2:6705937-6706226	gene_body	chr2	6706226	-5.37228	Shared
9.22613e-41	-0.926822	0.125	0.245	2.97866e-36	Usp6nl	Usp6nl	chr2	6695285	6695769	0.18260999999999999	0.504296	10	0.533	0.028709	chr2:6695285-6695769	-4.21456	gene_body	chr2	6695769	-4.21456	chr2	6338209	6338482	0.00057914	-0.248481	16	0.046747	0.29523	chr2:6338209-6338482	gene_body	chr2	6338482	2.65889	Shared
9.22613e-41	-0.926822	0.125	0.245	2.97866e-36	Usp6nl	Usp6nl	chr2	6695285	6695769	0.18260999999999999	0.504296	10	0.533	0.028709	chr2:6695285-6695769	-4.21456	gene_body	chr2	6695769	-4.21456	chr2	6359722	6360009	1.1035999999999999E-3	0.499722	17	0.77101	0.27129	chr2:6359722-6360009	gene_body	chr2	6360009	-1.50691	Shared
9.22613e-41	-0.926822	0.125	0.245	2.97866e-36	Usp6nl	Usp6nl	chr2	6695285	6695769	0.18260999999999999	0.504296	10	0.533	0.028709	chr2:6695285-6695769	-4.21456	gene_body	chr2	6695769	-4.21456	chr2	6379794	6380695	6.5705E-16	0.610726	33	0.74617	0.13545	chr2:6379794-6380695	gene_body	chr2	6380695	-2.46174	Shared
9.22613e-41	-0.926822	0.125	0.245	2.97866e-36	Usp6nl	Usp6nl	chr2	6695285	6695769	0.18260999999999999	0.504296	10	0.533	0.028709	chr2:6695285-6695769	-4.21456	gene_body	chr2	6695769	-4.21456	chr2	6598487	6599953	9.6276999999999993E-7	0.554923	26	0.71543	0.16051	chr2:6598487-6599953	gene_body	chr2	6599953	-2.15615	Shared
9.22613e-41	-0.926822	0.125	0.245	2.97866e-36	Usp6nl	Usp6nl	chr2	6695285	6695769	0.18260999999999999	0.504296	10	0.533	0.028709	chr2:6695285-6695769	-4.21456	gene_body	chr2	6695769	-4.21456	chr2	6695285	6695769	0.0028867	0.468876	10	0.533	0.064129	chr2:6695285-6695769	gene_body	chr2	6695769	-3.05509	Shared
9.22613e-41	-0.926822	0.125	0.245	2.97866e-36	Usp6nl	Usp6nl	chr2	6695285	6695769	0.18260999999999999	0.504296	10	0.533	0.028709	chr2:6695285-6695769	-4.21456	gene_body	chr2	6695769	-4.21456	chr2	6705937	6706226	0.00032543	0.153755	13	0.15756	0.0038039	chr2:6705937-6706226	gene_body	chr2	6706226	-5.37228	Shared
1.30257e-40	-1.36471	0.438	0.579	4.20535e-36	Msi2	Msi2	chr11	88567135	88567440	8.1297999999999998E-9	0.615241	22	0.70952	0.094274	chr11:88567135-88567440	-2.91191	gene_body	chr11	88567440	-2.91191	chr11	88567135	88567564	1.0151E-4	0.514219	23	0.7113	0.19708	chr11:88567135-88567564	gene_body	chr11	88567564	-1.85168	Shared
7.19103e-40	-2.14695	0.253	0.38	2.32163e-35	Nrip1	Nrip1	chr16	76337028	76337866	2.8401E-12	0.374402	42	0.42372	0.049317	chr16:76337028-76337866	-3.10295	gene_body	chr16	76337866	-3.10295	chr16	76337028	76337922	4.2530000000000002E-10	0.350105	45	0.45383	0.10373	chr16:76337028-76337922	gene_body	chr16	76337922	-2.12932	Shared
7.19103e-40	-2.14695	0.253	0.38	2.32163e-35	Nrip1	Nrip1	chr16	76337028	76337866	2.8401E-12	0.374402	42	0.42372	0.049317	chr16:76337028-76337866	-3.10295	gene_body	chr16	76337866	-3.10295	chr16	76355513	76355780	0.035634	0.391708	10	0.41548	0.023769	chr16:76355513-76355780	gene_body	chr16	76355780	-4.12763	Shared
7.19103e-40	-2.14695	0.253	0.38	2.32163e-35	Nrip1	Nrip1	chr16	76337028	76337866	2.8401E-12	0.374402	42	0.42372	0.049317	chr16:76337028-76337866	-3.10295	gene_body	chr16	76337866	-3.10295	chr16	76357229	76357606	1.1179E-10	0.414515	26	0.64871	0.2342	chr16:76357229-76357606	gene_body	chr16	76357606	-1.46983	Shared
7.19103e-40	-2.14695	0.253	0.38	2.32163e-35	Nrip1	Nrip1	chr16	76337028	76337866	2.8401E-12	0.374402	42	0.42372	0.049317	chr16:76337028-76337866	-3.10295	gene_body	chr16	76337866	-3.10295	chr16	76366735	76367256	5.5037000000000002E-5	0.491427	20	0.56269	0.071266	chr16:76366735-76367256	gene_body	chr16	76367256	-2.98105	Shared
7.19103e-40	-2.14695	0.253	0.38	2.32163e-35	Nrip1	Nrip1	chr16	76355189	76355780	0.0019683	0.377433	14	0.38737	0.0099388	chr16:76355189-76355780	-5.2845	gene_body	chr16	76355780	-5.2845	chr16	76337028	76337922	4.2530000000000002E-10	0.350105	45	0.45383	0.10373	chr16:76337028-76337922	gene_body	chr16	76337922	-2.12932	Shared
7.19103e-40	-2.14695	0.253	0.38	2.32163e-35	Nrip1	Nrip1	chr16	76355189	76355780	0.0019683	0.377433	14	0.38737	0.0099388	chr16:76355189-76355780	-5.2845	gene_body	chr16	76355780	-5.2845	chr16	76355513	76355780	0.035634	0.391708	10	0.41548	0.023769	chr16:76355513-76355780	gene_body	chr16	76355780	-4.12763	Shared
7.19103e-40	-2.14695	0.253	0.38	2.32163e-35	Nrip1	Nrip1	chr16	76355189	76355780	0.0019683	0.377433	14	0.38737	0.0099388	chr16:76355189-76355780	-5.2845	gene_body	chr16	76355780	-5.2845	chr16	76357229	76357606	1.1179E-10	0.414515	26	0.64871	0.2342	chr16:76357229-76357606	gene_body	chr16	76357606	-1.46983	Shared
7.19103e-40	-2.14695	0.253	0.38	2.32163e-35	Nrip1	Nrip1	chr16	76355189	76355780	0.0019683	0.377433	14	0.38737	0.0099388	chr16:76355189-76355780	-5.2845	gene_body	chr16	76355780	-5.2845	chr16	76366735	76367256	5.5037000000000002E-5	0.491427	20	0.56269	0.071266	chr16:76366735-76367256	gene_body	chr16	76367256	-2.98105	Shared
7.19103e-40	-2.14695	0.253	0.38	2.32163e-35	Nrip1	Nrip1	chr16	76357018	76357822	1.775E-9	0.469289	35	0.69794	0.22865	chr16:76357018-76357822	-1.60996	gene_body	chr16	76357822	-1.60996	chr16	76337028	76337922	4.2530000000000002E-10	0.350105	45	0.45383	0.10373	chr16:76337028-76337922	gene_body	chr16	76337922	-2.12932	Shared
7.19103e-40	-2.14695	0.253	0.38	2.32163e-35	Nrip1	Nrip1	chr16	76357018	76357822	1.775E-9	0.469289	35	0.69794	0.22865	chr16:76357018-76357822	-1.60996	gene_body	chr16	76357822	-1.60996	chr16	76355513	76355780	0.035634	0.391708	10	0.41548	0.023769	chr16:76355513-76355780	gene_body	chr16	76355780	-4.12763	Shared
7.19103e-40	-2.14695	0.253	0.38	2.32163e-35	Nrip1	Nrip1	chr16	76357018	76357822	1.775E-9	0.469289	35	0.69794	0.22865	chr16:76357018-76357822	-1.60996	gene_body	chr16	76357822	-1.60996	chr16	76357229	76357606	1.1179E-10	0.414515	26	0.64871	0.2342	chr16:76357229-76357606	gene_body	chr16	76357606	-1.46983	Shared
7.19103e-40	-2.14695	0.253	0.38	2.32163e-35	Nrip1	Nrip1	chr16	76357018	76357822	1.775E-9	0.469289	35	0.69794	0.22865	chr16:76357018-76357822	-1.60996	gene_body	chr16	76357822	-1.60996	chr16	76366735	76367256	5.5037000000000002E-5	0.491427	20	0.56269	0.071266	chr16:76366735-76367256	gene_body	chr16	76367256	-2.98105	Shared
7.19103e-40	-2.14695	0.253	0.38	2.32163e-35	Nrip1	Nrip1	chr16	76366607	76367658	5.7610999999999998E-12	0.440017	41	0.56849	0.12847	chr16:76366607-76367658	-2.1457	gene_body	chr16	76367658	-2.1457	chr16	76337028	76337922	4.2530000000000002E-10	0.350105	45	0.45383	0.10373	chr16:76337028-76337922	gene_body	chr16	76337922	-2.12932	Shared
7.19103e-40	-2.14695	0.253	0.38	2.32163e-35	Nrip1	Nrip1	chr16	76366607	76367658	5.7610999999999998E-12	0.440017	41	0.56849	0.12847	chr16:76366607-76367658	-2.1457	gene_body	chr16	76367658	-2.1457	chr16	76355513	76355780	0.035634	0.391708	10	0.41548	0.023769	chr16:76355513-76355780	gene_body	chr16	76355780	-4.12763	Shared
7.19103e-40	-2.14695	0.253	0.38	2.32163e-35	Nrip1	Nrip1	chr16	76366607	76367658	5.7610999999999998E-12	0.440017	41	0.56849	0.12847	chr16:76366607-76367658	-2.1457	gene_body	chr16	76367658	-2.1457	chr16	76357229	76357606	1.1179E-10	0.414515	26	0.64871	0.2342	chr16:76357229-76357606	gene_body	chr16	76357606	-1.46983	Shared
7.19103e-40	-2.14695	0.253	0.38	2.32163e-35	Nrip1	Nrip1	chr16	76366607	76367658	5.7610999999999998E-12	0.440017	41	0.56849	0.12847	chr16:76366607-76367658	-2.1457	gene_body	chr16	76367658	-2.1457	chr16	76366735	76367256	5.5037000000000002E-5	0.491427	20	0.56269	0.071266	chr16:76366735-76367256	gene_body	chr16	76367256	-2.98105	Shared
8.22335e-35	-5.16487	0.519	0.632	2.65491e-30	Maf	Maf	chr8	115136805	115137081	9.7755000000000001E-13	0.491448	26	0.73779	0.24634	chr8:115136805-115137081	-1.58256	gene_body	chr8	115137081	-1.58256	chr8	115126422	115127233	0.0012257	0.362639	27	0.72261	0.35997	chr8:115126422-115127233	gene_body	chr8	115127233	-1.00534	Shared
8.22335e-35	-5.16487	0.519	0.632	2.65491e-30	Maf	Maf	chr8	115136805	115137081	9.7755000000000001E-13	0.491448	26	0.73779	0.24634	chr8:115136805-115137081	-1.58256	gene_body	chr8	115137081	-1.58256	chr8	115136805	115137141	1.6086999999999999E-16	0.612081	29	0.70243	0.090352	chr8:115136805-115137141	gene_body	chr8	115137141	-2.95873	Shared
8.22335e-35	-5.16487	0.519	0.632	2.65491e-30	Maf	Maf	chr8	115136805	115137081	9.7755000000000001E-13	0.491448	26	0.73779	0.24634	chr8:115136805-115137081	-1.58256	gene_body	chr8	115137081	-1.58256	chr8	115221337	115221779	1.3904000000000001E-7	0.589439	19	0.84356	0.25412	chr8:115221337-115221779	gene_body	chr8	115221779	-1.73098	Shared
8.22335e-35	-5.16487	0.519	0.632	2.65491e-30	Maf	Maf	chr8	115136805	115137081	9.7755000000000001E-13	0.491448	26	0.73779	0.24634	chr8:115136805-115137081	-1.58256	gene_body	chr8	115137081	-1.58256	chr8	115236878	115237407	0.00037861	0.517670	22	0.66972	0.15205	chr8:115236878-115237407	gene_body	chr8	115237407	-2.13901	Shared
8.22335e-35	-5.16487	0.519	0.632	2.65491e-30	Maf	Maf	chr8	115136805	115137081	9.7755000000000001E-13	0.491448	26	0.73779	0.24634	chr8:115136805-115137081	-1.58256	gene_body	chr8	115137081	-1.58256	chr8	115531285	115531551	3.2585999999999997E-4	0.596978	16	0.86303	0.26605	chr8:115531285-115531551	Distal Intergenic	chr8	115531551	-1.69771	Shared
8.22335e-35	-5.16487	0.519	0.632	2.65491e-30	Maf	Maf	chr8	115136805	115137081	9.7755000000000001E-13	0.491448	26	0.73779	0.24634	chr8:115136805-115137081	-1.58256	gene_body	chr8	115137081	-1.58256	chr8	115698097	115701327	6.7214999999999999E-7	0.495149	66	0.76277	0.38572	chr8:115698097-115701327	gene_body	chr8	115701327	-0.983694	Shared
8.22335e-35	-5.16487	0.519	0.632	2.65491e-30	Maf	Maf	chr8	115136805	115137081	9.7755000000000001E-13	0.491448	26	0.73779	0.24634	chr8:115136805-115137081	-1.58256	gene_body	chr8	115137081	-1.58256	chr8	115726910	115727398	6.7926999999999996E-3	0.603866	12	0.67016	0.066298	chr8:115726910-115727398	Distal Intergenic	chr8	115727398	-3.33747	Shared
8.22335e-35	-5.16487	0.519	0.632	2.65491e-30	Maf	Maf	chr8	115136805	115137081	9.7755000000000001E-13	0.491448	26	0.73779	0.24634	chr8:115136805-115137081	-1.58256	gene_body	chr8	115137081	-1.58256	chr8	115742245	115742544	0.0028377	0.615641	10	0.84477	0.22913	chr8:115742245-115742544	Distal Intergenic	chr8	115742544	-1.88239	Shared
8.22335e-35	-5.16487	0.519	0.632	2.65491e-30	Maf	Maf	chr8	115136805	115137081	9.7755000000000001E-13	0.491448	26	0.73779	0.24634	chr8:115136805-115137081	-1.58256	gene_body	chr8	115137081	-1.58256	chr8	115742996	115743269	0.15781999999999999	0.665582	10	0.72977	0.064186	chr8:115742996-115743269	Distal Intergenic	chr8	115743269	-3.50711	Shared
8.22335e-35	-5.16487	0.519	0.632	2.65491e-30	Maf	Maf	chr8	115530811	115531551	4.5157999999999998E-11	0.782856	22	0.82401	0.041149	chr8:115530811-115531551	-4.32373	Distal Intergenic	chr8	115531551	-4.32373	chr8	115126422	115127233	0.0012257	0.362639	27	0.72261	0.35997	chr8:115126422-115127233	gene_body	chr8	115127233	-1.00534	Shared
8.22335e-35	-5.16487	0.519	0.632	2.65491e-30	Maf	Maf	chr8	115530811	115531551	4.5157999999999998E-11	0.782856	22	0.82401	0.041149	chr8:115530811-115531551	-4.32373	Distal Intergenic	chr8	115531551	-4.32373	chr8	115136805	115137141	1.6086999999999999E-16	0.612081	29	0.70243	0.090352	chr8:115136805-115137141	gene_body	chr8	115137141	-2.95873	Shared
8.22335e-35	-5.16487	0.519	0.632	2.65491e-30	Maf	Maf	chr8	115530811	115531551	4.5157999999999998E-11	0.782856	22	0.82401	0.041149	chr8:115530811-115531551	-4.32373	Distal Intergenic	chr8	115531551	-4.32373	chr8	115221337	115221779	1.3904000000000001E-7	0.589439	19	0.84356	0.25412	chr8:115221337-115221779	gene_body	chr8	115221779	-1.73098	Shared
8.22335e-35	-5.16487	0.519	0.632	2.65491e-30	Maf	Maf	chr8	115530811	115531551	4.5157999999999998E-11	0.782856	22	0.82401	0.041149	chr8:115530811-115531551	-4.32373	Distal Intergenic	chr8	115531551	-4.32373	chr8	115236878	115237407	0.00037861	0.517670	22	0.66972	0.15205	chr8:115236878-115237407	gene_body	chr8	115237407	-2.13901	Shared
8.22335e-35	-5.16487	0.519	0.632	2.65491e-30	Maf	Maf	chr8	115530811	115531551	4.5157999999999998E-11	0.782856	22	0.82401	0.041149	chr8:115530811-115531551	-4.32373	Distal Intergenic	chr8	115531551	-4.32373	chr8	115531285	115531551	3.2585999999999997E-4	0.596978	16	0.86303	0.26605	chr8:115531285-115531551	Distal Intergenic	chr8	115531551	-1.69771	Shared
8.22335e-35	-5.16487	0.519	0.632	2.65491e-30	Maf	Maf	chr8	115530811	115531551	4.5157999999999998E-11	0.782856	22	0.82401	0.041149	chr8:115530811-115531551	-4.32373	Distal Intergenic	chr8	115531551	-4.32373	chr8	115698097	115701327	6.7214999999999999E-7	0.495149	66	0.76277	0.38572	chr8:115698097-115701327	gene_body	chr8	115701327	-0.983694	Shared
8.22335e-35	-5.16487	0.519	0.632	2.65491e-30	Maf	Maf	chr8	115530811	115531551	4.5157999999999998E-11	0.782856	22	0.82401	0.041149	chr8:115530811-115531551	-4.32373	Distal Intergenic	chr8	115531551	-4.32373	chr8	115726910	115727398	6.7926999999999996E-3	0.603866	12	0.67016	0.066298	chr8:115726910-115727398	Distal Intergenic	chr8	115727398	-3.33747	Shared
8.22335e-35	-5.16487	0.519	0.632	2.65491e-30	Maf	Maf	chr8	115530811	115531551	4.5157999999999998E-11	0.782856	22	0.82401	0.041149	chr8:115530811-115531551	-4.32373	Distal Intergenic	chr8	115531551	-4.32373	chr8	115742245	115742544	0.0028377	0.615641	10	0.84477	0.22913	chr8:115742245-115742544	Distal Intergenic	chr8	115742544	-1.88239	Shared
8.22335e-35	-5.16487	0.519	0.632	2.65491e-30	Maf	Maf	chr8	115530811	115531551	4.5157999999999998E-11	0.782856	22	0.82401	0.041149	chr8:115530811-115531551	-4.32373	Distal Intergenic	chr8	115531551	-4.32373	chr8	115742996	115743269	0.15781999999999999	0.665582	10	0.72977	0.064186	chr8:115742996-115743269	Distal Intergenic	chr8	115743269	-3.50711	Shared
8.22335e-35	-5.16487	0.519	0.632	2.65491e-30	Maf	Maf	chr8	115726911	115727397	0.85597999999999996	0.550541	10	0.66286	0.11232	chr8:115726911-115727397	-2.56109	Distal Intergenic	chr8	115727397	-2.56109	chr8	115126422	115127233	0.0012257	0.362639	27	0.72261	0.35997	chr8:115126422-115127233	gene_body	chr8	115127233	-1.00534	Shared
8.22335e-35	-5.16487	0.519	0.632	2.65491e-30	Maf	Maf	chr8	115726911	115727397	0.85597999999999996	0.550541	10	0.66286	0.11232	chr8:115726911-115727397	-2.56109	Distal Intergenic	chr8	115727397	-2.56109	chr8	115136805	115137141	1.6086999999999999E-16	0.612081	29	0.70243	0.090352	chr8:115136805-115137141	gene_body	chr8	115137141	-2.95873	Shared
8.22335e-35	-5.16487	0.519	0.632	2.65491e-30	Maf	Maf	chr8	115726911	115727397	0.85597999999999996	0.550541	10	0.66286	0.11232	chr8:115726911-115727397	-2.56109	Distal Intergenic	chr8	115727397	-2.56109	chr8	115221337	115221779	1.3904000000000001E-7	0.589439	19	0.84356	0.25412	chr8:115221337-115221779	gene_body	chr8	115221779	-1.73098	Shared
8.22335e-35	-5.16487	0.519	0.632	2.65491e-30	Maf	Maf	chr8	115726911	115727397	0.85597999999999996	0.550541	10	0.66286	0.11232	chr8:115726911-115727397	-2.56109	Distal Intergenic	chr8	115727397	-2.56109	chr8	115236878	115237407	0.00037861	0.517670	22	0.66972	0.15205	chr8:115236878-115237407	gene_body	chr8	115237407	-2.13901	Shared
8.22335e-35	-5.16487	0.519	0.632	2.65491e-30	Maf	Maf	chr8	115726911	115727397	0.85597999999999996	0.550541	10	0.66286	0.11232	chr8:115726911-115727397	-2.56109	Distal Intergenic	chr8	115727397	-2.56109	chr8	115531285	115531551	3.2585999999999997E-4	0.596978	16	0.86303	0.26605	chr8:115531285-115531551	Distal Intergenic	chr8	115531551	-1.69771	Shared
8.22335e-35	-5.16487	0.519	0.632	2.65491e-30	Maf	Maf	chr8	115726911	115727397	0.85597999999999996	0.550541	10	0.66286	0.11232	chr8:115726911-115727397	-2.56109	Distal Intergenic	chr8	115727397	-2.56109	chr8	115698097	115701327	6.7214999999999999E-7	0.495149	66	0.76277	0.38572	chr8:115698097-115701327	gene_body	chr8	115701327	-0.983694	Shared
8.22335e-35	-5.16487	0.519	0.632	2.65491e-30	Maf	Maf	chr8	115726911	115727397	0.85597999999999996	0.550541	10	0.66286	0.11232	chr8:115726911-115727397	-2.56109	Distal Intergenic	chr8	115727397	-2.56109	chr8	115726910	115727398	6.7926999999999996E-3	0.603866	12	0.67016	0.066298	chr8:115726910-115727398	Distal Intergenic	chr8	115727398	-3.33747	Shared
8.22335e-35	-5.16487	0.519	0.632	2.65491e-30	Maf	Maf	chr8	115726911	115727397	0.85597999999999996	0.550541	10	0.66286	0.11232	chr8:115726911-115727397	-2.56109	Distal Intergenic	chr8	115727397	-2.56109	chr8	115742245	115742544	0.0028377	0.615641	10	0.84477	0.22913	chr8:115742245-115742544	Distal Intergenic	chr8	115742544	-1.88239	Shared
8.22335e-35	-5.16487	0.519	0.632	2.65491e-30	Maf	Maf	chr8	115726911	115727397	0.85597999999999996	0.550541	10	0.66286	0.11232	chr8:115726911-115727397	-2.56109	Distal Intergenic	chr8	115727397	-2.56109	chr8	115742996	115743269	0.15781999999999999	0.665582	10	0.72977	0.064186	chr8:115742996-115743269	Distal Intergenic	chr8	115743269	-3.50711	Shared
8.22335e-35	-5.16487	0.519	0.632	2.65491e-30	Maf	Maf	chr8	115742996	115743269	0.32915	0.648906	10	0.72977	0.080862	chr8:115742996-115743269	-3.17391	Distal Intergenic	chr8	115743269	-3.17391	chr8	115126422	115127233	0.0012257	0.362639	27	0.72261	0.35997	chr8:115126422-115127233	gene_body	chr8	115127233	-1.00534	Shared
8.22335e-35	-5.16487	0.519	0.632	2.65491e-30	Maf	Maf	chr8	115742996	115743269	0.32915	0.648906	10	0.72977	0.080862	chr8:115742996-115743269	-3.17391	Distal Intergenic	chr8	115743269	-3.17391	chr8	115136805	115137141	1.6086999999999999E-16	0.612081	29	0.70243	0.090352	chr8:115136805-115137141	gene_body	chr8	115137141	-2.95873	Shared
8.22335e-35	-5.16487	0.519	0.632	2.65491e-30	Maf	Maf	chr8	115742996	115743269	0.32915	0.648906	10	0.72977	0.080862	chr8:115742996-115743269	-3.17391	Distal Intergenic	chr8	115743269	-3.17391	chr8	115221337	115221779	1.3904000000000001E-7	0.589439	19	0.84356	0.25412	chr8:115221337-115221779	gene_body	chr8	115221779	-1.73098	Shared
8.22335e-35	-5.16487	0.519	0.632	2.65491e-30	Maf	Maf	chr8	115742996	115743269	0.32915	0.648906	10	0.72977	0.080862	chr8:115742996-115743269	-3.17391	Distal Intergenic	chr8	115743269	-3.17391	chr8	115236878	115237407	0.00037861	0.517670	22	0.66972	0.15205	chr8:115236878-115237407	gene_body	chr8	115237407	-2.13901	Shared
8.22335e-35	-5.16487	0.519	0.632	2.65491e-30	Maf	Maf	chr8	115742996	115743269	0.32915	0.648906	10	0.72977	0.080862	chr8:115742996-115743269	-3.17391	Distal Intergenic	chr8	115743269	-3.17391	chr8	115531285	115531551	3.2585999999999997E-4	0.596978	16	0.86303	0.26605	chr8:115531285-115531551	Distal Intergenic	chr8	115531551	-1.69771	Shared
8.22335e-35	-5.16487	0.519	0.632	2.65491e-30	Maf	Maf	chr8	115742996	115743269	0.32915	0.648906	10	0.72977	0.080862	chr8:115742996-115743269	-3.17391	Distal Intergenic	chr8	115743269	-3.17391	chr8	115698097	115701327	6.7214999999999999E-7	0.495149	66	0.76277	0.38572	chr8:115698097-115701327	gene_body	chr8	115701327	-0.983694	Shared
8.22335e-35	-5.16487	0.519	0.632	2.65491e-30	Maf	Maf	chr8	115742996	115743269	0.32915	0.648906	10	0.72977	0.080862	chr8:115742996-115743269	-3.17391	Distal Intergenic	chr8	115743269	-3.17391	chr8	115726910	115727398	6.7926999999999996E-3	0.603866	12	0.67016	0.066298	chr8:115726910-115727398	Distal Intergenic	chr8	115727398	-3.33747	Shared
8.22335e-35	-5.16487	0.519	0.632	2.65491e-30	Maf	Maf	chr8	115742996	115743269	0.32915	0.648906	10	0.72977	0.080862	chr8:115742996-115743269	-3.17391	Distal Intergenic	chr8	115743269	-3.17391	chr8	115742245	115742544	0.0028377	0.615641	10	0.84477	0.22913	chr8:115742245-115742544	Distal Intergenic	chr8	115742544	-1.88239	Shared
8.22335e-35	-5.16487	0.519	0.632	2.65491e-30	Maf	Maf	chr8	115742996	115743269	0.32915	0.648906	10	0.72977	0.080862	chr8:115742996-115743269	-3.17391	Distal Intergenic	chr8	115743269	-3.17391	chr8	115742996	115743269	0.15781999999999999	0.665582	10	0.72977	0.064186	chr8:115742996-115743269	Distal Intergenic	chr8	115743269	-3.50711	Shared
8.22335e-35	-5.16487	0.519	0.632	2.65491e-30	Maf	Maf	chr8	115742080	115742596	1.0295E-3	0.553536	22	0.83236	0.27883	chr8:115742080-115742596	-1.57782	Distal Intergenic	chr8	115742596	-1.57782	chr8	115126422	115127233	0.0012257	0.362639	27	0.72261	0.35997	chr8:115126422-115127233	gene_body	chr8	115127233	-1.00534	Shared
8.22335e-35	-5.16487	0.519	0.632	2.65491e-30	Maf	Maf	chr8	115742080	115742596	1.0295E-3	0.553536	22	0.83236	0.27883	chr8:115742080-115742596	-1.57782	Distal Intergenic	chr8	115742596	-1.57782	chr8	115136805	115137141	1.6086999999999999E-16	0.612081	29	0.70243	0.090352	chr8:115136805-115137141	gene_body	chr8	115137141	-2.95873	Shared
8.22335e-35	-5.16487	0.519	0.632	2.65491e-30	Maf	Maf	chr8	115742080	115742596	1.0295E-3	0.553536	22	0.83236	0.27883	chr8:115742080-115742596	-1.57782	Distal Intergenic	chr8	115742596	-1.57782	chr8	115221337	115221779	1.3904000000000001E-7	0.589439	19	0.84356	0.25412	chr8:115221337-115221779	gene_body	chr8	115221779	-1.73098	Shared
8.22335e-35	-5.16487	0.519	0.632	2.65491e-30	Maf	Maf	chr8	115742080	115742596	1.0295E-3	0.553536	22	0.83236	0.27883	chr8:115742080-115742596	-1.57782	Distal Intergenic	chr8	115742596	-1.57782	chr8	115236878	115237407	0.00037861	0.517670	22	0.66972	0.15205	chr8:115236878-115237407	gene_body	chr8	115237407	-2.13901	Shared
8.22335e-35	-5.16487	0.519	0.632	2.65491e-30	Maf	Maf	chr8	115742080	115742596	1.0295E-3	0.553536	22	0.83236	0.27883	chr8:115742080-115742596	-1.57782	Distal Intergenic	chr8	115742596	-1.57782	chr8	115531285	115531551	3.2585999999999997E-4	0.596978	16	0.86303	0.26605	chr8:115531285-115531551	Distal Intergenic	chr8	115531551	-1.69771	Shared
8.22335e-35	-5.16487	0.519	0.632	2.65491e-30	Maf	Maf	chr8	115742080	115742596	1.0295E-3	0.553536	22	0.83236	0.27883	chr8:115742080-115742596	-1.57782	Distal Intergenic	chr8	115742596	-1.57782	chr8	115698097	115701327	6.7214999999999999E-7	0.495149	66	0.76277	0.38572	chr8:115698097-115701327	gene_body	chr8	115701327	-0.983694	Shared
8.22335e-35	-5.16487	0.519	0.632	2.65491e-30	Maf	Maf	chr8	115742080	115742596	1.0295E-3	0.553536	22	0.83236	0.27883	chr8:115742080-115742596	-1.57782	Distal Intergenic	chr8	115742596	-1.57782	chr8	115726910	115727398	6.7926999999999996E-3	0.603866	12	0.67016	0.066298	chr8:115726910-115727398	Distal Intergenic	chr8	115727398	-3.33747	Shared
8.22335e-35	-5.16487	0.519	0.632	2.65491e-30	Maf	Maf	chr8	115742080	115742596	1.0295E-3	0.553536	22	0.83236	0.27883	chr8:115742080-115742596	-1.57782	Distal Intergenic	chr8	115742596	-1.57782	chr8	115742245	115742544	0.0028377	0.615641	10	0.84477	0.22913	chr8:115742245-115742544	Distal Intergenic	chr8	115742544	-1.88239	Shared
8.22335e-35	-5.16487	0.519	0.632	2.65491e-30	Maf	Maf	chr8	115742080	115742596	1.0295E-3	0.553536	22	0.83236	0.27883	chr8:115742080-115742596	-1.57782	Distal Intergenic	chr8	115742596	-1.57782	chr8	115742996	115743269	0.15781999999999999	0.665582	10	0.72977	0.064186	chr8:115742996-115743269	Distal Intergenic	chr8	115743269	-3.50711	Shared
4.74722e-33	-0.384861	0.046	0.131	1.53264e-28	Smad3	Smad3	chr9	63718701	63719178	1.8515000000000001E-5	0.536405	18	0.77458	0.23817	chr9:63718701-63719178	-1.70142	gene_body	chr9	63719178	-1.70142	chr9	63718171	63719171	0.0054517	0.316412	30	0.68882	0.3724	chr9:63718171-63719171	gene_body	chr9	63719171	-0.887274	Shared
7.53664e-33	3.72632	0.078	0.023	2.4332e-28	Il10	Il10	chr1	130993379	130994793	1.2848E-11	0.539621	37	0.65482	0.1152	chr1:130993379-130994793	-2.50696	Distal Intergenic	chr1	130994793	-2.50696	chr1	130993379	130994793	1.1250999999999999E-12	0.537235	37	0.65482	0.11758	chr1:130993379-130994793	Distal Intergenic	chr1	130994793	-2.47746	Shared
7.53664e-33	3.72632	0.078	0.023	2.4332e-28	Il10	Il10	chr1	130993379	130994793	1.2848E-11	0.539621	37	0.65482	0.1152	chr1:130993379-130994793	-2.50696	Distal Intergenic	chr1	130994793	-2.50696	chr1	130996098	130996612	8.4584000000000002E-5	0.342512	38	0.75525	0.41274	chr1:130996098-130996612	Distal Intergenic	chr1	130996612	-0.871721	Shared
7.53664e-33	3.72632	0.078	0.023	2.4332e-28	Il10	Il10	chr1	130993379	130994793	1.2848E-11	0.539621	37	0.65482	0.1152	chr1:130993379-130994793	-2.50696	Distal Intergenic	chr1	130994793	-2.50696	chr1	131003215	131003749	8.3374999999999998E-14	0.377095	30	0.88548	0.50839	chr1:131003215-131003749	Distal Intergenic	chr1	131003749	-0.800524	Shared
7.53664e-33	3.72632	0.078	0.023	2.4332e-28	Il10	Il10	chr1	130993379	130994793	1.2848E-11	0.539621	37	0.65482	0.1152	chr1:130993379-130994793	-2.50696	Distal Intergenic	chr1	130994793	-2.50696	chr1	131010317	131010968	5.1819999999999999E-18	0.615278	34	0.65482	0.03954	chr1:131010317-131010968	Distal Intergenic	chr1	131010968	-4.04971	Shared
7.53664e-33	3.72632	0.078	0.023	2.4332e-28	Il10	Il10	chr1	130993379	130994793	1.2848E-11	0.539621	37	0.65482	0.1152	chr1:130993379-130994793	-2.50696	Distal Intergenic	chr1	130994793	-2.50696	chr1	131021620	131022216	2.1984E-2	0.388599	25	0.56092	0.17232	chr1:131021620-131022216	gene_body	chr1	131022216	-1.7027	Shared
7.53664e-33	3.72632	0.078	0.023	2.4332e-28	Il10	Il10	chr1	130993379	130994793	1.2848E-11	0.539621	37	0.65482	0.1152	chr1:130993379-130994793	-2.50696	Distal Intergenic	chr1	130994793	-2.50696	chr1	131038785	131039116	0.00022765	0.454385	14	0.68715	0.23276	chr1:131038785-131039116	Distal Intergenic	chr1	131039116	-1.56178	Shared
7.53664e-33	3.72632	0.078	0.023	2.4332e-28	Il10	Il10	chr1	130996098	130996726	1.5118000000000001E-12	0.483648	44	0.75355	0.2699	chr1:130996098-130996726	-1.48128	Distal Intergenic	chr1	130996726	-1.48128	chr1	130993379	130994793	1.1250999999999999E-12	0.537235	37	0.65482	0.11758	chr1:130993379-130994793	Distal Intergenic	chr1	130994793	-2.47746	Shared
7.53664e-33	3.72632	0.078	0.023	2.4332e-28	Il10	Il10	chr1	130996098	130996726	1.5118000000000001E-12	0.483648	44	0.75355	0.2699	chr1:130996098-130996726	-1.48128	Distal Intergenic	chr1	130996726	-1.48128	chr1	130996098	130996612	8.4584000000000002E-5	0.342512	38	0.75525	0.41274	chr1:130996098-130996612	Distal Intergenic	chr1	130996612	-0.871721	Shared
7.53664e-33	3.72632	0.078	0.023	2.4332e-28	Il10	Il10	chr1	130996098	130996726	1.5118000000000001E-12	0.483648	44	0.75355	0.2699	chr1:130996098-130996726	-1.48128	Distal Intergenic	chr1	130996726	-1.48128	chr1	131003215	131003749	8.3374999999999998E-14	0.377095	30	0.88548	0.50839	chr1:131003215-131003749	Distal Intergenic	chr1	131003749	-0.800524	Shared
7.53664e-33	3.72632	0.078	0.023	2.4332e-28	Il10	Il10	chr1	130996098	130996726	1.5118000000000001E-12	0.483648	44	0.75355	0.2699	chr1:130996098-130996726	-1.48128	Distal Intergenic	chr1	130996726	-1.48128	chr1	131010317	131010968	5.1819999999999999E-18	0.615278	34	0.65482	0.03954	chr1:131010317-131010968	Distal Intergenic	chr1	131010968	-4.04971	Shared
7.53664e-33	3.72632	0.078	0.023	2.4332e-28	Il10	Il10	chr1	130996098	130996726	1.5118000000000001E-12	0.483648	44	0.75355	0.2699	chr1:130996098-130996726	-1.48128	Distal Intergenic	chr1	130996726	-1.48128	chr1	131021620	131022216	2.1984E-2	0.388599	25	0.56092	0.17232	chr1:131021620-131022216	gene_body	chr1	131022216	-1.7027	Shared
7.53664e-33	3.72632	0.078	0.023	2.4332e-28	Il10	Il10	chr1	130996098	130996726	1.5118000000000001E-12	0.483648	44	0.75355	0.2699	chr1:130996098-130996726	-1.48128	Distal Intergenic	chr1	130996726	-1.48128	chr1	131038785	131039116	0.00022765	0.454385	14	0.68715	0.23276	chr1:131038785-131039116	Distal Intergenic	chr1	131039116	-1.56178	Shared
7.53664e-33	3.72632	0.078	0.023	2.4332e-28	Il10	Il10	chr1	130999569	130999968	7.3629000000000003E-3	0.725542	12	0.76875	0.043209	chr1:130999569-130999968	-4.15311	Distal Intergenic	chr1	130999968	-4.15311	chr1	130993379	130994793	1.1250999999999999E-12	0.537235	37	0.65482	0.11758	chr1:130993379-130994793	Distal Intergenic	chr1	130994793	-2.47746	Shared
7.53664e-33	3.72632	0.078	0.023	2.4332e-28	Il10	Il10	chr1	130999569	130999968	7.3629000000000003E-3	0.725542	12	0.76875	0.043209	chr1:130999569-130999968	-4.15311	Distal Intergenic	chr1	130999968	-4.15311	chr1	130996098	130996612	8.4584000000000002E-5	0.342512	38	0.75525	0.41274	chr1:130996098-130996612	Distal Intergenic	chr1	130996612	-0.871721	Shared
7.53664e-33	3.72632	0.078	0.023	2.4332e-28	Il10	Il10	chr1	130999569	130999968	7.3629000000000003E-3	0.725542	12	0.76875	0.043209	chr1:130999569-130999968	-4.15311	Distal Intergenic	chr1	130999968	-4.15311	chr1	131003215	131003749	8.3374999999999998E-14	0.377095	30	0.88548	0.50839	chr1:131003215-131003749	Distal Intergenic	chr1	131003749	-0.800524	Shared
7.53664e-33	3.72632	0.078	0.023	2.4332e-28	Il10	Il10	chr1	130999569	130999968	7.3629000000000003E-3	0.725542	12	0.76875	0.043209	chr1:130999569-130999968	-4.15311	Distal Intergenic	chr1	130999968	-4.15311	chr1	131010317	131010968	5.1819999999999999E-18	0.615278	34	0.65482	0.03954	chr1:131010317-131010968	Distal Intergenic	chr1	131010968	-4.04971	Shared
7.53664e-33	3.72632	0.078	0.023	2.4332e-28	Il10	Il10	chr1	130999569	130999968	7.3629000000000003E-3	0.725542	12	0.76875	0.043209	chr1:130999569-130999968	-4.15311	Distal Intergenic	chr1	130999968	-4.15311	chr1	131021620	131022216	2.1984E-2	0.388599	25	0.56092	0.17232	chr1:131021620-131022216	gene_body	chr1	131022216	-1.7027	Shared
7.53664e-33	3.72632	0.078	0.023	2.4332e-28	Il10	Il10	chr1	130999569	130999968	7.3629000000000003E-3	0.725542	12	0.76875	0.043209	chr1:130999569-130999968	-4.15311	Distal Intergenic	chr1	130999968	-4.15311	chr1	131038785	131039116	0.00022765	0.454385	14	0.68715	0.23276	chr1:131038785-131039116	Distal Intergenic	chr1	131039116	-1.56178	Shared
7.53664e-33	3.72632	0.078	0.023	2.4332e-28	Il10	Il10	chr1	131000271	131000859	2.1321999999999999E-3	0.539680	14	0.86094	0.32126	chr1:131000271-131000859	-1.42217	Distal Intergenic	chr1	131000859	-1.42217	chr1	130993379	130994793	1.1250999999999999E-12	0.537235	37	0.65482	0.11758	chr1:130993379-130994793	Distal Intergenic	chr1	130994793	-2.47746	Shared
7.53664e-33	3.72632	0.078	0.023	2.4332e-28	Il10	Il10	chr1	131000271	131000859	2.1321999999999999E-3	0.539680	14	0.86094	0.32126	chr1:131000271-131000859	-1.42217	Distal Intergenic	chr1	131000859	-1.42217	chr1	130996098	130996612	8.4584000000000002E-5	0.342512	38	0.75525	0.41274	chr1:130996098-130996612	Distal Intergenic	chr1	130996612	-0.871721	Shared
7.53664e-33	3.72632	0.078	0.023	2.4332e-28	Il10	Il10	chr1	131000271	131000859	2.1321999999999999E-3	0.539680	14	0.86094	0.32126	chr1:131000271-131000859	-1.42217	Distal Intergenic	chr1	131000859	-1.42217	chr1	131003215	131003749	8.3374999999999998E-14	0.377095	30	0.88548	0.50839	chr1:131003215-131003749	Distal Intergenic	chr1	131003749	-0.800524	Shared
7.53664e-33	3.72632	0.078	0.023	2.4332e-28	Il10	Il10	chr1	131000271	131000859	2.1321999999999999E-3	0.539680	14	0.86094	0.32126	chr1:131000271-131000859	-1.42217	Distal Intergenic	chr1	131000859	-1.42217	chr1	131010317	131010968	5.1819999999999999E-18	0.615278	34	0.65482	0.03954	chr1:131010317-131010968	Distal Intergenic	chr1	131010968	-4.04971	Shared
7.53664e-33	3.72632	0.078	0.023	2.4332e-28	Il10	Il10	chr1	131000271	131000859	2.1321999999999999E-3	0.539680	14	0.86094	0.32126	chr1:131000271-131000859	-1.42217	Distal Intergenic	chr1	131000859	-1.42217	chr1	131021620	131022216	2.1984E-2	0.388599	25	0.56092	0.17232	chr1:131021620-131022216	gene_body	chr1	131022216	-1.7027	Shared
7.53664e-33	3.72632	0.078	0.023	2.4332e-28	Il10	Il10	chr1	131000271	131000859	2.1321999999999999E-3	0.539680	14	0.86094	0.32126	chr1:131000271-131000859	-1.42217	Distal Intergenic	chr1	131000859	-1.42217	chr1	131038785	131039116	0.00022765	0.454385	14	0.68715	0.23276	chr1:131038785-131039116	Distal Intergenic	chr1	131039116	-1.56178	Shared
7.53664e-33	3.72632	0.078	0.023	2.4332e-28	Il10	Il10	chr1	131003031	131003987	9.1610999999999994E-21	0.616383	37	0.8562	0.23982	chr1:131003031-131003987	-1.836	Distal Intergenic	chr1	131003987	-1.836	chr1	130993379	130994793	1.1250999999999999E-12	0.537235	37	0.65482	0.11758	chr1:130993379-130994793	Distal Intergenic	chr1	130994793	-2.47746	Shared
7.53664e-33	3.72632	0.078	0.023	2.4332e-28	Il10	Il10	chr1	131003031	131003987	9.1610999999999994E-21	0.616383	37	0.8562	0.23982	chr1:131003031-131003987	-1.836	Distal Intergenic	chr1	131003987	-1.836	chr1	130996098	130996612	8.4584000000000002E-5	0.342512	38	0.75525	0.41274	chr1:130996098-130996612	Distal Intergenic	chr1	130996612	-0.871721	Shared
7.53664e-33	3.72632	0.078	0.023	2.4332e-28	Il10	Il10	chr1	131003031	131003987	9.1610999999999994E-21	0.616383	37	0.8562	0.23982	chr1:131003031-131003987	-1.836	Distal Intergenic	chr1	131003987	-1.836	chr1	131003215	131003749	8.3374999999999998E-14	0.377095	30	0.88548	0.50839	chr1:131003215-131003749	Distal Intergenic	chr1	131003749	-0.800524	Shared
7.53664e-33	3.72632	0.078	0.023	2.4332e-28	Il10	Il10	chr1	131003031	131003987	9.1610999999999994E-21	0.616383	37	0.8562	0.23982	chr1:131003031-131003987	-1.836	Distal Intergenic	chr1	131003987	-1.836	chr1	131010317	131010968	5.1819999999999999E-18	0.615278	34	0.65482	0.03954	chr1:131010317-131010968	Distal Intergenic	chr1	131010968	-4.04971	Shared
7.53664e-33	3.72632	0.078	0.023	2.4332e-28	Il10	Il10	chr1	131003031	131003987	9.1610999999999994E-21	0.616383	37	0.8562	0.23982	chr1:131003031-131003987	-1.836	Distal Intergenic	chr1	131003987	-1.836	chr1	131021620	131022216	2.1984E-2	0.388599	25	0.56092	0.17232	chr1:131021620-131022216	gene_body	chr1	131022216	-1.7027	Shared
7.53664e-33	3.72632	0.078	0.023	2.4332e-28	Il10	Il10	chr1	131003031	131003987	9.1610999999999994E-21	0.616383	37	0.8562	0.23982	chr1:131003031-131003987	-1.836	Distal Intergenic	chr1	131003987	-1.836	chr1	131038785	131039116	0.00022765	0.454385	14	0.68715	0.23276	chr1:131038785-131039116	Distal Intergenic	chr1	131039116	-1.56178	Shared
7.53664e-33	3.72632	0.078	0.023	2.4332e-28	Il10	Il10	chr1	131010317	131010968	1.5626E-17	0.630373	34	0.65482	0.024446	chr1:131010317-131010968	-4.74343	Distal Intergenic	chr1	131010968	-4.74343	chr1	130993379	130994793	1.1250999999999999E-12	0.537235	37	0.65482	0.11758	chr1:130993379-130994793	Distal Intergenic	chr1	130994793	-2.47746	Shared
7.53664e-33	3.72632	0.078	0.023	2.4332e-28	Il10	Il10	chr1	131010317	131010968	1.5626E-17	0.630373	34	0.65482	0.024446	chr1:131010317-131010968	-4.74343	Distal Intergenic	chr1	131010968	-4.74343	chr1	130996098	130996612	8.4584000000000002E-5	0.342512	38	0.75525	0.41274	chr1:130996098-130996612	Distal Intergenic	chr1	130996612	-0.871721	Shared
7.53664e-33	3.72632	0.078	0.023	2.4332e-28	Il10	Il10	chr1	131010317	131010968	1.5626E-17	0.630373	34	0.65482	0.024446	chr1:131010317-131010968	-4.74343	Distal Intergenic	chr1	131010968	-4.74343	chr1	131003215	131003749	8.3374999999999998E-14	0.377095	30	0.88548	0.50839	chr1:131003215-131003749	Distal Intergenic	chr1	131003749	-0.800524	Shared
7.53664e-33	3.72632	0.078	0.023	2.4332e-28	Il10	Il10	chr1	131010317	131010968	1.5626E-17	0.630373	34	0.65482	0.024446	chr1:131010317-131010968	-4.74343	Distal Intergenic	chr1	131010968	-4.74343	chr1	131010317	131010968	5.1819999999999999E-18	0.615278	34	0.65482	0.03954	chr1:131010317-131010968	Distal Intergenic	chr1	131010968	-4.04971	Shared
7.53664e-33	3.72632	0.078	0.023	2.4332e-28	Il10	Il10	chr1	131010317	131010968	1.5626E-17	0.630373	34	0.65482	0.024446	chr1:131010317-131010968	-4.74343	Distal Intergenic	chr1	131010968	-4.74343	chr1	131021620	131022216	2.1984E-2	0.388599	25	0.56092	0.17232	chr1:131021620-131022216	gene_body	chr1	131022216	-1.7027	Shared
7.53664e-33	3.72632	0.078	0.023	2.4332e-28	Il10	Il10	chr1	131010317	131010968	1.5626E-17	0.630373	34	0.65482	0.024446	chr1:131010317-131010968	-4.74343	Distal Intergenic	chr1	131010968	-4.74343	chr1	131038785	131039116	0.00022765	0.454385	14	0.68715	0.23276	chr1:131038785-131039116	Distal Intergenic	chr1	131039116	-1.56178	Shared
7.53664e-33	3.72632	0.078	0.023	2.4332e-28	Il10	Il10	chr1	131038046	131038392	0.025291	0.529822	10	0.5702	0.040377	chr1:131038046-131038392	-3.81986	Distal Intergenic	chr1	131038392	-3.81986	chr1	130993379	130994793	1.1250999999999999E-12	0.537235	37	0.65482	0.11758	chr1:130993379-130994793	Distal Intergenic	chr1	130994793	-2.47746	Shared
7.53664e-33	3.72632	0.078	0.023	2.4332e-28	Il10	Il10	chr1	131038046	131038392	0.025291	0.529822	10	0.5702	0.040377	chr1:131038046-131038392	-3.81986	Distal Intergenic	chr1	131038392	-3.81986	chr1	130996098	130996612	8.4584000000000002E-5	0.342512	38	0.75525	0.41274	chr1:130996098-130996612	Distal Intergenic	chr1	130996612	-0.871721	Shared
7.53664e-33	3.72632	0.078	0.023	2.4332e-28	Il10	Il10	chr1	131038046	131038392	0.025291	0.529822	10	0.5702	0.040377	chr1:131038046-131038392	-3.81986	Distal Intergenic	chr1	131038392	-3.81986	chr1	131003215	131003749	8.3374999999999998E-14	0.377095	30	0.88548	0.50839	chr1:131003215-131003749	Distal Intergenic	chr1	131003749	-0.800524	Shared
7.53664e-33	3.72632	0.078	0.023	2.4332e-28	Il10	Il10	chr1	131038046	131038392	0.025291	0.529822	10	0.5702	0.040377	chr1:131038046-131038392	-3.81986	Distal Intergenic	chr1	131038392	-3.81986	chr1	131010317	131010968	5.1819999999999999E-18	0.615278	34	0.65482	0.03954	chr1:131010317-131010968	Distal Intergenic	chr1	131010968	-4.04971	Shared
7.53664e-33	3.72632	0.078	0.023	2.4332e-28	Il10	Il10	chr1	131038046	131038392	0.025291	0.529822	10	0.5702	0.040377	chr1:131038046-131038392	-3.81986	Distal Intergenic	chr1	131038392	-3.81986	chr1	131021620	131022216	2.1984E-2	0.388599	25	0.56092	0.17232	chr1:131021620-131022216	gene_body	chr1	131022216	-1.7027	Shared
7.53664e-33	3.72632	0.078	0.023	2.4332e-28	Il10	Il10	chr1	131038046	131038392	0.025291	0.529822	10	0.5702	0.040377	chr1:131038046-131038392	-3.81986	Distal Intergenic	chr1	131038392	-3.81986	chr1	131038785	131039116	0.00022765	0.454385	14	0.68715	0.23276	chr1:131038785-131039116	Distal Intergenic	chr1	131039116	-1.56178	Shared
7.53664e-33	3.72632	0.078	0.023	2.4332e-28	Il10	Il10	chr1	131038785	131039216	1.3028E-3	0.580067	18	0.72894	0.14887	chr1:131038785-131039216	-2.29175	Distal Intergenic	chr1	131039216	-2.29175	chr1	130993379	130994793	1.1250999999999999E-12	0.537235	37	0.65482	0.11758	chr1:130993379-130994793	Distal Intergenic	chr1	130994793	-2.47746	Shared
7.53664e-33	3.72632	0.078	0.023	2.4332e-28	Il10	Il10	chr1	131038785	131039216	1.3028E-3	0.580067	18	0.72894	0.14887	chr1:131038785-131039216	-2.29175	Distal Intergenic	chr1	131039216	-2.29175	chr1	130996098	130996612	8.4584000000000002E-5	0.342512	38	0.75525	0.41274	chr1:130996098-130996612	Distal Intergenic	chr1	130996612	-0.871721	Shared
7.53664e-33	3.72632	0.078	0.023	2.4332e-28	Il10	Il10	chr1	131038785	131039216	1.3028E-3	0.580067	18	0.72894	0.14887	chr1:131038785-131039216	-2.29175	Distal Intergenic	chr1	131039216	-2.29175	chr1	131003215	131003749	8.3374999999999998E-14	0.377095	30	0.88548	0.50839	chr1:131003215-131003749	Distal Intergenic	chr1	131003749	-0.800524	Shared
7.53664e-33	3.72632	0.078	0.023	2.4332e-28	Il10	Il10	chr1	131038785	131039216	1.3028E-3	0.580067	18	0.72894	0.14887	chr1:131038785-131039216	-2.29175	Distal Intergenic	chr1	131039216	-2.29175	chr1	131010317	131010968	5.1819999999999999E-18	0.615278	34	0.65482	0.03954	chr1:131010317-131010968	Distal Intergenic	chr1	131010968	-4.04971	Shared
7.53664e-33	3.72632	0.078	0.023	2.4332e-28	Il10	Il10	chr1	131038785	131039216	1.3028E-3	0.580067	18	0.72894	0.14887	chr1:131038785-131039216	-2.29175	Distal Intergenic	chr1	131039216	-2.29175	chr1	131021620	131022216	2.1984E-2	0.388599	25	0.56092	0.17232	chr1:131021620-131022216	gene_body	chr1	131022216	-1.7027	Shared
7.53664e-33	3.72632	0.078	0.023	2.4332e-28	Il10	Il10	chr1	131038785	131039216	1.3028E-3	0.580067	18	0.72894	0.14887	chr1:131038785-131039216	-2.29175	Distal Intergenic	chr1	131039216	-2.29175	chr1	131038785	131039116	0.00022765	0.454385	14	0.68715	0.23276	chr1:131038785-131039116	Distal Intergenic	chr1	131039116	-1.56178	Shared
1.32604e-32	-6.81083	0.295	0.423	4.28111e-28	Ldlrad4	Ldlrad4	chr18	68052806	68053232	1.3919999999999999E-9	0.603784	20	0.75465	0.15087	chr18:68052806-68053232	-2.3225	gene_body	chr18	68053232	-2.3225	chr18	67967297	67967518	0.00083639	-0.361453	16	0.15091	0.51236	chr18:67967297-67967518	gene_body	chr18	67967518	1.76347	Shared
1.32604e-32	-6.81083	0.295	0.423	4.28111e-28	Ldlrad4	Ldlrad4	chr18	68052806	68053232	1.3919999999999999E-9	0.603784	20	0.75465	0.15087	chr18:68052806-68053232	-2.3225	gene_body	chr18	68053232	-2.3225	chr18	68052806	68053232	1.1024E-7	0.605106	20	0.75465	0.14955	chr18:68052806-68053232	gene_body	chr18	68053232	-2.33518	Shared
1.55645e-32	-0.709189	0.111	0.21	5.025e-28	Ksr1	Ksr1															chr11	79130331	79130765	4.5276999999999998E-2	0.526109	14	0.71409	0.18798	chr11:79130331-79130765	gene_body	chr11	79130765	-1.92553	only TFH
4.09176e-32	-0.243755	0.027	0.095	1.32102e-27	Tigit	Tigit	chr16	43661519	43661851	1.5152E-3	0.761982	12	0.78204	0.020059	chr16:43661519-43661851	-5.28492	gene_body	chr16	43661851	-5.28492	chr16	43661519	43661851	2.4329000000000001E-4	0.753806	12	0.78204	0.028235	chr16:43661519-43661851	gene_body	chr16	43661851	-4.79169	Shared
4.09176e-32	-0.243755	0.027	0.095	1.32102e-27	Tigit	Tigit	chr16	43661519	43661851	1.5152E-3	0.761982	12	0.78204	0.020059	chr16:43661519-43661851	-5.28492	gene_body	chr16	43661851	-5.28492	chr16	43694037	43694428	1.2426999999999999E-14	0.642914	28	0.65802	0.015102	chr16:43694037-43694428	gene_body	chr16	43694428	-5.44532	Shared
4.09176e-32	-0.243755	0.027	0.095	1.32102e-27	Tigit	Tigit	chr16	43661519	43661851	1.5152E-3	0.761982	12	0.78204	0.020059	chr16:43661519-43661851	-5.28492	gene_body	chr16	43661851	-5.28492	chr16	43700545	43701282	1.9648999999999999E-21	0.600893	32	0.85893	0.25804	chr16:43700545-43701282	gene_body	chr16	43701282	-1.73495	Shared
4.09176e-32	-0.243755	0.027	0.095	1.32102e-27	Tigit	Tigit	chr16	43661519	43661851	1.5152E-3	0.761982	12	0.78204	0.020059	chr16:43661519-43661851	-5.28492	gene_body	chr16	43661851	-5.28492	chr16	43701774	43702109	0.00032338	0.607517	10	0.71232	0.1048	chr16:43701774-43702109	gene_body	chr16	43702109	-2.76489	Shared
4.09176e-32	-0.243755	0.027	0.095	1.32102e-27	Tigit	Tigit	chr16	43694037	43694428	2.6548000000000001E-14	0.630985	28	0.65802	0.027031	chr16:43694037-43694428	-4.60544	gene_body	chr16	43694428	-4.60544	chr16	43661519	43661851	2.4329000000000001E-4	0.753806	12	0.78204	0.028235	chr16:43661519-43661851	gene_body	chr16	43661851	-4.79169	Shared
4.09176e-32	-0.243755	0.027	0.095	1.32102e-27	Tigit	Tigit	chr16	43694037	43694428	2.6548000000000001E-14	0.630985	28	0.65802	0.027031	chr16:43694037-43694428	-4.60544	gene_body	chr16	43694428	-4.60544	chr16	43694037	43694428	1.2426999999999999E-14	0.642914	28	0.65802	0.015102	chr16:43694037-43694428	gene_body	chr16	43694428	-5.44532	Shared
4.09176e-32	-0.243755	0.027	0.095	1.32102e-27	Tigit	Tigit	chr16	43694037	43694428	2.6548000000000001E-14	0.630985	28	0.65802	0.027031	chr16:43694037-43694428	-4.60544	gene_body	chr16	43694428	-4.60544	chr16	43700545	43701282	1.9648999999999999E-21	0.600893	32	0.85893	0.25804	chr16:43700545-43701282	gene_body	chr16	43701282	-1.73495	Shared
4.09176e-32	-0.243755	0.027	0.095	1.32102e-27	Tigit	Tigit	chr16	43694037	43694428	2.6548000000000001E-14	0.630985	28	0.65802	0.027031	chr16:43694037-43694428	-4.60544	gene_body	chr16	43694428	-4.60544	chr16	43701774	43702109	0.00032338	0.607517	10	0.71232	0.1048	chr16:43701774-43702109	gene_body	chr16	43702109	-2.76489	Shared
4.09176e-32	-0.243755	0.027	0.095	1.32102e-27	Tigit	Tigit	chr16	43700433	43701033	5.6940999999999999E-17	0.591118	27	0.88115	0.29003	chr16:43700433-43701033	-1.60319	gene_body	chr16	43701033	-1.60319	chr16	43661519	43661851	2.4329000000000001E-4	0.753806	12	0.78204	0.028235	chr16:43661519-43661851	gene_body	chr16	43661851	-4.79169	Shared
4.09176e-32	-0.243755	0.027	0.095	1.32102e-27	Tigit	Tigit	chr16	43700433	43701033	5.6940999999999999E-17	0.591118	27	0.88115	0.29003	chr16:43700433-43701033	-1.60319	gene_body	chr16	43701033	-1.60319	chr16	43694037	43694428	1.2426999999999999E-14	0.642914	28	0.65802	0.015102	chr16:43694037-43694428	gene_body	chr16	43694428	-5.44532	Shared
4.09176e-32	-0.243755	0.027	0.095	1.32102e-27	Tigit	Tigit	chr16	43700433	43701033	5.6940999999999999E-17	0.591118	27	0.88115	0.29003	chr16:43700433-43701033	-1.60319	gene_body	chr16	43701033	-1.60319	chr16	43700545	43701282	1.9648999999999999E-21	0.600893	32	0.85893	0.25804	chr16:43700545-43701282	gene_body	chr16	43701282	-1.73495	Shared
4.09176e-32	-0.243755	0.027	0.095	1.32102e-27	Tigit	Tigit	chr16	43700433	43701033	5.6940999999999999E-17	0.591118	27	0.88115	0.29003	chr16:43700433-43701033	-1.60319	gene_body	chr16	43701033	-1.60319	chr16	43701774	43702109	0.00032338	0.607517	10	0.71232	0.1048	chr16:43701774-43702109	gene_body	chr16	43702109	-2.76489	Shared
2.14587e-31	-9.14679	0.461	0.569	6.92796e-27	Prkch	Prkch	chr12	73631514	73631894	0.022183	0.299767	18	0.38885	0.089083	chr12:73631514-73631894	-2.12599	gene_body	chr12	73631894	-2.12599	chr12	73611323	73611697	0.0089975	0.405288	16	0.54645	0.14116	chr12:73611323-73611697	gene_body	chr12	73611697	-1.95276	Shared
2.14587e-31	-9.14679	0.461	0.569	6.92796e-27	Prkch	Prkch	chr12	73631514	73631894	0.022183	0.299767	18	0.38885	0.089083	chr12:73631514-73631894	-2.12599	gene_body	chr12	73631894	-2.12599	chr12	73631514	73631851	0.020898	0.296102	16	0.37743	0.081331	chr12:73631514-73631851	gene_body	chr12	73631851	-2.21433	Shared
2.14587e-31	-9.14679	0.461	0.569	6.92796e-27	Prkch	Prkch	chr12	73631514	73631894	0.022183	0.299767	18	0.38885	0.089083	chr12:73631514-73631894	-2.12599	gene_body	chr12	73631894	-2.12599	chr12	73687264	73688095	7.4958000000000003E-6	-0.402719	25	0.15455	0.55727	chr12:73687264-73688095	gene_body	chr12	73688095	1.8503	Shared
2.14587e-31	-9.14679	0.461	0.569	6.92796e-27	Prkch	Prkch	chr12	73631514	73631894	0.022183	0.299767	18	0.38885	0.089083	chr12:73631514-73631894	-2.12599	gene_body	chr12	73631894	-2.12599	chr12	73708120	73709271	7.1863999999999999E-4	0.304153	34	0.80743	0.50327	chr12:73708120-73709271	gene_body	chr12	73709271	-0.682005	Shared
2.14587e-31	-9.14679	0.461	0.569	6.92796e-27	Prkch	Prkch	chr12	73631514	73631894	0.022183	0.299767	18	0.38885	0.089083	chr12:73631514-73631894	-2.12599	gene_body	chr12	73631894	-2.12599	chr12	73725729	73726626	1.5570000000000001E-6	0.510047	23	0.71077	0.20073	chr12:73725729-73726626	gene_body	chr12	73726626	-1.82413	Shared
4.26576e-31	-4.40693	0.074	0.163	1.3772e-26	Setbp1	Setbp1															chr18	79067709	79067988	0.0081263	0.297698	10	0.92516	0.62746	chr18:79067709-79067988	gene_body	chr18	79067988	-0.560179	only TFH
4.4196e-31	-1.25913	0.136	0.237	1.42687e-26	Heg1	Heg1	chr16	33606366	33607224	0.0026661	0.377002	18	0.45005	0.073046	chr16:33606366-33607224	-2.62321	gene_body	chr16	33607224	-2.62321	chr16	33606365	33607338	0.033363	0.319046	22	0.45222	0.13318	chr16:33606365-33607338	gene_body	chr16	33607338	-1.76365	Shared
9.54322e-31	-0.58016	0.344	0.481	3.08103e-26	Rnf19a	Rnf19a	chr15	36364128	36364387	0.15168000000000001	0.396395	10	0.40089	0.0044991	chr15:36364128-36364387	-6.47743	gene_body	chr15	36364387	-6.47743	chr15	36291065	36291299	3.9375E-2	0.611787	10	0.72736	0.11557	chr15:36291065-36291299	Distal Intergenic	chr15	36291299	-2.6539	Shared
9.54322e-31	-0.58016	0.344	0.481	3.08103e-26	Rnf19a	Rnf19a	chr15	36364128	36364387	0.15168000000000001	0.396395	10	0.40089	0.0044991	chr15:36364128-36364387	-6.47743	gene_body	chr15	36364387	-6.47743	chr15	36364128	36364387	0.00018287	0.390456	10	0.40089	0.010438	chr15:36364128-36364387	gene_body	chr15	36364387	-5.26329	Shared
9.54322e-31	-0.58016	0.344	0.481	3.08103e-26	Rnf19a	Rnf19a	chr15	36364128	36364387	0.15168000000000001	0.396395	10	0.40089	0.0044991	chr15:36364128-36364387	-6.47743	gene_body	chr15	36364387	-6.47743	chr15	36365409	36366014	6.9996999999999995E-4	0.542881	16	0.80291	0.26003	chr15:36365409-36366014	gene_body	chr15	36366014	-1.62656	Shared
1.92545e-30	-0.365856	0.017	0.08	6.21631e-26	Trib1	Trib1															chr15	59540429	59541171	1.4143000000000001E-3	0.359676	24	0.88208	0.5224	chr15:59540429-59541171	gene_body	chr15	59541171	-0.755755	only TFH
1.92545e-30	-0.365856	0.017	0.08	6.21631e-26	Trib1	Trib1															chr15	59650519	59651105	5.4722999999999998E-9	0.301553	24	0.31208	0.010529	chr15:59650519-59651105	gene_body	chr15	59651105	-4.88948	only TFH
2.77436e-30	-0.888247	0.176	0.286	8.95703e-26	Tbl1xr1	Tbl1xr1	chr3	21962194	21962397	0.0027731	0.504657	10	0.56842	0.063768	chr3:21962194-21962397	-3.15605	Distal Intergenic	chr3	21962397	-3.15605	chr3	21962194	21962397	0.025912	0.508056	10	0.56842	0.060368	chr3:21962194-21962397	Distal Intergenic	chr3	21962397	-3.2351	Shared
1.26597e-29	-0.226828	0.017	0.075	4.0872e-25	Egr2	Egr2	chr10	67483324	67484140	0.014295	0.391875	26	0.57879	0.18692	chr10:67483324-67484140	-1.63062	Distal Intergenic	chr10	67484140	-1.63062														only TR1
1.51978e-29	-1.71932	0.38	0.485	4.9066e-25	Nfatc1	Nfatc1	chr18	80671672	80671999	0.62970999999999999	0.536111	12	0.72653	0.19042	chr18:80671672-80671999	-1.93184	gene_body	chr18	80671999	-1.93184	chr18	80631489	80631987	2.4916000000000001E-3	0.488688	20	0.75129	0.26261	chr18:80631489-80631987	gene_body	chr18	80631987	-1.51645	Shared
1.51978e-29	-1.71932	0.38	0.485	4.9066e-25	Nfatc1	Nfatc1	chr18	80671672	80671999	0.62970999999999999	0.536111	12	0.72653	0.19042	chr18:80671672-80671999	-1.93184	gene_body	chr18	80671999	-1.93184	chr18	80654282	80654488	0.032547	0.225269	10	0.89387	0.6686	chr18:80654282-80654488	gene_body	chr18	80654488	-0.418922	Shared
1.51978e-29	-1.71932	0.38	0.485	4.9066e-25	Nfatc1	Nfatc1	chr18	80671672	80671999	0.62970999999999999	0.536111	12	0.72653	0.19042	chr18:80671672-80671999	-1.93184	gene_body	chr18	80671999	-1.93184	chr18	80671672	80671999	6.7085000000000006E-2	0.493940	12	0.72653	0.23259	chr18:80671672-80671999	gene_body	chr18	80671999	-1.64323	Shared
1.51978e-29	-1.71932	0.38	0.485	4.9066e-25	Nfatc1	Nfatc1	chr18	80671672	80671999	0.62970999999999999	0.536111	12	0.72653	0.19042	chr18:80671672-80671999	-1.93184	gene_body	chr18	80671999	-1.93184	chr18	80684127	80684744	9.8174000000000004E-11	0.528100	32	0.66432	0.13623	chr18:80684127-80684744	gene_body	chr18	80684744	-2.28583	Shared
1.51978e-29	-1.71932	0.38	0.485	4.9066e-25	Nfatc1	Nfatc1	chr18	80684126	80684744	8.2860999999999996E-14	0.597190	33	0.67021	0.07302	chr18:80684126-80684744	-3.19825	gene_body	chr18	80684744	-3.19825	chr18	80631489	80631987	2.4916000000000001E-3	0.488688	20	0.75129	0.26261	chr18:80631489-80631987	gene_body	chr18	80631987	-1.51645	Shared
1.51978e-29	-1.71932	0.38	0.485	4.9066e-25	Nfatc1	Nfatc1	chr18	80684126	80684744	8.2860999999999996E-14	0.597190	33	0.67021	0.07302	chr18:80684126-80684744	-3.19825	gene_body	chr18	80684744	-3.19825	chr18	80654282	80654488	0.032547	0.225269	10	0.89387	0.6686	chr18:80654282-80654488	gene_body	chr18	80654488	-0.418922	Shared
1.51978e-29	-1.71932	0.38	0.485	4.9066e-25	Nfatc1	Nfatc1	chr18	80684126	80684744	8.2860999999999996E-14	0.597190	33	0.67021	0.07302	chr18:80684126-80684744	-3.19825	gene_body	chr18	80684744	-3.19825	chr18	80671672	80671999	6.7085000000000006E-2	0.493940	12	0.72653	0.23259	chr18:80671672-80671999	gene_body	chr18	80671999	-1.64323	Shared
1.51978e-29	-1.71932	0.38	0.485	4.9066e-25	Nfatc1	Nfatc1	chr18	80684126	80684744	8.2860999999999996E-14	0.597190	33	0.67021	0.07302	chr18:80684126-80684744	-3.19825	gene_body	chr18	80684744	-3.19825	chr18	80684127	80684744	9.8174000000000004E-11	0.528100	32	0.66432	0.13623	chr18:80684127-80684744	gene_body	chr18	80684744	-2.28583	Shared
1.51978e-29	-1.71932	0.38	0.485	4.9066e-25	Nfatc1	Nfatc1	chr18	80697749	80698128	0.0010115	0.443062	36	0.67773	0.34698	chr18:80697749-80698128	-0.965858	gene_body	chr18	80698128	-0.965858	chr18	80631489	80631987	2.4916000000000001E-3	0.488688	20	0.75129	0.26261	chr18:80631489-80631987	gene_body	chr18	80631987	-1.51645	Shared
1.51978e-29	-1.71932	0.38	0.485	4.9066e-25	Nfatc1	Nfatc1	chr18	80697749	80698128	0.0010115	0.443062	36	0.67773	0.34698	chr18:80697749-80698128	-0.965858	gene_body	chr18	80698128	-0.965858	chr18	80654282	80654488	0.032547	0.225269	10	0.89387	0.6686	chr18:80654282-80654488	gene_body	chr18	80654488	-0.418922	Shared
1.51978e-29	-1.71932	0.38	0.485	4.9066e-25	Nfatc1	Nfatc1	chr18	80697749	80698128	0.0010115	0.443062	36	0.67773	0.34698	chr18:80697749-80698128	-0.965858	gene_body	chr18	80698128	-0.965858	chr18	80671672	80671999	6.7085000000000006E-2	0.493940	12	0.72653	0.23259	chr18:80671672-80671999	gene_body	chr18	80671999	-1.64323	Shared
1.51978e-29	-1.71932	0.38	0.485	4.9066e-25	Nfatc1	Nfatc1	chr18	80697749	80698128	0.0010115	0.443062	36	0.67773	0.34698	chr18:80697749-80698128	-0.965858	gene_body	chr18	80698128	-0.965858	chr18	80684127	80684744	9.8174000000000004E-11	0.528100	32	0.66432	0.13623	chr18:80684127-80684744	gene_body	chr18	80684744	-2.28583	Shared
3.75808e-27	-0.878512	0.048	0.117	1.21329e-22	Cd83	Cd83	chr13	43761227	43761531	2.611E-4	0.641426	13	0.65966	0.018238	chr13:43761227-43761531	-5.1767	Distal Intergenic	chr13	43761531	-5.1767	chr13	43750894	43751389	2.1159E-4	0.480739	17	0.7654	0.28466	chr13:43750894-43751389	Distal Intergenic	chr13	43751389	-1.42697	Shared
3.75808e-27	-0.878512	0.048	0.117	1.21329e-22	Cd83	Cd83	chr13	43761227	43761531	2.611E-4	0.641426	13	0.65966	0.018238	chr13:43761227-43761531	-5.1767	Distal Intergenic	chr13	43761531	-5.1767	chr13	43761106	43761592	5.2487000000000002E-3	0.567484	22	0.72757	0.16009	chr13:43761106-43761592	Distal Intergenic	chr13	43761592	-2.1842	Shared
3.75808e-27	-0.878512	0.048	0.117	1.21329e-22	Cd83	Cd83	chr13	43761227	43761531	2.611E-4	0.641426	13	0.65966	0.018238	chr13:43761227-43761531	-5.1767	Distal Intergenic	chr13	43761531	-5.1767	chr13	43768920	43769272	7.1185999999999997E-7	0.635177	16	0.68078	0.045602	chr13:43768920-43769272	Distal Intergenic	chr13	43769272	-3.90002	Shared
3.75808e-27	-0.878512	0.048	0.117	1.21329e-22	Cd83	Cd83	chr13	43761227	43761531	2.611E-4	0.641426	13	0.65966	0.018238	chr13:43761227-43761531	-5.1767	Distal Intergenic	chr13	43761531	-5.1767	chr13	43774231	43774540	0.0049913	0.200150	17	0.21982	0.019673	chr13:43774231-43774540	Distal Intergenic	chr13	43774540	-3.48203	Shared
3.75808e-27	-0.878512	0.048	0.117	1.21329e-22	Cd83	Cd83	chr13	43768920	43769272	3.0745000000000002E-7	0.624552	16	0.68078	0.056227	chr13:43768920-43769272	-3.59785	Distal Intergenic	chr13	43769272	-3.59785	chr13	43750894	43751389	2.1159E-4	0.480739	17	0.7654	0.28466	chr13:43750894-43751389	Distal Intergenic	chr13	43751389	-1.42697	Shared
3.75808e-27	-0.878512	0.048	0.117	1.21329e-22	Cd83	Cd83	chr13	43768920	43769272	3.0745000000000002E-7	0.624552	16	0.68078	0.056227	chr13:43768920-43769272	-3.59785	Distal Intergenic	chr13	43769272	-3.59785	chr13	43761106	43761592	5.2487000000000002E-3	0.567484	22	0.72757	0.16009	chr13:43761106-43761592	Distal Intergenic	chr13	43761592	-2.1842	Shared
3.75808e-27	-0.878512	0.048	0.117	1.21329e-22	Cd83	Cd83	chr13	43768920	43769272	3.0745000000000002E-7	0.624552	16	0.68078	0.056227	chr13:43768920-43769272	-3.59785	Distal Intergenic	chr13	43769272	-3.59785	chr13	43768920	43769272	7.1185999999999997E-7	0.635177	16	0.68078	0.045602	chr13:43768920-43769272	Distal Intergenic	chr13	43769272	-3.90002	Shared
3.75808e-27	-0.878512	0.048	0.117	1.21329e-22	Cd83	Cd83	chr13	43768920	43769272	3.0745000000000002E-7	0.624552	16	0.68078	0.056227	chr13:43768920-43769272	-3.59785	Distal Intergenic	chr13	43769272	-3.59785	chr13	43774231	43774540	0.0049913	0.200150	17	0.21982	0.019673	chr13:43774231-43774540	Distal Intergenic	chr13	43774540	-3.48203	Shared
5.50412e-27	17.1435	0.219	0.119	1.77701e-22	Bach2	Bach2	chr4	32217656	32217884	0.00030006	0.496424	24	0.53008	0.033657	chr4:32217656-32217884	-3.97723	Distal Intergenic	chr4	32217884	-3.97723	chr4	32217656	32217884	0.12878999999999999	0.480827	24	0.53008	0.049254	chr4:32217656-32217884	Distal Intergenic	chr4	32217884	-3.4279	Shared
5.50412e-27	17.1435	0.219	0.119	1.77701e-22	Bach2	Bach2	chr4	32291350	32291815	2.2122000000000001E-3	-0.300830	13	0.021752	0.32258	chr4:32291350-32291815	3.89044	gene_body	chr4	32291815	3.89044	chr4	32217656	32217884	0.12878999999999999	0.480827	24	0.53008	0.049254	chr4:32217656-32217884	Distal Intergenic	chr4	32217884	-3.4279	Shared
2.07161e-26	-0.270148	0.021	0.079	6.68819e-22	Ankrd55	Ankrd55															chr13	112375854	112376108	0.0010557	0.369143	12	0.85251	0.48336	chr13:112375854-112376108	gene_body	chr13	112376108	-0.818619	only TFH
3.67753e-26	-1.01509	0.11	0.19	1.18729e-21	Stim2	Stim2	chr5	54105323	54105992	1.3349E-5	0.599754	22	0.74622	0.14647	chr5:54105323-54105992	-2.349	gene_body	chr5	54105992	-2.349	chr5	54105323	54105992	1.2484E-3	0.440499	22	0.74622	0.30572	chr5:54105323-54105992	gene_body	chr5	54105992	-1.28739	Shared
4.12169e-23	-0.979988	0.132	0.216	1.33069e-18	Fbxw11	Fbxw11	chr11	32715537	32715849	0.00042659	0.327819	12	0.34342	0.0156	chr11:32715537-32715849	-4.46036	gene_body	chr11	32715849	-4.46036	chr11	32714075	32714975	0.0029482	0.466060	20	0.77022	0.30416	chr11:32714075-32714975	gene_body	chr11	32714975	-1.34044	Shared
4.12169e-23	-0.979988	0.132	0.216	1.33069e-18	Fbxw11	Fbxw11	chr11	32715537	32715849	0.00042659	0.327819	12	0.34342	0.0156	chr11:32715537-32715849	-4.46036	gene_body	chr11	32715849	-4.46036	chr11	32715537	32715849	7.9839000000000004E-3	0.339179	12	0.34342	0.0042398	chr11:32715537-32715849	gene_body	chr11	32715849	-6.33983	Shared
5.85227e-22	-1.20617	0.123	0.202	1.8894e-17	Wwox	Wwox															chr8	114977852	114978084	1.6044E-3	0.381955	20	0.76482	0.38286	chr8:114977852-114978084	gene_body	chr8	114978084	-0.998303	only TFH
5.85227e-22	-1.20617	0.123	0.202	1.8894e-17	Wwox	Wwox															chr8	115046069	115046563	0.010665	0.335659	15	0.41511	0.07945	chr8:115046069-115046563	gene_body	chr8	115046563	-2.38537	only TFH
5.85227e-22	-1.20617	0.123	0.202	1.8894e-17	Wwox	Wwox															chr8	115063700	115064100	0.012314	0.415315	10	0.80141	0.3861	chr8:115063700-115064100	gene_body	chr8	115064100	-1.05357	only TFH
5.85227e-22	-1.20617	0.123	0.202	1.8894e-17	Wwox	Wwox															chr8	115064596	115064942	2.5598000000000001E-3	0.301276	26	0.77856	0.47728	chr8:115064596-115064942	gene_body	chr8	115064942	-0.705972	only TFH
5.85227e-22	-1.20617	0.123	0.202	1.8894e-17	Wwox	Wwox															chr8	115071613	115071860	0.00039732	0.271767	16	0.87842	0.60665	chr8:115071613-115071860	gene_body	chr8	115071860	-0.534046	only TFH
1.64891e-21	-0.227586	0.069	0.134	5.32351e-17	Max	Max															chr12	76950525	76950838	0.52895999999999999	0.609100	10	0.71254	0.10344	chr12:76950525-76950838	gene_body	chr12	76950838	-2.78418	only TFH
2.39298e-21	-0.15784	0.026	0.077	7.72573e-17	Myo1d	Myo1d															chr11	80666201	80666781	3.8066999999999999E-12	0.691398	21	0.79201	0.10061	chr11:80666201-80666781	gene_body	chr11	80666781	-2.97674	only TFH
1.01565e-20	-0.321243	0.044	0.099	3.27902e-16	Amd1	Amd1	chr10	40309850	40310670	0.0010611	0.409384	18	0.62995	0.22057	chr10:40309850-40310670	-1.514	Distal Intergenic	chr10	40310670	-1.514	chr10	40309850	40310670	0.027241	0.375918	18	0.62995	0.25403	chr10:40309850-40310670	Distal Intergenic	chr10	40310670	-1.31024	Shared
4.21769e-20	-0.182651	0.004	0.037	1.36168e-15	Cebpa	Cebpa															chr7	35140244	35140655	0.00034114	0.645942	10	0.76186	0.11592	chr7:35140244-35140655	gene_body	chr7	35140655	-2.7164	only TFH
4.74677e-20	-1.49088	0.232	0.32	1.5325e-15	Ptk2b	Ptk2b	chr14	66221075	66221281	0.017728	0.411249	10	0.70047	0.28922	chr14:66221075-66221281	-1.27616	gene_body	chr14	66221281	-1.27616														only TR1
5.31273e-20	-6.59745	0.049	0.115	1.71522e-15	Plagl1	Plagl1	chr10	13056981	13057342	9.221E-2	0.613404	10	0.67776	0.064352	chr10:13056981-13057342	-3.39672	Distal Intergenic	chr10	13057342	-3.39672	chr10	13056981	13057342	0.15695999999999999	0.628614	10	0.67776	0.049141	chr10:13056981-13057342	Distal Intergenic	chr10	13057342	-3.78578	Shared
8.82631e-20	-6.04553	0.852	0.896	2.84957e-15	Btg1	Btg1	chr10	96727018	96727673	2.1007999999999999E-8	0.373000	24	0.39525	0.022252	chr10:96727018-96727673	-4.15076	Distal Intergenic	chr10	96727673	-4.15076	chr10	96587150	96587502	8.8743999999999997E-4	0.429624	20	0.55165	0.12203	chr10:96587150-96587502	gene_body	chr10	96587502	-2.17652	Shared
9.59021e-19	-7.16181	0.407	0.486	3.0962e-14	Nek7	Nek7	chr1	138542732	138543004	0.0010302	0.546707	12	0.83051	0.2838	chr1:138542732-138543004	-1.54912	gene_body	chr1	138543004	-1.54912	chr1	138536168	138536556	4.9277999999999998E-5	0.561943	20	0.8136	0.25165	chr1:138536168-138536556	gene_body	chr1	138536556	-1.6929	Shared
9.59021e-19	-7.16181	0.407	0.486	3.0962e-14	Nek7	Nek7	chr1	138542732	138543004	0.0010302	0.546707	12	0.83051	0.2838	chr1:138542732-138543004	-1.54912	gene_body	chr1	138543004	-1.54912	chr1	138559685	138559920	0.016189	0.351098	10	0.35682	0.0057265	chr1:138559685-138559920	gene_body	chr1	138559920	-5.9614	Shared
9.59021e-19	-7.16181	0.407	0.486	3.0962e-14	Nek7	Nek7	chr1	138542732	138543004	0.0010302	0.546707	12	0.83051	0.2838	chr1:138542732-138543004	-1.54912	gene_body	chr1	138543004	-1.54912	chr1	138560181	138561454	4.7588E-36	0.682319	54	0.74027	0.05795	chr1:138560181-138561454	gene_body	chr1	138561454	-3.67517	Shared
9.59021e-19	-7.16181	0.407	0.486	3.0962e-14	Nek7	Nek7	chr1	138542732	138543004	0.0010302	0.546707	12	0.83051	0.2838	chr1:138542732-138543004	-1.54912	gene_body	chr1	138543004	-1.54912	chr1	138609210	138609686	1.2504000000000001E-4	0.296208	32	0.73782	0.44161	chr1:138609210-138609686	gene_body	chr1	138609686	-0.740496	Shared
9.59021e-19	-7.16181	0.407	0.486	3.0962e-14	Nek7	Nek7	chr1	138559370	138559646	3.2583000000000001E-2	0.666275	10	0.76451	0.098238	chr1:138559370-138559646	-2.96018	gene_body	chr1	138559646	-2.96018	chr1	138536168	138536556	4.9277999999999998E-5	0.561943	20	0.8136	0.25165	chr1:138536168-138536556	gene_body	chr1	138536556	-1.6929	Shared
9.59021e-19	-7.16181	0.407	0.486	3.0962e-14	Nek7	Nek7	chr1	138559370	138559646	3.2583000000000001E-2	0.666275	10	0.76451	0.098238	chr1:138559370-138559646	-2.96018	gene_body	chr1	138559646	-2.96018	chr1	138559685	138559920	0.016189	0.351098	10	0.35682	0.0057265	chr1:138559685-138559920	gene_body	chr1	138559920	-5.9614	Shared
9.59021e-19	-7.16181	0.407	0.486	3.0962e-14	Nek7	Nek7	chr1	138559370	138559646	3.2583000000000001E-2	0.666275	10	0.76451	0.098238	chr1:138559370-138559646	-2.96018	gene_body	chr1	138559646	-2.96018	chr1	138560181	138561454	4.7588E-36	0.682319	54	0.74027	0.05795	chr1:138560181-138561454	gene_body	chr1	138561454	-3.67517	Shared
9.59021e-19	-7.16181	0.407	0.486	3.0962e-14	Nek7	Nek7	chr1	138559370	138559646	3.2583000000000001E-2	0.666275	10	0.76451	0.098238	chr1:138559370-138559646	-2.96018	gene_body	chr1	138559646	-2.96018	chr1	138609210	138609686	1.2504000000000001E-4	0.296208	32	0.73782	0.44161	chr1:138609210-138609686	gene_body	chr1	138609686	-0.740496	Shared
9.59021e-19	-7.16181	0.407	0.486	3.0962e-14	Nek7	Nek7	chr1	138559685	138559920	0.0016001	0.342539	10	0.35682	0.014286	chr1:138559685-138559920	-4.64252	gene_body	chr1	138559920	-4.64252	chr1	138536168	138536556	4.9277999999999998E-5	0.561943	20	0.8136	0.25165	chr1:138536168-138536556	gene_body	chr1	138536556	-1.6929	Shared
9.59021e-19	-7.16181	0.407	0.486	3.0962e-14	Nek7	Nek7	chr1	138559685	138559920	0.0016001	0.342539	10	0.35682	0.014286	chr1:138559685-138559920	-4.64252	gene_body	chr1	138559920	-4.64252	chr1	138559685	138559920	0.016189	0.351098	10	0.35682	0.0057265	chr1:138559685-138559920	gene_body	chr1	138559920	-5.9614	Shared
9.59021e-19	-7.16181	0.407	0.486	3.0962e-14	Nek7	Nek7	chr1	138559685	138559920	0.0016001	0.342539	10	0.35682	0.014286	chr1:138559685-138559920	-4.64252	gene_body	chr1	138559920	-4.64252	chr1	138560181	138561454	4.7588E-36	0.682319	54	0.74027	0.05795	chr1:138560181-138561454	gene_body	chr1	138561454	-3.67517	Shared
9.59021e-19	-7.16181	0.407	0.486	3.0962e-14	Nek7	Nek7	chr1	138559685	138559920	0.0016001	0.342539	10	0.35682	0.014286	chr1:138559685-138559920	-4.64252	gene_body	chr1	138559920	-4.64252	chr1	138609210	138609686	1.2504000000000001E-4	0.296208	32	0.73782	0.44161	chr1:138609210-138609686	gene_body	chr1	138609686	-0.740496	Shared
9.59021e-19	-7.16181	0.407	0.486	3.0962e-14	Nek7	Nek7	chr1	138560182	138561454	2.9207999999999999E-37	0.690778	53	0.74519	0.054412	chr1:138560182-138561454	-3.77561	gene_body	chr1	138561454	-3.77561	chr1	138536168	138536556	4.9277999999999998E-5	0.561943	20	0.8136	0.25165	chr1:138536168-138536556	gene_body	chr1	138536556	-1.6929	Shared
9.59021e-19	-7.16181	0.407	0.486	3.0962e-14	Nek7	Nek7	chr1	138560182	138561454	2.9207999999999999E-37	0.690778	53	0.74519	0.054412	chr1:138560182-138561454	-3.77561	gene_body	chr1	138561454	-3.77561	chr1	138559685	138559920	0.016189	0.351098	10	0.35682	0.0057265	chr1:138559685-138559920	gene_body	chr1	138559920	-5.9614	Shared
9.59021e-19	-7.16181	0.407	0.486	3.0962e-14	Nek7	Nek7	chr1	138560182	138561454	2.9207999999999999E-37	0.690778	53	0.74519	0.054412	chr1:138560182-138561454	-3.77561	gene_body	chr1	138561454	-3.77561	chr1	138560181	138561454	4.7588E-36	0.682319	54	0.74027	0.05795	chr1:138560181-138561454	gene_body	chr1	138561454	-3.67517	Shared
9.59021e-19	-7.16181	0.407	0.486	3.0962e-14	Nek7	Nek7	chr1	138560182	138561454	2.9207999999999999E-37	0.690778	53	0.74519	0.054412	chr1:138560182-138561454	-3.77561	gene_body	chr1	138561454	-3.77561	chr1	138609210	138609686	1.2504000000000001E-4	0.296208	32	0.73782	0.44161	chr1:138609210-138609686	gene_body	chr1	138609686	-0.740496	Shared
9.59021e-19	-7.16181	0.407	0.486	3.0962e-14	Nek7	Nek7	chr1	138592722	138593489	4.0553000000000003E-17	0.633124	32	0.84922	0.2161	chr1:138592722-138593489	-1.97444	gene_body	chr1	138593489	-1.97444	chr1	138536168	138536556	4.9277999999999998E-5	0.561943	20	0.8136	0.25165	chr1:138536168-138536556	gene_body	chr1	138536556	-1.6929	Shared
9.59021e-19	-7.16181	0.407	0.486	3.0962e-14	Nek7	Nek7	chr1	138592722	138593489	4.0553000000000003E-17	0.633124	32	0.84922	0.2161	chr1:138592722-138593489	-1.97444	gene_body	chr1	138593489	-1.97444	chr1	138559685	138559920	0.016189	0.351098	10	0.35682	0.0057265	chr1:138559685-138559920	gene_body	chr1	138559920	-5.9614	Shared
9.59021e-19	-7.16181	0.407	0.486	3.0962e-14	Nek7	Nek7	chr1	138592722	138593489	4.0553000000000003E-17	0.633124	32	0.84922	0.2161	chr1:138592722-138593489	-1.97444	gene_body	chr1	138593489	-1.97444	chr1	138560181	138561454	4.7588E-36	0.682319	54	0.74027	0.05795	chr1:138560181-138561454	gene_body	chr1	138561454	-3.67517	Shared
9.59021e-19	-7.16181	0.407	0.486	3.0962e-14	Nek7	Nek7	chr1	138592722	138593489	4.0553000000000003E-17	0.633124	32	0.84922	0.2161	chr1:138592722-138593489	-1.97444	gene_body	chr1	138593489	-1.97444	chr1	138609210	138609686	1.2504000000000001E-4	0.296208	32	0.73782	0.44161	chr1:138609210-138609686	gene_body	chr1	138609686	-0.740496	Shared
9.59021e-19	-7.16181	0.407	0.486	3.0962e-14	Nek7	Nek7	chr1	138609253	138609734	2.3906999999999998E-7	0.576529	29	0.70234	0.12581	chr1:138609253-138609734	-2.48092	gene_body	chr1	138609734	-2.48092	chr1	138536168	138536556	4.9277999999999998E-5	0.561943	20	0.8136	0.25165	chr1:138536168-138536556	gene_body	chr1	138536556	-1.6929	Shared
9.59021e-19	-7.16181	0.407	0.486	3.0962e-14	Nek7	Nek7	chr1	138609253	138609734	2.3906999999999998E-7	0.576529	29	0.70234	0.12581	chr1:138609253-138609734	-2.48092	gene_body	chr1	138609734	-2.48092	chr1	138559685	138559920	0.016189	0.351098	10	0.35682	0.0057265	chr1:138559685-138559920	gene_body	chr1	138559920	-5.9614	Shared
9.59021e-19	-7.16181	0.407	0.486	3.0962e-14	Nek7	Nek7	chr1	138609253	138609734	2.3906999999999998E-7	0.576529	29	0.70234	0.12581	chr1:138609253-138609734	-2.48092	gene_body	chr1	138609734	-2.48092	chr1	138560181	138561454	4.7588E-36	0.682319	54	0.74027	0.05795	chr1:138560181-138561454	gene_body	chr1	138561454	-3.67517	Shared
9.59021e-19	-7.16181	0.407	0.486	3.0962e-14	Nek7	Nek7	chr1	138609253	138609734	2.3906999999999998E-7	0.576529	29	0.70234	0.12581	chr1:138609253-138609734	-2.48092	gene_body	chr1	138609734	-2.48092	chr1	138609210	138609686	1.2504000000000001E-4	0.296208	32	0.73782	0.44161	chr1:138609210-138609686	gene_body	chr1	138609686	-0.740496	Shared
1.19654e-18	0.239686	0.056	0.015	3.86304e-14	Myo3b	Myo3b	chr2	70105628	70106542	2.4796E-7	0.522476	27	0.72619	0.20372	chr2:70105628-70106542	-1.83376	gene_body	chr2	70106542	-1.83376	chr2	70105539	70106542	2.4644999999999998E-12	0.513787	30	0.73436	0.22057	chr2:70105539-70106542	gene_body	chr2	70106542	-1.73525	Shared
1.19654e-18	0.239686	0.056	0.015	3.86304e-14	Myo3b	Myo3b	chr2	70105628	70106542	2.4796E-7	0.522476	27	0.72619	0.20372	chr2:70105628-70106542	-1.83376	gene_body	chr2	70106542	-1.83376	chr2	70118450	70119236	0.56537000000000004	0.320561	32	0.49936	0.1788	chr2:70118450-70119236	gene_body	chr2	70119236	-1.48173	Shared
3.42781e-18	-0.409532	0.077	0.139	1.10667e-13	Cdk6	Cdk6															chr5	3382392	3382972	1.4542000000000001E-5	0.406798	22	0.44754	0.040738	chr5:3382392-3382972	gene_body	chr5	3382972	-3.45757	only TFH
4.02476e-18	-0.183113	0.014	0.049	1.29939e-13	Ankrd6	Ankrd6															chr4	32888502	32889880	0.019856	-0.296659	51	0.3633	0.63095	chr4:32888502-32889880	gene_body	chr4	32889880	0.796364	only TFH
4.02476e-18	-0.183113	0.014	0.049	1.29939e-13	Ankrd6	Ankrd6															chr4	32928598	32928979	0.75882000000000005	0.259313	28	0.55245	0.29314	chr4:32928598-32928979	gene_body	chr4	32928979	-0.914254	only TFH
5.5964e-18	1.09272	0.294	0.206	1.8068e-13	Ttc39b	Ttc39b															chr4	83273347	83273726	0.36476999999999998	-0.328258	28	0.15845	0.4867	chr4:83273347-83273726	gene_body	chr4	83273726	1.61901	only TFH
5.84446e-18	-0.240242	0.019	0.06	1.88688e-13	Alpk2	Alpk2	chr18	65327027	65327348	0.00077775	0.581940	10	0.72302	0.14108	chr18:65327027-65327348	-2.35752	gene_body	chr18	65327348	-2.35752	chr18	65327026	65327347	0.0077054	0.527162	10	0.73891	0.21174	chr18:65327026-65327347	gene_body	chr18	65327347	-1.8031	Shared
6.69535e-18	-6.83146	0.388	0.462	2.16159e-13	Eea1	Eea1	chr10	95914403	95914740	4.121E-5	0.747991	12	0.7719	0.023909	chr10:95914403-95914740	-5.01279	Distal Intergenic	chr10	95914740	-5.01279	chr10	95914403	95914740	4.2378000000000001E-4	0.710165	12	0.7719	0.061736	chr10:95914403-95914740	Distal Intergenic	chr10	95914740	-3.64423	Shared
6.69535e-18	-6.83146	0.388	0.462	2.16159e-13	Eea1	Eea1	chr10	95942533	95942916	0.0050322	0.596761	10	0.7402	0.14344	chr10:95942533-95942916	-2.36747	gene_body	chr10	95942916	-2.36747	chr10	95914403	95914740	4.2378000000000001E-4	0.710165	12	0.7719	0.061736	chr10:95914403-95914740	Distal Intergenic	chr10	95914740	-3.64423	Shared
5.71637e-17	-1.22524	0.114	0.18	1.84553e-12	Itpr1	Itpr1															chr6	108337468	108337674	0.0022399	0.500283	10	0.68471	0.18443	chr6:108337468-108337674	gene_body	chr6	108337674	-1.89242	only TFH
5.71637e-17	-1.22524	0.114	0.18	1.84553e-12	Itpr1	Itpr1															chr6	108338138	108338877	6.4870999999999997E-13	0.512554	22	0.82946	0.31691	chr6:108338138-108338877	gene_body	chr6	108338877	-1.3881	only TFH
2.44324e-16	-7.55579	0.273	0.344	7.888e-12	Rab8b	Rab8b															chr9	66877930	66878197	0.43801000000000001	0.284170	14	0.91086	0.62669	chr9:66877930-66878197	gene_body	chr9	66878197	-0.539477	only TFH
5.30981e-16	-0.401142	0.181	0.254	1.71427e-11	Ptpn11	Ptpn11	chr5	121178951	121180118	4.2056E-14	0.766206	30	0.78294	0.01673	chr5:121178951-121180118	-5.54839	gene_body	chr5	121180118	-5.54839	chr5	121174239	121174844	1.5708E-7	0.691599	21	0.74338	0.051779	chr5:121174239-121174844	gene_body	chr5	121174844	-3.84366	Shared
5.30981e-16	-0.401142	0.181	0.254	1.71427e-11	Ptpn11	Ptpn11	chr5	121178951	121180118	4.2056E-14	0.766206	30	0.78294	0.01673	chr5:121178951-121180118	-5.54839	gene_body	chr5	121180118	-5.54839	chr5	121178951	121180118	7.4555000000000004E-14	0.648723	30	0.78294	0.13421	chr5:121178951-121180118	gene_body	chr5	121180118	-2.54441	Shared
5.30981e-16	-0.401142	0.181	0.254	1.71427e-11	Ptpn11	Ptpn11	chr5	121178951	121180118	4.2056E-14	0.766206	30	0.78294	0.01673	chr5:121178951-121180118	-5.54839	gene_body	chr5	121180118	-5.54839	chr5	121183121	121184017	4.8957999999999996E-16	0.549565	39	0.79609	0.24653	chr5:121183121-121184017	gene_body	chr5	121184017	-1.69117	Shared
5.30981e-16	-0.401142	0.181	0.254	1.71427e-11	Ptpn11	Ptpn11	chr5	121178951	121180118	4.2056E-14	0.766206	30	0.78294	0.01673	chr5:121178951-121180118	-5.54839	gene_body	chr5	121180118	-5.54839	chr5	121188740	121189564	8.3085999999999996E-13	0.473792	29	0.86581	0.39202	chr5:121188740-121189564	gene_body	chr5	121189564	-1.14312	Shared
5.30981e-16	-0.401142	0.181	0.254	1.71427e-11	Ptpn11	Ptpn11	chr5	121189004	121190317	3.6998000000000003E-35	0.813617	53	0.85777	0.044151	chr5:121189004-121190317	-4.28007	gene_body	chr5	121190317	-4.28007	chr5	121174239	121174844	1.5708E-7	0.691599	21	0.74338	0.051779	chr5:121174239-121174844	gene_body	chr5	121174844	-3.84366	Shared
5.30981e-16	-0.401142	0.181	0.254	1.71427e-11	Ptpn11	Ptpn11	chr5	121189004	121190317	3.6998000000000003E-35	0.813617	53	0.85777	0.044151	chr5:121189004-121190317	-4.28007	gene_body	chr5	121190317	-4.28007	chr5	121178951	121180118	7.4555000000000004E-14	0.648723	30	0.78294	0.13421	chr5:121178951-121180118	gene_body	chr5	121180118	-2.54441	Shared
5.30981e-16	-0.401142	0.181	0.254	1.71427e-11	Ptpn11	Ptpn11	chr5	121189004	121190317	3.6998000000000003E-35	0.813617	53	0.85777	0.044151	chr5:121189004-121190317	-4.28007	gene_body	chr5	121190317	-4.28007	chr5	121183121	121184017	4.8957999999999996E-16	0.549565	39	0.79609	0.24653	chr5:121183121-121184017	gene_body	chr5	121184017	-1.69117	Shared
5.30981e-16	-0.401142	0.181	0.254	1.71427e-11	Ptpn11	Ptpn11	chr5	121189004	121190317	3.6998000000000003E-35	0.813617	53	0.85777	0.044151	chr5:121189004-121190317	-4.28007	gene_body	chr5	121190317	-4.28007	chr5	121188740	121189564	8.3085999999999996E-13	0.473792	29	0.86581	0.39202	chr5:121188740-121189564	gene_body	chr5	121189564	-1.14312	Shared
5.30981e-16	-0.401142	0.181	0.254	1.71427e-11	Ptpn11	Ptpn11	chr5	121172922	121173819	2.1394E-7	0.657351	22	0.7328	0.07545	chr5:121172922-121173819	-3.27983	gene_body	chr5	121173819	-3.27983	chr5	121174239	121174844	1.5708E-7	0.691599	21	0.74338	0.051779	chr5:121174239-121174844	gene_body	chr5	121174844	-3.84366	Shared
5.30981e-16	-0.401142	0.181	0.254	1.71427e-11	Ptpn11	Ptpn11	chr5	121172922	121173819	2.1394E-7	0.657351	22	0.7328	0.07545	chr5:121172922-121173819	-3.27983	gene_body	chr5	121173819	-3.27983	chr5	121178951	121180118	7.4555000000000004E-14	0.648723	30	0.78294	0.13421	chr5:121178951-121180118	gene_body	chr5	121180118	-2.54441	Shared
5.30981e-16	-0.401142	0.181	0.254	1.71427e-11	Ptpn11	Ptpn11	chr5	121172922	121173819	2.1394E-7	0.657351	22	0.7328	0.07545	chr5:121172922-121173819	-3.27983	gene_body	chr5	121173819	-3.27983	chr5	121183121	121184017	4.8957999999999996E-16	0.549565	39	0.79609	0.24653	chr5:121183121-121184017	gene_body	chr5	121184017	-1.69117	Shared
5.30981e-16	-0.401142	0.181	0.254	1.71427e-11	Ptpn11	Ptpn11	chr5	121172922	121173819	2.1394E-7	0.657351	22	0.7328	0.07545	chr5:121172922-121173819	-3.27983	gene_body	chr5	121173819	-3.27983	chr5	121188740	121189564	8.3085999999999996E-13	0.473792	29	0.86581	0.39202	chr5:121188740-121189564	gene_body	chr5	121189564	-1.14312	Shared
1.56161e-15	-0.449996	0.009	0.041	5.04165e-11	Cpm	Cpm															chr10	117647181	117647549	2.9894999999999997E-17	0.608622	29	0.85669	0.24807	chr10:117647181-117647549	gene_body	chr10	117647549	-1.78803	only TFH
1.56161e-15	-0.449996	0.009	0.041	5.04165e-11	Cpm	Cpm															chr10	117647560	117647783	0.010914	0.277827	10	0.92804	0.65021	chr10:117647560-117647783	gene_body	chr10	117647783	-0.513281	only TFH
1.04778e-14	1.5571	0.954	0.963	3.38274e-10	Inpp4b	Inpp4b	chr8	81343396	81344614	0.00056683	0.432002	17	0.44338	0.011373	chr8:81343396-81344614	-5.28486	gene_body	chr8	81344614	-5.28486	chr8	81861454	81861895	2.9782999999999999E-12	0.637228	26	0.77473	0.1375	chr8:81861454-81861895	gene_body	chr8	81861895	-2.49426	Shared
1.04778e-14	1.5571	0.954	0.963	3.38274e-10	Inpp4b	Inpp4b	chr8	81861454	81861895	3.1074999999999998E-12	0.711631	26	0.77473	0.0631	chr8:81861454-81861895	-3.61798	gene_body	chr8	81861895	-3.61798	chr8	81861454	81861895	2.9782999999999999E-12	0.637228	26	0.77473	0.1375	chr8:81861454-81861895	gene_body	chr8	81861895	-2.49426	Shared
1.37677e-14	-0.137555	0.034	0.075	4.4449e-10	Ttc39c	Ttc39c															chr18	12640433	12641231	0.88456999999999997	0.419907	18	0.77847	0.35856	chr18:12640433-12641231	gene_body	chr18	12641231	-1.11843	only TFH
4.7377e-14	-0.473665	0.007	0.037	1.52957e-09	Ptpn5	Ptpn5	chr7	47108114	47109068	1.2229999999999999E-21	0.522718	45	0.77882	0.2561	chr7:47108114-47109068	-1.60458	gene_body	chr7	47109068	-1.60458	chr7	47111425	47112069	5.0873999999999996E-19	0.612411	32	0.76654	0.15413	chr7:47111425-47112069	gene_body	chr7	47112069	-2.31421	Shared
4.7377e-14	-0.473665	0.007	0.037	1.52957e-09	Ptpn5	Ptpn5	chr7	47108114	47109068	1.2229999999999999E-21	0.522718	45	0.77882	0.2561	chr7:47108114-47109068	-1.60458	gene_body	chr7	47109068	-1.60458	chr7	47108029	47109247	1.5375999999999999E-22	0.535726	48	0.76965	0.23393	chr7:47108029-47109247	gene_body	chr7	47109247	-1.71813	Shared
4.7377e-14	-0.473665	0.007	0.037	1.52957e-09	Ptpn5	Ptpn5	chr7	47111425	47112069	3.6389999999999997E-18	0.587038	32	0.76654	0.1795	chr7:47111425-47112069	-2.09438	gene_body	chr7	47112069	-2.09438	chr7	47111425	47112069	5.0873999999999996E-19	0.612411	32	0.76654	0.15413	chr7:47111425-47112069	gene_body	chr7	47112069	-2.31421	Shared
4.7377e-14	-0.473665	0.007	0.037	1.52957e-09	Ptpn5	Ptpn5	chr7	47111425	47112069	3.6389999999999997E-18	0.587038	32	0.76654	0.1795	chr7:47111425-47112069	-2.09438	gene_body	chr7	47112069	-2.09438	chr7	47108029	47109247	1.5375999999999999E-22	0.535726	48	0.76965	0.23393	chr7:47108029-47109247	gene_body	chr7	47109247	-1.71813	Shared
1.12982e-13	-0.138703	0.047	0.09	3.64762e-09	Pear1	Pear1	chr3	87832027	87832490	0.00026223	0.497048	10	0.54275	0.045702	chr3:87832027-87832490	-3.56996	Distal Intergenic	chr3	87832490	-3.56996														only TR1
2.81717e-13	-0.735974	0.185	0.249	9.09524e-09	Slc22a15	Slc22a15	chr3	101948681	101949025	0.0025899	0.427275	10	0.72907	0.3018	chr3:101948681-101949025	-1.27246	Distal Intergenic	chr3	101949025	-1.27246	chr3	101948681	101949200	4.1971999999999999E-3	0.593360	13	0.7489	0.15554	chr3:101948681-101949200	Distal Intergenic	chr3	101949200	-2.26749	Shared
5.19161e-13	-0.788108	0.068	0.114	1.67611e-08	Ipmk	Ipmk	chr10	71363303	71364107	2.7454E-18	0.478974	39	0.83521	0.35623	chr10:71363303-71364107	-1.22933	gene_body	chr10	71364107	-1.22933	chr10	71363429	71364050	4.8107999999999998E-11	0.703019	26	0.83236	0.12934	chr10:71363429-71364050	gene_body	chr10	71364050	-2.68604	Shared
5.52843e-13	-0.219774	0.015	0.047	1.78485e-08	Trpm6	Trpm6	chr19	18745947	18746849	1.7585000000000002E-8	0.512446	32	0.64183	0.12938	chr19:18745947-18746849	-2.31058	Distal Intergenic	chr19	18746849	-2.31058	chr19	18745947	18746849	3.2343E-8	0.498895	32	0.64183	0.14293	chr19:18745947-18746849	Distal Intergenic	chr19	18746849	-2.16688	Shared
5.52843e-13	-0.219774	0.015	0.047	1.78485e-08	Trpm6	Trpm6	chr19	18745947	18746849	1.7585000000000002E-8	0.512446	32	0.64183	0.12938	chr19:18745947-18746849	-2.31058	Distal Intergenic	chr19	18746849	-2.31058	chr19	18747207	18747606	0.00058305	0.385275	10	0.43346	0.048189	chr19:18747207-18747606	Distal Intergenic	chr19	18747606	-3.16912	Shared
5.52843e-13	-0.219774	0.015	0.047	1.78485e-08	Trpm6	Trpm6	chr19	18745947	18746849	1.7585000000000002E-8	0.512446	32	0.64183	0.12938	chr19:18745947-18746849	-2.31058	Distal Intergenic	chr19	18746849	-2.31058	chr19	18766520	18766825	1.1954000000000001E-3	0.581030	12	0.68413	0.1031	chr19:18766520-18766825	gene_body	chr19	18766825	-2.73023	Shared
5.52843e-13	-0.219774	0.015	0.047	1.78485e-08	Trpm6	Trpm6	chr19	18747207	18747606	0.00027062	0.406515	10	0.43346	0.026948	chr19:18747207-18747606	-4.00765	Distal Intergenic	chr19	18747606	-4.00765	chr19	18745947	18746849	3.2343E-8	0.498895	32	0.64183	0.14293	chr19:18745947-18746849	Distal Intergenic	chr19	18746849	-2.16688	Shared
5.52843e-13	-0.219774	0.015	0.047	1.78485e-08	Trpm6	Trpm6	chr19	18747207	18747606	0.00027062	0.406515	10	0.43346	0.026948	chr19:18747207-18747606	-4.00765	Distal Intergenic	chr19	18747606	-4.00765	chr19	18747207	18747606	0.00058305	0.385275	10	0.43346	0.048189	chr19:18747207-18747606	Distal Intergenic	chr19	18747606	-3.16912	Shared
5.52843e-13	-0.219774	0.015	0.047	1.78485e-08	Trpm6	Trpm6	chr19	18747207	18747606	0.00027062	0.406515	10	0.43346	0.026948	chr19:18747207-18747606	-4.00765	Distal Intergenic	chr19	18747606	-4.00765	chr19	18766520	18766825	1.1954000000000001E-3	0.581030	12	0.68413	0.1031	chr19:18766520-18766825	gene_body	chr19	18766825	-2.73023	Shared
9.8918e-13	-1.97622	0.08	0.127	3.19357e-08	Il21	Il21	chr3	37259411	37259635	0.0001175	0.527478	10	0.5349	0.0074206	chr3:37259411-37259635	-6.17159	Distal Intergenic	chr3	37259635	-6.17159	chr3	37259411	37259635	0.22323000000000001	0.509042	10	0.5349	0.025857	chr3:37259411-37259635	Distal Intergenic	chr3	37259635	-4.37064	Shared
9.8918e-13	-1.97622	0.08	0.127	3.19357e-08	Il21	Il21	chr3	37259411	37259635	0.0001175	0.527478	10	0.5349	0.0074206	chr3:37259411-37259635	-6.17159	Distal Intergenic	chr3	37259635	-6.17159	chr3	37268113	37268573	2.7384999999999998E-7	0.389393	19	0.44601	0.056617	chr3:37268113-37268573	Distal Intergenic	chr3	37268573	-2.97777	Shared
9.8918e-13	-1.97622	0.08	0.127	3.19357e-08	Il21	Il21	chr3	37268244	37268572	3.4989000000000001E-3	0.438039	16	0.45263	0.014594	chr3:37268244-37268572	-4.95488	Distal Intergenic	chr3	37268572	-4.95488	chr3	37259411	37259635	0.22323000000000001	0.509042	10	0.5349	0.025857	chr3:37259411-37259635	Distal Intergenic	chr3	37259635	-4.37064	Shared
9.8918e-13	-1.97622	0.08	0.127	3.19357e-08	Il21	Il21	chr3	37268244	37268572	3.4989000000000001E-3	0.438039	16	0.45263	0.014594	chr3:37268244-37268572	-4.95488	Distal Intergenic	chr3	37268572	-4.95488	chr3	37268113	37268573	2.7384999999999998E-7	0.389393	19	0.44601	0.056617	chr3:37268113-37268573	Distal Intergenic	chr3	37268573	-2.97777	Shared
1.51224e-12	-0.309763	0.052	0.096	4.88226e-08	Rnf157	Rnf157	chr11	116405797	116406899	1.2321000000000001E-22	0.248937	58	0.28637	0.037435	chr11:116405797-116406899	-2.93542	gene_body	chr11	116406899	-2.93542	chr11	116405797	116406899	5.6352999999999997E-21	0.238462	58	0.28637	0.047911	chr11:116405797-116406899	gene_body	chr11	116406899	-2.57945	Shared
2.72814e-12	0.0579856	0.032	0.009	8.80781e-08	Chst2	Chst2	chr9	95151538	95152148	0.011637	0.495548	13	0.65649	0.16094	chr9:95151538-95152148	-2.02825	gene_body	chr9	95152148	-2.02825	chr9	95278173	95279268	6.5563999999999996E-6	0.352041	28	0.69972	0.34768	chr9:95278173-95279268	Distal Intergenic	chr9	95279268	-1.00902	Shared
2.72814e-12	0.0579856	0.032	0.009	8.80781e-08	Chst2	Chst2	chr9	95151538	95152148	0.011637	0.495548	13	0.65649	0.16094	chr9:95151538-95152148	-2.02825	gene_body	chr9	95152148	-2.02825	chr9	95329136	95329427	0.008054	0.423769	16	0.53056	0.10679	chr9:95329136-95329427	Distal Intergenic	chr9	95329427	-2.31274	Shared
2.72814e-12	0.0579856	0.032	0.009	8.80781e-08	Chst2	Chst2	chr9	95277878	95279483	1.573E-14	0.580921	32	0.71159	0.13067	chr9:95277878-95279483	-2.44512	Distal Intergenic	chr9	95279483	-2.44512	chr9	95278173	95279268	6.5563999999999996E-6	0.352041	28	0.69972	0.34768	chr9:95278173-95279268	Distal Intergenic	chr9	95279268	-1.00902	Shared
2.72814e-12	0.0579856	0.032	0.009	8.80781e-08	Chst2	Chst2	chr9	95277878	95279483	1.573E-14	0.580921	32	0.71159	0.13067	chr9:95277878-95279483	-2.44512	Distal Intergenic	chr9	95279483	-2.44512	chr9	95329136	95329427	0.008054	0.423769	16	0.53056	0.10679	chr9:95329136-95329427	Distal Intergenic	chr9	95329427	-2.31274	Shared
8.81028e-12	-0.259728	0.146	0.205	2.8444e-07	Tspan14	Tspan14	chr14	40938243	40938966	2.8159000000000001E-11	0.640650	24	0.70133	0.060683	chr14:40938243-40938966	-3.53073	gene_body	chr14	40938966	-3.53073	chr14	40938243	40938966	1.1399E-7	0.559741	24	0.70133	0.14159	chr14:40938243-40938966	gene_body	chr14	40938966	-2.30837	Shared
1.42866e-11	0.175484	0.074	0.036	4.61242e-07	Tbx21	Tbx21	chr11	97112838	97114030	3.3677999999999999E-21	0.662399	41	0.78271	0.12031	chr11:97112838-97114030	-2.70172	gene_body	chr11	97114030	-2.70172														only TR1
2.31059e-11	0.912841	0.424	0.512	7.45975e-07	Jak2	Jak2	chr19	29271142	29271556	2.5279999999999999E-16	0.599104	26	0.65152	0.052419	chr19:29271142-29271556	-3.63565	gene_body	chr19	29271556	-3.63565	chr19	29271142	29271556	5.9937000000000004E-17	0.594563	26	0.65152	0.05696	chr19:29271142-29271556	gene_body	chr19	29271556	-3.51579	Shared
1.80117e-10	-0.0988121	0.019	0.046	5.81509e-06	Fam43a	Fam43a	chr16	30678918	30679443	1.1756000000000001E-5	0.626739	15	0.6873	0.060559	chr16:30678918-30679443	-3.50453	Distal Intergenic	chr16	30679443	-3.50453	chr16	30678918	30679443	1.0562E-5	0.638967	15	0.6873	0.048331	chr16:30678918-30679443	Distal Intergenic	chr16	30679443	-3.82992	Shared
1.80117e-10	-0.0988121	0.019	0.046	5.81509e-06	Fam43a	Fam43a	chr16	30678918	30679443	1.1756000000000001E-5	0.626739	15	0.6873	0.060559	chr16:30678918-30679443	-3.50453	Distal Intergenic	chr16	30679443	-3.50453	chr16	30720833	30721207	1.8350000000000002E-2	0.596173	12	0.74679	0.15062	chr16:30720833-30721207	Distal Intergenic	chr16	30721207	-2.30979	Shared
1.80117e-10	-0.0988121	0.019	0.046	5.81509e-06	Fam43a	Fam43a	chr16	30771777	30771994	0.00016625	0.520949	10	0.76572	0.24477	chr16:30771777-30771994	-1.64539	Distal Intergenic	chr16	30771994	-1.64539	chr16	30678918	30679443	1.0562E-5	0.638967	15	0.6873	0.048331	chr16:30678918-30679443	Distal Intergenic	chr16	30679443	-3.82992	Shared
1.80117e-10	-0.0988121	0.019	0.046	5.81509e-06	Fam43a	Fam43a	chr16	30771777	30771994	0.00016625	0.520949	10	0.76572	0.24477	chr16:30771777-30771994	-1.64539	Distal Intergenic	chr16	30771994	-1.64539	chr16	30720833	30721207	1.8350000000000002E-2	0.596173	12	0.74679	0.15062	chr16:30720833-30721207	Distal Intergenic	chr16	30721207	-2.30979	Shared
1.02896e-09	-0.154208	0.047	0.081	3.32198e-05	Slc36a3	Slc36a3	chr11	55131026	55131664	0.0017074	0.329286	20	0.38622	0.056934	chr11:55131026-55131664	-2.76206	gene_body	chr11	55131664	-2.76206														only TR1
1.74323e-09	-2.95783	0.175	0.117	5.62801e-05	Farp1	Farp1	chr14	121101700	121102891	1.2853E-15	0.609846	34	0.76511	0.15526	chr14:121101700-121102891	-2.30098	gene_body	chr14	121102891	-2.30098	chr14	121101700	121102891	5.9663000000000001E-4	0.409425	34	0.76511	0.35568	chr14:121101700-121102891	gene_body	chr14	121102891	-1.10509	Shared
1.74323e-09	-2.95783	0.175	0.117	5.62801e-05	Farp1	Farp1	chr14	121101700	121102891	1.2853E-15	0.609846	34	0.76511	0.15526	chr14:121101700-121102891	-2.30098	gene_body	chr14	121102891	-2.30098	chr14	121107621	121107839	0.017683	0.275677	13	0.39951	0.12383	chr14:121107621-121107839	gene_body	chr14	121107839	-1.68987	Shared
1.74323e-09	-2.95783	0.175	0.117	5.62801e-05	Farp1	Farp1	chr14	121107620	121107825	0.020762	0.394875	10	0.44762	0.052743	chr14:121107620-121107825	-3.08522	gene_body	chr14	121107825	-3.08522	chr14	121101700	121102891	5.9663000000000001E-4	0.409425	34	0.76511	0.35568	chr14:121101700-121102891	gene_body	chr14	121102891	-1.10509	Shared
1.74323e-09	-2.95783	0.175	0.117	5.62801e-05	Farp1	Farp1	chr14	121107620	121107825	0.020762	0.394875	10	0.44762	0.052743	chr14:121107620-121107825	-3.08522	gene_body	chr14	121107825	-3.08522	chr14	121107621	121107839	0.017683	0.275677	13	0.39951	0.12383	chr14:121107621-121107839	gene_body	chr14	121107839	-1.68987	Shared
1.74323e-09	-2.95783	0.175	0.117	5.62801e-05	Farp1	Farp1	chr14	121137357	121137607	0.00013792	0.306843	14	0.9165	0.60966	chr14:121137357-121137607	-0.58813	gene_body	chr14	121137607	-0.58813	chr14	121101700	121102891	5.9663000000000001E-4	0.409425	34	0.76511	0.35568	chr14:121101700-121102891	gene_body	chr14	121102891	-1.10509	Shared
1.74323e-09	-2.95783	0.175	0.117	5.62801e-05	Farp1	Farp1	chr14	121137357	121137607	0.00013792	0.306843	14	0.9165	0.60966	chr14:121137357-121137607	-0.58813	gene_body	chr14	121137607	-0.58813	chr14	121107621	121107839	0.017683	0.275677	13	0.39951	0.12383	chr14:121107621-121107839	gene_body	chr14	121107839	-1.68987	Shared
1.74323e-09	-2.95783	0.175	0.117	5.62801e-05	Farp1	Farp1	chr14	121146503	121147657	0.00025283	0.402893	22	0.66801	0.26512	chr14:121146503-121147657	-1.33322	gene_body	chr14	121147657	-1.33322	chr14	121101700	121102891	5.9663000000000001E-4	0.409425	34	0.76511	0.35568	chr14:121101700-121102891	gene_body	chr14	121102891	-1.10509	Shared
1.74323e-09	-2.95783	0.175	0.117	5.62801e-05	Farp1	Farp1	chr14	121146503	121147657	0.00025283	0.402893	22	0.66801	0.26512	chr14:121146503-121147657	-1.33322	gene_body	chr14	121147657	-1.33322	chr14	121107621	121107839	0.017683	0.275677	13	0.39951	0.12383	chr14:121107621-121107839	gene_body	chr14	121107839	-1.68987	Shared
1.91816e-09	-3.36879	0.546	0.598	6.19277e-05	Ets1	Ets1	chr9	32652147	32652546	0.0018365	0.454667	22	0.57333	0.11866	chr9:32652147-32652546	-2.27253	gene_body	chr9	32652546	-2.27253	chr9	32652147	32652546	0.0053551	0.420743	22	0.57333	0.15259	chr9:32652147-32652546	gene_body	chr9	32652546	-1.90971	Shared
1.91816e-09	-3.36879	0.546	0.598	6.19277e-05	Ets1	Ets1	chr9	32652147	32652546	0.0018365	0.454667	22	0.57333	0.11866	chr9:32652147-32652546	-2.27253	gene_body	chr9	32652546	-2.27253	chr9	32661116	32661754	9.4364000000000006E-10	0.446371	22	0.51504	0.068665	chr9:32661116-32661754	gene_body	chr9	32661754	-2.90704	Shared
1.91816e-09	-3.36879	0.546	0.598	6.19277e-05	Ets1	Ets1	chr9	32652147	32652546	0.0018365	0.454667	22	0.57333	0.11866	chr9:32652147-32652546	-2.27253	gene_body	chr9	32652546	-2.27253	chr9	32713221	32715102	0.04643	-0.124747	40	0.077451	0.15126	chr9:32713221-32715102	gene_body	chr9	32715102	0.965675	Shared
5.62288e-09	0.226746	0.206	0.155	0.000181535	Cd47	Cd47	chr16	49936386	49936717	2.7087E-6	0.622712	16	0.70298	0.080266	chr16:49936386-49936717	-3.13062	Distal Intergenic	chr16	49936717	-3.13062	chr16	49936304	49936717	7.6847E-8	0.607442	18	0.68737	0.079928	chr16:49936304-49936717	Distal Intergenic	chr16	49936717	-3.10431	Shared
5.62288e-09	0.226746	0.206	0.155	0.000181535	Cd47	Cd47	chr16	49936386	49936717	2.7087E-6	0.622712	16	0.70298	0.080266	chr16:49936386-49936717	-3.13062	Distal Intergenic	chr16	49936717	-3.13062	chr16	49936776	49938273	0.010211	0.347566	43	0.41894	0.14928	chr16:49936776-49938273	Distal Intergenic	chr16	49938273	-1.48872	Shared
5.62288e-09	0.226746	0.206	0.155	0.000181535	Cd47	Cd47	chr16	49936386	49936717	2.7087E-6	0.622712	16	0.70298	0.080266	chr16:49936386-49936717	-3.13062	Distal Intergenic	chr16	49936717	-3.13062	chr16	49938737	49939248	0.00058957	0.512908	14	0.65076	0.13785	chr16:49938737-49939248	Distal Intergenic	chr16	49939248	-2.23903	Shared
5.62288e-09	0.226746	0.206	0.155	0.000181535	Cd47	Cd47	chr16	49936386	49936717	2.7087E-6	0.622712	16	0.70298	0.080266	chr16:49936386-49936717	-3.13062	Distal Intergenic	chr16	49936717	-3.13062	chr16	49982289	49982590	0.001535	0.445648	10	0.57443	0.12878	chr16:49982289-49982590	Distal Intergenic	chr16	49982590	-2.15722	Shared
5.62288e-09	0.226746	0.206	0.155	0.000181535	Cd47	Cd47	chr16	49938737	49939248	0.97826000000000002	0.539877	14	0.65076	0.11088	chr16:49938737-49939248	-2.55313	Distal Intergenic	chr16	49939248	-2.55313	chr16	49936304	49936717	7.6847E-8	0.607442	18	0.68737	0.079928	chr16:49936304-49936717	Distal Intergenic	chr16	49936717	-3.10431	Shared
5.62288e-09	0.226746	0.206	0.155	0.000181535	Cd47	Cd47	chr16	49938737	49939248	0.97826000000000002	0.539877	14	0.65076	0.11088	chr16:49938737-49939248	-2.55313	Distal Intergenic	chr16	49939248	-2.55313	chr16	49936776	49938273	0.010211	0.347566	43	0.41894	0.14928	chr16:49936776-49938273	Distal Intergenic	chr16	49938273	-1.48872	Shared
5.62288e-09	0.226746	0.206	0.155	0.000181535	Cd47	Cd47	chr16	49938737	49939248	0.97826000000000002	0.539877	14	0.65076	0.11088	chr16:49938737-49939248	-2.55313	Distal Intergenic	chr16	49939248	-2.55313	chr16	49938737	49939248	0.00058957	0.512908	14	0.65076	0.13785	chr16:49938737-49939248	Distal Intergenic	chr16	49939248	-2.23903	Shared
5.62288e-09	0.226746	0.206	0.155	0.000181535	Cd47	Cd47	chr16	49938737	49939248	0.97826000000000002	0.539877	14	0.65076	0.11088	chr16:49938737-49939248	-2.55313	Distal Intergenic	chr16	49939248	-2.55313	chr16	49982289	49982590	0.001535	0.445648	10	0.57443	0.12878	chr16:49982289-49982590	Distal Intergenic	chr16	49982590	-2.15722	Shared
5.62288e-09	0.226746	0.206	0.155	0.000181535	Cd47	Cd47	chr16	49971366	49971932	2.7890000000000002E-2	0.599821	10	0.80717	0.20735	chr16:49971366-49971932	-1.9608	Distal Intergenic	chr16	49971932	-1.9608	chr16	49936304	49936717	7.6847E-8	0.607442	18	0.68737	0.079928	chr16:49936304-49936717	Distal Intergenic	chr16	49936717	-3.10431	Shared
5.62288e-09	0.226746	0.206	0.155	0.000181535	Cd47	Cd47	chr16	49971366	49971932	2.7890000000000002E-2	0.599821	10	0.80717	0.20735	chr16:49971366-49971932	-1.9608	Distal Intergenic	chr16	49971932	-1.9608	chr16	49936776	49938273	0.010211	0.347566	43	0.41894	0.14928	chr16:49936776-49938273	Distal Intergenic	chr16	49938273	-1.48872	Shared
5.62288e-09	0.226746	0.206	0.155	0.000181535	Cd47	Cd47	chr16	49971366	49971932	2.7890000000000002E-2	0.599821	10	0.80717	0.20735	chr16:49971366-49971932	-1.9608	Distal Intergenic	chr16	49971932	-1.9608	chr16	49938737	49939248	0.00058957	0.512908	14	0.65076	0.13785	chr16:49938737-49939248	Distal Intergenic	chr16	49939248	-2.23903	Shared
5.62288e-09	0.226746	0.206	0.155	0.000181535	Cd47	Cd47	chr16	49971366	49971932	2.7890000000000002E-2	0.599821	10	0.80717	0.20735	chr16:49971366-49971932	-1.9608	Distal Intergenic	chr16	49971932	-1.9608	chr16	49982289	49982590	0.001535	0.445648	10	0.57443	0.12878	chr16:49982289-49982590	Distal Intergenic	chr16	49982590	-2.15722	Shared
6.0979e-09	-0.12446	0.058	0.093	0.000196871	Kif13a	Kif13a															chr13	46907925	46909321	2.4235000000000001E-23	0.575737	45	0.83756	0.26183	chr13:46907925-46909321	gene_body	chr13	46909321	-1.67756	only TFH
9.40978e-09	0.490039	0.14	0.089	0.000303795	Ifng	Ifng	chr10	118435150	118435925	5.6612999999999995E-32	0.677956	42	0.8618	0.18384	chr10:118435150-118435925	-2.2289	Distal Intergenic	chr10	118435925	-2.2289														only TR1
9.40978e-09	0.490039	0.14	0.089	0.000303795	Ifng	Ifng	chr10	118458550	118458948	1.4789999999999999E-2	0.454395	12	0.47733	0.022931	chr10:118458550-118458948	-4.37962	Distal Intergenic	chr10	118458948	-4.37962														only TR1
9.4098e-09	-0.19953	0.069	0.104	0.000303795	Mmd	Mmd	chr11	90264235	90264534	5.2105999999999995E-4	0.260905	19	0.27007	0.0091693	chr11:90264235-90264534	-4.88038	gene_body	chr11	90264534	-4.88038	chr11	90264235	90264530	5.5389000000000002E-3	0.228585	17	0.25135	0.02277	chr11:90264235-90264530	gene_body	chr11	90264530	-3.46449	Shared
1.23459e-08	-0.360356	0.054	0.084	0.000398589	Angptl2	Angptl2	chr2	33179175	33180626	7.9842999999999995E-34	0.666416	59	0.80848	0.14206	chr2:33179175-33180626	-2.50871	gene_body	chr2	33180626	-2.50871	chr2	33179454	33180255	4.2162E-18	0.700324	28	0.76221	0.061883	chr2:33179454-33180255	gene_body	chr2	33180255	-3.62257	Shared
1.23459e-08	-0.360356	0.054	0.084	0.000398589	Angptl2	Angptl2	chr2	33203382	33203932	0.00011383	0.485617	21	0.69567	0.21005	chr2:33203382-33203932	-1.72767	gene_body	chr2	33203932	-1.72767	chr2	33179454	33180255	4.2162E-18	0.700324	28	0.76221	0.061883	chr2:33179454-33180255	gene_body	chr2	33180255	-3.62257	Shared
2.25744e-08	-0.100802	0.037	0.067	0.000728814	Gnptab	Gnptab	chr10	88405740	88406128	1.2243000000000001E-6	0.503457	20	0.51335	0.0098956	chr10:88405740-88406128	-5.69701	gene_body	chr10	88406128	-5.69701	chr10	88405740	88406128	1.1998999999999999E-4	0.495262	20	0.51335	0.01809	chr10:88405740-88406128	gene_body	chr10	88406128	-4.82668	Shared
3.67027e-08	0.099803	0.024	0.008	0.00118495	Tnip3	Tnip3	chr6	65539071	65539380	0.00020999	0.692114	10	0.74121	0.049096	chr6:65539071-65539380	-3.9162	gene_body	chr6	65539380	-3.9162	chr6	65472464	65472980	8.9764000000000004E-7	0.601050	16	0.80624	0.20519	chr6:65472464-65472980	Distal Intergenic	chr6	65472980	-1.97425	Shared
3.67027e-08	0.099803	0.024	0.008	0.00118495	Tnip3	Tnip3	chr6	65539071	65539380	0.00020999	0.692114	10	0.74121	0.049096	chr6:65539071-65539380	-3.9162	gene_body	chr6	65539380	-3.9162	chr6	65537849	65538673	5.2635000000000005E-10	0.430962	24	0.51658	0.085619	chr6:65537849-65538673	gene_body	chr6	65538673	-2.59299	Shared
3.67027e-08	0.099803	0.024	0.008	0.00118495	Tnip3	Tnip3	chr6	65539071	65539380	0.00020999	0.692114	10	0.74121	0.049096	chr6:65539071-65539380	-3.9162	gene_body	chr6	65539380	-3.9162	chr6	65539071	65539380	0.0009404	0.562271	10	0.74121	0.17894	chr6:65539071-65539380	gene_body	chr6	65539380	-2.05041	Shared
9.29015e-08	-0.153215	0.114	0.157	0.00299933	Lrrc8d	Lrrc8d	chr5	105686301	105686632	1.6892000000000001E-3	0.442410	15	0.64563	0.20322	chr5:105686301-105686632	-1.66767	Distal Intergenic	chr5	105686632	-1.66767	chr5	105686301	105686632	1.3317E-4	0.546530	15	0.64563	0.099097	chr5:105686301-105686632	Distal Intergenic	chr5	105686632	-2.70379	Shared
1.62306e-07	-38.0782	0.401	0.433	0.00524004	Tnfsf8	Tnfsf8	chr4	63897958	63898677	0.001728	0.394506	31	0.53263	0.13812	chr4:63897958-63898677	-1.94721	Distal Intergenic	chr4	63898677	-1.94721	chr4	63856533	63857629	0.84782999999999997	0.177950	32	0.54576	0.36781	chr4:63856533-63857629	gene_body	chr4	63857629	-0.569306	Shared
1.62306e-07	-38.0782	0.401	0.433	0.00524004	Tnfsf8	Tnfsf8	chr4	63897958	63898677	0.001728	0.394506	31	0.53263	0.13812	chr4:63897958-63898677	-1.94721	Distal Intergenic	chr4	63898677	-1.94721	chr4	63898173	63898678	0.00023894	0.266373	28	0.5334	0.26702	chr4:63898173-63898678	Distal Intergenic	chr4	63898678	-0.99827	Shared
1.62306e-07	-38.0782	0.401	0.433	0.00524004	Tnfsf8	Tnfsf8	chr4	63897958	63898677	0.001728	0.394506	31	0.53263	0.13812	chr4:63897958-63898677	-1.94721	Distal Intergenic	chr4	63898677	-1.94721	chr4	63935343	63935668	0.011534	0.375812	18	0.48807	0.11225	chr4:63935343-63935668	Distal Intergenic	chr4	63935668	-2.12037	Shared
1.62306e-07	-38.0782	0.401	0.433	0.00524004	Tnfsf8	Tnfsf8	chr4	63935190	63936272	6.2908E-3	0.380871	32	0.47128	0.090405	chr4:63935190-63936272	-2.38211	Distal Intergenic	chr4	63936272	-2.38211	chr4	63856533	63857629	0.84782999999999997	0.177950	32	0.54576	0.36781	chr4:63856533-63857629	gene_body	chr4	63857629	-0.569306	Shared
1.62306e-07	-38.0782	0.401	0.433	0.00524004	Tnfsf8	Tnfsf8	chr4	63935190	63936272	6.2908E-3	0.380871	32	0.47128	0.090405	chr4:63935190-63936272	-2.38211	Distal Intergenic	chr4	63936272	-2.38211	chr4	63898173	63898678	0.00023894	0.266373	28	0.5334	0.26702	chr4:63898173-63898678	Distal Intergenic	chr4	63898678	-0.99827	Shared
1.62306e-07	-38.0782	0.401	0.433	0.00524004	Tnfsf8	Tnfsf8	chr4	63935190	63936272	6.2908E-3	0.380871	32	0.47128	0.090405	chr4:63935190-63936272	-2.38211	Distal Intergenic	chr4	63936272	-2.38211	chr4	63935343	63935668	0.011534	0.375812	18	0.48807	0.11225	chr4:63935343-63935668	Distal Intergenic	chr4	63935668	-2.12037	Shared
2.68422e-07	-0.331877	0.128	0.164	0.008666	A430093F15Rik	A430093F15Rik	chr19	10764017	10764418	0.039259	0.407006	10	0.4866	0.079598	chr19:10764017-10764418	-2.61193	gene_body	chr19	10764418	-2.61193														only TR1
2.81756e-07	-0.375097	0.147	0.188	0.0090965	Reps1	Reps1															chr10	18059787	18060060	0.00036943	0.402869	21	0.59985	0.19698	chr10:18059787-18060060	gene_body	chr10	18060060	-1.60655	only TFH
2.81756e-07	-0.375097	0.147	0.188	0.0090965	Reps1	Reps1															chr10	18067999	18068423	0.00016849	0.409270	17	0.82832	0.41905	chr10:18067999-18068423	gene_body	chr10	18068423	-0.983066	only TFH
2.8344e-07	0.112072	0.141	0.101	0.00915085	Zc3h12d	Zc3h12d	chr10	7833901	7834508	3.7747999999999998E-6	0.348269	21	0.35996	0.011688	chr10:7833901-7834508	-4.94474	gene_body	chr10	7834508	-4.94474														only TR1
3.17197e-07	-0.0735145	0.02	0.041	0.0102407	Bcl2l15	Bcl2l15															chr3	103829170	103829526	0.00023625	0.597456	10	0.62229	0.02483	chr3:103829170-103829526	gene_body	chr3	103829526	-4.64743	only TFH
3.17197e-07	-0.0735145	0.02	0.041	0.0102407	Bcl2l15	Bcl2l15															chr3	103836182	103836634	0.35097	0.260255	24	0.87028	0.61003	chr3:103836182-103836634	gene_body	chr3	103836634	-0.512599	only TFH
3.92359e-07	-0.174627	0.064	0.097	0.0126673	Amz2	Amz2	chr11	109410535	109411161	1.066E-6	0.801023	15	0.87726	0.076233	chr11:109410535-109411161	-3.52452	Distal Intergenic	chr11	109411161	-3.52452	chr11	109410535	109410903	1.3022000000000001E-3	0.751375	13	0.87302	0.12164	chr11:109410535-109410903	Distal Intergenic	chr11	109410903	-2.8434	Shared
4.40946e-07	0.191722	0.054	0.034	0.014236	Gpr68	Gpr68	chr12	100880336	100881090	3.5254999999999999E-10	0.631582	24	0.78699	0.15541	chr12:100880336-100881090	-2.34027	gene_body	chr12	100881090	-2.34027	chr12	100871736	100872104	0.0002025	0.504870	10	0.66123	0.15636	chr12:100871736-100872104	gene_body	chr12	100872104	-2.08028	Shared
